# Supplementary material for: Evidence-based genetic variants to gene mapping and prioritization uncovers distinct molecular pathophysiology and therapeutic landscape in polycystic ovary syndrome patients of different ethnicities.
Source: Research Square preprint supplement (doi:10.21203/rs.3.rs-8610143/v1), 2026-01-22
Supplement: Supplementary file 1 [file 0dd0174eebb3fa1c3043ed6e.xlsx]

## Sheet: Table S6.1
Table S6.1.1 Impact of single node removal on pathway crosstalk in ovary							Table S6.1.2 Impact of multiple nodes removal on pathway crosstalk in ovary							Table S6.1.3 Other-disease drug targets enriched among Ovary crosstalk genes
East Asian			European				East Asian			European				East Asian				European
Target	Fraction of nodes disconnected	Significant drug target of other indication (enrichment P value < 0.05)	Target	Fraction of nodes disconnected	Significant drug target of other indication (enrichment P value < 0.05)		No. of nodes removed	Target combination	Fraction of nodes disconnected	No. of nodes removed	Target combination	Fraction of nodes disconnected		Target	Disease	Drug_index	Drug	Target	Disease	Drug_index	Drug
TP53	0.129	Y	CDK9	0.05	Y		2	TP53,GNAS	0.231	3	CDK9,CDK1,ELAVL1	0.125		KRAS	Neoplasm	1	{ADAGRASIB, SOTORASIB} [GTPase KRas inhibitor] (phase4)	APP	Dementia	1	{ADUCANUMAB} [Beta amyloid A4 protein binding agent] (phase4)
ETHE1	0.103	N	AFF4	0.025	N		3	YWHAE,TP53,GNAS	0.308	3	XRCC1,NEIL2,CDK9	0.125		KRAS	Non-small Cell Lung Carcinoma	1	{ADAGRASIB, SOTORASIB} [GTPase KRas inhibitor] (phase4)	APP	Alzheimer Disease	2	{ADUCANUMAB} [Beta amyloid A4 protein binding agent] (phase4), {LECANEMAB} [Beta amyloid A4 protein inhibitor] (phase4)
GNAS	0.103	N	APP	0.025	Y		4	YWHAE,TP53,RUNX1,CTNNB1	0.462					EGFR	Non-small Cell Lung Carcinoma	2	{AFATINIB, BRIGATINIB, DACOMITINIB ANHYDROUS, ERLOTINIB, GEFITINIB, MOBOCERTINIB, NECITUMUMAB, OSIMERTINIB} [Epidermal growth factor receptor erbB1 inhibitor] (phase4), {AMIVANTAMAB} [Epidermal growth factor receptor inhibitor] (phase4)	EGFR	Non-small Cell Lung Carcinoma	3	{AFATINIB, BRIGATINIB, DACOMITINIB ANHYDROUS, ERLOTINIB, GEFITINIB, MOBOCERTINIB, NECITUMUMAB, OSIMERTINIB} [Epidermal growth factor receptor erbB1 inhibitor] (phase4), {AMIVANTAMAB} [Epidermal growth factor receptor inhibitor] (phase4)
SUOX	0.077	N	BRCA1	0.025	N									EML4	Cancer	3	{LORLATINIB} [EML4-ALK inhibitor] (phase4), {ALECTINIB, CERITINIB, CRIZOTINIB} [EML4-ALK] (phase4)	ERBB4	Non-small Cell Lung Carcinoma	4	{AFATINIB, DACOMITINIB ANHYDROUS} [Receptor protein-tyrosine kinase erbB-4 inhibitor] (phase4)
YWHAE	0.077	N	CDK1	0.025	Y									EML4	Neoplasm	3	{LORLATINIB} [EML4-ALK inhibitor] (phase4), {ALECTINIB, CERITINIB, CRIZOTINIB} [EML4-ALK] (phase4)	EGFR	Neoplasm	5	{BRIGATINIB, CETUXIMAB, DACOMITINIB ANHYDROUS, GEFITINIB, MOBOCERTINIB, NECITUMUMAB, OSIMERTINIB, PANITUMUMAB} [Epidermal growth factor receptor erbB1 inhibitor] (phase4), {AMIVANTAMAB, VANDETANIB} [Epidermal growth factor receptor inhibitor] (phase4)
CALM1	0.052	Y	CHEK2	0.025	N									EML4	Non-small Cell Lung Carcinoma	3	{LORLATINIB} [EML4-ALK inhibitor] (phase4), {ALECTINIB, CERITINIB, CRIZOTINIB} [EML4-ALK] (phase4)	RPS27A	Becker Muscular Dystrophy	6	{ATALUREN} [80S Ribosome modulator] (phase4)
DENND1A	0.052	N	CTNNB1	0.025	N									EGFR	Neoplasm	4	{BRIGATINIB, CETUXIMAB, DACOMITINIB ANHYDROUS, GEFITINIB, MOBOCERTINIB, NECITUMUMAB, OSIMERTINIB, PANITUMUMAB} [Epidermal growth factor receptor erbB1 inhibitor] (phase4), {AMIVANTAMAB, VANDETANIB} [Epidermal growth factor receptor inhibitor] (phase4)	RPS26	Becker Muscular Dystrophy	6	{ATALUREN} [80S Ribosome modulator] (phase4)
RUNX1	0.052	N	EGFR	0.025	Y									RPS26	Becker Muscular Dystrophy	5	{ATALUREN} [80S Ribosome modulator] (phase4)	RPS27A	Duchenne Muscular Dystrophy	6	{ATALUREN} [80S Ribosome modulator] (phase4)
ADCYAP1	0.026	N	ELAVL1	0.025	N									RPS26	Duchenne Muscular Dystrophy	5	{ATALUREN} [80S Ribosome modulator] (phase4)	RPS26	Duchenne Muscular Dystrophy	6	{ATALUREN} [80S Ribosome modulator] (phase4)
CAMKMT	0.026	N	EP300	0.025	N									CALM1	Cardiovascular Disease	6	{BENZIODARONE, PRENYLAMINE} [Calmodulin inhibitor] (phase4)	HDAC2	Cancer	7	{VORINOSTAT} [Histone deacetylase 2 inhibitor] (phase4), {BELINOSTAT, PANOBINOSTAT, ROMIDEPSIN} [Histone deacetylase inhibitor] (phase4)
CDH1	0.026	N	ERBB3	0.025	Y									EGFR	Head And Neck Carcinoma	7	{CETUXIMAB} [Epidermal growth factor receptor erbB1 inhibitor] (phase4)	HDAC2	Neoplasm	7	{VORINOSTAT} [Histone deacetylase 2 inhibitor] (phase4), {BELINOSTAT, PANOBINOSTAT, ROMIDEPSIN} [Histone deacetylase inhibitor] (phase4)
CDK1	0.026	Y	ERBB4	0.025	Y									EGFR	Head And Neck Malignant Neoplasia	7	{CETUXIMAB} [Epidermal growth factor receptor erbB1 inhibitor] (phase4)	HDAC2	Mature T-cell And NK-cell Non-Hodgkin Lymphoma	8	{BELINOSTAT, ROMIDEPSIN} [Histone deacetylase inhibitor] (phase4)
CDK2	0.026	Y	FOXP3	0.025	N									EGFR	Head And Neck Neoplasia	7	{CETUXIMAB} [Epidermal growth factor receptor erbB1 inhibitor] (phase4)	HDAC2	Unspecified Peripheral T-cell Lymphoma	8	{BELINOSTAT, ROMIDEPSIN} [Histone deacetylase inhibitor] (phase4)
CTBP1	0.026	N	GATA4	0.025	N									EGFR	Head And Neck Squamous Cell Carcinoma	7	{CETUXIMAB} [Epidermal growth factor receptor erbB1 inhibitor] (phase4)	HDAC2	T-cell Non-Hodgkin Lymphoma	9	{VORINOSTAT} [Histone deacetylase 2 inhibitor] (phase4), {BELINOSTAT, ROMIDEPSIN} [Histone deacetylase inhibitor] (phase4)
CTNNB1	0.026	N	H2AX	0.025	N									EGFR	Malignant Tumor Of Neck	7	{CETUXIMAB} [Epidermal growth factor receptor erbB1 inhibitor] (phase4)	SRC	Myeloid Leukemia	10	{BOSUTINIB} [Tyrosine-protein kinase SRC inhibitor] (phase4)
CYB5R2	0.026	N	H3C12	0.025	N									EGFR	Squamous Cell Carcinoma	7	{CETUXIMAB} [Epidermal growth factor receptor erbB1 inhibitor] (phase4)	SRC	Chronic Myelogenous Leukemia	11	{DASATINIB} [SRC inhibitor] (phase4), {BOSUTINIB} [Tyrosine-protein kinase SRC inhibitor] (phase4)
EGFR	0.026	Y	H3C13	0.025	N									EGFR	Upper Aerodigestive Tract Neoplasm	7	{CETUXIMAB} [Epidermal growth factor receptor erbB1 inhibitor] (phase4)	EGFR	Head And Neck Carcinoma	12	{CETUXIMAB} [Epidermal growth factor receptor erbB1 inhibitor] (phase4)
EML4	0.026	Y	HDAC2	0.025	Y									EGFR	Cancer	8	{CETUXIMAB, DACOMITINIB ANHYDROUS, GEFITINIB, OSIMERTINIB, PANITUMUMAB} [Epidermal growth factor receptor erbB1 inhibitor] (phase4), {VANDETANIB} [Epidermal growth factor receptor inhibitor] (phase4)	EGFR	Head And Neck Malignant Neoplasia	12	{CETUXIMAB} [Epidermal growth factor receptor erbB1 inhibitor] (phase4)
ERBB3	0.026	Y	IRF1	0.025	N									EGFR	Colorectal Adenocarcinoma	9	{CETUXIMAB, PANITUMUMAB} [Epidermal growth factor receptor erbB1 inhibitor] (phase4)	EGFR	Head And Neck Neoplasia	12	{CETUXIMAB} [Epidermal growth factor receptor erbB1 inhibitor] (phase4)
FOXP3	0.026	N	JUN	0.025	N									EGFR	Colorectal Cancer	9	{CETUXIMAB, PANITUMUMAB} [Epidermal growth factor receptor erbB1 inhibitor] (phase4)	EGFR	Head And Neck Squamous Cell Carcinoma	12	{CETUXIMAB} [Epidermal growth factor receptor erbB1 inhibitor] (phase4)
FSHR	0.026	Y	KPNA2	0.025	N									EGFR	Colorectal Carcinoma	9	{CETUXIMAB, PANITUMUMAB} [Epidermal growth factor receptor erbB1 inhibitor] (phase4)	EGFR	Malignant Tumor Of Neck	12	{CETUXIMAB} [Epidermal growth factor receptor erbB1 inhibitor] (phase4)
GRB2	0.026	N	LIG3	0.025	N									EGFR	Colorectal Neoplasm	9	{CETUXIMAB, PANITUMUMAB} [Epidermal growth factor receptor erbB1 inhibitor] (phase4)	EGFR	Squamous Cell Carcinoma	12	{CETUXIMAB} [Epidermal growth factor receptor erbB1 inhibitor] (phase4)
GTF2A2	0.026	N	MAPRE1	0.025	N									LHCGR	Anovulation	10	{CHORIOGONADOTROPIN ALFA} [Luteinizing hormone/Choriogonadotropin receptor agonist] (phase4)	EGFR	Upper Aerodigestive Tract Neoplasm	12	{CETUXIMAB} [Epidermal growth factor receptor erbB1 inhibitor] (phase4)
GTF2B	0.026	N	NEIL2	0.025	N									LHCGR	Hypogonadism	10	{CHORIOGONADOTROPIN ALFA} [Luteinizing hormone/Choriogonadotropin receptor agonist] (phase4)	EGFR	Cancer	13	{CETUXIMAB, DACOMITINIB ANHYDROUS, GEFITINIB, OSIMERTINIB, PANITUMUMAB} [Epidermal growth factor receptor erbB1 inhibitor] (phase4), {VANDETANIB} [Epidermal growth factor receptor inhibitor] (phase4)
IGF1R	0.026	Y	NFKB1	0.025	Y									LHCGR	Infertility	10	{CHORIOGONADOTROPIN ALFA} [Luteinizing hormone/Choriogonadotropin receptor agonist] (phase4)	EGFR	Colorectal Adenocarcinoma	14	{CETUXIMAB, PANITUMUMAB} [Epidermal growth factor receptor erbB1 inhibitor] (phase4)
IKZF1	0.026	N	NRF1	0.025	N									LHCGR	Obesity	10	{CHORIOGONADOTROPIN ALFA} [Luteinizing hormone/Choriogonadotropin receptor agonist] (phase4)	EGFR	Colorectal Cancer	14	{CETUXIMAB, PANITUMUMAB} [Epidermal growth factor receptor erbB1 inhibitor] (phase4)
INSR	0.026	Y	OGG1	0.025	N									LHCGR	Primary Ovarian Insufficiency	10	{CHORIOGONADOTROPIN ALFA} [Luteinizing hormone/Choriogonadotropin receptor agonist] (phase4)	EGFR	Colorectal Carcinoma	14	{CETUXIMAB, PANITUMUMAB} [Epidermal growth factor receptor erbB1 inhibitor] (phase4)
KPNA2	0.026	N	PNKP	0.025	N									LHCGR	Female Infertility	11	{CHORIOGONADOTROPIN ALFA, LUTROPIN ALFA} [Luteinizing hormone/Choriogonadotropin receptor agonist] (phase4)	EGFR	Colorectal Neoplasm	14	{CETUXIMAB, PANITUMUMAB} [Epidermal growth factor receptor erbB1 inhibitor] (phase4)
KRAS	0.026	Y	RAB5B	0.025	N									FSHR	Positive Regulation Of Ovulation	12	{CORIFOLLITROPIN ALFA} [Follicle stimulating hormone receptor agonist] (phase4)	ERBB4	Cancer	15	{VANDETANIB} [Epidermal growth factor receptor inhibitor] (phase4), {DACOMITINIB ANHYDROUS} [Receptor protein-tyrosine kinase erbB-4 inhibitor] (phase4)
LHCGR	0.026	Y	RAD50	0.025	N									EML4	Diffuse Large B-cell Lymphoma	13	{CRIZOTINIB} [EML4-ALK] (phase4)	ERBB4	Neoplasm	15	{VANDETANIB} [Epidermal growth factor receptor inhibitor] (phase4), {DACOMITINIB ANHYDROUS} [Receptor protein-tyrosine kinase erbB-4 inhibitor] (phase4)
MPO	0.026	Y	RPS26	0.025	Y									CDK1	Chronic Lymphocytic Leukemia	14	{DINACICLIB} [Cyclin-dependent kinase 1 inhibitor] (phase3)	SRC	Acute Lymphoblastic Leukemia	16	{DASATINIB} [SRC inhibitor] (phase4)
NRAS	0.026	N	RPS27A	0.025	Y									CDK2	Chronic Lymphocytic Leukemia	15	{DINACICLIB} [Cyclin-dependent kinase 2 inhibitor] (phase3)	SRC	Blast Phase Chronic Myelogenous Leukemia, BCR-ABL1 Positive	16	{DASATINIB} [SRC inhibitor] (phase4)
PAPSS2	0.026	N	SMARCA4	0.025	N									TP53	Myelodysplastic Syndrome	16	{EPRENETAPOPT} [Cellular tumor antigen p53 stabiliser] (phase3)	SRC	Childhood Acute Lymphoblastic Leukemia	16	{DASATINIB} [SRC inhibitor] (phase4)
PTCH1	0.026	N	SRC	0.025	Y									FSHR	Hypogonadism	17	{FOLLITROPIN} [Follicle stimulating hormone receptor agonist] (phase4)	SRC	Childhood Cancer	16	{DASATINIB} [SRC inhibitor] (phase4)
RAB35	0.026	N	TP53	0.025	Y									FSHR	Male Infertility	17	{FOLLITROPIN} [Follicle stimulating hormone receptor agonist] (phase4)	SRC	Lymphoblastic Lymphoma	16	{DASATINIB} [SRC inhibitor] (phase4)
RPS26	0.026	Y	UBA52	0.025	N									FSHR	Primary Ovarian Insufficiency	17	{FOLLITROPIN} [Follicle stimulating hormone receptor agonist] (phase4)	SRC	Lymphoid Leukemia	16	{DASATINIB} [SRC inhibitor] (phase4)
SIN3A	0.026	N	XRCC1	0.025	N									FSHR	Hypogonadotropic Hypogonadism	18	{FOLLITROPIN, FOLLITROPIN BETA} [Follicle stimulating hormone receptor agonist] (phase4)	SRC	Cancer	17	{DASATINIB} [SRC inhibitor] (phase4), {VANDETANIB} [Tyrosine-protein kinase SRC inhibitor] (phase4)
TBP	0.026	N	YAP1	0.025	N									FSHR	Anovulation	19	{FOLLITROPIN ALFA, FOLLITROPIN DELTA} [Follicle stimulating hormone receptor agonist] (phase4)	SRC	Neoplasm	17	{DASATINIB} [SRC inhibitor] (phase4), {VANDETANIB} [Tyrosine-protein kinase SRC inhibitor] (phase4)
YAP1	0.026	N	YWHAE	0.025	N									FSHR	Infertility	20	{FOLLITROPIN BETA} [Follicle stimulating hormone receptor agonist] (phase4)	CDK1	Chronic Lymphocytic Leukemia	18	{DINACICLIB} [Cyclin-dependent kinase 1 inhibitor] (phase3)
			ZBTB16	0.025	N									TP53	Acute Myeloid Leukemia	21	{IDASANUTLIN} [Tumour suppressor p53/oncoprotein Mdm2 inhibitor] (phase3)	CDK9	Chronic Lymphocytic Leukemia	19	{DINACICLIB} [Cyclin-dependent kinase 9 inhibitor] (phase3)
														INSR	Diabetes Mellitus	22	{INSULIN ASPART, INSULIN DEGLUDEC, INSULIN DETEMIR, INSULIN GLARGINE, INSULIN GLULISINE, INSULIN HUMAN, INSULIN LISPRO, INSULIN PURIFIED BEEF, INSULIN PURIFIED PORK} [Insulin receptor agonist] (phase4)	NFKB1	Duchenne Muscular Dystrophy	20	{EDASALONEXENT} [Nuclear factor NF-kappa-B complex inhibitor] (phase3)
														INSR	Type 1 Diabetes Mellitus	23	{INSULIN DETEMIR, INSULIN GLARGINE} [Insulin receptor agonist] (phase4)	TP53	Myelodysplastic Syndrome	21	{EPRENETAPOPT} [Cellular tumor antigen p53 stabiliser] (phase3)
														INSR	Type 2 Diabetes Mellitus	24	{INSULIN DETEMIR, INSULIN GLARGINE, INSULIN HUMAN} [Insulin receptor agonist] (phase4)	TP53	Acute Myeloid Leukemia	22	{IDASANUTLIN} [Tumour suppressor p53/oncoprotein Mdm2 inhibitor] (phase3)
														EGFR	Breast Cancer	25	{LAPATINIB, NERATINIB} [Epidermal growth factor receptor erbB1 inhibitor] (phase4)	EGFR	Breast Cancer	23	{LAPATINIB, NERATINIB} [Epidermal growth factor receptor erbB1 inhibitor] (phase4)
														EGFR	Breast Carcinoma	25	{LAPATINIB, NERATINIB} [Epidermal growth factor receptor erbB1 inhibitor] (phase4)	EGFR	Breast Carcinoma	23	{LAPATINIB, NERATINIB} [Epidermal growth factor receptor erbB1 inhibitor] (phase4)
														EGFR	Breast Neoplasm	25	{LAPATINIB, NERATINIB} [Epidermal growth factor receptor erbB1 inhibitor] (phase4)	EGFR	Breast Neoplasm	23	{LAPATINIB, NERATINIB} [Epidermal growth factor receptor erbB1 inhibitor] (phase4)
														EGFR	HER2 Positive Breast Carcinoma	25	{LAPATINIB, NERATINIB} [Epidermal growth factor receptor erbB1 inhibitor] (phase4)	EGFR	HER2 Positive Breast Carcinoma	23	{LAPATINIB, NERATINIB} [Epidermal growth factor receptor erbB1 inhibitor] (phase4)
														EML4	Lymphoma	26	{LORLATINIB} [EML4-ALK inhibitor] (phase4)	ERBB4	Breast Cancer	24	{NERATINIB} [Receptor protein-tyrosine kinase erbB-4 inhibitor] (phase4)
														LHCGR	Positive Regulation Of Ovulation	27	{LUTROPIN ALFA} [Luteinizing hormone/Choriogonadotropin receptor agonist] (phase4)	ERBB4	Breast Carcinoma	24	{NERATINIB} [Receptor protein-tyrosine kinase erbB-4 inhibitor] (phase4)
														IGF1R	Neoplasm	28	{MASOPROCOL} [Insulin-like growth factor I receptor inhibitor] (phase4)	ERBB4	Breast Neoplasm	24	{NERATINIB} [Receptor protein-tyrosine kinase erbB-4 inhibitor] (phase4)
														IGF1R	Growth Delay	29	{MECASERMIN} [Insulin-like growth factor I receptor agonist] (phase4)	ERBB4	HER2 Positive Breast Carcinoma	24	{NERATINIB} [Receptor protein-tyrosine kinase erbB-4 inhibitor] (phase4)
														IGF1R	Growth Hormone Insensitivity Syndrome	29	{MECASERMIN} [Insulin-like growth factor I receptor agonist] (phase4)	HDAC2	Multiple Myeloma	25	{PANOBINOSTAT} [Histone deacetylase inhibitor] (phase4)
														IGF1R	Hypothyroidism	29	{MECASERMIN} [Insulin-like growth factor I receptor agonist] (phase4)	HDAC2	Cutaneous T-cell Lymphoma	26	{VORINOSTAT} [Histone deacetylase 2 inhibitor] (phase4), {ROMIDEPSIN} [Histone deacetylase inhibitor] (phase4)
														IGF1R	Laron Syndrome	29	{MECASERMIN} [Insulin-like growth factor I receptor agonist] (phase4)	SRC	Actinic Keratosis	27	{TIRBANIBULIN} [Tyrosine-protein kinase SRC inhibitor] (phase4)
														IGF1R	Graves Ophthalmopathy	30	{TEPROTUMUMAB} [Insulin-like growth factor I receptor antagonist] (phase4)	ERBB3	Cancer	28	{VANDETANIB} [Epidermal growth factor receptor inhibitor] (phase4)
														IGF1R	Immune System Disease	30	{TEPROTUMUMAB} [Insulin-like growth factor I receptor antagonist] (phase4)	ERBB4	Medullary Thyroid Gland Carcinoma	28	{VANDETANIB} [Epidermal growth factor receptor inhibitor] (phase4)
														ERBB3	Cancer	31	{VANDETANIB} [Epidermal growth factor receptor inhibitor] (phase4)	ERBB3	Medullary Thyroid Gland Carcinoma	28	{VANDETANIB} [Epidermal growth factor receptor inhibitor] (phase4)
														ERBB3	Medullary Thyroid Gland Carcinoma	31	{VANDETANIB} [Epidermal growth factor receptor inhibitor] (phase4)	EGFR	Medullary Thyroid Gland Carcinoma	28	{VANDETANIB} [Epidermal growth factor receptor inhibitor] (phase4)
														EGFR	Medullary Thyroid Gland Carcinoma	31	{VANDETANIB} [Epidermal growth factor receptor inhibitor] (phase4)	ERBB3	Neoplasm	28	{VANDETANIB} [Epidermal growth factor receptor inhibitor] (phase4)
														ERBB3	Neoplasm	31	{VANDETANIB} [Epidermal growth factor receptor inhibitor] (phase4)	ERBB4	Papillary Thyroid Carcinoma	28	{VANDETANIB} [Epidermal growth factor receptor inhibitor] (phase4)
														ERBB3	Papillary Thyroid Carcinoma	31	{VANDETANIB} [Epidermal growth factor receptor inhibitor] (phase4)	ERBB3	Papillary Thyroid Carcinoma	28	{VANDETANIB} [Epidermal growth factor receptor inhibitor] (phase4)
														EGFR	Papillary Thyroid Carcinoma	31	{VANDETANIB} [Epidermal growth factor receptor inhibitor] (phase4)	EGFR	Papillary Thyroid Carcinoma	28	{VANDETANIB} [Epidermal growth factor receptor inhibitor] (phase4)
														ERBB3	Thyroid Cancer	31	{VANDETANIB} [Epidermal growth factor receptor inhibitor] (phase4)	ERBB4	Thyroid Cancer	28	{VANDETANIB} [Epidermal growth factor receptor inhibitor] (phase4)
														EGFR	Thyroid Cancer	31	{VANDETANIB} [Epidermal growth factor receptor inhibitor] (phase4)	ERBB3	Thyroid Cancer	28	{VANDETANIB} [Epidermal growth factor receptor inhibitor] (phase4)
														ERBB3	Thyroid Carcinoma	31	{VANDETANIB} [Epidermal growth factor receptor inhibitor] (phase4)	EGFR	Thyroid Cancer	28	{VANDETANIB} [Epidermal growth factor receptor inhibitor] (phase4)
														EGFR	Thyroid Carcinoma	31	{VANDETANIB} [Epidermal growth factor receptor inhibitor] (phase4)	ERBB4	Thyroid Carcinoma	28	{VANDETANIB} [Epidermal growth factor receptor inhibitor] (phase4)
														ERBB3	Thyroid Neoplasm	31	{VANDETANIB} [Epidermal growth factor receptor inhibitor] (phase4)	ERBB3	Thyroid Carcinoma	28	{VANDETANIB} [Epidermal growth factor receptor inhibitor] (phase4)
														EGFR	Thyroid Neoplasm	31	{VANDETANIB} [Epidermal growth factor receptor inhibitor] (phase4)	EGFR	Thyroid Carcinoma	28	{VANDETANIB} [Epidermal growth factor receptor inhibitor] (phase4)
														MPO	Multiple System Atrophy	32	{VERDIPERSTAT} [Myeloperoxidase inhibitor] (phase3)	ERBB4	Thyroid Neoplasm	28	{VANDETANIB} [Epidermal growth factor receptor inhibitor] (phase4)
																		ERBB3	Thyroid Neoplasm	28	{VANDETANIB} [Epidermal growth factor receptor inhibitor] (phase4)
																		EGFR	Thyroid Neoplasm	28	{VANDETANIB} [Epidermal growth factor receptor inhibitor] (phase4)
																		SRC	Medullary Thyroid Gland Carcinoma	29	{VANDETANIB} [Tyrosine-protein kinase SRC inhibitor] (phase4)
																		SRC	Papillary Thyroid Carcinoma	29	{VANDETANIB} [Tyrosine-protein kinase SRC inhibitor] (phase4)
																		SRC	Thyroid Cancer	29	{VANDETANIB} [Tyrosine-protein kinase SRC inhibitor] (phase4)
																		SRC	Thyroid Carcinoma	29	{VANDETANIB} [Tyrosine-protein kinase SRC inhibitor] (phase4)
																		SRC	Thyroid Neoplasm	29	{VANDETANIB} [Tyrosine-protein kinase SRC inhibitor] (phase4)

## Sheet: Table S6.2
Table S6.2.1 Impact of single node removal on pathway crosstalk in adipose tissue							Table S6.2.2 Impact of multiple nodes removal on pathway crosstalk in adipose tissue
East Asian			European				European
Target	Fraction of nodes disconnected	Significant drug target of other indication (enrichment P value < 0.05)	Target	Fraction of nodes disconnected	Significant drug target of other indication (enrichment P value < 0.05)		No. of nodes removed	Target combination	Fraction of nodes disconnected
APP	0.658	Y	SUOX	0.05	N		2	CYCS,ETHE1	0.1
YWHAE	0.115	N	APP	0.025	Y		3	IRF1,CYCS,ETHE1	0.15
SUOX	0.086	N	AR	0.025	Y
DENND1A	0.058	N	CDK1	0.025	Y
EGFR	0.058	Y	CDK2	0.025	Y
CGA	0.029	N	CHD4	0.025	N
CGB3	0.029	N	CYB5R2	0.025	N
CGB5	0.029	N	CYCS	0.025	N
CLTC	0.029	N	EGFR	0.025	Y
CYB5R2	0.029	N	ELAVL1	0.025	N
CYCS	0.029	N	EP300	0.025	N
DENND1B	0.029	N	ERBB3	0.025	Y
ERBB3	0.029	Y	ETHE1	0.025	N
ETHE1	0.029	N	FOXP3	0.025	N
FSHB	0.029	N	GSDMD	0.025	N
FSHR	0.029	Y	HDAC1	0.025	Y
GCG	0.029	N	HDAC2	0.025	Y
GPHA2	0.029	N	IFNA10	0.025	Y
GPHB5	0.029	N	IFNA21	0.025	Y
GPHN	0.029	N	IFNA7	0.025	Y
GTF2A2	0.029	N	IRF1	0.025	N
GTF2B	0.029	N	ISG15	0.025	N
LHCGR	0.029	Y	JAK1	0.025	Y
MADD	0.029	N	JUN	0.025	N
MPST	0.029	N	KEAP1	0.025	Y
PAPSS1	0.029	N	KPNA2	0.025	N
PAPSS2	0.029	N	MDM2	0.025	Y
POMC	0.029	N	NFKB1	0.025	Y
RAB35	0.029	N	NRF1	0.025	N
RPS26	0.029	Y	RAB5B	0.025	N
SQOR	0.029	N	RAD50	0.025	N
TBP	0.029	N	REL	0.025	N
TSHB	0.029	N	RELA	0.025	Y
TSHR	0.029	Y	RPS26	0.025	Y
TST	0.029	N	RPS27A	0.025	Y
			SMARCA4	0.025	N
			STAT1	0.025	N
			STAT3	0.025	Y
			TP53	0.025	Y
			UBA52	0.025	N

## Sheet: Table S6.3
Table S6.3.1 Impact of single node removal on pathway crosstalk in liver							Table S6.3.2 Impact of multiple nodes removal on pathway crosstalk in liver
East Asian			European				East Asian			European
Target	Fraction of nodes disconnected	Significant drug target of other indication (enrichment P value < 0.05)	Target	Fraction of nodes disconnected	Significant drug target of other indication (enrichment P value < 0.05)		No. of nodes removed	Target combination	Fraction of nodes disconnected	No. of nodes removed	Target combination	Fraction of nodes disconnected
APP	0.147	Y	CYCS	0.04	N		2	APP,FSHR	0.22	2	CD74,HLA-B	0.118
PAPSS2	0.122	N	PA2G4	0.04	N		3	APP,PRKACA,FSHR	0.269	3	CD74,APP,HLA-B	0.177
FSHR	0.074	Y	APP	0.02	Y		3	RPS27A,APP,UBA52	0.269	4	CD74,APP,PA2G4,HLA-B	0.216
SUOX	0.074	N	CD74	0.02	N		4	RPS27A,APP,PRKACA,UBA52	0.318
FSHB	0.049	N	COMMD7	0.02	N
PRKACA	0.049	N	EP300	0.02	N
CCT7	0.025	N	ERBB3	0.02	Y
CDH1	0.025	N	FAU	0.02	Y
CDK2	0.025	Y	GATA4	0.02	N
CTNNB1	0.025	Y	HLA-B	0.02	N
CYB5R2	0.025	N	HLA-E	0.02	N
EGFR	0.025	Y	HLA-F	0.02	N
EP300	0.025	N	KIR3DL2	0.02	N
ERBB3	0.025	Y	KLRD1	0.02	N
FAU	0.025	Y	NFKB1	0.02	N
GH1	0.025	N	NR0B1	0.02	N
GRB2	0.025	Y	RELA	0.02	N
HLA-B	0.025	N	RPL18	0.02	Y
HSP90AB1	0.025	Y	RPL18A	0.02	Y
INSR	0.025	Y	RPL19	0.02	Y
KIR3DL2	0.025	Y	RPL28	0.02	Y
LEP	0.025	N	RPL29	0.02	Y
LHCGR	0.025	Y	RPL30	0.02	Y
PA2G4	0.025	N	RPL34	0.02	Y
PAPSS1	0.025	N	RPL35A	0.02	Y
PRL	0.025	N	RPL36	0.02	Y
PTPN11	0.025	Y	RPL38	0.02	Y
RPS17	0.025	Y	RPL8	0.02	Y
RPS21	0.025	Y	RPS11	0.02	Y
RPS24	0.025	Y	RPS15	0.02	Y
RPS25	0.025	Y	RPS16	0.02	Y
RPS26	0.025	Y	RPS17	0.02	Y
RPS27A	0.025	Y	RPS18	0.02	Y
RPS28	0.025	Y	RPS19	0.02	Y
RPS3A	0.025	Y	RPS2	0.02	Y
RUNX1	0.025	N	RPS21	0.02	Y
SQOR	0.025	N	RPS23	0.02	Y
SRC	0.025	Y	RPS24	0.02	Y
TP53	0.025	Y	RPS25	0.02	Y
TPH2	0.025	Y	RPS26	0.02	Y
UBA52	0.025	N	RPS27A	0.02	Y
			RPS28	0.02	Y
			RPS29	0.02	Y
			RPS3	0.02	Y
			RPS3A	0.02	Y
			RPS6	0.02	Y
			RPS7	0.02	Y
			RPS8	0.02	Y
			RPS9	0.02	Y
			SUOX	0.02	N
			UBA52	0.02	N

## Sheet: Table S6.4
Table S6.4.1 Impact of single node removal on pathway crosstalk in muscle							Table S6.4.2 Impact of multiple nodes removal on pathway crosstalk in muscle
East Asian			European				East Asian			European
Target	Fraction of nodes disconnected	Significant drug target of other indication (enrichment P value < 0.05)	Target	Fraction of nodes disconnected	Significant drug target of other indication (enrichment P value < 0.05)		No. of nodes removed	Target combination	Fraction of nodes disconnected	No. of nodes removed	Target combination	Fraction of nodes disconnected
SMAD2	0.25	N	CDK2	0.064	Y		2	SMAD2,EGFR	0.334	3	CDK2,H3C12,HDAC2	0.128
SQOR	0.223	N	CYCS	0.043	N		3	SMAD2,EGFR,RIN1	0.417	3	RAB35,YWHAE,CDK2	0.128
SUOX	0.112	N	AR	0.022	Y		4	SMAD2,EGFR,RIN1,DENND1A	0.473
EGFR	0.084	N	BRCA1	0.022	N		4	SMAD2,EGFR,RIN1,YWHAB	0.473
DENND1A	0.056	N	CDK1	0.022	Y
CDK2	0.028	N	CHEK2	0.022	Y
CLTC	0.028	N	CTNNB1	0.022	Y
CYB5R2	0.028	N	DENND1A	0.022	N
DENND1B	0.028	N	DNMT3B	0.022	N
EEA1	0.028	N	EEA1	0.022	N
ERBB3	0.028	N	EGFR	0.022	Y
ETHE1	0.028	N	EP300	0.022	N
FANCC	0.028	N	ERBB3	0.022	Y
GAPVD1	0.028	N	ERBB4	0.022	Y
GDI1	0.028	N	FANCC	0.022	N
GDI2	0.028	N	FGF9	0.022	N
GPHN	0.028	N	GAPVD1	0.022	N
INSR	0.028	N	GATA4	0.022	N
MADD	0.028	N	GDI1	0.022	N
MPST	0.028	N	GDI2	0.022	N
NRG1	0.028	N	H3C12	0.022	N
PAPSS2	0.028	N	HDAC2	0.022	Y
PIK3C3	0.028	N	IRF1	0.022	N
RAB35	0.028	N	KEAP1	0.022	Y
RAB5A	0.028	N	LIG3	0.022	N
RAB5B	0.028	N	MAPRE1	0.022	N
RAB5C	0.028	N	MDM2	0.022	Y
RABGEF1	0.028	N	NEIL2	0.022	N
RIN1	0.028	N	NFKB1	0.022	Y
RIN2	0.028	N	RAB35	0.022	N
RIN3	0.028	N	RAB5A	0.022	N
THADA	0.028	N	RAB5B	0.022	N
TST	0.028	N	RAB5C	0.022	N
YAP1	0.028	N	RABGEF1	0.022	N
YWHAB	0.028	N	RIN1	0.022	N
YWHAE	0.028	N	RIN2	0.022	N
			RIN3	0.022	N
			RPS26	0.022	Y
			SMARCA4	0.022	N
			STAT1	0.022	N
			STAT3	0.022	Y
			SUOX	0.022	N
			TP53	0.022	Y
			XRCC1	0.022	N
			YAP1	0.022	N
			YWHAE	0.022	N
			ZBTB16	0.022	N

## Sheet: Table S6.5
Table S6.5.1 Impact of single node removal on pathway crosstalk in pancreas							Table S6.5.2 Impact of multiple nodes removal on pathway crosstalk in pancreas
East Asian			European				East Asian
Target	Fraction of nodes disconnected	Significant drug target of other indication (enrichment P value < 0.05)	Target	Fraction of nodes disconnected	Significant drug target of other indication (enrichment P value < 0.05)		No. of nodes removed	Target combination	Fraction of nodes disconnected
SUOX	0.129	N	IRF1	0.05	N		2	CDK2,TP53	0.334
CDK1	0.052	Y	APP	0.025	Y		3	CDK2,TP53,CDK1	0.385
CDH1	0.026	N	AR	0.025	Y
CDK2	0.026	Y	CD74	0.025	N
CYB5R2	0.026	N	CHD4	0.025	N
CYCS	0.026	N	CTNNB1	0.025	Y
EGFR	0.026	Y	EGFR	0.025	Y
ERBB2	0.026	Y	EP300	0.025	N
ERBB3	0.026	Y	ERBB3	0.025	Y
ETHE1	0.026	N	FAU	0.025	Y
FLT3LG	0.026	N	GATA4	0.025	N
GPHN	0.026	N	GSDMD	0.025	N
HABP4	0.026	N	HABP4	0.025	N
HADHB	0.026	N	HDAC1	0.025	Y
INSR	0.026	Y	HDAC2	0.025	Y
MPST	0.026	N	IFNA10	0.025	Y
NRG1	0.026	N	ISG15	0.025	N
PA2G4	0.026	N	JUN	0.025	N
PAPSS1	0.026	N	KPNA2	0.025	N
PAPSS2	0.026	N	MAPRE1	0.025	N
RAB5B	0.026	N	MDM2	0.025	Y
RPL18	0.026	Y	MED1	0.025	N
RPL28	0.026	Y	NFKB1	0.025	Y
RPL29	0.026	Y	NPM1	0.025	Y
RPL30	0.026	Y	PA2G4	0.025	N
RPL34	0.026	Y	QARS1	0.025	N
RPL36	0.026	Y	RPL19	0.025	Y
RPS17	0.026	Y	RPS21	0.025	Y
RPS21	0.026	Y	RPS23	0.025	Y
RPS23	0.026	Y	RPS26	0.025	Y
RPS25	0.026	Y	RPS27A	0.025	Y
RPS26	0.026	Y	RPS3A	0.025	Y
RPS27A	0.026	Y	SIN3A	0.025	N
RPS28	0.026	Y	SMARCA4	0.025	N
RPS29	0.026	Y	STAT1	0.025	N
SQOR	0.026	N	STAT3	0.025	Y
TP53	0.026	Y	TP53	0.025	Y
TST	0.026	N	UBA52	0.025	N
YAP1	0.026	N	YAP1	0.025	N
			ZBTB16	0.025	N

## Sheet: Table S6.6
Table S6.6.1 Impact of single node removal on pathway crosstalk in cortex							Table S6.6.2 Impact of multiple nodes removal on pathway crosstalk in cortex
East Asian			European				East Asian			European
Target	Fraction of nodes disconnected	Significant drug target of other indication (enrichment P value < 0.05)	Target	Fraction of nodes disconnected	Significant drug target of other indication (enrichment P value < 0.05)		No. of nodes removed	Target combination	Fraction of nodes disconnected	No. of nodes removed	Target combination	Fraction of nodes disconnected
CDK2	0.079	N	CDK1	0.074	N		2	CDK2,PA2G4	0.132	2	EGFR,CDK1	0.122
CYCS	0.053	N	EGFR	0.049	Y		2	YWHAE,CDK2	0.132	2	EP300,CDK1	0.122
PA2G4	0.053	N	RPS10	0.049	Y		3	YWHAE,CDK2,PA2G4	0.185	2	CDK1,RPS10	0.122
YWHAE	0.053	N	DNMT3B	0.025	N					3	EP300,EGFR,CDK1	0.171
DENND1A	0.027	N	EP300	0.025	N					3	EGFR,CDK1,RPS10	0.171
ERBB3	0.027	Y	ERBB3	0.025	Y					3	EP300,CDK1,RPS10	0.171
FAU	0.027	Y	FAU	0.025	Y					3	TP53,RPS26,CDK1	0.171
HABP4	0.027	N	GAPVD1	0.025	N					4	TP53,EGFR,RPS3,RPS26	0.244
PAN2	0.027	N	HABP4	0.025	N
RPL10L	0.027	N	MAPRE1	0.025	N
RPL11	0.027	Y	RAB5B	0.025	N
RPL18	0.027	Y	RPL11	0.025	Y
RPL19	0.027	Y	RPL18	0.025	Y
RPL24	0.027	Y	RPL19	0.025	Y
RPL28	0.027	Y	RPL30	0.025	Y
RPL30	0.027	Y	RPL31	0.025	Y
RPL31	0.027	Y	RPL34	0.025	Y
RPL34	0.027	Y	RPL35	0.025	Y
RPL35	0.027	Y	RPL35A	0.025	Y
RPL35A	0.027	Y	RPL36	0.025	Y
RPL36	0.027	Y	RPL5	0.025	Y
RPL6	0.027	Y	RPL8	0.025	Y
RPS15	0.027	Y	RPS11	0.025	Y
RPS17	0.027	Y	RPS15	0.025	Y
RPS18	0.027	Y	RPS17	0.025	Y
RPS19	0.027	Y	RPS18	0.025	Y
RPS21	0.027	Y	RPS19	0.025	Y
RPS25	0.027	Y	RPS2	0.025	Y
RPS26	0.027	Y	RPS21	0.025	Y
RPS27A	0.027	Y	RPS23	0.025	Y
RPS28	0.027	Y	RPS24	0.025	Y
RPS3	0.027	Y	RPS25	0.025	Y
RPS3A	0.027	Y	RPS26	0.025	Y
RPS6	0.027	Y	RPS27A	0.025	Y
RPS7	0.027	Y	RPS28	0.025	Y
RPS8	0.027	Y	RPS3	0.025	Y
SUOX	0.027	N	RPS3A	0.025	Y
UBA52	0.027	N	RPS6	0.025	Y
			RPS7	0.025	Y
			TP53	0.025	N
			UBA52	0.025	N

## Sheet: Table S6.7
Table S6.7.1 Impact of single node removal on pathway crosstalk in pituitary							Table S6.7.2 Impact of multiple nodes removal on pathway crosstalk in pituitary
East Asian			European				European
Target	Fraction of nodes disconnected	Significant drug target of other indication (enrichment P value < 0.05)	Target	Fraction of nodes disconnected	Significant drug target of other indication (enrichment P value < 0.05)		No. of nodes removed	Target combination	Fraction of nodes disconnected
GNAS	0.167	N	EP300	0.106	N		2	FSHR,GATA4	0.369
EGFR	0.139	Y	CDK2	0.079	N		3	GIP,NPPA,FSHR	0.422
ERBB3	0.112	Y	YAP1	0.079	N
PA2G4	0.084	N	CYCS	0.053	N
ADCYAP1	0.028	N	ERBB4	0.053	Y
ADORA2A	0.028	Y	GATA4	0.053	N
ADRB1	0.028	Y	ADORA2A	0.027	Y
CDK2	0.028	N	ADRB1	0.027	Y
CGA	0.028	N	CGA	0.027	N
CGB3	0.028	N	CGB3	0.027	N
CGB5	0.028	N	CGB5	0.027	N
CGB8	0.028	N	DRD1	0.027	Y
DRD1	0.028	Y	DRD5	0.027	Y
DRD5	0.028	Y	ERBB3	0.027	Y
FSHB	0.028	N	FSHB	0.027	N
FSHR	0.028	Y	FSHR	0.027	Y
GCG	0.028	N	GIP	0.027	N
GIP	0.028	N	GIPR	0.027	Y
GIPR	0.028	Y	GNAS	0.027	N
GNB1	0.028	N	GPHA2	0.027	N
GNG2	0.028	N	GPHB5	0.027	N
GPHA2	0.028	N	GPR119	0.027	N
GPHB5	0.028	N	HTR6	0.027	Y
GPR119	0.028	N	LHCGR	0.027	Y
HTR6	0.028	Y	MAPRE1	0.027	N
LHCGR	0.028	Y	MC2R	0.027	Y
MC2R	0.028	Y	MESP1	0.027	N
NPPA	0.028	N	NPPA	0.027	N
NPR1	0.028	Y	NPR1	0.027	Y
POMC	0.028	N	NR0B1	0.027	N
PTGER2	0.028	Y	POMC	0.027	N
RPS26	0.028	Y	PTGER2	0.027	Y
TSHB	0.028	N	RPS26	0.027	Y
TSHR	0.028	Y	SUOX	0.027	N
VIP	0.028	N	TSHB	0.027	N
VIPR2	0.028	N	TSHR	0.027	Y
			VIPR2	0.027	N
			ZBTB16	0.027	N
