# Supplementary material for: Evidence-based genetic variants to gene mapping and prioritization uncovers distinct molecular pathophysiology and therapeutic landscape in polycystic ovary syndrome patients of different ethnicities.
Source: Research Square preprint supplement (doi:10.21203/rs.3.rs-8610143/v1), 2026-01-22
Supplement: Supplementary file 2 [file 0ed3694224217d8a6feae7be.xlsx]

## Sheet: Table S2.1
Table S2.1.1 Top prioritized targets from the integrated Si method for East Asian Ovary																	Table S2.1.2 Pathway enrichment of top 50 genes of East Asian Ovary							Table S2.1.3 Pathway enrichment of top 75 genes of East Asian Ovary							Table S2.1.4 Pathway enrichment of top 100 genes of East Asian Ovary							Table S2.1.5 Pathway enrichment of top 175 genes of East Asian Ovary
Target gene	Priority		Genomic predictors			Seeds	Annotation predictors			Crosstalk	Novelty		Druggability		Description		Pathway	Pathway Size	Overlap Count	Z-score	Adjusted P-value	Odds Ratio		Pathway	Pathway Size	Overlap Count	Z-score	Adjusted P-value	Odds Ratio		Pathway	Pathway Size	Overlap Count	Z-score	Adjusted P-value	Odds Ratio		Pathway	Pathway Size	Overlap Count	Z-score	Adjusted P-value	Odds Ratio
	rank	rating	rGene	cGene	qGene		fGene	pGene	dGene		PCOS drug traget	Approved for other diseases	PDBs	PDBs (with pockets)			Constitutive Signaling by EGFRvIII	15	5	23.5	3.5e-08	184		Constitutive Signaling by Ligand-Responsive EGFR Cancer Variants	19	9	30.6	3.7e-15	225		Signaling by ERBB2 in Cancer	26	12	30.2	1.5e-18	161		Downstream signaling of activated FGFR2	30	21	37.4	7.5e-34	253
ERBB3	1	5	1	0	0	Y	1	0	1	Y	N	Y	21	8	erb-b2 receptor tyrosine kinase 3		Signaling by ERBB2 ECD mutants	16	5	22.7	4.2e-08	167		Hormone ligand-binding receptors	12	7	30	1.1e-12	340		Signaling by PDGFRA transmembrane, juxtamembrane and kinase domain mutants	12	8	29.7	1.9e-14	358		Constitutive Signaling by Aberrant PI3K in Cancer	78	31	33.9	9.4e-40	76.5
IKZF4	2	4.99812	1	0	0	Y	1	0	1	N	N	N	1	0	IKAROS family zinc finger 4		Signaling by FGFR4 in disease	11	4	21.9	5.8e-07	205		Signaling by ERBB2 ECD mutants	16	8	29.7	9.8e-14	247		Constitutive Signaling by Ligand-Responsive EGFR Cancer Variants	19	10	29.4	3e-16	203		Downstream signaling of activated FGFR1	31	19	33.2	4.3e-29	170
CDK2	3	4.69202	1	0	0	Y	1	0	0	Y	N	N	428	239	cyclin dependent kinase 2		Signaling by ERBB2 in Cancer	26	6	21.3	1.2e-08	113		Signaling by ERBB2 in Cancer	26	10	29	1.7e-15	159		Signaling by ERBB2 ECD mutants	16	9	28.9	4.3e-15	233		Downstream signaling of activated FGFR3	25	17	33.1	3.1e-27	224
RPS26	4	4.68531	1	0	1	Y	1	0	0	Y	N	Y	15	3	ribosomal protein S26		Signaling by PDGFRA transmembrane, juxtamembrane and kinase domain mutants	12	4	21	8e-07	180		Signaling by ERBB2	50	13	27.1	1.7e-17	94.1		SHC1 events in ERBB2 signaling	22	10	27.3	1.4e-15	153		FRS-mediated FGFR2 signaling	25	17	33.1	3.1e-27	224
SUOX	5	4.67079	1	0	1	Y	1	0	0	Y	N	N	1	0	sulfite oxidase		Constitutive Signaling by Ligand-Responsive EGFR Cancer Variants	19	5	20.8	9.5e-08	132		Signaling by FGFR4 in disease	11	6	26.9	6.5e-11	287		Signaling by ERBB2	50	15	27	9e-20	83.3		PI-3K cascade:FGFR2	23	16	32.5	6.4e-26	240
FSHR	6	4.65942	1	0	0	Y	1	0	1	Y	P3	Y	3	0	follicle stimulating hormone receptor		SHC1 events in EGFR signaling	14	4	19.4	1.4e-06	144		Constitutive Signaling by EGFRvIII	15	7	26.8	6e-12	212		Constitutive Signaling by EGFRvIII	15	8	26.5	1.6e-13	205		Signaling by FGFR1	52	24	32.2	1.2e-32	94.9
LHCGR	7	4.60493	1	0	0	Y	1	0	0	Y	P3	Y	4	2	luteinizing hormone/choriogonadotropin receptor		SHC1 events in ERBB2 signaling	22	5	19.3	1.7e-07	109		Signaling by EGFR in Cancer	25	9	26.6	6.9e-14	142		Hormone ligand-binding receptors	12	7	26	2.7e-12	248		Signaling by FGFR3	40	21	32.2	3.9e-30	120
YAP1	8	4.59038	1	0	0	Y	1	0	0	Y	N	N	27	17	Yes associated protein 1		Signaling by EGFR in Cancer	25	5	18.1	2.7e-07	92.1		GRB2 events in ERBB2 signaling	16	7	25.9	1e-11	188		Signaling by KIT in disease	20	9	25.8	2.9e-14	149		PI3K/AKT Signaling in Cancer	105	34	31.9	4.7e-40	56.6
TBPL1	9	4.5878	0	0	0	N	0	0	0	N	N	N	0	0	TATA-box binding protein like 1		GRB2 events in ERBB2 signaling	16	4	18.1	2.1e-06	120		Signaling by PDGFRA transmembrane, juxtamembrane and kinase domain mutants	12	6	25.7	1.2e-10	240		GRB2 events in ERBB2 signaling	16	8	25.7	3e-13	179		SHC-mediated cascade:FGFR1	21	15	31.9	1.3e-24	262
INSR	10	4.56705	1	0	0	Y	1	0	0	Y	N	Y	55	25	insulin receptor		PI3K events in ERBB2 signaling	16	4	18.1	2.1e-06	120		SHC1 events in ERBB2 signaling	22	8	25.2	1.6e-12	142		Signaling by EGFR in Cancer	25	10	25.6	5.5e-15	123		Signaling by FGFR4	41	21	31.8	7.3e-30	114
DENND1A	11	4.55439	1	1	0	Y	1	0	0	Y	N	N	1	1	DENN domain containing 1A		Signaling by FLT3 ITD and TKD mutants	16	4	18.1	2.1e-06	120		Signaling by NTRK3 (TRKC)	17	7	25.2	1.5e-11	171		Signaling by Erythropoietin	25	10	25.6	5.5e-15	123		Downstream signaling of activated FGFR4	27	17	31.8	2.2e-26	179
STON1-GTF2A1L	12	4.4924	1	0	1	Y	0	0	1	N	N	N	0	0	STON1-GTF2A1L readthrough		Signaling by NTRK3 (TRKC)	17	4	17.6	2.6e-06	111		Signaling by ERBB4	58	12	23.1	2.8e-15	68.6		Signaling by NTRK3 (TRKC)	17	8	24.9	5.1e-13	160		Insulin receptor signalling cascade	54	24	31.6	3.3e-32	88.5
TBP	13	4.4879	0	0	0	N	0	0	0	Y	N	N	39	8	TATA-box binding protein		RUNX3 regulates p14-ARF	10	3	17.2	2e-05	151		Signaling by KIT in disease	20	7	23.1	4.9e-11	131		Tie2 Signaling	18	8	24.2	8.8e-13	144		Signaling by Type 1 Insulin-like Growth Factor 1 Receptor (IGF1R)	54	24	31.6	3.3e-32	88.5
GTF2A2	14	4.45088	0	0	0	N	0	0	0	Y	N	N	28	4	general transcription factor IIA subunit 2		Gastrin-CREB signalling pathway via PKC and MAPK	18	4	17.1	3e-06	103		Constitutive Signaling by Overexpressed ERBB2	11	5	22.4	9.2e-09	196		SHC1 events in ERBB4 signaling	14	7	24	1e-11	177		Constitutive Signaling by Ligand-Responsive EGFR Cancer Variants	19	14	31.3	2.7e-23	289
GTF2B	15	4.43247	0	0	0	N	0	0	0	Y	N	N	29	7	general transcription factor IIB		Tie2 Signaling	18	4	17.1	3e-06	103		PI3K events in ERBB2 signaling	16	6	22.2	8.5e-10	145		DAP12 signaling	29	10	23.7	1.9e-14	97.1		Negative regulation of the PI3K/AKT network	113	34	30.6	5.3e-39	50.9
IKZF3	16	4.29679	1	0	0	Y	0	0	1	N	N	N	0	0	IKAROS family zinc finger 3		Signaling by FLT3 fusion proteins	19	4	16.6	3.4e-06	96.3		Downstream signal transduction	29	8	21.9	1.4e-11	94.1		Downstream signal transduction	29	10	23.7	1.9e-14	97.1		Signaling by ERBB2 in Cancer	26	16	30.5	1.2e-24	167
RAB35	17	4.27234	0	0	0	N	0	0	0	Y	N	N	4	3	RAB35, member RAS oncogene family		Signaling by ERBB4	58	7	16.5	2.8e-08	53		Signaling by FGFR3	40	9	20.9	4.4e-12	72.9		Signaling by ERBB4	58	14	23.3	2.5e-17	61.3		FRS-mediated FGFR1 signaling	23	15	30.5	1.1e-23	196
EGFR	18	4.25527	0	0	0	N	0	0	0	Y	N	Y	252	131	epidermal growth factor receptor		Activated NTRK2 signals through FRS2 and FRS3	11	3	16.4	2.5e-05	132		Tie2 Signaling	18	6	20.9	1.9e-09	120		Constitutive Signaling by Overexpressed ERBB2	11	6	23.2	1.9e-10	211		Signaling by ERBB2	50	22	30.1	1.9e-29	85.8
RUNX1	19	4.23055	0	0	0	N	0	0	0	Y	N	N	5	3	runt related transcription factor 1		Constitutive Signaling by Overexpressed ERBB2	11	3	16.4	2.5e-05	132		Signaling by EGFR	50	10	20.7	8.8e-13	63.8		Signaling by FGFR4 in disease	11	6	23.2	1.9e-10	211		Negative regulation of FGFR2 signaling	34	18	30	4.8e-26	119
KPNA2	20	4.18529	0	0	1	Y	1	0	0	Y	N	N	11	5	karyopherin subunit alpha 2		MET activates RAS signaling	11	3	16.4	2.5e-05	132		Signaling by FGFR4	41	9	20.6	5.2e-12	70.7		Signaling by CSF1 (M-CSF) in myeloid cells	31	10	22.9	3.7e-14	87.5		Phospholipase C-mediated cascade; FGFR2	18	13	29.9	1.8e-21	266
GRB2	21	4.18499	0	0	0	N	0	0	0	Y	N	N	54	27	growth factor receptor bound protein 2		Signaling by KIT in disease	20	4	16.2	3.9e-06	90.2		Signaling by NTRK2 (TRKB)	25	7	20.6	2.3e-10	94.6		Signaling by PDGFR in disease	20	8	22.9	2.4e-12	120		SHC-mediated cascade:FGFR3	18	13	29.9	1.8e-21	266
PAPSS2	22	4.10921	0	0	0	N	0	0	0	Y	N	N	3	0	3'-phosphoadenosine 5'-phosphosulfate synthase 2		Signaling by PDGFR in disease	20	4	16.2	3.9e-06	90.2		Downregulation of ERBB2:ERBB3 signaling	13	5	20.5	2.1e-08	148		PI3K events in ERBB2 signaling	16	7	22.4	3e-11	138		PI-3K cascade:FGFR1	21	14	29.8	2.4e-22	207
IGF1R	23	4.06111	0	0	0	N	0	0	0	Y	N	Y	31	20	insulin like growth factor 1 receptor		Hormone ligand-binding receptors	12	3	15.7	3e-05	117		Signaling by PTK6	54	10	19.9	1.6e-12	58		Signaling by FGFR3	40	11	22.1	1.4e-14	70.6		IRS-mediated signalling	48	21	29.3	4.7e-28	84.4
PTCH1	24	4.06092	0	1	0	Y	1	0	0	Y	N	N	15	13	patched 1		ESR-mediated signaling	161	11	15.3	3.8e-10	31.1		Listeria monocytogenes entry into host cells	20	6	19.8	3.4e-09	103		Signaling by ALK	27	9	22.1	5.1e-13	90.9		Signaling by ERBB2 ECD mutants	16	12	29.3	3.4e-20	307
MPO	25	4.0499	0	0	1	Y	1	0	0	Y	N	N	32	10	myeloperoxidase		Signaling by ERBB2	50	6	15.2	2.3e-07	51.4		Signaling by PDGFR in disease	20	6	19.8	3.4e-09	103		Signaling by FGFR4	41	11	21.8	1.8e-14	68.2		Diseases of signal transduction by growth factor receptors and second messengers	428	64	28.8	1.5e-54	26.1
CDH1	26	4.04897	0	0	0	N	0	0	0	Y	N	N	15	3	cadherin 1		Zygotic genome activation (ZGA)	13	3	15.1	3.6e-05	106		SHC1 events in EGFR signaling	14	5	19.8	2.9e-08	132		Regulation of signaling by CBL	22	8	21.8	5.7e-12	103		Signaling by FGFR2	72	25	28.3	2.5e-30	59.2
GNAS	27	4.02624	0	0	0	N	0	0	0	Y	N	N	118	48	GNAS complex locus		Erythropoietin activates RAS	14	3	14.5	4.2e-05	96.4		SHC1 events in ERBB4 signaling	14	5	19.8	2.9e-08	132		Signaling by PTK6	54	12	20.7	1.1e-14	53.7		FRS-mediated FGFR3 signaling	20	13	28.3	1.4e-20	192
IKZF1	28	4.0186	0	0	0	N	0	0	0	Y	N	N	3	0	IKAROS family zinc finger 1		SHC1 events in ERBB4 signaling	14	3	14.5	4.2e-05	96.4		FLT3 signaling in disease	28	7	19.5	5.3e-10	81.2		SHC1 events in EGFR signaling	14	6	20.5	1.1e-09	132		SHC-mediated cascade:FGFR4	20	13	28.3	1.4e-20	192
TP53	29	4.01182	0	0	0	N	0	0	0	Y	N	N	170	63	tumor protein p53		Downstream signaling of activated FGFR3	25	4	14.4	7.2e-06	68.8		DAP12 signaling	29	7	19.1	6.7e-10	77.8		Downstream signaling of activated FGFR3	25	8	20.4	1.7e-11	84.9		Signaling by FGFR2 in disease	43	19	28	1.4e-25	84.8
CAMKMT	30	4.00308	0	1	0	Y	1	0	0	Y	N	N	1	0	calmodulin-lysine N-methyltransferase		Signaling by Erythropoietin	25	4	14.4	7.2e-06	68.8		Signaling by FLT3 ITD and TKD mutants	16	5	18.5	5.6e-08	108		Signaling by NTRK2 (TRKB)	25	8	20.4	1.7e-11	84.9		Constitutive Signaling by EGFRvIII	15	11	27.7	2.1e-18	279
YWHAE	31	4.00017	0	0	0	N	0	0	0	Y	N	N	5	0	tyrosine 3-monooxygenase/tryptophan 5-monooxygenase activation protein epsilon		Signaling by NTRK2 (TRKB)	25	4	14.4	7.2e-06	68.8		Signaling by FGFR1	52	9	18.2	3.6e-11	52.6		Signaling by EGFR	50	11	19.7	1.3e-13	52.4		PI-3K cascade:FGFR3	18	12	27.5	3e-19	205
ADCYAP1	32	3.99752	0	0	0	N	0	0	0	Y	N	N	8	3	adenylate cyclase activating polypeptide 1		Downstream signaling of activated FGFR4	27	4	13.8	9.7e-06	62.8		Activated NTRK2 signals through FRS2 and FRS3	11	4	17.8	7.8e-07	134		Downstream signaling of activated FGFR4	27	8	19.6	3e-11	75.8		Signaling by EGFR in Cancer	25	14	27.2	8.1e-21	133
SIN3A	33	3.96621	0	0	0	N	0	0	0	Y	N	N	0	0	SIN3 transcription regulator family member A		FLT3 signaling in disease	28	4	13.6	1.1e-05	60.2		MET activates RAS signaling	11	4	17.8	7.8e-07	134		Signaling by FGFR1	52	11	19.3	2e-13	50		Negative regulation of FGFR1 signaling	33	16	27	2e-22	98.9
CTBP1	34	3.96536	0	0	0	N	0	0	0	Y	N	N	9	1	C-terminal binding protein 1		DAP12 signaling	29	4	13.3	1.2e-05	57.8		Downstream signaling of activated FGFR3	25	6	17.6	1.3e-08	76		MET activates RAS signaling	11	5	19.3	2.3e-08	145		FRS-mediated FGFR4 signaling	22	13	26.9	8.1e-20	149
ETHE1	35	3.96498	0	0	0	N	0	0	0	Y	N	N	1	0	ETHE1, persulfide dioxygenase		Downstream signal transduction	29	4	13.3	1.2e-05	57.8		Signaling by Erythropoietin	25	6	17.6	1.3e-08	76		DAP12 interactions	44	10	19.1	1.3e-12	54.1		FGFR2 ligand binding and activation	19	12	26.8	7.6e-19	176
CDK1	36	3.96048	0	0	0	N	0	0	0	Y	N	N	11	6	cyclin dependent kinase 1		Downstream signaling of activated FGFR2	30	4	13.1	1.4e-05	55.6		Gastrin-CREB signalling pathway via PKC and MAPK	18	5	17.4	1e-07	91.1		Insulin receptor signalling cascade	54	11	18.9	3e-13	47.6		Phospholipase C-mediated cascade: FGFR1	16	11	26.8	6.3e-18	224
CYB5R2	37	3.95072	0	0	0	N	0	0	0	Y	N	N	0	0	cytochrome b5 reductase 2		GAB1 signalosome	17	3	13.1	7.4e-05	75.7		Downstream signaling of activated FGFR4	27	6	17	1.9e-08	68.7		ESR-mediated signaling	161	19	18.5	1.4e-17	27.2		Signaling by Receptor Tyrosine Kinases	523	65	26.2	1.8e-50	21.2
EML4	38	3.94961	0	1	0	Y	1	0	0	Y	N	Y	1	0	echinoderm microtubule associated protein like 4		Downstream signaling of activated FGFR1	31	4	12.9	1.5e-05	53.5		Signaling by ALK	27	6	17	1.9e-08	68.7		Constitutive Signaling by Aberrant PI3K in Cancer	78	13	18.5	2.5e-14	38		PI-3K cascade:FGFR4	20	12	26.1	1.8e-18	154
IKZF5	39	3.94821	0	0	0	N	0	0	0	N	N	N	0	0	IKAROS family zinc finger 5		SHC-mediated cascade:FGFR3	18	3	12.7	8.5e-05	70.8		Signaling by FLT3 fusion proteins	19	5	16.9	1.3e-07	84.6		Downstream signaling of activated FGFR2	30	8	18.5	7.3e-11	65.5		Intracellular signaling by second messengers	308	48	25.5	7e-41	24.1
FOXP3	40	3.94032	0	0	0	N	0	0	0	Y	N	N	2	1	forkhead box P3		TP53 Regulates Transcription of Genes Involved in G2 Cell Cycle Arrest	18	3	12.7	8.5e-05	70.8		VEGFR2 mediated cell proliferation	19	5	16.9	1.3e-07	84.6		Downstream signaling of activated FGFR1	31	8	18.2	9.5e-11	62.7		Signaling by FGFR	88	25	25.5	5.8e-28	44.1
NRAS	41	3.93432	0	0	0	N	0	0	0	Y	N	N	8	1	NRAS proto-oncogene, GTPase		Signaling by EGFR	50	5	12.6	4e-06	41		FLT3 Signaling	38	7	16.6	4.1e-09	55.1		RET signaling	40	9	18	2.1e-11	52.8		Signaling by Insulin receptor	82	24	25.3	3.2e-27	45.8
CTNNB1	42	3.92655	0	0	0	N	0	0	0	Y	N	N	20	13	catenin beta 1		Signaling by Nuclear Receptors	236	11	12.4	1.2e-08	20.6		Signalling to RAS	20	5	16.4	1.7e-07	78.8		SHC-mediated cascade:FGFR3	18	6	18	5.8e-09	88		Signaling by PDGFRA transmembrane, juxtamembrane and kinase domain mutants	12	9	25.3	2.6e-15	301
KRAS	43	3.92259	0	0	0	N	0	0	0	Y	N	Y	213	42	KRAS proto-oncogene, GTPase		Insulin receptor signalling cascade	54	5	12.1	5.1e-06	37.7		ERBB2 Activates PTK6 Signaling	13	4	16.4	1.6e-06	104		Downregulation of ERBB2:ERBB3 signaling	13	5	17.7	6e-08	109		Negative regulation of FGFR3 signaling	29	14	25.2	1.1e-19	96.9
EP300	44	3.90817	0	0	0	N	0	0	0	N	N	N	42	26	E1A binding protein p300		Signaling by PTK6	54	5	12.1	5.1e-06	37.7		p38MAPK events	13	4	16.4	1.6e-06	104		ERBB2 Activates PTK6 Signaling	13	5	17.7	6e-08	109		SHC1 events in ERBB2 signaling	22	12	24.8	8.3e-18	123
GRK2	45	3.90638	0	0	0	N	0	0	0	N	N	N	20	3	G protein-coupled receptor kinase 2		Signaling by Type 1 Insulin-like Growth Factor 1 Receptor (IGF1R)	54	5	12.1	5.1e-06	37.7		Downregulation of ERBB2 signaling	29	6	16.3	2.9e-08	62.8		Negative regulation of the PI3K/AKT network	113	15	17.5	7.1e-15	29.8		Signaling by FGFR in disease	62	20	24.4	1.1e-23	51.3
MUC1	46	3.89745	0	0	0	N	0	0	0	N	N	N	3	0	mucin 1, cell surface associated		FRS-mediated FGFR3 signaling	20	3	12.1	0.00011	62.4		Downstream signaling of activated FGFR2	30	6	16	3.3e-08	60.1		Diseases of signal transduction by growth factor receptors and second messengers	428	30	17.4	2.3e-21	17.5		MAPK family signaling cascades	321	47	24.3	5.3e-39	22.2
HSP90AB1	47	3.89559	0	0	0	N	0	0	0	N	N	N	13	5	heat shock protein 90 alpha family class B member 1		Listeria monocytogenes entry into host cells	20	3	12.1	0.00011	62.4		Downstream signaling of activated FGFR1	31	6	15.8	3.8e-08	57.7		Extra-nuclear estrogen signaling	75	12	17.3	3.8e-13	35.8		Negative regulation of FGFR4 signaling	31	14	24.3	3.5e-19	85.5
TERF2	48	3.88501	0	0	0	N	0	0	0	N	N	N	14	3	telomeric repeat binding factor 2		SHC-mediated cascade:FGFR4	20	3	12.1	0.00011	62.4		Signaling by CSF1 (M-CSF) in myeloid cells	31	6	15.8	3.8e-08	57.7		Signaling by SCF-KIT	43	9	17.3	3.8e-11	48.2		GRB2 events in ERBB2 signaling	16	10	24.3	9.4e-16	168
PIK3CA	49	3.87791	0	0	0	N	0	0	0	N	N	Y	63	23	phosphatidylinositol-4,5-bisphosphate 3-kinase catalytic subunit alpha		Signalling to RAS	20	3	12.1	0.00011	62.4		Erythropoietin activates RAS	14	4	15.8	2.1e-06	93.4		G alpha (s) signalling events	149	17	17.2	1.4e-15	25.6		PI3K events in ERBB2 signaling	16	10	24.3	9.4e-16	168
CGA	50	3.87082	0	0	0	N	0	0	0	N	N	N	13	5	glycoprotein hormones, alpha polypeptide		CD209 (DC-SIGN) signaling	21	3	11.8	0.00012	59		Peptide hormone biosynthesis	14	4	15.8	2.1e-06	93.4		Signaling by Type 1 Insulin-like Growth Factor 1 Receptor (IGF1R)	54	10	17.1	1e-11	41.8		Downregulation of ERBB2:ERBB3 signaling	13	9	24.3	7.3e-15	226
DENND1B	51	3.87049	0	0	0	N	0	0	0	N	N	N	1	1	DENN domain containing 1B		SHC-mediated cascade:FGFR1	21	3	11.8	0.00012	59		ESR-mediated signaling	161	14	15.7	6.9e-13	25.8		Interleukin receptor SHC signaling	27	7	17.1	1.7e-09	62.4		FGFR2c ligand binding and activation	13	9	24.3	7.3e-15	226
TST	52	3.86626	0	0	0	N	0	0	0	N	N	N	0	0	thiosulfate sulfurtransferase		Signaling by FGFR1 in disease	37	4	11.7	2.6e-05	43.8		RAS processing	22	5	15.7	2.7e-07	69.7		Listeria monocytogenes entry into host cells	20	6	17.1	1.1e-08	75.6		Signaling by ERBB4	58	19	23.9	1.1e-22	52.2
DCN	53	3.86381	0	0	0	N	0	0	0	N	N	N	0	0	decorin		FLT3 Signaling	38	4	11.6	2.8e-05	42.5		Regulation of signaling by CBL	22	5	15.7	2.7e-07	69.7		SHC-mediated cascade:FGFR4	20	6	17.1	1.1e-08	75.6		Signaling by KIT in disease	20	11	23.9	2e-16	125
PAPSS1	54	3.85902	0	0	0	N	0	0	0	N	N	N	8	1	3'-phosphoadenosine 5'-phosphosulfate synthase 1		FRS-mediated FGFR4 signaling	22	3	11.5	0.00014	55.9		Signaling by SCF-KIT	43	7	15.6	9.7e-09	47.4		Signalling to RAS	20	6	17.1	1.1e-08	75.6		Signaling by FGFR1 in disease	37	15	23.8	1.2e-19	71.2
HRAS	55	3.85676	0	0	0	N	0	0	0	N	N	N	203	33	HRas proto-oncogene, GTPase		RUNX1 and FOXP3 control the development of regulatory T lymphocytes (Tregs)	10	2	11.4	0.001	86.6		DAP12 interactions	44	7	15.4	1.1e-08	46.2		Erythropoietin activates RAS	14	5	17.1	9e-08	96.9		Downregulation of ERBB2 signaling	29	13	23.3	8.1e-18	83.8
POMC	56	3.85228	0	0	0	N	0	0	0	N	N	N	1	0	proopiomelanocortin		Signal attenuation	10	2	11.4	0.001	86.6		Signaling by FGFR2	72	9	15.3	5.3e-10	35.9		PI3K/AKT Signaling in Cancer	105	14	17	4.2e-14	29.6		Signaling by Erythropoietin	25	12	23.2	6e-17	94.6
PIK3R2	57	3.84977	0	0	0	N	0	0	0	N	N	N	8	4	phosphoinositide-3-kinase regulatory subunit 2		STAT3 nuclear events downstream of ALK signaling	10	2	11.4	0.001	86.6		Signaling by PDGF	58	8	15.2	2.8e-09	39.6		FLT3 signaling in disease	28	7	16.8	2.2e-09	59.4		FGFR1 ligand binding and activation	18	10	22.9	4.4e-15	127
UBA52	58	3.84914	0	0	0	N	0	0	0	N	N	N	43	19	ubiquitin A-52 residue ribosomal protein fusion product 1		Signaling by FGFR3	40	4	11.3	3.2e-05	40.2		Degradation of cysteine and homocysteine	15	4	15.2	2.8e-06	85		Signaling by FGFR1 in disease	37	8	16.6	4.1e-10	49.7		Tie2 Signaling	18	10	22.9	4.4e-15	127
NRG1	59	3.84829	0	0	0	N	0	0	0	N	N	N	6	0	neuregulin 1		FRS-mediated FGFR1 signaling	23	3	11.2	0.00015	53		ERBB2 Regulates Cell Motility	15	4	15.2	2.8e-06	85		SHC-mediated cascade:FGFR1	21	6	16.6	1.5e-08	70.5		Phospholipase C-mediated cascade; FGFR4	15	9	22.6	4.7e-14	151
CBX5	60	3.84801	0	0	0	N	0	0	0	N	N	N	2	0	chromobox 5		Estrogen-dependent gene expression	90	6	11.1	3.4e-06	26.9		Signalling to ERKs	34	6	15	6.7e-08	51.5		Signaling by PDGF	58	10	16.5	2e-11	38.3		Signaling by CSF1 (M-CSF) in myeloid cells	31	13	22.5	2.2e-17	74.5
GPHB5	61	3.84786	0	0	0	N	0	0	0	N	N	N	0	0	glycoprotein hormone beta 5		Signaling by FGFR4	41	4	11.1	3.5e-05	39.1		Signaling by NTRKs	134	12	14.8	2e-11	25.8		Downregulation of ERBB2 signaling	29	7	16.5	2.7e-09	56.7		Hormone ligand-binding receptors	12	8	22.5	4.6e-13	200
GPHA2	62	3.84571	0	0	0	N	0	0	0	N	N	N	0	0	glycoprotein hormone alpha 2		Apoptotic cleavage of cell adhesion proteins	11	2	10.9	0.0012	76.9		Diseases of signal transduction by growth factor receptors and second messengers	428	22	14.7	1.7e-15	16.6		Degradation of cysteine and homocysteine	15	5	16.5	1.3e-07	87		Signaling by ALK	27	12	22.3	1.9e-16	82
MPST	63	3.84492	0	0	0	N	0	0	0	N	N	N	2	1	mercaptopyruvate sulfurtransferase		Transcriptional regulation by RUNX3	95	6	10.8	4e-06	25.4		Spry regulation of FGF signaling	16	4	14.7	3.5e-06	78.1		ERBB2 Regulates Cell Motility	15	5	16.5	1.3e-07	87		Signalling to RAS	20	10	21.7	1.7e-14	101
RPS27A	64	3.84163	0	0	0	N	0	0	0	N	N	Y	46	14	ribosomal protein S27a		Signaling by FGFR2 in disease	43	4	10.8	3.9e-05	37.1		Signaling by FGFR1 in disease	37	6	14.4	1.1e-07	46.6		Interleukin-3, Interleukin-5 and GM-CSF signaling	48	9	16.3	1e-10	42		FGFR3 ligand binding and activation	13	8	21.6	1.1e-12	160
TERF1	65	3.83591	0	0	0	N	0	0	0	N	N	N	10	1	telomeric repeat binding factor 1		Signaling by SCF-KIT	43	4	10.8	3.9e-05	37.1		GAB1 signalosome	17	4	14.3	4.5e-06	71.9		Signaling by FGFR2	72	11	16.2	6.7e-12	33.5		FGFRL1 modulation of FGFR1 signaling	13	8	21.6	1.1e-12	160
FSHB	66	3.83135	0	0	0	N	0	0	0	N	N	N	4	1	follicle stimulating hormone beta subunit		DAP12 interactions	44	4	10.7	4.2e-05	36.1		G alpha (s) signalling events	149	12	14	5.8e-11	22.9		Signal attenuation	10	4	16.2	1.4e-06	115		Downstream signal transduction	29	12	21.5	5.4e-16	72.4
ERBB2	67	3.83036	0	0	0	N	0	0	0	N	N	Y	31	14	erb-b2 receptor tyrosine kinase 2		FRS-mediated FGFR2 signaling	25	3	10.7	0.00019	48.2		RUNX3 regulates p14-ARF	10	3	14	3.9e-05	98.5		Signaling by NTRKs	134	15	16	5.4e-14	24.5		Signaling by NTRK2 (TRKB)	25	11	21.3	4.3e-15	80.1
CLTC	68	3.82935	0	0	0	N	0	0	0	N	N	N	6	0	clathrin heavy chain		Signaling by ALK	27	3	10.3	0.00024	44.2		Signaling by FGFR	88	9	13.8	2.9e-09	28.6		Signaling by FLT3 ITD and TKD mutants	16	5	15.9	1.8e-07	79.3		Signaling by NTRK3 (TRKC)	17	9	21.2	2.2e-13	113
TSHB	69	3.81984	0	0	0	N	0	0	0	N	N	N	0	0	thyroid stimulating hormone beta		IRS-mediated signalling	48	4	10.2	5.7e-05	32.8		Insulin receptor signalling cascade	54	7	13.8	3.6e-08	36.3		Signaling by Receptor Tyrosine Kinases	523	30	15.5	2.5e-19	14		Signaling by PTK6	54	16	20.8	1.9e-18	44.2
NPM1	70	3.81843	0	0	0	N	0	0	0	N	N	Y	4	2	nucleophosmin		Extra-nuclear estrogen signaling	75	5	10.1	2e-05	26.4		Signaling by Type 1 Insulin-like Growth Factor 1 Receptor (IGF1R)	54	7	13.8	3.6e-08	36.3		Activated NTRK2 signals through FRS2 and FRS3	11	4	15.4	2.1e-06	98.6		SHC1 events in ERBB4 signaling	14	8	20.8	2.4e-12	133
NPVF	71	3.81679	0	0	0	N	0	0	0	N	N	N	0	0	neuropeptide VF precursor		TP53 Regulates Transcription of Cell Cycle Genes	49	4	10.1	6.2e-05	32.1		SHC-mediated cascade:FGFR3	18	4	13.8	5.6e-06	66.8		Interleukin-2 family signaling	44	8	15.2	1.7e-09	40		ESR-mediated signaling	161	28	20.6	4.3e-25	23.8
SRC	72	3.81526	0	0	0	N	0	0	0	N	N	Y	62	14	SRC proto-oncogene, non-receptor tyrosine kinase		DNA Damage/Telomere Stress Induced Senescence	28	3	10.1	0.00026	42.5		Signaling by Receptor Tyrosine Kinases	523	23	13.7	3.7e-15	14.3		Signaling by Insulin receptor	82	11	15.1	2.5e-11	28.8		Regulation of signaling by CBL	22	10	20.6	5.6e-14	84.4
PLCG1	73	3.81339	0	0	0	N	0	0	0	N	N	N	5	0	phospholipase C gamma 1		Chk1/Chk2(Cds1) mediated inactivation of Cyclin B:Cdk1 complex	13	2	9.97	0.0016	63		Regulation of TP53 Activity through Methylation	19	4	13.5	6.9e-06	62.4		Signalling to ERKs	34	7	15.1	8.5e-09	46.2		Constitutive Signaling by Overexpressed ERBB2	11	7	20.5	2.5e-11	174
MADD	74	3.81227	0	0	0	N	0	0	0	N	N	N	0	0	MAP kinase activating death domain		ERBB2 Activates PTK6 Signaling	13	2	9.97	0.0016	63		SARS-CoV-1-host interactions	92	9	13.4	3.9e-09	27.2		Intracellular signaling by second messengers	308	22	15	5.1e-16	16.1		Signaling by activated point mutants of FGFR1	11	7	20.5	2.5e-11	174
YWHAB	75	3.80777	0	0	0	N	0	0	0	N	N	N	13	4	tyrosine 3-monooxygenase/tryptophan 5-monooxygenase activation protein beta		Formation of axial mesoderm	13	2	9.97	0.0016	63		Extra-nuclear estrogen signaling	75	8	13.3	1.7e-08	29.5		Signaling by Nuclear Receptors	236	19	15	7.1e-15	17.7		Signaling by FGFR4 in disease	11	7	20.5	2.5e-11	174
PIK3CD	76	3.8069	0	0	0	N	0	0	0	N	N	Y	13	3	phosphatidylinositol-4,5-bisphosphate 3-kinase catalytic subunit delta		p38MAPK events	13	2	9.97	0.0016	63		Negative regulation of MAPK pathway	43	6	13.3	2.5e-07	39		Gastrin-CREB signalling pathway via PKC and MAPK	18	5	15	3.5e-07	67.1		Signaling by EGFR	50	15	20.3	2e-17	44.8
NPPA	77	3.79887	0	0	0	N	0	0	0	N	N	N	2	0	natriuretic peptide A		Signaling by FGFR1	52	4	9.78	7.6e-05	30.1		Signaling by FGFR2 in disease	43	6	13.3	2.5e-07	39		Signaling by FLT3 fusion proteins	19	5	14.6	4.6e-07	62.3		FGFR2 mutant receptor activation	33	12	20.1	3.2e-15	58.6
RAB5B	78	3.79689	1	0	0	Y	1	0	0	N	N	N	1	0	RAB5B, member RAS oncogene family		Transcriptional regulation of granulopoiesis	30	3	9.75	0.00031	39.3		Transcriptional regulation by RUNX3	95	9	13.2	5e-09	26.2		VEGFR2 mediated cell proliferation	19	5	14.6	4.6e-07	62.3		Extra-nuclear estrogen signaling	75	18	19.7	6.9e-19	33.6
PIK3CB	79	3.78882	0	0	0	N	0	0	0	N	N	N	0	0	phosphatidylinositol-4,5-bisphosphate 3-kinase catalytic subunit beta		Signaling by Insulin receptor	82	5	9.65	2.7e-05	23.9		FRS-mediated FGFR3 signaling	20	4	13.1	8.3e-06	58.5		Signaling by FGFR	88	11	14.5	5e-11	26.5		RET signaling	40	13	19.7	1e-15	49.6
GNB1	80	3.78881	0	0	0	N	0	0	0	N	N	N	264	83	G protein subunit beta 1		Formation of definitive endoderm	14	2	9.59	0.0018	57.8		SHC-mediated cascade:FGFR4	20	4	13.1	8.3e-06	58.5		IRS-mediated signalling	48	8	14.5	3.3e-09	36		DAP12 signaling	29	11	19.7	2.8e-14	62.2
CYCS	81	3.78761	0	0	0	N	0	0	0	N	N	N	13	2	cytochrome c, somatic		PTK6 Regulates RHO GTPases, RAS GTPase and MAP kinases	14	2	9.59	0.0018	57.8		Constitutive Signaling by Aberrant PI3K in Cancer	78	8	13	2.1e-08	28.3		FCERI mediated MAPK activation	38	7	14.3	1.8e-08	40.2		Signaling by PDGFR in disease	20	9	19.5	1.3e-12	82.4
FHL2	82	3.78499	0	0	0	N	0	0	0	N	N	N	4	0	four and a half LIM domains 2		TP53 Regulates Transcription of Genes Involved in G1 Cell Cycle Arrest	14	2	9.59	0.0018	57.8		Signaling by MET	79	8	12.9	2.3e-08	27.9		FLT3 Signaling	38	7	14.3	1.8e-08	40.2		Interleukin-3, Interleukin-5 and GM-CSF signaling	48	14	19.3	4.1e-16	42.7
FANCC	83	3.77611	1	0	0	Y	1	0	0	N	N	N	0	0	Fanconi anemia complementation group C		Signaling by CSF1 (M-CSF) in myeloid cells	31	3	9.58	0.00034	37.9		CD209 (DC-SIGN) signaling	21	4	12.8	1e-05	55		FRS-mediated FGFR3 signaling	20	5	14.2	6e-07	58.2		FGFR1 mutant receptor activation	30	11	19.3	4.4e-14	59
ERBB4	84	3.76988	0	0	0	N	0	0	0	N	N	Y	10	4	erb-b2 receptor tyrosine kinase 4		Signaling by Receptor Tyrosine Kinases	523	13	9.31	1.1e-07	11.1		SHC-mediated cascade:FGFR1	21	4	12.8	1e-05	55		p38MAPK events	13	4	14.1	4.3e-06	76.8		Signaling by SCF-KIT	43	13	19	3e-15	44.7
GCG	85	3.76702	0	0	0	N	0	0	0	N	N	N	33	8	glucagon		Degradation of cysteine and homocysteine	15	2	9.25	0.002	53.3		Signaling by Nuclear Receptors	236	14	12.7	5.1e-11	17		Signaling by MET	79	10	13.9	3.8e-10	26.6		ERBB2 Activates PTK6 Signaling	13	7	18.8	1.2e-10	116
GNG2	86	3.76685	0	0	0	N	0	0	0	N	N	N	263	83	G protein subunit gamma 2		ERBB2 Regulates Cell Motility	15	2	9.25	0.002	53.3		RAF activation	33	5	12.7	2e-06	42.4		Signaling by CSF3 (G-CSF)	30	6	13.8	1.3e-07	44.1		Signaling by NTRKs	134	23	18.5	1.5e-20	22.7
LEF1	87	3.76477	0	0	0	N	0	0	0	N	N	N	0	0	lymphoid enhancer binding factor 1		TFAP2 (AP-2) family regulates transcription of growth factors and their receptors	15	2	9.25	0.002	53.3		ALK mutants bind TKIs	12	3	12.7	6.6e-05	76.9		Signaling by ALK in cancer	54	8	13.6	8.4e-09	31.3		Interleukin receptor SHC signaling	27	10	18.5	6.6e-13	59.6
PIK3R3	88	3.75081	0	0	0	N	0	0	0	N	N	N	0	0	phosphoinositide-3-kinase regulatory subunit 3		Signaling by PDGF	58	4	9.22	0.00011	26.8		IRS-mediated signalling	48	6	12.5	4.7e-07	34.4		Peptide hormone biosynthesis	14	4	13.6	5.5e-06	69.1		FLT3 signaling in disease	28	10	18.2	9.9e-13	56.3
SHC1	89	3.74932	0	0	0	N	0	0	0	N	N	N	7	4	SHC adaptor protein 1		Signalling to ERKs	34	3	9.12	0.00044	34.2		FRS-mediated FGFR4 signaling	22	4	12.5	1.2e-05	52		FRS-mediated FGFR4 signaling	22	5	13.5	9.7e-07	51.4		Signalling to ERKs	34	11	18.1	2.1e-13	48.7
FOXO1	90	3.74627	0	0	0	N	0	0	0	N	N	N	7	1	forkhead box O1		SARS-CoV-1-host interactions	92	5	9.05	3.9e-05	21.2		FRS-mediated FGFR1 signaling	23	4	12.2	1.4e-05	49.2		RAS processing	22	5	13.5	9.7e-07	51.4		FGFR1c ligand binding and activation	14	7	18.1	2.4e-10	99.5
APP	91	3.74579	0	0	0	N	0	0	0	N	N	Y	96	30	amyloid beta precursor protein		SARS-CoV-1 targets host intracellular signalling and regulatory pathways	16	2	8.95	0.0022	49.5		Chk1/Chk2(Cds1) mediated inactivation of Cyclin B:Cdk1 complex	13	3	12.2	8.5e-05	69.2		Role of LAT2/NTAL/LAB on calcium mobilization	22	5	13.5	9.7e-07	51.4		SHC1 events in EGFR signaling	14	7	18.1	2.4e-10	99.5
STAT3	92	3.74418	0	0	0	N	0	0	0	N	N	N	4	2	signal transducer and activator of transcription 3		Signaling by NTRKs	134	6	8.9	2e-05	17.6		Zygotic genome activation (ZGA)	13	3	12.2	8.5e-05	69.2		Signaling by FGFR2 in disease	43	7	13.4	4.3e-08	34.7		Activated NTRK2 signals through FRS2 and FRS3	11	6	17.6	3e-09	119
SQOR	93	3.74217	0	0	0	N	0	0	0	N	N	N	7	7	sulfide quinone oxidoreductase		Signaling by FGFR in disease	62	4	8.89	0.00013	24.9		Negative regulation of the PI3K/AKT network	113	9	12	1.9e-08	21.7		MAPK family signaling cascades	321	20	13.2	7.7e-14	13.6		MET activates RAS signaling	11	6	17.6	3e-09	119
INS	94	3.74198	0	0	0	N	0	0	0	N	N	N	291	148	insulin		RUNX1 regulates genes involved in megakaryocyte differentiation and platelet function	36	3	8.84	0.00051	32.2		Bacterial Infection Pathways	70	7	12	1.9e-07	27.1		FRS-mediated FGFR1 signaling	23	5	13.2	1.2e-06	48.5		Signaling by CSF3 (G-CSF)	30	10	17.5	2.1e-12	50.6
GPHN	95	3.73589	0	0	0	N	0	0	0	N	N	N	1	0	gephyrin		Regulation of TP53 Expression and Degradation	37	3	8.71	0.00054	31.2		Regulation of TP53 Expression and Degradation	37	5	11.9	3.4e-06	37.1		Glucagon-type ligand receptors	33	6	13.1	2.4e-07	39.2		ERBB2 Regulates Cell Motility	15	7	17.5	4.4e-10	87
SIN3B	96	3.73309	0	0	0	N	0	0	0	N	N	N	0	0	SIN3 transcription regulator family member B		Signaling by cytosolic FGFR1 fusion mutants	17	2	8.67	0.0025	46.2		Signaling by ALK in cancer	54	6	11.8	9.2e-07	30.1		Spry regulation of FGF signaling	16	4	12.7	9.2e-06	57.6		FLT3 Signaling	38	11	17	8.3e-13	41.5
MUC4	97	3.73264	0	0	0	N	0	0	0	N	N	N	0	0	mucin 4, cell surface associated		FCERI mediated MAPK activation	38	3	8.59	0.00058	30.3		PTK6 Regulates RHO GTPases, RAS GTPase and MAP kinases	14	3	11.8	0.0001	62.9		Transcriptional regulation by RUNX3	95	10	12.6	2.2e-09	21.6		Signaling by FLT3 ITD and TKD mutants	16	7	16.9	7.6e-10	77.4
PLCG2	98	3.73145	0	0	0	N	0	0	0	N	N	N	3	2	phospholipase C gamma 2		Transcriptional regulation by the AP-2 (TFAP2) family of transcription factors	38	3	8.59	0.00058	30.3		Intracellular signaling by second messengers	308	15	11.7	1.2e-10	14		Signaling by FGFR in disease	62	8	12.6	2.3e-08	26.7		Signaling by Nuclear Receptors	236	28	16.6	1.5e-20	15.2
GIP	99	3.72526	0	0	0	N	0	0	0	N	N	N	8	0	gastric inhibitory polypeptide		Activation of SMO	18	2	8.41	0.0027	43.3		FCERI mediated MAPK activation	38	5	11.7	3.8e-06	35.9		FRS-mediated FGFR2 signaling	25	5	12.6	1.8e-06	43.6		GAB1 signalosome	17	7	16.4	1.2e-09	69.8
FGF9	100	3.72201	0	0	0	N	0	0	0	N	N	N	3	3	fibroblast growth factor 9		PI-3K cascade:FGFR3	18	2	8.41	0.0027	43.3		Transcriptional regulation by the AP-2 (TFAP2) family of transcription factors	38	5	11.7	3.8e-06	35.9		Fc epsilon receptor (FCERI) signaling	137	12	12.4	3.3e-10	18		Transcriptional regulation by RUNX3	95	17	16.3	1.1e-15	23
ABL1	101	3.71897	0	0	0	N	0	0	0	N	N	Y	73	28	ABL proto-oncogene 1, non-receptor tyrosine kinase		G alpha (s) signalling events	149	6	8.38	2.9e-05	15.8		FRS-mediated FGFR2 signaling	25	4	11.7	1.9e-05	44.6		GAB1 signalosome	17	4	12.3	1.2e-05	53.1		Formation of axial mesoderm	13	6	16.1	1.1e-08	84.8
PIK3R1	102	3.70388	0	0	0	N	0	0	0	N	N	N	65	19	phosphoinositide-3-kinase regulatory subunit 1		Bacterial Infection Pathways	70	4	8.32	0.00019	21.9		MAPK family signaling cascades	321	15	11.4	2e-10	13.4		Signaling by GPCR	683	28	12.1	9.1e-15	9.49		Signaling by MET	79	15	15.8	2.5e-14	24.5
JAK2	103	3.70216	0	0	0	N	0	0	0	N	N	Y	128	40	Janus kinase 2		Signaling by FGFR2	72	4	8.19	0.00021	21.2		MAP2K and MAPK activation	40	5	11.4	4.8e-06	33.9		PI3K events in ERBB4 signaling	10	3	12.1	8.6e-05	73.3		DAP12 interactions	44	11	15.7	4.5e-12	34
MYC	104	3.70004	0	0	0	N	0	0	0	N	N	N	10	4	MYC proto-oncogene, bHLH transcription factor		Regulation of TP53 Activity through Methylation	19	2	8.17	0.003	40.8		RET signaling	40	5	11.4	4.8e-06	33.9		RUNX3 regulates p14-ARF	10	3	12.1	8.6e-05	73.3		Interleukin-2 family signaling	44	11	15.7	4.5e-12	34
APPL1	105	3.69516	0	0	0	N	0	0	0	N	N	N	8	5	adaptor protein, phosphotyrosine interacting with PH domain and leucine zipper 1		VEGFR2 mediated cell proliferation	19	2	8.17	0.003	40.8		InlB-mediated entry of Listeria monocytogenes into host cell	15	3	11.3	0.00012	57.6		STAT3 nuclear events downstream of ALK signaling	10	3	12.1	8.6e-05	73.3		Erythropoietin activates RAS	14	6	15.5	1.8e-08	74.2
NGF	106	3.68414	0	0	0	N	0	0	0	N	N	N	8	2	nerve growth factor		Negative regulation of the PI3K/AKT network	113	5	8.06	9e-05	17		TFAP2 (AP-2) family regulates transcription of growth factors and their receptors	15	3	11.3	0.00012	57.6		Sulfur amino acid metabolism	28	5	11.9	3.2e-06	37.9		PI3K events in ERBB4 signaling	10	5	15.3	1.3e-07	98.3
VIP	107	3.68195	0	0	0	N	0	0	0	N	N	N	2	0	vasoactive intestinal peptide		SUMOylation of transcription cofactors	43	3	8.03	0.0008	26.5		PI3K/AKT Signaling in Cancer	105	8	11	1.6e-07	20.4		Peptide hormone metabolism	88	9	11.8	2e-08	20.7		RUNX3 regulates p14-ARF	10	5	15.3	1.3e-07	98.3
CHD4	108	3.67968	0	0	0	N	0	0	0	N	N	N	10	2	chromodomain helicase DNA binding protein 4		PI-3K cascade:FGFR4	20	2	7.95	0.0032	38.5		Signaling by VEGF	106	8	11	1.7e-07	20.2		Negative regulation of FGFR3 signaling	29	5	11.6	3.8e-06	36.4		G alpha (s) signalling events	149	20	15	7.5e-16	16.6
GAK	109	3.66856	0	0	0	N	0	0	0	N	N	N	7	2	cyclin G associated kinase		Ras activation upon Ca2+ influx through NMDA receptor	20	2	7.95	0.0032	38.5		Signaling by Insulin receptor	82	7	11	5.3e-07	22.7		Nuclear events stimulated by ALK signaling in cancer	19	4	11.6	1.8e-05	46		Listeria monocytogenes entry into host cells	20	7	15	4.7e-09	53.6
JAK1	110	3.66694	0	0	0	N	0	0	0	N	N	Y	48	5	Janus kinase 1		Signaling by Hippo	20	2	7.95	0.0032	38.5		DNA Damage/Telomere Stress Induced Senescence	28	4	11	2.9e-05	39		Regulation of TP53 Activity through Methylation	19	4	11.6	1.8e-05	46		Signaling by PDGF	58	12	14.8	4.5e-12	26.7
AKT1	111	3.65746	0	0	0	N	0	0	0	N	N	N	35	7	AKT serine/threonine kinase 1		Signaling by GPCR	683	13	7.85	1.4e-06	8.4		Sulfur amino acid metabolism	28	4	11	2.9e-05	39		SARS-CoV-1-host interactions	92	9	11.5	2.8e-08	19.7		Spry regulation of FGF signaling	16	6	14.4	4.3e-08	59.3
EGF	112	3.65612	0	0	0	N	0	0	0	N	N	N	11	1	epidermal growth factor		Diseases of signal transduction by growth factor receptors and second messengers	428	10	7.83	4.7e-06	9.73		SARS-CoV-1 targets host intracellular signalling and regulatory pathways	16	3	11	0.00015	53.2		Negative regulation of MAPK pathway	43	6	11.4	1.1e-06	28.6		RAS processing	22	7	14.3	9.9e-09	46.4
NTRK1	113	3.65002	0	0	0	N	0	0	0	N	N	Y	53	36	neurotrophic receptor tyrosine kinase 1		Constitutive Signaling by Aberrant PI3K in Cancer	78	4	7.83	0.00028	19.5		VLDLR internalisation and degradation	16	3	11	0.00015	53.2		Transcriptional regulation of granulopoiesis	30	5	11.4	4.3e-06	34.9		Signaling by ALK in cancer	54	11	14.1	4.7e-11	26.1
HDAC2	114	3.64747	0	0	0	N	0	0	0	N	N	Y	27	0	histone deacetylase 2		Signaling by MET	79	4	7.78	0.00029	19.2		Signaling by FGFR in disease	62	6	10.9	2e-06	25.8		Negative regulation of FGFR4 signaling	31	5	11.2	5.1e-06	33.6		FOXO-mediated transcription	65	12	13.9	1.9e-11	23.2
ZNF576	115	3.64685	0	0	0	N	0	0	0	N	N	N	0	0	zinc finger protein 576		PI-3K cascade:FGFR1	21	2	7.75	0.0034	36.5		Signaling by moderate kinase activity BRAF mutants	44	5	10.9	7.5e-06	30.4		CD209 (DC-SIGN) signaling	21	4	11	2.6e-05	40.6		Erythropoietin activates Phosphoinositide-3-kinase (PI3K)	12	5	13.9	3.7e-07	70.4
CCNB1	116	3.6459	0	0	0	N	0	0	0	N	N	N	10	6	cyclin B1		HIV Transcription Initiation	47	3	7.65	0.001	24.1		Fc epsilon receptor (FCERI) signaling	137	9	10.8	8.1e-08	17.6		ALK mutants bind TKIs	12	3	11	0.00014	57		Signaling by VEGF	106	15	13.4	2e-12	17.2
S100A10	117	3.64411	0	0	0	N	0	0	0	N	N	N	7	3	S100 calcium binding protein A10		RAS processing	22	2	7.56	0.0036	34.7		SARS-CoV-1 Infection	137	9	10.8	8.1e-08	17.6		Erythropoietin activates Phosphoinositide-3-kinase (PI3K)	12	3	11	0.00014	57		Chk1/Chk2(Cds1) mediated inactivation of Cyclin B:Cdk1 complex	13	5	13.3	5.7e-07	61.4
RELA	118	3.63481	0	0	0	N	0	0	0	N	N	N	5	3	RELA proto-oncogene, NF-kB subunit		Regulation of signaling by CBL	22	2	7.56	0.0036	34.7		Negative regulation of FGFR3 signaling	29	4	10.8	3.2e-05	37.4		CD28 co-stimulation	33	5	10.9	6.6e-06	31.2		NF-kB is activated and signals survival	13	5	13.3	5.7e-07	61.4
PARP10	119	3.62736	0	0	0	N	0	0	0	N	N	N	4	0	poly(ADP-ribose) polymerase family member 10		Role of LAT2/NTAL/LAB on calcium mobilization	22	2	7.56	0.0036	34.7		Signaling by BRAF and RAF1 fusions	64	6	10.7	2.3e-06	24.9		Negative regulation of FGFR1 signaling	33	5	10.9	6.6e-06	31.2		Fc epsilon receptor (FCERI) signaling	137	17	13.2	4.9e-13	14.9
CALM1	120	3.59382	0	0	0	N	0	0	0	Y	N	Y	0	0	calmodulin 1		Pre-NOTCH Expression and Processing	49	3	7.48	0.0011	23.1		Signaling by CSF3 (G-CSF)	30	4	10.6	3.7e-05	36		RAF activation	33	5	10.9	6.6e-06	31.2		Regulation of TP53 Activity through Methylation	19	6	13.2	1.3e-07	45.7
CREBBP	121	3.59377	0	0	0	N	0	0	0	N	N	N	115	75	CREB binding protein		Signaling by NOTCH3	49	3	7.48	0.0011	23.1		Signaling by GPCR	683	21	10.5	3.5e-11	9.4		Negative regulation of FGFR2 signaling	34	5	10.7	7.5e-06	30.1		Signaling by FLT3 fusion proteins	19	6	13.2	1.3e-07	45.7
ESR1	122	3.59156	0	0	0	N	0	0	0	N	P4	N	307	291	estrogen receptor 1		Intracellular signaling by second messengers	308	8	7.46	2.2e-05	10.4		Interleukin-3, Interleukin-5 and GM-CSF signaling	48	5	10.4	1.1e-05	27.6		Role of phospholipids in phagocytosis	34	5	10.7	7.5e-06	30.1		VEGFR2 mediated cell proliferation	19	6	13.2	1.3e-07	45.7
TAF8	123	3.5915	0	0	0	N	0	0	0	N	N	N	16	1	TATA-box binding protein associated factor 8		PI-3K cascade:FGFR2	23	2	7.38	0.0039	33		EGFR downregulation	31	4	10.4	4.1e-05	34.7		Signaling by VEGF	106	9	10.6	9.2e-08	16.9		SARS-CoV-1-host interactions	92	13	12.5	7.3e-11	16.9
CUL3	124	3.5904	0	0	0	N	0	0	0	N	N	N	6	4	cullin 3		Telomere Extension By Telomerase	23	2	7.38	0.0039	33		Negative regulation of FGFR4 signaling	31	4	10.4	4.1e-05	34.7		GPVI-mediated activation cascade	35	5	10.5	8.7e-06	29.1		CD209 (DC-SIGN) signaling	21	6	12.5	2.5e-07	39.6
HSP90AA1	125	3.589	0	0	0	N	0	0	0	N	N	N	305	184	heat shock protein 90 alpha family class A member 1		Signaling by FGFR	88	4	7.32	0.00043	17.2		Regulation of NF-kappa B signaling	18	3	10.3	0.00021	46.2		Chk1/Chk2(Cds1) mediated inactivation of Cyclin B:Cdk1 complex	13	3	10.5	0.00018	51.4		Regulation of TP53 Expression and Degradation	37	8	12.4	1.9e-08	27.6
APPL2	126	3.57882	0	0	0	N	0	0	0	N	N	N	2	2	adaptor protein, phosphotyrosine interacting with PH domain and leucine zipper 2		SARS-CoV-1 Infection	137	5	7.22	0.00019	13.9		TP53 Regulates Transcription of Genes Involved in G2 Cell Cycle Arrest	18	3	10.3	0.00021	46.2		Formation of axial mesoderm	13	3	10.5	0.00018	51.4		Degradation of cysteine and homocysteine	15	5	12.4	1.3e-06	49.2
RUNX3	127	3.57625	0	0	0	N	0	0	0	N	N	N	0	0	runt related transcription factor 3		Infectious disease	898	14	7.11	3.1e-06	6.95		Signaling by NOTCH3	49	5	10.2	1.2e-05	27		Zygotic genome activation (ZGA)	13	3	10.5	0.00018	51.4		RNA Polymerase II Transcription	1284	56	12.3	4.2e-20	5.98
RAB5A	128	3.57624	0	0	0	N	0	0	0	N	N	N	13	4	RAB5A, member RAS oncogene family		Mitotic G2-G2/M phases	198	6	7.09	0.00011	11.7		TP53 Regulates Transcription of Cell Cycle Genes	49	5	10.2	1.2e-05	27		G alpha (q) signalling events	215	13	10.4	4.1e-09	12.2		FOXO-mediated transcription of oxidative stress, metabolic and neuronal genes	29	7	12.3	7.4e-08	31.7
MDM2	129	3.57532	0	0	0	N	0	0	0	N	N	N	122	90	MDM2 proto-oncogene		Signaling by ALK in cancer	54	3	7.09	0.0014	20.8		CD28 co-stimulation	33	4	10.1	5.1e-05	32.3		Bacterial Infection Pathways	70	7	10.2	1.1e-06	19.8		Interleukin-4 and Interleukin-13 signaling	110	14	12.2	5e-11	15.1
FGF18	130	3.57503	0	0	0	N	0	0	0	N	N	N	1	0	fibroblast growth factor 18		Cyclin A/B1/B2 associated events during G2/M transition	25	2	7.06	0.0045	30.1		Negative regulation of FGFR1 signaling	33	4	10.1	5.1e-05	32.3		Regulation of TP53 Expression and Degradation	37	5	10.2	1.1e-05	27.3		Bacterial Infection Pathways	70	11	12.2	8.6e-10	19
JUN	131	3.57286	0	0	0	N	0	0	0	N	N	N	8	1	Jun proto-oncogene, AP-1 transcription factor subunit		Defective Intrinsic Pathway for Apoptosis	25	2	7.06	0.0045	30.1		Nuclear events stimulated by ALK signaling in cancer	19	3	10	0.00024	43.3		Incretin synthesis, secretion, and inactivation	24	4	10.2	4.4e-05	34.6		NOTCH1 Intracellular Domain Regulates Transcription	48	9	12.2	7.8e-09	23.2
FGF2	132	3.57201	0	0	0	N	0	0	0	N	N	N	22	3	fibroblast growth factor 2		NOTCH3 Intracellular Domain Regulates Transcription	25	2	7.06	0.0045	30.1		Negative regulation of FGFR2 signaling	34	4	9.89	5.7e-05	31.2		C-type lectin receptors (CLRs)	140	10	10.1	7.6e-08	14.1		FCERI mediated MAPK activation	38	8	12.2	2.3e-08	26.7
SMAD3	133	3.56869	0	0	0	N	0	0	0	N	N	N	9	2	SMAD family member 3		Attenuation phase	27	2	6.77	0.005	27.7		Metalloprotease DUBs	20	3	9.75	0.00028	40.7		Transcriptional regulation by the AP-2 (TFAP2) family of transcription factors	38	5	10.1	1.3e-05	26.4		Transcriptional regulation by the AP-2 (TFAP2) family of transcription factors	38	8	12.2	2.3e-08	26.7
FGF3	134	3.56768	0	0	0	N	0	0	0	N	N	N	0	0	fibroblast growth factor 3		G0 and Early G1	27	2	6.77	0.005	27.7		Ras activation upon Ca2+ influx through NMDA receptor	20	3	9.75	0.00028	40.7		Interleukin-15 signaling	14	3	10.1	0.00022	46.6		Role of LAT2/NTAL/LAB on calcium mobilization	22	6	12.2	3.3e-07	37.1
BRCA1	135	3.56668	0	0	0	N	0	0	0	N	N	N	29	11	BRCA1, DNA repair associated		Interleukin receptor SHC signaling	27	2	6.77	0.005	27.7		Signaling by Hippo	20	3	9.75	0.00028	40.7		PTK6 Regulates RHO GTPases, RAS GTPase and MAP kinases	14	3	10.1	0.00022	46.6		MAPK3 (ERK1) activation	10	4	12.2	7.6e-06	65.1
YWHAQ	136	3.56638	0	0	0	N	0	0	0	N	N	N	9	0	tyrosine 3-monooxygenase/tryptophan 5-monooxygenase activation protein theta		G alpha (q) signalling events	215	6	6.74	0.00015	10.7		Negative regulation of MET activity	21	3	9.5	0.00032	38.4		Fcgamma receptor (FCGR) dependent phagocytosis	95	8	9.92	5.9e-07	16.5		Signal attenuation	10	4	12.2	7.6e-06	65.1
DOK5	137	3.5638	0	1	0	Y	1	0	0	N	N	N	1	0	docking protein 5		G2/M DNA damage checkpoint	60	3	6.68	0.0018	18.6		Oncogenic MAPK signaling	80	6	9.47	7.6e-06	19.5		Cell surface interactions at the vascular wall	146	10	9.85	1.1e-07	13.5		STAT3 nuclear events downstream of ALK signaling	10	4	12.2	7.6e-06	65.1
RIN1	138	3.56286	0	0	0	N	0	0	0	N	N	N	0	0	Ras and Rab interactor 1		B-WICH complex positively regulates rRNA expression	28	2	6.64	0.0053	26.7		C-type lectin receptors (CLRs)	140	8	9.37	1.3e-06	14.9		MAP2K and MAPK activation	40	5	9.78	1.6e-05	24.9		Infectious disease	898	45	12.1	3.8e-18	6.47
FGF17	139	3.55491	0	0	0	N	0	0	0	N	N	N	0	0	fibroblast growth factor 17		CREB1 phosphorylation through NMDA receptor-mediated activation of RAS signaling	28	2	6.64	0.0053	26.7		Ovarian tumor domain proteases	38	4	9.31	8.5e-05	27.5		Cytokine Signaling in Immune system	770	25	9.77	2.9e-11	7.11		Cytokine Signaling in Immune system	770	41	12.1	2.2e-17	6.75
H4C6	140	3.55045	0	0	0	N	0	0	0	N	N	N	0	0	NA		Sulfur amino acid metabolism	28	2	6.64	0.0053	26.7		SARS-CoV-1 activates/modulates innate immune responses	38	4	9.31	8.5e-05	27.5		InlB-mediated entry of Listeria monocytogenes into host cell	15	3	9.76	0.00027	42.8		p75NTR signals via NF-kB	16	5	12	1.7e-06	44.7
FGF6	141	3.54962	0	0	0	N	0	0	0	N	N	N	0	0	fibroblast growth factor 6		Regulation of TP53 Activity	159	5	6.61	0.00035	11.9		Chaperone Mediated Autophagy	22	3	9.27	0.00036	36.4		TFAP2 (AP-2) family regulates transcription of growth factors and their receptors	15	3	9.76	0.00027	42.8		SARS-CoV-1 targets host intracellular signalling and regulatory pathways	16	5	12	1.7e-06	44.7
FGF20	142	3.54904	0	0	0	N	0	0	0	N	N	N	1	0	fibroblast growth factor 20		PI3K/AKT Signaling in Cancer	105	4	6.61	0.00078	14.3		Role of LAT2/NTAL/LAB on calcium mobilization	22	3	9.27	0.00036	36.4		Deactivation of the beta-catenin transactivating complex	41	5	9.65	1.8e-05	24.2		Interleukin-7 signaling	23	6	11.9	4.3e-07	34.9
PAX5	143	3.54678	0	0	0	N	0	0	0	N	N	N	2	0	paired box 5		Signaling by VEGF	106	4	6.58	0.00079	14.1		IRAK2 mediated activation of TAK1 complex	10	2	9.26	0.002	56.9		Developmental Biology	1156	31	9.53	6.7e-12	6.19		Signaling by Interleukins	459	30	11.8	5.3e-15	7.89
RANBP2	144	3.54562	0	0	0	N	0	0	0	N	N	N	29	4	RAN binding protein 2		Downregulation of ERBB2 signaling	29	2	6.52	0.0056	25.7		PI3K events in ERBB4 signaling	10	2	9.26	0.002	56.9		SARS-CoV-1 targets host intracellular signalling and regulatory pathways	16	3	9.43	0.00032	39.5		SARS-CoV Infections	414	28	11.7	2.2e-14	8.09
ELAVL1	145	3.54396	0	0	0	N	0	0	0	N	N	N	10	1	ELAV like RNA binding protein 1		Regulation of TP53 Activity through Acetylation	29	2	6.52	0.0056	25.7		Recognition and association of DNA glycosylase with site containing an affected purine	10	2	9.26	0.002	56.9		VLDLR internalisation and degradation	16	3	9.43	0.00032	39.5		Estrogen-dependent gene expression	90	12	11.6	8.8e-10	15.7
H3C13	146	3.54292	0	0	0	N	0	0	0	N	N	N	20	6	NA		Maternal to zygotic transition (MZT)	63	3	6.5	0.002	17.7		RUNX1 and FOXP3 control the development of regulatory T lymphocytes (Tregs)	10	2	9.26	0.002	56.9		DNA Damage/Telomere Stress Induced Senescence	28	4	9.41	8e-05	28.8		Interleukin-27 signaling	11	4	11.6	1.1e-05	55.9
FGF22	147	3.53673	0	0	0	N	0	0	0	N	N	N	0	0	fibroblast growth factor 22		NCAM signaling for neurite out-growth	63	3	6.5	0.002	17.7		Signal attenuation	10	2	9.26	0.002	56.9		Signaling by moderate kinase activity BRAF mutants	44	5	9.28	2.5e-05	22.4		Interleukin-6 signaling	11	4	11.6	1.1e-05	55.9
KITLG	148	3.535	0	0	0	N	0	0	0	N	N	N	3	0	KIT ligand		RNA Polymerase II Transcription	1284	16	6.47	5.1e-06	5.72		STAT3 nuclear events downstream of ALK signaling	10	2	9.26	0.002	56.9		FOXO-mediated transcription of oxidative stress, metabolic and neuronal genes	29	4	9.23	9e-05	27.7		Developmental Biology	1156	50	11.5	1.2e-17	5.68
FGF16	149	3.53272	0	0	0	N	0	0	0	N	N	N	0	0	fibroblast growth factor 16		Activation of BH3-only proteins	30	2	6.4	0.0058	24.8		Thyroxine biosynthesis	10	2	9.26	0.002	56.9		GPER1 signaling	45	5	9.16	2.7e-05	21.8		SARS-CoV-1 Infection	137	15	11.5	7.8e-11	12.8
SHC4	150	3.53167	0	0	0	N	0	0	0	N	N	N	0	0	SHC adaptor protein 4		FGFR1 mutant receptor activation	30	2	6.4	0.0058	24.8		Cell surface interactions at the vascular wall	146	8	9.14	1.7e-06	14.3		Signaling by BRAF and RAF1 fusions	64	6	9.13	9.7e-06	18.2		CD28 co-stimulation	33	7	11.5	1.8e-07	26.8
CCT7	151	3.53042	0	0	0	N	0	0	0	N	N	N	13	2	chaperonin containing TCP1 subunit 7		HSF1 activation	30	2	6.4	0.0058	24.8		RHOU GTPase cycle	40	4	9.06	0.0001	26		Signaling by cytosolic FGFR1 fusion mutants	17	3	9.13	0.00037	36.7		Glucagon-type ligand receptors	33	7	11.5	1.8e-07	26.8
HSPA4	152	3.5298	0	0	0	N	0	0	0	N	N	N	0	0	heat shock protein family A (Hsp70) member 4		Signaling by CSF3 (G-CSF)	30	2	6.4	0.0058	24.8		Telomere Extension By Telomerase	23	3	9.05	0.00041	34.6		Nervous system development	576	20	9.11	1.5e-09	7.23		RAF activation	33	7	11.5	1.8e-07	26.8
SETDB2	153	3.52786	0	0	0	N	0	0	0	N	N	N	1	0	SET domain bifurcated 2		EGFR downregulation	31	2	6.28	0.0061	23.9		Deactivation of the beta-catenin transactivating complex	41	4	8.93	0.00011	25.3		SARS-CoV-1 Infection	137	9	9.11	7.6e-07	12.7		Signaling by NOTCH	176	17	11.4	2.5e-11	11.2
GNAQ	154	3.52632	0	0	0	N	0	0	0	N	N	N	8	2	G protein subunit alpha q		Formation of the beta-catenin:TCF transactivating complex	31	2	6.28	0.0061	23.9		NCAM signaling for neurite out-growth	63	5	8.92	3.6e-05	20.4		FGFR1 mutant receptor activation	30	4	9.06	0.0001	26.6		Inactivation of CSF3 (G-CSF) signaling	25	6	11.4	7.1e-07	31.3
HDAC5	155	3.52517	0	0	0	N	0	0	0	N	N	Y	0	0	histone deacetylase 5		RHO GTPases activate IQGAPs	31	2	6.28	0.0061	23.9		Estrogen-dependent gene expression	90	6	8.86	1.4e-05	17.1		FOXO-mediated transcription	65	6	9.05	1.1e-05	17.9		Hemostasis	608	34	11.3	5.2e-15	6.81
AXL	156	3.52344	0	0	0	N	0	0	0	N	N	Y	4	1	AXL receptor tyrosine kinase		Viral Infection Pathways	705	11	6.27	3.1e-05	6.5		APC/C:Cdc20 mediated degradation of Cyclin B	24	3	8.85	0.00046	33		EGFR downregulation	31	4	8.9	0.00011	25.6		Signaling by moderate kinase activity BRAF mutants	44	8	11.3	7.4e-08	22.2
SMAD2	157	3.52241	0	0	0	N	0	0	0	N	N	N	9	2	SMAD family member 2		Gastrulation	115	4	6.27	0.001	13		Alpha-protein kinase 1 signaling pathway	11	2	8.81	0.0023	50.6		Estrogen-dependent gene expression	90	7	8.86	5.4e-06	15		Signaling by GPCR	683	36	11.2	4.2e-15	6.46
FGF5	158	3.52196	0	0	0	N	0	0	0	N	N	N	0	0	fibroblast growth factor 5		MAPK family signaling cascades	321	7	6.24	0.00016	8.49		Androgen biosynthesis	11	2	8.81	0.0023	50.6		PI-3K cascade:FGFR3	18	3	8.85	0.00044	34.2		Gastrin-CREB signalling pathway via PKC and MAPK	18	5	11.2	3.2e-06	37.8
UBB	159	3.52083	0	0	0	N	0	0	0	N	N	N	185	73	ubiquitin B		Signaling by NOTCH	176	5	6.21	0.00053	10.7		Apoptotic cleavage of cell adhesion proteins	11	2	8.81	0.0023	50.6		Regulation of NF-kappa B signaling	18	3	8.85	0.00044	34.2		GPVI-mediated activation cascade	35	7	11.1	2.7e-07	24.9
FGF10	160	3.52011	0	0	0	N	0	0	0	N	N	N	1	1	fibroblast growth factor 10		Transcriptional regulation by RUNX1	177	5	6.19	0.00054	10.7		Pexophagy	11	2	8.81	0.0023	50.6		TP53 Regulates Transcription of Genes Involved in G2 Cell Cycle Arrest	18	3	8.85	0.00044	34.2		ALK mutants bind TKIs	12	4	11.1	1.6e-05	48.9
CANX	161	3.51756	0	0	0	N	0	0	0	N	N	N	0	0	calnexin		Transcription of the HIV genome	70	3	6.13	0.0025	15.8		Regulation of BACH1 activity	11	2	8.81	0.0023	50.6		RNA Polymerase II Transcription	1284	31	8.79	7.9e-11	5.52		Interleukin-35 Signalling	12	4	11.1	1.6e-05	48.9
SHC2	162	3.51741	0	0	0	N	0	0	0	N	N	N	0	0	SHC adaptor protein 2		CD28 co-stimulation	33	2	6.07	0.0067	22.4		TICAM1,TRAF6-dependent induction of TAK1 complex	11	2	8.81	0.0023	50.6		Hemostasis	608	20	8.77	3.6e-09	6.82		Regulation of localization of FOXO transcription factors	12	4	11.1	1.6e-05	48.9
PRKAA1	163	3.51208	0	0	0	N	0	0	0	N	N	N	11	4	protein kinase AMP-activated catalytic subunit alpha 1		Glucagon-type ligand receptors	33	2	6.07	0.0067	22.4		Infectious disease	898	21	8.72	3.3e-09	7		Signaling by the B Cell Receptor (BCR)	118	8	8.75	2.8e-06	13.1		SARS-CoV-2 targets host intracellular signalling and regulatory pathways	12	4	11.1	1.6e-05	48.9
PTPN11	164	3.51056	0	0	0	N	0	0	0	N	N	N	70	28	protein tyrosine phosphatase, non-receptor type 11		RAF activation	33	2	6.07	0.0067	22.4		SUMOylation of transcription cofactors	43	4	8.7	0.00013	24		Class B/2 (Secretin family receptors)	92	7	8.75	6.1e-06	14.7		Signaling by NOTCH1 PEST Domain Mutants in Cancer	58	9	10.9	4e-08	18.5
BDNF	165	3.50476	0	0	0	N	0	0	0	N	N	N	2	2	brain derived neurotrophic factor		Signaling by WNT in cancer	34	2	5.97	0.0071	21.7		Activation of NMDA receptors and postsynaptic events	93	6	8.69	1.6e-05	16.6		Nuclear signaling by ERBB4	32	4	8.75	0.00013	24.7		SMAD2/SMAD3:SMAD4 heterotrimer regulates transcription	36	7	10.9	3.3e-07	24
HDAC4	166	3.50119	0	0	0	N	0	0	0	N	N	Y	14	3	histone deacetylase 4		Developmental Biology	1156	14	5.89	2.7e-05	5.29		NOTCH3 Activation and Transmission of Signal to the Nucleus	25	3	8.65	0.00052	31.5		Infectious disease	898	25	8.74	6.4e-10	6.02		Nuclear events stimulated by ALK signaling in cancer	19	5	10.9	4.1e-06	35.1
SHH	167	3.50071	0	0	0	N	0	0	0	N	N	N	14	10	sonic hedgehog		RNA polymerase II transcribes snRNA genes	75	3	5.89	0.003	14.7		DNA Double Strand Break Response	44	4	8.6	0.00014	23.4		Signaling by NOTCH3	49	5	8.74	4.1e-05	19.8		Platelet activation, signaling and aggregation	258	20	10.8	1.9e-11	8.96
HGF	168	3.49998	0	0	0	N	0	0	0	N	N	N	36	3	hepatocyte growth factor		G2/M Checkpoints	133	4	5.75	0.0016	11.2		Fcgamma receptor (FCGR) dependent phagocytosis	95	6	8.59	1.8e-05	16.2		TP53 Regulates Transcription of Cell Cycle Genes	49	5	8.74	4.1e-05	19.8		Signaling by NOTCH3	49	8	10.6	1.6e-07	19.5
FGF8	169	3.49946	0	0	0	N	0	0	0	N	N	N	1	0	fibroblast growth factor 8		The role of GTSE1 in G2/M progression after G2 checkpoint	78	3	5.75	0.0032	14.1		Regulation of RAS by GAPs	68	5	8.54	5e-05	18.8		Antiviral mechanism by IFN-stimulated genes	148	9	8.7	1.4e-06	11.7		Metalloprotease DUBs	20	5	10.6	5.3e-06	32.8
RNF41	170	3.49768	0	0	0	N	0	0	0	N	N	N	2	0	ring finger protein 41		Ca-dependent events	37	2	5.7	0.0082	19.8		Nervous system development	576	16	8.52	3.6e-08	7.8		Activation of NMDA receptors and postsynaptic events	93	7	8.7	6.5e-06	14.5		p38MAPK events	13	4	10.6	2.2e-05	43.4
FN1	171	3.49712	0	0	0	N	0	0	0	N	N	Y	63	13	fibronectin 1		HSF1-dependent transactivation	37	2	5.7	0.0082	19.8		Josephin domain DUBs	12	2	8.42	0.0027	45.6		Glucagon signaling in metabolic regulation	33	4	8.6	0.00014	23.8		p75NTR recruits signalling complexes	13	4	10.6	2.2e-05	43.4
NRG2	172	3.49675	0	0	0	N	0	0	0	N	N	N	0	0	neuregulin 2		RUNX1 interacts with co-factors whose precise effect on RUNX1 targets is not known	37	2	5.7	0.0082	19.8		PECAM1 interactions	12	2	8.42	0.0027	45.6		Prostacyclin signalling through prostacyclin receptor	19	3	8.6	0.00051	32.1		Suppression of phagosomal maturation	13	4	10.6	2.2e-05	43.4
SHC3	173	3.4955	0	0	0	N	0	0	0	N	N	N	0	0	SHC adaptor protein 3		RNA Polymerase II Pre-transcription Events	80	3	5.67	0.0034	13.8		SARS-CoV-2 targets host intracellular signalling and regulatory pathways	12	2	8.42	0.0027	45.6		Amyloid fiber formation	52	5	8.45	5.3e-05	18.6		Zygotic genome activation (ZGA)	13	4	10.6	2.2e-05	43.4
TSHR	174	3.49491	0	0	0	N	0	0	0	N	N	Y	2	0	thyroid stimulating hormone receptor		Fc epsilon receptor (FCERI) signaling	137	4	5.64	0.0018	10.8		TICAM1-dependent activation of IRF3/IRF7	12	2	8.42	0.0027	45.6		Intrinsic Pathway for Apoptosis	53	5	8.36	5.8e-05	18.2		C-type lectin receptors (CLRs)	140	14	10.5	1.2e-09	11.5
IGF2	175	3.49053	0	0	0	N	0	0	0	N	N	N	11	2	insulin like growth factor 2		Apoptotic cleavage of cellular proteins	38	2	5.61	0.0085	19.3		G2/M Checkpoints	133	7	8.35	1e-05	13.5		Synthesis of PIPs at the plasma membrane	53	5	8.36	5.8e-05	18.2		Signaling by BRAF and RAF1 fusions	64	9	10.3	9.4e-08	16.5
																	Ovarian tumor domain proteases	38	2	5.61	0.0085	19.3		Interleukin receptor SHC signaling	27	3	8.3	0.00063	28.9		Metalloprotease DUBs	20	3	8.36	0.00058	30.2		Transcriptional regulation of granulopoiesis	30	6	10.3	2.1e-06	24.7
																	SARS-CoV-1 activates/modulates innate immune responses	38	2	5.61	0.0085	19.3		Cyclin D associated events in G1	47	4	8.29	0.00018	21.7		PI-3K cascade:FGFR4	20	3	8.36	0.00058	30.2		Negative regulation of MET activity	21	5	10.3	6.9e-06	30.8
																	C-type lectin receptors (CLRs)	140	4	5.57	0.0018	10.6		Transcriptional regulation by RUNX1	177	8	8.15	6.3e-06	11.6		Ras activation upon Ca2+ influx through NMDA receptor	20	3	8.36	0.00058	30.2		Transcriptional Regulation by TP53	359	23	10.2	2e-11	7.41
																	Transcriptional Regulation by VENTX	39	2	5.53	0.0089	18.7		CREB1 phosphorylation through NMDA receptor-mediated activation of RAS signaling	28	3	8.14	0.0007	27.7		Signaling by Hippo	20	3	8.36	0.00058	30.2		Fcgamma receptor (FCGR) dependent phagocytosis	95	11	10.2	2.1e-08	13.3
																	MAP2K and MAPK activation	40	2	5.45	0.0092	18.2		Cargo recognition for clathrin-mediated endocytosis	105	6	8.11	3e-05	14.5		GPCR ligand binding	450	16	8.25	6.8e-08	7.11		Deactivation of the beta-catenin transactivating complex	41	7	10.2	7.8e-07	20.5
																	RET signaling	40	2	5.45	0.0092	18.2		Formation of axial mesoderm	13	2	8.07	0.0031	41.4		RUNX1 regulates genes involved in megakaryocyte differentiation and platelet function	36	4	8.19	0.00019	21.6		Formation of definitive endoderm	14	4	10.2	3e-05	39.1
																	Cell surface interactions at the vascular wall	146	4	5.43	0.002	10.1		NF-kB is activated and signals survival	13	2	8.07	0.0031	41.4		Negative regulation of MET activity	21	3	8.14	0.00067	28.5		Interleukin-15 signaling	14	4	10.2	3e-05	39.1
																	DAG and IP3 signaling	41	2	5.38	0.0095	17.8		p75NTR recruits signalling complexes	13	2	8.07	0.0031	41.4		PI-3K cascade:FGFR1	21	3	8.14	0.00067	28.5		Peptide hormone biosynthesis	14	4	10.2	3e-05	39.1
																	Deactivation of the beta-catenin transactivating complex	41	2	5.38	0.0095	17.8		Suppression of phagosomal maturation	13	2	8.07	0.0031	41.4		Synthesis, secretion, and inactivation of Glucagon-like Peptide-1 (GLP-1)	21	3	8.14	0.00067	28.5		EGFR downregulation	31	6	10.1	2.5e-06	23.7
																	RAB GEFs exchange GTP for GDP on RABs	88	3	5.36	0.0042	12.5		Telomere C-strand synthesis initiation	13	2	8.07	0.0031	41.4		FCERI mediated Ca+2 mobilization	37	4	8.07	0.00021	20.9		Formation of the beta-catenin:TCF transactivating complex	31	6	10.1	2.5e-06	23.7
																	Cell-Cell communication	150	4	5.34	0.0022	9.85		TRAF6 mediated IRF7 activation in TLR7/8 or 9 signaling	13	2	8.07	0.0031	41.4		Oncogenic MAPK signaling	80	6	8.03	3.2e-05	14.3		CD28 dependent PI3K/Akt signaling	22	5	10.1	8.6e-06	28.9
																	SARS-CoV Infections	414	7	5.26	0.00062	6.51		Mitophagy	29	3	7.99	0.00077	26.6		Apoptosis	171	9	7.96	4.3e-06	10.1		Chaperone Mediated Autophagy	22	5	10.1	8.6e-06	28.9
																	Negative regulation of MAPK pathway	43	2	5.24	0.01	16.9		RNA Polymerase II Transcription	1284	24	7.93	9.8e-09	5.75		Leishmania infection	171	9	7.96	4.3e-06	10.1		Nuclear signaling by ERBB4	32	6	9.92	3e-06	22.8
																	Positive epigenetic regulation of rRNA expression	43	2	5.24	0.01	16.9		The role of GTSE1 in G2/M progression after G2 checkpoint	78	5	7.9	8.9e-05	16.2		IRAK2 mediated activation of TAK1 complex	10	2	7.96	0.0033	42.4		Negative regulation of MAPK pathway	43	7	9.9	1.1e-06	19.3
																	Class B/2 (Secretin family receptors)	92	3	5.22	0.0046	11.9		Activation of BH3-only proteins	30	3	7.84	0.00083	25.7		Recognition and association of DNA glycosylase with site containing an affected purine	10	2	7.96	0.0033	42.4		Signaling by the B Cell Receptor (BCR)	118	12	9.85	1.9e-08	11.6
																	Regulation of TP53 Activity through Phosphorylation	92	3	5.22	0.0046	11.9		Transcriptional regulation of granulopoiesis	30	3	7.84	0.00083	25.7		Regulation of FOXO transcriptional activity by acetylation	10	2	7.96	0.0033	42.4		Transcriptional regulation by RUNX1	177	15	9.84	2.8e-09	9.61
																	Activation of NMDA receptors and postsynaptic events	93	3	5.19	0.0047	11.8		Antiviral mechanism by IFN-stimulated genes	148	7	7.83	1.9e-05	12.1		RUNX1 and FOXP3 control the development of regulatory T lymphocytes (Tregs)	10	2	7.96	0.0033	42.4		Activation of BAD and translocation to mitochondria	15	4	9.82	3.9e-05	35.6
																	Diseases of programmed cell death	44	2	5.17	0.01	16.5		Formation of definitive endoderm	14	2	7.76	0.0034	37.9		Thyroxine biosynthesis	10	2	7.96	0.0033	42.4		InlB-mediated entry of Listeria monocytogenes into host cell	15	4	9.82	3.9e-05	35.6
																	DNA Double Strand Break Response	44	2	5.17	0.01	16.5		Glycogen synthesis	14	2	7.76	0.0034	37.9		Ovarian tumor domain proteases	38	4	7.95	0.00023	20.3		TFAP2 (AP-2) family regulates transcription of growth factors and their receptors	15	4	9.82	3.9e-05	35.6
																	Interleukin-2 family signaling	44	2	5.17	0.01	16.5		IRAK1 recruits IKK complex	14	2	7.76	0.0034	37.9		SARS-CoV-1 activates/modulates innate immune responses	38	4	7.95	0.00023	20.3		Viral Infection Pathways	705	33	9.78	1.8e-12	5.57
																	Signaling by moderate kinase activity BRAF mutants	44	2	5.17	0.01	16.5		Regulation of innate immune responses to cytosolic DNA	14	2	7.76	0.0034	37.9		CD28 dependent PI3K/Akt signaling	22	3	7.94	0.00075	27		DNA Double Strand Break Response	44	7	9.77	1.3e-06	18.8
																	Fcgamma receptor (FCGR) dependent phagocytosis	95	3	5.12	0.005	11.5		TP53 Regulates Transcription of Genes Involved in G1 Cell Cycle Arrest	14	2	7.76	0.0034	37.9		Chaperone Mediated Autophagy	22	3	7.94	0.00075	27		Transcriptional regulation by RUNX2	120	12	9.75	2.2e-08	11.4
																	Apoptotic execution phase	46	2	5.04	0.011	15.7		Downstream signaling events of B Cell Receptor (BCR)	81	5	7.73	0.0001	15.6		Nephrin family interactions	22	3	7.94	0.00075	27		Regulation of TP53 Activity	159	14	9.74	6.5e-09	9.97
																	Negative epigenetic regulation of rRNA expression	46	2	5.04	0.011	15.7		Developmental Biology	1156	22	7.68	3.3e-08	5.68		Transcriptional regulation by RUNX1	177	9	7.79	5.5e-06	9.69		APC/C:Cdc20 mediated degradation of Cyclin B	24	5	9.6	1.3e-05	25.9
																	Cellular response to heat stress	99	3	5	0.0054	11		Mitotic G2-G2/M phases	198	8	7.61	1.3e-05	10.3		Interleukin-7 signaling	23	3	7.75	0.00085	25.6		Role of phospholipids in phagocytosis	34	6	9.59	4.2e-06	21.2
																	Interleukin-3, Interleukin-5 and GM-CSF signaling	48	2	4.92	0.012	15.1		Regulation of RUNX3 expression and activity	55	4	7.59	0.00031	18.3		Long-term potentiation	23	3	7.75	0.00085	25.6		Signaling by NOTCH1	74	9	9.49	3.1e-07	13.9
																	Apoptosis	171	4	4.91	0.0033	8.6		Signaling by the B Cell Receptor (BCR)	118	6	7.57	5.4e-05	12.8		PI-3K cascade:FGFR2	23	3	7.75	0.00085	25.6		Germ layer formation at gastrulation	16	4	9.48	5.1e-05	32.6
																	Nervous system development	576	8	4.88	0.00079	5.4		Nuclear signaling by ERBB4	32	3	7.57	0.001	23.9		Telomere Extension By Telomerase	23	3	7.75	0.00085	25.6		NRIF signals cell death from the nucleus	16	4	9.48	5.1e-05	32.6
																	SUMOylation	173	4	4.88	0.0034	8.5		Metabolism of amino acids and derivatives	356	11	7.54	2.8e-06	8.13		RHOU GTPase cycle	40	4	7.73	0.00028	19.2		VLDLR internalisation and degradation	16	4	9.48	5.1e-05	32.6
																	Transcriptional Regulation by TP53	359	6	4.82	0.0016	6.31		Regulation of TP53 Activity	159	7	7.5	2.9e-05	11.2		Platelet activation, signaling and aggregation	258	11	7.7	2.1e-06	8.2		Cell surface interactions at the vascular wall	146	13	9.44	2.1e-08	10
																	Cargo recognition for clathrin-mediated endocytosis	105	3	4.82	0.0061	10.4		Transcriptional regulation by RUNX2	120	6	7.49	5.8e-05	12.6		Anti-inflammatory response favouring Leishmania parasite infection	86	6	7.7	4.7e-05	13.2		Cyclin D associated events in G1	47	7	9.41	1.9e-06	17.4
																	Extension of Telomeres	51	2	4.75	0.013	14.1		Activation of BAD and translocation to mitochondria	15	2	7.48	0.0038	35.1		Beta-catenin independent WNT signaling	146	8	7.69	1.1e-05	10.4		NOTCH3 Activation and Transmission of Signal to the Nucleus	25	5	9.38	1.6e-05	24.6
																	Hemostasis	608	8	4.68	0.0011	5.11		Glycogen storage diseases	15	2	7.48	0.0038	35.1		Ca2+ pathway	62	5	7.64	0.00012	15.3		Nervous system development	576	28	9.24	5.4e-11	5.64
																	Intrinsic Pathway for Apoptosis	53	2	4.64	0.014	13.6		GRB2:SOS provides linkage to MAPK signaling for Integrins	15	2	7.48	0.0038	35.1		RAB GEFs exchange GTP for GDP on RABs	88	6	7.59	5.3e-05	12.9		SUMOylation	173	14	9.23	1.8e-08	9.08
																	Cell Cycle, Mitotic	497	7	4.6	0.0016	5.38		Negative regulation of FLT3	15	2	7.48	0.0038	35.1		NCAM signaling for neurite out-growth	63	5	7.57	0.00012	15		Downregulation of TGF-beta receptor signaling	26	5	9.18	1.9e-05	23.4
																	G-protein mediated events	54	2	4.59	0.015	13.3		Signaling by NOTCH1 HD Domain Mutants in Cancer	15	2	7.48	0.0038	35.1		APC/C:Cdc20 mediated degradation of Cyclin B	24	3	7.57	0.00095	24.4		Activation of IRF3, IRF7 mediated by TBK1, IKBKE	17	4	9.18	6.4e-05	30.1
																	Cell Cycle	628	8	4.56	0.0013	4.94		Signal regulatory protein family interactions	15	2	7.48	0.0038	35.1		G-protein activation	24	3	7.57	0.00095	24.4		Signaling by cytosolic FGFR1 fusion mutants	17	4	9.18	6.4e-05	30.1
																	DNA Repair	286	5	4.53	0.0032	6.49		Oncogene Induced Senescence	33	3	7.44	0.0011	23.1		Alpha-protein kinase 1 signaling pathway	11	2	7.57	0.0038	37.6		SARS-CoV-2-host interactions	198	15	9.16	1.3e-08	8.49
																	Adherens junctions interactions	56	2	4.5	0.016	12.8		Signaling by NOTCH2	33	3	7.44	0.0011	23.1		Androgen biosynthesis	11	2	7.57	0.0038	37.6		Gastrulation	115	11	9.08	1.4e-07	10.7
																	Signaling by the B Cell Receptor (BCR)	118	3	4.48	0.0081	9.2		Viral Infection Pathways	705	16	7.4	4.7e-07	6.29		Apoptotic cleavage of cell adhesion proteins	11	2	7.57	0.0038	37.6		Oncogenic MAPK signaling	80	9	9.06	5.7e-07	12.7
																	SARS-CoV-2-host interactions	198	4	4.47	0.005	7.39		Peptide hormone metabolism	88	5	7.37	0.00015	14.3		Pexophagy	11	2	7.57	0.0038	37.6		eNOS activation	10	3	9.06	0.00029	41.7
																	Rab regulation of trafficking	120	3	4.43	0.0082	9.04		RAB GEFs exchange GTP for GDP on RABs	88	5	7.37	0.00015	14.3		Regulation of BACH1 activity	11	2	7.57	0.0038	37.6		IRAK2 mediated activation of TAK1 complex	10	3	9.06	0.00029	41.7
																	Transcriptional regulation by RUNX2	120	3	4.43	0.0082	9.04		Role of phospholipids in phagocytosis	34	3	7.32	0.0012	22.3		TICAM1,TRAF6-dependent induction of TAK1 complex	11	2	7.57	0.0038	37.6		Regulation of FOXO transcriptional activity by acetylation	10	3	9.06	0.00029	41.7
																	Meiosis	58	2	4.4	0.017	12.4		G alpha (q) signalling events	215	8	7.23	2.2e-05	9.49		Signaling by Interleukins	459	15	7.53	5.4e-07	6.43		Tetrahydrobiopterin (BH4) synthesis, recycling, salvage and regulation	10	3	9.06	0.00029	41.7
																	Programmed Cell Death	203	4	4.39	0.0053	7.2		G2/M DNA damage checkpoint	60	4	7.23	0.00042	16.7		Glucagon-like Peptide-1 (GLP1) regulates insulin secretion	42	4	7.52	0.00033	18.2		Ovarian tumor domain proteases	38	6	9	8e-06	18.5
																	Epigenetic regulation of gene expression	125	3	4.32	0.009	8.66		Assembly Of The HIV Virion	16	2	7.22	0.0042	32.5		TCR signaling	119	7	7.51	2.8e-05	11.1		SARS-CoV-1 activates/modulates innate immune responses	38	6	9	8e-06	18.5
																	Cellular Senescence	129	3	4.23	0.0096	8.39		MAP3K8 (TPL2)-dependent MAPK1/3 activation	16	2	7.22	0.0042	32.5		SUMOylation of transcription cofactors	43	4	7.42	0.00035	17.7		DDX58/IFIH1-mediated induction of interferon-alpha/beta	81	9	8.99	6.4e-07	12.6
																	Ca2+ pathway	62	2	4.23	0.018	11.5		NRIF signals cell death from the nucleus	16	2	7.22	0.0042	32.5		ADP signalling through P2Y purinoceptor 1	25	3	7.4	0.0011	23.3		Attenuation phase	27	5	8.99	2.3e-05	22.4
																	Cytosolic sensors of pathogen-associated DNA	62	2	4.23	0.018	11.5		p75NTR signals via NF-kB	16	2	7.22	0.0042	32.5		Defective Intrinsic Pathway for Apoptosis	25	3	7.4	0.0011	23.3		Integrin signaling	27	5	8.99	2.3e-05	22.4
																	Signaling by BRAF and RAF1 fusions	64	2	4.15	0.019	11.2		Regulation of KIT signaling	16	2	7.22	0.0042	32.5		Inactivation of CSF3 (G-CSF) signaling	25	3	7.4	0.0011	23.3		Transcriptional activity of SMAD2/SMAD3:SMAD4 heterotrimer	51	7	8.98	3.2e-06	15.8
																	DNA Double-Strand Break Repair	134	3	4.13	0.01	8.06		TGF-beta receptor signaling in EMT (epithelial to mesenchymal transition)	16	2	7.22	0.0042	32.5		NOTCH3 Activation and Transmission of Signal to the Nucleus	25	3	7.4	0.0011	23.3		Regulation of NF-kappa B signaling	18	4	8.89	7.9e-05	27.9
																	FOXO-mediated transcription	65	2	4.11	0.02	11		TRAF6-mediated induction of TAK1 complex within TLR4 complex	16	2	7.22	0.0042	32.5		DNA Double Strand Break Response	44	4	7.32	0.00038	17.3		TP53 Regulates Transcription of Genes Involved in G2 Cell Cycle Arrest	18	4	8.89	7.9e-05	27.9
																	Telomere Maintenance	65	2	4.11	0.02	11		Cellular Senescence	129	6	7.18	8.5e-05	11.7		TAK1-dependent IKK and NF-kappa-B activation	44	4	7.32	0.00038	17.3		Senescence-Associated Secretory Phenotype (SASP)	52	7	8.87	3.7e-06	15.5
																	GPCR ligand binding	450	6	4.08	0.0039	4.99		Regulation of TP53 Activity through Phosphorylation	92	5	7.18	0.00018	13.6		Regulation of RAS by GAPs	68	5	7.24	0.00017	13.8		Sulfur amino acid metabolism	28	5	8.81	2.7e-05	21.4
																	G1/S DNA Damage Checkpoints	67	2	4.04	0.021	10.7		Apoptosis	171	7	7.17	4.3e-05	10.4		Dectin-2 family	26	3	7.24	0.0012	22.3		Cellular response to chemical stress	211	15	8.78	2.8e-08	7.93
																	Innate Immune System	1047	10	4.02	0.002	3.77		Cytosolic sensors of pathogen-associated DNA	62	4	7.09	0.00048	16.1		Josephin domain DUBs	12	2	7.23	0.0044	33.9		Intrinsic Pathway for Apoptosis	53	7	8.78	4.1e-06	15.1
																	Formation of paraxial mesoderm	68	2	4	0.021	10.5		RUNX1 regulates genes involved in megakaryocyte differentiation and platelet function	36	3	7.09	0.0014	21		PECAM1 interactions	12	2	7.23	0.0044	33.9		Synthesis of PIPs at the plasma membrane	53	7	8.78	4.1e-06	15.1
																	Regulation of RAS by GAPs	68	2	4	0.021	10.5		SMAD2/SMAD3:SMAD4 heterotrimer regulates transcription	36	3	7.09	0.0014	21		Regulation of localization of FOXO transcription factors	12	2	7.23	0.0044	33.9		MAP2K and MAPK activation	40	6	8.74	1.1e-05	17.5
																	Cellular responses to stimuli	746	8	3.96	0.0031	4.12		Signaling by NOTCH	176	7	7.05	5.1e-05	10		SARS-CoV-2 targets host intracellular signalling and regulatory pathways	12	2	7.23	0.0044	33.9		G alpha (q) signalling events	215	15	8.67	3.6e-08	7.77
																	Costimulation by the CD28 family	70	2	3.93	0.022	10.2		Activation of IRF3, IRF7 mediated by TBK1, IKBKE	17	2	6.99	0.0046	30.4		TICAM1-dependent activation of IRF3/IRF7	12	2	7.23	0.0044	33.9		Signaling by WNT	268	17	8.66	1.6e-08	7.08
																	RUNX1 regulates transcription of genes involved in differentiation of HSCs	70	2	3.93	0.022	10.2		Base-Excision Repair, AP Site Formation	17	2	6.99	0.0046	30.4		Programmed Cell Death	203	9	7.14	1.5e-05	8.38		Regulation of TP53 Activity through Acetylation	29	5	8.64	3.1e-05	20.5
																	Clathrin-mediated endocytosis	145	3	3.92	0.012	7.44		Regulation of RUNX1 Expression and Activity	17	2	6.99	0.0046	30.4		Cellular Senescence	129	7	7.14	4.6e-05	10.2		Translation of SARS-CoV-1 Structural Proteins	29	5	8.64	3.1e-05	20.5
																	AURKA Activation by TPX2	71	2	3.9	0.023	10		Signaling by cytosolic FGFR1 fusion mutants	17	2	6.99	0.0046	30.4		Costimulation by the CD28 family	70	5	7.12	0.00019	13.4		KEAP1-NFE2L2 pathway	125	11	8.62	3.2e-07	9.8
																	Antiviral mechanism by IFN-stimulated genes	148	3	3.87	0.013	7.28		Translesion synthesis by POLK	17	2	6.99	0.0046	30.4		Neurotransmitter receptors and postsynaptic signal transmission	204	9	7.11	1.5e-05	8.34		Costimulation by the CD28 family	70	8	8.62	2.3e-06	12.9
																	HIV Life Cycle	148	3	3.87	0.013	7.28		Plasma lipoprotein clearance	37	3	6.98	0.0014	20.3		Integrin signaling	27	3	7.09	0.0013	21.4		Alpha-protein kinase 1 signaling pathway	11	3	8.61	0.00038	36.5
																	Metabolism of amino acids and derivatives	356	5	3.86	0.0064	5.17		Cytokine Signaling in Immune system	770	16	6.93	1.5e-06	5.72		Cyclin D associated events in G1	47	4	7.05	0.00048	16.1		NFE2L2 regulating tumorigenic genes	11	3	8.61	0.00038	36.5
																	Cytokine Signaling in Immune system	770	8	3.85	0.0036	3.98		FOXO-mediated transcription	65	4	6.9	0.00056	15.3		G2/M Checkpoints	133	7	7.01	5.5e-05	9.86		Pexophagy	11	3	8.61	0.00038	36.5
																	Signaling by Hedgehog	150	3	3.84	0.013	7.18		Cell Cycle	628	14	6.81	3.5e-06	6		CREB1 phosphorylation through NMDA receptor-mediated activation of RAS signaling	28	3	6.95	0.0014	20.5		Regulation of BACH1 activity	11	3	8.61	0.00038	36.5
																	Factors involved in megakaryocyte development and platelet production	154	3	3.77	0.014	6.99		SARS-CoV Infections	414	11	6.81	1e-05	6.93		NF-kB is activated and signals survival	13	2	6.92	0.005	30.8		Signaling by Leptin	11	3	8.61	0.00038	36.5
																	PKR-mediated signaling	75	2	3.77	0.025	9.48		G1/S DNA Damage Checkpoints	67	4	6.78	0.00062	14.8		p75NTR recruits signalling complexes	13	2	6.92	0.005	30.8		TICAM1,TRAF6-dependent induction of TAK1 complex	11	3	8.61	0.00038	36.5
																	Cell Cycle Checkpoints	256	4	3.73	0.01	5.67		Activation of SMO	18	2	6.78	0.0051	28.5		Repression of WNT target genes	13	2	6.92	0.005	30.8		Regulation of RUNX3 expression and activity	55	7	8.59	5.3e-06	14.5
																	RHO GTPase Effectors	262	4	3.67	0.011	5.54		Metabolism of amine-derived hormones	18	2	6.78	0.0051	28.5		Suppression of phagosomal maturation	13	2	6.92	0.005	30.8		Antiviral mechanism by IFN-stimulated genes	148	12	8.55	2e-07	9
																	Oncogenic MAPK signaling	80	2	3.62	0.028	8.87		PI-3K cascade:FGFR3	18	2	6.78	0.0051	28.5		Telomere C-strand synthesis initiation	13	2	6.92	0.005	30.8		Peptide hormone metabolism	88	9	8.55	1.3e-06	11.4
																	Recruitment of mitotic centrosome proteins and complexes	80	2	3.62	0.028	8.87		Transcriptional Regulation by TP53	359	10	6.7	1.9e-05	7.19		TRAF6 mediated IRF7 activation in TLR7/8 or 9 signaling	13	2	6.92	0.005	30.8		RAB GEFs exchange GTP for GDP on RABs	88	9	8.55	1.3e-06	11.4
																	Signaling by WNT	268	4	3.61	0.011	5.41		Clathrin-mediated endocytosis	145	6	6.68	0.00015	10.3		Metabolism of amino acids and derivatives	356	12	6.86	6.6e-06	6.46		Apoptosis	171	13	8.54	1.3e-07	8.43
																	DDX58/IFIH1-mediated induction of interferon-alpha/beta	81	2	3.59	0.028	8.76		Costimulation by the CD28 family	70	4	6.61	0.00072	14.2		PKR-mediated signaling	75	5	6.84	0.00026	12.5		Leishmania infection	171	13	8.54	1.3e-07	8.43
																	Downstream signaling events of B Cell Receptor (BCR)	81	2	3.59	0.028	8.76		RUNX1 regulates transcription of genes involved in differentiation of HSCs	70	4	6.61	0.00072	14.2		Cargo recognition for clathrin-mediated endocytosis	105	6	6.83	0.00013	10.7		Regulation of beta-cell development	42	6	8.5	1.4e-05	16.5
																	Leishmania infection	171	3	3.51	0.018	6.28		DAG and IP3 signaling	41	3	6.59	0.0019	18.2		Transcriptional Regulation by TP53	359	12	6.82	7e-06	6.4		Activation of BH3-only proteins	30	5	8.47	3.7e-05	19.7
																	Degradation of beta-catenin by the destruction complex	84	2	3.51	0.03	8.44		Processive synthesis on the C-strand of the telomere	19	2	6.58	0.0056	26.8		Mitophagy	29	3	6.82	0.0016	19.7		Cellular Senescence	129	11	8.45	4.3e-07	9.46
																	TP53 Regulates Metabolic Genes	84	2	3.51	0.03	8.44		TICAM1, RIP1-mediated IKK complex recruitment	19	2	6.58	0.0056	26.8		Signaling by WNT	268	10	6.71	1.8e-05	7.05		Ras activation upon Ca2+ influx through NMDA receptor	20	4	8.39	0.00012	24.5
																	TCF dependent signaling in response to WNT	172	3	3.49	0.018	6.24		Translesion Synthesis by POLH	19	2	6.58	0.0056	26.8		Activation of BH3-only proteins	30	3	6.69	0.0017	19		Class B/2 (Secretin family receptors)	92	9	8.32	1.8e-06	10.9
																	Hedgehog 'on' state	86	2	3.45	0.031	8.23		Selenoamino acid metabolism	107	5	6.56	0.00034	11.6		Regulation of insulin secretion	78	5	6.68	0.0003	11.9		Regulation of TP53 Activity through Phosphorylation	92	9	8.32	1.8e-06	10.9
																	Regulation of PLK1 Activity at G2/M Transition	86	2	3.45	0.031	8.23		SARS-CoV-2-host interactions	198	7	6.54	0.0001	8.87		The role of GTSE1 in G2/M progression after G2 checkpoint	78	5	6.68	0.0003	11.9		Downregulation of SMAD2/3:SMAD4 transcriptional activity	31	5	8.32	4.3e-05	18.9
																	Cell-cell junction organization	87	2	3.43	0.032	8.14		Cell-Cell communication	150	6	6.54	0.00018	9.97		Senescence-Associated Secretory Phenotype (SASP)	52	4	6.65	0.00068	14.4		Programmed Cell Death	203	14	8.31	1.3e-07	7.63
																	APC/C-mediated degradation of cell cycle proteins	88	2	3.4	0.032	8.04		ISG15 antiviral mechanism	72	4	6.5	0.0008	13.7		Formation of definitive endoderm	14	2	6.65	0.0056	28.2		G2/M Checkpoints	133	11	8.29	5.7e-07	9.15
																	Peptide hormone metabolism	88	2	3.4	0.032	8.04		Programmed Cell Death	203	7	6.44	0.00011	8.65		Glycogen synthesis	14	2	6.65	0.0056	28.2		TAK1-dependent IKK and NF-kappa-B activation	44	6	8.28	1.8e-05	15.6
																	SARS-CoV-2 Infection	291	4	3.39	0.014	4.97		GPCR ligand binding	450	11	6.43	2e-05	6.35		IRAK1 recruits IKK complex	14	2	6.65	0.0056	28.2		Activation of NMDA receptors and postsynaptic events	93	9	8.27	1.9e-06	10.8
																	Opioid Signalling	90	2	3.35	0.033	7.86		ER Quality Control Compartment (ERQC)	20	2	6.4	0.0061	25.3		Regulation of innate immune responses to cytosolic DNA	14	2	6.65	0.0056	28.2		Josephin domain DUBs	12	3	8.21	0.00049	32.4
																	Chromosome Maintenance	92	2	3.3	0.035	7.68		Inhibition of DNA recombination at telomere	20	2	6.4	0.0061	25.3		TP53 Regulates Transcription of Genes Involved in G1 Cell Cycle Arrest	14	2	6.65	0.0056	28.2		PECAM1 interactions	12	3	8.21	0.00049	32.4
																	Recruitment of NuMA to mitotic centrosomes	93	2	3.28	0.035	7.6		PI-3K cascade:FGFR4	20	2	6.4	0.0061	25.3		YAP1- and WWTR1 (TAZ)-stimulated gene expression	14	2	6.65	0.0056	28.2		TICAM1-dependent activation of IRF3/IRF7	12	3	8.21	0.00049	32.4
																	Anchoring of the basal body to the plasma membrane	95	2	3.24	0.036	7.43		Hemostasis	608	13	6.36	1.2e-05	5.66		Clathrin-mediated endocytosis	145	7	6.64	9.1e-05	9		SARS-CoV-2 Infection	291	17	8.18	4.8e-08	6.48
																	Reproduction	95	2	3.24	0.036	7.43		Interleukin-2 family signaling	44	3	6.33	0.0022	16.9		Formation of the beta-catenin:TCF transactivating complex	31	3	6.57	0.0019	18.3		GPER1 signaling	45	6	8.17	2e-05	15.2
																	Mitotic Prometaphase	201	3	3.12	0.026	5.32		TAK1-dependent IKK and NF-kappa-B activation	44	3	6.33	0.0022	16.9		DDX58/IFIH1-mediated induction of interferon-alpha/beta	81	5	6.53	0.00035	11.5		NPAS4 regulates expression of target genes	21	4	8.17	0.00014	23
																	Membrane Trafficking	624	6	3.09	0.014	3.55		Membrane Trafficking	624	13	6.23	1.6e-05	5.51		Downstream signaling events of B Cell Receptor (BCR)	81	5	6.53	0.00035	11.5		G2/M DNA damage checkpoint	60	7	8.16	9.1e-06	13.1
																	Neurotransmitter receptors and postsynaptic signal transmission	204	3	3.09	0.027	5.23		PI-3K cascade:FGFR1	21	2	6.23	0.0067	24		Innate Immune System	1047	22	6.52	1e-06	4.3		The role of GTSE1 in G2/M progression after G2 checkpoint	78	8	8.07	5e-06	11.4
																	Potential therapeutics for SARS	106	2	3.01	0.044	6.64		Regulation of FZD by ubiquitination	21	2	6.23	0.0067	24		Membrane Trafficking	624	16	6.5	4.3e-06	5.02		Oncogene Induced Senescence	33	5	8.03	5.8e-05	17.6
																	Selenoamino acid metabolism	107	2	2.99	0.045	6.58		TP53 regulates transcription of additional cell cycle genes whose exact role in the p53 pathway remain uncertain	21	2	6.23	0.0067	24		Cell-Cell communication	150	7	6.5	0.00011	8.68		Ca2+ pathway	62	7	8	1.1e-05	12.7
																	Signaling by Rho GTPases, Miro GTPases and RHOBTB3	649	6	2.98	0.016	3.4		TCR signaling	119	5	6.15	0.00053	10.4		PI Metabolism	82	5	6.48	0.00037	11.3		Cytosolic sensors of pathogen-associated DNA	62	7	8	1.1e-05	12.7
																	Interleukin-4 and Interleukin-13 signaling	110	2	2.93	0.047	6.39		Rab regulation of trafficking	120	5	6.12	0.00055	10.3		Thrombin signalling through proteinase activated receptors (PARs)	32	3	6.45	0.002	17.7		TCR signaling	119	10	7.98	1.7e-06	9.26
																	Vesicle-mediated transport	671	6	2.88	0.018	3.29		HIV Transcription Initiation	47	3	6.1	0.0026	15.7		Regulation of RUNX3 expression and activity	55	4	6.43	0.00083	13.5		Nephrin family interactions	22	4	7.96	0.00017	21.7
																	Hedgehog 'off' state	113	2	2.88	0.049	6.22		DDX58/IFIH1-mediated induction of interferon-alpha/beta	81	4	6.07	0.0012	12.1		Activation of BAD and translocation to mitochondria	15	2	6.4	0.0062	26.1		Downstream signaling events of B Cell Receptor (BCR)	81	8	7.89	6.5e-06	10.9
																	Cell junction organization	114	2	2.86	0.049	6.17		CD28 dependent PI3K/Akt signaling	22	2	6.07	0.0072	22.8		Glycogen storage diseases	15	2	6.4	0.0062	26.1		Loss of function of MECP2 in Rett syndrome	13	3	7.86	0.00062	29.2
																	HIV Infection	230	3	2.81	0.035	4.63		Cytosolic sulfonation of small molecules	22	2	6.07	0.0072	22.8		GRB2:SOS provides linkage to MAPK signaling for Integrins	15	2	6.4	0.0062	26.1		Repression of WNT target genes	13	3	7.86	0.00062	29.2
																	Deubiquitination	243	3	2.69	0.04	4.37		JNK (c-Jun kinases) phosphorylation and activation mediated by activated human TAK1	22	2	6.07	0.0072	22.8		Negative regulation of FLT3	15	2	6.4	0.0062	26.1		TRAF6 mediated IRF7 activation in TLR7/8 or 9 signaling	13	3	7.86	0.00062	29.2
																	Post-translational protein modification	1348	9	2.59	0.021	2.52		Nephrin family interactions	22	2	6.07	0.0072	22.8		Phospholipase C-mediated cascade; FGFR4	15	2	6.4	0.0062	26.1		Clathrin-mediated endocytosis	145	11	7.84	1.3e-06	8.32
																	Interferon Signaling	267	3	2.49	0.049	3.97		NOTCH2 Activation and Transmission of Signal to the Nucleus	22	2	6.07	0.0072	22.8		Signaling by NOTCH1 HD Domain Mutants in Cancer	15	2	6.4	0.0062	26.1		SARS-CoV-2 activates/modulates innate and adaptive immune responses	123	10	7.81	2.2e-06	8.93
																	Transmission across Chemical Synapses	268	3	2.48	0.049	3.96		PINK1-PRKN Mediated Mitophagy	22	2	6.07	0.0072	22.8		Signal regulatory protein family interactions	15	2	6.4	0.0062	26.1		Beta-catenin independent WNT signaling	146	11	7.8	1.4e-06	8.26
																								NOTCH1 Intracellular Domain Regulates Transcription	48	3	6.03	0.0027	15.4		Viral Infection Pathways	705	17	6.39	4.3e-06	4.75		TP53 Regulates Transcription of Cell Cycle Genes	49	6	7.77	3.1e-05	13.8
																								DNA Repair	286	8	6	0.00013	7.03		Degradation of beta-catenin by the destruction complex	84	5	6.38	0.00041	11		Long-term potentiation	23	4	7.76	0.0002	20.6
																								SUMOylation	173	6	5.98	0.00036	8.59		Nucleotide-binding domain, leucine rich repeat containing receptor (NLR) signaling pathways	56	4	6.37	0.00087	13.3		RAF-independent MAPK1/3 activation	23	4	7.76	0.0002	20.6
																								Pre-NOTCH Expression and Processing	49	3	5.96	0.0029	15		Oncogene Induced Senescence	33	3	6.34	0.0022	17.1		Response of Mtb to phagocytosis	23	4	7.76	0.0002	20.6
																								Degradation of beta-catenin by the destruction complex	84	4	5.93	0.0013	11.7		Signaling by NOTCH2	33	3	6.34	0.0022	17.1		RHOBTB2 GTPase cycle	23	4	7.76	0.0002	20.6
																								activated TAK1 mediates p38 MAPK activation	23	2	5.93	0.0075	21.7		Signal amplification	33	3	6.34	0.0022	17.1		TCF dependent signaling in response to WNT	172	12	7.75	9.5e-07	7.64
																								IKK complex recruitment mediated by RIP1	23	2	5.93	0.0075	21.7		Mitotic G2-G2/M phases	198	8	6.32	8.7e-05	7.53		Mitotic G1 phase and G1/S transition	149	11	7.7	1.7e-06	8.08
																								Long-term potentiation	23	2	5.93	0.0075	21.7		Rab regulation of trafficking	120	6	6.28	0.00025	9.25		Potential therapeutics for SARS	106	9	7.62	5.3e-06	9.31
																								PI-3K cascade:FGFR2	23	2	5.93	0.0075	21.7		Transcriptional regulation by RUNX2	120	6	6.28	0.00025	9.25		G-protein activation	24	4	7.58	0.00024	19.6
																								Response of Mtb to phagocytosis	23	2	5.93	0.0075	21.7		Regulation of TP53 Activity	159	7	6.26	0.00015	8.16		Incretin synthesis, secretion, and inactivation	24	4	7.58	0.00024	19.6
																								Vesicle-mediated transport	671	13	5.9	3.1e-05	5.1		Regulated Necrosis	58	4	6.24	0.00098	12.8		Interleukin-6 family signaling	24	4	7.58	0.00024	19.6
																								Hedgehog 'on' state	86	4	5.85	0.0014	11.4		Assembly Of The HIV Virion	16	2	6.18	0.0068	24.2		Regulation of RAS by GAPs	68	7	7.57	2e-05	11.4
																								Regulation of PLK1 Activity at G2/M Transition	86	4	5.85	0.0014	11.4		Defective GALNT3 causes HFTC	16	2	6.18	0.0068	24.2		Glycogen synthesis	14	3	7.55	0.00074	26.5
																								Extension of Telomeres	51	3	5.82	0.0031	14.4		FOXO-mediated transcription of cell death genes	16	2	6.18	0.0068	24.2		IRAK1 recruits IKK complex	14	3	7.55	0.00074	26.5
																								Transcriptional activity of SMAD2/SMAD3:SMAD4 heterotrimer	51	3	5.82	0.0031	14.4		Germ layer formation at gastrulation	16	2	6.18	0.0068	24.2		Metabolism of nitric oxide: NOS3 activation and regulation	14	3	7.55	0.00074	26.5
																								RUNX2 regulates osteoblast differentiation	24	2	5.79	0.0081	20.7		MAP3K8 (TPL2)-dependent MAPK1/3 activation	16	2	6.18	0.0068	24.2		Prolonged ERK activation events	14	3	7.55	0.00074	26.5
																								APC/C-mediated degradation of cell cycle proteins	88	4	5.77	0.0015	11.1		NRIF signals cell death from the nucleus	16	2	6.18	0.0068	24.2		PTK6 Regulates RHO GTPases, RAS GTPase and MAP kinases	14	3	7.55	0.00074	26.5
																								Senescence-Associated Secretory Phenotype (SASP)	52	3	5.75	0.0033	14.1		p75NTR signals via NF-kB	16	2	6.18	0.0068	24.2		Regulation of IFNG signaling	14	3	7.55	0.00074	26.5
																								DNA Double-Strand Break Repair	134	5	5.71	0.00086	9.15		Phospholipase C-mediated cascade: FGFR1	16	2	6.18	0.0068	24.2		Regulation of innate immune responses to cytosolic DNA	14	3	7.55	0.00074	26.5
																								Formation of TC-NER Pre-Incision Complex	53	3	5.69	0.0034	13.8		Regulation of KIT signaling	16	2	6.18	0.0068	24.2		Retrograde neurotrophin signalling	14	3	7.55	0.00074	26.5
																								Intrinsic Pathway for Apoptosis	53	3	5.69	0.0034	13.8		TGF-beta receptor signaling in EMT (epithelial to mesenchymal transition)	16	2	6.18	0.0068	24.2		RUNX3 regulates NOTCH signaling	14	3	7.55	0.00074	26.5
																								Calnexin/calreticulin cycle	25	2	5.66	0.0086	19.8		The NLRP3 inflammasome	16	2	6.18	0.0068	24.2		Cellular responses to stimuli	746	28	7.51	1.7e-08	4.26
																								Cyclin A/B1/B2 associated events during G2/M transition	25	2	5.66	0.0086	19.8		TRAF6-mediated induction of TAK1 complex within TLR4 complex	16	2	6.18	0.0068	24.2		FCERI mediated Ca+2 mobilization	37	5	7.51	9.7e-05	15.4
																								Defective Intrinsic Pathway for Apoptosis	25	2	5.66	0.0086	19.8		SARS-CoV Infections	414	12	6.15	2.6e-05	5.51		HSF1-dependent transactivation	37	5	7.51	9.7e-05	15.4
																								Gap-filling DNA repair synthesis and ligation in GG-NER	25	2	5.66	0.0086	19.8		Vesicle-mediated transport	671	16	6.13	9.6e-06	4.65		Amyloid fiber formation	52	6	7.5	4.3e-05	12.9
																								Glycogen metabolism	25	2	5.66	0.0086	19.8		Opioid Signalling	90	5	6.12	0.00055	10.2		Cell Cycle	628	25	7.44	3.8e-08	4.47
																								Inactivation of CSF3 (G-CSF) signaling	25	2	5.66	0.0086	19.8		G2/M DNA damage checkpoint	60	4	6.11	0.0011	12.3		Antigen activates B Cell Receptor (BCR) leading to generation of second messengers	38	5	7.4	0.00011	14.9
																								NOTCH3 Intracellular Domain Regulates Transcription	25	2	5.66	0.0086	19.8		Cytoprotection by HMOX1	61	4	6.05	0.0012	12.1		ADP signalling through P2Y purinoceptor 1	25	4	7.4	0.00028	18.6
																								Chromosome Maintenance	92	4	5.62	0.0018	10.6		Regulation of TP53 Activity through Phosphorylation	92	5	6.04	0.00059	10		Calnexin/calreticulin cycle	25	4	7.4	0.00028	18.6
																								Class A/1 (Rhodopsin-like receptors)	320	8	5.55	0.00027	6.26		SMAD2/SMAD3:SMAD4 heterotrimer regulates transcription	36	3	6.03	0.0028	15.6		Defective Intrinsic Pathway for Apoptosis	25	4	7.4	0.00028	18.6
																								APC-Cdc20 mediated degradation of Nek2A	26	2	5.53	0.0092	19		Cytosolic sensors of pathogen-associated DNA	62	4	5.99	0.0012	11.9		Glycogen metabolism	25	4	7.4	0.00028	18.6
																								Downregulation of TGF-beta receptor signaling	26	2	5.53	0.0092	19		Activation of IRF3, IRF7 mediated by TBK1, IKBKE	17	2	5.98	0.0076	22.6		ISG15 antiviral mechanism	72	7	7.31	2.8e-05	10.7
																								Polymerase switching on the C-strand of the telomere	26	2	5.53	0.0092	19		Base-Excision Repair, AP Site Formation	17	2	5.98	0.0076	22.6		Platelet Aggregation (Plug Formation)	39	5	7.29	0.00012	14.5
																								Cell Cycle Checkpoints	256	7	5.52	0.00042	6.78		Defective C1GALT1C1 causes TNPS	17	2	5.98	0.0076	22.6		Glycogen storage diseases	15	3	7.27	0.00089	24.3
																								Nucleotide-binding domain, leucine rich repeat containing receptor (NLR) signaling pathways	56	3	5.51	0.0039	13		Regulation of RUNX1 Expression and Activity	17	2	5.98	0.0076	22.6		GRB2:SOS provides linkage to MAPK signaling for Integrins	15	3	7.27	0.00089	24.3
																								Stabilization of p53	56	3	5.51	0.0039	13		Translesion synthesis by POLK	17	2	5.98	0.0076	22.6		Negative regulation of FLT3	15	3	7.27	0.00089	24.3
																								TNF signaling	57	3	5.45	0.004	12.8		Interferon Signaling	267	9	5.93	0.00011	6.28		Signaling by NOTCH1 HD Domain Mutants in Cancer	15	3	7.27	0.00089	24.3
																								Attenuation phase	27	2	5.42	0.0097	18.2		Plasma lipoprotein clearance	37	3	5.93	0.003	15.1		Signal regulatory protein family interactions	15	3	7.27	0.00089	24.3
																								G0 and Early G1	27	2	5.42	0.0097	18.2		Adaptive Immune System	773	17	5.92	1.3e-05	4.3		Interleukin-20 family signaling	26	4	7.24	0.00032	17.8
																								Infection with Mycobacterium tuberculosis	27	2	5.42	0.0097	18.2		Transmission across Chemical Synapses	268	9	5.91	0.00011	6.25		RHOU GTPase cycle	40	5	7.18	0.00014	14.1
																								Integrin signaling	27	2	5.42	0.0097	18.2		Signaling by NOTCH	176	7	5.85	0.00027	7.33		Nucleotide-binding domain, leucine rich repeat containing receptor (NLR) signaling pathways	56	6	7.17	6.4e-05	11.9
																								Beta-catenin independent WNT signaling	146	5	5.41	0.0012	8.37		Antigen activates B Cell Receptor (BCR) leading to generation of second messengers	38	3	5.84	0.0033	14.7		Nuclear events mediated by NFE2L2	96	8	7.09	2.1e-05	9.07
																								Innate Immune System	1047	16	5.4	4.8e-05	4.11		Activation of SMO	18	2	5.79	0.0082	21.2		Infection with Mycobacterium tuberculosis	27	4	7.09	0.00037	17
																								Meiosis	58	3	5.4	0.0042	12.6		Metabolism of amine-derived hormones	18	2	5.79	0.0082	21.2		VEGFR2 mediated vascular permeability	27	4	7.09	0.00037	17
																								Regulated Necrosis	58	3	5.4	0.0042	12.6		Phospholipase C-mediated cascade; FGFR2	18	2	5.79	0.0082	21.2		Membrane Trafficking	624	24	7.08	1.4e-07	4.29
																								Signaling by NOTCH1 PEST Domain Mutants in Cancer	58	3	5.4	0.0042	12.6		Fanconi Anemia Pathway	39	3	5.76	0.0034	14.3		Vesicle-mediated transport	671	25	7.04	1.3e-07	4.16
																								Interferon Signaling	267	7	5.36	0.00053	6.49		Platelet Aggregation (Plug Formation)	39	3	5.76	0.0034	14.3		Rab regulation of trafficking	120	9	7.03	1.4e-05	8.13
																								Neurotransmitter receptors and postsynaptic signal transmission	204	6	5.36	0.0008	7.23		Transcriptional Regulation by VENTX	39	3	5.76	0.0034	14.3		Regulated Necrosis	58	6	7.02	7.7e-05	11.4
																								HIV Life Cycle	148	5	5.36	0.0013	8.25		G1/S DNA Damage Checkpoints	67	4	5.72	0.0016	11		Assembly Of The HIV Virion	16	3	7.01	0.0011	22.5
																								Signaling by WNT	268	7	5.35	0.00054	6.47		DNA Repair	286	9	5.64	0.00017	5.84		FOXO-mediated transcription of cell death genes	16	3	7.01	0.0011	22.5
																								Mitotic G1 phase and G1/S transition	149	5	5.34	0.0013	8.19		Processive synthesis on the C-strand of the telomere	19	2	5.62	0.009	19.9		MAP3K8 (TPL2)-dependent MAPK1/3 activation	16	3	7.01	0.0011	22.5
																								Signaling by Hedgehog	150	5	5.31	0.0014	8.13		Synthesis, secretion, and deacylation of Ghrelin	19	2	5.62	0.009	19.9		Regulation of KIT signaling	16	3	7.01	0.0011	22.5
																								Budding and maturation of HIV virion	28	2	5.31	0.01	17.5		TICAM1, RIP1-mediated IKK complex recruitment	19	2	5.62	0.009	19.9		TGF-beta receptor signaling in EMT (epithelial to mesenchymal transition)	16	3	7.01	0.0011	22.5
																								B-WICH complex positively regulates rRNA expression	28	2	5.31	0.01	17.5		Translesion Synthesis by POLH	19	2	5.62	0.009	19.9		The NLRP3 inflammasome	16	3	7.01	0.0011	22.5
																								Cell Cycle, Mitotic	497	10	5.3	0.00022	5.11		DAG and IP3 signaling	41	3	5.59	0.0038	13.5		TRAF6-mediated induction of TAK1 complex within TLR4 complex	16	3	7.01	0.0011	22.5
																								SCF(Skp2)-mediated degradation of p27/p21	60	3	5.29	0.0045	12.1		RUNX1 regulates transcription of genes involved in differentiation of HSCs	70	4	5.57	0.0018	10.5		Cellular response to heat stress	99	8	6.95	2.6e-05	8.77
																								Adaptive Immune System	773	13	5.26	0.00012	4.39		Regulation of beta-cell development	42	3	5.51	0.004	13.2		CREB1 phosphorylation through NMDA receptor-mediated activation of RAS signaling	28	4	6.94	0.00041	16.3
																								Influenza Infection	154	5	5.22	0.0015	7.91		Selenoamino acid metabolism	107	5	5.49	0.0011	8.53		DNA Damage/Telomere Stress Induced Senescence	28	4	6.94	0.00041	16.3
																								FOXO-mediated transcription of oxidative stress, metabolic and neuronal genes	29	2	5.2	0.011	16.9		ISG15 antiviral mechanism	72	4	5.47	0.002	10.1		Notch-HLH transcription pathway	28	4	6.94	0.00041	16.3
																								Regulation of TP53 Activity through Acetylation	29	2	5.2	0.011	16.9		Integration of energy metabolism	108	5	5.46	0.0011	8.45		Neurotransmitter receptors and postsynaptic signal transmission	204	12	6.89	5e-06	6.35
																								Translation of SARS-CoV-1 Structural Proteins	29	2	5.2	0.011	16.9		ER Quality Control Compartment (ERQC)	20	2	5.46	0.0099	18.8		SUMOylation of transcription cofactors	43	5	6.88	0.00019	12.9
																								Maternal to zygotic transition (MZT)	63	3	5.14	0.0051	11.5		G beta:gamma signalling through CDC42	20	2	5.46	0.0099	18.8		Interferon Signaling	267	14	6.86	2.8e-06	5.68
																								Processing of DNA double-strand break ends	63	3	5.14	0.0051	11.5		Inhibition of DNA recombination at telomere	20	2	5.46	0.0099	18.8		Mitophagy	29	4	6.8	0.00047	15.7
																								FGFR1 mutant receptor activation	30	2	5.1	0.012	16.3		ADORA2B mediated anti-inflammatory cytokines production	43	3	5.44	0.0043	12.8		GPCR ligand binding	450	19	6.78	9e-07	4.62
																								HSF1 activation	30	2	5.1	0.012	16.3		Vasopressin regulates renal water homeostasis via Aquaporins	43	3	5.44	0.0043	12.8		FOXO-mediated transcription of cell cycle genes	17	3	6.78	0.0013	20.8
																								Recognition of DNA damage by PCNA-containing replication complex	30	2	5.1	0.012	16.3		Cell Cycle	628	14	5.41	7.8e-05	4.25		Regulation of RUNX1 Expression and Activity	17	3	6.78	0.0013	20.8
																								Synthesis of active ubiquitin: roles of E1 and E2 enzymes	30	2	5.1	0.012	16.3		SARS-CoV-2-host interactions	198	7	5.4	0.0005	6.48		Translesion synthesis by POLK	17	3	6.78	0.0013	20.8
																								Oxidative Stress Induced Senescence	64	3	5.09	0.0052	11.3		Interleukin-4 and Interleukin-13 signaling	110	5	5.39	0.0012	8.28		PI Metabolism	82	7	6.73	6.1e-05	9.27
																								SARS-CoV-2 Infection	291	7	5.04	0.00083	5.94		Diseases of programmed cell death	44	3	5.36	0.0045	12.5		Signaling by NOTCH4	82	7	6.73	6.1e-05	9.27
																								Dual incision in TC-NER	65	3	5.04	0.0054	11.2		Inflammasomes	21	2	5.31	0.011	17.8		Cargo recognition for clathrin-mediated endocytosis	105	8	6.69	3.8e-05	8.23
																								Telomere Maintenance	65	3	5.04	0.0054	11.2		Presynaptic function of Kainate receptors	21	2	5.31	0.011	17.8		HSF1 activation	30	4	6.67	0.00053	15
																								Activated NOTCH1 Transmits Signal to the Nucleus	31	2	5.01	0.012	15.7		Regulation of FZD by ubiquitination	21	2	5.31	0.011	17.8		Degradation of beta-catenin by the destruction complex	84	7	6.63	7e-05	9.03
																								Downregulation of SMAD2/3:SMAD4 transcriptional activity	31	2	5.01	0.012	15.7		Regulation of gene expression in beta cells	21	2	5.31	0.011	17.8		TP53 Regulates Metabolic Genes	84	7	6.63	7e-05	9.03
																								Endosomal Sorting Complex Required For Transport (ESCRT)	31	2	5.01	0.012	15.7		TP53 regulates transcription of additional cell cycle genes whose exact role in the p53 pathway remain uncertain	21	2	5.31	0.011	17.8		Oxidative Stress Induced Senescence	64	6	6.61	0.00013	10.2
																								Formation of the beta-catenin:TCF transactivating complex	31	2	5.01	0.012	15.7		Gastrulation	115	5	5.24	0.0015	7.91		MyD88-independent TLR4 cascade	108	8	6.57	4.6e-05	7.98
																								RHO GTPases activate IQGAPs	31	2	5.01	0.012	15.7		Negative epigenetic regulation of rRNA expression	46	3	5.22	0.005	11.9		Adaptive Immune System	773	26	6.56	4.5e-07	3.74
																								RUNX2 regulates bone development	31	2	5.01	0.012	15.7		Class A/1 (Rhodopsin-like receptors)	320	9	5.19	0.00036	5.19		Activation of SMO	18	3	6.56	0.0015	19.4
																								HIV Infection	230	6	4.94	0.0014	6.38		ADP signalling through P2Y purinoceptor 12	22	2	5.17	0.011	16.9		RUNX2 regulates bone development	31	4	6.54	0.0006	14.5
																								Hedgehog 'off' state	113	4	4.94	0.0033	8.56		Cytosolic sulfonation of small molecules	22	2	5.17	0.011	16.9		Anti-inflammatory response favouring Leishmania parasite infection	86	7	6.53	7.9e-05	8.8
																								RIPK1-mediated regulated necrosis	32	2	4.92	0.013	15.2		JNK (c-Jun kinases) phosphorylation and activation mediated by activated human TAK1	22	2	5.17	0.011	16.9		Hedgehog 'on' state	86	7	6.53	7.9e-05	8.8
																								Termination of translesion DNA synthesis	32	2	4.92	0.013	15.2		NOTCH2 Activation and Transmission of Signal to the Nucleus	22	2	5.17	0.011	16.9		Regulation of PLK1 Activity at G2/M Transition	86	7	6.53	7.9e-05	8.8
																								Circadian Clock	68	3	4.9	0.0061	10.6		PINK1-PRKN Mediated Mitophagy	22	2	5.17	0.011	16.9		TGF-beta receptor signaling activates SMADs	47	5	6.52	0.00028	11.7
																								Gastrulation	115	4	4.88	0.0035	8.4		Cellular response to chemical stress	211	7	5.16	0.00071	6.06		Cell Cycle Checkpoints	256	13	6.45	8.9e-06	5.46
																								Leishmania infection	171	5	4.87	0.0023	7.1		FCGR3A-mediated IL10 synthesis	47	3	5.15	0.0052	11.7		G1/S DNA Damage Checkpoints	67	6	6.42	0.00017	9.72
																								Diseases of metabolism	236	6	4.85	0.0015	6.21		HIV Transcription Initiation	47	3	5.15	0.0052	11.7		RIPK1-mediated regulated necrosis	32	4	6.42	0.00067	14
																								TCF dependent signaling in response to WNT	172	5	4.85	0.0023	7.05		Cellular responses to stimuli	746	15	5.12	0.00012	3.84		Thrombin signalling through proteinase activated receptors (PARs)	32	4	6.42	0.00067	14
																								Diseases of carbohydrate metabolism	33	2	4.83	0.013	14.7		G alpha (z) signalling events	48	3	5.09	0.0055	11.4		Innate Immune System	1047	31	6.37	4.2e-07	3.34
																								Glucagon-type ligand receptors	33	2	4.83	0.013	14.7		NOTCH1 Intracellular Domain Regulates Transcription	48	3	5.09	0.0055	11.4		PTEN Regulation	139	9	6.37	4e-05	6.93
																								Meiotic synapsis	33	2	4.83	0.013	14.7		activated TAK1 mediates p38 MAPK activation	23	2	5.04	0.012	16.1		Pre-NOTCH Expression and Processing	49	5	6.36	0.00034	11.2
																								Metabolism of steroid hormones	33	2	4.83	0.013	14.7		IKK complex recruitment mediated by RIP1	23	2	5.04	0.012	16.1		Metabolism of cofactors	19	3	6.36	0.0017	18.2
																								TNFR1-induced NF-kappa-B signaling pathway	33	2	4.83	0.013	14.7		Response of Mtb to phagocytosis	23	2	5.04	0.012	16.1		Prostacyclin signalling through prostacyclin receptor	19	3	6.36	0.0017	18.2
																								Transcription of the HIV genome	70	3	4.82	0.0065	10.3		Termination of O-glycan biosynthesis	23	2	5.04	0.012	16.1		TICAM1, RIP1-mediated IKK complex recruitment	19	3	6.36	0.0017	18.2
																								Orc1 removal from chromatin	71	3	4.78	0.0067	10.2		Pre-NOTCH Expression and Processing	49	3	5.03	0.0057	11.1		Translesion Synthesis by POLH	19	3	6.36	0.0017	18.2
																								Late endosomal microautophagy	34	2	4.75	0.014	14.2		TP53 Regulates Metabolic Genes	84	4	4.97	0.0034	8.62		MAPK6/MAPK4 signaling	90	7	6.34	0.00011	8.37
																								Negative regulators of DDX58/IFIH1 signaling	34	2	4.75	0.014	14.2		TCF dependent signaling in response to WNT	172	6	4.95	0.0014	6.33		Opioid Signalling	90	7	6.34	0.00011	8.37
																								N-glycan trimming in the ER and Calnexin/Calreticulin cycle	34	2	4.75	0.014	14.2		SUMOylation	173	6	4.93	0.0014	6.29		Mitotic G2-G2/M phases	198	11	6.33	2.1e-05	5.95
																								RHO GTPases activate PKNs	34	2	4.75	0.014	14.2		RUNX2 regulates osteoblast differentiation	24	2	4.92	0.013	15.4		Glucagon signaling in metabolic regulation	33	4	6.3	0.00074	13.5
																								Signaling by WNT in cancer	34	2	4.75	0.014	14.2		Thromboxane signalling through TP receptor	24	2	4.92	0.013	15.4		Signaling by NOTCH2	33	4	6.3	0.00074	13.5
																								Telomere C-strand (Lagging Strand) Synthesis	34	2	4.75	0.014	14.2		Aquaporin-mediated transport	51	3	4.91	0.0062	10.7		Signal amplification	33	4	6.3	0.00074	13.5
																								SARS-CoV-2 activates/modulates innate and adaptive immune responses	123	4	4.67	0.0042	7.83		Extension of Telomeres	51	3	4.91	0.0062	10.7		Transcriptional Regulation by NPAS4	33	4	6.3	0.00074	13.5
																								GPVI-mediated activation cascade	35	2	4.67	0.014	13.8		Transcriptional activity of SMAD2/SMAD3:SMAD4 heterotrimer	51	3	4.91	0.0062	10.7		RUNX1 regulates transcription of genes involved in differentiation of HSCs	70	6	6.25	0.00021	9.26
																								SARS-CoV-1 modulates host translation machinery	35	2	4.67	0.014	13.8		Hedgehog 'on' state	86	4	4.89	0.0037	8.41		N-glycan trimming in the ER and Calnexin/Calreticulin cycle	34	4	6.19	0.00081	13
																								Cell death signalling via NRAGE, NRIF and NADE	74	3	4.65	0.0074	9.73		Regulation of PLK1 Activity at G2/M Transition	86	4	4.89	0.0037	8.41		ER Quality Control Compartment (ERQC)	20	3	6.18	0.0019	17.2
																								Signaling by NOTCH1	74	3	4.65	0.0074	9.73		APC/C-mediated degradation of cell cycle proteins	88	4	4.82	0.0039	8.21		Interleukin-37 signaling	20	3	6.18	0.0019	17.2
																								Cellular response to hypoxia	75	3	4.62	0.0075	9.6		Calnexin/calreticulin cycle	25	2	4.81	0.014	14.7		NOTCH4 Intracellular Domain Regulates Transcription	20	3	6.18	0.0019	17.2
																								PKR-mediated signaling	75	3	4.62	0.0075	9.6		Cyclin A/B1/B2 associated events during G2/M transition	25	2	4.81	0.014	14.7		Signaling by Hippo	20	3	6.18	0.0019	17.2
																								Plasma lipoprotein assembly, remodeling, and clearance	75	3	4.62	0.0075	9.6		Gap-filling DNA repair synthesis and ligation in GG-NER	25	2	4.81	0.014	14.7		Signaling by TGF-beta Receptor Complex	94	7	6.17	0.00014	7.98
																								RNA polymerase II transcribes snRNA genes	75	3	4.62	0.0075	9.6		Glycogen metabolism	25	2	4.81	0.014	14.7		p75 NTR receptor-mediated signalling	95	7	6.12	0.00014	7.89
																								NOD1/2 Signaling Pathway	36	2	4.59	0.015	13.4		G beta:gamma signalling through PI3Kgamma	25	2	4.81	0.014	14.7		RHOBTB GTPase Cycle	35	4	6.09	0.00089	12.6
																								Ca-dependent events	37	2	4.52	0.016	13		NOTCH3 Intracellular Domain Regulates Transcription	25	2	4.81	0.014	14.7		Deubiquitination	243	12	6.06	2.6e-05	5.27
																								FCERI mediated Ca+2 mobilization	37	2	4.52	0.016	13		Formation of TC-NER Pre-Incision Complex	53	3	4.79	0.0068	10.3		Cell-Cell communication	150	9	6.04	7e-05	6.39
																								HSF1-dependent transactivation	37	2	4.52	0.016	13		Diseases of metabolism	236	7	4.76	0.0013	5.39		Interleukin-1 family signaling	151	9	6.01	7.4e-05	6.35
																								RUNX1 interacts with co-factors whose precise effect on RUNX1 targets is not known	37	2	4.52	0.016	13		MAPK6/MAPK4 signaling	90	4	4.75	0.0041	8.02		CTLA4 inhibitory signaling	21	3	6.01	0.0022	16.2
																								RHO GTPase Effectors	262	6	4.5	0.0024	5.57		DNA Double-Strand Break Repair	134	5	4.73	0.0028	6.73		Inflammasomes	21	3	6.01	0.0022	16.2
																								Transcription-Coupled Nucleotide Excision Repair (TC-NER)	78	3	4.5	0.0082	9.21		APC-Cdc20 mediated degradation of Nek2A	26	2	4.7	0.015	14.1		Regulation of FZD by ubiquitination	21	3	6.01	0.0022	16.2
																								Apoptotic cleavage of cellular proteins	38	2	4.45	0.016	12.6		Cardiogenesis	26	2	4.7	0.015	14.1		Regulation of gene expression in beta cells	21	3	6.01	0.0022	16.2
																								DNA Damage Recognition in GG-NER	38	2	4.45	0.016	12.6		Downregulation of TGF-beta receptor signaling	26	2	4.7	0.015	14.1		Synthesis, secretion, and inactivation of Glucagon-like Peptide-1 (GLP-1)	21	3	6.01	0.0022	16.2
																								RNA Polymerase II Pre-transcription Events	80	3	4.43	0.0086	8.97		Polymerase switching on the C-strand of the telomere	26	2	4.7	0.015	14.1		RUNX1 regulates genes involved in megakaryocyte differentiation and platelet function	36	4	5.98	0.00098	12.2
																								Transmission across Chemical Synapses	268	6	4.42	0.0027	5.44		Purinergic signaling in leishmaniasis infection	26	2	4.7	0.015	14.1		AKT phosphorylates targets in the nucleus	10	2	5.93	0.007	24.2
																								Selective autophagy	81	3	4.4	0.0089	8.86		Pyroptosis	26	2	4.7	0.015	14.1		CaMK IV-mediated phosphorylation of CREB	10	2	5.93	0.007	24.2
																								Fanconi Anemia Pathway	39	2	4.38	0.017	12.3		Synthesis of IP3 and IP4 in the cytosol	26	2	4.7	0.015	14.1		Interleukin-21 signaling	10	2	5.93	0.007	24.2
																								Platelet Aggregation (Plug Formation)	39	2	4.38	0.017	12.3		Chromosome Maintenance	92	4	4.68	0.0044	7.83		MASTL Facilitates Mitotic Progression	10	2	5.93	0.007	24.2
																								Transcriptional Regulation by VENTX	39	2	4.38	0.017	12.3		Stabilization of p53	56	3	4.63	0.0076	9.67		MET receptor recycling	10	2	5.93	0.007	24.2
																								Translesion synthesis by Y family DNA polymerases bypasses lesions on DNA template	39	2	4.38	0.017	12.3		Attenuation phase	27	2	4.6	0.016	13.5		Recognition and association of DNA glycosylase with site containing an affected purine	10	2	5.93	0.007	24.2
																								Signaling by NOTCH4	82	3	4.36	0.0091	8.74		G0 and Early G1	27	2	4.6	0.016	13.5		RUNX1 and FOXP3 control the development of regulatory T lymphocytes (Tregs)	10	2	5.93	0.007	24.2
																								TP53 Regulates Metabolic Genes	84	3	4.3	0.0097	8.53		Infection with Mycobacterium tuberculosis	27	2	4.6	0.016	13.5		STAT5 activation downstream of FLT3 ITD mutants	10	2	5.93	0.007	24.2
																								Cellular responses to stimuli	746	11	4.29	0.0012	3.72		TNF signaling	57	3	4.58	0.0079	9.5		Thyroxine biosynthesis	10	2	5.93	0.007	24.2
																								Cyclin A:Cdk2-associated events at S phase entry	85	3	4.26	0.0098	8.42		G alpha (i) signalling events	310	8	4.57	0.0013	4.7		CLEC7A (Dectin-1) signaling	100	7	5.92	0.0002	7.47
																								Signaling by Rho GTPases, Miro GTPases and RHOBTB3	649	10	4.25	0.0015	3.86		Protein folding	96	4	4.55	0.005	7.49		Plasma lipoprotein clearance	37	4	5.89	0.0011	11.9
																								Diseases associated with glycosaminoglycan metabolism	41	2	4.25	0.018	11.7		Meiosis	58	3	4.53	0.0082	9.32		Stabilization of p53	56	5	5.85	0.0006	9.63
																								Dual Incision in GG-NER	41	2	4.25	0.018	11.7		Signaling by NOTCH1 PEST Domain Mutants in Cancer	58	3	4.53	0.0082	9.32		JNK (c-Jun kinases) phosphorylation and activation mediated by activated human TAK1	22	3	5.85	0.0025	15.4
																								MET promotes cell motility	41	2	4.25	0.018	11.7		Adrenaline,noradrenaline inhibits insulin secretion	28	2	4.5	0.017	13		NOTCH2 Activation and Transmission of Signal to the Nucleus	22	3	5.85	0.0025	15.4
																								Anti-inflammatory response favouring Leishmania parasite infection	86	3	4.23	0.01	8.32		Budding and maturation of HIV virion	28	2	4.5	0.017	13		PINK1-PRKN Mediated Mitophagy	22	3	5.85	0.0025	15.4
																								Signaling by Interleukins	459	8	4.21	0.0023	4.29		B-WICH complex positively regulates rRNA expression	28	2	4.5	0.017	13		Regulation of insulin secretion	78	6	5.83	0.00036	8.23
																								Regulation of mRNA stability by proteins that bind AU-rich elements	87	3	4.2	0.01	8.22		Cell Cycle Checkpoints	256	7	4.47	0.0019	4.95		Cell Cycle, Mitotic	497	18	5.79	1.3e-05	3.9
																								EPHB-mediated forward signaling	42	2	4.19	0.019	11.4		CLEC7A (Dectin-1) signaling	100	4	4.43	0.0056	7.18		Translation of SARS-CoV-2 Structural Proteins	57	5	5.79	0.00064	9.45
																								Aggrephagy	43	2	4.13	0.02	11.1		SCF(Skp2)-mediated degradation of p27/p21	60	3	4.43	0.0089	8.99		Cooperation of PDCL (PhLP1) and TRiC/CCT in G-protein beta folding	38	4	5.79	0.0012	11.5
																								E3 ubiquitin ligases ubiquitinate target proteins	43	2	4.13	0.02	11.1		HIV Life Cycle	148	5	4.41	0.0039	6.07		Fanconi Anemia Pathway	39	4	5.7	0.0013	11.2
																								Formation of Incision Complex in GG-NER	43	2	4.13	0.02	11.1		Regulation of TP53 Activity through Acetylation	29	2	4.41	0.018	12.5		Transcriptional Regulation by VENTX	39	4	5.7	0.0013	11.2
																								Positive epigenetic regulation of rRNA expression	43	2	4.13	0.02	11.1		Translation of SARS-CoV-1 Structural Proteins	29	2	4.41	0.018	12.5		activated TAK1 mediates p38 MAPK activation	23	3	5.7	0.0028	14.6
																								MAPK6/MAPK4 signaling	90	3	4.11	0.011	7.94		Mitotic G1 phase and G1/S transition	149	5	4.39	0.004	6.03		IKK complex recruitment mediated by RIP1	23	3	5.7	0.0028	14.6
																								Opioid Signalling	90	3	4.11	0.011	7.94		Signaling by Hedgehog	150	5	4.37	0.0041	5.99		Telomere Extension By Telomerase	23	3	5.7	0.0028	14.6
																								Autophagy	150	4	4.09	0.0075	6.37		Interleukin-1 family signaling	151	5	4.35	0.0042	5.94		Toll Like Receptor 9 (TLR9) Cascade	106	7	5.69	0.00028	7.01
																								Base Excision Repair	44	2	4.07	0.02	10.8		Activation of kainate receptors upon glutamate binding	30	2	4.32	0.019	12.1		DNA Double-Strand Break Repair	134	8	5.67	0.00019	6.32
																								Diseases of programmed cell death	44	2	4.07	0.02	10.8		HSF1 activation	30	2	4.32	0.019	12.1		Post-translational protein modification	1348	34	5.64	3.3e-06	2.84
																								Death Receptor Signaling	152	4	4.05	0.0077	6.29		Insulin receptor recycling	30	2	4.32	0.019	12.1		Toll-like Receptor Cascades	165	9	5.64	0.00014	5.77
																								Class B/2 (Secretin family receptors)	92	3	4.05	0.012	7.76		Recognition of DNA damage by PCNA-containing replication complex	30	2	4.32	0.019	12.1		Androgen biosynthesis	11	2	5.63	0.0082	21.5
																								EPH-Ephrin signaling	92	3	4.05	0.012	7.76		Synthesis of active ubiquitin: roles of E1 and E2 enzymes	30	2	4.32	0.019	12.1		Apoptotic cleavage of cell adhesion proteins	11	2	5.63	0.0082	21.5
																								Eukaryotic Translation Elongation	92	3	4.05	0.012	7.76		Neuronal System	405	9	4.3	0.0016	4.06		Condensation of Prometaphase Chromosomes	11	2	5.63	0.0082	21.5
																								PCP/CE pathway	92	3	4.05	0.012	7.76		Maternal to zygotic transition (MZT)	63	3	4.3	0.01	8.54		MET activates RAP1 and RAC1	11	2	5.63	0.0082	21.5
																								Switching of origins to a post-replicative state	92	3	4.05	0.012	7.76		Processing of DNA double-strand break ends	63	3	4.3	0.01	8.54		Regulation of gene expression by Hypoxia-inducible Factor	11	2	5.63	0.0082	21.5
																								GPER1 signaling	45	2	4.02	0.021	10.6		Influenza Infection	154	5	4.29	0.0045	5.82		Transmission across Chemical Synapses	268	12	5.62	6.3e-05	4.75
																								Factors involved in megakaryocyte development and platelet production	154	4	4.01	0.008	6.2		Toll Like Receptor 9 (TLR9) Cascade	106	4	4.26	0.0066	6.75		Estrogen-dependent nuclear events downstream of ESR-membrane signaling	24	3	5.56	0.0032	13.9
																								Signaling by TGF-beta Receptor Complex	94	3	3.99	0.012	7.59		Oxidative Stress Induced Senescence	64	3	4.25	0.01	8.4		RUNX2 regulates osteoblast differentiation	24	3	5.56	0.0032	13.9
																								p75 NTR receptor-mediated signalling	95	3	3.97	0.012	7.5		Activated NOTCH1 Transmits Signal to the Nucleus	31	2	4.23	0.02	11.7		Thromboxane signalling through TP receptor	24	3	5.56	0.0032	13.9
																								Reproduction	95	3	3.97	0.012	7.5		Downregulation of SMAD2/3:SMAD4 transcriptional activity	31	2	4.23	0.02	11.7		Cytoprotection by HMOX1	61	5	5.54	0.00083	8.77
																								Apoptotic execution phase	46	2	3.97	0.022	10.3		Endosomal Sorting Complex Required For Transport (ESCRT)	31	2	4.23	0.02	11.7		Regulation of PTEN gene transcription	61	5	5.54	0.00083	8.77
																								Negative epigenetic regulation of rRNA expression	46	2	3.97	0.022	10.3		RHO GTPases activate IQGAPs	31	2	4.23	0.02	11.7		DAG and IP3 signaling	41	4	5.53	0.0015	10.6
																								Nuclear events mediated by NFE2L2	96	3	3.94	0.013	7.42		RUNX2 regulates bone development	31	2	4.23	0.02	11.7		MET promotes cell motility	41	4	5.53	0.0015	10.6
																								FCGR3A-mediated IL10 synthesis	47	2	3.91	0.022	10.1		Dual incision in TC-NER	65	3	4.21	0.011	8.27		Cyclin A:Cdk2-associated events at S phase entry	85	6	5.51	0.00054	7.5
																								TGF-beta receptor signaling activates SMADs	47	2	3.91	0.022	10.1		Telomere Maintenance	65	3	4.21	0.011	8.27		Glucagon-like Peptide-1 (GLP1) regulates insulin secretion	42	4	5.45	0.0017	10.3
																								Cellular response to heat stress	99	3	3.86	0.014	7.19		MyD88-independent TLR4 cascade	108	4	4.2	0.0068	6.62		Maternal to zygotic transition (MZT)	63	5	5.43	0.00094	8.47
																								DNA Damage Bypass	48	2	3.86	0.023	9.89		Cell Cycle, Mitotic	497	10	4.15	0.0018	3.68		NCAM signaling for neurite out-growth	63	5	5.43	0.00094	8.47
																								Recycling pathway of L1	48	2	3.86	0.023	9.89		G-protein beta:gamma signalling	32	2	4.15	0.021	11.3		Processing of DNA double-strand break ends	63	5	5.43	0.00094	8.47
																								CLEC7A (Dectin-1) signaling	100	3	3.83	0.014	7.11		RIPK1-mediated regulated necrosis	32	2	4.15	0.021	11.3		Cyclin A/B1/B2 associated events during G2/M transition	25	3	5.43	0.0035	13.3
																								DNA Replication Pre-Initiation	100	3	3.83	0.014	7.11		Termination of translesion DNA synthesis	32	2	4.15	0.021	11.3		Gap-filling DNA repair synthesis and ligation in GG-NER	25	3	5.43	0.0035	13.3
																								Response of EIF2AK4 (GCN2) to amino acid deficiency	100	3	3.83	0.014	7.11		Circadian Clock	68	3	4.09	0.012	7.88		G beta:gamma signalling through PI3Kgamma	25	3	5.43	0.0035	13.3
																								Gap junction trafficking and regulation	49	2	3.81	0.024	9.68		Formation of paraxial mesoderm	68	3	4.09	0.012	7.88		NOTCH3 Intracellular Domain Regulates Transcription	25	3	5.43	0.0035	13.3
																								Netrin-1 signaling	49	2	3.81	0.024	9.68		Toll-like Receptor Cascades	165	5	4.08	0.0056	5.42		Regulation of mRNA stability by proteins that bind AU-rich elements	87	6	5.42	0.00061	7.31
																								SARS-CoV-2 modulates host translation machinery	49	2	3.81	0.024	9.68		Diseases of carbohydrate metabolism	33	2	4.08	0.022	10.9		Toll Like Receptor TLR1:TLR2 Cascade	115	7	5.38	0.00043	6.42
																								Deubiquitination	243	5	3.78	0.0075	4.93		Meiotic synapsis	33	2	4.08	0.022	10.9		APC/C-mediated degradation of cell cycle proteins	88	6	5.38	0.00064	7.22
																								Homology Directed Repair	104	3	3.73	0.015	6.83		Metabolism of steroid hormones	33	2	4.08	0.022	10.9		Aggrephagy	43	4	5.37	0.0018	10
																								EPH-ephrin mediated repulsion of cells	51	2	3.72	0.026	9.29		TNFR1-induced NF-kappa-B signaling pathway	33	2	4.08	0.022	10.9		Positive epigenetic regulation of rRNA expression	43	4	5.37	0.0018	10
																								Toll Like Receptor 9 (TLR9) Cascade	106	3	3.68	0.016	6.7		Hedgehog 'off' state	113	4	4.07	0.0078	6.32		Activation of the TFAP2 (AP-2) family of transcription factors	12	2	5.36	0.0095	19.3
																								Amyloid fiber formation	52	2	3.67	0.027	9.1		Interleukin-1 signaling	114	4	4.05	0.008	6.26		GP1b-IX-V activation signalling	12	2	5.36	0.0095	19.3
																								MyD88-independent TLR4 cascade	108	3	3.64	0.016	6.57		SARS-CoV-2 Infection	291	7	4.04	0.0038	4.33		Interleukin-2 signaling	12	2	5.36	0.0095	19.3
																								Synthesis of PIPs at the plasma membrane	53	2	3.63	0.027	8.92		Toll Like Receptor TLR1:TLR2 Cascade	115	4	4.02	0.0082	6.2		POU5F1 (OCT4), SOX2, NANOG activate genes related to proliferation	12	2	5.36	0.0095	19.3
																								Interleukin-4 and Interleukin-13 signaling	110	3	3.59	0.017	6.45		Transcription of the HIV genome	70	3	4.01	0.013	7.65		DNA Repair	286	12	5.33	0.00011	4.43
																								Nucleotide Excision Repair	110	3	3.59	0.017	6.45		Generation of second messenger molecules	34	2	4	0.023	10.6		APC-Cdc20 mediated degradation of Nek2A	26	3	5.3	0.0039	12.7
																								G-protein mediated events	54	2	3.59	0.028	8.75		Late endosomal microautophagy	34	2	4	0.023	10.6		Constitutive Signaling by AKT1 E17K in Cancer	26	3	5.3	0.0039	12.7
																								Negative regulation of NOTCH4 signaling	54	2	3.59	0.028	8.75		Lysosome Vesicle Biogenesis	34	2	4	0.023	10.6		Dectin-2 family	26	3	5.3	0.0039	12.7
																								SRP-dependent cotranslational protein targeting to membrane	111	3	3.57	0.017	6.39		Negative regulators of DDX58/IFIH1 signaling	34	2	4	0.023	10.6		Purinergic signaling in leishmaniasis infection	26	3	5.3	0.0039	12.7
																								AUF1 (hnRNP D0) binds and destabilizes mRNA	55	2	3.55	0.029	8.58		N-glycan trimming in the ER and Calnexin/Calreticulin cycle	34	2	4	0.023	10.6		Synthesis of IP3 and IP4 in the cytosol	26	3	5.3	0.0039	12.7
																								Degradation of AXIN	55	2	3.55	0.029	8.58		RHO GTPases activate PKNs	34	2	4	0.023	10.6		Diseases of programmed cell death	44	4	5.29	0.0019	9.78
																								SCF-beta-TrCP mediated degradation of Emi1	55	2	3.55	0.029	8.58		Signaling by WNT in cancer	34	2	4	0.023	10.6		Signaling by Hedgehog	150	8	5.23	0.00038	5.61
																								Adherens junctions interactions	56	2	3.51	0.03	8.43		Telomere C-strand (Lagging Strand) Synthesis	34	2	4	0.023	10.6		Death Receptor Signaling	152	8	5.18	0.00041	5.53
																								Interleukin-1 signaling	114	3	3.5	0.018	6.21		The phototransduction cascade	34	2	4	0.023	10.6		G0 and Early G1	27	3	5.18	0.0043	12.2
																								Nonsense-Mediated Decay (NMD)	114	3	3.5	0.018	6.21		HIV Infection	230	6	3.99	0.005	4.68		Circadian Clock	68	5	5.16	0.0013	7.79
																								Toll Like Receptor TLR1:TLR2 Cascade	115	3	3.48	0.019	6.16		Orc1 removal from chromatin	71	3	3.98	0.013	7.53		Late SARS-CoV-2 Infection Events	68	5	5.16	0.0013	7.79
																								Degradation of DVL	57	2	3.47	0.031	8.27		Regulation of lipid metabolism by PPARalpha	117	4	3.97	0.0086	6.09		Negative epigenetic regulation of rRNA expression	46	4	5.15	0.0022	9.31
																								Translation of SARS-CoV-2 Structural Proteins	57	2	3.47	0.031	8.27		Inwardly rectifying K+ channels	35	2	3.93	0.024	10.3		Factors involved in megakaryocyte development and platelet production	154	8	5.13	0.00044	5.45
																								Activation of the mRNA upon binding of the cap-binding complex and eIFs, and subsequent binding to 43S	58	2	3.43	0.032	8.12		SARS-CoV-1 modulates host translation machinery	35	2	3.93	0.024	10.3		Influenza Infection	154	8	5.13	0.00044	5.45
																								Iron uptake and transport	58	2	3.43	0.032	8.12		Cell death signalling via NRAGE, NRIF and NADE	74	3	3.87	0.014	7.22		Condensation of Prophase Chromosomes	13	2	5.12	0.011	17.6
																								Eukaryotic Translation Initiation	118	3	3.42	0.02	5.99		Signaling by NOTCH1	74	3	3.87	0.014	7.22		Telomere C-strand synthesis initiation	13	2	5.12	0.011	17.6
																								Glycosaminoglycan metabolism	118	3	3.42	0.02	5.99		NOD1/2 Signaling Pathway	36	2	3.86	0.025	9.96		Signaling by TGFB family members	124	7	5.1	0.00065	5.93
																								L1CAM interactions	120	3	3.38	0.02	5.89		SARS-CoV-2 activates/modulates innate and adaptive immune responses	123	4	3.83	0.01	5.78		FCGR3A-mediated IL10 synthesis	47	4	5.08	0.0024	9.09
																								Synthesis of DNA	121	3	3.36	0.021	5.84		Cellular response to hypoxia	75	3	3.83	0.015	7.11		Protein folding	96	6	5.07	0.00094	6.58
																								Degradation of GLI1 by the proteasome	60	2	3.35	0.034	7.84		Plasma lipoprotein assembly, remodeling, and clearance	75	3	3.83	0.015	7.11		Budding and maturation of HIV virion	28	3	5.07	0.0048	11.7
																								Metabolism of carbohydrates	286	5	3.32	0.013	4.16		RNA polymerase II transcribes snRNA genes	75	3	3.83	0.015	7.11		Uptake and actions of bacterial toxins	28	3	5.07	0.0048	11.7
																								Defective CFTR causes cystic fibrosis	61	2	3.32	0.035	7.71		Association of TriC/CCT with target proteins during biosynthesis	37	2	3.8	0.026	9.68		Translocation of SLC2A4 (GLUT4) to the plasma membrane	71	5	5.02	0.0016	7.44
																								Signaling by TGFB family members	124	3	3.3	0.022	5.7		Ca-dependent events	37	2	3.8	0.026	9.68		AKT phosphorylates targets in the cytosol	14	2	4.9	0.013	16.1
																								Epigenetic regulation of gene expression	125	3	3.28	0.022	5.65		HSF1-dependent transactivation	37	2	3.8	0.026	9.68		Golgi Cisternae Pericentriolar Stack Reorganization	14	2	4.9	0.013	16.1
																								KEAP1-NFE2L2 pathway	125	3	3.28	0.022	5.65		RUNX1 interacts with co-factors whose precise effect on RUNX1 targets is not known	37	2	3.8	0.026	9.68		Regulation of TP53 Activity through Association with Co-factors	14	2	4.9	0.013	16.1
																								Ca2+ pathway	62	2	3.28	0.035	7.58		Epigenetic regulation of gene expression	125	4	3.79	0.01	5.69		TP53 Regulates Transcription of Genes Involved in G1 Cell Cycle Arrest	14	2	4.9	0.013	16.1
																								Dectin-1 mediated noncanonical NF-kB signaling	62	2	3.28	0.035	7.58		Apoptotic cleavage of cellular proteins	38	2	3.74	0.027	9.41		TRAF3-dependent IRF activation pathway	14	2	4.9	0.013	16.1
																								Peroxisomal protein import	62	2	3.28	0.035	7.58		Cooperation of PDCL (PhLP1) and TRiC/CCT in G-protein beta folding	38	2	3.74	0.027	9.41		YAP1- and WWTR1 (TAZ)-stimulated gene expression	14	2	4.9	0.013	16.1
																								Protein ubiquitination	63	2	3.25	0.036	7.45		DNA Damage Recognition in GG-NER	38	2	3.74	0.027	9.41		Cell death signalling via NRAGE, NRIF and NADE	74	5	4.88	0.0018	7.11
																								Biological oxidations	206	4	3.23	0.017	4.59		Transcription-Coupled Nucleotide Excision Repair (TC-NER)	78	3	3.73	0.016	6.83		Signaling by Rho GTPases, Miro GTPases and RHOBTB3	649	19	4.87	0.00011	3.12
																								DNA Replication	128	3	3.22	0.023	5.51		Signaling by Rho GTPases, Miro GTPases and RHOBTB3	649	11	3.7	0.0036	3.1		Ub-specific processing proteases	165	8	4.87	0.00068	5.07
																								Asymmetric localization of PCP proteins	64	2	3.21	0.037	7.33		Translesion synthesis by Y family DNA polymerases bypasses lesions on DNA template	39	2	3.68	0.028	9.15		Activation of kainate receptors upon glutamate binding	30	3	4.86	0.0057	10.8
																								Semaphorin interactions	64	2	3.21	0.037	7.33		RNA Polymerase II Pre-transcription Events	80	3	3.67	0.017	6.65		MET activates PTK2 signaling	30	3	4.86	0.0057	10.8
																								Host Interactions of HIV factors	130	3	3.19	0.024	5.42		Selective autophagy	81	3	3.64	0.018	6.56		Recognition of DNA damage by PCNA-containing replication complex	30	3	4.86	0.0057	10.8
																								Hedgehog ligand biogenesis	65	2	3.18	0.038	7.22		Signaling by NOTCH4	82	3	3.61	0.018	6.48		Synthesis of active ubiquitin: roles of E1 and E2 enzymes	30	3	4.86	0.0057	10.8
																								Cellular response to chemical stress	211	4	3.17	0.019	4.48		Diseases of glycosylation	134	4	3.6	0.013	5.29		Transcriptional regulation of pluripotent stem cells	30	3	4.86	0.0057	10.8
																								Neuronal System	405	6	3.15	0.013	3.54		RHO GTPase Effectors	262	6	3.58	0.008	4.08		Cellular response to hypoxia	75	5	4.83	0.0019	7.01
																								Diseases of glycosylation	134	3	3.12	0.026	5.26		Platelet homeostasis	83	3	3.58	0.019	6.4		PKR-mediated signaling	75	5	4.83	0.0019	7.01
																								Signaling by ROBO receptors	216	4	3.11	0.02	4.37		Diseases associated with glycosaminoglycan metabolism	41	2	3.56	0.03	8.68		Homology Directed Repair	104	6	4.79	0.0014	6.04
																								G alpha (i) signalling events	310	5	3.1	0.016	3.83		Dual Incision in GG-NER	41	2	3.56	0.03	8.68		Activated NOTCH1 Transmits Signal to the Nucleus	31	3	4.76	0.0062	10.4
																								Formation of paraxial mesoderm	68	2	3.08	0.041	6.89		MET promotes cell motility	41	2	3.56	0.03	8.68		Endosomal Sorting Complex Required For Transport (ESCRT)	31	3	4.76	0.0062	10.4
																								HDR through Homologous Recombination (HRR)	68	2	3.08	0.041	6.89		Phospholipid metabolism	199	5	3.53	0.011	4.46		Regulation of MECP2 expression and activity	31	3	4.76	0.0062	10.4
																								Late SARS-CoV-2 Infection Events	68	2	3.08	0.041	6.89		Cyclin A:Cdk2-associated events at S phase entry	85	3	3.52	0.019	6.24		RHO GTPases activate IQGAPs	31	3	4.76	0.0062	10.4
																								Parasite infection	68	2	3.08	0.041	6.89		EPHB-mediated forward signaling	42	2	3.51	0.032	8.46		Interferon alpha/beta signaling	77	5	4.75	0.0021	6.82
																								Regulation of PTEN stability and activity	69	2	3.05	0.042	6.78		RAC2 GTPase cycle	86	3	3.49	0.02	6.17		Depolymerization of the Nuclear Lamina	15	2	4.71	0.014	14.9
																								PTEN Regulation	139	3	3.03	0.028	5.06		Regulation of mRNA stability by proteins that bind AU-rich elements	87	3	3.46	0.02	6.09		p130Cas linkage to MAPK signaling for integrins	15	2	4.71	0.014	14.9
																								AURKA Activation by TPX2	71	2	2.99	0.044	6.59		Aggrephagy	43	2	3.45	0.033	8.26		Prolactin receptor signaling	15	2	4.71	0.014	14.9
																								Interleukin-17 signaling	71	2	2.99	0.044	6.59		E3 ubiquitin ligases ubiquitinate target proteins	43	2	3.45	0.033	8.26		Formation of TC-NER Pre-Incision Complex	53	4	4.7	0.0036	7.98
																								Translocation of SLC2A4 (GLUT4) to the plasma membrane	71	2	2.99	0.044	6.59		Formation of Incision Complex in GG-NER	43	2	3.45	0.033	8.26		G-protein beta:gamma signalling	32	3	4.67	0.0068	10.1
																								Post-translational protein modification	1348	13	2.96	0.0098	2.41		GABA B receptor activation	43	2	3.45	0.033	8.26		Termination of translesion DNA synthesis	32	3	4.67	0.0068	10.1
																								Regulation of RUNX2 expression and activity	73	2	2.94	0.046	6.4		Positive epigenetic regulation of rRNA expression	43	2	3.45	0.033	8.26		Integration of energy metabolism	108	6	4.66	0.0017	5.8
																								RHO GTPase cycle	440	6	2.91	0.018	3.25		Base Excision Repair	44	2	3.4	0.034	8.06		G-protein mediated events	54	4	4.64	0.0039	7.82
																								APC/C:Cdh1 mediated degradation of Cdc20 and other APC/C:Cdh1 targeted proteins in late mitosis/early G1	74	2	2.91	0.047	6.31		TBC/RABGAPs	44	2	3.4	0.034	8.06		Negative regulation of NOTCH4 signaling	54	4	4.64	0.0039	7.82
																								Interleukin-1 family signaling	151	3	2.84	0.034	4.65		Metabolism of lipids	713	11	3.35	0.0062	2.81		Selective autophagy	81	5	4.58	0.0026	6.46
																								Cellular response to starvation	154	3	2.8	0.036	4.56		EPH-Ephrin signaling	92	3	3.32	0.023	5.75		Diseases of carbohydrate metabolism	33	3	4.58	0.0072	9.72
																								M Phase	353	5	2.75	0.025	3.35		Eukaryotic Translation Elongation	92	3	3.32	0.023	5.75		Meiotic synapsis	33	3	4.58	0.0072	9.72
																								Platelet activation, signaling and aggregation	258	4	2.67	0.033	3.64		PCP/CE pathway	92	3	3.32	0.023	5.75		TNFR1-induced NF-kappa-B signaling pathway	33	3	4.58	0.0072	9.72
																								S Phase	163	3	2.67	0.041	4.3		Switching of origins to a post-replicative state	92	3	3.32	0.023	5.75		Defective GALNT3 causes HFTC	16	2	4.54	0.016	13.8
																								Toll-like Receptor Cascades	165	3	2.65	0.042	4.24		Apoptotic execution phase	46	2	3.31	0.037	7.69		ERCC6 (CSB) and EHMT2 (G9a) positively regulate rRNA expression	16	2	4.54	0.016	13.8
																								Ub-specific processing proteases	165	3	2.65	0.042	4.24		Post-translational protein modification	1348	17	3.3	0.0048	2.36		Polo-like kinase mediated events	16	2	4.54	0.016	13.8
																								Regulation of expression of SLITs and ROBOs	170	3	2.58	0.044	4.12		Autophagy	150	4	3.3	0.017	4.71		Regulation of gene expression in late stage (branching morphogenesis) pancreatic bud precursor cells	16	2	4.54	0.016	13.8
																															Death Receptor Signaling	152	4	3.27	0.018	4.64		Sema3A PAK dependent Axon repulsion	16	2	4.54	0.016	13.8
																															Signaling by TGF-beta Receptor Complex	94	3	3.27	0.024	5.62		SUMOylation of chromatin organization proteins	56	4	4.53	0.0044	7.51
																															TGF-beta receptor signaling activates SMADs	47	2	3.26	0.038	7.52		Platelet homeostasis	83	5	4.51	0.0029	6.29
																															p75 NTR receptor-mediated signalling	95	3	3.25	0.024	5.56		Late endosomal microautophagy	34	3	4.5	0.0077	9.41
																															Reproduction	95	3	3.25	0.024	5.56		Negative regulators of DDX58/IFIH1 signaling	34	3	4.5	0.0077	9.41
																															Factors involved in megakaryocyte development and platelet production	154	4	3.24	0.019	4.58		RHO GTPases activate PKNs	34	3	4.5	0.0077	9.41
																															Nuclear events mediated by NFE2L2	96	3	3.22	0.025	5.5		The phototransduction cascade	34	3	4.5	0.0077	9.41
																															DNA Damage Bypass	48	2	3.21	0.039	7.36		RHO GTPase Effectors	262	10	4.49	0.00082	3.97
																															Inositol phosphate metabolism	48	2	3.21	0.039	7.36		Interleukin-1 signaling	114	6	4.48	0.0021	5.47
																															Recycling pathway of L1	48	2	3.21	0.039	7.36		HIV Life Cycle	148	7	4.47	0.0016	4.91
																															Gap junction trafficking and regulation	49	2	3.17	0.041	7.2		Degradation of DVL	57	4	4.47	0.0046	7.37
																															Netrin-1 signaling	49	2	3.17	0.041	7.2		Interleukin-12 family signaling	57	4	4.47	0.0046	7.37
																															SARS-CoV-2 modulates host translation machinery	49	2	3.17	0.041	7.2		TNF signaling	57	4	4.47	0.0046	7.37
																															Cellular response to heat stress	99	3	3.15	0.027	5.33		Autophagy	150	7	4.42	0.0017	4.84
																															DNA Replication Pre-Initiation	100	3	3.13	0.027	5.27		Meiosis	58	4	4.42	0.0049	7.24
																															Response of EIF2AK4 (GCN2) to amino acid deficiency	100	3	3.13	0.027	5.27		Metabolism of amino acids and derivatives	356	12	4.41	0.00071	3.51
																															EPH-ephrin mediated repulsion of cells	51	2	3.09	0.043	6.91		Nuclear Pore Complex (NPC) Disassembly	35	3	4.41	0.0083	9.11
																															Homology Directed Repair	104	3	3.04	0.03	5.06		Base-Excision Repair, AP Site Formation	17	2	4.38	0.017	12.9
																															Potential therapeutics for SARS	106	3	2.99	0.031	4.96		Butyrate Response Factor 1 (BRF1) binds and destabilizes mRNA	17	2	4.38	0.017	12.9
																															Deubiquitination	243	5	2.98	0.02	3.63		Defective C1GALT1C1 causes TNPS	17	2	4.38	0.017	12.9
																															G-protein mediated events	54	2	2.97	0.048	6.51		IL-6-type cytokine receptor ligand interactions	17	2	4.38	0.017	12.9
																															Negative regulation of NOTCH4 signaling	54	2	2.97	0.048	6.51		Protein methylation	17	2	4.38	0.017	12.9
																															AUF1 (hnRNP D0) binds and destabilizes mRNA	55	2	2.93	0.049	6.38		Signaling by Activin	17	2	4.38	0.017	12.9
																															Degradation of AXIN	55	2	2.93	0.049	6.38		NOD1/2 Signaling Pathway	36	3	4.34	0.0089	8.84
																															SCF-beta-TrCP mediated degradation of Emi1	55	2	2.93	0.049	6.38		SCF(Skp2)-mediated degradation of p27/p21	60	4	4.32	0.0055	6.97
																															Somitogenesis	55	2	2.93	0.049	6.38		Transcriptional Regulation by MECP2	61	4	4.27	0.0058	6.85
																															Nucleotide Excision Repair	110	3	2.91	0.034	4.78		Association of TriC/CCT with target proteins during biosynthesis	37	3	4.26	0.0095	8.58
																															SRP-dependent cotranslational protein targeting to membrane	111	3	2.89	0.034	4.73		Ca-dependent events	37	3	4.26	0.0095	8.58
																															Nonsense-Mediated Decay (NMD)	114	3	2.83	0.037	4.6		Dectin-1 mediated noncanonical NF-kB signaling	62	4	4.23	0.0061	6.73
																															Eukaryotic Translation Initiation	118	3	2.75	0.04	4.44		TP53 Regulates Transcription of DNA Repair Genes	62	4	4.23	0.0061	6.73
																															Glycosaminoglycan metabolism	118	3	2.75	0.04	4.44		MECP2 regulates neuronal receptors and channels	18	2	4.23	0.019	12.1
																															RHO GTPase cycle	440	7	2.74	0.022	2.82		Metabolism of amine-derived hormones	18	2	4.23	0.019	12.1
																															L1CAM interactions	120	3	2.71	0.041	4.37		RORA activates gene expression	18	2	4.23	0.019	12.1
																															Synthesis of DNA	121	3	2.7	0.042	4.33		DNA Damage Recognition in GG-NER	38	3	4.19	0.01	8.33
																															Signaling by TGFB family members	124	3	2.64	0.044	4.22		Epigenetic regulation of gene expression	125	6	4.18	0.0032	4.96
																															KEAP1-NFE2L2 pathway	125	3	2.63	0.045	4.19		Translesion synthesis by Y family DNA polymerases bypasses lesions on DNA template	39	3	4.12	0.011	8.1
																															DNA Replication	128	3	2.57	0.048	4.09		Dual incision in TC-NER	65	4	4.09	0.007	6.4
																															Metabolism of carbohydrates	286	5	2.55	0.034	3.06		Hedgehog ligand biogenesis	65	4	4.09	0.007	6.4
																															Host Interactions of HIV factors	130	3	2.54	0.049	4.02		Initiation of Nuclear Envelope (NE) Reformation	19	2	4.09	0.021	11.4
																															Biological oxidations	206	4	2.52	0.041	3.39		NFE2L2 regulating anti-oxidant/detoxification enzymes	19	2	4.09	0.021	11.4
																															Signaling by ROBO receptors	216	4	2.41	0.047	3.23		Processive synthesis on the C-strand of the telomere	19	2	4.09	0.021	11.4
																																						Synthesis, secretion, and deacylation of Ghrelin	19	2	4.09	0.021	11.4
																																						Response to elevated platelet cytosolic Ca2+	129	6	4.08	0.0037	4.8
																																						Dual Incision in GG-NER	41	3	3.98	0.012	7.67
																																						MTOR signalling	41	3	3.98	0.012	7.67
																																						G beta:gamma signalling through CDC42	20	2	3.97	0.023	10.7
																																						Inhibition of DNA recombination at telomere	20	2	3.97	0.023	10.7
																																						Phosphorylation of the APC/C	20	2	3.97	0.023	10.7
																																						SUMOylation of transcription factors	20	2	3.97	0.023	10.7
																																						TP53 Regulates Transcription of Genes Involved in Cytochrome C Release	20	2	3.97	0.023	10.7
																																						Formation of paraxial mesoderm	68	4	3.96	0.008	6.1
																																						HDR through Homologous Recombination (HRR)	68	4	3.96	0.008	6.1
																																						Regulation of PTEN stability and activity	69	4	3.92	0.0084	6.01
																																						Neuronal System	405	12	3.89	0.0019	3.07
																																						ADORA2B mediated anti-inflammatory cytokines production	43	3	3.86	0.014	7.29
																																						E3 ubiquitin ligases ubiquitinate target proteins	43	3	3.86	0.014	7.29
																																						Formation of Incision Complex in GG-NER	43	3	3.86	0.014	7.29
																																						Vasopressin regulates renal water homeostasis via Aquaporins	43	3	3.86	0.014	7.29
																																						G alpha (i) signalling events	310	10	3.85	0.0025	3.33
																																						Presynaptic function of Kainate receptors	21	2	3.85	0.025	10.2
																																						Signaling by NODAL	21	2	3.85	0.025	10.2
																																						TP53 regulates transcription of additional cell cycle genes whose exact role in the p53 pathway remain uncertain	21	2	3.85	0.025	10.2
																																						Interleukin-17 signaling	71	4	3.84	0.0092	5.83
																																						Orc1 removal from chromatin	71	4	3.84	0.0092	5.83
																																						RNA Polymerase I Transcription Initiation	44	3	3.8	0.015	7.11
																																						TBC/RABGAPs	44	3	3.8	0.015	7.11
																																						Regulation of RUNX2 expression and activity	73	4	3.76	0.01	5.66
																																						Class A/1 (Rhodopsin-like receptors)	320	10	3.74	0.0032	3.22
																																						ADP signalling through P2Y purinoceptor 12	22	2	3.74	0.027	9.67
																																						Cytosolic sulfonation of small molecules	22	2	3.74	0.027	9.67
																																						E2F mediated regulation of DNA replication	22	2	3.74	0.027	9.67
																																						Selenoamino acid metabolism	107	5	3.73	0.0077	4.8
																																						HIV Infection	230	8	3.69	0.0045	3.57
																																						Plasma lipoprotein assembly, remodeling, and clearance	75	4	3.69	0.011	5.5
																																						RNA polymerase II transcribes snRNA genes	75	4	3.69	0.011	5.5
																																						RHOBTB1 GTPase cycle	23	2	3.64	0.029	9.21
																																						Termination of O-glycan biosynthesis	23	2	3.64	0.029	9.21
																																						HIV Transcription Initiation	47	3	3.63	0.017	6.62
																																						Diseases of metabolism	236	8	3.6	0.0052	3.47
																																						Hedgehog 'off' state	113	5	3.58	0.0093	4.53
																																						Transcription-Coupled Nucleotide Excision Repair (TC-NER)	78	4	3.58	0.012	5.27
																																						DNA Damage Bypass	48	3	3.58	0.018	6.48
																																						G alpha (z) signalling events	48	3	3.58	0.018	6.48
																																						Inositol phosphate metabolism	48	3	3.58	0.018	6.48
																																						RNA Polymerase I Transcription	48	3	3.58	0.018	6.48
																																						Growth hormone receptor signaling	24	2	3.54	0.031	8.79
																																						TRAF6 mediated NF-kB activation	24	2	3.54	0.031	8.79
																																						Netrin-1 signaling	49	3	3.53	0.019	6.34
																																						Regulation of HSF1-mediated heat shock response	80	4	3.52	0.013	5.13
																																						Phospholipid metabolism	199	7	3.49	0.0072	3.6
																																						Regulation of lipid metabolism by PPARalpha	117	5	3.48	0.011	4.37
																																						Aquaporin-mediated transport	51	3	3.43	0.021	6.07
																																						Extension of Telomeres	51	3	3.43	0.021	6.07
																																						Chromatin modifying enzymes	204	7	3.41	0.008	3.5
																																						Nuclear Envelope Breakdown	52	3	3.38	0.022	5.95
																																						S Phase	163	6	3.36	0.01	3.75
																																						Cardiogenesis	26	2	3.36	0.036	8.06
																																						Meiotic recombination	26	2	3.36	0.036	8.06
																																						Polymerase switching on the C-strand of the telomere	26	2	3.36	0.036	8.06
																																						Pyroptosis	26	2	3.36	0.036	8.06
																																						Regulation of IFNA/IFNB signaling	26	2	3.36	0.036	8.06
																																						RAC2 GTPase cycle	86	4	3.33	0.016	4.76
																																						FCERI mediated NF-kB activation	87	4	3.3	0.017	4.7
																																						Transcriptional activation of mitochondrial biogenesis	54	3	3.29	0.023	5.71
																																						Syndecan interactions	27	2	3.28	0.038	7.74
																																						AUF1 (hnRNP D0) binds and destabilizes mRNA	55	3	3.25	0.025	5.6
																																						Degradation of AXIN	55	3	3.25	0.025	5.6
																																						SCF-beta-TrCP mediated degradation of Emi1	55	3	3.25	0.025	5.6
																																						Activation of AMPK downstream of NMDARs	28	2	3.2	0.041	7.44
																																						Adrenaline,noradrenaline inhibits insulin secretion	28	2	3.2	0.041	7.44
																																						B-WICH complex positively regulates rRNA expression	28	2	3.2	0.041	7.44
																																						Host Interactions of HIV factors	130	5	3.18	0.016	3.91
																																						Chromosome Maintenance	92	4	3.15	0.02	4.43
																																						PCP/CE pathway	92	4	3.15	0.02	4.43
																																						Switching of origins to a post-replicative state	92	4	3.15	0.02	4.43
																																						Iron uptake and transport	58	3	3.12	0.028	5.3
																																						EGR2 and SOX10-mediated initiation of Schwann cell myelination	29	2	3.12	0.043	7.16
																																						Myogenesis	29	2	3.12	0.043	7.16
																																						TRAF6 mediated IRF7 activation	29	2	3.12	0.043	7.16
																																						RHO GTPase cycle	440	11	3.08	0.009	2.55
																																						Reproduction	95	4	3.07	0.022	4.28
																																						Insulin receptor recycling	30	2	3.05	0.046	6.91
																																						SUMOylation of intracellular receptors	30	2	3.05	0.046	6.91
																																						Degradation of GLI1 by the proteasome	60	3	3.04	0.03	5.11
																																						Defective CFTR causes cystic fibrosis	61	3	3.01	0.031	5.02
																																						Metabolism of carbohydrates	286	8	2.97	0.014	2.84
																																						Activation of anterior HOX genes in hindbrain development during early embryogenesis	62	3	2.97	0.033	4.94
																																						Peroxisomal protein import	62	3	2.97	0.033	4.94
																																						RAB geranylgeranylation	62	3	2.97	0.033	4.94
																																						DNA Replication Pre-Initiation	100	4	2.94	0.025	4.06
																																						Stimuli-sensing channels	100	4	2.94	0.025	4.06
																																						Protein ubiquitination	63	3	2.93	0.034	4.85
																																						Asymmetric localization of PCP proteins	64	3	2.9	0.035	4.77
																																						Semaphorin interactions	64	3	2.9	0.035	4.77
																																						Telomere Maintenance	65	3	2.86	0.036	4.7
																																						M Phase	353	9	2.85	0.015	2.59
																																						Parasite infection	68	3	2.76	0.041	4.48
																																						Mitotic Prometaphase	201	6	2.75	0.023	3.02
																																						Nucleotide Excision Repair	110	4	2.71	0.034	3.67
																																						Transcription of the HIV genome	70	3	2.7	0.043	4.34
																																						AURKA Activation by TPX2	71	3	2.66	0.044	4.28
																																						trans-Golgi Network Vesicle Budding	71	3	2.66	0.044	4.28
																																						APC/C:Cdh1 mediated degradation of Cdc20 and other APC/C:Cdh1 targeted proteins in late mitosis/early G1	74	3	2.57	0.049	4.1
																																						Mitochondrial biogenesis	74	3	2.57	0.049	4.1
																																						Signaling by ROBO receptors	216	6	2.55	0.031	2.8
																																						Metabolism of lipids	713	14	2.51	0.021	2
																																						Synthesis of DNA	121	4	2.48	0.044	3.33
																																						Mitotic Metaphase and Anaphase	235	6	2.32	0.043	2.56

## Sheet: Table S2.2
Table S2.2.1 Top prioritized targets from the integrated Si method for European Ovary																	Table S2.2.2 Pathway enrichment of top 50 genes of European Ovary							Table S2.2.3 Pathway enrichment of top 75 genes of European Ovary							Table S2.2.4 Pathway enrichment of top 100 genes of European Ovary							Table S2.2.5 Pathway enrichment of top 175 genes of European Ovary
Target gene	Priority		Genomic predictors			Seeds	Annotation predictors			Crosstalk	Novelty		Druggability		Description		Pathway	Pathway Size	Overlap Count	Z-score	Adjusted P-value	Odds Ratio		Pathway	Pathway Size	Overlap Count	Z-score	Adjusted P-value	Odds Ratio		Pathway	Pathway Size	Overlap Count	Z-score	Adjusted P-value	Odds Ratio		Pathway	Pathway Size	Overlap Count	Z-score	Adjusted P-value	Odds Ratio
	rank	rating	nGene	cGene	eGene		fGene	pGene	dGene		PCOS drug traget	Approved for other diseases	PDBs	PDBs (with pockets)			Regulation of TP53 Activity through Methylation	19	6	25.8	6.9e-10	187		Regulation of TP53 Activity through Methylation	19	7	24.6	4.4e-11	153		Regulation of TP53 Activity through Methylation	19	7	21.2	1.5e-10	111		DNA Double-Strand Break Repair	134	32	26.8	2.8e-33	38.5
GATA4	1	5	1	0	0	Y	1	1	1	Y	N	N	1	0	GATA binding protein 4		Listeria monocytogenes entry into host cells	20	5	20.9	6.2e-08	132		HDR through MMEJ (alt-NHEJ)	12	5	22.2	1.3e-08	183		DNA Double Strand Break Response	44	10	19.7	1.7e-12	58		DNA Repair	286	47	26.6	1.4e-41	27
ERBB3	2	4.73113	1	0	0	Y	1	0	1	Y	N	Y	21	8	erb-b2 receptor tyrosine kinase 3		DNA Double Strand Break Response	44	7	19.6	1.9e-09	78.5		NF-kB is activated and signals survival	13	5	21.3	1.9e-08	159		Downregulation of ERBB2 signaling	29	8	19.5	6.7e-11	73.4		Homology Directed Repair	104	27	25.8	5.6e-29	41.5
EP300	3	4.56646	0	0	0	N	0	0	0	Y	N	N	42	26	E1A binding protein p300		Regulation of TP53 Expression and Degradation	37	6	18.3	2.6e-08	78.3		DNA Double Strand Break Response	44	9	20.6	1.1e-11	69.9		Regulation of TP53 Expression and Degradation	37	9	19.4	1.1e-11	62.7		Resolution of D-loop Structures through Synthesis-Dependent Strand Annealing (SDSA)	27	12	22.8	2.5e-16	85.8
RPS26	4	4.46785	1	0	1	Y	1	0	0	Y	N	Y	15	3	ribosomal protein S26		STAT3 nuclear events downstream of ALK signaling	10	3	17.8	1.6e-05	161		Listeria monocytogenes entry into host cells	20	6	20.5	3.6e-09	111		HDR through MMEJ (alt-NHEJ)	12	5	19.1	4.2e-08	133		Diseases of DNA repair	51	16	21.9	1.2e-18	50.3
C5orf56	5	4.36646	1	0	2	Y	1	0	0	N	N	N	0	0	chromosome 5 open reading frame 56		Downregulation of ERBB2 signaling	29	5	17.3	2.9e-07	82.6		STAT3 nuclear events downstream of ALK signaling	10	4	19.4	4.8e-07	168		DNA Double-Strand Break Repair	134	17	18.9	1.2e-16	31.2		Resolution of D-Loop Structures	35	13	21.6	1.9e-16	63.9
MAPRE1	6	4.28914	1	0	0	Y	1	0	1	Y	N	N	30	8	microtubule associated protein RP/EB family member 1		Signaling by ERBB4	58	7	17	9.4e-09	57		p75NTR signals via NF-kB	16	5	19.1	5.3e-08	116		Signaling by ERBB2	50	10	18.4	5.3e-12	49.4		HDR through Homologous Recombination (HRR)	68	18	21.2	1.7e-19	40.1
TP53	7	4.26388	0	0	0	N	0	0	0	Y	N	N	170	63	tumor protein p53		Metalloprotease DUBs	20	4	16.7	2.8e-06	96.6		PI3K events in ERBB2 signaling	16	5	19.1	5.3e-08	116		Deactivation of the beta-catenin transactivating complex	41	9	18.4	2.8e-11	54.8		HDR through Single Strand Annealing (SSA)	37	13	21	4.3e-16	58.4
EGFR	8	4.25925	0	0	0	N	0	0	0	Y	N	Y	252	131	epidermal growth factor receptor		HDR through MMEJ (alt-NHEJ)	12	3	16.2	2.5e-05	126		Transcriptional regulation of testis differentiation	12	4	17.7	9.8e-07	126		Downregulation of ERBB2:ERBB3 signaling	13	5	18.3	6.3e-08	117		Signaling by ERBB2	50	15	20.7	2.6e-17	46.8
XRCC1	9	4.23265	0	0	0	N	0	0	0	Y	N	N	10	5	X-ray repair cross complementing 1		Regulation of TP53 Activity	159	11	15.9	7.5e-11	34.1		Signaling by ALK	27	6	17.6	1.7e-08	74.1		NF-kB is activated and signals survival	13	5	18.3	6.3e-08	117		DNA Double Strand Break Response	44	14	20.7	1.3e-16	50.7
CHEK2	10	4.19626	1	0	0	Y	0	0	0	Y	N	N	37	8	checkpoint kinase 2		Signaling by ERBB2	50	6	15.7	1.3e-07	55.2		Regulation of TP53 Expression and Degradation	37	7	17.5	3.6e-09	61.5		Meiotic recombination	26	7	18	1.5e-09	70.2		Constitutive Signaling by Ligand-Responsive EGFR Cancer Variants	19	9	20.4	9.5e-13	94.7
NEIL2	11	4.19015	1	0	1	Y	1	0	0	Y	N	N	0	0	nei like DNA glycosylase 2		Chk1/Chk2(Cds1) mediated inactivation of Cyclin B:Cdk1 complex	13	3	15.5	3e-05	113		Resolution of Abasic Sites (AP sites)	37	7	17.5	3.6e-09	61.5		DNA Repair	286	24	17.9	2.2e-19	21.4		ESR-mediated signaling	161	27	20.3	8.5e-24	23.8
ELAVL1	12	4.17851	0	0	0	N	0	0	0	Y	N	N	10	1	ELAV like RNA binding protein 1		Downregulation of ERBB2:ERBB3 signaling	13	3	15.5	3e-05	113		SARS-CoV-1 activates/modulates innate immune responses	38	7	17.2	3.9e-09	59.5		Listeria monocytogenes entry into host cells	20	6	17.6	1.2e-08	80.8		G2/M DNA damage checkpoint	60	16	20.1	1.7e-17	40
LIG3	13	4.11624	0	0	0	N	0	0	0	Y	N	N	8	6	DNA ligase 3		ERBB2 Activates PTK6 Signaling	13	3	15.5	3e-05	113		Signaling by ERBB2	50	8	17.1	1e-09	50.9		Formation of definitive endoderm	14	5	17.6	9.3e-08	103		Signaling by PTK6	54	15	19.9	8.8e-17	42
BRCA1	14	4.10973	0	0	0	N	0	0	0	Y	N	N	29	11	BRCA1, DNA repair associated		NF-kB is activated and signals survival	13	3	15.5	3e-05	113		Downregulation of ERBB2:ERBB3 signaling	13	4	17	1.3e-06	111		Resolution of Abasic Sites (AP sites)	37	8	17.2	4.7e-10	53.2		Homologous DNA Pairing and Strand Exchange	43	13	19.4	3.6e-15	46.8
YAP1	15	4.1037	1	0	0	Y	1	0	0	Y	N	N	27	17	Yes associated protein 1		Zygotic genome activation (ZGA)	13	3	15.5	3e-05	113		ERBB2 Activates PTK6 Signaling	13	4	17	1.3e-06	111		G2/M DNA damage checkpoint	60	10	16.7	2.8e-11	39.4		Meiotic recombination	26	10	19.3	5e-13	66.3
KPNA2	16	4.09858	0	0	1	Y	1	0	0	Y	N	N	11	5	karyopherin subunit alpha 2		SMAD2/SMAD3:SMAD4 heterotrimer regulates transcription	36	5	15.4	7.6e-07	63.8		Downregulation of ERBB2 signaling	29	6	16.9	2.4e-08	67.7		STAT3 nuclear events downstream of ALK signaling	10	4	16.7	1.2e-06	123		NF-kB is activated and signals survival	13	7	19.2	1.3e-10	121
AFF4	17	4.09801	0	1	0	Y	1	1	0	Y	N	N	9	3	AF4/FMR2 family member 4		Resolution of Abasic Sites (AP sites)	37	5	15.2	8.4e-07	61.8		Signaling by CSF1 (M-CSF) in myeloid cells	31	6	16.4	3.5e-08	62.3		p75NTR signals via NF-kB	16	5	16.4	1.7e-07	84.9		RNA Polymerase II Transcription	1284	78	19.1	2.6e-40	11.3
CDK1	18	4.07844	0	0	0	N	0	0	0	Y	N	N	11	6	cyclin dependent kinase 1		Transcriptional regulation by RUNX3	95	8	15	9.3e-09	39.1		SHC1 events in ERBB2 signaling	22	5	16.2	2.6e-07	75.2		PI3K events in ERBB2 signaling	16	5	16.4	1.7e-07	84.9		Formation of definitive endoderm	14	7	18.5	2.4e-10	104
RAD50	19	4.06755	0	0	1	Y	1	0	0	Y	N	N	1	1	RAD50 double strand break repair protein		Formation of definitive endoderm	14	3	15	3.7e-05	103		Base Excision Repair	44	7	15.9	9.1e-09	49.8		Homology Directed Repair	104	13	16.3	8.3e-13	29.2		Processing of DNA double-strand break ends	63	15	18.3	9.6e-16	34.2
APP	20	4.06357	0	0	0	N	0	0	0	Y	N	Y	96	30	amyloid beta precursor protein		Defective Intrinsic Pathway for Apoptosis	25	4	14.9	5.4e-06	73.6		TAK1-dependent IKK and NF-kappa-B activation	44	7	15.9	9.1e-09	49.8		Estrogen-dependent gene expression	90	12	16.3	3.5e-12	31		Estrogen-dependent gene expression	90	18	18.2	2.5e-17	27.8
RAB5B	21	4.05313	1	0	1	Y	1	0	0	Y	N	N	1	0	RAB5B, member RAS oncogene family		Gap-filling DNA repair synthesis and ligation in GG-NER	25	4	14.9	5.4e-06	73.6		Signaling by ERBB4	58	8	15.8	3.1e-09	42.8		SARS-CoV-1-host interactions	92	12	16.1	4.1e-12	30.3		Downregulation of ERBB2 signaling	29	10	18.2	1.7e-12	55.7
NRF1	22	4.04625	0	0	0	N	0	0	0	Y	N	N	0	0	nuclear respiratory factor 1		Deactivation of the beta-catenin transactivating complex	41	5	14.4	1.4e-06	55		ERBB2 Regulates Cell Motility	15	4	15.8	2.2e-06	91.3		Signaling by PTK6	54	9	15.9	3.2e-10	39		Regulation of TP53 Activity through Methylation	19	8	18.1	5.3e-11	76
CTNNB1	23	4.03261	0	0	0	N	0	0	0	Y	N	N	20	13	catenin beta 1		ERBB2 Regulates Cell Motility	15	3	14.4	4.3e-05	94.4		Cellular Senescence	129	12	15.7	1.3e-11	29.2		Base Excision Repair	44	8	15.7	1.8e-09	42.8		Transcriptional Regulation by TP53	359	37	18	3.3e-25	14.5
NFKB1	24	4.02112	0	0	0	N	0	0	0	Y	N	N	7	3	nuclear factor kappa B subunit 1		G2/M DNA damage checkpoint	60	6	14.3	2.9e-07	44.9		SARS-CoV-1-host interactions	92	10	15.6	1.8e-10	33.7		Signaling by ERBB2 in Cancer	26	6	15.4	5.9e-08	56.5		Signaling by EGFR in Cancer	25	9	17.7	1.7e-11	59.1
IKZF4	25	4.01844	1	0	0	Y	1	0	1	N	N	N	1	0	IKAROS family zinc finger 4		Signaling by ALK	27	4	14.3	6.9e-06	67.2		DNA Repair	286	18	15.5	2.6e-14	21.2		Signaling by ERBB4	58	9	15.3	6e-10	35.8		Cellular Senescence	129	21	17.6	3.1e-18	22.1
PNKP	26	4.01641	0	0	0	N	0	0	0	Y	N	N	2	0	polynucleotide kinase 3'-phosphatase		DNA Double-Strand Break Repair	134	9	14.1	6e-09	31.4		G2/M DNA damage checkpoint	60	8	15.5	3.6e-09	41.2		Transcriptional regulation of testis differentiation	12	4	15.2	2.6e-06	92.1		Base Excision Repair	44	12	17.6	1.8e-13	40.2
SMARCA4	27	4.00465	0	0	0	N	0	0	0	Y	N	N	12	8	SWI/SNF related, matrix associated, actin dependent regulator of chromatin, subfamily a, member 4		MAP3K8 (TPL2)-dependent MAPK1/3 activation	16	3	14	5e-05	87.1		DNA Double-Strand Break Repair	134	12	15.4	1.9e-11	28		RNA Polymerase II Transcription	1284	46	15.1	6.2e-24	11.9		Signaling by CSF1 (M-CSF) in myeloid cells	31	10	17.6	3.6e-12	50.5
H3C13	28	3.9953	0	0	0	N	0	0	0	Y	N	N	20	6	NA		p75NTR signals via NF-kB	16	3	14	5e-05	87.1		Transcriptional regulation by RUNX3	95	10	15.3	2.4e-10	32.5		Resolution of D-loop Structures through Synthesis-Dependent Strand Annealing (SDSA)	27	6	15.1	7e-08	53.8		Signaling by ERBB2 in Cancer	26	9	17.3	2.3e-11	55.7
ERBB4	29	3.99165	1	0	0	Y	1	0	0	Y	N	Y	10	4	erb-b2 receptor tyrosine kinase 4		PI3K events in ERBB2 signaling	16	3	14	5e-05	87.1		Regulation of TP53 Activity	159	13	15.2	8.6e-12	25.8		Signaling by ALK	27	6	15.1	7e-08	53.8		Germ layer formation at gastrulation	16	7	17.3	6.8e-10	80.8
H3C12	30	3.99052	0	0	0	N	0	0	0	Y	N	N	0	0	NA		Spry regulation of FGF signaling	16	3	14	5e-05	87.1		GRB2 events in ERBB2 signaling	16	4	15.2	2.8e-06	83.8		Regulation of TP53 Activity	159	15	15	5.9e-13	21.7		p75NTR signals via NF-kB	16	7	17.3	6.8e-10	80.8
HDAC2	31	3.98976	0	0	0	N	0	0	0	Y	N	Y	27	0	histone deacetylase 2		Base Excision Repair	44	5	13.9	1.7e-06	50.7		Spry regulation of FGF signaling	16	4	15.2	2.8e-06	83.8		Constitutive Signaling by Ligand-Responsive EGFR Cancer Variants	19	5	15	4e-07	66.6		PI3K events in ERBB2 signaling	16	7	17.3	6.8e-10	80.8
SRC	32	3.98269	0	0	0	N	0	0	0	Y	N	Y	62	14	SRC proto-oncogene, non-receptor tyrosine kinase		Diseases of programmed cell death	44	5	13.9	1.7e-06	50.7		SMAD2/SMAD3:SMAD4 heterotrimer regulates transcription	36	6	15.1	8.3e-08	51.9		ESR-mediated signaling	161	15	14.9	6.6e-13	21.4		Signaling by ERBB2 ECD mutants	16	7	17.3	6.8e-10	80.8
H2AX	33	3.97887	0	0	0	N	0	0	0	Y	N	N	3	0	NA		TAK1-dependent IKK and NF-kappa-B activation	44	5	13.9	1.7e-06	50.7		Intracellular signaling by second messengers	308	18	14.9	5.5e-14	19.5		SARS-CoV-1 activates/modulates innate immune responses	38	7	14.7	1.8e-08	43		Spry regulation of FGF signaling	16	7	17.3	6.8e-10	80.8
FOXP3	34	3.96683	0	0	0	N	0	0	0	Y	N	N	2	1	forkhead box P3		Oxidative Stress Induced Senescence	64	6	13.8	4e-07	41.9		Signaling by ERBB2 in Cancer	26	5	14.9	5.4e-07	60.8		Chk1/Chk2(Cds1) mediated inactivation of Cyclin B:Cdk1 complex	13	4	14.6	3.5e-06	81.9		Diseases of signal transduction by growth factor receptors and second messengers	428	39	17.2	1e-24	12.8
RPS27A	35	3.95947	0	0	0	N	0	0	0	Y	N	Y	46	14	ribosomal protein S27a		Regulation of TP53 Activity through Acetylation	29	4	13.8	8.7e-06	61.8		RNA Polymerase II Transcription	1284	38	14.7	1.1e-21	14.7		ERBB2 Activates PTK6 Signaling	13	4	14.6	3.5e-06	81.9		HDR through MMEJ (alt-NHEJ)	12	6	17.1	4.6e-09	103
OGG1	36	3.94879	0	0	0	N	0	0	0	Y	N	N	31	24	8-oxoguanine DNA glycosylase		DNA Repair	286	13	13.7	7.5e-11	23		Transcriptional activity of SMAD2/SMAD3:SMAD4 heterotrimer	51	7	14.7	2.1e-08	41.9		Cellular Senescence	129	13	14.5	9.5e-12	22.8		Transcriptional regulation of testis differentiation	12	6	17.1	4.6e-09	103
YWHAE	37	3.94657	0	0	0	N	0	0	0	Y	N	N	5	0	tyrosine 3-monooxygenase/tryptophan 5-monooxygenase activation protein epsilon		Regulation of TP53 Activity through Phosphorylation	92	7	13.3	1.4e-07	34.1		IRAK2 mediated activation of TAK1 complex	10	3	14.5	3e-05	106		Diseases of DNA repair	51	8	14.5	5.1e-09	35.9		Cell Cycle	628	47	16.7	2.2e-26	10.9
ZBTB16	38	3.94362	1	0	0	Y	1	0	0	Y	N	N	2	1	zinc finger and BTB domain containing 16		SARS-CoV-1-host interactions	92	7	13.3	1.4e-07	34.1		Signaling by PTK6	54	7	14.3	3.1e-08	39.2		G2/M Checkpoints	133	13	14.3	1.3e-11	22.1		Deactivation of the beta-catenin transactivating complex	41	11	16.7	2.3e-12	39.1
IRF1	39	3.93738	1	0	0	Y	1	0	0	Y	N	N	0	0	interferon regulatory factor 1		NOTCH1 Intracellular Domain Regulates Transcription	48	5	13.3	2.5e-06	46		Regulation of NF-kappa B signaling	18	4	14.3	4.4e-06	71.9		Intracellular signaling by second messengers	308	20	14.1	3.3e-14	15.3		Signaling by ERBB4	58	13	16.5	2e-13	31.2
CDK9	40	3.93616	0	0	0	N	0	0	0	Y	N	N	26	11	cyclin dependent kinase 9		Formation of the beta-catenin:TCF transactivating complex	31	4	13.3	1.1e-05	57.3		Deactivation of the beta-catenin transactivating complex	41	6	14.1	1.7e-07	44.5		Signaling by CSF1 (M-CSF) in myeloid cells	31	6	14	1.5e-07	45.2		Regulation of TP53 Activity	159	22	16.4	1.4e-17	18.3
UBA52	41	3.93013	0	0	0	N	0	0	0	Y	N	N	43	19	ubiquitin A-52 residue ribosomal protein fusion product 1		Intracellular signaling by second messengers	308	13	13.2	1.5e-10	21.2		Negative regulation of FGFR3 signaling	29	5	14.1	9e-07	53.2		YAP1- and WWTR1 (TAZ)-stimulated gene expression	14	4	14	4.6e-06	73.7		G2/M Checkpoints	133	20	16.4	8.8e-17	19.9
JUN	42	3.92842	0	0	0	N	0	0	0	Y	N	N	8	1	Jun proto-oncogene, AP-1 transcription factor subunit		Transcriptional Regulation by TP53	359	14	13.1	7.5e-11	20.1		Regulation of TP53 Activity through Phosphorylation	92	9	14	3.6e-09	29.5		SHC1 events in ERBB2 signaling	22	5	13.9	8.4e-07	54.8		Downregulation of ERBB2:ERBB3 signaling	13	6	16.4	7.8e-09	88.5
MESP1	43	3.8828	0	0	0	N	0	0	0	N	N	N	0	0	mesoderm posterior bHLH transcription factor 1		Regulation of NF-kappa B signaling	18	3	13.1	6.9e-05	75.5		Constitutive Signaling by Ligand-Responsive EGFR Cancer Variants	19	4	13.9	5.3e-06	67.1		Bacterial Infection Pathways	70	9	13.8	2.8e-09	28.8		Signaling by Nuclear Receptors	236	27	16.3	2.1e-19	15.2
RAB35	44	3.88078	0	0	0	N	0	0	0	N	N	N	4	3	RAB35, member RAS oncogene family		TP53 Regulates Transcription of Genes Involved in G2 Cell Cycle Arrest	18	3	13.1	6.9e-05	75.5		Signaling by CSF3 (G-CSF)	30	5	13.8	1e-06	51.1		TAK1-dependent IKK and NF-kappa-B activation	44	7	13.6	4.8e-08	36.1		SMAD2/SMAD3:SMAD4 heterotrimer regulates transcription	36	10	16.2	1.7e-11	40.7
HDAC1	45	3.87504	0	0	0	N	0	0	0	N	N	Y	7	1	histone deacetylase 1		Transcriptional activity of SMAD2/SMAD3:SMAD4 heterotrimer	51	5	12.9	3.1e-06	43		Alpha-protein kinase 1 signaling pathway	11	3	13.8	4e-05	92.8		Diseases of signal transduction by growth factor receptors and second messengers	428	23	13.5	1.1e-14	13		Regulation of TP53 Expression and Degradation	37	10	16	2.2e-11	39.2
NR0B1	46	3.86435	0	0	0	N	0	0	0	N	N	N	0	0	nuclear receptor subfamily 0 group B member 1		Oncogene Induced Senescence	33	4	12.9	1.3e-05	53.3		Pexophagy	11	3	13.8	4e-05	92.8		ERBB2 Regulates Cell Motility	15	4	13.5	5.9e-06	67		Resolution of Abasic Sites (AP sites)	37	10	16	2.2e-11	39.2
MDM2	47	3.86316	0	0	0	N	0	0	0	N	N	N	122	90	MDM2 proto-oncogene		Cellular Senescence	129	8	12.8	6.8e-08	28.1		Regulated proteolysis of p75NTR	11	3	13.8	4e-05	92.8		Regulation of TP53 Activity through Phosphorylation	92	10	13.3	1.6e-09	24		Signaling by CSF3 (G-CSF)	30	9	16	8.5e-11	45.1
CDH1	48	3.86134	0	0	0	N	0	0	0	N	N	N	15	3	cadherin 1		Constitutive Signaling by Ligand-Responsive EGFR Cancer Variants	19	3	12.8	7.9e-05	71		TICAM1,TRAF6-dependent induction of TAK1 complex	11	3	13.8	4e-05	92.8		Nonhomologous End-Joining (NHEJ)	34	6	13.3	2.5e-07	40.3		Developmental Biology	1156	63	15.9	1e-28	8.66
EZH2	49	3.8591	0	0	0	N	0	0	0	N	N	Y	25	0	enhancer of zeste 2 polycomb repressive complex 2 subunit		G2/M Checkpoints	133	8	12.5	8.1e-08	27.1		Diseases of programmed cell death	44	6	13.6	2.6e-07	40.9		Resolution of D-Loop Structures	35	6	13.1	2.9e-07	39		Regulation of TP53 Activity through Phosphorylation	92	16	15.9	1.5e-14	23.1
SOX9	50	3.85601	0	0	0	N	0	0	0	N	N	N	1	0	SRY-box 9		Signaling by PTK6	54	5	12.5	3.9e-06	40.4		Formation of the beta-catenin:TCF transactivating complex	31	5	13.6	1.2e-06	49.1		Germ layer formation at gastrulation	16	4	13.1	7.4e-06	61.4		SARS-CoV-1-host interactions	92	16	15.9	1.5e-14	23.1
DMRT1	51	3.85354	0	0	0	N	0	0	0	N	N	N	1	0	doublesex and mab-3 related transcription factor 1		Regulation of RUNX3 expression and activity	55	5	12.4	4.1e-06	39.6		Negative regulation of FGFR4 signaling	31	5	13.6	1.2e-06	49.1		GRB2 events in ERBB2 signaling	16	4	13.1	7.4e-06	61.4		Reproduction	95	16	15.6	2.4e-14	22.3
H4C6	52	3.85338	0	0	0	N	0	0	0	N	N	N	0	0	NA		RNA Polymerase II Transcription	1284	26	12.3	9.2e-15	15.2		Metalloprotease DUBs	20	4	13.6	6.5e-06	62.9		Signaling by ERBB2 ECD mutants	16	4	13.1	7.4e-06	61.4		Fanconi Anemia Pathway	39	10	15.6	3.6e-11	36.5
ERBB2	53	3.84335	0	0	0	N	0	0	0	N	N	Y	31	14	erb-b2 receptor tyrosine kinase 2		Stabilization of p53	56	5	12.3	4.3e-06	38.8		Signaling by KIT in disease	20	4	13.6	6.5e-06	62.9		Spry regulation of FGF signaling	16	4	13.1	7.4e-06	61.4		STAT3 nuclear events downstream of ALK signaling	10	5	15.6	9.8e-08	103
H3-3B	54	3.83383	0	0	0	N	0	0	0	N	N	N	40	16	NA		Signaling by NOTCH1 PEST Domain Mutants in Cancer	58	5	12	4.9e-06	37.3		CD209 (DC-SIGN) signaling	21	4	13.2	7.8e-06	59.2		The NLRP3 inflammasome	16	4	13.1	7.4e-06	61.4		Listeria monocytogenes entry into host cells	20	7	15.4	3.6e-09	55.9
RELA	55	3.83264	0	0	0	N	0	0	0	N	N	N	5	3	RELA proto-oncogene, NF-kB subunit		Ovarian tumor domain proteases	38	4	11.9	2.2e-05	45.5		Signaling by PDGFRA transmembrane, juxtamembrane and kinase domain mutants	12	3	13.2	5.2e-05	82.6		Reproduction	95	10	13	2.1e-09	23.2		Signaling by FGFR3	40	10	15.3	4.5e-11	35.3
MYC	56	3.82599	0	0	0	N	0	0	0	N	N	N	10	4	MYC proto-oncogene, bHLH transcription factor		SARS-CoV-1 activates/modulates innate immune responses	38	4	11.9	2.2e-05	45.5		Homology Directed Repair	104	9	13.1	8.3e-09	25.7		Transcriptional regulation by RUNX3	95	10	13	2.1e-09	23.2		Cardiogenesis	26	8	15.3	7.8e-10	46.5
FEN1	57	3.817	0	0	0	N	0	0	0	N	N	N	13	7	flap structure-specific endonuclease 1		SHC1 events in ERBB2 signaling	22	3	11.8	0.00012	59.7		Negative regulation of FGFR1 signaling	33	5	13.1	1.5e-06	45.7		Signaling by EGFR in Cancer	25	5	13	1.6e-06	46.6		Constitutive Signaling by EGFRvIII	15	6	15.3	2e-08	68.9
FSHR	58	3.81341	1	0	0	Y	1	0	1	N	P3	Y	3	0	follicle stimulating hormone receptor		IRAK2 mediated activation of TAK1 complex	10	2	11.8	0.00095	92.3		NOTCH1 Intracellular Domain Regulates Transcription	48	6	13	4e-07	37		Developmental Biology	1156	38	12.9	6e-18	9.42		ERBB2 Regulates Cell Motility	15	6	15.3	2e-08	68.9
ATM	59	3.80394	0	0	0	N	0	0	0	N	N	N	10	1	ATM serine/threonine kinase		Regulation of PTEN gene transcription	61	5	11.7	5.9e-06	35.3		Negative regulation of FGFR2 signaling	34	5	12.9	1.7e-06	44.1		SARS-CoV-1 Infection	137	12	12.9	3.1e-10	19.3		Signaling by Receptor Tyrosine Kinases	523	39	15.2	1.2e-21	10.2
TRAF6	60	3.80254	0	0	0	N	0	0	0	N	N	N	12	1	TNF receptor associated factor 6		Cytosolic sensors of pathogen-associated DNA	62	5	11.6	6.1e-06	34.7		G2/M Checkpoints	133	10	12.7	3.9e-09	22.4		Processing of DNA double-strand break ends	63	8	12.9	2.6e-08	28		Meiosis	58	12	15.2	4.9e-12	28
SIRT1	61	3.80209	0	0	0	N	0	0	0	N	N	N	8	1	sirtuin 1		Estrogen-dependent gene expression	90	6	11.5	2.1e-06	28.9		Chk1/Chk2(Cds1) mediated inactivation of Cyclin B:Cdk1 complex	13	3	12.7	6.3e-05	74.4		SMAD2/SMAD3:SMAD4 heterotrimer regulates transcription	36	6	12.9	3.4e-07	37.7		Intracellular signaling by second messengers	308	29	15.1	1.3e-18	12.4
DENND1A	62	3.79851	1	1	0	Y	1	0	0	N	N	N	1	1	DENN domain containing 1A		ESR-mediated signaling	161	8	11.3	2.8e-07	22.2		p75NTR recruits signalling complexes	13	3	12.7	6.3e-05	74.4		Infectious disease	898	33	12.8	1.1e-16	9.87		Signaling by FGFR4	41	10	15.1	5.8e-11	34.2
ERCC6	63	3.7918	0	0	0	N	0	0	0	N	N	N	7	0	ERCC excision repair 6, chromatin remodeling factor		APC/C:Cdc20 mediated degradation of Cyclin B	24	3	11.3	0.00015	54		TRAF6 mediated IRF7 activation in TLR7/8 or 9 signaling	13	3	12.7	6.3e-05	74.4		Cell Cycle	628	27	12.8	4.9e-15	10.8		Nonhomologous End-Joining (NHEJ)	34	9	15	2.7e-10	37.9
AR	64	3.78684	0	0	0	N	0	0	0	N	P2	Y	80	80	androgen receptor		Alpha-protein kinase 1 signaling pathway	11	2	11.2	0.0011	81.9		Zygotic genome activation (ZGA)	13	3	12.7	6.3e-05	74.4		Transcriptional Regulation by TP53	359	20	12.8	4.9e-13	13		Signaling by ALK	27	8	15	1.1e-09	44
GRB2	65	3.77073	0	0	0	N	0	0	0	N	N	N	54	27	growth factor receptor bound protein 2		Apoptotic cleavage of cell adhesion proteins	11	2	11.2	0.0011	81.9		Diseases of DNA repair	51	6	12.6	5.4e-07	34.6		Transcriptional regulation by RUNX2	120	11	12.7	1.2e-09	20.1		Transcriptional activity of SMAD2/SMAD3:SMAD4 heterotrimer	51	11	14.9	2.4e-11	29.3
DNMT3B	66	3.76854	1	0	0	Y	1	0	0	N	N	N	26	7	DNA methyltransferase 3 beta		Pexophagy	11	2	11.2	0.0011	81.9		SARS-CoV-1 Infection	137	10	12.5	4.8e-09	21.7		DDX58/IFIH1-mediated induction of interferon-alpha/beta	81	9	12.7	9e-09	24.3		Pexophagy	11	5	14.9	1.7e-07	85.5
FGF9	67	3.7667	0	0	0	N	0	0	0	N	N	N	3	3	fibroblast growth factor 9		Regulation of BACH1 activity	11	2	11.2	0.0011	81.9		Estrogen-dependent gene expression	90	8	12.5	4.3e-08	26.1		Cardiogenesis	26	5	12.7	1.8e-06	44.4		Senescence-Associated Secretory Phenotype (SASP)	52	11	14.7	2.9e-11	28.6
NBN	68	3.76609	0	0	0	N	0	0	0	N	N	N	1	0	nibrin		TICAM1,TRAF6-dependent induction of TAK1 complex	11	2	11.2	0.0011	81.9		Senescence-Associated Secretory Phenotype (SASP)	52	6	12.4	5.9e-07	33.8		Transcriptional activity of SMAD2/SMAD3:SMAD4 heterotrimer	51	7	12.6	1.2e-07	30.3		DNA Damage/Telomere Stress Induced Senescence	28	8	14.7	1.4e-09	41.9
PRKACA	69	3.76236	0	0	0	N	0	0	0	N	N	N	43	25	protein kinase cAMP-activated catalytic subunit alpha		p75 NTR receptor-mediated signalling	95	6	11.1	2.8e-06	27.3		TRAF6 mediated NF-kB activation	24	4	12.3	1.2e-05	50.3		Ovarian tumor domain proteases	38	6	12.6	4.5e-07	35.3		GRB2 events in ERBB2 signaling	16	6	14.7	3.2e-08	61.9
SOX2	70	3.76106	0	0	0	N	0	0	0	N	N	N	8	4	SRY-box 2		G1/S DNA Damage Checkpoints	67	5	11.1	8.6e-06	31.9		Ovarian tumor domain proteases	38	5	12.2	2.8e-06	38.7		Transcriptional regulation by the AP-2 (TFAP2) family of transcription factors	38	6	12.6	4.5e-07	35.3		SARS-CoV-1 targets host intracellular signalling and regulatory pathways	16	6	14.7	3.2e-08	61.9
RUNX1	71	3.75947	0	0	0	N	0	0	0	N	N	N	5	3	runt related transcription factor 1		NOTCH3 Activation and Transmission of Signal to the Nucleus	25	3	11.1	0.00017	51.5		Formation of definitive endoderm	14	3	12.2	7.7e-05	67.6		Senescence-Associated Secretory Phenotype (SASP)	52	7	12.5	1.4e-07	29.6		Infectious disease	898	51	14.6	1.7e-23	8.23
STAT1	72	3.75933	0	0	0	N	0	0	0	N	N	N	6	3	signal transducer and activator of transcription 1		Signaling by EGFR in Cancer	25	3	11.1	0.00017	51.5		IRAK1 recruits IKK complex	14	3	12.2	7.7e-05	67.6		IRAK2 mediated activation of TAK1 complex	10	3	12.5	6.8e-05	78.1		Transcriptional regulation by RUNX2	120	17	14.6	5.9e-14	18.2
NEIL1	73	3.75576	0	0	0	N	0	0	0	N	N	N	25	18	nei like DNA glycosylase 1		Cell Cycle Checkpoints	256	10	11	5.8e-08	18.1		YAP1- and WWTR1 (TAZ)-stimulated gene expression	14	3	12.2	7.7e-05	67.6		POU5F1 (OCT4), SOX2, NANOG repress genes related to differentiation	10	3	12.5	6.8e-05	78.1		Transcriptional regulation by RUNX3	95	15	14.6	4.2e-13	20.5
TBX5	74	3.75487	0	0	0	N	0	0	0	N	N	N	4	2	T-box 5		Bacterial Infection Pathways	70	5	10.9	1e-05	30.4		Signaling by NOTCH	176	11	12.1	3.6e-09	18.6		HDR through Homologous Recombination (HRR)	68	8	12.4	4.4e-08	25.7		TP53 Regulates Transcription of DNA Repair Genes	62	12	14.6	1.1e-11	25.7
STAT3	75	3.73943	0	0	0	N	0	0	0	N	N	N	4	2	signal transducer and activator of transcription 3		Cardiogenesis	26	3	10.9	0.00018	49.3		Transcriptional regulation by RUNX2	120	9	12.1	2.1e-08	22		PI3K/AKT Signaling in Cancer	105	10	12.3	4.9e-09	20.7		SHC1 events in ERBB2 signaling	22	7	14.6	6.9e-09	48.5
BMPR1B	76	3.72532	1	0	0	Y	0	1	0	N	N	Y	1	1	bone morphogenetic protein receptor type 1B		Signaling by ERBB2 in Cancer	26	3	10.9	0.00018	49.3		p75 NTR receptor-mediated signalling	95	8	12.1	6.3e-08	24.6		DNA Damage/Telomere Stress Induced Senescence	28	5	12.3	2.6e-06	40.5		Negative regulation of FGFR3 signaling	29	8	14.5	1.9e-09	39.8
HSP90AB1	77	3.72518	0	0	0	N	0	0	0	N	N	N	13	5	heat shock protein 90 alpha family class B member 1		Signaling by NOTCH	176	8	10.7	4.6e-07	20.2		Defective Intrinsic Pathway for Apoptosis	25	4	12.1	1.4e-05	47.9		Regulation of NF-kappa B signaling	18	4	12.3	1.2e-05	52.6		GAB1 signalosome	17	6	14.3	4.8e-08	56.3
TP53BP1	78	3.72507	0	0	0	N	0	0	0	N	N	N	27	7	tumor protein p53 binding protein 1		Transcriptional regulation by RUNX1	177	8	10.7	4.7e-07	20		Gap-filling DNA repair synthesis and ligation in GG-NER	25	4	12.1	1.4e-05	47.9		Signaling by Nuclear Receptors	236	15	12	8.7e-11	14.1		Signaling by PDGFRA transmembrane, juxtamembrane and kinase domain mutants	12	5	14.2	2.8e-07	73.3
NPM1	79	3.72323	0	0	0	N	0	0	0	N	N	Y	4	2	nucleophosmin		SARS-CoV-1 Infection	137	7	10.7	1.4e-06	22.3		Inactivation of CSF3 (G-CSF) signaling	25	4	12.1	1.4e-05	47.9		Nucleotide-binding domain, leucine rich repeat containing receptor (NLR) signaling pathways	56	7	12	2.1e-07	27.2		Ovarian tumor domain proteases	38	9	14.1	7.1e-10	32.7
XRCC6	80	3.71853	0	0	0	N	0	0	0	N	N	N	19	10	X-ray repair cross complementing 6		Josephin domain DUBs	12	2	10.7	0.0013	73.8		Signaling by EGFR in Cancer	25	4	12.1	1.4e-05	47.9		Negative regulation of FGFR3 signaling	29	5	12	3e-06	38.8		Downregulation of SMAD2/3:SMAD4 transcriptional activity	31	8	14	3.2e-09	36.4
EOMES	81	3.71728	0	0	0	N	0	0	0	N	N	N	0	0	eomesodermin		TICAM1-dependent activation of IRF3/IRF7	12	2	10.7	0.0013	73.8		Transcriptional Regulation by TP53	359	16	12	6.3e-11	14.1		Regulation of TP53 Activity through Acetylation	29	5	12	3e-06	38.8		Negative regulation of FGFR4 signaling	31	8	14	3.2e-09	36.4
AKT1	82	3.71672	0	0	0	N	0	0	0	N	N	N	35	7	AKT serine/threonine kinase 1		Transcriptional regulation of testis differentiation	12	2	10.7	0.0013	73.8		Nucleotide-binding domain, leucine rich repeat containing receptor (NLR) signaling pathways	56	6	12	9e-07	31.1		Signaling by Receptor Tyrosine Kinases	523	23	11.9	5.2e-13	10.5		NOTCH1 Intracellular Domain Regulates Transcription	48	10	13.9	2.8e-10	27.8
KEAP1	83	3.71197	0	0	0	N	0	0	0	N	N	Y	82	16	kelch like ECH associated protein 1		PTEN Regulation	139	7	10.6	1.5e-06	21.9		Stabilization of p53	56	6	12	9e-07	31.1		Alpha-protein kinase 1 signaling pathway	11	3	11.9	8.7e-05	68.4		Bacterial Infection Pathways	70	12	13.7	4e-11	22.2
MED1	84	3.71122	0	0	0	N	0	0	0	N	N	N	2	0	mediator complex subunit 1		Homology Directed Repair	104	6	10.6	4.1e-06	24.7		Signaling by FGFR3	40	5	11.9	3.6e-06	36.6		Constitutive Signaling by Overexpressed ERBB2	11	3	11.9	8.7e-05	68.4		Cell Cycle Checkpoints	256	24	13.6	1.8e-15	11.9
RAD51	85	3.70863	0	0	0	N	0	0	0	N	N	N	10	0	RAD51 recombinase		Signaling by NOTCH1	74	5	10.6	1.3e-05	28.6		Cardiogenesis	26	4	11.8	1.6e-05	45.8		Pexophagy	11	3	11.9	8.7e-05	68.4		Signaling by EGFR	50	10	13.6	4.2e-10	26.5
POLB	86	3.70741	0	0	0	N	0	0	0	N	N	N	393	39	DNA polymerase beta		Toll Like Receptor 9 (TLR9) Cascade	106	6	10.5	4.3e-06	24.2		Meiotic recombination	26	4	11.8	1.6e-05	45.8		Regulated proteolysis of p75NTR	11	3	11.9	8.7e-05	68.4		Gap-filling DNA repair synthesis and ligation in GG-NER	25	7	13.6	1.8e-08	40.4
HSP90AA1	87	3.70648	0	0	0	N	0	0	0	N	N	N	305	184	heat shock protein 90 alpha family class A member 1		MyD88-independent TLR4 cascade	108	6	10.4	4.7e-06	23.8		InlB-mediated entry of Listeria monocytogenes into host cell	15	3	11.8	9.3e-05	62		TICAM1,TRAF6-dependent induction of TAK1 complex	11	3	11.9	8.7e-05	68.4		Chk1/Chk2(Cds1) mediated inactivation of Cyclin B:Cdk1 complex	13	5	13.6	4.2e-07	64
H3-4	88	3.69994	0	0	0	N	0	0	0	N	N	N	1	0	NA		Signaling by NOTCH3	49	4	10.4	4.9e-05	34.4		Constitutive Signaling by Aberrant PI3K in Cancer	78	7	11.7	3.2e-07	25.9		SARS-CoV Infections	414	20	11.8	4.1e-12	11.1		ERBB2 Activates PTK6 Signaling	13	5	13.6	4.2e-07	64
CDK2	89	3.69962	0	0	0	N	0	0	0	N	N	N	428	239	cyclin dependent kinase 2		The role of GTSE1 in G2/M progression after G2 checkpoint	78	5	10.3	1.6e-05	27.1		Signaling by NOTCH1 PEST Domain Mutants in Cancer	58	6	11.7	1e-06	29.9		Negative regulation of the PI3K/AKT network	113	10	11.8	9.3e-09	19.1		p75NTR recruits signalling complexes	13	5	13.6	4.2e-07	64
POU5F1	90	3.6946	0	0	0	N	0	0	0	N	N	N	2	2	POU class 5 homeobox 1		Transcription-Coupled Nucleotide Excision Repair (TC-NER)	78	5	10.3	1.6e-05	27.1		Signaling by FGFR4	41	5	11.7	4e-06	35.5		Homologous DNA Pairing and Strand Exchange	43	6	11.8	9.3e-07	30.6		Suppression of phagosomal maturation	13	5	13.6	4.2e-07	64
RAB7A	91	3.69406	0	0	0	N	0	0	0	N	N	N	6	2	RAB7A, member RAS oncogene family		Signaling by EGFR	50	4	10.3	5e-05	33.6		Resolution of D-loop Structures through Synthesis-Dependent Strand Annealing (SDSA)	27	4	11.6	1.9e-05	43.8		Signaling by CSF3 (G-CSF)	30	5	11.8	3.5e-06	37.3		SARS-CoV-1 Infection	137	17	13.5	4.5e-13	15.6
RAD51C	92	3.68809	0	0	0	N	0	0	0	N	N	N	0	0	RAD51 paralog C		EGR2 and SOX10-mediated initiation of Schwann cell myelination	29	3	10.3	0.00024	43.6		Diseases of signal transduction by growth factor receptors and second messengers	428	17	11.5	6.6e-11	12.7		Transcriptional regulation of granulopoiesis	30	5	11.8	3.5e-06	37.3		Negative regulation of FGFR1 signaling	33	8	13.5	5.2e-09	33.5
YWHAB	93	3.68681	0	0	0	N	0	0	0	N	N	N	13	4	tyrosine 3-monooxygenase/tryptophan 5-monooxygenase activation protein beta		Mitophagy	29	3	10.3	0.00024	43.6		PI3K/AKT Signaling in Cancer	105	8	11.5	1.3e-07	22		Meiosis	58	7	11.7	2.6e-07	26.1		Nuclear events stimulated by ALK signaling in cancer	19	6	13.5	9.6e-08	47.7
SOX17	94	3.68198	0	0	0	N	0	0	0	N	N	N	2	1	SRY-box 17		Negative regulation of FGFR3 signaling	29	3	10.3	0.00024	43.6		DDX58/IFIH1-mediated induction of interferon-alpha/beta	81	7	11.5	3.9e-07	24.9		Diseases of programmed cell death	44	6	11.6	1.1e-06	29.8		Processive synthesis on the C-strand of the telomere	19	6	13.5	9.6e-08	47.7
ESR1	95	3.67749	0	0	0	N	0	0	0	N	P4	N	307	291	estrogen receptor 1		Formation of axial mesoderm	13	2	10.3	0.0014	67.2		Developmental Biology	1156	29	11.4	5.5e-14	9.75		Formation of the beta-catenin:TCF transactivating complex	31	5	11.6	4e-06	35.9		Signaling by FGFR1	52	10	13.3	6.3e-10	25.2
LARP7	96	3.67622	0	0	0	N	0	0	0	N	N	N	5	1	La ribonucleoprotein domain family member 7		p75NTR recruits signalling complexes	13	2	10.3	0.0014	67.2		ESR-mediated signaling	161	10	11.4	1.8e-08	18.2		Negative regulation of FGFR4 signaling	31	5	11.6	4e-06	35.9		Negative regulation of FGFR2 signaling	34	8	13.3	6.5e-09	32.2
NPPA	97	3.66899	0	0	0	N	0	0	0	N	N	N	2	0	natriuretic peptide A		Suppression of phagosomal maturation	13	2	10.3	0.0014	67.2		Toll Like Receptor 9 (TLR9) Cascade	106	8	11.4	1.4e-07	21.8		Metalloprotease DUBs	20	4	11.6	1.7e-05	46.1		Signaling by NOTCH	176	19	13.2	1.9e-13	13.5
CLTC	98	3.66597	0	0	0	N	0	0	0	N	N	N	6	0	clathrin heavy chain		TRAF6 mediated IRF7 activation in TLR7/8 or 9 signaling	13	2	10.3	0.0014	67.2		DNA Damage/Telomere Stress Induced Senescence	28	4	11.4	2.2e-05	42		Signaling by KIT in disease	20	4	11.6	1.7e-05	46.1		Negative regulation of the PI3K/AKT network	113	15	13.2	4.9e-12	16.7
SOX7	99	3.66476	0	0	0	N	0	0	0	N	N	N	0	0	SRY-box 7		Senescence-Associated Secretory Phenotype (SASP)	52	4	10.1	5.8e-05	32.2		ERCC6 (CSB) and EHMT2 (G9a) positively regulate rRNA expression	16	3	11.4	0.00011	57.2		Constitutive Signaling by Aberrant PI3K in Cancer	78	8	11.5	1.2e-07	22		Gastrulation	115	15	13.1	6.2e-12	16.4
RIN1	100	3.66158	0	0	0	N	0	0	0	N	N	N	0	0	Ras and Rab interactor 1		Toll Like Receptor TLR1:TLR2 Cascade	115	6	10	6.1e-06	22.2		MAP3K8 (TPL2)-dependent MAPK1/3 activation	16	3	11.4	0.00011	57.2		Viral Infection Pathways	705	26	11.4	4.9e-13	8.99		Extra-nuclear estrogen signaling	75	12	13.1	8.6e-11	20.4
WT1	101	3.6585	0	0	0	N	0	0	0	N	N	N	21	0	Wilms tumor 1		DDX58/IFIH1-mediated induction of interferon-alpha/beta	81	5	10	1.8e-05	26		NRIF signals cell death from the nucleus	16	3	11.4	0.00011	57.2		Cell Cycle Checkpoints	256	15	11.4	2.6e-10	12.9		Oxidative Stress Induced Senescence	64	11	13.1	2.7e-10	22.1
WRN	102	3.65706	0	0	0	N	0	0	0	N	N	N	11	7	Werner syndrome RecQ like helicase		Glycogen synthesis	14	2	9.91	0.0016	61.6		Signaling by ERBB2 ECD mutants	16	3	11.4	0.00011	57.2		TCF dependent signaling in response to WNT	172	12	11.3	3.2e-09	15.1		Metalloprotease DUBs	20	6	13.1	1.3e-07	44.3
PTPN11	103	3.65156	0	0	0	N	0	0	0	N	N	N	70	28	protein tyrosine phosphatase, non-receptor type 11		IRAK1 recruits IKK complex	14	2	9.91	0.0016	61.6		The NLRP3 inflammasome	16	3	11.4	0.00011	57.2		SUMOylation	173	12	11.3	3.3e-09	15		Signaling by KIT in disease	20	6	13.1	1.3e-07	44.3
RHOA	104	3.64667	0	0	0	N	0	0	0	N	N	N	48	18	ras homolog family member A		Regulation of innate immune responses to cytosolic DNA	14	2	9.91	0.0016	61.6		TRAF6-mediated induction of TAK1 complex within TLR4 complex	16	3	11.4	0.00011	57.2		Cytosolic sensors of pathogen-associated DNA	62	7	11.3	4e-07	24.2		YAP1- and WWTR1 (TAZ)-stimulated gene expression	14	5	13.1	6.3e-07	57
KDM6A	105	3.64405	0	0	0	N	0	0	0	N	N	N	5	4	lysine demethylase 6A		YAP1- and WWTR1 (TAZ)-stimulated gene expression	14	2	9.91	0.0016	61.6		MyD88-independent TLR4 cascade	108	8	11.3	1.6e-07	21.3		CD209 (DC-SIGN) signaling	21	4	11.3	2e-05	43.4		FOXO-mediated transcription	65	11	13	3.1e-10	21.7
CHD4	106	3.64396	0	0	0	N	0	0	0	N	N	N	10	2	chromodomain helicase DNA binding protein 4		Downregulation of SMAD2/3:SMAD4 transcriptional activity	31	3	9.9	0.00028	40.5		Cytosolic sensors of pathogen-associated DNA	62	6	11.3	1.4e-06	27.8		Inflammasomes	21	4	11.3	2e-05	43.4		Transcription-Coupled Nucleotide Excision Repair (TC-NER)	78	12	12.9	1.4e-10	19.5
SIN3A	107	3.64101	0	0	0	N	0	0	0	N	N	N	0	0	SIN3 transcription regulator family member A		EGFR downregulation	31	3	9.9	0.00028	40.5		Processing of DNA double-strand break ends	63	6	11.2	1.5e-06	27.3		POU5F1 (OCT4), SOX2, NANOG activate genes related to proliferation	12	3	11.3	0.00011	60.8		Deubiquitination	243	22	12.8	6.2e-14	11.3
SUOX	108	3.63861	1	0	1	Y	1	0	0	N	N	N	1	0	sulfite oxidase		Negative regulation of FGFR4 signaling	31	3	9.9	0.00028	40.5		Downstream signal transduction	29	4	11.2	2.4e-05	40.3		SARS-CoV-2 targets host intracellular signalling and regulatory pathways	12	3	11.3	0.00011	60.8		PI3K/AKT Signaling in Cancer	105	14	12.8	2.4e-11	16.7
FANCC	109	3.62222	1	0	0	Y	1	0	0	N	N	N	0	0	Fanconi anemia complementation group C		Signaling by CSF1 (M-CSF) in myeloid cells	31	3	9.9	0.00028	40.5		Regulation of TP53 Activity through Acetylation	29	4	11.2	2.4e-05	40.3		Signaling by PDGFRA transmembrane, juxtamembrane and kinase domain mutants	12	3	11.3	0.00011	60.8		FLT3 signaling in disease	28	7	12.8	4.1e-08	34.7
FOXF1	110	3.62118	0	0	0	N	0	0	0	N	N	N	0	0	forkhead box F1		Transcriptional regulation by RUNX2	120	6	9.81	7.5e-06	21.3		Oxidative Stress Induced Senescence	64	6	11.1	1.7e-06	26.8		Specification of primordial germ cells	12	3	11.3	0.00011	60.8		CD209 (DC-SIGN) signaling	21	6	12.8	1.8e-07	41.3
ACTB	111	3.61867	0	0	0	N	0	0	0	N	N	N	8	3	actin beta		Nuclear signaling by ERBB4	32	3	9.73	0.00031	39.1		Negative regulation of the PI3K/AKT network	113	8	11	2.2e-07	20.3		Signaling by NOTCH	176	12	11.2	4e-09	14.7		Cellular responses to stimuli	746	41	12.7	4.4e-18	7.38
CREBBP	112	3.61793	0	0	0	N	0	0	0	N	N	N	115	75	CREB binding protein		Regulation of PLK1 Activity at G2/M Transition	86	5	9.72	2.3e-05	24.4		FGFR1 mutant receptor activation	30	4	11	2.7e-05	38.7		Negative regulation of FGFR1 signaling	33	5	11.2	5.3e-06	33.3		Toll Like Receptor 9 (TLR9) Cascade	106	14	12.7	2.6e-11	16.5
MUS81	113	3.61767	0	0	0	N	0	0	0	N	N	N	9	4	MUS81 structure-specific endonuclease subunit		Nucleotide-binding domain, leucine rich repeat containing receptor (NLR) signaling pathways	56	4	9.72	7.4e-05	29.7		Transcriptional regulation of granulopoiesis	30	4	11	2.7e-05	38.7		NOTCH1 Intracellular Domain Regulates Transcription	48	6	11.1	1.7e-06	26.9		TCF dependent signaling in response to WNT	172	18	12.6	1.4e-12	13
NKX2-5	114	3.61268	0	0	0	N	0	0	0	N	N	N	4	1	NK2 homeobox 5		Negative regulation of FGFR1 signaling	33	3	9.57	0.00033	37.8		Base-Excision Repair, AP Site Formation	17	3	11	0.00013	53.1		Chaperone Mediated Autophagy	22	4	11.1	2.4e-05	41		Downstream signal transduction	29	7	12.6	5.2e-08	33.1
RAB5A	115	3.60649	0	0	0	N	0	0	0	N	N	N	13	4	RAB5A, member RAS oncogene family		Signaling by NOTCH2	33	3	9.57	0.00033	37.8		GAB1 signalosome	17	3	11	0.00013	53.1		Negative regulation of FGFR2 signaling	34	5	11	5.9e-06	32.1		SARS-CoV Infections	414	29	12.5	2.1e-15	8.9
ABL1	116	3.60599	0	0	0	N	0	0	0	N	N	Y	73	28	ABL proto-oncogene 1, non-receptor tyrosine kinase		Glycogen storage diseases	15	2	9.56	0.0018	56.9		Signaling by cytosolic FGFR1 fusion mutants	17	3	11	0.00013	53.1		G1/S DNA Damage Checkpoints	67	7	10.9	6.4e-07	22.2		KEAP1-NFE2L2 pathway	125	15	12.5	2e-11	14.9
LRRK2	117	3.60517	0	0	0	N	0	0	0	N	N	N	17	4	leucine rich repeat kinase 2		InlB-mediated entry of Listeria monocytogenes into host cell	15	2	9.56	0.0018	56.9		Signaling by Receptor Tyrosine Kinases	523	18	10.9	1.3e-10	11.1		p75NTR recruits signalling complexes	13	3	10.9	0.00014	54.7		Nucleotide Excision Repair	110	14	12.5	4.1e-11	15.8
SUMO2	118	3.60456	0	0	0	N	0	0	0	N	N	N	24	7	small ubiquitin-like modifier 2		Negative regulation of FLT3	15	2	9.56	0.0018	56.9		Toll Like Receptor TLR1:TLR2 Cascade	115	8	10.9	2.5e-07	20		Suppression of phagosomal maturation	13	3	10.9	0.00014	54.7		Signaling by NOTCH1 PEST Domain Mutants in Cancer	58	10	12.5	1.7e-09	22.1
SMAD3	119	3.60387	0	0	0	N	0	0	0	N	N	N	9	2	SMAD family member 3		Signaling by NOTCH1 HD Domain Mutants in Cancer	15	2	9.56	0.0018	56.9		G1/S DNA Damage Checkpoints	67	6	10.9	2.1e-06	25.5		TRAF6 mediated IRF7 activation in TLR7/8 or 9 signaling	13	3	10.9	0.00014	54.7		FLT3 Signaling	38	8	12.5	1.5e-08	27.9
BRCA2	120	3.59943	0	0	0	N	0	0	0	N	N	N	4	2	BRCA2, DNA repair associated		Regulated Necrosis	58	4	9.54	8.3e-05	28.6		Infectious disease	898	24	10.8	8.6e-12	9.43		Zygotic genome activation (ZGA)	13	3	10.9	0.00014	54.7		SARS-CoV-1 activates/modulates innate immune responses	38	8	12.5	1.5e-08	27.9
JARID2	121	3.59717	0	0	0	N	0	0	0	N	N	N	4	0	jumonji and AT-rich interaction domain containing 2		TCF dependent signaling in response to WNT	172	7	9.44	4.3e-06	17.5		HDR through Homologous Recombination (HRR)	68	6	10.8	2.3e-06	25.1		HDR through Single Strand Annealing (SSA)	37	5	10.6	8.5e-06	29.1		IRAK2 mediated activation of TAK1 complex	10	4	12.5	6.1e-06	68.1
HDAC5	122	3.59667	0	0	0	N	0	0	0	N	N	Y	0	0	histone deacetylase 5		Negative regulation of FGFR2 signaling	34	3	9.42	0.00036	36.6		Downregulation of SMAD2/3:SMAD4 transcriptional activity	31	4	10.8	3e-05	37.3		TRAF6 mediated NF-kB activation	24	4	10.6	3.4e-05	36.9		Viral Infection Pathways	705	39	12.4	2.6e-17	7.33
BMP4	123	3.595	0	0	0	N	0	0	0	N	N	N	0	0	bone morphogenetic protein 4		Infectious disease	898	17	9.39	6.4e-09	10.2		EGFR downregulation	31	4	10.8	3e-05	37.3		Gastrulation	115	9	10.5	1.4e-07	16.5		Signaling by FGFR2	72	11	12.3	8.5e-10	19.2
PTK2	124	3.59449	0	0	0	N	0	0	0	N	N	N	34	16	protein tyrosine kinase 2		Signaling by TGF-beta Receptor Complex	94	5	9.26	3.3e-05	22.2		Cell Cycle Checkpoints	256	12	10.7	9.7e-09	13.9		IRAK1 recruits IKK complex	14	3	10.5	0.00017	49.8		Regulation of PTEN gene transcription	61	10	12.2	2.6e-09	20.7
BARD1	125	3.5925	0	0	0	N	0	0	0	N	N	N	10	4	BRCA1 associated RING domain 1		Assembly Of The HIV Virion	16	2	9.24	0.0019	52.8		TP53 Regulates Transcription of Genes Involved in G2 Cell Cycle Arrest	18	3	10.7	0.00015	49.6		Physiological factors	14	3	10.5	0.00017	49.8		Response of Mtb to phagocytosis	23	6	12.2	3.1e-07	36.5
CUL1	126	3.59208	0	0	0	N	0	0	0	N	N	N	16	8	cullin 1		ERCC6 (CSB) and EHMT2 (G9a) positively regulate rRNA expression	16	2	9.24	0.0019	52.8		Signaling by TGF-beta Receptor Complex	94	7	10.6	9.2e-07	21.2		Cellular responses to stimuli	746	25	10.4	7.7e-12	8		MAP3K8 (TPL2)-dependent MAPK1/3 activation	16	5	12.2	1.3e-06	46.7
ERCC4	127	3.58363	0	0	0	N	0	0	0	N	N	N	7	2	ERCC excision repair 4, endonuclease catalytic subunit		GRB2 events in ERBB2 signaling	16	2	9.24	0.0019	52.8		Bacterial Infection Pathways	70	6	10.6	2.7e-06	24.3		p75 NTR receptor-mediated signalling	95	8	10.3	4.3e-07	17.7		NRIF signals cell death from the nucleus	16	5	12.2	1.3e-06	46.7
KRAS	128	3.58216	0	0	0	N	0	0	0	N	N	Y	213	42	KRAS proto-oncogene, GTPase		NRIF signals cell death from the nucleus	16	2	9.24	0.0019	52.8		Signaling by NOTCH3	49	5	10.6	8.6e-06	29		Defective Intrinsic Pathway for Apoptosis	25	4	10.3	4e-05	35.1		Cytosolic sensors of pathogen-associated DNA	62	10	12.1	3.1e-09	20.3
ZFPM1	129	3.57988	0	0	0	N	0	0	0	N	N	N	0	0	zinc finger protein, FOG family member 1		SARS-CoV-1 targets host intracellular signalling and regulatory pathways	16	2	9.24	0.0019	52.8		Signaling by EGFR	50	5	10.5	9.3e-06	28.4		Gap-filling DNA repair synthesis and ligation in GG-NER	25	4	10.3	4e-05	35.1		Formation of the beta-catenin:TCF transactivating complex	31	7	12.1	8.3e-08	30.3
AMH	130	3.57684	0	0	0	N	0	0	0	N	N	N	1	0	anti-Mullerian hormone		TGF-beta receptor signaling in EMT (epithelial to mesenchymal transition)	16	2	9.24	0.0019	52.8		Oncogene Induced Senescence	33	4	10.4	3.8e-05	34.8		Inactivation of CSF3 (G-CSF) signaling	25	4	10.3	4e-05	35.1		Signaling by WNT	268	22	12	4e-13	10.1
SQSTM1	131	3.57558	0	0	0	N	0	0	0	N	N	N	23	2	sequestosome 1		The NLRP3 inflammasome	16	2	9.24	0.0019	52.8		TICAM1, RIP1-mediated IKK complex recruitment	19	3	10.4	0.00018	46.4		Stabilization of p53	56	6	10.2	3.7e-06	22.6		Estrogen-dependent nuclear events downstream of ESR-membrane signaling	24	6	11.9	4e-07	34.4
CDK4	132	3.57113	0	0	0	N	0	0	0	N	N	Y	13	6	cyclin dependent kinase 4		TRAF6-mediated induction of TAK1 complex within TLR4 complex	16	2	9.24	0.0019	52.8		Signaling by NOTCH1	74	6	10.3	3.5e-06	22.9		Deubiquitination	243	13	10.1	1.2e-08	11.4		MAPK family signaling cascades	321	24	11.8	2e-13	9.26
H2BC21	133	3.56988	0	0	0	N	0	0	0	N	N	N	7	4	NA		Transcription of E2F targets under negative control by p107 (RBL1) and p130 (RBL2) in complex with HDAC1	16	2	9.24	0.0019	52.8		Signaling by FGFR1	52	5	10.3	1.1e-05	27.2		Signaling by FGFR3	40	5	10.1	1.2e-05	26.6		SUMOylation	173	17	11.8	1.7e-11	12
FOS	134	3.55783	0	0	0	N	0	0	0	N	N	N	3	0	Fos proto-oncogene, AP-1 transcription factor subunit		VLDLR internalisation and degradation	16	2	9.24	0.0019	52.8		Nonhomologous End-Joining (NHEJ)	34	4	10.3	4.2e-05	33.6		Purinergic signaling in leishmaniasis infection	26	4	10.1	4.5e-05	33.5		Base-Excision Repair, AP Site Formation	17	5	11.8	1.8e-06	42.7
XRCC5	135	3.55702	0	0	0	N	0	0	0	N	N	N	23	12	X-ray repair cross complementing 5		TP53 Regulates Transcription of DNA Repair Genes	62	4	9.2	0.0001	26.7		MAPK family signaling cascades	321	13	10.2	1e-08	12.1		Activation of BAD and translocation to mitochondria	15	3	10.1	0.00021	45.5		Alpha-protein kinase 1 signaling pathway	11	4	11.8	9e-06	58.3
RAD51D	136	3.55569	0	0	0	N	0	0	0	N	N	N	1	1	RAD51 paralog D		Processing of DNA double-strand break ends	63	4	9.12	0.00011	26.2		Resolution of D-Loop Structures	35	4	10.1	4.6e-05	32.5		Constitutive Signaling by EGFRvIII	15	3	10.1	0.00021	45.5		Constitutive Signaling by Overexpressed ERBB2	11	4	11.8	9e-06	58.3
CDC20	137	3.55535	0	0	0	N	0	0	0	N	N	N	12	6	cell division cycle 20		Signaling by Nuclear Receptors	236	8	9.09	2.9e-06	14.8		Signaling by PDGFR in disease	20	3	10.1	0.00021	43.8		InlB-mediated entry of Listeria monocytogenes into host cell	15	3	10.1	0.00021	45.5		Regulation of BACH1 activity	11	4	11.8	9e-06	58.3
H2AZ1	138	3.55321	0	0	0	N	0	0	0	N	N	N	11	0	NA		Diseases of signal transduction by growth factor receptors and second messengers	428	11	9.07	3.6e-07	11.9		Transcription-Coupled Nucleotide Excision Repair (TC-NER)	78	6	9.98	4.6e-06	21.6		TFAP2 (AP-2) family regulates transcription of growth factors and their receptors	15	3	10.1	0.00021	45.5		TICAM1,TRAF6-dependent induction of TAK1 complex	11	4	11.8	9e-06	58.3
YWHAZ	139	3.553	0	0	0	N	0	0	0	N	N	N	57	17	tyrosine 3-monooxygenase/tryptophan 5-monooxygenase activation protein zeta		Activation of IRF3, IRF7 mediated by TBK1, IKBKE	17	2	8.95	0.0021	49.3		Regulation of RUNX3 expression and activity	55	5	9.98	1.4e-05	25.6		Signaling by NOTCH1 PEST Domain Mutants in Cancer	58	6	9.99	4.4e-06	21.7		Constitutive Signaling by Aberrant PI3K in Cancer	78	11	11.7	1.9e-09	17.5
CSNK1E	140	3.54733	0	0	0	N	0	0	0	N	N	Y	2	0	casein kinase 1 epsilon		Base-Excision Repair, AP Site Formation	17	2	8.95	0.0021	49.3		Inflammasomes	21	3	9.85	0.00024	41.3		Signaling by FGFR4	41	5	9.98	1.4e-05	25.9		Dual incision in TC-NER	65	10	11.7	4.6e-09	19.2
EIF1B	141	3.54701	0	0	0	N	0	0	0	N	N	N	0	0	eukaryotic translation initiation factor 1B		GAB1 signalosome	17	2	8.95	0.0021	49.3		Negative regulation of MET activity	21	3	9.85	0.00024	41.3		KEAP1-NFE2L2 pathway	125	9	9.97	2.6e-07	15.1		Oncogene Induced Senescence	33	7	11.7	1.3e-07	28
GAPVD1	142	3.54514	0	0	0	N	0	0	0	N	N	N	0	0	GTPase activating protein and VPS9 domains 1		Translesion synthesis by POLK	17	2	8.95	0.0021	49.3		TCF dependent signaling in response to WNT	172	9	9.84	3.6e-07	14.9		The role of GTSE1 in G2/M progression after G2 checkpoint	78	7	9.97	1.7e-06	18.8		Transcriptional regulation by RUNX1	177	17	11.6	2.3e-11	11.7
FOXA3	143	3.5431	0	0	0	N	0	0	0	N	N	N	1	0	forkhead box A3		Transcriptional Regulation by VENTX	39	3	8.76	0.00053	31.5		HDR through Single Strand Annealing (SSA)	37	4	9.81	5.7e-05	30.5		G0 and Early G1	27	4	9.92	5.2e-05	32.1		Signaling by TGFB family members	124	14	11.6	2e-10	13.8
MSH2	144	3.54103	0	0	0	N	0	0	0	N	N	N	9	3	mutS homolog 2		HDR through Homologous Recombination (HRR)	68	4	8.75	0.00015	24.2		Signaling by FGFR1 in disease	37	4	9.81	5.7e-05	30.5		ERCC6 (CSB) and EHMT2 (G9a) positively regulate rRNA expression	16	3	9.74	0.00024	42.1		MyD88-independent TLR4 cascade	108	13	11.6	4.2e-10	14.7
FN1	145	3.53872	0	0	0	N	0	0	0	N	N	Y	63	13	fibronectin 1		Mitotic G2-G2/M phases	198	7	8.71	8.7e-06	15.1		SUMOylation	173	9	9.8	3.7e-07	14.8		MAP3K8 (TPL2)-dependent MAPK1/3 activation	16	3	9.74	0.00024	42.1		Signaling by TGF-beta Receptor Complex	94	12	11.6	1e-09	15.7
TERF1	146	3.53667	0	0	0	N	0	0	0	N	N	N	10	1	telomeric repeat binding factor 1		PI3K/AKT Signaling in Cancer	105	5	8.71	5e-05	19.7		C-type lectin receptors (CLRs)	140	8	9.75	9e-07	16.2		NRIF signals cell death from the nucleus	16	3	9.74	0.00024	42.1		Signaling by MET	79	11	11.6	2.2e-09	17.2
EXO1	147	3.53445	0	0	0	N	0	0	0	N	N	N	15	6	exonuclease 1		MECP2 regulates neuronal receptors and channels	18	2	8.69	0.0024	46.2		Cell Cycle	628	18	9.69	2.1e-09	9.11		SARS-CoV-1 targets host intracellular signalling and regulatory pathways	16	3	9.74	0.00024	42.1		Signaling by ALK in cancer	54	9	11.6	1.4e-08	21
POLR2A	148	3.53336	0	0	0	N	0	0	0	N	N	N	14	3	RNA polymerase II subunit A		Cell Cycle	628	13	8.64	2.4e-07	9.99		Transcriptional regulation by RUNX1	177	9	9.67	4.2e-07	14.5		TRAF6-mediated induction of TAK1 complex within TLR4 complex	16	3	9.74	0.00024	42.1		Inactivation of CSF3 (G-CSF) signaling	25	6	11.6	5e-07	32.6
FANCD2	149	3.53271	0	0	0	N	0	0	0	N	N	N	5	2	Fanconi anemia complementation group D2		Signaling by FGFR3	40	3	8.64	0.00056	30.6		Transcriptional regulation by the AP-2 (TFAP2) family of transcription factors	38	4	9.67	6.2e-05	29.6		VLDLR internalisation and degradation	16	3	9.74	0.00024	42.1		DDX58/IFIH1-mediated induction of interferon-alpha/beta	81	11	11.5	2.8e-09	16.7
PLK1	150	3.53195	0	0	0	N	0	0	0	N	N	N	64	34	polo like kinase 1		Programmed Cell Death	203	7	8.58	1e-05	14.7		JNK (c-Jun kinases) phosphorylation and activation mediated by activated human TAK1	22	3	9.61	0.00027	39.2		Toll Like Receptor 9 (TLR9) Cascade	106	8	9.66	9.4e-07	15.7		Diseases of programmed cell death	44	8	11.5	5e-08	23.3
GIP	151	3.53097	0	0	0	N	0	0	0	N	N	N	8	0	gastric inhibitory polypeptide		Death Receptor Signaling	152	6	8.58	2.3e-05	16.6		Regulation of signaling by CBL	22	3	9.61	0.00027	39.2		MyD88-independent TLR4 cascade	108	8	9.55	1.1e-06	15.4		TAK1-dependent IKK and NF-kappa-B activation	44	8	11.5	5e-08	23.3
PIK3C3	152	3.53018	0	0	0	N	0	0	0	N	N	N	17	8	phosphatidylinositol 3-kinase catalytic subunit type 3		Interleukin-17 signaling	71	4	8.54	0.00017	23		Interleukin-21 signaling	10	2	9.6	0.0016	61.1		Downstream signal transduction	29	4	9.54	6.8e-05	29.5		Regulation of NF-kappa B signaling	18	5	11.5	2.4e-06	39.5
MAPK3	153	3.52728	0	0	0	N	0	0	0	N	N	N	3	0	mitogen-activated protein kinase 3		Signaling by FGFR4	41	3	8.53	0.0006	29.8		Regulation of FOXO transcriptional activity by acetylation	10	2	9.6	0.0016	61.1		Signaling by WNT	268	13	9.47	3.6e-08	10.3		Nuclear events mediated by NFE2L2	96	12	11.4	1.3e-09	15.3
RPA1	154	3.5261	0	0	0	N	0	0	0	N	N	N	28	12	replication protein A1		Developmental Biology	1156	18	8.5	2.6e-08	8.48		RUNX1 and FOXP3 control the development of regulatory T lymphocytes (Tregs)	10	2	9.6	0.0016	61.1		Mitotic G2-G2/M phases	198	11	9.46	1.3e-07	11.7		SARS-CoV-2 targets host intracellular signalling and regulatory pathways	12	4	11.3	1.3e-05	51.1
FANCM	155	3.52219	0	0	0	N	0	0	0	N	N	N	5	3	Fanconi anemia complementation group M		Nucleotide Excision Repair	110	5	8.48	5.9e-05	18.8		RUNX3 regulates p14-ARF	10	2	9.6	0.0016	61.1		SARS-CoV-2-host interactions	198	11	9.46	1.3e-07	11.7		Specification of primordial germ cells	12	4	11.3	1.3e-05	51.1
UBB	156	3.51912	0	0	0	N	0	0	0	N	N	N	185	73	ubiquitin B		TICAM1, RIP1-mediated IKK complex recruitment	19	2	8.44	0.0026	43.5		Signaling by Interleukins	459	15	9.59	9.1e-09	9.96		Oxidative Stress Induced Senescence	64	6	9.45	7.3e-06	19.5		Signaling by Interleukins	459	28	11.2	1.9e-13	7.6
PTEN	157	3.51798	0	0	0	N	0	0	0	N	N	N	8	2	phosphatase and tensin homolog		Translesion Synthesis by POLH	19	2	8.44	0.0026	43.5		Transcriptional Regulation by VENTX	39	4	9.53	6.6e-05	28.8		Regulation of PLK1 Activity at G2/M Transition	86	7	9.43	3e-06	16.9		Global Genome Nucleotide Excision Repair (GG-NER)	84	11	11.2	4e-09	16
EED	158	3.51783	0	0	0	N	0	0	0	N	N	N	64	2	embryonic ectoderm development		Interleukin-1 signaling	114	5	8.31	6.9e-05	18.1		Interleukin-1 signaling	114	7	9.5	2.7e-06	17.2		Base-Excision Repair, AP Site Formation	17	3	9.43	0.00029	39.1		Cellular response to chemical stress	211	18	11.1	3.5e-11	10.3
IGF1R	159	3.51735	0	0	0	N	0	0	0	N	N	Y	31	20	insulin like growth factor 1 receptor		Positive epigenetic regulation of rRNA expression	43	3	8.31	0.00069	28.4		SARS-CoV Infections	414	14	9.46	1.9e-08	10.2		GAB1 signalosome	17	3	9.43	0.00029	39.1		Regulation of PLK1 Activity at G2/M Transition	86	11	11.1	4.9e-09	15.6
GOLGA2	160	3.51653	0	0	0	N	0	0	0	N	N	N	4	3	golgin A2		Gastrulation	115	5	8.27	7.1e-05	17.9		Regulation of PLK1 Activity at G2/M Transition	86	6	9.45	7.7e-06	19.4		Signaling by cytosolic FGFR1 fusion mutants	17	3	9.43	0.00029	39.1		Cyclin D associated events in G1	47	8	11.1	8.3e-08	21.5
EEA1	161	3.51558	0	0	0	N	0	0	0	N	N	N	4	1	early endosome antigen 1		ER Quality Control Compartment (ERQC)	20	2	8.22	0.0027	41.1		Regulation of PTEN gene transcription	61	5	9.43	2.2e-05	22.8		FOXO-mediated transcription	65	6	9.37	7.7e-06	19.2		Infection with Mycobacterium tuberculosis	27	6	11.1	7.9e-07	29.5
GATA3	162	3.51411	0	0	0	N	0	0	0	N	N	N	3	0	GATA binding protein 3		Signaling by Hippo	20	2	8.22	0.0027	41.1		activated TAK1 mediates p38 MAPK activation	23	3	9.39	0.0003	37.2		Activation of BH3-only proteins	30	4	9.37	7.6e-05	28.4		Interleukin-3, Interleukin-5 and GM-CSF signaling	48	8	11	9.6e-08	20.9
KAT5	163	3.51209	0	0	0	N	0	0	0	N	N	N	3	1	lysine acetyltransferase 5		SUMOylation of transcription factors	20	2	8.22	0.0027	41.1		IKK complex recruitment mediated by RIP1	23	3	9.39	0.0003	37.2		FGFR1 mutant receptor activation	30	4	9.37	7.6e-05	28.4		Cytokine Signaling in Immune system	770	37	10.9	1.5e-14	6.2
ELOB	164	3.51049	0	0	0	N	0	0	0	N	N	N	79	34	elongin B		Toll-like Receptor Cascades	165	6	8.19	3.3e-05	15.2		TP53 Regulates Transcription of DNA Repair Genes	62	5	9.35	2.4e-05	22.4		Transcriptional regulation of pluripotent stem cells	30	4	9.37	7.6e-05	28.4		Signaling by FGFR	88	11	10.9	6.2e-09	15.2
CUL3	165	3.5085	0	0	0	N	0	0	0	N	N	N	6	4	cullin 3		Constitutive Signaling by Aberrant PI3K in Cancer	78	4	8.11	0.00023	20.9		Interleukin-1 family signaling	151	8	9.33	1.4e-06	14.9		Programmed Cell Death	203	11	9.32	1.5e-07	11.3		Signaling by NOTCH1	74	10	10.9	1.5e-08	16.5
H3-7	166	3.50719	0	0	0	N	0	0	0	N	N	N	0	0	NA		Apoptosis	171	6	8.02	3.9e-05	14.7		Death Receptor Signaling	152	8	9.3	1.5e-06	14.8		RAB GEFs exchange GTP for GDP on RABs	88	7	9.31	3.4e-06	16.4		Transcriptional regulation by the AP-2 (TFAP2) family of transcription factors	38	7	10.9	3.3e-07	23.5
RTF1	167	3.50717	0	0	0	N	0	0	0	N	N	N	6	4	RTF1 homolog, Paf1/RNA polymerase II complex component		CD209 (DC-SIGN) signaling	21	2	8.01	0.0029	38.9		Cellular responses to stimuli	746	19	9.22	3.6e-09	8.17		Toll Like Receptor TLR1:TLR2 Cascade	115	8	9.21	1.7e-06	14.4		PTEN Regulation	139	14	10.8	7.6e-10	12.1
POLD1	168	3.5062	0	0	0	N	0	0	0	N	N	Y	5	3	DNA polymerase delta 1, catalytic subunit		Inflammasomes	21	2	8.01	0.0029	38.9		MAPK6/MAPK4 signaling	90	6	9.21	9.3e-06	18.5		MAPK family signaling cascades	321	14	9.2	3.4e-08	9.31		Signaling by NOTCH3	49	8	10.8	1.1e-07	20.4
PIK3CA	169	3.49722	0	0	0	N	0	0	0	N	N	Y	63	23	phosphatidylinositol-4,5-bisphosphate 3-kinase catalytic subunit alpha		Negative regulation of MET activity	21	2	8.01	0.0029	38.9		APC/C:Cdc20 mediated degradation of Cyclin B	24	3	9.18	0.00034	35.4		Downregulation of SMAD2/3:SMAD4 transcriptional activity	31	4	9.2	8.5e-05	27.3		Signaling by PDGFR in disease	20	5	10.8	4.1e-06	34.2
GDI2	170	3.49367	0	0	0	N	0	0	0	N	N	N	0	0	GDP dissociation inhibitor 2		Regulation of FZD by ubiquitination	21	2	8.01	0.0029	38.9		RUNX2 regulates osteoblast differentiation	24	3	9.18	0.00034	35.4		EGFR downregulation	31	4	9.2	8.5e-05	27.3		Formation of axial mesoderm	13	4	10.8	1.8e-05	45.4
SMAD4	171	3.49336	0	0	0	N	0	0	0	N	N	N	10	3	SMAD family member 4		Signaling by Receptor Tyrosine Kinases	523	11	8	1.9e-06	9.65		Signaling by Nuclear Receptors	236	10	9.16	4.1e-07	12.1		TP53 Regulates Transcription of Genes Involved in G2 Cell Cycle Arrest	18	3	9.15	0.00033	36.5		PRC2 methylates histones and DNA	13	4	10.8	1.8e-05	45.4
FOXA1	172	3.49216	0	0	0	N	0	0	0	N	N	N	0	0	forkhead box A1		SUMOylation	173	6	7.96	4.1e-05	14.5		Apoptotic cleavage of cell adhesion proteins	11	2	9.13	0.0019	54.3		Signaling by Interleukins	459	17	9.13	8.3e-09	8.09		TRAF6 mediated IRF7 activation in TLR7/8 or 9 signaling	13	4	10.8	1.8e-05	45.4
ERCC1	173	3.49116	0	0	0	N	0	0	0	N	N	N	8	3	ERCC excision repair 1, endonuclease non-catalytic subunit		Signaling by TGFB family members	124	5	7.92	9.7e-05	16.6		Constitutive Signaling by Overexpressed ERBB2	11	2	9.13	0.0019	54.3		Transcriptional regulation by RUNX1	177	10	9.11	4.1e-07	11.7		Zygotic genome activation (ZGA)	13	4	10.8	1.8e-05	45.4
TERF2	174	3.48387	0	0	0	N	0	0	0	N	N	N	14	3	telomeric repeat binding factor 2		Cyclin D associated events in G1	47	3	7.92	0.00087	25.8		Interleukin-27 signaling	11	2	9.13	0.0019	54.3		Cellular response to chemical stress	211	11	9.1	2.2e-07	10.9		Epigenetic regulation of gene expression	125	13	10.7	2.2e-09	12.5
EGF	175	3.48371	0	0	0	N	0	0	0	N	N	N	11	1	epidermal growth factor		KEAP1-NFE2L2 pathway	125	5	7.89	0.0001	16.4		Interleukin-6 signaling	11	2	9.13	0.0019	54.3		Signaling by NOTCH3	49	5	9.05	3e-05	21.2		Regulation of TP53 Activity through Acetylation	29	6	10.7	1.2e-06	26.9
																	Chaperone Mediated Autophagy	22	2	7.81	0.0031	37		Regulation of BACH1 activity	11	2	9.13	0.0019	54.3		TP53 Regulates Transcription of Cell Cycle Genes	49	5	9.05	3e-05	21.2		Toll-like Receptor Cascades	165	15	10.6	7.1e-10	10.9
																	JNK (c-Jun kinases) phosphorylation and activation mediated by activated human TAK1	22	2	7.81	0.0031	37		Signaling by TGFB family members	124	7	9.05	4.5e-06	15.7		Nuclear signaling by ERBB4	32	4	9.05	9.3e-05	26.4		Ub-specific processing proteases	165	15	10.6	7.1e-10	10.9
																	NOTCH2 Activation and Transmission of Signal to the Nucleus	22	2	7.81	0.0031	37		Homologous DNA Pairing and Strand Exchange	43	4	9.04	9.3e-05	25.8		Signaling by TGF-beta Receptor Complex	94	7	8.96	4.9e-06	15.3		Transcriptional regulation of granulopoiesis	30	6	10.5	1.5e-06	25.8
																	PINK1-PRKN Mediated Mitophagy	22	2	7.81	0.0031	37		Positive epigenetic regulation of rRNA expression	43	4	9.04	9.3e-05	25.8		Signaling by EGFR	50	5	8.94	3.3e-05	20.7		p75 NTR receptor-mediated signalling	95	11	10.4	1.3e-08	13.9
																	RAS processing	22	2	7.81	0.0031	37		Signaling by SCF-KIT	43	4	9.04	9.3e-05	25.8		Oncogene Induced Senescence	33	4	8.9	0.0001	25.4		Dual Incision in GG-NER	41	7	10.4	5.3e-07	21.4
																	Regulation of signaling by CBL	22	2	7.81	0.0031	37		Cytokine Signaling in Immune system	770	19	9.02	4.3e-09	7.9		Nuclear events stimulated by ALK signaling in cancer	19	3	8.89	0.00038	34.2		Golgi Cisternae Pericentriolar Stack Reorganization	14	4	10.4	2.4e-05	40.8
																	Degradation of beta-catenin by the destruction complex	84	4	7.78	0.00028	19.3		Epigenetic regulation of gene expression	125	7	9.01	4.6e-06	15.6		TICAM1, RIP1-mediated IKK complex recruitment	19	3	8.89	0.00038	34.2		IRAK1 recruits IKK complex	14	4	10.4	2.4e-05	40.8
																	Global Genome Nucleotide Excision Repair (GG-NER)	84	4	7.78	0.00028	19.3		KEAP1-NFE2L2 pathway	125	7	9.01	4.6e-06	15.6		Nuclear events mediated by NFE2L2	96	7	8.85	5.5e-06	15		Physiological factors	14	4	10.4	2.4e-05	40.8
																	Pre-NOTCH Expression and Processing	49	3	7.74	0.00096	24.7		Deubiquitination	243	10	9	5.2e-07	11.7		Signaling by TGFB family members	124	8	8.81	2.8e-06	13.2		SHC1 events in EGFR signaling	14	4	10.4	2.4e-05	40.8
																	TP53 Regulates Transcription of Cell Cycle Genes	49	3	7.74	0.00096	24.7		Viral Infection Pathways	705	18	8.98	7.7e-09	8.05		Signaling by FGFR1	52	5	8.75	3.9e-05	19.8		Toll Like Receptor TLR1:TLR2 Cascade	115	12	10.3	8.5e-09	12.5
																	Deubiquitination	243	7	7.72	2.6e-05	12.2		NOTCH3 Activation and Transmission of Signal to the Nucleus	25	3	8.98	0.00038	33.8		Cytokine Signaling in Immune system	770	22	8.73	2.9e-09	6.49		EGFR downregulation	31	6	10.3	1.8e-06	24.8
																	activated TAK1 mediates p38 MAPK activation	23	2	7.63	0.0033	35.2		Nuclear events mediated by NFE2L2	96	6	8.88	1.3e-05	17.3		Signaling by NOTCH1	74	6	8.71	1.5e-05	16.6		RUNX2 regulates bone development	31	6	10.3	1.8e-06	24.8
																	IKK complex recruitment mediated by RIP1	23	2	7.63	0.0033	35.2		Toll-like Receptor Cascades	165	8	8.86	2.5e-06	13.6		Intrinsic Pathway for Apoptosis	53	5	8.66	4.2e-05	19.4		Chaperone Mediated Autophagy	22	5	10.3	6.6e-06	30.2
																	Long-term potentiation	23	2	7.63	0.0033	35.2		Purinergic signaling in leishmaniasis infection	26	3	8.79	0.00042	32.4		Signaling by Hippo	20	3	8.65	0.00044	32.2		Regulation of signaling by CBL	22	5	10.3	6.6e-06	30.2
																	Response of Mtb to phagocytosis	23	2	7.63	0.0033	35.2		Interleukin-35 Signalling	12	2	8.73	0.0022	48.9		Signaling by PDGFR in disease	20	3	8.65	0.00044	32.2		Factors involved in megakaryocyte development and platelet production	154	14	10.2	2.6e-09	10.8
																	Diseases of DNA repair	51	3	7.57	0.0011	23.6		Josephin domain DUBs	12	2	8.73	0.0022	48.9		SUMOylation of transcription factors	20	3	8.65	0.00044	32.2		Signaling by NTRKs	134	13	10.2	4.6e-09	11.5
																	MAPK family signaling cascades	321	8	7.56	1.7e-05	10.7		POU5F1 (OCT4), SOX2, NANOG activate genes related to proliferation	12	2	8.73	0.0022	48.9		Regulation of RUNX3 expression and activity	55	5	8.48	5e-05	18.6		Circadian Clock	68	9	10.2	1e-07	16
																	MAPK6/MAPK4 signaling	90	4	7.49	0.00036	18		TICAM1-dependent activation of IRF3/IRF7	12	2	8.73	0.0022	48.9		Ub-specific processing proteases	165	9	8.45	2.2e-06	11.2		Cell Cycle, Mitotic	497	27	10.1	7e-12	6.65
																	Amyloid fiber formation	52	3	7.49	0.0011	23.1		TP53 Regulates Transcription of Caspase Activators and Caspases	12	2	8.73	0.0022	48.9		Transcription-Coupled Nucleotide Excision Repair (TC-NER)	78	6	8.45	2e-05	15.7		SARS-CoV-2-host interactions	198	16	10.1	9.1e-10	9.6
																	Signaling by FGFR1	52	3	7.49	0.0011	23.1		Negative epigenetic regulation of rRNA expression	46	4	8.71	0.00012	24		Negative regulation of MET activity	21	3	8.42	0.0005	30.4		Fc epsilon receptor (FCERI) signaling	137	13	10.1	5.9e-09	11.3
																	Incretin synthesis, secretion, and inactivation	24	2	7.46	0.0035	33.6		CLEC7A (Dectin-1) signaling	100	6	8.68	1.6e-05	16.5		Signaling by FGFR1 in disease	37	4	8.35	0.00016	22.3		Nucleotide-binding domain, leucine rich repeat containing receptor (NLR) signaling pathways	56	8	10.1	3.1e-07	17.4
																	RUNX2 regulates osteoblast differentiation	24	2	7.46	0.0035	33.6		Interleukin-17 signaling	71	5	8.67	4.1e-05	19.3		Apoptosis	171	9	8.27	2.9e-06	10.8		Formation of Incision Complex in GG-NER	43	7	10.1	7.3e-07	20.2
																	TRAF6 mediated NF-kB activation	24	2	7.46	0.0035	33.6		G0 and Early G1	27	3	8.62	0.00046	31		PTEN Regulation	139	8	8.23	5.6e-06	11.7		Signaling by SCF-KIT	43	7	10.1	7.3e-07	20.2
																	Formation of TC-NER Pre-Incision Complex	53	3	7.41	0.0011	22.7		Signaling by FGFR2	72	5	8.6	4.4e-05	19		Regulated Necrosis	58	5	8.23	6.4e-05	17.6		Activation of BAD and translocation to mitochondria	15	4	10	3.1e-05	37.1
																	C-type lectin receptors (CLRs)	140	5	7.39	0.00016	14.6		Fc epsilon receptor (FCERI) signaling	137	7	8.54	8e-06	14.1		FLT3 Signaling	38	4	8.23	0.00017	21.7		GRB2:SOS provides linkage to MAPK signaling for Integrins	15	4	10	3.1e-05	37.1
																	SARS-CoV Infections	414	9	7.37	1.2e-05	9.52		Interleukin-3, Interleukin-5 and GM-CSF signaling	48	4	8.51	0.00013	22.9		eNOS activation	10	2	8.23	0.0026	45.1		InlB-mediated entry of Listeria monocytogenes into host cell	15	4	10	3.1e-05	37.1
																	Calnexin/calreticulin cycle	25	2	7.3	0.0038	32.2		PTEN Regulation	139	7	8.47	8.6e-06	13.9		Interleukin-21 signaling	10	2	8.23	0.0026	45.1		Mismatch Repair	15	4	10	3.1e-05	37.1
																	Glycogen metabolism	25	2	7.3	0.0038	32.2		FLT3 signaling in disease	28	3	8.45	0.00051	29.8		Regulation of FOXO transcriptional activity by acetylation	10	2	8.23	0.0026	45.1		Signal regulatory protein family interactions	15	4	10	3.1e-05	37.1
																	Inactivation of CSF3 (G-CSF) signaling	25	2	7.3	0.0038	32.2		Pre-NOTCH Expression and Processing	49	4	8.41	0.00014	22.4		RUNX1 and FOXP3 control the development of regulatory T lymphocytes (Tregs)	10	2	8.23	0.0026	45.1		Interleukin-17 signaling	71	9	9.96	1.4e-07	15.3
																	Viral Infection Pathways	705	12	7.29	3.8e-06	7.91		Formation of axial mesoderm	13	2	8.37	0.0025	44.5		RUNX3 regulates p14-ARF	10	2	8.23	0.0026	45.1		RAB GEFs exchange GTP for GDP on RABs	88	10	9.85	7.6e-08	13.6
																	Signaling by WNT	268	7	7.27	4.3e-05	11		Loss of function of MECP2 in Rett syndrome	13	2	8.37	0.0025	44.5		Tetrahydrobiopterin (BH4) synthesis, recycling, salvage and regulation	10	2	8.23	0.0026	45.1		APC/C:Cdc20 mediated degradation of Cyclin B	24	5	9.82	1e-05	27
																	Chromatin modifying enzymes	204	6	7.23	8.6e-05	12.2		PRC2 methylates histones and DNA	13	2	8.37	0.0025	44.5		JNK (c-Jun kinases) phosphorylation and activation mediated by activated human TAK1	22	3	8.21	0.00056	28.8		RUNX2 regulates osteoblast differentiation	24	5	9.82	1e-05	27
																	Nuclear events mediated by NFE2L2	96	4	7.22	0.00046	16.8		Repression of WNT target genes	13	2	8.37	0.0025	44.5		Regulation of signaling by CBL	22	3	8.21	0.00056	28.8		Telomere C-strand (Lagging Strand) Synthesis	34	6	9.81	3.1e-06	22.1
																	Antiviral mechanism by IFN-stimulated genes	148	5	7.15	0.0002	13.8		Suppression of phagosomal maturation	13	2	8.37	0.0025	44.5		C-type lectin receptors (CLRs)	140	8	8.19	5.8e-06	11.6		ERCC6 (CSB) and EHMT2 (G9a) positively regulate rRNA expression	16	4	9.7	3.9e-05	34
																	APC-Cdc20 mediated degradation of Nek2A	26	2	7.15	0.004	30.8		EGR2 and SOX10-mediated initiation of Schwann cell myelination	29	3	8.29	0.00056	28.6		Interleukin-4 and Interleukin-13 signaling	110	7	8.17	1.2e-05	12.9		Signaling by FLT3 ITD and TKD mutants	16	4	9.7	3.9e-05	34
																	Downregulation of TGF-beta receptor signaling	26	2	7.15	0.004	30.8		Mitophagy	29	3	8.29	0.00056	28.6		Transcriptional Regulation by VENTX	39	4	8.11	0.00019	21.1		TGF-beta receptor signaling in EMT (epithelial to mesenchymal transition)	16	4	9.7	3.9e-05	34
																	Meiotic recombination	26	2	7.15	0.004	30.8		The role of GTSE1 in G2/M progression after G2 checkpoint	78	5	8.22	6.2e-05	17.5		Cell Cycle, Mitotic	497	16	8.05	1.4e-07	6.89		The NLRP3 inflammasome	16	4	9.7	3.9e-05	34
																	Purinergic signaling in leishmaniasis infection	26	2	7.15	0.004	30.8		Nucleotide Excision Repair	110	6	8.21	2.6e-05	14.9		activated TAK1 mediates p38 MAPK activation	23	3	8.02	0.00064	27.4		TRAF6-mediated induction of TAK1 complex within TLR4 complex	16	4	9.7	3.9e-05	34
																	Pyroptosis	26	2	7.15	0.004	30.8		Antiviral mechanism by IFN-stimulated genes	148	7	8.16	1.2e-05	13		IKK complex recruitment mediated by RIP1	23	3	8.02	0.00064	27.4		VLDLR internalisation and degradation	16	4	9.7	3.9e-05	34
																	Mitotic G1 phase and G1/S transition	149	5	7.13	0.00021	13.7		Signaling by MET	79	5	8.16	6.3e-05	17.2		Response of Mtb to phagocytosis	23	3	8.02	0.00064	27.4		Post-translational protein modification	1348	47	9.64	1.7e-13	4.64
																	Interleukin-1 family signaling	151	5	7.07	0.00022	13.5		Formation of TC-NER Pre-Incision Complex	53	4	8.06	0.00019	20.5		Interleukin-1 signaling	114	7	8	1.5e-05	12.4		Defective Intrinsic Pathway for Apoptosis	25	5	9.6	1.2e-05	25.7
																	CLEC7A (Dectin-1) signaling	100	4	7.05	0.00053	16.1		Glycogen synthesis	14	2	8.04	0.0029	40.7		Regulation of PTEN gene transcription	61	5	7.99	7.7e-05	16.6		Downstream signaling of activated FGFR3	25	5	9.6	1.2e-05	25.7
																	Cellular responses to stimuli	746	12	7.01	5.6e-06	7.45		Interleukin-15 signaling	14	2	8.04	0.0029	40.7		Antiviral mechanism by IFN-stimulated genes	148	8	7.92	8.2e-06	11		NOTCH3 Activation and Transmission of Signal to the Nucleus	25	5	9.6	1.2e-05	25.7
																	G0 and Early G1	27	2	7	0.0042	29.6		Physiological factors	14	2	8.04	0.0029	40.7		TP53 Regulates Transcription of DNA Repair Genes	62	5	7.92	8.3e-05	16.3		Signaling by NTRK2 (TRKB)	25	5	9.6	1.2e-05	25.7
																	Infection with Mycobacterium tuberculosis	27	2	7	0.0042	29.6		Regulation of innate immune responses to cytosolic DNA	14	2	8.04	0.0029	40.7		Mitotic G1 phase and G1/S transition	149	8	7.89	8.5e-06	10.9		Mitotic G1 phase and G1/S transition	149	13	9.57	1.5e-08	10.3
																	Resolution of D-loop Structures through Synthesis-Dependent Strand Annealing (SDSA)	27	2	7	0.0042	29.6		SHC1 events in EGFR signaling	14	2	8.04	0.0029	40.7		APC/C:Cdc20 mediated degradation of Cyclin B	24	3	7.83	0.00071	26.1		Interleukin-1 family signaling	151	13	9.49	1.8e-08	10.1
																	Factors involved in megakaryocyte development and platelet production	154	5	6.99	0.00024	13.2		SHC1 events in ERBB4 signaling	14	2	8.04	0.0029	40.7		RUNX2 regulates osteoblast differentiation	24	3	7.83	0.00071	26.1		The role of GTSE1 in G2/M progression after G2 checkpoint	78	9	9.42	3.1e-07	13.7
																	Budding and maturation of HIV virion	28	2	6.87	0.0044	28.5		Gastrulation	115	6	8	3.1e-05	14.2		Interleukin-1 family signaling	151	8	7.82	9.3e-06	10.7		Mitotic G2-G2/M phases	198	15	9.41	6.8e-09	8.9
																	DNA Damage/Telomere Stress Induced Senescence	28	2	6.87	0.0044	28.5		Regulation of MECP2 expression and activity	31	3	8	0.00067	26.6		Apoptotic cleavage of cell adhesion proteins	11	2	7.82	0.0031	40.1		Activation of IRF3, IRF7 mediated by TBK1, IKBKE	17	4	9.38	4.8e-05	31.4
																	FLT3 signaling in disease	28	2	6.87	0.0044	28.5		RUNX2 regulates bone development	31	3	8	0.00067	26.6		Formation of the anterior neural plate	11	2	7.82	0.0031	40.1		Signaling by cytosolic FGFR1 fusion mutants	17	4	9.38	4.8e-05	31.4
																	Notch-HLH transcription pathway	28	2	6.87	0.0044	28.5		Mitotic G2-G2/M phases	198	8	7.95	8e-06	11.2		Interleukin-27 signaling	11	2	7.82	0.0031	40.1		Signaling by NTRK3 (TRKC)	17	4	9.38	4.8e-05	31.4
																	Activation of anterior HOX genes in hindbrain development during early embryogenesis	62	3	6.8	0.0017	19.2		Degradation of beta-catenin by the destruction complex	84	5	7.88	8.2e-05	16.1		Interleukin-6 signaling	11	2	7.82	0.0031	40.1		Translesion synthesis by POLK	17	4	9.38	4.8e-05	31.4
																	FOXO-mediated transcription of oxidative stress, metabolic and neuronal genes	29	2	6.74	0.0047	27.4		Nuclear signaling by ERBB4	32	3	7.86	0.00073	25.7		Regulation of BACH1 activity	11	2	7.82	0.0031	40.1		Signaling by FGFR1 in disease	37	6	9.36	5.1e-06	20
																	G1/S-Specific Transcription	29	2	6.74	0.0047	27.4		Programmed Cell Death	203	8	7.83	9.3e-06	10.9		Death Receptor Signaling	152	8	7.79	9.7e-06	10.7		Programmed Cell Death	203	15	9.26	9.3e-09	8.65
																	Translation of SARS-CoV-1 Structural Proteins	29	2	6.74	0.0047	27.4		Constitutive Signaling by EGFRvIII	15	2	7.75	0.0032	37.6		MAPK6/MAPK4 signaling	90	6	7.77	4.1e-05	13.4		Activation of the AP-1 family of transcription factors	10	3	9.26	0.00022	43.5
																	Maternal to zygotic transition (MZT)	63	3	6.73	0.0017	18.9		Glycogen storage diseases	15	2	7.75	0.0032	37.6		Rab regulation of trafficking	120	7	7.76	2e-05	11.8		MAPK3 (ERK1) activation	10	3	9.26	0.00022	43.5
																	Dual incision in TC-NER	65	3	6.62	0.0018	18.3		GRB2:SOS provides linkage to MAPK signaling for Integrins	15	2	7.75	0.0032	37.6		Factors involved in megakaryocyte development and platelet production	154	8	7.73	1.1e-05	10.5		POU5F1 (OCT4), SOX2, NANOG repress genes related to differentiation	10	3	9.26	0.00022	43.5
																	FOXO-mediated transcription	65	3	6.62	0.0018	18.3		Negative regulation of FLT3	15	2	7.75	0.0032	37.6		Positive epigenetic regulation of rRNA expression	43	4	7.68	0.00026	18.9		Recognition and association of DNA glycosylase with site containing an affected purine	10	3	9.26	0.00022	43.5
																	Activation of BH3-only proteins	30	2	6.62	0.0049	26.4		Signaling by NOTCH1 HD Domain Mutants in Cancer	15	2	7.75	0.0032	37.6		Signaling by SCF-KIT	43	4	7.68	0.00026	18.9		Regulation of FOXO transcriptional activity by acetylation	10	3	9.26	0.00022	43.5
																	Recognition of DNA damage by PCNA-containing replication complex	30	2	6.62	0.0049	26.4		Signal regulatory protein family interactions	15	2	7.75	0.0032	37.6		NOTCH3 Activation and Transmission of Signal to the Nucleus	25	3	7.66	0.0008	24.9		RUNX3 regulates p14-ARF	10	3	9.26	0.00022	43.5
																	Signaling by CSF3 (G-CSF)	30	2	6.62	0.0049	26.4		TFAP2 (AP-2) family regulates transcription of growth factors and their receptors	15	2	7.75	0.0032	37.6		SARS-CoV-2 activates/modulates innate and adaptive immune responses	123	7	7.64	2.3e-05	11.5		Telomere Maintenance	65	8	9.23	9e-07	14.7
																	Synthesis of active ubiquitin: roles of E1 and E2 enzymes	30	2	6.62	0.0049	26.4		Signaling by NOTCH2	33	3	7.73	0.00079	24.8		Epigenetic regulation of gene expression	125	7	7.57	2.5e-05	11.3		Attenuation phase	27	5	9.2	1.8e-05	23.4
																	Negative regulation of the PI3K/AKT network	113	4	6.57	0.0008	14.1		FCERI mediated NF-kB activation	87	5	7.72	9.5e-05	15.5		Circadian Clock	68	5	7.51	0.00012	14.8		Downstream signaling of activated FGFR4	27	5	9.2	1.8e-05	23.4
																	Cell Cycle, Mitotic	497	9	6.54	4e-05	7.86		Signaling by FGFR	88	5	7.67	0.0001	15.4		ALK mutants bind TKIs	12	2	7.47	0.0035	36.1		Integrin signaling	27	5	9.2	1.8e-05	23.4
																	Activated NOTCH1 Transmits Signal to the Nucleus	31	2	6.5	0.0051	25.5		Meiosis	58	4	7.66	0.00027	18.6		Interleukin-35 Signalling	12	2	7.47	0.0035	36.1		Extension of Telomeres	51	7	9.19	2.3e-06	16.5
																	Endosomal Sorting Complex Required For Transport (ESCRT)	31	2	6.5	0.0051	25.5		Regulated Necrosis	58	4	7.66	0.00027	18.6		Josephin domain DUBs	12	2	7.47	0.0035	36.1		Cellular response to heat stress	99	10	9.17	2.1e-07	11.9
																	Regulation of MECP2 expression and activity	31	2	6.5	0.0051	25.5		Signaling by PDGF	58	4	7.66	0.00027	18.6		Regulation of localization of FOXO transcription factors	12	2	7.47	0.0035	36.1		Signaling by NOTCH4	82	9	9.15	4.5e-07	12.9
																	RHO GTPases activate IQGAPs	31	2	6.5	0.0051	25.5		Ub-specific processing proteases	165	7	7.65	2.3e-05	11.6		TICAM1-dependent activation of IRF3/IRF7	12	2	7.47	0.0035	36.1		Gastrin-CREB signalling pathway via PKC and MAPK	18	4	9.1	6e-05	29.2
																	RUNX2 regulates bone development	31	2	6.5	0.0051	25.5		Cellular response to chemical stress	211	8	7.64	1.2e-05	10.5		TP53 Regulates Transcription of Caspase Activators and Caspases	12	2	7.47	0.0035	36.1		PI-3K cascade:FGFR3	18	4	9.1	6e-05	29.2
																	Circadian Clock	68	3	6.45	0.002	17.4		Signaling by WNT	268	9	7.52	8e-06	9.34		SARS-CoV-2 Infection	291	11	7.41	3.7e-06	7.74		Tie2 Signaling	18	4	9.1	6e-05	29.2
																	HDACs deacetylate histones	32	2	6.39	0.0054	24.7		Apoptosis	171	7	7.49	2.7e-05	11.2		Toll-like Receptor Cascades	165	8	7.41	1.7e-05	9.77		C-type lectin receptors (CLRs)	140	12	9.09	7e-08	10
																	RIPK1-mediated regulated necrosis	32	2	6.39	0.0054	24.7		Leishmania infection	171	7	7.49	2.7e-05	11.2		Negative epigenetic regulation of rRNA expression	46	4	7.39	0.00032	17.6		G1/S DNA Damage Checkpoints	67	8	9.06	1.1e-06	14.2
																	Termination of translesion DNA synthesis	32	2	6.39	0.0054	24.7		Assembly Of The HIV Virion	16	2	7.49	0.0035	35		Cellular response to heat stress	99	6	7.34	6.8e-05	12.1		RHO GTPase Effectors	262	17	9.05	5.8e-09	7.6
																	RUNX1 regulates transcription of genes involved in differentiation of HSCs	70	3	6.35	0.0021	16.9		Germ layer formation at gastrulation	16	2	7.49	0.0035	35		Attenuation phase	27	3	7.34	0.00099	22.8		Intrinsic Pathway for Apoptosis	53	7	8.99	2.9e-06	15.8
																	AURKA Activation by TPX2	71	3	6.29	0.0022	16.6		Regulation of KIT signaling	16	2	7.49	0.0035	35		Infection with Mycobacterium tuberculosis	27	3	7.34	0.00099	22.8		MAP2K and MAPK activation	40	6	8.95	8e-06	18.2
																	Diseases of carbohydrate metabolism	33	2	6.28	0.0057	23.9		SARS-CoV-1 targets host intracellular signalling and regulatory pathways	16	2	7.49	0.0035	35		Integrin signaling	27	3	7.34	0.00099	22.8		SARS-CoV-2 activates/modulates innate and adaptive immune responses	123	11	8.93	1.7e-07	10.4
																	TNFR1-induced NF-kappa-B signaling pathway	33	2	6.28	0.0057	23.9		TGF-beta receptor signaling in EMT (epithelial to mesenchymal transition)	16	2	7.49	0.0035	35		VEGFR2 mediated vascular permeability	27	3	7.34	0.00099	22.8		Insulin receptor signalling cascade	54	7	8.89	3.3e-06	15.5
																	ISG15 antiviral mechanism	72	3	6.24	0.0022	16.4		Transcription of E2F targets under negative control by p107 (RBL1) and p130 (RBL2) in complex with HDAC1	16	2	7.49	0.0035	35		AURKA Activation by TPX2	71	5	7.32	0.00014	14.1		Signaling by Type 1 Insulin-like Growth Factor 1 Receptor (IGF1R)	54	7	8.89	3.3e-06	15.5
																	Signaling by FGFR2	72	3	6.24	0.0022	16.4		VLDLR internalisation and degradation	16	2	7.49	0.0035	35		Interleukin-17 signaling	71	5	7.32	0.00014	14.1		FOXO-mediated transcription of oxidative stress, metabolic and neuronal genes	29	5	8.84	2.4e-05	21.4
																	Epigenetic regulation of gene expression	125	4	6.19	0.0011	12.7		Transcriptional Regulation by MECP2	61	4	7.44	0.00031	17.7		CLEC7A (Dectin-1) signaling	100	6	7.3	7e-05	12		Mitophagy	29	5	8.84	2.4e-05	21.4
																	Late endosomal microautophagy	34	2	6.18	0.0059	23.1		Signaling by FGFR in disease	62	4	7.38	0.00033	17.3		Cyclin D associated events in G1	47	4	7.3	0.00035	17.1		TICAM1, RIP1-mediated IKK complex recruitment	19	4	8.83	7.4e-05	27.2
																	Negative regulators of DDX58/IFIH1 signaling	34	2	6.18	0.0059	23.1		NOD1/2 Signaling Pathway	36	3	7.37	0.001	22.5		Signaling by FGFR2	72	5	7.26	0.00015	13.9		Translesion Synthesis by POLH	19	4	8.83	7.4e-05	27.2
																	Nonhomologous End-Joining (NHEJ)	34	2	6.18	0.0059	23.1		RUNX1 regulates genes involved in megakaryocyte differentiation and platelet function	36	3	7.37	0.001	22.5		Leishmania infection	171	8	7.24	2.1e-05	9.4		Signaling by VEGF	106	10	8.8	3.9e-07	11
																	N-glycan trimming in the ER and Calnexin/Calreticulin cycle	34	2	6.18	0.0059	23.1		RUNX1 interacts with co-factors whose precise effect on RUNX1 targets is not known	37	3	7.26	0.0011	21.9		Interleukin-3, Interleukin-5 and GM-CSF signaling	48	4	7.22	0.00037	16.8		Activated NTRK2 signals through FRS2 and FRS3	11	3	8.8	0.00029	38.1
																	Transcriptional Regulation by E2F6	34	2	6.18	0.0059	23.1		Activation of IRF3, IRF7 mediated by TBK1, IKBKE	17	2	7.25	0.0039	32.6		FLT3 signaling in disease	28	3	7.2	0.0011	21.9		Interleukin-6 signaling	11	3	8.8	0.00029	38.1
																	Cytokine Signaling in Immune system	770	11	6.16	3.5e-05	6.41		Regulation of RUNX1 Expression and Activity	17	2	7.25	0.0039	32.6		Fc epsilon receptor (FCERI) signaling	137	7	7.15	4.3e-05	10.2		NFE2L2 regulating tumorigenic genes	11	3	8.8	0.00029	38.1
																	Cell death signalling via NRAGE, NRIF and NADE	74	3	6.15	0.0024	15.9		RIP-mediated NFkB activation via ZBP1	17	2	7.25	0.0039	32.6		Formation of axial mesoderm	13	2	7.15	0.0041	32.8		Regulated proteolysis of p75NTR	11	3	8.8	0.00029	38.1
																	HCMV Early Events	74	3	6.15	0.0024	15.9		Signaling by NTRK3 (TRKC)	17	2	7.25	0.0039	32.6		Loss of function of MECP2 in Rett syndrome	13	2	7.15	0.0041	32.8		Signaling by FGFR4 in disease	11	3	8.8	0.00029	38.1
																	Interferon Signaling	267	6	6.12	0.00031	9.21		Translesion synthesis by POLK	17	2	7.25	0.0039	32.6		PRC2 methylates histones and DNA	13	2	7.15	0.0041	32.8		Antiviral mechanism by IFN-stimulated genes	148	12	8.78	1.2e-07	9.41
																	Cellular response to hypoxia	75	3	6.1	0.0024	15.7		Dual incision in TC-NER	65	4	7.18	0.00039	16.5		Repression of WNT target genes	13	2	7.15	0.0041	32.8		Apoptosis	171	13	8.77	7.4e-08	8.82
																	Resolution of D-Loop Structures	35	2	6.08	0.0062	22.4		FOXO-mediated transcription	65	4	7.18	0.00039	16.5		Pre-NOTCH Expression and Processing	49	4	7.13	0.0004	16.4		Hemostasis	608	27	8.74	4.7e-10	5.35
																	SARS-CoV-1 modulates host translation machinery	35	2	6.08	0.0062	22.4		FLT3 Signaling	38	3	7.15	0.0012	21.3		Extra-nuclear estrogen signaling	75	5	7.09	0.00018	13.3		Stabilization of p53	56	7	8.71	4.2e-06	14.8
																	Interferon alpha/beta signaling	77	3	6.01	0.0026	15.3		Gastrin-CREB signalling pathway via PKC and MAPK	18	2	7.03	0.0043	30.6		PKR-mediated signaling	75	5	7.09	0.00018	13.3		Activation of BH3-only proteins	30	5	8.67	2.8e-05	20.5
																	SARS-CoV-2-host interactions	198	5	6	0.00066	10.2		MECP2 regulates neuronal receptors and channels	18	2	7.03	0.0043	30.6		EGR2 and SOX10-mediated initiation of Schwann cell myelination	29	3	7.06	0.0012	21		Downstream signaling of activated FGFR2	30	5	8.67	2.8e-05	20.5
																	NOD1/2 Signaling Pathway	36	2	5.99	0.0065	21.8		PI-3K cascade:FGFR3	18	2	7.03	0.0043	30.6		Mitophagy	29	3	7.06	0.0012	21		FGFR1 mutant receptor activation	30	5	8.67	2.8e-05	20.5
																	RUNX1 regulates genes involved in megakaryocyte differentiation and platelet function	36	2	5.99	0.0065	21.8		SHC-mediated cascade:FGFR3	18	2	7.03	0.0043	30.6		Potential therapeutics for SARS	106	6	7.05	9.1e-05	11.3		HSF1 activation	30	5	8.67	2.8e-05	20.5
																	Signaling by MET	79	3	5.92	0.0027	14.9		Cell Cycle, Mitotic	497	12	7	4.7e-06	6.9		HSF1 activation	30	3	6.92	0.0013	20.3		Recognition of DNA damage by PCNA-containing replication complex	30	5	8.67	2.8e-05	20.5
																	HDR through Single Strand Annealing (SSA)	37	2	5.9	0.0067	21.1		Circadian Clock	68	4	7	0.00046	15.7		Nucleotide Excision Repair	110	6	6.89	0.00011	10.8		Transcriptional regulation of pluripotent stem cells	30	5	8.67	2.8e-05	20.5
																	Plasma lipoprotein clearance	37	2	5.9	0.0067	21.1		RET signaling	40	3	6.95	0.0013	20.1		Amyloid fiber formation	52	4	6.89	0.00049	15.4		Interleukin-4 and Interleukin-13 signaling	110	10	8.6	5.3e-07	10.6
																	RUNX1 interacts with co-factors whose precise effect on RUNX1 targets is not known	37	2	5.9	0.0067	21.1		RUNX1 regulates transcription of genes involved in differentiation of HSCs	70	4	6.88	0.00051	15.2		Signaling by MET	79	5	6.88	0.00022	12.6		Negative regulation of MAPK pathway	43	6	8.59	1.2e-05	16.7
																	Recruitment of mitotic centrosome proteins and complexes	80	3	5.88	0.0028	14.7		Mitotic G1 phase and G1/S transition	149	6	6.86	0.00011	10.8		AKT phosphorylates targets in the cytosol	14	2	6.87	0.0046	30.1		Positive epigenetic regulation of rRNA expression	43	6	8.59	1.2e-05	16.7
																	Fc epsilon receptor (FCERI) signaling	137	4	5.86	0.0014	11.6		SARS-CoV-2-host interactions	198	7	6.84	6.2e-05	9.58		Early Phase of HIV Life Cycle	14	2	6.87	0.0046	30.1		FRS-mediated FGFR3 signaling	20	4	8.58	8.9e-05	25.5
																	Downstream signaling events of B Cell Receptor (BCR)	81	3	5.84	0.0029	14.5		Transcription of E2F targets under negative control by DREAM complex	19	2	6.83	0.0048	28.8		Glycogen synthesis	14	2	6.87	0.0046	30.1		PI-3K cascade:FGFR4	20	4	8.58	8.9e-05	25.5
																	Selective autophagy	81	3	5.84	0.0029	14.5		Translesion Synthesis by POLH	19	2	6.83	0.0048	28.8		Interleukin-15 signaling	14	2	6.87	0.0046	30.1		SUMOylation of transcription factors	20	4	8.58	8.9e-05	25.5
																	Apoptotic cleavage of cellular proteins	38	2	5.81	0.007	20.5		AURKA Activation by TPX2	71	4	6.82	0.00053	15		Metabolism of nitric oxide: NOS3 activation and regulation	14	2	6.87	0.0046	30.1		Chromosome Maintenance	92	9	8.53	1.1e-06	11.4
																	DNA Damage Recognition in GG-NER	38	2	5.81	0.007	20.5		ISG15 antiviral mechanism	72	4	6.77	0.00056	14.8		Regulation of innate immune responses to cytosolic DNA	14	2	6.87	0.0046	30.1		Signaling by PDGF	58	7	8.53	5.3e-06	14.3
																	FLT3 Signaling	38	2	5.81	0.007	20.5		Interleukin-4 and Interleukin-13 signaling	110	5	6.73	0.00026	12.1		Regulation of TP53 Activity through Association with Co-factors	14	2	6.87	0.0046	30.1		Chromatin modifying enzymes	204	14	8.51	7.4e-08	7.94
																	Transcriptional regulation by the AP-2 (TFAP2) family of transcription factors	38	2	5.81	0.007	20.5		Factors involved in megakaryocyte development and platelet production	154	6	6.72	0.00013	10.5		SHC1 events in EGFR signaling	14	2	6.87	0.0046	30.1		Downstream signaling of activated FGFR1	31	5	8.51	3.3e-05	19.7
																	Signaling by NOTCH4	82	3	5.79	0.0029	14.3		Chromatin modifying enzymes	204	7	6.71	7.2e-05	9.29		SHC1 events in ERBB4 signaling	14	2	6.87	0.0046	30.1		Signaling by moderate kinase activity BRAF mutants	44	6	8.48	1.3e-05	16.3
																	Cellular response to chemical stress	211	5	5.77	0.00086	9.52		PKMTs methylate histone lysines	43	3	6.67	0.0016	18.6		TP53 Regulates Transcription of Genes Involved in G1 Cell Cycle Arrest	14	2	6.87	0.0046	30.1		Interleukin-1 signaling	114	10	8.41	7.3e-07	10.1
																	Fanconi Anemia Pathway	39	2	5.73	0.0073	20		Cell death signalling via NRAGE, NRIF and NADE	74	4	6.66	0.00061	14.4		Recruitment of mitotic centrosome proteins and complexes	80	5	6.83	0.00024	12.4		ALK mutants bind TKIs	12	3	8.4	0.00037	33.8
																	Translesion synthesis by Y family DNA polymerases bypasses lesions on DNA template	39	2	5.73	0.0073	20		ER Quality Control Compartment (ERQC)	20	2	6.64	0.0051	27.2		Formation of TC-NER Pre-Incision Complex	53	4	6.82	0.00052	15		Josephin domain DUBs	12	3	8.4	0.00037	33.8
																	Clathrin-mediated endocytosis	145	4	5.66	0.0017	10.9		FRS-mediated FGFR3 signaling	20	2	6.64	0.0051	27.2		Nuclear Receptor transcription pathway	53	4	6.82	0.00052	15		POU5F1 (OCT4), SOX2, NANOG activate genes related to proliferation	12	3	8.4	0.00037	33.8
																	FCERI mediated NF-kB activation	87	3	5.6	0.0033	13.5		PI-3K cascade:FGFR4	20	2	6.64	0.0051	27.2		Regulation of MECP2 expression and activity	31	3	6.8	0.0014	19.5		Regulation of localization of FOXO transcription factors	12	3	8.4	0.00037	33.8
																	Regulation of mRNA stability by proteins that bind AU-rich elements	87	3	5.6	0.0033	13.5		SHC-mediated cascade:FGFR4	20	2	6.64	0.0051	27.2		RUNX2 regulates bone development	31	3	6.8	0.0014	19.5		TICAM1-dependent activation of IRF3/IRF7	12	3	8.4	0.00037	33.8
																	Dual Incision in GG-NER	41	2	5.57	0.008	19		Signaling by Hippo	20	2	6.64	0.0051	27.2		Selective autophagy	81	5	6.77	0.00024	12.2		Fcgamma receptor (FCGR) dependent phagocytosis	95	9	8.37	1.5e-06	11
																	APC/C-mediated degradation of cell cycle proteins	88	3	5.56	0.0034	13.3		Signalling to RAS	20	2	6.64	0.0051	27.2		Signaling by ALK in cancer	54	4	6.74	0.00055	14.7		Termination of translesion DNA synthesis	32	5	8.36	3.8e-05	19
																	RAB GEFs exchange GTP for GDP on RABs	88	3	5.56	0.0034	13.3		SUMOylation of transcription factors	20	2	6.64	0.0051	27.2		RIPK1-mediated regulated necrosis	32	3	6.68	0.0016	18.9		Inflammasomes	21	4	8.36	0.00011	24
																	Signaling by FGFR	88	3	5.56	0.0034	13.3		TP53 Regulates Transcription of Genes Involved in Cytochrome C Release	20	2	6.64	0.0051	27.2		Degradation of beta-catenin by the destruction complex	84	5	6.63	0.00029	11.8		Negative regulation of MET activity	21	4	8.36	0.00011	24
																	Influenza Infection	154	4	5.46	0.0019	10.3		PKR-mediated signaling	75	4	6.61	0.00064	14.2		Glycogen storage diseases	15	2	6.62	0.0052	27.8		NPAS4 regulates expression of target genes	21	4	8.36	0.00011	24
																	Eukaryotic Translation Elongation	92	3	5.42	0.0038	12.7		Interleukin-2 family signaling	44	3	6.59	0.0017	18.1		GRB2:SOS provides linkage to MAPK signaling for Integrins	15	2	6.62	0.0052	27.8		PCNA-Dependent Long Patch Base Excision Repair	21	4	8.36	0.00011	24
																	Aggrephagy	43	2	5.42	0.0086	18		RNA Polymerase I Transcription Initiation	44	3	6.59	0.0017	18.1		Negative regulation of FLT3	15	2	6.62	0.0052	27.8		PI-3K cascade:FGFR1	21	4	8.36	0.00011	24
																	E3 ubiquitin ligases ubiquitinate target proteins	43	2	5.42	0.0086	18		Interferon Signaling	267	8	6.58	5.2e-05	8.17		Signaling by NOTCH1 HD Domain Mutants in Cancer	15	2	6.62	0.0052	27.8		Activation of anterior HOX genes in hindbrain development during early embryogenesis	62	7	8.2	8.1e-06	13.2
																	Formation of Incision Complex in GG-NER	43	2	5.42	0.0086	18		Interferon alpha/beta signaling	77	4	6.51	0.0007	13.8		Signal regulatory protein family interactions	15	2	6.62	0.0052	27.8		Signaling by FGFR in disease	62	7	8.2	8.1e-06	13.2
																	Homologous DNA Pairing and Strand Exchange	43	2	5.42	0.0086	18		PI-3K cascade:FGFR1	21	2	6.47	0.0056	25.8		Cyclin A:Cdk2-associated events at S phase entry	85	5	6.58	0.0003	11.6		Rab regulation of trafficking	120	10	8.15	1.1e-06	9.59
																	Negative regulation of MAPK pathway	43	2	5.42	0.0086	18		Regulation of FZD by ubiquitination	21	2	6.47	0.0056	25.8		CD28 co-stimulation	33	3	6.56	0.0017	18.2		FRS-mediated FGFR4 signaling	22	4	8.14	0.00013	22.7
																	PKMTs methylate histone lysines	43	2	5.42	0.0086	18		SHC-mediated cascade:FGFR1	21	2	6.47	0.0056	25.8		Signaling by NOTCH2	33	3	6.56	0.0017	18.2		JNK (c-Jun kinases) phosphorylation and activation mediated by activated human TAK1	22	4	8.14	0.00013	22.7
																	Activation of NMDA receptors and postsynaptic events	93	3	5.38	0.0038	12.6		ZBP1(DAI) mediated induction of type I IFNs	21	2	6.47	0.0056	25.8		FCERI mediated NF-kB activation	87	5	6.49	0.00033	11.3		PINK1-PRKN Mediated Mitophagy	22	4	8.14	0.00013	22.7
																	Recruitment of NuMA to mitotic centrosomes	93	3	5.38	0.0038	12.6		Signaling by the B Cell Receptor (BCR)	118	5	6.45	0.00034	11.3		Regulation of mRNA stability by proteins that bind AU-rich elements	87	5	6.49	0.00033	11.3		RAS processing	22	4	8.14	0.00013	22.7
																	RNA Polymerase I Transcription Initiation	44	2	5.35	0.0089	17.6		TCR signaling	119	5	6.42	0.00035	11.2		Signaling by PDGF	58	4	6.47	0.00071	13.7		RHO GTPases activate PKNs	34	5	8.08	4.8e-05	17.7
																	TBC/RABGAPs	44	2	5.35	0.0089	17.6		Recruitment of mitotic centrosome proteins and complexes	80	4	6.37	0.00079	13.2		Vesicle-mediated transport	671	16	6.45	4.7e-06	5.01		Signalling to ERKs	34	5	8.08	4.8e-05	17.7
																	Anchoring of the basal body to the plasma membrane	95	3	5.31	0.004	12.3		Cyclin D associated events in G1	47	3	6.35	0.002	16.9		RHO GTPases activate PKNs	34	3	6.45	0.0018	17.7		IRS-mediated signalling	48	6	8.06	2.1e-05	14.8
																	Ub-specific processing proteases	165	4	5.23	0.0024	9.55		Downstream signaling events of B Cell Receptor (BCR)	81	4	6.32	0.00082	13		Signalling to ERKs	34	3	6.45	0.0018	17.7		Clathrin-mediated endocytosis	145	11	8.05	7.7e-07	8.7
																	HCMV Infection	98	3	5.22	0.0042	11.9		Selective autophagy	81	4	6.32	0.00082	13		Transcriptional Regulation by E2F6	34	3	6.45	0.0018	17.7		Loss of function of MECP2 in Rett syndrome	13	3	8.04	0.00047	30.5
																	Apoptotic execution phase	46	2	5.22	0.0096	16.8		Chaperone Mediated Autophagy	22	2	6.31	0.0059	24.5		Signaling by FGFR	88	5	6.44	0.00034	11.2		Leishmania infection	171	12	7.99	5.2e-07	8.04
																	Negative epigenetic regulation of rRNA expression	46	2	5.22	0.0096	16.8		FRS-mediated FGFR4 signaling	22	2	6.31	0.0059	24.5		Assembly Of The HIV Virion	16	2	6.39	0.0058	25.8		activated TAK1 mediates p38 MAPK activation	23	4	7.94	0.00015	21.5
																	TGF-beta receptor signaling activates SMADs	47	2	5.16	0.01	16.4		NOTCH2 Activation and Transmission of Signal to the Nucleus	22	2	6.31	0.0059	24.5		Rap1 signalling	16	2	6.39	0.0058	25.8		FRS-mediated FGFR1 signaling	23	4	7.94	0.00015	21.5
																	Response of EIF2AK4 (GCN2) to amino acid deficiency	100	3	5.15	0.0044	11.7		PINK1-PRKN Mediated Mitophagy	22	2	6.31	0.0059	24.5		Regulation of KIT signaling	16	2	6.39	0.0058	25.8		IKK complex recruitment mediated by RIP1	23	4	7.94	0.00015	21.5
																	Nervous system development	576	8	5.11	0.00053	5.82		RAS processing	22	2	6.31	0.0059	24.5		Sema3A PAK dependent Axon repulsion	16	2	6.39	0.0058	25.8		PI-3K cascade:FGFR2	23	4	7.94	0.00015	21.5
																	Signaling by Interleukins	459	7	5.11	0.00078	6.29		SARS-CoV-2 activates/modulates innate and adaptive immune responses	123	5	6.29	0.0004	10.8		TGF-beta receptor signaling in EMT (epithelial to mesenchymal transition)	16	2	6.39	0.0058	25.8		Cyclin A:Cdk2-associated events at S phase entry	85	8	7.85	6.4e-06	10.8
																	Leishmania infection	171	4	5.11	0.0026	9.2		RNA Polymerase I Transcription	48	3	6.27	0.0021	16.5		Transcription of E2F targets under negative control by p107 (RBL1) and p130 (RBL2) in complex with HDAC1	16	2	6.39	0.0058	25.8		Nervous system development	576	24	7.83	1.4e-08	4.9
																	DNA Damage Bypass	48	2	5.1	0.01	16.1		TP53 Regulates Transcription of Cell Cycle Genes	49	3	6.2	0.0022	16.2		Membrane Trafficking	624	15	6.28	8.5e-06	5		SARS-CoV-2 Infection	291	16	7.83	1.4e-07	6.32
																	Interleukin-3, Interleukin-5 and GM-CSF signaling	48	2	5.1	0.01	16.1		Global Genome Nucleotide Excision Repair (GG-NER)	84	4	6.18	0.00094	12.6		Transcriptional Regulation by MECP2	61	4	6.28	0.00084	12.9		RHO GTPases Activate WASPs and WAVEs	36	5	7.82	6.2e-05	16.6
																	RNA Polymerase I Transcription	48	2	5.1	0.01	16.1		FRS-mediated FGFR1 signaling	23	2	6.16	0.0063	23.3		Post-translational protein modification	1348	24	6.25	1.7e-06	3.97		RUNX1 regulates genes involved in megakaryocyte differentiation and platelet function	36	5	7.82	6.2e-05	16.6
																	SARS-CoV-2 modulates host translation machinery	49	2	5.04	0.011	15.7		Interleukin-7 signaling	23	2	6.16	0.0063	23.3		NOD1/2 Signaling Pathway	36	3	6.25	0.0021	16.6		Death Receptor Signaling	152	11	7.81	1.2e-06	8.27
																	RHO GTPase Effectors	262	5	5.02	0.0018	7.61		Long-term potentiation	23	2	6.16	0.0063	23.3		RUNX1 regulates genes involved in megakaryocyte differentiation and platelet function	36	3	6.25	0.0021	16.6		Resolution of AP sites via the multiple-nucleotide patch replacement pathway	24	4	7.76	0.00018	20.4
																	Cargo recognition for clathrin-mediated endocytosis	105	3	5	0.0049	11.1		PI-3K cascade:FGFR2	23	2	6.16	0.0063	23.3		Recruitment of NuMA to mitotic centrosomes	93	5	6.23	0.00043	10.6		TRAF6 mediated NF-kB activation	24	4	7.76	0.00018	20.4
																	Post-translational protein modification	1348	13	4.95	0.00021	4.4		Response of Mtb to phagocytosis	23	2	6.16	0.0063	23.3		Signaling by FGFR in disease	62	4	6.22	0.00089	12.7		Early Phase of HIV Life Cycle	14	3	7.72	0.00058	27.7
																	Selenoamino acid metabolism	107	3	4.95	0.0051	10.9		RAB GEFs exchange GTP for GDP on RABs	88	4	6.02	0.0011	12		Interferon Signaling	267	9	6.19	6.6e-05	6.72		Glycogen synthesis	14	3	7.72	0.00058	27.7
																	SRP-dependent cotranslational protein targeting to membrane	111	3	4.84	0.0055	10.5		Growth hormone receptor signaling	24	2	6.01	0.0068	22.2		Activation of IRF3, IRF7 mediated by TBK1, IKBKE	17	2	6.18	0.0064	24.1		Regulation of innate immune responses to cytosolic DNA	14	3	7.72	0.00058	27.7
																	Membrane Trafficking	624	8	4.82	0.00087	5.35		Incretin synthesis, secretion, and inactivation	24	2	6.01	0.0068	22.2		Butyrate Response Factor 1 (BRF1) binds and destabilizes mRNA	17	2	6.18	0.0064	24.1		SHC1 events in ERBB4 signaling	14	3	7.72	0.00058	27.7
																	Intrinsic Pathway for Apoptosis	53	2	4.81	0.012	14.5		Interleukin-6 family signaling	24	2	6.01	0.0068	22.2		Regulation of RUNX1 Expression and Activity	17	2	6.18	0.0064	24.1		HSF1-dependent transactivation	37	5	7.7	7.1e-05	16
																	Nonsense-Mediated Decay (NMD)	114	3	4.76	0.0059	10.2		Amyloid fiber formation	52	3	5.99	0.0026	15.2		RIP-mediated NFkB activation via ZBP1	17	2	6.18	0.0064	24.1		APC/C-mediated degradation of cell cycle proteins	88	8	7.69	8.1e-06	10.4
																	Negative regulation of NOTCH4 signaling	54	2	4.76	0.013	14.2		Intrinsic Pathway for Apoptosis	53	3	5.92	0.0027	14.9		Signaling by NTRK3 (TRKC)	17	2	6.18	0.0064	24.1		RUNX1 regulates transcription of genes involved in differentiation of HSCs	70	7	7.62	1.7e-05	11.5
																	AUF1 (hnRNP D0) binds and destabilizes mRNA	55	2	4.71	0.013	13.9		Calnexin/calreticulin cycle	25	2	5.88	0.0072	21.3		Translesion synthesis by POLK	17	2	6.18	0.0064	24.1		Innate Immune System	1047	34	7.61	3.9e-09	3.96
																	Degradation of AXIN	55	2	4.71	0.013	13.9		Downstream signaling of activated FGFR3	25	2	5.88	0.0072	21.3		Anchoring of the basal body to the plasma membrane	95	5	6.15	0.00047	10.3		Formation of TC-NER Pre-Incision Complex	53	6	7.6	3.5e-05	13.2
																	SCF-beta-TrCP mediated degradation of Emi1	55	2	4.71	0.013	13.9		FRS-mediated FGFR2 signaling	25	2	5.88	0.0072	21.3		HSF1-dependent transactivation	37	3	6.15	0.0023	16.1		FCERI mediated MAPK activation	38	5	7.58	7.9e-05	15.6
																	SARS-CoV-2 Infection	291	5	4.67	0.0026	6.83		Glycogen metabolism	25	2	5.88	0.0072	21.3		Plasma lipoprotein clearance	37	3	6.15	0.0023	16.1		FRS-mediated FGFR2 signaling	25	4	7.58	0.00021	19.4
																	Eukaryotic Translation Initiation	118	3	4.66	0.0063	9.82		NOTCH3 Intracellular Domain Regulates Transcription	25	2	5.88	0.0072	21.3		RUNX1 interacts with co-factors whose precise effect on RUNX1 targets is not known	37	3	6.15	0.0023	16.1		AURKA Activation by TPX2	71	7	7.56	1.8e-05	11.4
																	Signaling by the B Cell Receptor (BCR)	118	3	4.66	0.0063	9.82		Signaling by NTRK2 (TRKB)	25	2	5.88	0.0072	21.3		Nervous system development	576	14	6.11	1.6e-05	5.01		Negative regulation of NOTCH4 signaling	54	6	7.52	3.9e-05	12.9
																	Adherens junctions interactions	56	2	4.66	0.013	13.7		Activation of NMDA receptors and postsynaptic events	93	4	5.82	0.0013	11.3		Signaling by NTRKs	134	6	6.09	0.00028	8.79		Platelet Aggregation (Plug Formation)	39	5	7.46	8.9e-05	15.1
																	SUMOylation of chromatin organization proteins	56	2	4.66	0.013	13.7		Recruitment of NuMA to mitotic centrosomes	93	4	5.82	0.0013	11.3		Dual incision in TC-NER	65	4	6.05	0.001	12.1		Translesion synthesis by Y family DNA polymerases bypasses lesions on DNA template	39	5	7.46	8.9e-05	15.1
																	TCR signaling	119	3	4.63	0.0064	9.74		APC-Cdc20 mediated degradation of Nek2A	26	2	5.75	0.0077	20.4		Gastrin-CREB signalling pathway via PKC and MAPK	18	2	5.99	0.0071	22.6		S Phase	163	11	7.45	2.3e-06	7.66
																	Rab regulation of trafficking	120	3	4.61	0.0065	9.65		Downregulation of TGF-beta receptor signaling	26	2	5.75	0.0077	20.4		MECP2 regulates neuronal receptors and channels	18	2	5.99	0.0071	22.6		Regulation of RUNX3 expression and activity	55	6	7.43	4.2e-05	12.6
																	Degradation of DVL	57	2	4.61	0.014	13.4		Interleukin-20 family signaling	26	2	5.75	0.0077	20.4		PI-3K cascade:FGFR3	18	2	5.99	0.0071	22.6		Glycogen storage diseases	15	3	7.43	0.0007	25.4
																	Formation of RNA Pol II elongation complex	57	2	4.61	0.014	13.4		Pyroptosis	26	2	5.75	0.0077	20.4		RORA activates gene expression	18	2	5.99	0.0071	22.6		Negative regulation of FLT3	15	3	7.43	0.0007	25.4
																	TNF signaling	57	2	4.61	0.014	13.4		Anchoring of the basal body to the plasma membrane	95	4	5.74	0.0014	11		SHC-mediated cascade:FGFR3	18	2	5.99	0.0071	22.6		p130Cas linkage to MAPK signaling for integrins	15	3	7.43	0.0007	25.4
																	Translation of SARS-CoV-2 Structural Proteins	57	2	4.61	0.014	13.4		Reproduction	95	4	5.74	0.0014	11		Platelet Aggregation (Plug Formation)	39	3	5.97	0.0026	15.2		Processive synthesis on the lagging strand	15	3	7.43	0.0007	25.4
																	Activation of the mRNA upon binding of the cap-binding complex and eIFs, and subsequent binding to 43S	58	2	4.57	0.014	13.2		RHO GTPase Effectors	262	7	5.7	0.00029	7.15		RET signaling	40	3	5.88	0.0028	14.8		Signaling by NOTCH1 HD Domain Mutants in Cancer	15	3	7.43	0.0007	25.4
																	Iron uptake and transport	58	2	4.57	0.014	13.2		Clathrin-mediated endocytosis	145	5	5.68	0.00079	9.08		RHOU GTPase cycle	40	3	5.88	0.0028	14.8		TFAP2 (AP-2) family regulates transcription of growth factors and their receptors	15	3	7.43	0.0007	25.4
																	Meiosis	58	2	4.57	0.014	13.2		Nervous system development	576	11	5.65	7.8e-05	5.31		Metabolism of cofactors	19	2	5.82	0.0078	21.2		APC-Cdc20 mediated degradation of Nek2A	26	4	7.41	0.00023	18.6
																	Neurotransmitter receptors and postsynaptic signal transmission	204	4	4.56	0.0042	7.67		Downstream signaling of activated FGFR4	27	2	5.63	0.0082	19.6		Transcription of E2F targets under negative control by DREAM complex	19	2	5.82	0.0078	21.2		Downregulation of TGF-beta receptor signaling	26	4	7.41	0.00023	18.6
																	Vesicle-mediated transport	671	8	4.55	0.0013	4.96		Infection with Mycobacterium tuberculosis	27	2	5.63	0.0082	19.6		Translesion Synthesis by POLH	19	2	5.82	0.0078	21.2		Purinergic signaling in leishmaniasis infection	26	4	7.41	0.00023	18.6
																	SARS-CoV-2 activates/modulates innate and adaptive immune responses	123	3	4.54	0.0069	9.41		Integrin signaling	27	2	5.63	0.0082	19.6		Clathrin-mediated endocytosis	145	6	5.79	0.0004	8.09		RET signaling	40	5	7.35	9.9e-05	14.7
																	Degradation of GLI1 by the proteasome	60	2	4.48	0.015	12.7		Cellular response to heat stress	99	4	5.6	0.0016	10.6		Cargo recognition for clathrin-mediated endocytosis	105	5	5.78	0.0007	9.29		PKR-mediated signaling	75	7	7.31	2.6e-05	10.7
																	SCF(Skp2)-mediated degradation of p27/p21	60	2	4.48	0.015	12.7		Budding and maturation of HIV virion	28	2	5.52	0.0087	18.8		RUNX1 regulates transcription of genes involved in differentiation of HSCs	70	4	5.78	0.0014	11.2		TCR signaling	119	9	7.26	8.9e-06	8.58
																	Defective CFTR causes cystic fibrosis	61	2	4.43	0.015	12.5		B-WICH complex positively regulates rRNA expression	28	2	5.52	0.0087	18.8		Signaling by VEGF	106	5	5.74	0.00072	9.2		G0 and Early G1	27	4	7.25	0.00027	17.8
																	Transcriptional Regulation by MECP2	61	2	4.43	0.015	12.5		Notch-HLH transcription pathway	28	2	5.52	0.0087	18.8		ISG15 antiviral mechanism	72	4	5.68	0.0015	10.8		Regulated Necrosis	58	6	7.2	5.5e-05	11.9
																	Signaling by ROBO receptors	216	4	4.39	0.0049	7.23		Degradation of GLI1 by the proteasome	60	3	5.51	0.0036	13		Autophagy	150	6	5.66	0.00047	7.81		Assembly Of The HIV Virion	16	3	7.17	0.00085	23.4
																	Dectin-1 mediated noncanonical NF-kB signaling	62	2	4.39	0.016	12.3		Post-translational protein modification	1348	18	5.44	2.8e-05	3.99		ER Quality Control Compartment (ERQC)	20	2	5.65	0.0084	20.1		Rap1 signalling	16	3	7.17	0.00085	23.4
																	Peroxisomal protein import	62	2	4.39	0.016	12.3		FOXO-mediated transcription of oxidative stress, metabolic and neuronal genes	29	2	5.41	0.0092	18.1		FRS-mediated FGFR3 signaling	20	2	5.65	0.0084	20.1		Notch-HLH transcription pathway	28	4	7.11	0.0003	17
																	RAB geranylgeranylation	62	2	4.39	0.016	12.3		G1/S-Specific Transcription	29	2	5.41	0.0092	18.1		PI-3K cascade:FGFR4	20	2	5.65	0.0084	20.1		CLEC7A (Dectin-1) signaling	100	8	7.09	1.9e-05	9.07
																	Host Interactions of HIV factors	130	3	4.38	0.0078	8.89		TRAF6 mediated IRF7 activation	29	2	5.41	0.0092	18.1		SHC-mediated cascade:FGFR4	20	2	5.65	0.0084	20.1		Interferon Signaling	267	14	7.07	1.5e-06	5.94
																	Protein ubiquitination	63	2	4.35	0.016	12.1		Translation of SARS-CoV-1 Structural Proteins	29	2	5.41	0.0092	18.1		Signalling to RAS	20	2	5.65	0.0084	20.1		SCF(Skp2)-mediated degradation of p27/p21	60	6	7.05	6.5e-05	11.5
																	Asymmetric localization of PCP proteins	64	2	4.31	0.016	11.9		Cargo recognition for clathrin-mediated endocytosis	105	4	5.4	0.002	9.94		TP53 Regulates Transcription of Genes Involved in Cytochrome C Release	20	2	5.65	0.0084	20.1		Signaling by FGFR2 in disease	43	5	7.05	0.00014	13.5
																	Hedgehog ligand biogenesis	65	2	4.27	0.017	11.7		Activation of anterior HOX genes in hindbrain development during early embryogenesis	62	3	5.4	0.0039	12.6		Regulation of RUNX2 expression and activity	73	4	5.64	0.0016	10.7		SUMOylation of transcription cofactors	43	5	7.05	0.00014	13.5
																	Innate Immune System	1047	10	4.26	0.0014	4.08		Dectin-1 mediated noncanonical NF-kB signaling	62	3	5.4	0.0039	12.6		Aggrephagy	43	3	5.64	0.0033	13.7		Recruitment of mitotic centrosome proteins and complexes	80	7	7.02	3.7e-05	9.94
																	Mitotic Metaphase and Anaphase	235	4	4.15	0.0061	6.63		Maternal to zygotic transition (MZT)	63	3	5.35	0.004	12.4		Negative regulation of MAPK pathway	43	3	5.64	0.0033	13.7		Transcriptional Regulation by MECP2	61	6	6.98	7.1e-05	11.3
																	Formation of paraxial mesoderm	68	2	4.15	0.018	11.2		Activation of BH3-only proteins	30	2	5.31	0.0097	17.5		PKMTs methylate histone lysines	43	3	5.64	0.0033	13.7		Downstream signaling events of B Cell Receptor (BCR)	81	7	6.97	3.9e-05	9.81
																	Late SARS-CoV-2 Infection Events	68	2	4.15	0.018	11.2		Downstream signaling of activated FGFR2	30	2	5.31	0.0097	17.5		Cell death signalling via NRAGE, NRIF and NADE	74	4	5.59	0.0016	10.5		Selective autophagy	81	7	6.97	3.9e-05	9.81
																	Regulation of RAS by GAPs	68	2	4.15	0.018	11.2		Recognition of DNA damage by PCNA-containing replication complex	30	2	5.31	0.0097	17.5		Influenza Infection	154	6	5.56	0.00054	7.6		Regulation of RUNX1 Expression and Activity	17	3	6.93	0.001	21.8
																	Hemostasis	608	7	4.13	0.0028	4.68		Synthesis of active ubiquitin: roles of E1 and E2 enzymes	30	2	5.31	0.0097	17.5		Interleukin-2 family signaling	44	3	5.56	0.0035	13.3		Signaling by Activin	17	3	6.93	0.001	21.8
																	Regulation of PTEN stability and activity	69	2	4.12	0.019	11		Transcriptional regulation of pluripotent stem cells	30	2	5.31	0.0097	17.5		RNA Polymerase I Transcription Initiation	44	3	5.56	0.0035	13.3		Membrane Trafficking	624	23	6.92	2.3e-07	4.27
																	M Phase	353	5	4.08	0.0047	5.59		SARS-CoV-2 Infection	291	7	5.3	0.00051	6.41		TBC/RABGAPs	44	3	5.56	0.0035	13.3		Signaling by Insulin receptor	82	7	6.91	4.2e-05	9.68
																	Beta-catenin independent WNT signaling	146	3	4.07	0.01	7.89		Activated NOTCH1 Transmits Signal to the Nucleus	31	2	5.21	0.01	16.9		Plasma lipoprotein assembly, remodeling, and clearance	75	4	5.54	0.0017	10.4		Vesicle-mediated transport	671	24	6.9	2.1e-07	4.16
																	Orc1 removal from chromatin	71	2	4.05	0.02	10.7		Diseases of Immune System	31	2	5.21	0.01	16.9		Chromatin modifying enzymes	204	7	5.52	0.00037	6.72		Potential therapeutics for SARS	106	8	6.83	2.8e-05	8.51
																	Neddylation	244	4	4.04	0.0067	6.38		Downstream signaling of activated FGFR1	31	2	5.21	0.01	16.9		CTLA4 inhibitory signaling	21	2	5.5	0.009	19		Adaptive Immune System	773	26	6.81	1.9e-07	3.93
																	HIV Life Cycle	148	3	4.03	0.011	7.78		Endosomal Sorting Complex Required For Transport (ESCRT)	31	2	5.21	0.01	16.9		PCNA-Dependent Long Patch Base Excision Repair	21	2	5.5	0.009	19		Degradation of beta-catenin by the destruction complex	84	7	6.81	4.8e-05	9.43
																	Autophagy	150	3	4	0.011	7.67		RHO GTPases activate IQGAPs	31	2	5.21	0.01	16.9		PI-3K cascade:FGFR1	21	2	5.5	0.009	19		Signaling by BRAF and RAF1 fusions	64	6	6.78	9e-05	10.7
																	Cell-Cell communication	150	3	4	0.011	7.67		HDACs deacetylate histones	32	2	5.12	0.011	16.3		Regulation of FZD by ubiquitination	21	2	5.5	0.009	19		Negative epigenetic regulation of rRNA expression	46	5	6.77	0.00018	12.5
																	Regulation of RUNX2 expression and activity	73	2	3.98	0.021	10.4		RIPK1-mediated regulated necrosis	32	2	5.12	0.011	16.3		SHC-mediated cascade:FGFR1	21	2	5.5	0.009	19		MECP2 regulates neuronal receptors and channels	18	3	6.72	0.0012	20.3
																	APC/C:Cdh1 mediated degradation of Cdc20 and other APC/C:Cdh1 targeted proteins in late mitosis/early G1	74	2	3.95	0.021	10.3		Termination of translesion DNA synthesis	32	2	5.12	0.011	16.3		TP53 regulates transcription of additional cell cycle genes whose exact role in the p53 pathway remain uncertain	21	2	5.5	0.009	19		RORA activates gene expression	18	3	6.72	0.0012	20.3
																	Cellular response to starvation	154	3	3.93	0.012	7.47		CD28 co-stimulation	33	2	5.03	0.011	15.8		ZBP1(DAI) mediated induction of type I IFNs	21	2	5.5	0.009	19		SHC-mediated cascade:FGFR3	18	3	6.72	0.0012	20.3
																	Extra-nuclear estrogen signaling	75	2	3.91	0.021	10.1		Diseases of carbohydrate metabolism	33	2	5.03	0.011	15.8		Interferon alpha/beta signaling	77	4	5.45	0.0019	10.1		TP53 Regulates Transcription of Genes Involved in G2 Cell Cycle Arrest	18	3	6.72	0.0012	20.3
																	PKR-mediated signaling	75	2	3.91	0.021	10.1		TNFR1-induced NF-kappa-B signaling pathway	33	2	5.03	0.011	15.8		RHO GTPase Effectors	262	8	5.44	0.00029	6		Regulation of MECP2 expression and activity	31	4	6.7	0.00044	15.1
																	Plasma lipoprotein assembly, remodeling, and clearance	75	2	3.91	0.021	10.1		Rab regulation of trafficking	120	4	4.97	0.003	8.65		S Phase	163	6	5.36	0.0007	7.16		Signaling by Rho GTPases, Miro GTPases and RHOBTB3	649	23	6.69	4.4e-07	4.1
																	Protein localization	157	3	3.88	0.012	7.32		Late endosomal microautophagy	34	2	4.94	0.012	15.3		Signaling by the B Cell Receptor (BCR)	118	5	5.36	0.0011	8.22		TGF-beta receptor signaling activates SMADs	47	5	6.68	0.0002	12.2
																	Organelle biogenesis and maintenance	263	4	3.83	0.0084	5.9		Negative regulators of DDX58/IFIH1 signaling	34	2	4.94	0.012	15.3		FRS-mediated FGFR4 signaling	22	2	5.36	0.0098	18.1		FCERI mediated NF-kB activation	87	7	6.66	5.9e-05	9.07
																	ABC transporter disorders	78	2	3.82	0.023	9.71		N-glycan trimming in the ER and Calnexin/Calreticulin cycle	34	2	4.94	0.012	15.3		NOTCH2 Activation and Transmission of Signal to the Nucleus	22	2	5.36	0.0098	18.1		Regulation of mRNA stability by proteins that bind AU-rich elements	87	7	6.66	5.9e-05	9.07
																	Transmission across Chemical Synapses	268	4	3.78	0.0088	5.79		RHO GTPases activate PKNs	34	2	4.94	0.012	15.3		PINK1-PRKN Mediated Mitophagy	22	2	5.36	0.0098	18.1		DNA Damage Bypass	48	5	6.6	0.00022	11.9
																	RNA Polymerase II Pre-transcription Events	80	2	3.76	0.024	9.46		Signalling to ERKs	34	2	4.94	0.012	15.3		RAS processing	22	2	5.36	0.0098	18.1		RNA Polymerase I Transcription	48	5	6.6	0.00022	11.9
																	Regulation of expression of SLITs and ROBOs	170	3	3.68	0.015	6.74		Transcriptional Regulation by E2F6	34	2	4.94	0.012	15.3		Heme signaling	47	3	5.35	0.0041	12.4		Nuclear signaling by ERBB4	32	4	6.58	0.0005	14.6
																	TP53 Regulates Metabolic Genes	84	2	3.65	0.026	9		Regulation of RUNX2 expression and activity	73	3	4.9	0.0057	10.6		TCR signaling	119	5	5.33	0.0012	8.14		RIPK1-mediated regulated necrosis	32	4	6.58	0.0005	14.6
																	Transcriptional regulation of white adipocyte differentiation	84	2	3.65	0.026	9		HCMV Early Events	74	3	4.86	0.0059	10.5		Downstream signaling events of B Cell Receptor (BCR)	81	4	5.28	0.0022	9.56		Parasite infection	68	6	6.53	0.00012	9.98
																	Cyclin A:Cdk2-associated events at S phase entry	85	2	3.62	0.027	8.89		SARS-CoV-1 modulates host translation machinery	35	2	4.86	0.012	14.8		RNA Polymerase I Transcription	48	3	5.28	0.0043	12.2		Pre-NOTCH Expression and Processing	49	5	6.52	0.00024	11.7
																	UCH proteinases	85	2	3.62	0.027	8.89		Cellular response to hypoxia	75	3	4.82	0.006	10.3		Adaptive Immune System	773	15	5.25	8.2e-05	3.98		TP53 Regulates Transcription of Cell Cycle Genes	49	5	6.52	0.00024	11.7
																	Hedgehog 'on' state	86	2	3.59	0.027	8.78		Plasma lipoprotein assembly, remodeling, and clearance	75	3	4.82	0.006	10.3		Signaling by NOTCH4	82	4	5.24	0.0023	9.44		MAPK6/MAPK4 signaling	90	7	6.51	7.2e-05	8.74
																	Cell-cell junction organization	87	2	3.57	0.028	8.68		Innate Immune System	1047	14	4.76	0.00025	3.78		FRS-mediated FGFR1 signaling	23	2	5.22	0.01	17.2		Signaling by FLT3 fusion proteins	19	3	6.51	0.0014	19
																	Peptide hormone metabolism	88	2	3.54	0.028	8.58		Association of TriC/CCT with target proteins during biosynthesis	37	2	4.71	0.014	14		Interleukin-7 signaling	23	2	5.22	0.01	17.2		CD28 co-stimulation	33	4	6.46	0.00056	14.1
																	PCP/CE pathway	92	2	3.44	0.03	8.19		Ca-dependent events	37	2	4.71	0.014	14		Long-term potentiation	23	2	5.22	0.01	17.2		Signaling by NOTCH2	33	4	6.46	0.00056	14.1
																	Switching of origins to a post-replicative state	92	2	3.44	0.03	8.19		Plasma lipoprotein clearance	37	2	4.71	0.014	14		PI-3K cascade:FGFR2	23	2	5.22	0.01	17.2		Transcriptional Regulation by NPAS4	33	4	6.46	0.00056	14.1
																	Cilium Assembly	189	3	3.41	0.019	6.05		Membrane Trafficking	624	10	4.67	0.0006	4.36		RHOBTB2 GTPase cycle	23	2	5.22	0.01	17.2		Recruitment of NuMA to mitotic centrosomes	93	7	6.38	8.7e-05	8.44
																	Separation of Sister Chromatids	190	3	3.4	0.019	6.02		Regulation of HSF1-mediated heat shock response	80	3	4.63	0.007	9.64		Innate Immune System	1047	18	5.18	6.3e-05	3.59		Signaling by the B Cell Receptor (BCR)	118	8	6.37	5.5e-05	7.58
																	Reproduction	95	2	3.37	0.032	7.93		Apoptotic cleavage of cellular proteins	38	2	4.63	0.014	13.6		Global Genome Nucleotide Excision Repair (GG-NER)	84	4	5.16	0.0025	9.2		Transcriptional Regulation by E2F6	34	4	6.35	0.00061	13.6
																	rRNA processing	198	3	3.3	0.021	5.77		DNA Damage Recognition in GG-NER	38	2	4.63	0.014	13.6		TP53 Regulates Metabolic Genes	84	4	5.16	0.0025	9.2		ER Quality Control Compartment (ERQC)	20	3	6.33	0.0015	17.9
																	Cellular response to heat stress	99	2	3.28	0.034	7.6		FCERI mediated MAPK activation	38	2	4.63	0.014	13.6		Transcriptional regulation of white adipocyte differentiation	84	4	5.16	0.0025	9.2		Inhibition of DNA recombination at telomere	20	3	6.33	0.0015	17.9
																	Mitotic Prometaphase	201	3	3.27	0.021	5.68		Signaling by NTRKs	134	4	4.62	0.0041	7.71		Estrogen-dependent nuclear events downstream of ESR-membrane signaling	24	2	5.1	0.011	16.4		Interleukin-37 signaling	20	3	6.33	0.0015	17.9
																	DNA Replication Pre-Initiation	100	2	3.26	0.035	7.52		Signaling by NOTCH4	82	3	4.56	0.0073	9.4		Growth hormone receptor signaling	24	2	5.1	0.011	16.4		Lagging Strand Synthesis	20	3	6.33	0.0015	17.9
																	Stimuli-sensing channels	100	2	3.26	0.035	7.52		Fanconi Anemia Pathway	39	2	4.56	0.015	13.2		Incretin synthesis, secretion, and inactivation	24	2	5.1	0.011	16.4		NOTCH4 Intracellular Domain Regulates Transcription	20	3	6.33	0.0015	17.9
																	TNFR2 non-canonical NF-kB pathway	101	2	3.24	0.035	7.45		Platelet Aggregation (Plug Formation)	39	2	4.56	0.015	13.2		Interleukin-6 family signaling	24	2	5.1	0.011	16.4		SHC-mediated cascade:FGFR4	20	3	6.33	0.0015	17.9
																	ABC-family proteins mediated transport	102	2	3.22	0.036	7.37		Translesion synthesis by Y family DNA polymerases bypasses lesions on DNA template	39	2	4.56	0.015	13.2		Resolution of AP sites via the multiple-nucleotide patch replacement pathway	24	2	5.1	0.011	16.4		Signaling by Hippo	20	3	6.33	0.0015	17.9
																	Antigen processing-Cross presentation	105	2	3.15	0.038	7.16		Neurotransmitter receptors and postsynaptic signal transmission	204	5	4.53	0.003	6.36		APC/C-mediated degradation of cell cycle proteins	88	4	5.01	0.0028	8.76		Signalling to RAS	20	3	6.33	0.0015	17.9
																	Potential therapeutics for SARS	106	2	3.13	0.038	7.09		RHOU GTPase cycle	40	2	4.5	0.015	12.9		Calnexin/calreticulin cycle	25	2	4.98	0.012	15.7		TP53 Regulates Transcription of Genes Involved in Cytochrome C Release	20	3	6.33	0.0015	17.9
																	Signaling by VEGF	106	2	3.13	0.038	7.09		Transcriptional regulation of white adipocyte differentiation	84	3	4.49	0.0077	9.17		Cyclin A/B1/B2 associated events during G2/M transition	25	2	4.98	0.012	15.7		ISG15 antiviral mechanism	72	6	6.3	0.00017	9.38
																	Hedgehog 'off' state	113	2	3	0.043	6.64		Cyclin A:Cdk2-associated events at S phase entry	85	3	4.46	0.0079	9.05		Downstream signaling of activated FGFR3	25	2	4.98	0.012	15.7		Anchoring of the basal body to the plasma membrane	95	7	6.29	9.8e-05	8.24
																	Cell junction organization	114	2	2.98	0.043	6.58		DAG and IP3 signaling	41	2	4.43	0.016	12.5		FRS-mediated FGFR2 signaling	25	2	4.98	0.012	15.7		Amyloid fiber formation	52	5	6.29	0.00031	10.9
																	HIV Infection	230	3	2.95	0.029	4.94		Dual Incision in GG-NER	41	2	4.43	0.016	12.5		Glycogen metabolism	25	2	4.98	0.012	15.7		HIV Life Cycle	148	9	6.28	4.2e-05	6.78
																	Regulation of lipid metabolism by PPARalpha	117	2	2.93	0.045	6.4		MET promotes cell motility	41	2	4.43	0.016	12.5		NOTCH3 Intracellular Domain Regulates Transcription	25	2	4.98	0.012	15.7		Synthesis of DNA	121	8	6.26	6.4e-05	7.37
																	L1CAM interactions	120	2	2.88	0.047	6.24		Vesicle-mediated transport	671	10	4.39	0.001	4.04		Signaling by NTRK2 (TRKB)	25	2	4.98	0.012	15.7		Regulation of RUNX2 expression and activity	73	6	6.25	0.00018	9.24
																	Synthesis of DNA	121	2	2.86	0.048	6.19		Regulation of mRNA stability by proteins that bind AU-rich elements	87	3	4.39	0.0083	8.84		Negative regulation of NOTCH4 signaling	54	3	4.92	0.0058	10.7		Autophagy	150	9	6.22	4.6e-05	6.68
																	Neuronal System	405	4	2.72	0.029	3.78		Beta-catenin independent WNT signaling	146	4	4.37	0.0054	7.05		APC-Cdc20 mediated degradation of Nek2A	26	2	4.87	0.013	15		Cell-Cell communication	150	9	6.22	4.6e-05	6.68
																	Adaptive Immune System	773	6	2.67	0.023	3.04		APC/C-mediated degradation of cell cycle proteins	88	3	4.36	0.0086	8.73		Constitutive Signaling by AKT1 E17K in Cancer	26	2	4.87	0.013	15		Cell death signalling via NRAGE, NRIF and NADE	74	6	6.19	0.00019	9.1
																	Translation	272	3	2.58	0.043	4.16		Signaling by ROBO receptors	216	5	4.35	0.0037	6		Downregulation of TGF-beta receptor signaling	26	2	4.87	0.013	15		CTLA4 inhibitory signaling	21	3	6.15	0.0018	16.9
																	Signaling by Rho GTPases, Miro GTPases and RHOBTB3	649	5	2.4	0.037	2.97		HIV Life Cycle	148	4	4.33	0.0056	6.95		Interleukin-20 family signaling	26	2	4.87	0.013	15		Regulation of FZD by ubiquitination	21	3	6.15	0.0018	16.9
																								Aggrephagy	43	2	4.31	0.017	11.9		Pyroptosis	26	2	4.87	0.013	15		SHC-mediated cascade:FGFR1	21	3	6.15	0.0018	16.9
																								E3 ubiquitin ligases ubiquitinate target proteins	43	2	4.31	0.017	11.9		Activation of NMDA receptors and postsynaptic events	93	4	4.84	0.0034	8.26		Signaling by NODAL	21	3	6.15	0.0018	16.9
																								Formation of Incision Complex in GG-NER	43	2	4.31	0.017	11.9		HSP90 chaperone cycle for steroid hormone receptors (SHR) in the presence of ligand	56	3	4.81	0.0062	10.3		Cellular response to hypoxia	75	6	6.14	0.0002	8.97
																								Negative regulation of MAPK pathway	43	2	4.31	0.017	11.9		Fcgamma receptor (FCGR) dependent phagocytosis	95	4	4.77	0.0036	8.08		NOD1/2 Signaling Pathway	36	4	6.13	0.00075	12.8
																								Signaling by FGFR2 in disease	43	2	4.31	0.017	11.9		Downstream signaling of activated FGFR4	27	2	4.76	0.014	14.4		SCF-beta-TrCP mediated degradation of Emi1	55	5	6.07	0.00039	10.3
																								Autophagy	150	4	4.29	0.0058	6.86		Hemostasis	608	12	4.75	0.00037	3.94		eNOS activation	10	2	6.07	0.0058	25.2
																								Cell-Cell communication	150	4	4.29	0.0058	6.86		Budding and maturation of HIV virion	28	2	4.66	0.014	13.9		Interleukin-21 signaling	10	2	6.07	0.0058	25.2
																								TBC/RABGAPs	44	2	4.25	0.018	11.6		B-WICH complex positively regulates rRNA expression	28	2	4.66	0.014	13.9		PI3K events in ERBB4 signaling	10	2	6.07	0.0058	25.2
																								TP53 Regulates Transcription of Cell Death Genes	44	2	4.25	0.018	11.6		Notch-HLH transcription pathway	28	2	4.66	0.014	13.9		RUNX1 and FOXP3 control the development of regulatory T lymphocytes (Tregs)	10	2	6.07	0.0058	25.2
																								Eukaryotic Translation Elongation	92	3	4.24	0.0095	8.34		Uptake and actions of bacterial toxins	28	2	4.66	0.014	13.9		Signal attenuation	10	2	6.07	0.0058	25.2
																								Influenza Infection	154	4	4.21	0.0062	6.67		Beta-catenin independent WNT signaling	146	5	4.65	0.0026	6.57		STAT5 activation downstream of FLT3 ITD mutants	10	2	6.07	0.0058	25.2
																								GPER1 signaling	45	2	4.19	0.019	11.4		HIV Life Cycle	148	5	4.61	0.0028	6.48		Tetrahydrobiopterin (BH4) synthesis, recycling, salvage and regulation	10	2	6.07	0.0058	25.2
																								Apoptotic execution phase	46	2	4.14	0.019	11.1		Degradation of GLI1 by the proteasome	60	3	4.61	0.0073	9.59		Interferon alpha/beta signaling	77	6	6.04	0.00023	8.71
																								Hemostasis	608	9	4.13	0.0019	3.96		SCF(Skp2)-mediated degradation of p27/p21	60	3	4.61	0.0073	9.59		DNA Replication	128	8	6.03	9.2e-05	6.94
																								FCGR3A-mediated IL10 synthesis	47	2	4.08	0.02	10.9		Organelle biogenesis and maintenance	263	7	4.59	0.0015	5.15		Plasma lipoprotein clearance	37	4	6.03	0.00083	12.4
																								Heme signaling	47	2	4.08	0.02	10.9		FOXO-mediated transcription of oxidative stress, metabolic and neuronal genes	29	2	4.57	0.015	13.4		NOTCH2 Activation and Transmission of Signal to the Nucleus	22	3	5.99	0.002	16
																								TGF-beta receptor signaling activates SMADs	47	2	4.08	0.02	10.9		G1/S-Specific Transcription	29	2	4.57	0.015	13.4		Platelet activation, signaling and aggregation	258	12	5.98	2.8e-05	5.17
																								HCMV Infection	98	3	4.07	0.011	7.81		TRAF6 mediated IRF7 activation	29	2	4.57	0.015	13.4		Formation of RNA Pol II elongation complex	57	5	5.94	0.00046	9.87
																								S Phase	163	4	4.05	0.0072	6.29		Translation of SARS-CoV-1 Structural Proteins	29	2	4.57	0.015	13.4		DNA Damage Recognition in GG-NER	38	4	5.94	0.00092	12
																								DNA Damage Bypass	48	2	4.03	0.021	10.6		Activation of anterior HOX genes in hindbrain development during early embryogenesis	62	3	4.52	0.0079	9.27		Cargo recognition for clathrin-mediated endocytosis	105	7	5.89	0.00018	7.4
																								IRS-mediated signalling	48	2	4.03	0.021	10.6		Dectin-1 mediated noncanonical NF-kB signaling	62	3	4.52	0.0079	9.27		Oncogenic MAPK signaling	80	6	5.89	0.00028	8.36
																								Response of EIF2AK4 (GCN2) to amino acid deficiency	100	3	4.01	0.011	7.65		RAB geranylgeranylation	62	3	4.52	0.0079	9.27		Regulation of HSF1-mediated heat shock response	80	6	5.89	0.00028	8.36
																								SARS-CoV-2 modulates host translation machinery	49	2	3.98	0.021	10.4		Signaling by Rho GTPases, Miro GTPases and RHOBTB3	649	12	4.48	0.00062	3.68		Transcriptional Regulation by VENTX	39	4	5.85	0.001	11.7
																								Adaptive Immune System	773	10	3.86	0.0026	3.47		Downstream signaling of activated FGFR2	30	2	4.48	0.016	12.9		RAF-independent MAPK1/3 activation	23	3	5.84	0.0023	15.2
																								Potential therapeutics for SARS	106	3	3.86	0.013	7.2		Recognition of DNA damage by PCNA-containing replication complex	30	2	4.48	0.016	12.9		RHOBTB2 GTPase cycle	23	3	5.84	0.0023	15.2
																								Signaling by VEGF	106	3	3.86	0.013	7.2		SUMOylation of intracellular receptors	30	2	4.48	0.016	12.9		Telomere Extension By Telomerase	23	3	5.84	0.0023	15.2
																								Selenoamino acid metabolism	107	3	3.84	0.013	7.13		Synthesis of active ubiquitin: roles of E1 and E2 enzymes	30	2	4.48	0.016	12.9		Apoptotic cleavage of cell adhesion proteins	11	2	5.76	0.0069	22.4
																								Nuclear Receptor transcription pathway	53	2	3.79	0.025	9.58		Maternal to zygotic transition (MZT)	63	3	4.47	0.0082	9.11		Formation of the anterior neural plate	11	2	5.76	0.0069	22.4
																								M Phase	353	6	3.77	0.0057	4.41		Semaphorin interactions	64	3	4.43	0.0084	8.96		Interleukin-27 signaling	11	2	5.76	0.0069	22.4
																								Organelle biogenesis and maintenance	263	5	3.76	0.0072	4.89		Activated NOTCH1 Transmits Signal to the Nucleus	31	2	4.39	0.017	12.4		MET activates RAS signaling	11	2	5.76	0.0069	22.4
																								G-protein mediated events	54	2	3.75	0.025	9.39		Diseases of Immune System	31	2	4.39	0.017	12.4		Regulation of gene expression by Hypoxia-inducible Factor	11	2	5.76	0.0069	22.4
																								Insulin receptor signalling cascade	54	2	3.75	0.025	9.39		Downstream signaling of activated FGFR1	31	2	4.39	0.017	12.4		Signaling by Leptin	11	2	5.76	0.0069	22.4
																								Negative regulation of NOTCH4 signaling	54	2	3.75	0.025	9.39		Endosomal Sorting Complex Required For Transport (ESCRT)	31	2	4.39	0.017	12.4		Degradation of GLI1 by the proteasome	60	5	5.75	0.00058	9.32
																								Signaling by ALK in cancer	54	2	3.75	0.025	9.39		RHO GTPases activate IQGAPs	31	2	4.39	0.017	12.4		TP53 Regulates Metabolic Genes	84	6	5.7	0.00035	7.93
																								Signaling by Type 1 Insulin-like Growth Factor 1 Receptor (IGF1R)	54	2	3.75	0.025	9.39		HDACs deacetylate histones	32	2	4.31	0.018	12		Transcriptional regulation of white adipocyte differentiation	84	6	5.7	0.00035	7.93
																								SRP-dependent cotranslational protein targeting to membrane	111	3	3.74	0.015	6.86		Termination of translesion DNA synthesis	32	2	4.31	0.018	12		Growth hormone receptor signaling	24	3	5.69	0.0026	14.5
																								Transmission across Chemical Synapses	268	5	3.7	0.0077	4.8		Diseases of carbohydrate metabolism	33	2	4.23	0.019	11.6		Incretin synthesis, secretion, and inactivation	24	3	5.69	0.0026	14.5
																								Hedgehog 'off' state	113	3	3.7	0.015	6.74		RAF activation	33	2	4.23	0.019	11.6		Interleukin-6 family signaling	24	3	5.69	0.0026	14.5
																								AUF1 (hnRNP D0) binds and destabilizes mRNA	55	2	3.7	0.026	9.22		TNFR1-induced NF-kappa-B signaling pathway	33	2	4.23	0.019	11.6		MET promotes cell motility	41	4	5.67	0.0012	11
																								Degradation of AXIN	55	2	3.7	0.026	9.22		Regulation of PTEN stability and activity	69	3	4.22	0.01	8.28		Dectin-1 mediated noncanonical NF-kB signaling	62	5	5.63	0.00066	8.99
																								SCF-beta-TrCP mediated degradation of Emi1	55	2	3.7	0.026	9.22		HIV Infection	230	6	4.18	0.0034	5		EPHB-mediated forward signaling	42	4	5.59	0.0013	10.7
																								Nonsense-Mediated Decay (NMD)	114	3	3.67	0.015	6.68		Costimulation by the CD28 family	70	3	4.18	0.01	8.16		Regulation of beta-cell development	42	4	5.59	0.0013	10.7
																								Adherens junctions interactions	56	2	3.66	0.027	9.05		Late endosomal microautophagy	34	2	4.16	0.02	11.3		Maternal to zygotic transition (MZT)	63	5	5.57	0.0007	8.84
																								SUMOylation of chromatin organization proteins	56	2	3.66	0.027	9.05		Lysosome Vesicle Biogenesis	34	2	4.16	0.02	11.3		NCAM signaling for neurite out-growth	63	5	5.57	0.0007	8.84
																								Cilium Assembly	189	4	3.64	0.011	5.4		Negative regulators of DDX58/IFIH1 signaling	34	2	4.16	0.02	11.3		Calnexin/calreticulin cycle	25	3	5.56	0.0029	13.8
																								Degradation of DVL	57	2	3.62	0.027	8.88		N-glycan trimming in the ER and Calnexin/Calreticulin cycle	34	2	4.16	0.02	11.3		Cyclin A/B1/B2 associated events during G2/M transition	25	3	5.56	0.0029	13.8
																								Formation of RNA Pol II elongation complex	57	2	3.62	0.027	8.88		Orc1 removal from chromatin	71	3	4.14	0.011	8.03		Glycogen metabolism	25	3	5.56	0.0029	13.8
																								Interleukin-12 family signaling	57	2	3.62	0.027	8.88		Translocation of SLC2A4 (GLUT4) to the plasma membrane	71	3	4.14	0.011	8.03		NOTCH3 Intracellular Domain Regulates Transcription	25	3	5.56	0.0029	13.8
																								TNF signaling	57	2	3.62	0.027	8.88		RHOBTB GTPase Cycle	35	2	4.08	0.021	10.9		Signaling by Erythropoietin	25	3	5.56	0.0029	13.8
																								Translation of SARS-CoV-2 Structural Proteins	57	2	3.62	0.027	8.88		SARS-CoV-1 modulates host translation machinery	35	2	4.08	0.021	10.9		Aggrephagy	43	4	5.51	0.0014	10.5
																								Eukaryotic Translation Initiation	118	3	3.59	0.017	6.44		Synthesis of DNA	121	4	4.05	0.0075	6.28		E3 ubiquitin ligases ubiquitinate target proteins	43	4	5.51	0.0014	10.5
																								Activation of the mRNA upon binding of the cap-binding complex and eIFs, and subsequent binding to 43S	58	2	3.58	0.028	8.72		HCMV Early Events	74	3	4.03	0.012	7.69		PKMTs methylate histone lysines	43	4	5.51	0.0014	10.5
																								Iron uptake and transport	58	2	3.58	0.028	8.72		Cellular response to hypoxia	75	3	3.99	0.012	7.59		Beta-catenin independent WNT signaling	146	8	5.5	0.00021	6.03
																								Synthesis of DNA	121	3	3.53	0.018	6.28		Association of TriC/CCT with target proteins during biosynthesis	37	2	3.95	0.023	10.3		Activation of the TFAP2 (AP-2) family of transcription factors	12	2	5.48	0.0081	20.2
																								SCF(Skp2)-mediated degradation of p27/p21	60	2	3.51	0.03	8.42		Ca-dependent events	37	2	3.95	0.023	10.3		Gap junction degradation	12	2	5.48	0.0081	20.2
																								Mitotic Prometaphase	201	4	3.47	0.013	5.07		DNA Replication	128	4	3.9	0.0088	5.92		GP1b-IX-V activation signalling	12	2	5.48	0.0081	20.2
																								Defective CFTR causes cystic fibrosis	61	2	3.47	0.031	8.28		Apoptotic cleavage of cellular proteins	38	2	3.88	0.024	10		Interleukin-35 Signalling	12	2	5.48	0.0081	20.2
																								Ca2+ pathway	62	2	3.43	0.031	8.14		DNA Damage Recognition in GG-NER	38	2	3.88	0.024	10		IRF3-mediated induction of type I IFN	12	2	5.48	0.0081	20.2
																								Peroxisomal protein import	62	2	3.43	0.031	8.14		FCERI mediated MAPK activation	38	2	3.88	0.024	10		PECAM1 interactions	12	2	5.48	0.0081	20.2
																								RAB geranylgeranylation	62	2	3.43	0.031	8.14		Cilium Assembly	189	5	3.86	0.0068	5.02		TP53 Regulates Transcription of Caspase Activators and Caspases	12	2	5.48	0.0081	20.2
																								NCAM signaling for neurite out-growth	63	2	3.4	0.032	8.01		Cardiac conduction	130	4	3.85	0.0091	5.83		Interleukin-2 family signaling	44	4	5.43	0.0015	10.2
																								Protein ubiquitination	63	2	3.4	0.032	8.01		Host Interactions of HIV factors	130	4	3.85	0.0091	5.83		RNA Polymerase I Transcription Initiation	44	4	5.43	0.0015	10.2
																								DNA Replication	128	3	3.39	0.02	5.92		Regulation of HSF1-mediated heat shock response	80	3	3.83	0.014	7.09		TBC/RABGAPs	44	4	5.43	0.0015	10.2
																								Asymmetric localization of PCP proteins	64	2	3.36	0.033	7.88		Fanconi Anemia Pathway	39	2	3.82	0.025	9.75		Interleukin-20 family signaling	26	3	5.43	0.0032	13.2
																								Cardiac conduction	130	3	3.35	0.021	5.83		Translesion synthesis by Y family DNA polymerases bypasses lesions on DNA template	39	2	3.82	0.025	9.75		Polymerase switching on the C-strand of the telomere	26	3	5.43	0.0032	13.2
																								Host Interactions of HIV factors	130	3	3.35	0.021	5.83		MAP2K and MAPK activation	40	2	3.76	0.026	9.49		Activation of NMDA receptors and postsynaptic events	93	6	5.33	0.00058	7.11
																								Hedgehog ligand biogenesis	65	2	3.33	0.034	7.75		DAG and IP3 signaling	41	2	3.7	0.027	9.25		VEGFR2 mediated vascular permeability	27	3	5.31	0.0035	12.7
																								Formation of paraxial mesoderm	68	2	3.23	0.036	7.4		Dual Incision in GG-NER	41	2	3.7	0.027	9.25		Regulation of RAS by GAPs	68	5	5.3	0.00098	8.14
																								Late SARS-CoV-2 Infection Events	68	2	3.23	0.036	7.4		MET promotes cell motility	41	2	3.7	0.027	9.25		Regulation of PTEN stability and activity	69	5	5.25	0.001	8.01
																								Parasite infection	68	2	3.23	0.036	7.4		MTOR signalling	41	2	3.7	0.027	9.25		Advanced glycosylation endproduct receptor signaling	13	2	5.24	0.0093	18.3
																								Regulation of RAS by GAPs	68	2	3.23	0.036	7.4		Mitotic Prometaphase	201	5	3.68	0.0084	4.71		Condensation of Prophase Chromosomes	13	2	5.24	0.0093	18.3
																								Regulation of PTEN stability and activity	69	2	3.2	0.037	7.29		Regulation of beta-cell development	42	2	3.65	0.028	9.02		p38MAPK events	13	2	5.24	0.0093	18.3
																								Costimulation by the CD28 family	70	2	3.17	0.038	7.18		Neurotransmitter receptors and postsynaptic signal transmission	204	5	3.63	0.0088	4.64		Repression of WNT target genes	13	2	5.24	0.0093	18.3
																								Orc1 removal from chromatin	71	2	3.14	0.039	7.07		M Phase	353	7	3.61	0.0061	3.79		Synthesis, secretion, and inactivation of Glucose-dependent Insulinotropic Polypeptide (GIP)	13	2	5.24	0.0093	18.3
																								HIV Infection	230	4	3.13	0.019	4.41		E3 ubiquitin ligases ubiquitinate target proteins	43	2	3.59	0.029	8.8		Telomere C-strand synthesis initiation	13	2	5.24	0.0093	18.3
																								Mitotic Metaphase and Anaphase	235	4	3.07	0.021	4.31		Formation of Incision Complex in GG-NER	43	2	3.59	0.029	8.8		Heme signaling	47	4	5.21	0.0019	9.49
																								APC/C:Cdh1 mediated degradation of Cdc20 and other APC/C:Cdh1 targeted proteins in late mitosis/early G1	74	2	3.05	0.042	6.78		Signaling by FGFR2 in disease	43	2	3.59	0.029	8.8		Costimulation by the CD28 family	70	5	5.2	0.0011	7.88
																								G alpha (s) signalling events	149	3	3.03	0.028	5.07		SUMOylation of transcription cofactors	43	2	3.59	0.029	8.8		Budding and maturation of HIV virion	28	3	5.2	0.0039	12.2
																								Signaling by Hedgehog	150	3	3.02	0.029	5.03		Signaling by moderate kinase activity BRAF mutants	44	2	3.54	0.03	8.59		B-WICH complex positively regulates rRNA expression	28	3	5.2	0.0039	12.2
																								Extra-nuclear estrogen signaling	75	2	3.02	0.043	6.68		TP53 Regulates Transcription of Cell Death Genes	44	2	3.54	0.03	8.59		HIV Infection	230	10	5.17	0.00021	4.76
																								Neddylation	244	4	2.98	0.023	4.15		GPER1 signaling	45	2	3.49	0.031	8.39		M Phase	353	13	5.16	0.00011	4.06
																								Cellular response to starvation	154	3	2.96	0.03	4.9		Signaling by ROBO receptors	216	5	3.47	0.011	4.38		Orc1 removal from chromatin	71	5	5.16	0.0012	7.77
																								ABC transporter disorders	78	2	2.94	0.046	6.42		Cell-Cell communication	150	4	3.47	0.014	5.02		Translocation of SLC2A4 (GLUT4) to the plasma membrane	71	5	5.16	0.0012	7.77
																								Protein localization	157	3	2.91	0.032	4.8		Chromosome Maintenance	92	3	3.47	0.019	6.13		DAP12 signaling	29	3	5.09	0.0043	11.7
																								RNA Polymerase II Pre-transcription Events	80	2	2.89	0.048	6.25		Eukaryotic Translation Elongation	92	3	3.47	0.019	6.13		EGR2 and SOX10-mediated initiation of Schwann cell myelination	29	3	5.09	0.0043	11.7
																								Regulation of expression of SLITs and ROBOs	170	3	2.73	0.038	4.42		PCP/CE pathway	92	3	3.47	0.019	6.13		TRAF6 mediated IRF7 activation	29	3	5.09	0.0043	11.7
																								Signaling by Rho GTPases, Miro GTPases and RHOBTB3	649	7	2.66	0.022	2.77		Switching of origins to a post-replicative state	92	3	3.47	0.019	6.13		Translation of SARS-CoV-1 Structural Proteins	29	3	5.09	0.0043	11.7
																								Neuronal System	405	5	2.58	0.031	3.13		Apoptotic execution phase	46	2	3.44	0.033	8.2		APC/C:Cdh1 mediated degradation of Cdc20 and other APC/C:Cdh1 targeted proteins in late mitosis/early G1	74	5	5.02	0.0014	7.43
																								Signaling by GPCR	683	7	2.51	0.027	2.63		FCGR3A-mediated IL10 synthesis	47	2	3.39	0.034	8.02		AKT phosphorylates targets in the cytosol	14	2	5.02	0.01	16.8
																								Separation of Sister Chromatids	190	3	2.49	0.049	3.95		TGF-beta receptor signaling activates SMADs	47	2	3.39	0.034	8.02		DCC mediated attractive signaling	14	2	5.02	0.01	16.8
																								G alpha (i) signalling events	310	4	2.4	0.045	3.24		DNA Damage Bypass	48	2	3.35	0.035	7.84		Erythropoietin activates RAS	14	2	5.02	0.01	16.8
																															IRS-mediated signalling	48	2	3.35	0.035	7.84		Interleukin-15 signaling	14	2	5.02	0.01	16.8
																															Recycling pathway of L1	48	2	3.35	0.035	7.84		Metabolism of nitric oxide: NOS3 activation and regulation	14	2	5.02	0.01	16.8
																															HCMV Infection	98	3	3.32	0.022	5.74		Prolonged ERK activation events	14	2	5.02	0.01	16.8
																															Gap junction trafficking and regulation	49	2	3.3	0.036	7.67		PTK6 Regulates RHO GTPases, RAS GTPase and MAP kinases	14	2	5.02	0.01	16.8
																															SARS-CoV-2 modulates host translation machinery	49	2	3.3	0.036	7.67		Regulation of IFNG signaling	14	2	5.02	0.01	16.8
																															DNA Replication Pre-Initiation	100	3	3.27	0.023	5.62		Regulation of TP53 Activity through Association with Co-factors	14	2	5.02	0.01	16.8
																															Response of EIF2AK4 (GCN2) to amino acid deficiency	100	3	3.27	0.023	5.62		RUNX3 regulates NOTCH signaling	14	2	5.02	0.01	16.8
																															EPH-ephrin mediated repulsion of cells	51	2	3.22	0.039	7.36		STING mediated induction of host immune responses	14	2	5.02	0.01	16.8
																															Extension of Telomeres	51	2	3.22	0.039	7.36		TP53 Regulates Transcription of Genes Involved in G1 Cell Cycle Arrest	14	2	5.02	0.01	16.8
																															Neddylation	244	5	3.13	0.016	3.86		TRAF3-dependent IRF activation pathway	14	2	5.02	0.01	16.8
																															Selenoamino acid metabolism	107	3	3.11	0.027	5.24		MET activates PTK2 signaling	30	3	4.98	0.0047	11.3
																															G-protein mediated events	54	2	3.09	0.043	6.93		SUMOylation of intracellular receptors	30	3	4.98	0.0047	11.3
																															Insulin receptor signalling cascade	54	2	3.09	0.043	6.93		Synthesis of active ubiquitin: roles of E1 and E2 enzymes	30	3	4.98	0.0047	11.3
																															Signaling by Type 1 Insulin-like Growth Factor 1 Receptor (IGF1R)	54	2	3.09	0.043	6.93		Plasma lipoprotein assembly, remodeling, and clearance	75	5	4.97	0.0015	7.32
																															Transcriptional activation of mitochondrial biogenesis	54	2	3.09	0.043	6.93		Neddylation	244	10	4.93	0.00031	4.48
																															AUF1 (hnRNP D0) binds and destabilizes mRNA	55	2	3.06	0.044	6.8		Activated NOTCH1 Transmits Signal to the Nucleus	31	3	4.89	0.0051	10.9
																															Degradation of AXIN	55	2	3.06	0.044	6.8		Endosomal Sorting Complex Required For Transport (ESCRT)	31	3	4.89	0.0051	10.9
																															SCF-beta-TrCP mediated degradation of Emi1	55	2	3.06	0.044	6.8		MAPK targets/ Nuclear events mediated by MAP kinases	31	3	4.89	0.0051	10.9
																															SRP-dependent cotranslational protein targeting to membrane	111	3	3.03	0.03	5.05		RHO GTPases activate IQGAPs	31	3	4.89	0.0051	10.9
																															Adherens junctions interactions	56	2	3.02	0.045	6.68		Signaling by BMP	31	3	4.89	0.0051	10.9
																															SUMOylation of chromatin organization proteins	56	2	3.02	0.045	6.68		Prolactin receptor signaling	15	2	4.83	0.012	15.5
																															Hedgehog 'off' state	113	3	2.99	0.031	4.95		Nuclear Receptor transcription pathway	53	4	4.82	0.0029	8.32
																															Degradation of DVL	57	2	2.98	0.046	6.56		DNA strand elongation	32	3	4.79	0.0055	10.5
																															Formation of RNA Pol II elongation complex	57	2	2.98	0.046	6.56		HDACs deacetylate histones	32	3	4.79	0.0055	10.5
																															Interleukin-12 family signaling	57	2	2.98	0.046	6.56		RNA Polymerase II Pre-transcription Events	80	5	4.76	0.0019	6.83
																															TNF signaling	57	2	2.98	0.046	6.56		Signaling by ROBO receptors	216	9	4.74	0.00056	4.53
																															Translation of SARS-CoV-2 Structural Proteins	57	2	2.98	0.046	6.56		Diseases of carbohydrate metabolism	33	3	4.7	0.0058	10.1
																															Nonsense-Mediated Decay (NMD)	114	3	2.97	0.031	4.91		HIV elongation arrest and recovery	33	3	4.7	0.0058	10.1
																															Activation of the mRNA upon binding of the cap-binding complex and eIFs, and subsequent binding to 43S	58	2	2.95	0.047	6.44		Meiotic synapsis	33	3	4.7	0.0058	10.1
																															Iron uptake and transport	58	2	2.95	0.047	6.44		RAF activation	33	3	4.7	0.0058	10.1
																															Regulation of lipid metabolism by PPARalpha	117	3	2.91	0.033	4.78		TNFR1-induced NF-kappa-B signaling pathway	33	3	4.7	0.0058	10.1
																															Eukaryotic Translation Initiation	118	3	2.89	0.034	4.74		Adherens junctions interactions	56	4	4.65	0.0035	7.84
																															Transmission across Chemical Synapses	268	5	2.88	0.022	3.5		FOXO-mediated transcription of cell death genes	16	2	4.65	0.013	14.4
																															L1CAM interactions	120	3	2.85	0.035	4.66		Polo-like kinase mediated events	16	2	4.65	0.013	14.4
																															Muscle contraction	200	4	2.74	0.031	3.73		Regulation of gene expression in late stage (branching morphogenesis) pancreatic bud precursor cells	16	2	4.65	0.013	14.4
																															Mitotic Metaphase and Anaphase	235	4	2.36	0.049	3.16		Regulation of KIT signaling	16	2	4.65	0.013	14.4
																															RHO GTPase cycle	440	6	2.28	0.043	2.55		Sema3A PAK dependent Axon repulsion	16	2	4.65	0.013	14.4
																															Signaling by GPCR	683	8	2.18	0.044	2.2		Transcription of E2F targets under negative control by p107 (RBL1) and p130 (RBL2) in complex with HDAC1	16	2	4.65	0.013	14.4
																																						Organelle biogenesis and maintenance	263	10	4.64	0.00055	4.14
																																						Late endosomal microautophagy	34	3	4.61	0.0063	9.82
																																						Negative regulators of DDX58/IFIH1 signaling	34	3	4.61	0.0063	9.82
																																						N-glycan trimming in the ER and Calnexin/Calreticulin cycle	34	3	4.61	0.0063	9.82
																																						Degradation of DVL	57	4	4.6	0.0037	7.69
																																						UCH proteinases	85	5	4.56	0.0024	6.4
																																						Iron uptake and transport	58	4	4.55	0.0039	7.55
																																						GPVI-mediated activation cascade	35	3	4.53	0.0068	9.51
																																						RHOBTB GTPase Cycle	35	3	4.53	0.0068	9.51
																																						Aberrant regulation of mitotic G1/S transition in cancer due to RB1 defects	17	2	4.48	0.015	13.4
																																						Butyrate Response Factor 1 (BRF1) binds and destabilizes mRNA	17	2	4.48	0.015	13.4
																																						FOXO-mediated transcription of cell cycle genes	17	2	4.48	0.015	13.4
																																						KSRP (KHSRP) binds and destabilizes mRNA	17	2	4.48	0.015	13.4
																																						RIP-mediated NFkB activation via ZBP1	17	2	4.48	0.015	13.4
																																						Influenza Infection	154	7	4.47	0.0014	4.92
																																						Cytoprotection by HMOX1	61	4	4.39	0.0046	7.15
																																						Nuclear Events (kinase and transcription factor activation)	61	4	4.39	0.0046	7.15
																																						RUNX1 interacts with co-factors whose precise effect on RUNX1 targets is not known	37	3	4.37	0.0079	8.95
																																						RAB geranylgeranylation	62	4	4.35	0.0048	7.03
																																						EPH-Ephrin signaling	92	5	4.31	0.0034	5.88
																																						PCP/CE pathway	92	5	4.31	0.0034	5.88
																																						Switching of origins to a post-replicative state	92	5	4.31	0.0034	5.88
																																						Mitotic Prometaphase	201	8	4.3	0.0015	4.3
																																						Protein ubiquitination	63	4	4.3	0.0051	6.91
																																						Apoptotic cleavage of cellular proteins	38	3	4.3	0.0083	8.69
																																						Semaphorin interactions	64	4	4.25	0.0053	6.79
																																						NGF-stimulated transcription	39	3	4.23	0.0089	8.45
																																						Metabolism of cofactors	19	2	4.2	0.018	11.9
																																						NFE2L2 regulating anti-oxidant/detoxification enzymes	19	2	4.2	0.018	11.9
																																						Transcription of E2F targets under negative control by DREAM complex	19	2	4.2	0.018	11.9
																																						VEGFR2 mediated cell proliferation	19	2	4.2	0.018	11.9
																																						Host Interactions of HIV factors	130	6	4.19	0.0029	4.97
																																						RHOU GTPase cycle	40	3	4.16	0.0094	8.22
																																						Formation of paraxial mesoderm	68	4	4.08	0.0064	6.37
																																						Phosphorylation of the APC/C	20	2	4.07	0.02	11.2
																																						Sema4D induced cell migration and growth-cone collapse	20	2	4.07	0.02	11.2
																																						DNA Replication Pre-Initiation	100	5	4.06	0.0047	5.39
																																						RHO GTPases Activate Formins	138	6	4	0.0038	4.67
																																						HIV Transcription Elongation	43	3	3.97	0.011	7.61
																																						Regulation of gene expression in beta cells	21	2	3.95	0.021	10.6
																																						Signal transduction by L1	21	2	3.95	0.021	10.6
																																						TP53 regulates transcription of additional cell cycle genes whose exact role in the p53 pathway remain uncertain	21	2	3.95	0.021	10.6
																																						ZBP1(DAI) mediated induction of type I IFNs	21	2	3.95	0.021	10.6
																																						DAP12 interactions	44	3	3.91	0.012	7.42
																																						TP53 Regulates Transcription of Cell Death Genes	44	3	3.91	0.012	7.42
																																						GPER1 signaling	45	3	3.85	0.013	7.24
																																						HCMV Early Events	74	4	3.84	0.0083	5.82
																																						CD28 dependent PI3K/Akt signaling	22	2	3.84	0.023	10.1
																																						Role of LAT2/NTAL/LAB on calcium mobilization	22	2	3.84	0.023	10.1
																																						Cell surface interactions at the vascular wall	146	6	3.82	0.0049	4.4
																																						Apoptotic execution phase	46	3	3.79	0.013	7.07
																																						Cilium Assembly	189	7	3.78	0.0042	3.96
																																						SUMOylation of DNA damage response and repair proteins	76	4	3.77	0.0091	5.66
																																						Signaling by Hedgehog	150	6	3.74	0.0055	4.28
																																						Interleukin-7 signaling	23	2	3.73	0.025	9.61
																																						Long-term potentiation	23	2	3.73	0.025	9.61
																																						Hedgehog 'off' state	113	5	3.7	0.0073	4.73
																																						Recycling pathway of L1	48	3	3.68	0.015	6.76
																																						HATs acetylate histones	80	4	3.63	0.01	5.36
																																						Gap junction trafficking and regulation	49	3	3.63	0.015	6.61
																																						Netrin-1 signaling	49	3	3.63	0.015	6.61
																																						RHO GTPases Activate NADPH Oxidases	24	2	3.63	0.027	9.17
																																						Sema4D in semaphorin signaling	24	2	3.63	0.027	9.17
																																						Regulation of lipid metabolism by PPARalpha	117	5	3.6	0.0083	4.56
																																						Mitotic Prophase	81	4	3.59	0.011	5.29
																																						PI Metabolism	82	4	3.56	0.011	5.22
																																						Neurotransmitter receptors and postsynaptic signal transmission	204	7	3.54	0.0059	3.66
																																						BMAL1:CLOCK,NPAS2 activates circadian gene expression	25	2	3.54	0.029	8.77
																																						G beta:gamma signalling through PI3Kgamma	25	2	3.54	0.029	8.77
																																						EPH-ephrin mediated repulsion of cells	51	3	3.53	0.017	6.33
																																						L1CAM interactions	120	5	3.52	0.0091	4.44
																																						Antigen processing: Ubiquitination & Proteasome degradation	307	9	3.46	0.0052	3.13
																																						Constitutive Signaling by AKT1 E17K in Cancer	26	2	3.45	0.031	8.41
																																						Pyroptosis	26	2	3.45	0.031	8.41
																																						Regulation of IFNA/IFNB signaling	26	2	3.45	0.031	8.41
																																						Synthesis of PIPs at the plasma membrane	53	3	3.44	0.019	6.08
																																						Hedgehog 'on' state	86	4	3.43	0.013	4.96
																																						Cell-cell junction organization	87	4	3.4	0.014	4.9
																																						Transcriptional activation of mitochondrial biogenesis	54	3	3.39	0.02	5.96
																																						Interleukin receptor SHC signaling	27	2	3.37	0.033	8.07
																																						AUF1 (hnRNP D0) binds and destabilizes mRNA	55	3	3.35	0.02	5.85
																																						Degradation of AXIN	55	3	3.35	0.02	5.85
																																						Cardiac conduction	130	5	3.3	0.012	4.09
																																						HSP90 chaperone cycle for steroid hormone receptors (SHR) in the presence of ligand	56	3	3.3	0.021	5.74
																																						SUMOylation of chromatin organization proteins	56	3	3.3	0.021	5.74
																																						CREB1 phosphorylation through NMDA receptor-mediated activation of RAS signaling	28	2	3.29	0.035	7.76
																																						Uptake and actions of bacterial toxins	28	2	3.29	0.035	7.76
																																						Class I MHC mediated antigen processing & presentation	379	10	3.27	0.0063	2.81
																																						TNF signaling	57	3	3.26	0.022	5.63
																																						Translation of SARS-CoV-2 Structural Proteins	57	3	3.26	0.022	5.63
																																						EPHA-mediated growth cone collapse	29	2	3.21	0.037	7.47
																																						G1/S-Specific Transcription	29	2	3.21	0.037	7.47
																																						Myogenesis	29	2	3.21	0.037	7.47
																																						PIWI-interacting RNA (piRNA) biogenesis	29	2	3.21	0.037	7.47
																																						Interferon gamma signaling	95	4	3.18	0.018	4.47
																																						Regulation of Homotypic Cell-Cell Adhesion	30	2	3.14	0.039	7.21
																																						RMTs methylate histone arginines	30	2	3.14	0.039	7.21
																																						Mitotic Metaphase and Anaphase	235	7	3.1	0.011	3.16
																																						HCMV Infection	98	4	3.1	0.02	4.33
																																						Defective CFTR causes cystic fibrosis	61	3	3.1	0.026	5.24
																																						Diseases of Immune System	31	2	3.07	0.042	6.95
																																						Ca2+ pathway	62	3	3.06	0.027	5.15
																																						Peroxisomal protein import	62	3	3.06	0.027	5.15
																																						Separation of Sister Chromatids	190	6	3.03	0.014	3.34
																																						TNFR2 non-canonical NF-kB pathway	101	4	3.02	0.021	4.19
																																						G-protein beta:gamma signalling	32	2	3	0.044	6.72
																																						Thrombin signalling through proteinase activated receptors (PARs)	32	2	3	0.044	6.72
																																						Asymmetric localization of PCP proteins	64	3	2.99	0.029	4.98
																																						Hedgehog ligand biogenesis	65	3	2.95	0.03	4.9
																																						Activation of the pre-replicative complex	33	2	2.94	0.047	6.51
																																						FGFR2 mutant receptor activation	33	2	2.94	0.047	6.51
																																						G alpha (s) signalling events	149	5	2.93	0.02	3.54
																																						Lysosome Vesicle Biogenesis	34	2	2.88	0.049	6.3
																																						Signaling by GPCR	683	14	2.85	0.01	2.19
																																						Late SARS-CoV-2 Infection Events	68	3	2.85	0.034	4.67
																																						Transcription of the HIV genome	70	3	2.79	0.036	4.53
																																						RHO GTPase cycle	440	10	2.75	0.015	2.41
																																						Cell junction organization	114	4	2.72	0.031	3.7
																																						Transmission across Chemical Synapses	268	7	2.7	0.021	2.75
																																						G alpha (q) signalling events	215	6	2.68	0.024	2.94
																																						Mitochondrial biogenesis	74	3	2.66	0.041	4.28
																																						Regulation of expression of SLITs and ROBOs	170	5	2.58	0.031	3.09
																																						ABC transporter disorders	78	3	2.55	0.047	4.05
																																						Resolution of Sister Chromatid Cohesion	125	4	2.5	0.04	3.36
																																						Neutrophil degranulation	465	9	2.08	0.047	2.03

## Sheet: Table S2.3
Table S2.3.1 Top prioritized targets from the integrated Si method for East Asian Adipose																	Table S2.3.2 Pathway enrichment of top 100 genes of East Asian Adipose
Target gene	Priority		Genomic predictors			Seeds	Annotation predictors			Crosstalk	Novelty		Druggability		Description		Pathway	Pathway Size	Overlap Count	Z-score	Adjusted P-value	Odds Ratio
	rank	rating	nGene	cGene	eGene		fGene	pGene	dGene		PCOS drug traget	Approved for other diseases	PDBs	PDBs (with pockets)			Hormone ligand-binding receptors	12	9	33.5	1.9e-16	547
SUOX	1	5	1	1	4	Y	1	0	0	Y	N	N	1	0	sulfite oxidase		Peptide hormone biosynthesis	14	8	27.5	3.7e-13	241
LHCGR	2	4.4178	1	0	2	Y	1	0	0	Y	P3	Y	4	2	luteinizing hormone/choriogonadotropin receptor		TFAP2 (AP-2) family regulates transcription of growth factors and their receptors	15	6	19.8	9.7e-09	117
DENND1A	3	4.36073	1	0	4	Y	1	0	0	Y	N	N	1	1	DENN domain containing 1A		Downregulation of ERBB2:ERBB3 signaling	13	5	17.7	2.3e-07	109
CYB5R2	4	4.32262	0	0	0	N	0	0	0	Y	N	N	0	0	cytochrome b5 reductase 2		PI3K events in ERBB2 signaling	16	6	19.2	1.4e-08	106
PAPSS2	5	4.30253	0	0	0	N	0	0	0	Y	N	N	3	0	3'-phosphoadenosine 5'-phosphosulfate synthase 2		Degradation of cysteine and homocysteine	15	5	16.5	4.9e-07	87
ETHE1	6	4.26956	0	0	0	N	0	0	0	Y	N	N	1	0	ETHE1, persulfide dioxygenase		ERBB2 Activates PTK6 Signaling	13	4	14.1	1.2e-05	76.8
FSHB	7	4.16999	1	0	0	Y	1	1	1	Y	N	N	4	1	follicle stimulating hormone beta subunit		Glucagon-type ligand receptors	33	9	19.9	1.7e-11	68.3
NPVF	8	4.1662	0	0	0	N	0	0	0	N	N	N	0	0	neuropeptide VF precursor		Androgen biosynthesis	11	3	11.5	0.00024	64.2
GPHN	9	4.15184	0	0	0	N	0	0	0	Y	N	N	1	0	gephyrin		ERBB2 Regulates Cell Motility	15	4	13.1	2e-05	62.8
RPS26	10	4.14645	1	1	2	Y	1	0	0	Y	N	Y	15	3	ribosomal protein S26		Constitutive Signaling by Ligand-Responsive EGFR Cancer Variants	19	5	14.6	1.6e-06	62.3
SQOR	11	4.09716	0	0	0	N	0	0	0	Y	N	N	7	7	sulfide quinone oxidoreductase		Listeria monocytogenes entry into host cells	20	5	14.2	1.8e-06	58.2
TST	12	4.08729	0	0	0	N	0	0	0	Y	N	N	0	0	thiosulfate sulfurtransferase		GRB2 events in ERBB2 signaling	16	4	12.7	2.4e-05	57.6
MPST	13	4.08087	0	0	0	N	0	0	0	Y	N	N	2	1	mercaptopyruvate sulfurtransferase		Signaling by ERBB2 ECD mutants	16	4	12.7	2.4e-05	57.6
IKZF4	14	4.05341	1	1	1	Y	1	0	1	N	N	N	1	0	IKAROS family zinc finger 4		Spry regulation of FGF signaling	16	4	12.7	2.4e-05	57.6
PAPSS1	15	4.02929	0	0	0	N	0	0	0	Y	N	N	8	1	3'-phosphoadenosine 5'-phosphosulfate synthase 1		GAB1 signalosome	17	4	12.3	3e-05	53.1
ZNF576	16	3.96915	0	0	0	N	0	0	0	N	N	N	0	0	zinc finger protein 576		Signaling by ERBB2 in Cancer	26	6	14.9	2.3e-07	52.9
TBPL1	17	3.88795	0	0	0	N	0	0	0	N	N	N	0	0	TATA-box binding protein like 1		SHC1 events in ERBB2 signaling	22	5	13.5	3e-06	51.4
DENND1B	18	3.87914	0	0	0	N	0	0	0	Y	N	N	1	1	DENN domain containing 1B		Chk1/Chk2(Cds1) mediated inactivation of Cyclin B:Cdk1 complex	13	3	10.5	0.00037	51.4
FSHR	19	3.85349	1	0	0	Y	1	0	1	Y	P3	Y	3	0	follicle stimulating hormone receptor		Suppression of phagosomal maturation	13	3	10.5	0.00037	51.4
CYCS	20	3.82602	0	0	0	N	0	0	0	Y	N	N	13	2	cytochrome c, somatic		G alpha (s) signalling events	149	26	26.8	1e-28	47.1
STON1-GTF2A1L	21	3.77414	1	0	3	Y	0	0	1	N	N	N	0	0	STON1-GTF2A1L readthrough		Downregulation of ERBB2 signaling	29	6	14.1	4.3e-07	46
GPHA2	22	3.77069	0	0	0	N	0	0	0	Y	N	N	0	0	glycoprotein hormone alpha 2		Signaling by EGFR in Cancer	25	5	12.6	5.8e-06	43.6
RAB35	23	3.75739	0	0	0	N	0	0	0	Y	N	N	4	3	RAB35, member RAS oncogene family		Constitutive Signaling by EGFRvIII	15	3	9.76	0.00054	42.8
RAB5B	24	3.75287	1	0	2	Y	1	0	0	N	N	N	1	0	RAB5B, member RAS oncogene family		InlB-mediated entry of Listeria monocytogenes into host cell	15	3	9.76	0.00054	42.8
MADD	25	3.7405	0	0	0	N	0	0	0	Y	N	N	0	0	MAP kinase activating death domain		IRAK2 mediated activation of TAK1 complex	10	2	7.97	0.005	42.4
CGA	26	3.71099	0	0	0	N	0	0	0	Y	N	N	13	5	glycoprotein hormones, alpha polypeptide		MET receptor recycling	10	2	7.97	0.005	42.4
CGB5	27	3.70006	0	0	0	N	0	0	0	Y	N	N	0	0	chorionic gonadotropin beta subunit 5		Reactions specific to the complex N-glycan synthesis pathway	10	2	7.97	0.005	42.4
GTF2A1L	28	3.69885	0	0	3	Y	1	0	0	N	N	N	0	0	general transcription factor IIA subunit 1 like		Thyroxine biosynthesis	10	2	7.97	0.005	42.4
TSHR	29	3.69506	0	0	0	N	0	0	0	Y	N	Y	2	0	thyroid stimulating hormone receptor		Signaling by ERBB2	50	9	16	7.9e-10	40
POMC	30	3.66735	0	0	0	N	0	0	0	Y	N	N	1	0	proopiomelanocortin		VLDLR internalisation and degradation	16	3	9.43	0.00063	39.5
TSHB	31	3.63841	0	0	0	N	0	0	0	Y	N	N	0	0	thyroid stimulating hormone beta		Sulfur amino acid metabolism	28	5	11.9	9.3e-06	38
ERBB3	32	3.62842	1	1	0	Y	1	0	1	Y	N	Y	21	8	erb-b2 receptor tyrosine kinase 3		Alpha-protein kinase 1 signaling pathway	11	2	7.57	0.0056	37.6
YWHAE	33	3.61447	0	0	0	N	0	0	0	Y	N	N	5	0	tyrosine 3-monooxygenase/tryptophan 5-monooxygenase activation protein epsilon		Constitutive Signaling by Overexpressed ERBB2	11	2	7.57	0.0056	37.6
GPHB5	34	3.60829	0	0	0	N	0	0	0	Y	N	N	0	0	glycoprotein hormone beta 5		MET activates RAP1 and RAC1	11	2	7.57	0.0056	37.6
CLTC	35	3.60249	0	0	0	N	0	0	0	Y	N	N	6	0	clathrin heavy chain		Pexophagy	11	2	7.57	0.0056	37.6
TBP	36	3.6008	0	0	0	N	0	0	0	Y	N	N	39	8	TATA-box binding protein		Regulation of BACH1 activity	11	2	7.57	0.0056	37.6
GTF2B	37	3.58907	0	0	0	N	0	0	0	Y	N	N	29	7	general transcription factor IIB		Signaling by FGFR4 in disease	11	2	7.57	0.0056	37.6
CGB3	38	3.572	0	0	0	N	0	0	0	Y	N	N	0	0	chorionic gonadotropin beta subunit 3		TICAM1,TRAF6-dependent induction of TAK1 complex	11	2	7.57	0.0056	37.6
GTF2A2	39	3.54011	0	0	0	N	0	0	0	Y	N	N	28	4	general transcription factor IIA subunit 2		APC/C:Cdc20 mediated degradation of Cyclin B	24	4	10.2	0.0001	34.6
GCG	40	3.53649	0	0	0	N	0	0	0	Y	N	N	33	8	glucagon		G-protein activation	24	4	10.2	0.0001	34.6
HADHB	41	3.5324	0	0	0	N	0	0	0	N	N	N	3	2	hydroxyacyl-CoA dehydrogenase/3-ketoacyl-CoA thiolase/enoyl-CoA hydratase (trifunctional protein), beta subunit		Incretin synthesis, secretion, and inactivation	24	4	10.2	0.0001	34.6
GNAS	42	3.52562	0	0	0	N	0	0	0	N	N	N	118	48	GNAS complex locus		Regulation of NF-kappa B signaling	18	3	8.85	0.00087	34.2
CGB8	43	3.46465	0	0	0	N	0	0	0	N	N	N	6	3	chorionic gonadotropin beta subunit 8		Gap junction degradation	12	2	7.23	0.0062	33.9
EGFR	44	3.46331	0	0	0	N	0	0	0	Y	N	Y	252	131	epidermal growth factor receptor		Josephin domain DUBs	12	2	7.23	0.0062	33.9
GNB1	45	3.45243	0	0	0	N	0	0	0	N	N	N	264	83	G protein subunit beta 1		SARS-CoV-2 targets host intracellular signalling and regulatory pathways	12	2	7.23	0.0062	33.9
APP	46	3.44047	0	0	0	N	0	0	0	Y	N	Y	96	30	amyloid beta precursor protein		TICAM1-dependent activation of IRF3/IRF7	12	2	7.23	0.0062	33.9
GNG2	47	3.43742	0	0	0	N	0	0	0	N	N	N	263	83	G protein subunit gamma 2		Transcriptional regulation by the AP-2 (TFAP2) family of transcription factors	38	6	12.2	1.8e-06	33.1
GAK	48	3.43657	0	0	0	N	0	0	0	N	N	N	7	2	cyclin G associated kinase		Peptide hormone metabolism	88	13	17.3	4e-13	33
NPPA	49	3.42608	0	0	0	N	0	0	0	N	N	N	2	0	natriuretic peptide A		ADP signalling through P2Y purinoceptor 1	25	4	10	0.00012	32.9
GNAQ	50	3.41808	0	0	0	N	0	0	0	N	N	N	8	2	G protein subunit alpha q		Prostacyclin signalling through prostacyclin receptor	19	3	8.6	0.00095	32.1
RIN1	51	3.40723	0	0	0	N	0	0	0	N	N	N	0	0	Ras and Rab interactor 1		Regulation of TP53 Activity through Methylation	19	3	8.6	0.00095	32.1
ADCYAP1	52	3.39279	0	0	0	N	0	0	0	N	N	N	8	3	adenylate cyclase activating polypeptide 1		Signal amplification	33	5	10.9	1.9e-05	31.2
CDK2	53	3.38912	1	0	0	Y	1	0	0	N	N	N	428	239	cyclin dependent kinase 2		NF-kB is activated and signals survival	13	2	6.92	0.0069	30.8
LHB	54	3.35533	0	0	0	N	0	0	0	N	N	N	0	0	luteinizing hormone beta polypeptide		p75NTR recruits signalling complexes	13	2	6.92	0.0069	30.8
AGT	55	3.33658	0	0	0	N	0	0	0	N	N	N	6	5	angiotensinogen		Synthesis, secretion, and inactivation of Glucose-dependent Insulinotropic Polypeptide (GIP)	13	2	6.92	0.0069	30.8
GIP	56	3.335	0	0	0	N	0	0	0	N	N	N	8	0	gastric inhibitory polypeptide		TRAF6 mediated IRF7 activation in TLR7/8 or 9 signaling	13	2	6.92	0.0069	30.8
VIP	57	3.32484	0	0	0	N	0	0	0	N	N	N	2	0	vasoactive intestinal peptide		WNT5A-dependent internalization of FZD2, FZD5 and ROR2	13	2	6.92	0.0069	30.8
IKZF3	58	3.32184	1	0	0	Y	0	0	1	N	N	N	0	0	IKAROS family zinc finger 3		Zygotic genome activation (ZGA)	13	2	6.92	0.0069	30.8
YWHAB	59	3.31162	0	0	0	N	0	0	0	N	N	N	13	4	tyrosine 3-monooxygenase/tryptophan 5-monooxygenase activation protein beta		Signaling by Hippo	20	3	8.36	0.0011	30.2
IKZF1	60	3.30302	0	0	0	N	0	0	0	N	N	N	3	0	IKAROS family zinc finger 1		Signaling by ERBB4	58	8	13.1	6.8e-08	28.8
SIN3A	61	3.30044	0	0	0	N	0	0	0	N	N	N	0	0	SIN3 transcription regulator family member A		Negative regulation of MET activity	21	3	8.15	0.0012	28.5
RAB5A	62	3.29301	0	0	0	N	0	0	0	N	N	N	13	4	RAB5A, member RAS oncogene family		Synthesis, secretion, and inactivation of Glucagon-like Peptide-1 (GLP-1)	21	3	8.15	0.0012	28.5
PICALM	63	3.27217	0	0	0	N	0	0	0	N	N	N	0	0	phosphatidylinositol binding clathrin assembly protein		Glycogen synthesis	14	2	6.65	0.0076	28.3
CLTB	64	3.26834	0	0	0	N	0	0	0	N	N	N	0	0	clathrin light chain B		IRAK1 recruits IKK complex	14	2	6.65	0.0076	28.3
GPR119	65	3.25143	0	0	0	N	0	0	0	N	N	N	0	0	G protein-coupled receptor 119		Physiological factors	14	2	6.65	0.0076	28.3
ATL2	66	3.24626	0	0	0	N	0	0	0	N	N	N	0	0	atlastin GTPase 2		Regulation of innate immune responses to cytosolic DNA	14	2	6.65	0.0076	28.3
ANAPC15	67	3.23707	0	0	0	N	0	0	0	N	N	N	13	5	anaphase promoting complex subunit 15		SHC1 events in EGFR signaling	14	2	6.65	0.0076	28.3
IKZF5	68	3.2136	0	0	0	N	0	0	0	N	N	N	0	0	IKAROS family zinc finger 5		SHC1 events in ERBB4 signaling	14	2	6.65	0.0076	28.3
CANX	69	3.20173	0	0	0	N	0	0	0	N	N	N	0	0	calnexin		TP53 Regulates Transcription of Genes Involved in G1 Cell Cycle Arrest	14	2	6.65	0.0076	28.3
NRG1	70	3.19747	0	0	0	N	0	0	0	N	N	N	6	0	neuregulin 1		YAP1- and WWTR1 (TAZ)-stimulated gene expression	14	2	6.65	0.0076	28.3
TBPL2	71	3.18968	0	0	0	N	0	0	0	N	N	N	0	0	TATA-box binding protein like 2		Negative regulation of FGFR3 signaling	29	4	9.23	0.0002	27.7
TP53	72	3.18617	0	0	0	N	0	0	0	N	N	N	170	63	tumor protein p53		Regulation of TP53 Expression and Degradation	37	5	10.2	3e-05	27.3
GSDMB	73	3.18274	1	0	2	Y	1	0	0	N	N	N	0	0	gasdermin B		ADP signalling through P2Y purinoceptor 12	22	3	7.94	0.0013	27
UBA52	74	3.18033	0	0	0	N	0	0	0	N	N	N	43	19	ubiquitin A-52 residue ribosomal protein fusion product 1		Regulation of signaling by CBL	22	3	7.94	0.0013	27
GIPR	75	3.17839	0	0	0	N	0	0	0	N	N	Y	9	0	gastric inhibitory polypeptide receptor		Signaling by PTK6	54	7	11.8	7.3e-07	26.5
GNAI2	76	3.17505	0	0	0	N	0	0	0	N	N	N	9	1	G protein subunit alpha i2		Activation of BAD and translocation to mitochondria	15	2	6.4	0.0082	26.1
FOXP3	77	3.15807	0	0	0	N	0	0	0	N	N	N	2	1	forkhead box P3		Glycogen storage diseases	15	2	6.4	0.0082	26.1
ERBB2	78	3.15387	0	0	0	N	0	0	0	N	N	Y	31	14	erb-b2 receptor tyrosine kinase 2		GRB2:SOS provides linkage to MAPK signaling for Integrins	15	2	6.4	0.0082	26.1
GRB2	79	3.15357	0	0	0	N	0	0	0	N	N	N	54	27	growth factor receptor bound protein 2		Negative regulation of FLT3	15	2	6.4	0.0082	26.1
DHX9	80	3.15178	0	0	0	N	0	0	0	N	N	N	3	1	DExH-box helicase 9		Signaling by NOTCH1 HD Domain Mutants in Cancer	15	2	6.4	0.0082	26.1
VIPR2	81	3.15143	0	0	0	N	0	0	0	N	N	N	3	0	vasoactive intestinal peptide receptor 2		Signal regulatory protein family interactions	15	2	6.4	0.0082	26.1
DRD5	82	3.14731	0	0	0	N	0	0	0	N	N	Y	0	0	dopamine receptor D5		WNT5A-dependent internalization of FZD4	15	2	6.4	0.0082	26.1
GTSE1	83	3.14464	0	0	0	N	0	0	0	N	N	N	2	0	G2 and S-phase expressed 1		Response of Mtb to phagocytosis	23	3	7.75	0.0014	25.7
GAB1	84	3.14217	0	0	0	N	0	0	0	N	N	N	0	0	GRB2 associated binding protein 1		EGFR downregulation	31	4	8.9	0.00024	25.6
RPS27A	85	3.14171	0	0	0	N	0	0	0	N	N	Y	46	14	ribosomal protein S27a		Negative regulation of FGFR4 signaling	31	4	8.9	0.00024	25.6
CTBP1	86	3.13945	0	0	0	N	0	0	0	N	N	N	9	1	C-terminal binding protein 1		Signaling by CSF1 (M-CSF) in myeloid cells	31	4	8.9	0.00024	25.6
ADORA2A	87	3.13712	0	0	0	N	0	0	0	N	N	Y	62	58	adenosine A2a receptor		Signaling by FGFR3	40	5	9.78	4e-05	24.9
TUFM	88	3.13596	0	0	0	N	0	0	0	N	N	N	0	0	Tu translation elongation factor, mitochondrial		Thrombin signalling through proteinase activated receptors (PARs)	32	4	8.75	0.00027	24.7
MC2R	89	3.13035	0	0	0	N	0	0	0	N	N	Y	0	0	melanocortin 2 receptor		Thromboxane signalling through TP receptor	24	3	7.57	0.0016	24.4
YAP1	90	3.11601	1	0	0	Y	1	0	0	N	N	N	27	17	Yes associated protein 1		Signaling by FGFR4	41	5	9.65	4.4e-05	24.2
CDK1	91	3.10365	0	0	0	N	0	0	0	N	N	N	11	6	cyclin dependent kinase 1		Assembly Of The HIV Virion	16	2	6.18	0.009	24.2
SRC	92	3.10325	0	0	0	N	0	0	0	N	N	Y	62	14	SRC proto-oncogene, non-receptor tyrosine kinase		MAP3K8 (TPL2)-dependent MAPK1/3 activation	16	2	6.18	0.009	24.2
LIMA1	93	3.09662	0	0	0	N	0	0	0	N	N	N	1	0	LIM domain and actin binding 1		NRIF signals cell death from the nucleus	16	2	6.18	0.009	24.2
GIPC1	94	3.09653	0	0	0	N	0	0	0	N	N	N	0	0	GIPC PDZ domain containing family member 1		p75NTR signals via NF-kB	16	2	6.18	0.009	24.2
NPR1	95	3.09496	0	0	0	N	0	0	0	N	N	Y	0	0	natriuretic peptide receptor 1		Regulation of KIT signaling	16	2	6.18	0.009	24.2
HTR6	96	3.08833	0	0	0	N	0	0	0	N	N	Y	0	0	5-hydroxytryptamine receptor 6		SARS-CoV-1 targets host intracellular signalling and regulatory pathways	16	2	6.18	0.009	24.2
CDH1	97	3.08417	0	0	0	N	0	0	0	N	N	N	15	3	cadherin 1		TGF-beta receptor signaling in EMT (epithelial to mesenchymal transition)	16	2	6.18	0.009	24.2
PTGER2	98	3.08356	0	0	0	N	0	0	0	N	N	Y	3	2	prostaglandin E receptor 2		TRAF6-mediated induction of TAK1 complex within TLR4 complex	16	2	6.18	0.009	24.2
RAB5C	99	3.08106	0	0	0	N	0	0	0	N	N	N	1	1	RAB5C, member RAS oncogene family		Signaling by EGFR	50	6	10.5	7.9e-06	24
APPL1	100	3.07721	0	0	0	N	0	0	0	N	N	N	8	5	adaptor protein, phosphotyrosine interacting with PH domain and leucine zipper 1		Glucagon signaling in metabolic regulation	33	4	8.6	0.0003	23.8
INSR	101	3.07447	1	0	0	Y	1	0	0	N	N	Y	55	25	insulin receptor		Negative regulation of FGFR1 signaling	33	4	8.6	0.0003	23.8
MOV10	102	3.07265	0	0	0	N	0	0	0	N	N	N	0	0	Mov10 RISC complex RNA helicase		Calnexin/calreticulin cycle	25	3	7.4	0.0017	23.3
CDA	103	3.06962	0	0	0	N	0	0	0	N	N	Y	1	0	cytidine deaminase		Defective Intrinsic Pathway for Apoptosis	25	3	7.4	0.0017	23.3
ELAVL1	104	3.04741	0	0	0	N	0	0	0	N	N	N	10	1	ELAV like RNA binding protein 1		NOTCH3 Activation and Transmission of Signal to the Nucleus	25	3	7.4	0.0017	23.3
DRD1	105	3.03927	0	0	0	N	0	0	0	N	N	Y	19	5	dopamine receptor D1		Signaling by NTRK2 (TRKB)	25	3	7.4	0.0017	23.3
HSP90AB1	106	3.02715	0	0	0	N	0	0	0	N	N	N	13	5	heat shock protein 90 alpha family class B member 1		Signaling by FGFR1	52	6	10.3	9.5e-06	23
GDI1	107	3.02709	0	0	0	N	0	0	0	N	N	N	0	0	GDP dissociation inhibitor 1		Negative regulation of FGFR2 signaling	34	4	8.46	0.00033	23
LRRK2	108	3.02695	0	0	0	N	0	0	0	N	N	N	17	4	leucine rich repeat kinase 2		Activation of IRF3, IRF7 mediated by TBK1, IKBKE	17	2	5.98	0.0099	22.6
CTNNB1	109	3.02632	0	0	0	N	0	0	0	N	N	N	20	13	catenin beta 1		Signaling by NTRK3 (TRKC)	17	2	5.98	0.0099	22.6
GDI2	110	3.0253	0	0	0	N	0	0	0	N	N	N	0	0	GDP dissociation inhibitor 2		Translesion synthesis by POLK	17	2	5.98	0.0099	22.6
CHST9	111	3.00905	0	0	0	N	0	0	0	N	N	N	0	0	carbohydrate sulfotransferase 9		APC-Cdc20 mediated degradation of Nek2A	26	3	7.25	0.0019	22.3
PA2G4	112	3.00358	1	0	0	Y	1	0	0	N	N	N	3	2	proliferation-associated 2G4		GPER1 signaling	45	5	9.17	6.7e-05	21.8
ABL1	113	3.00245	0	0	0	N	0	0	0	N	N	Y	73	28	ABL proto-oncogene 1, non-receptor tyrosine kinase		Infection with Mycobacterium tuberculosis	27	3	7.1	0.0021	21.4
GAPVD1	114	2.99726	0	0	0	N	0	0	0	N	N	N	0	0	GTPase activating protein and VPS9 domains 1		Gastrin-CREB signalling pathway via PKC and MAPK	18	2	5.79	0.011	21.2
EED	115	2.99106	0	0	0	N	0	0	0	N	N	N	64	2	embryonic ectoderm development		Metabolism of amine-derived hormones	18	2	5.79	0.011	21.2
ADRB1	116	2.9874	0	0	0	N	0	0	0	N	N	Y	5	4	adrenoceptor beta 1		PI-3K cascade:FGFR3	18	2	5.79	0.011	21.2
INS	117	2.98513	0	0	0	N	0	0	0	N	N	N	291	148	insulin		TP53 Regulates Transcription of Genes Involved in G2 Cell Cycle Arrest	18	2	5.79	0.011	21.2
IGF1R	118	2.9838	0	0	0	N	0	0	0	N	N	Y	31	20	insulin like growth factor 1 receptor		RAB GEFs exchange GTP for GDP on RABs	88	9	11.8	8.4e-08	20.7
PIK3C3	119	2.97297	0	0	0	N	0	0	0	N	N	N	17	8	phosphatidylinositol 3-kinase catalytic subunit type 3		Adrenaline,noradrenaline inhibits insulin secretion	28	3	6.95	0.0023	20.5
KRAS	120	2.97091	0	0	0	N	0	0	0	N	N	Y	213	42	KRAS proto-oncogene, GTPase		FLT3 signaling in disease	28	3	6.95	0.0023	20.5
SIN3B	121	2.96937	0	0	0	N	0	0	0	N	N	N	0	0	SIN3 transcription regulator family member B		Ovarian tumor domain proteases	38	4	7.95	0.00047	20.3
NRAS	122	2.96833	0	0	0	N	0	0	0	N	N	N	8	1	NRAS proto-oncogene, GTPase		TICAM1, RIP1-mediated IKK complex recruitment	19	2	5.62	0.012	19.9
PLCG1	123	2.9617	0	0	0	N	0	0	0	N	N	N	5	0	phospholipase C gamma 1		Translesion Synthesis by POLH	19	2	5.62	0.012	19.9
PTK2B	124	2.9591	0	0	0	N	0	0	0	N	N	N	23	13	protein tyrosine kinase 2 beta		Class B/2 (Secretin family receptors)	92	9	11.5	1.2e-07	19.7
HDAC5	125	2.95221	0	0	0	N	0	0	0	N	N	Y	0	0	histone deacetylase 5		Mitophagy	29	3	6.82	0.0025	19.7
JUN	126	2.94965	0	0	0	N	0	0	0	N	N	N	8	1	Jun proto-oncogene, AP-1 transcription factor subunit		Translation of SARS-CoV-1 Structural Proteins	29	3	6.82	0.0025	19.7
HRAS	127	2.94889	0	0	0	N	0	0	0	N	N	N	203	33	HRas proto-oncogene, GTPase		Activation of BH3-only proteins	30	3	6.69	0.0027	19
MOCS1	128	2.94419	0	0	0	N	0	0	0	N	N	N	0	0	molybdenum cofactor synthesis 1		Signaling by CSF3 (G-CSF)	30	3	6.69	0.0027	19
MYC	129	2.93928	0	0	0	N	0	0	0	N	N	N	10	4	MYC proto-oncogene, bHLH transcription factor		ER Quality Control Compartment (ERQC)	20	2	5.46	0.012	18.8
FFAR2	130	2.93214	0	0	0	N	0	0	0	N	N	N	0	0	free fatty acid receptor 2		G beta:gamma signalling through CDC42	20	2	5.46	0.012	18.8
RABGEF1	131	2.9297	0	0	0	N	0	0	0	N	N	N	8	5	RAB guanine nucleotide exchange factor 1		Metalloprotease DUBs	20	2	5.46	0.012	18.8
FN1	132	2.9185	0	0	0	N	0	0	0	N	N	Y	63	13	fibronectin 1		Phosphorylation of the APC/C	20	2	5.46	0.012	18.8
SMAD2	133	2.91032	0	0	0	N	0	0	0	N	N	N	9	2	SMAD family member 2		PI-3K cascade:FGFR4	20	2	5.46	0.012	18.8
MOCS3	134	2.90942	0	0	0	N	0	0	0	N	N	N	1	1	molybdenum cofactor synthesis 3		Signaling by KIT in disease	20	2	5.46	0.012	18.8
IKZF2	135	2.90909	0	0	0	N	0	0	0	N	N	N	1	0	IKAROS family zinc finger 2		Signalling to RAS	20	2	5.46	0.012	18.8
IGF1	136	2.90776	0	0	0	N	0	0	0	N	N	N	21	4	insulin like growth factor 1		Glucagon-like Peptide-1 (GLP1) regulates insulin secretion	42	4	7.52	0.00064	18.2
AKT1	137	2.90714	0	0	0	N	0	0	0	N	N	N	35	7	AKT serine/threonine kinase 1		PI-3K cascade:FGFR1	21	2	5.31	0.013	17.8
HDAC4	138	2.9071	0	0	0	N	0	0	0	N	N	Y	14	3	histone deacetylase 4		Presynaptic function of Kainate receptors	21	2	5.31	0.013	17.8
CHD4	139	2.90426	0	0	0	N	0	0	0	N	N	N	10	2	chromodomain helicase DNA binding protein 4		Regulation of FZD by ubiquitination	21	2	5.31	0.013	17.8
RABAC1	140	2.90174	0	0	0	N	0	0	0	N	N	N	0	0	Rab acceptor 1		ADORA2B mediated anti-inflammatory cytokines production	43	4	7.42	0.0007	17.7
CUL3	141	2.89624	0	0	0	N	0	0	0	N	N	N	6	4	cullin 3		Nuclear signaling by ERBB4	32	3	6.45	0.0032	17.7
FOXO1	142	2.89535	0	0	0	N	0	0	0	N	N	N	7	1	forkhead box O1		Constitutive Signaling by Aberrant PI3K in Cancer	78	7	9.62	6.7e-06	17.6
HDAC7	143	2.8931	0	0	0	N	0	0	0	N	N	Y	5	0	histone deacetylase 7		TAK1-dependent IKK and NF-kappa-B activation	44	4	7.32	0.00075	17.3
RUNX1	144	2.89127	0	0	0	N	0	0	0	N	N	N	5	3	runt related transcription factor 1		TBC/RABGAPs	44	4	7.32	0.00075	17.3
ARRB2	145	2.8896	0	0	0	N	0	0	0	N	N	N	0	0	arrestin beta 2		Metabolism of steroid hormones	33	3	6.34	0.0035	17.1
GLP1R	146	2.88721	0	0	0	N	0	0	0	N	P2	Y	47	20	glucagon like peptide 1 receptor		Oncogene Induced Senescence	33	3	6.34	0.0035	17.1
MOCOS	147	2.88674	0	0	0	N	0	0	0	N	N	N	0	0	molybdenum cofactor sulfurase		Chaperone Mediated Autophagy	22	2	5.17	0.014	17
EP300	148	2.88531	0	0	0	N	0	0	0	N	N	N	42	26	E1A binding protein p300		Cytosolic sulfonation of small molecules	22	2	5.17	0.014	17
IGF2	149	2.88193	0	0	0	N	0	0	0	N	N	N	11	2	insulin like growth factor 2		JNK (c-Jun kinases) phosphorylation and activation mediated by activated human TAK1	22	2	5.17	0.014	17
STAT3	150	2.87021	0	0	0	N	0	0	0	N	N	N	4	2	signal transducer and activator of transcription 3		NOTCH2 Activation and Transmission of Signal to the Nucleus	22	2	5.17	0.014	17
GABRG2	151	2.86852	0	0	0	N	0	0	0	N	N	Y	16	14	gamma-aminobutyric acid type A receptor gamma2 subunit		PINK1-PRKN Mediated Mitophagy	22	2	5.17	0.014	17
PRKACA	152	2.86838	0	0	0	N	0	0	0	N	N	N	43	25	protein kinase cAMP-activated catalytic subunit alpha		RAS processing	22	2	5.17	0.014	17
S100A10	153	2.86512	0	0	0	N	0	0	0	N	N	N	7	3	S100 calcium binding protein A10		Lysosome Vesicle Biogenesis	34	3	6.23	0.0037	16.6
PMEL	154	2.85961	1	0	1	Y	1	1	0	N	N	Y	0	0	premelanosome protein		N-glycan trimming in the ER and Calnexin/Calreticulin cycle	34	3	6.23	0.0037	16.6
NFKBIA	155	2.85518	0	0	0	N	0	0	0	N	N	N	3	1	NFKB inhibitor alpha		Signalling to ERKs	34	3	6.23	0.0037	16.6
PIK3CA	156	2.85401	0	0	0	N	0	0	0	N	N	Y	63	23	phosphatidylinositol-4,5-bisphosphate 3-kinase catalytic subunit alpha		Bacterial Infection Pathways	70	6	8.68	4e-05	16.5
CHST8	157	2.85355	0	0	0	N	0	0	0	N	N	N	0	0	carbohydrate sulfotransferase 8		trans-Golgi Network Vesicle Budding	71	6	8.61	4.2e-05	16.3
CHM	158	2.85317	0	0	0	N	0	0	0	N	N	N	0	0	CHM, Rab escort protein 1		Cyclin D associated events in G1	47	4	7.05	0.00093	16.1
HSPD1	159	2.85046	0	0	0	N	0	0	0	N	N	N	5	3	heat shock protein family D (Hsp60) member 1		activated TAK1 mediates p38 MAPK activation	23	2	5.04	0.015	16.1
NEDD8	160	2.85014	0	0	0	N	0	0	0	N	N	N	23	15	neural precursor cell expressed, developmentally down-regulated 8		IKK complex recruitment mediated by RIP1	23	2	5.04	0.015	16.1
RAB7A	161	2.84995	0	0	0	N	0	0	0	N	N	N	6	2	RAB7A, member RAS oncogene family		Long-term potentiation	23	2	5.04	0.015	16.1
EEF1A1	162	2.84362	0	0	0	N	0	0	0	N	N	N	0	0	eukaryotic translation elongation factor 1 alpha 1		PI-3K cascade:FGFR2	23	2	5.04	0.015	16.1
RELA	163	2.84183	0	0	0	N	0	0	0	N	N	N	5	3	RELA proto-oncogene, NF-kB subunit		G alpha (z) signalling events	48	4	6.97	0.00096	15.7
CSNK1D	164	2.83794	0	0	0	N	0	0	0	N	N	N	34	2	casein kinase 1 delta		Signaling by NOTCH3	49	4	6.88	0.001	15.4
FHL2	165	2.83733	0	0	0	N	0	0	0	N	N	N	4	0	four and a half LIM domains 2		RUNX2 regulates osteoblast differentiation	24	2	4.92	0.016	15.4
MDM2	166	2.8372	0	0	0	N	0	0	0	N	N	N	122	90	MDM2 proto-oncogene		Clathrin-mediated endocytosis	145	11	11	4.1e-08	15.2
KPNA2	167	2.8364	0	0	1	Y	1	0	0	N	N	N	11	5	karyopherin subunit alpha 2		Plasma lipoprotein clearance	37	3	5.94	0.0046	15.1
EEA1	168	2.83416	0	0	0	N	0	0	0	N	N	N	4	1	early endosome antigen 1		Rab regulation of trafficking	120	9	9.85	9.2e-07	14.7
HDAC2	169	2.8336	0	0	0	N	0	0	0	N	N	Y	27	0	histone deacetylase 2		Regulation of insulin secretion	78	6	8.15	6.7e-05	14.7
ESR1	170	2.83257	0	0	0	N	0	0	0	N	P4	N	307	291	estrogen receptor 1		Cooperation of PDCL (PhLP1) and TRiC/CCT in G-protein beta folding	38	3	5.84	0.0049	14.7
PIK3R1	171	2.82804	0	0	0	N	0	0	0	N	N	N	65	19	phosphoinositide-3-kinase regulatory subunit 1		FLT3 Signaling	38	3	5.84	0.0049	14.7
MOCS2	172	2.82725	0	0	0	N	0	0	0	N	N	N	2	1	molybdenum cofactor synthesis 2		Cyclin A/B1/B2 associated events during G2/M transition	25	2	4.81	0.017	14.7
NTRK1	173	2.82418	0	0	0	N	0	0	0	N	N	Y	53	36	neurotrophic receptor tyrosine kinase 1		Downstream signaling of activated FGFR3	25	2	4.81	0.017	14.7
GTF2A1	174	2.82323	0	0	0	N	0	0	0	N	N	N	28	4	general transcription factor IIA subunit 1		Gap-filling DNA repair synthesis and ligation in GG-NER	25	2	4.81	0.017	14.7
PIK3CB	175	2.81949	0	0	0	N	0	0	0	N	N	N	0	0	phosphatidylinositol-4,5-bisphosphate 3-kinase catalytic subunit beta		Glycogen metabolism	25	2	4.81	0.017	14.7
																	G beta:gamma signalling through PI3Kgamma	25	2	4.81	0.017	14.7
																	Inactivation of CSF3 (G-CSF) signaling	25	2	4.81	0.017	14.7
																	Signaling by Erythropoietin	25	2	4.81	0.017	14.7
																	Amyloid fiber formation	52	4	6.65	0.0012	14.4
																	Senescence-Associated Secretory Phenotype (SASP)	52	4	6.65	0.0012	14.4
																	Intrinsic Pathway for Apoptosis	53	4	6.58	0.0013	14.1
																	Downregulation of TGF-beta receptor signaling	26	2	4.7	0.018	14.1
																	N-glycan antennae elongation in the medial/trans-Golgi	26	2	4.7	0.018	14.1
																	Pyroptosis	26	2	4.7	0.018	14.1
																	RET signaling	40	3	5.67	0.0055	13.9
																	RHOU GTPase cycle	40	3	5.67	0.0055	13.9
																	Downstream signaling of activated FGFR4	27	2	4.6	0.019	13.6
																	G0 and Early G1	27	2	4.6	0.019	13.6
																	Integrin signaling	27	2	4.6	0.019	13.6
																	Signaling by ALK	27	2	4.6	0.019	13.6
																	Deactivation of the beta-catenin transactivating complex	41	3	5.59	0.0056	13.5
																	MET promotes cell motility	41	3	5.59	0.0056	13.5
																	GPCR ligand binding	450	26	14.5	1.4e-16	13.4
																	Golgi Associated Vesicle Biogenesis	56	4	6.37	0.0015	13.3
																	Signaling by FGFR2	72	5	7	0.00045	13
																	Budding and maturation of HIV virion	28	2	4.5	0.02	13
																	DNA Damage/Telomere Stress Induced Senescence	28	2	4.5	0.02	13
																	Signaling by FGFR	88	6	7.59	0.00012	12.9
																	Regulated Necrosis	58	4	6.24	0.0017	12.8
																	GABA B receptor activation	43	3	5.44	0.0061	12.8
																	Negative regulation of MAPK pathway	43	3	5.44	0.0061	12.8
																	Vasopressin regulates renal water homeostasis via Aquaporins	43	3	5.44	0.0061	12.8
																	Cargo recognition for clathrin-mediated endocytosis	105	7	8.1	3.4e-05	12.7
																	PI3K/AKT Signaling in Cancer	105	7	8.1	3.4e-05	12.7
																	Downstream signal transduction	29	2	4.41	0.021	12.6
																	FOXO-mediated transcription of oxidative stress, metabolic and neuronal genes	29	2	4.41	0.021	12.6
																	Extra-nuclear estrogen signaling	75	5	6.84	0.00053	12.5
																	Diseases of programmed cell death	44	3	5.36	0.0063	12.5
																	DNA Double Strand Break Response	44	3	5.36	0.0063	12.5
																	G2/M DNA damage checkpoint	60	4	6.11	0.0018	12.3
																	Activation of kainate receptors upon glutamate binding	30	2	4.32	0.022	12.1
																	Downstream signaling of activated FGFR2	30	2	4.32	0.022	12.1
																	Recognition of DNA damage by PCNA-containing replication complex	30	2	4.32	0.022	12.1
																	Synthesis of active ubiquitin: roles of E1 and E2 enzymes	30	2	4.32	0.022	12.1
																	The role of GTSE1 in G2/M progression after G2 checkpoint	78	5	6.68	0.00061	11.9
																	RAB geranylgeranylation	62	4	5.99	0.002	11.9
																	Signaling by MET	79	5	6.63	0.00063	11.8
																	Negative regulation of the PI3K/AKT network	113	7	7.75	5e-05	11.7
																	HIV Transcription Initiation	47	3	5.15	0.0073	11.7
																	Activated NOTCH1 Transmits Signal to the Nucleus	31	2	4.23	0.023	11.7
																	Downregulation of SMAD2/3:SMAD4 transcriptional activity	31	2	4.23	0.023	11.7
																	Downstream signaling of activated FGFR1	31	2	4.23	0.023	11.7
																	Endosomal Sorting Complex Required For Transport (ESCRT)	31	2	4.23	0.023	11.7
																	RUNX2 regulates bone development	31	2	4.23	0.023	11.7
																	G2/M Checkpoints	133	8	8.14	1.8e-05	11.5
																	Interleukin-3, Interleukin-5 and GM-CSF signaling	48	3	5.09	0.0076	11.4
																	G-protein beta:gamma signalling	32	2	4.15	0.024	11.3
																	RIPK1-mediated regulated necrosis	32	2	4.15	0.024	11.3
																	Termination of translesion DNA synthesis	32	2	4.15	0.024	11.3
																	Gap junction trafficking and regulation	49	3	5.03	0.0077	11.2
																	TP53 Regulates Transcription of Cell Cycle Genes	49	3	5.03	0.0077	11.2
																	Signaling by GPCR	683	31	13.6	5.3e-17	11
																	Class A/1 (Rhodopsin-like receptors)	320	17	11.1	4.1e-10	11
																	G1/S DNA Damage Checkpoints	67	4	5.72	0.0025	11
																	CD28 co-stimulation	33	2	4.08	0.025	10.9
																	Diseases of carbohydrate metabolism	33	2	4.08	0.025	10.9
																	RAF activation	33	2	4.08	0.025	10.9
																	Signaling by NOTCH2	33	2	4.08	0.025	10.9
																	TNFR1-induced NF-kappa-B signaling pathway	33	2	4.08	0.025	10.9
																	Anti-inflammatory response favouring Leishmania parasite infection	86	5	6.29	0.00089	10.8
																	Aquaporin-mediated transport	51	3	4.91	0.0082	10.7
																	EPH-ephrin mediated repulsion of cells	51	3	4.91	0.0082	10.7
																	Late endosomal microautophagy	34	2	4	0.026	10.6
																	Negative regulators of DDX58/IFIH1 signaling	34	2	4	0.026	10.6
																	RHO GTPases activate PKNs	34	2	4	0.026	10.6
																	APC/C-mediated degradation of cell cycle proteins	88	5	6.21	0.00095	10.5
																	Integration of energy metabolism	108	6	6.71	0.00031	10.3
																	Inwardly rectifying K+ channels	35	2	3.93	0.027	10.3
																	SARS-CoV-1 modulates host translation machinery	35	2	3.93	0.027	10.3
																	Opioid Signalling	90	5	6.12	0.001	10.2
																	Regulation of TP53 Activity through Phosphorylation	92	5	6.04	0.0011	10
																	SARS-CoV-1-host interactions	92	5	6.04	0.0011	10
																	NOD1/2 Signaling Pathway	36	2	3.87	0.029	9.96
																	SMAD2/SMAD3:SMAD4 heterotrimer regulates transcription	36	2	3.87	0.029	9.96
																	Regulation of RUNX3 expression and activity	55	3	4.68	0.0096	9.86
																	Signaling by NTRKs	134	7	6.98	0.00013	9.78
																	Nucleotide-binding domain, leucine rich repeat containing receptor (NLR) signaling pathways	56	3	4.63	0.0099	9.68
																	Stabilization of p53	56	3	4.63	0.0099	9.68
																	Signaling by FGFR1 in disease	37	2	3.8	0.03	9.68
																	Transcriptional regulation by RUNX3	95	5	5.92	0.0012	9.67
																	TNF signaling	57	3	4.58	0.01	9.5
																	Translation of SARS-CoV-2 Structural Proteins	57	3	4.58	0.01	9.5
																	Amine ligand-binding receptors	38	2	3.74	0.031	9.41
																	Diseases of mitotic cell cycle	38	2	3.74	0.031	9.41
																	DNA Damage Recognition in GG-NER	38	2	3.74	0.031	9.41
																	SARS-CoV-1 activates/modulates innate immune responses	38	2	3.74	0.031	9.41
																	Fanconi Anemia Pathway	39	2	3.68	0.032	9.16
																	Platelet Aggregation (Plug Formation)	39	2	3.68	0.032	9.16
																	Transcriptional Regulation by VENTX	39	2	3.68	0.032	9.16
																	Translesion synthesis by Y family DNA polymerases bypasses lesions on DNA template	39	2	3.68	0.032	9.16
																	GABA receptor activation	60	3	4.43	0.011	9
																	SCF(Skp2)-mediated degradation of p27/p21	60	3	4.43	0.011	9
																	MAP2K and MAPK activation	40	2	3.62	0.033	8.91
																	Apoptosis	171	8	6.96	7.8e-05	8.79
																	Cytosolic sensors of pathogen-associated DNA	62	3	4.34	0.012	8.69
																	Dual Incision in GG-NER	41	2	3.56	0.035	8.68
																	TP53 Regulates Metabolic Genes	84	4	4.97	0.0051	8.62
																	Processing of DNA double-strand break ends	63	3	4.3	0.013	8.54
																	Selenoamino acid metabolism	107	5	5.49	0.0018	8.53
																	Regulation of PLK1 Activity at G2/M Transition	86	4	4.89	0.0055	8.41
																	Oxidative Stress Induced Senescence	64	3	4.25	0.013	8.4
																	Signaling by BRAF and RAF1 fusions	64	3	4.25	0.013	8.4
																	FOXO-mediated transcription	65	3	4.21	0.013	8.27
																	Aggrephagy	43	2	3.45	0.038	8.26
																	E3 ubiquitin ligases ubiquitinate target proteins	43	2	3.45	0.038	8.26
																	Formation of Incision Complex in GG-NER	43	2	3.45	0.038	8.26
																	Signaling by FGFR2 in disease	43	2	3.45	0.038	8.26
																	Signaling by SCF-KIT	43	2	3.45	0.038	8.26
																	SUMOylation of transcription cofactors	43	2	3.45	0.038	8.26
																	ESR-mediated signaling	161	7	6.21	0.00034	8.06
																	Signaling by moderate kinase activity BRAF mutants	44	2	3.4	0.039	8.06
																	SARS-CoV-1 Infection	137	6	5.77	0.00092	8.04
																	Late SARS-CoV-2 Infection Events	68	3	4.09	0.015	7.89
																	PCP/CE pathway	92	4	4.68	0.0062	7.84
																	Switching of origins to a post-replicative state	92	4	4.68	0.0062	7.84
																	Negative epigenetic regulation of rRNA expression	46	2	3.31	0.042	7.7
																	RUNX1 regulates transcription of genes involved in differentiation of HSCs	70	3	4.01	0.016	7.65
																	Transcription of the HIV genome	70	3	4.01	0.016	7.65
																	Leishmania infection	171	7	5.96	0.00047	7.56
																	Transcriptional regulation by RUNX2	120	5	5.09	0.0027	7.56
																	Orc1 removal from chromatin	71	3	3.98	0.016	7.54
																	Beta-catenin independent WNT signaling	146	6	5.53	0.0012	7.52
																	TGF-beta receptor signaling activates SMADs	47	2	3.26	0.043	7.52
																	Protein folding	96	4	4.55	0.0069	7.49
																	DNA Damage Bypass	48	2	3.21	0.044	7.36
																	IRS-mediated signalling	48	2	3.21	0.044	7.36
																	NOTCH1 Intracellular Domain Regulates Transcription	48	2	3.21	0.044	7.36
																	Recycling pathway of L1	48	2	3.21	0.044	7.36
																	Programmed Cell Death	203	8	6.22	0.00023	7.33
																	APC/C:Cdh1 mediated degradation of Cdc20 and other APC/C:Cdh1 targeted proteins in late mitosis/early G1	74	3	3.87	0.017	7.22
																	Cell death signalling via NRAGE, NRIF and NADE	74	3	3.87	0.017	7.22
																	SARS-CoV-2 modulates host translation machinery	49	2	3.17	0.046	7.2
																	DNA Replication Pre-Initiation	100	4	4.43	0.0076	7.18
																	PKR-mediated signaling	75	3	3.83	0.018	7.12
																	Plasma lipoprotein assembly, remodeling, and clearance	75	3	3.83	0.018	7.12
																	RNA polymerase II transcribes snRNA genes	75	3	3.83	0.018	7.12
																	Cellular Senescence	129	5	4.85	0.0037	7.01
																	Transcriptional activity of SMAD2/SMAD3:SMAD4 heterotrimer	51	2	3.09	0.049	6.91
																	G alpha (q) signalling events	215	8	5.98	0.0003	6.9
																	Regulation of TP53 Activity	159	6	5.22	0.0016	6.88
																	Toll Like Receptor 9 (TLR9) Cascade	106	4	4.26	0.0087	6.75
																	Oncogenic MAPK signaling	80	3	3.67	0.02	6.65
																	RNA Polymerase II Pre-transcription Events	80	3	3.67	0.02	6.65
																	Membrane Trafficking	624	20	8.62	2.8e-08	6.64
																	MyD88-independent TLR4 cascade	108	4	4.2	0.009	6.62
																	DDX58/IFIH1-mediated induction of interferon-alpha/beta	81	3	3.64	0.021	6.57
																	Selective autophagy	81	3	3.64	0.021	6.57
																	Cell Cycle Checkpoints	256	9	6.11	0.00018	6.56
																	Mitotic G2-G2/M phases	198	7	5.4	0.00095	6.48
																	Metabolism of amino acids and derivatives	356	12	6.86	1.9e-05	6.46
																	Platelet homeostasis	83	3	3.58	0.022	6.4
																	Degradation of beta-catenin by the destruction complex	84	3	3.55	0.022	6.32
																	Interleukin-1 signaling	114	4	4.05	0.01	6.26
																	Cyclin A:Cdk2-associated events at S phase entry	85	3	3.52	0.023	6.24
																	Toll Like Receptor TLR1:TLR2 Cascade	115	4	4.02	0.011	6.2
																	Transcriptional regulation by RUNX1	177	6	4.85	0.0025	6.15
																	Vesicle-mediated transport	671	20	8.18	7.9e-08	6.14
																	Intracellular signaling by second messengers	308	10	6.09	0.00013	6.09
																	Regulation of mRNA stability by proteins that bind AU-rich elements	87	3	3.46	0.024	6.09
																	Antiviral mechanism by IFN-stimulated genes	148	5	4.41	0.0057	6.07
																	HIV Life Cycle	148	5	4.41	0.0057	6.07
																	Signaling by Receptor Tyrosine Kinases	523	16	7.42	1.6e-06	6.06
																	Mitotic G1 phase and G1/S transition	149	5	4.39	0.0058	6.03
																	Synthesis of DNA	121	4	3.88	0.012	5.88
																	MAPK6/MAPK4 signaling	90	3	3.38	0.025	5.88
																	Diseases of signal transduction by growth factor receptors and second messengers	428	13	6.64	2e-05	5.84
																	MAPK family signaling cascades	321	10	5.91	0.00018	5.83
																	Influenza Infection	154	5	4.29	0.0063	5.82
																	EPH-Ephrin signaling	92	3	3.32	0.026	5.75
																	Eukaryotic Translation Elongation	92	3	3.32	0.026	5.75
																	p75 NTR receptor-mediated signalling	95	3	3.25	0.029	5.56
																	DNA Replication	128	4	3.73	0.014	5.55
																	SARS-CoV-2-host interactions	198	6	4.47	0.004	5.47
																	Signaling by Nuclear Receptors	236	7	4.76	0.0021	5.39
																	G alpha (i) signalling events	310	9	5.32	0.00059	5.37
																	DNA Double-Strand Break Repair	134	4	3.6	0.016	5.29
																	CLEC7A (Dectin-1) signaling	100	3	3.13	0.032	5.27
																	Response of EIF2AK4 (GCN2) to amino acid deficiency	100	3	3.13	0.032	5.27
																	Signaling by NOTCH	176	5	3.88	0.0091	5.07
																	Homology Directed Repair	104	3	3.04	0.034	5.06
																	Platelet activation, signaling and aggregation	258	7	4.45	0.0032	4.91
																	Infectious disease	898	21	6.96	1.3e-06	4.78
																	SRP-dependent cotranslational protein targeting to membrane	111	3	2.89	0.04	4.73
																	Signaling by WNT	268	7	4.32	0.0038	4.72
																	Interleukin-1 family signaling	151	4	3.29	0.021	4.67
																	Hedgehog 'off' state	113	3	2.85	0.041	4.65
																	Death Receptor Signaling	152	4	3.27	0.021	4.64
																	Nonsense-Mediated Decay (NMD)	114	3	2.83	0.042	4.61
																	Transcriptional Regulation by TP53	359	9	4.75	0.0013	4.6
																	Factors involved in megakaryocyte development and platelet production	154	4	3.24	0.022	4.58
																	Gastrulation	115	3	2.81	0.043	4.56
																	Eukaryotic Translation Initiation	118	3	2.75	0.045	4.44
																	Signaling by the B Cell Receptor (BCR)	118	3	2.75	0.045	4.44
																	L1CAM interactions	120	3	2.71	0.046	4.37
																	Neurotransmitter receptors and postsynaptic signal transmission	204	5	3.46	0.014	4.35
																	SARS-CoV-2 Infection	291	7	4.04	0.0056	4.33
																	S Phase	163	4	3.09	0.025	4.32
																	Toll-like Receptor Cascades	165	4	3.06	0.026	4.26
																	RNA Polymerase II Transcription	1284	24	6.16	6.4e-06	3.85
																	HIV Infection	230	5	3.12	0.021	3.84
																	Diseases of metabolism	236	5	3.05	0.022	3.74
																	Hemostasis	608	12	4.49	0.0012	3.67
																	Peptide ligand-binding receptors	198	4	2.61	0.042	3.53
																	Nervous system development	576	11	4.16	0.0024	3.52
																	SARS-CoV Infections	414	8	3.57	0.0082	3.48
																	Viral Infection Pathways	705	13	4.39	0.0013	3.44
																	RHO GTPase Effectors	262	5	2.78	0.03	3.36
																	Cellular response to chemical stress	211	4	2.46	0.049	3.31
																	Interferon Signaling	267	5	2.73	0.032	3.29
																	Transmission across Chemical Synapses	268	5	2.72	0.032	3.28
																	Cell Cycle, Mitotic	497	9	3.56	0.0076	3.27
																	Asparagine N-linked glycosylation	299	5	2.43	0.045	2.93
																	Cell Cycle	628	10	3.3	0.0095	2.88
																	Signaling by Interleukins	459	7	2.62	0.029	2.7
																	Developmental Biology	1156	15	3.2	0.0082	2.4
																	Cytokine Signaling in Immune system	770	10	2.59	0.025	2.32
																	Cellular responses to stimuli	746	9	2.21	0.045	2.13
																	Post-translational protein modification	1348	14	2.19	0.04	1.87

## Sheet: Table S2.4
Table S2.4.1 Top prioritized targets from the integrated Si method for European Adipose																	Table S2.4.2 Pathway enrichment of top 100 genes of European Adipose
Target gene	Priority		Genomic predictors			Seeds	Annotation predictors			Crosstalk	Novelty		Druggability		Description		Pathway	Pathway Size	Overlap Count	Z-score	Adjusted P-value	Odds Ratio
	rank	rating	nGene	cGene	eGene		fGene	pGene	dGene		PCOS drug traget	Approved for other diseases	PDBs	PDBs (with pockets)			Regulation of IFNA/IFNB signaling	26	16	41.2	1.2e-28	329
IRF1	1	5	1	0	4	Y	1	0	0	Y	N	N	0	0	interferon regulatory factor 1		TRAF6 mediated IRF7 activation	29	16	39	1.2e-27	254
C5orf56	2	4.55272	1	1	4	Y	1	0	0	N	N	N	0	0	chromosome 5 open reading frame 56		STAT3 nuclear events downstream of ALK signaling	10	5	20.7	1.3e-08	181
RPS26	3	4.41961	1	1	2	Y	1	0	0	Y	N	Y	15	3	ribosomal protein S26		Interleukin-6 signaling	11	5	19.7	2.1e-08	151
SUOX	4	4.40388	1	1	4	Y	1	0	0	Y	N	N	1	0	sulfite oxidase		Regulation of FOXO transcriptional activity by acetylation	10	4	16.5	1.2e-06	120
EP300	5	4.40137	0	0	0	N	0	0	0	Y	N	N	42	26	E1A binding protein p300		NF-kB is activated and signals survival	13	5	18.1	5.2e-08	114
NFKB1	6	4.37973	0	0	0	N	0	0	0	Y	N	N	7	3	nuclear factor kappa B subunit 1		p75NTR signals via NF-kB	16	6	19.6	2.7e-09	110
HDAC2	7	4.23229	0	0	0	N	0	0	0	Y	N	Y	27	0	histone deacetylase 2		DDX58/IFIH1-mediated induction of interferon-alpha/beta	81	25	36.2	3.6e-35	104
RELA	8	4.20305	0	0	0	N	0	0	0	Y	N	N	5	3	RELA proto-oncogene, NF-kB subunit		Interleukin-27 signaling	11	4	15.7	1.7e-06	103
EGFR	9	4.17458	0	0	0	N	0	0	0	Y	N	Y	252	131	epidermal growth factor receptor		Interferon alpha/beta signaling	77	23	34.1	3.6e-32	96.4
CHD4	10	4.14236	0	0	0	N	0	0	0	Y	N	N	10	2	chromodomain helicase DNA binding protein 4		Degradation of cysteine and homocysteine	15	5	16.8	1.1e-07	91
MDM2	11	4.10513	0	0	0	N	0	0	0	Y	N	N	122	90	MDM2 proto-oncogene		Interleukin-35 Signalling	12	4	15	2.3e-06	90
RAD50	12	4.07803	0	0	4	Y	1	0	0	Y	N	N	1	1	RAD50 double strand break repair protein		Signaling by PDGFRA transmembrane, juxtamembrane and kinase domain mutants	12	4	15	2.3e-06	90
SMARCA4	13	4.07506	0	0	0	N	0	0	0	Y	N	N	12	8	SWI/SNF related, matrix associated, actin dependent regulator of chromatin, subfamily a, member 4		Constitutive Signaling by Ligand-Responsive EGFR Cancer Variants	19	6	17.9	7.8e-09	85.2
HDAC1	14	4.06589	0	0	0	N	0	0	0	Y	N	Y	7	1	histone deacetylase 1		Spry regulation of FGF signaling	16	5	16.3	1.5e-07	82.9
TP53	15	4.06094	0	0	0	N	0	0	0	Y	N	N	170	63	tumor protein p53		Downregulation of ERBB2:ERBB3 signaling	13	4	14.4	3e-06	80.1
JUN	16	4.05185	0	0	0	N	0	0	0	Y	N	N	8	1	Jun proto-oncogene, AP-1 transcription factor subunit		Listeria monocytogenes entry into host cells	20	6	17.4	1e-08	79
STAT1	17	4.04199	0	0	0	N	0	0	0	Y	N	N	6	3	signal transducer and activator of transcription 1		Interleukin-21 signaling	10	3	12.3	6.3e-05	76.4
CYCS	18	4.0227	0	0	0	N	0	0	0	Y	N	N	13	2	cytochrome c, somatic		MAPK3 (ERK1) activation	10	3	12.3	6.3e-05	76.4
STAT3	19	4.0087	0	0	0	N	0	0	0	Y	N	N	4	2	signal transducer and activator of transcription 3		RUNX3 regulates NOTCH signaling	14	4	13.9	4e-06	72.1
ETHE1	20	3.97473	0	0	0	N	0	0	0	Y	N	N	1	0	ETHE1, persulfide dioxygenase		TRAF3-dependent IRF activation pathway	14	4	13.9	4e-06	72.1
FOXP3	21	3.95014	0	0	0	N	0	0	0	Y	N	N	2	1	forkhead box P3		Constitutive Signaling by EGFRvIII	15	4	13.4	5.2e-06	65.6
KEAP1	22	3.94151	0	0	0	N	0	0	0	Y	N	Y	82	16	kelch like ECH associated protein 1		InlB-mediated entry of Listeria monocytogenes into host cell	15	4	13.4	5.2e-06	65.6
RPS27A	23	3.91947	0	0	0	N	0	0	0	Y	N	Y	46	14	ribosomal protein S27a		Signaling by ALK	27	7	17.5	1.7e-09	65.2
ISG15	24	3.91811	0	0	0	N	0	0	0	Y	N	N	15	11	ISG15 ubiquitin-like modifier		Regulation of TP53 Activity through Methylation	19	5	14.9	3.9e-07	65.1
JAK1	25	3.90778	0	0	0	N	0	0	0	Y	N	Y	48	5	Janus kinase 1		Metalloprotease DUBs	20	5	14.5	4.9e-07	60.7
APP	26	3.90714	0	0	0	N	0	0	0	Y	N	Y	96	30	amyloid beta precursor protein		Signaling by KIT in disease	20	5	14.5	4.9e-07	60.7
KPNA2	27	3.87839	0	0	1	Y	1	0	0	Y	N	N	11	5	karyopherin subunit alpha 2		Regulation of gene expression in late stage (branching morphogenesis) pancreatic bud precursor cells	16	4	12.9	6.7e-06	60.1
CDK2	28	3.87541	1	0	0	Y	1	0	0	Y	N	N	428	239	cyclin dependent kinase 2		The NLRP3 inflammasome	16	4	12.9	6.7e-06	60.1
NRF1	29	3.87287	0	0	0	N	0	0	0	Y	N	N	0	0	nuclear respiratory factor 1		TICAM1-dependent activation of IRF3/IRF7	12	3	11.2	0.00011	59.5
GSDMD	30	3.86677	0	0	0	N	0	0	0	Y	N	N	7	7	gasdermin D		Downregulation of ERBB2 signaling	29	7	16.8	2.7e-09	59.3
ERBB3	31	3.83488	1	1	0	Y	1	0	1	Y	N	Y	21	8	erb-b2 receptor tyrosine kinase 3		Inactivation of CSF3 (G-CSF) signaling	25	6	15.5	3.9e-08	58.2
UBA52	32	3.83268	0	0	0	N	0	0	0	Y	N	N	43	19	ubiquitin A-52 residue ribosomal protein fusion product 1		Signaling by EGFR in Cancer	25	6	15.5	3.9e-08	58.2
IFNA10	33	3.83211	0	0	0	N	0	0	0	Y	N	N	0	0	interferon alpha 10		ZBP1(DAI) mediated induction of type I IFNs	21	5	14.1	6.4e-07	57
IKZF4	34	3.82892	1	1	1	Y	1	0	1	N	N	N	1	0	IKAROS family zinc finger 4		Signaling by CSF3 (G-CSF)	30	7	16.5	3.4e-09	56.7
NPVF	35	3.81109	0	0	0	N	0	0	0	N	N	N	0	0	neuropeptide VF precursor		SARS-CoV-2 activates/modulates innate and adaptive immune responses	123	24	27.9	7e-29	55.7
RAB5B	36	3.80908	1	0	3	Y	1	0	0	Y	N	N	1	0	RAB5B, member RAS oncogene family		RIP-mediated NFkB activation via ZBP1	17	4	12.5	8.6e-06	55.5
ELAVL1	37	3.80679	0	0	0	N	0	0	0	Y	N	N	10	1	ELAV like RNA binding protein 1		Signaling by CSF1 (M-CSF) in myeloid cells	31	7	16.2	4.1e-09	54.3
REL	38	3.78914	0	0	0	N	0	0	0	Y	N	N	0	0	REL proto-oncogene, NF-kB subunit		p75NTR recruits signalling complexes	13	3	10.7	0.00013	53.5
IFNA7	39	3.78798	0	0	0	N	0	0	0	Y	N	N	0	0	interferon alpha 7		TRAF6 mediated IRF7 activation in TLR7/8 or 9 signaling	13	3	10.7	0.00013	53.5
CDK1	40	3.78454	0	0	0	N	0	0	0	Y	N	N	11	6	cyclin dependent kinase 1		Zygotic genome activation (ZGA)	13	3	10.7	0.00013	53.5
CYB5R2	41	3.78409	0	0	0	N	0	0	0	Y	N	N	0	0	cytochrome b5 reductase 2		AKT phosphorylates targets in the cytosol	14	3	10.3	0.00016	48.7
AR	42	3.77617	0	0	0	N	0	0	0	Y	P2	Y	80	80	androgen receptor		Interleukin-15 signaling	14	3	10.3	0.00016	48.7
IFNA21	43	3.76866	0	0	0	N	0	0	0	Y	N	N	0	0	interferon alpha 21		Regulation of IFNG signaling	14	3	10.3	0.00016	48.7
PAPSS2	44	3.7573	0	0	0	N	0	0	0	N	N	N	3	0	3'-phosphoadenosine 5'-phosphosulfate synthase 2		Regulation of innate immune responses to cytosolic DNA	14	3	10.3	0.00016	48.7
DNMT3B	45	3.75681	1	0	2	Y	1	0	0	N	N	N	26	7	DNA methyltransferase 3 beta		TP53 Regulates Transcription of Genes Involved in G1 Cell Cycle Arrest	14	3	10.3	0.00016	48.7
FOS	46	3.75363	0	0	0	N	0	0	0	N	N	N	3	0	Fos proto-oncogene, AP-1 transcription factor subunit		Regulation of TP53 Activity through Acetylation	29	6	14.4	9.5e-08	48.1
IFNA16	47	3.72294	0	0	0	N	0	0	0	N	N	N	0	0	interferon alpha 16		Interleukin-6 family signaling	24	5	13.2	1.2e-06	48
CREBBP	48	3.71795	0	0	0	N	0	0	0	N	N	N	115	75	CREB binding protein		Transcriptional regulation of granulopoiesis	30	6	14.1	1.1e-07	46.1
MAPRE1	49	3.71626	1	0	1	Y	1	0	1	N	N	N	30	8	microtubule associated protein RP/EB family member 1		Senescence-Associated Secretory Phenotype (SASP)	52	10	17.8	7.1e-12	45.9
CTNNB1	50	3.71602	0	0	0	N	0	0	0	N	N	N	20	13	catenin beta 1		NOTCH3 Intracellular Domain Regulates Transcription	25	5	12.9	1.4e-06	45.5
IFNA4	51	3.7087	0	0	0	N	0	0	0	N	N	N	0	0	interferon alpha 4		NOTCH4 Intracellular Domain Regulates Transcription	20	4	11.5	1.6e-05	45.1
HSP90AA1	52	3.70308	0	0	0	N	0	0	0	N	N	N	305	184	heat shock protein 90 alpha family class A member 1		Signaling by PDGFR in disease	20	4	11.5	1.6e-05	45.1
KAT2A	53	3.70266	0	0	0	N	0	0	0	N	N	N	9	5	lysine acetyltransferase 2A		Negative regulation of FLT3	15	3	9.97	0.0002	44.6
SPI1	54	3.70212	0	0	0	N	0	0	0	N	N	N	0	0	Spi-1 proto-oncogene		Formation of the beta-catenin:TCF transactivating complex	31	6	13.9	1.4e-07	44.2
IFNA14	55	3.68672	0	0	0	N	0	0	0	N	N	N	0	0	interferon alpha 14		Activation of the AP-1 family of transcription factors	10	2	8.14	0.0026	44.1
GATA4	56	3.68207	1	0	0	Y	1	1	1	N	N	N	1	0	GATA binding protein 4		eNOS activation	10	2	8.14	0.0026	44.1
SQOR	57	3.6813	0	0	0	N	0	0	0	N	N	N	7	7	sulfide quinone oxidoreductase		IRAK2 mediated activation of TAK1 complex	10	2	8.14	0.0026	44.1
TST	58	3.68031	0	0	0	N	0	0	0	N	N	N	0	0	thiosulfate sulfurtransferase		Tetrahydrobiopterin (BH4) synthesis, recycling, salvage and regulation	10	2	8.14	0.0026	44.1
IFNA6	59	3.67342	0	0	0	N	0	0	0	N	N	N	0	0	interferon alpha 6		NOTCH1 Intracellular Domain Regulates Transcription	48	9	16.7	1.2e-10	43.9
SIN3A	60	3.67265	0	0	0	N	0	0	0	N	N	N	0	0	SIN3 transcription regulator family member A		Regulation of TP53 Expression and Degradation	37	7	14.8	1.3e-08	43.5
MPST	61	3.66894	0	0	0	N	0	0	0	N	N	N	2	1	mercaptopyruvate sulfurtransferase		Interleukin-20 family signaling	26	5	12.6	1.7e-06	43.4
IFNA5	62	3.66495	0	0	0	N	0	0	0	N	N	N	0	0	interferon alpha 5		Purinergic signaling in leishmaniasis infection	26	5	12.6	1.7e-06	43.4
BRCA1	63	3.66044	0	0	0	N	0	0	0	N	N	N	29	11	BRCA1, DNA repair associated		CD209 (DC-SIGN) signaling	21	4	11.2	1.9e-05	42.4
IFNA17	64	3.64885	0	0	0	N	0	0	0	N	N	N	0	0	interferon alpha 17		Inflammasomes	21	4	11.2	1.9e-05	42.4
BIRC3	65	3.64707	0	0	0	N	0	0	0	N	N	N	6	0	baculoviral IAP repeat containing 3		Negative regulation of MET activity	21	4	11.2	1.9e-05	42.4
STAT2	66	3.64143	0	0	0	N	0	0	0	N	N	N	3	2	signal transducer and activator of transcription 2		SARS-CoV-1 activates/modulates innate immune responses	38	7	14.6	1.6e-08	42.1
RSAD2	67	3.6394	0	0	0	N	0	0	0	N	N	N	0	0	radical S-adenosyl methionine domain containing 2		Signaling by ERBB2	50	9	16.3	1.7e-10	41.8
SIRT1	68	3.63874	0	0	0	N	0	0	0	N	N	N	8	1	sirtuin 1		ERCC6 (CSB) and EHMT2 (G9a) positively regulate rRNA expression	16	3	9.63	0.00024	41.2
MYC	69	3.6344	0	0	0	N	0	0	0	N	N	N	10	4	MYC proto-oncogene, bHLH transcription factor		MAP3K8 (TPL2)-dependent MAPK1/3 activation	16	3	9.63	0.00024	41.2
JAK2	70	3.62778	0	0	0	N	0	0	0	N	N	Y	128	40	Janus kinase 2		PI3K events in ERBB2 signaling	16	3	9.63	0.00024	41.2
STUB1	71	3.62318	0	0	0	N	0	0	0	N	N	N	3	1	STIP1 homology and U-box containing protein 1		Regulation of KIT signaling	16	3	9.63	0.00024	41.2
NPM1	72	3.61527	0	0	0	N	0	0	0	N	N	Y	4	2	nucleophosmin		Signaling by ERBB2 ECD mutants	16	3	9.63	0.00024	41.2
H3C13	73	3.6128	0	0	0	N	0	0	0	N	N	N	20	6	NA		Chaperone Mediated Autophagy	22	4	10.9	2.2e-05	40.1
FAU	74	3.6111	0	0	0	N	0	0	0	N	N	Y	0	0	FAU, ubiquitin like and ribosomal protein S30 fusion		Regulation of signaling by CBL	22	4	10.9	2.2e-05	40.1
CDKN1B	75	3.61106	0	0	0	N	0	0	0	N	N	N	9	6	cyclin dependent kinase inhibitor 1B		SARS-CoV-2-host interactions	198	28	25.4	9.7e-30	39.9
KRR1	76	3.60944	1	0	2	Y	1	0	0	N	N	N	0	0	KRR1, small subunit processome component homolog		Notch-HLH transcription pathway	28	5	12.1	2.3e-06	39.6
IRF9	77	3.60919	0	0	0	N	0	0	0	N	N	N	0	0	interferon regulatory factor 9		Sulfur amino acid metabolism	28	5	12.1	2.3e-06	39.6
H3C12	78	3.60848	0	0	0	N	0	0	0	N	N	N	0	0	NA		Alpha-protein kinase 1 signaling pathway	11	2	7.74	0.003	39.3
IFNB1	79	3.60501	0	0	0	N	0	0	0	N	N	N	1	1	interferon beta 1		Constitutive Signaling by Overexpressed ERBB2	11	2	7.74	0.003	39.3
KAT2B	80	3.59292	0	0	0	N	0	0	0	N	N	N	25	16	lysine acetyltransferase 2B		NFE2L2 regulating tumorigenic genes	11	2	7.74	0.003	39.3
SRC	81	3.58907	0	0	0	N	0	0	0	N	N	Y	62	14	SRC proto-oncogene, non-receptor tyrosine kinase		Pexophagy	11	2	7.74	0.003	39.3
YWHAE	82	3.58749	0	0	0	N	0	0	0	N	N	N	5	0	tyrosine 3-monooxygenase/tryptophan 5-monooxygenase activation protein epsilon		Regulated proteolysis of p75NTR	11	2	7.74	0.003	39.3
QARS1	83	3.58272	0	0	0	N	0	0	0	N	N	N	4	3	NA		Regulation of BACH1 activity	11	2	7.74	0.003	39.3
IRF3	84	3.57975	0	0	0	N	0	0	0	N	N	N	18	9	interferon regulatory factor 3		Regulation of gene expression by Hypoxia-inducible Factor	11	2	7.74	0.003	39.3
IFNA1	85	3.57878	0	0	0	N	0	0	0	N	N	N	0	0	interferon alpha 1		Signaling by Leptin	11	2	7.74	0.003	39.3
CBL	86	3.57874	0	0	0	N	0	0	0	N	N	N	31	17	Cbl proto-oncogene		TICAM1,TRAF6-dependent induction of TAK1 complex	11	2	7.74	0.003	39.3
PAPSS1	87	3.57456	0	0	0	N	0	0	0	N	N	N	8	1	3'-phosphoadenosine 5'-phosphosulfate synthase 1		Activation of IRF3, IRF7 mediated by TBK1, IKBKE	17	3	9.33	0.00029	38.3
GPHN	88	3.57454	0	0	0	N	0	0	0	N	N	N	1	0	gephyrin		GAB1 signalosome	17	3	9.33	0.00029	38.3
EZH2	89	3.57293	0	0	0	N	0	0	0	N	N	Y	25	0	enhancer of zeste 2 polycomb repressive complex 2 subunit		Signaling by cytosolic FGFR1 fusion mutants	17	3	9.33	0.00029	38.3
MYD88	90	3.57212	0	0	0	N	0	0	0	N	N	N	9	6	myeloid differentiation primary response 88		Signaling by PTK6	54	9	15.7	3.1e-10	38
NFKBIA	91	3.56959	0	0	0	N	0	0	0	N	N	N	3	1	NFKB inhibitor alpha		Downstream signal transduction	29	5	11.9	2.6e-06	38
IFNA8	92	3.56715	0	0	0	N	0	0	0	N	N	N	1	1	interferon alpha 8		Negative regulation of FGFR3 signaling	29	5	11.9	2.6e-06	38
H3C1	93	3.55492	0	0	0	N	0	0	0	N	N	N	0	0	NA		Cytosolic sensors of pathogen-associated DNA	62	10	16.3	4.1e-11	37
IFNA2	94	3.55213	0	0	0	N	0	0	0	N	N	N	10	6	interferon alpha 2		Signaling by NOTCH3	49	8	14.6	3.6e-09	36.7
AKT1	95	3.54919	0	0	0	N	0	0	0	N	N	N	35	7	AKT serine/threonine kinase 1		Estrogen-dependent nuclear events downstream of ESR-membrane signaling	24	4	10.4	3.1e-05	36.1
COMMD7	96	3.54525	1	0	4	Y	0	0	0	N	N	N	0	0	COMM domain containing 7		TRAF6 mediated NF-kB activation	24	4	10.4	3.1e-05	36.1
PDGFRA	97	3.53911	0	0	0	N	0	0	0	N	N	Y	9	7	platelet derived growth factor receptor alpha		MECP2 regulates neuronal receptors and channels	18	3	9.05	0.00033	35.7
GRB2	98	3.53859	0	0	0	N	0	0	0	N	N	N	54	27	growth factor receptor bound protein 2		Regulation of NF-kappa B signaling	18	3	9.05	0.00033	35.7
CEBPB	99	3.53002	0	0	0	N	0	0	0	N	N	N	14	0	CCAAT/enhancer binding protein beta		TP53 Regulates Transcription of Genes Involved in G2 Cell Cycle Arrest	18	3	9.05	0.00033	35.7
HSP90AB1	100	3.52981	0	0	0	N	0	0	0	N	N	N	13	5	heat shock protein 90 alpha family class B member 1		TAK1-dependent IKK and NF-kappa-B activation	44	7	13.5	4.1e-08	35.3
PDGFRB	101	3.52772	0	0	0	N	0	0	0	N	N	Y	2	1	platelet derived growth factor receptor beta		Activation of the TFAP2 (AP-2) family of transcription factors	12	2	7.39	0.0035	35.3
IL4	102	3.52532	0	0	0	N	0	0	0	N	N	N	26	5	interleukin 4		Josephin domain DUBs	12	2	7.39	0.0035	35.3
IRF2	103	3.5196	0	0	0	N	0	0	0	N	N	N	0	0	interferon regulatory factor 2		SARS-CoV-2 targets host intracellular signalling and regulatory pathways	12	2	7.39	0.0035	35.3
H3-3B	104	3.51382	0	0	0	N	0	0	0	N	N	N	40	16	NA		SUMOylation of immune response proteins	12	2	7.39	0.0035	35.3
CCL2	105	3.51272	0	0	0	N	0	0	0	N	N	N	12	1	C-C motif chemokine ligand 2		EGFR downregulation	31	5	11.5	3.6e-06	35.1
RPS7	106	3.50982	0	0	0	N	0	0	0	N	N	Y	26	7	ribosomal protein S7		Negative regulation of FGFR4 signaling	31	5	11.5	3.6e-06	35.1
ESR1	107	3.50534	0	0	0	N	0	0	0	N	P4	N	307	291	estrogen receptor 1		Regulated Necrosis	58	9	15.1	5.5e-10	35
YAP1	108	3.50262	1	0	0	Y	1	0	0	N	N	N	27	17	Yes associated protein 1		Signaling by NOTCH1 PEST Domain Mutants in Cancer	58	9	15.1	5.5e-10	35
CUL3	109	3.50092	0	0	0	N	0	0	0	N	N	N	6	4	cullin 3		Factors involved in megakaryocyte development and platelet production	154	21	21.6	8.2e-22	34.7
ERBB2	110	3.49896	0	0	0	N	0	0	0	N	N	Y	31	14	erb-b2 receptor tyrosine kinase 2		FLT3 Signaling	38	6	12.4	4.5e-07	34.6
IRF8	111	3.4907	0	0	0	N	0	0	0	N	N	N	0	0	interferon regulatory factor 8		Defective Intrinsic Pathway for Apoptosis	25	4	10.2	3.7e-05	34.4
EED	112	3.48531	0	0	0	N	0	0	0	N	N	N	64	2	embryonic ectoderm development		RIPK1-mediated regulated necrosis	32	5	11.3	4.1e-06	33.8
STAT6	113	3.48162	0	0	0	N	0	0	0	N	N	N	5	2	signal transducer and activator of transcription 6		Nuclear events stimulated by ALK signaling in cancer	19	3	8.79	0.00039	33.5
PRDM1	114	3.47979	0	0	0	N	0	0	0	N	N	N	1	1	PR/SET domain 1		TICAM1, RIP1-mediated IKK complex recruitment	19	3	8.79	0.00039	33.5
CD74	115	3.4752	0	0	0	N	0	0	0	N	N	N	5	1	CD74 molecule		Pyroptosis	26	4	10	4.2e-05	32.8
DENND1A	116	3.47366	1	0	3	Y	1	0	0	N	N	N	1	1	DENN domain containing 1A		Signaling by ERBB2 in Cancer	26	4	10	4.2e-05	32.8
XAF1	117	3.4718	0	0	0	N	0	0	0	N	N	N	1	0	XIAP associated factor 1		Negative regulation of FGFR1 signaling	33	5	11.1	4.7e-06	32.6
TRAF6	118	3.47154	0	0	0	N	0	0	0	N	N	N	12	1	TNF receptor associated factor 6		Chk1/Chk2(Cds1) mediated inactivation of Cyclin B:Cdk1 complex	13	2	7.08	0.0041	32.1
RUNX1	119	3.47007	0	0	0	N	0	0	0	N	N	N	5	3	runt related transcription factor 1		ERBB2 Activates PTK6 Signaling	13	2	7.08	0.0041	32.1
TRIM28	120	3.4618	0	0	0	N	0	0	0	N	N	N	7	4	tripartite motif containing 28		Loss of function of MECP2 in Rett syndrome	13	2	7.08	0.0041	32.1
CDH1	121	3.45608	0	0	0	N	0	0	0	N	N	N	15	3	cadherin 1		PRC2 methylates histones and DNA	13	2	7.08	0.0041	32.1
HDAC5	122	3.45469	0	0	0	N	0	0	0	N	N	Y	0	0	histone deacetylase 5		Repression of WNT target genes	13	2	7.08	0.0041	32.1
XRCC6	123	3.4528	0	0	0	N	0	0	0	N	N	N	19	10	X-ray repair cross complementing 6		Suppression of phagosomal maturation	13	2	7.08	0.0041	32.1
JAK3	124	3.44752	0	0	0	N	0	0	0	N	N	Y	38	33	Janus kinase 3		Negative regulation of FGFR2 signaling	34	5	10.9	5.3e-06	31.4
SUMO2	125	3.44017	0	0	0	N	0	0	0	N	N	N	24	7	small ubiquitin-like modifier 2		Attenuation phase	27	4	9.81	4.9e-05	31.4
NEIL2	126	3.43517	1	0	2	Y	1	0	0	N	N	N	0	0	nei like DNA glycosylase 2		G0 and Early G1	27	4	9.81	4.9e-05	31.4
RIGI	127	3.43311	0	0	0	N	0	0	0	N	N	N	28	5	NA		FOXO-mediated transcription	65	9	14.2	1.5e-09	30.6
OASL	128	3.43079	0	0	0	N	0	0	0	N	N	N	2	1	2'-5'-oligoadenylate synthetase like		DNA Damage/Telomere Stress Induced Senescence	28	4	9.62	5.6e-05	30.1
IKBKE	129	3.42869	0	0	0	N	0	0	0	N	N	N	0	0	inhibitor of nuclear factor kappa B kinase subunit epsilon		FLT3 signaling in disease	28	4	9.62	5.6e-05	30.1
DHX9	130	3.41948	0	0	0	N	0	0	0	N	N	N	3	1	DExH-box helicase 9		Positive epigenetic regulation of rRNA expression	43	6	11.6	9.1e-07	29.9
MED1	131	3.41891	0	0	0	N	0	0	0	N	N	N	2	0	mediator complex subunit 1		Signaling by SCF-KIT	43	6	11.6	9.1e-07	29.9
IL6	132	3.41655	0	0	0	N	0	0	0	N	N	Y	11	2	interleukin 6		Interferon Signaling	267	29	22.4	1.1e-27	29.8
GRID2IP	133	3.41365	0	0	0	N	0	0	0	N	N	N	0	0	Grid2 interacting protein		NPAS4 regulates expression of target genes	21	3	8.33	0.00052	29.8
LIG3	134	3.41203	0	0	0	N	0	0	0	N	N	N	8	6	DNA ligase 3		SARS-CoV Infections	414	39	24.1	3.6e-35	29.7
XRCC1	135	3.40958	0	0	0	N	0	0	0	N	N	N	10	5	X-ray repair cross complementing 1		SARS-CoV-1-host interactions	92	12	15.9	3.7e-12	29.5
YWHAB	136	3.40492	0	0	0	N	0	0	0	N	N	N	13	4	tyrosine 3-monooxygenase/tryptophan 5-monooxygenase activation protein beta		Erythropoietin activates RAS	14	2	6.8	0.0046	29.5
CLTC	137	3.4045	0	0	0	N	0	0	0	N	N	N	6	0	clathrin heavy chain		Formation of definitive endoderm	14	2	6.8	0.0046	29.5
PARP1	138	3.40008	0	0	0	N	0	0	0	N	N	Y	87	21	poly(ADP-ribose) polymerase 1		Glycogen synthesis	14	2	6.8	0.0046	29.5
IKZF1	139	3.39508	0	0	0	N	0	0	0	N	N	N	3	0	IKAROS family zinc finger 1		IRAK1 recruits IKK complex	14	2	6.8	0.0046	29.5
IFIT1	140	3.3945	0	0	0	N	0	0	0	N	N	N	8	3	interferon induced protein with tetratricopeptide repeats 1		Metabolism of nitric oxide: NOS3 activation and regulation	14	2	6.8	0.0046	29.5
RAB35	141	3.39437	0	0	0	N	0	0	0	N	N	N	4	3	RAB35, member RAS oncogene family		Physiological factors	14	2	6.8	0.0046	29.5
H2AX	142	3.39205	0	0	0	N	0	0	0	N	N	N	3	0	NA		Regulation of TP53 Activity through Association with Co-factors	14	2	6.8	0.0046	29.5
HDAC7	143	3.39169	0	0	0	N	0	0	0	N	N	Y	5	0	histone deacetylase 7		SHC1 events in EGFR signaling	14	2	6.8	0.0046	29.5
EGF	144	3.39051	0	0	0	N	0	0	0	N	N	N	11	1	epidermal growth factor		YAP1- and WWTR1 (TAZ)-stimulated gene expression	14	2	6.8	0.0046	29.5
H4C6	145	3.38963	0	0	0	N	0	0	0	N	N	N	0	0	NA		SMAD2/SMAD3:SMAD4 heterotrimer regulates transcription	36	5	10.6	7e-06	29.4
PRKACA	146	3.38095	0	0	0	N	0	0	0	N	N	N	43	25	protein kinase cAMP-activated catalytic subunit alpha		Diseases of programmed cell death	44	6	11.5	1e-06	29.1
CD4	147	3.38065	0	0	0	N	0	0	0	N	N	Y	67	32	CD4 molecule		DNA Double Strand Break Response	44	6	11.5	1e-06	29.1
KRAS	148	3.37329	0	0	0	N	0	0	0	N	N	Y	213	42	KRAS proto-oncogene, GTPase		SHC1 events in ERBB2 signaling	22	3	8.12	0.00059	28.2
IFIT3	149	3.3621	0	0	0	N	0	0	0	N	N	N	1	0	interferon induced protein with tetratricopeptide repeats 3		Transcriptional regulation by the AP-2 (TFAP2) family of transcription factors	38	5	10.3	9e-06	27.6
RPL8	150	3.35714	0	0	0	N	0	0	0	N	N	Y	2	2	ribosomal protein L8		Activation of BAD and translocation to mitochondria	15	2	6.55	0.0051	27.2
ZNF576	151	3.35415	0	0	0	N	0	0	0	N	N	N	0	0	zinc finger protein 576		ERBB2 Regulates Cell Motility	15	2	6.55	0.0051	27.2
HDAC4	152	3.35343	0	0	0	N	0	0	0	N	N	Y	14	3	histone deacetylase 4		Glycogen storage diseases	15	2	6.55	0.0051	27.2
IFIH1	153	3.34619	0	0	0	N	0	0	0	N	N	N	8	5	interferon induced with helicase C domain 1		GRB2:SOS provides linkage to MAPK signaling for Integrins	15	2	6.55	0.0051	27.2
ATM	154	3.34612	0	0	0	N	0	0	0	N	N	N	10	1	ATM serine/threonine kinase		Signaling by NOTCH1 HD Domain Mutants in Cancer	15	2	6.55	0.0051	27.2
IRF7	155	3.34533	0	0	0	N	0	0	0	N	N	N	1	1	interferon regulatory factor 7		Signal regulatory protein family interactions	15	2	6.55	0.0051	27.2
HSPA4	156	3.34513	0	0	0	N	0	0	0	N	N	N	0	0	heat shock protein family A (Hsp70) member 4		Cyclin D associated events in G1	47	6	11.1	1.4e-06	27
PPP1CA	157	3.34217	0	0	0	N	0	0	0	N	N	N	36	8	protein phosphatase 1 catalytic subunit alpha		Oxidative Stress Induced Senescence	64	8	12.7	2.5e-08	26.9
RPS3A	158	3.33991	0	0	0	N	0	0	0	N	N	Y	25	7	ribosomal protein S3A		Cellular Senescence	129	15	16.7	2.1e-14	26.8
FYN	159	3.33828	0	0	0	N	0	0	0	N	N	Y	48	7	FYN proto-oncogene, Src family tyrosine kinase		Transcriptional Regulation by VENTX	39	5	10.1	1e-05	26.8
GATA3	160	3.33107	0	0	0	N	0	0	0	N	N	N	3	0	GATA binding protein 3		Diseases of Immune System	31	4	9.1	8.1e-05	26.8
RPGRIP1L	161	3.33072	0	0	0	N	0	0	0	N	N	N	1	1	RPGRIP1 like		Downregulation of SMAD2/3:SMAD4 transcriptional activity	31	4	9.1	8.1e-05	26.8
FN1	162	3.33025	0	0	0	N	0	0	0	N	N	Y	63	13	fibronectin 1		IKK complex recruitment mediated by RIP1	23	3	7.93	0.00067	26.8
TNF	163	3.32906	0	0	0	N	0	0	0	N	N	Y	40	19	tumor necrosis factor		Interleukin-7 signaling	23	3	7.93	0.00067	26.8
RIN1	164	3.32768	0	0	0	N	0	0	0	N	N	N	0	0	Ras and Rab interactor 1		RAF-independent MAPK1/3 activation	23	3	7.93	0.00067	26.8
COMMD1	165	3.32759	0	0	0	N	0	0	0	N	N	N	1	0	copper metabolism domain containing 1		Nucleotide-binding domain, leucine rich repeat containing receptor (NLR) signaling pathways	56	7	11.8	2e-07	26.6
H3-4	166	3.32665	0	0	0	N	0	0	0	N	N	N	1	0	NA		Signaling by NOTCH1	74	9	13.2	4e-09	26.3
CUL1	167	3.32592	0	0	0	N	0	0	0	N	N	N	16	8	cullin 1		Interleukin-3, Interleukin-5 and GM-CSF signaling	48	6	11	1.6e-06	26.3
ERBB4	168	3.32162	1	0	0	Y	1	0	0	N	N	Y	10	4	erb-b2 receptor tyrosine kinase 4		Signaling by FGFR3	40	5	10	1.2e-05	26
SIRT7	169	3.31556	0	0	0	N	0	0	0	N	N	N	1	0	sirtuin 7		Pre-NOTCH Expression and Processing	49	6	10.8	1.7e-06	25.7
SMAD3	170	3.31551	0	0	0	N	0	0	0	N	N	N	9	2	SMAD family member 3		TP53 Regulates Transcription of Cell Cycle Genes	49	6	10.8	1.7e-06	25.7
BCL2	171	3.31355	0	0	0	N	0	0	0	N	N	Y	33	22	BCL2, apoptosis regulator		SARS-CoV-2 Infection	291	28	20.6	3.1e-25	25.6
RAB5A	172	3.31261	0	0	0	N	0	0	0	N	N	N	13	4	RAB5A, member RAS oncogene family		Transcriptional regulation by RUNX3	95	11	14.2	1.2e-10	25.5
ACTB	173	3.31212	0	0	0	N	0	0	0	N	N	N	8	3	actin beta		APC/C:Cdc20 mediated degradation of Cyclin B	24	3	7.74	0.00074	25.5
RPS23	174	3.30659	0	0	0	N	0	0	0	N	N	Y	25	6	ribosomal protein S23		Growth hormone receptor signaling	24	3	7.74	0.00074	25.5
IFIT2	175	3.30252	0	0	0	N	0	0	0	N	N	N	1	0	interferon induced protein with tetratricopeptide repeats 2		Deactivation of the beta-catenin transactivating complex	41	5	9.87	1.3e-05	25.3
																	Signaling by FGFR4	41	5	9.87	1.3e-05	25.3
																	Assembly Of The HIV Virion	16	2	6.32	0.0056	25.3
																	FOXO-mediated transcription of cell death genes	16	2	6.32	0.0056	25.3
																	GRB2 events in ERBB2 signaling	16	2	6.32	0.0056	25.3
																	NRIF signals cell death from the nucleus	16	2	6.32	0.0056	25.3
																	SARS-CoV-1 targets host intracellular signalling and regulatory pathways	16	2	6.32	0.0056	25.3
																	Sema3A PAK dependent Axon repulsion	16	2	6.32	0.0056	25.3
																	TGF-beta receptor signaling in EMT (epithelial to mesenchymal transition)	16	2	6.32	0.0056	25.3
																	TRAF6-mediated induction of TAK1 complex within TLR4 complex	16	2	6.32	0.0056	25.3
																	Transcription of E2F targets under negative control by p107 (RBL1) and p130 (RBL2) in complex with HDAC1	16	2	6.32	0.0056	25.3
																	VLDLR internalisation and degradation	16	2	6.32	0.0056	25.3
																	Signaling by EGFR	50	6	10.7	1.9e-06	25.1
																	Oncogene Induced Senescence	33	4	8.79	0.0001	24.9
																	Transcriptional activity of SMAD2/SMAD3:SMAD4 heterotrimer	51	6	10.6	2.1e-06	24.6
																	Regulation of beta-cell development	42	5	9.74	1.4e-05	24.6
																	Bacterial Infection Pathways	70	8	12.1	4.7e-08	24.3
																	NOTCH3 Activation and Transmission of Signal to the Nucleus	25	3	7.57	0.00083	24.3
																	Estrogen-dependent gene expression	90	10	13.3	1.3e-09	24
																	Negative regulators of DDX58/IFIH1 signaling	34	4	8.65	0.00011	24
																	Intrinsic Pathway for Apoptosis	53	6	10.4	2.5e-06	23.5
																	Aberrant regulation of mitotic G1/S transition in cancer due to RB1 defects	17	2	6.11	0.0062	23.5
																	IL-6-type cytokine receptor ligand interactions	17	2	6.11	0.0062	23.5
																	Signaling by NTRK3 (TRKC)	17	2	6.11	0.0062	23.5
																	Translesion synthesis by POLK	17	2	6.11	0.0062	23.5
																	Interleukin-2 family signaling	44	5	9.49	1.8e-05	23.4
																	RNA Polymerase I Transcription Initiation	44	5	9.49	1.8e-05	23.4
																	Cardiogenesis	26	3	7.41	0.00092	23.3
																	Constitutive Signaling by AKT1 E17K in Cancer	26	3	7.41	0.00092	23.3
																	Downregulation of TGF-beta receptor signaling	26	3	7.41	0.00092	23.3
																	Meiotic recombination	26	3	7.41	0.00092	23.3
																	RUNX1 regulates genes involved in megakaryocyte differentiation and platelet function	36	4	8.38	0.00014	22.5
																	Integrin signaling	27	3	7.26	0.001	22.3
																	Interleukin receptor SHC signaling	27	3	7.26	0.001	22.3
																	VEGFR2 mediated vascular permeability	27	3	7.26	0.001	22.3
																	Negative epigenetic regulation of rRNA expression	46	5	9.26	2.1e-05	22.2
																	MyD88-independent TLR4 cascade	108	11	13.3	4.1e-10	22.1
																	Apoptotic factor-mediated response	18	2	5.92	0.0069	22.1
																	Gastrin-CREB signalling pathway via PKC and MAPK	18	2	5.92	0.0069	22.1
																	RORA activates gene expression	18	2	5.92	0.0069	22.1
																	HSF1-dependent transactivation	37	4	8.26	0.00015	21.9
																	B-WICH complex positively regulates rRNA expression	28	3	7.11	0.0011	21.4
																	Signaling by ERBB4	58	6	9.87	4e-06	21.2
																	RNA Polymerase I Transcription	48	5	9.04	2.5e-05	21.2
																	Ovarian tumor domain proteases	38	4	8.13	0.00017	21.2
																	Metabolism of cofactors	19	2	5.75	0.0075	20.8
																	NFE2L2 regulating anti-oxidant/detoxification enzymes	19	2	5.75	0.0075	20.8
																	Transcription of E2F targets under negative control by DREAM complex	19	2	5.75	0.0075	20.8
																	Translesion Synthesis by POLH	19	2	5.75	0.0075	20.8
																	FOXO-mediated transcription of oxidative stress, metabolic and neuronal genes	29	3	6.98	0.0012	20.6
																	Mitophagy	29	3	6.98	0.0012	20.6
																	Cytokine Signaling in Immune system	770	46	20.3	1.1e-33	20.2
																	Regulation of PTEN gene transcription	61	6	9.6	5.2e-06	20.1
																	Potential therapeutics for SARS	106	10	12.1	4.9e-09	20
																	Toll Like Receptor 9 (TLR9) Cascade	106	10	12.1	4.9e-09	20
																	ISG15 antiviral mechanism	72	7	10.3	1e-06	20
																	p75 NTR receptor-mediated signalling	95	9	11.5	2.9e-08	19.9
																	Activation of BH3-only proteins	30	3	6.84	0.0013	19.8
																	FGFR1 mutant receptor activation	30	3	6.84	0.0013	19.8
																	HSF1 activation	30	3	6.84	0.0013	19.8
																	ER Quality Control Compartment (ERQC)	20	2	5.59	0.0082	19.6
																	Signalling to RAS	20	2	5.59	0.0082	19.6
																	SUMOylation of transcription factors	20	2	5.59	0.0082	19.6
																	TP53 Regulates Transcription of Genes Involved in Cytochrome C Release	20	2	5.59	0.0082	19.6
																	Signaling by FGFR1	52	5	8.65	3.7e-05	19.4
																	ESR-mediated signaling	161	14	13.7	8.7e-12	19.2
																	Regulation of MECP2 expression and activity	31	3	6.72	0.0015	19.1
																	SARS-CoV-1 Infection	137	12	12.7	3.1e-10	18.9
																	CTLA4 inhibitory signaling	21	2	5.44	0.0089	18.6
																	Regulation of FZD by ubiquitination	21	2	5.44	0.0089	18.6
																	TP53 regulates transcription of additional cell cycle genes whose exact role in the p53 pathway remain uncertain	21	2	5.44	0.0089	18.6
																	SUMOylation of transcription cofactors	43	4	7.59	0.00026	18.5
																	HDACs deacetylate histones	32	3	6.6	0.0016	18.5
																	Termination of translesion DNA synthesis	32	3	6.6	0.0016	18.5
																	Toll Like Receptor TLR1:TLR2 Cascade	115	10	11.6	1e-08	18.3
																	The role of GTSE1 in G2/M progression after G2 checkpoint	78	7	9.85	1.6e-06	18.3
																	Regulation of RUNX3 expression and activity	55	5	8.38	4.7e-05	18.2
																	G1/S DNA Damage Checkpoints	67	6	9.1	8.6e-06	18.1
																	Viral Infection Pathways	705	41	18.8	2.8e-29	17.9
																	Infectious disease	898	47	19	3.6e-32	17.8
																	CD28 co-stimulation	33	3	6.49	0.0017	17.8
																	Signaling by NOTCH2	33	3	6.49	0.0017	17.8
																	TNFR1-induced NF-kappa-B signaling pathway	33	3	6.49	0.0017	17.8
																	Transcriptional Regulation by NPAS4	33	3	6.49	0.0017	17.8
																	Regulation of TP53 Activity	159	13	12.8	1.2e-10	17.7
																	Cytosolic sulfonation of small molecules	22	2	5.29	0.0096	17.7
																	JNK (c-Jun kinases) phosphorylation and activation mediated by activated human TAK1	22	2	5.29	0.0096	17.7
																	NOTCH2 Activation and Transmission of Signal to the Nucleus	22	2	5.29	0.0096	17.7
																	PINK1-PRKN Mediated Mitophagy	22	2	5.29	0.0096	17.7
																	RAS processing	22	2	5.29	0.0096	17.7
																	Signaling by TGF-beta Receptor Complex	94	8	10.2	4.1e-07	17.5
																	Signaling by NOTCH	176	14	13	2.9e-11	17.4
																	Signaling by NOTCH4	82	7	9.57	2.1e-06	17.4
																	Signaling by PDGF	58	5	8.13	6e-05	17.2
																	Nuclear events mediated by NFE2L2	96	8	10.1	4.7e-07	17.1
																	Toll-like Receptor Cascades	165	13	12.5	1.8e-10	17
																	Interleukin-4 and Interleukin-13 signaling	110	9	10.6	9.6e-08	16.9
																	TGF-beta receptor signaling activates SMADs	47	4	7.22	0.00035	16.8
																	activated TAK1 mediates p38 MAPK activation	23	2	5.16	0.01	16.8
																	Response of Mtb to phagocytosis	23	2	5.16	0.01	16.8
																	RHOBTB2 GTPase cycle	23	2	5.16	0.01	16.8
																	Epigenetic regulation of gene expression	125	10	11	2.1e-08	16.7
																	KEAP1-NFE2L2 pathway	125	10	11	2.1e-08	16.7
																	SARS-CoV-1 modulates host translation machinery	35	3	6.27	0.002	16.7
																	G2/M DNA damage checkpoint	60	5	7.98	6.8e-05	16.6
																	NOD1/2 Signaling Pathway	36	3	6.17	0.0022	16.2
																	SUMOylation	173	13	12.2	3.1e-10	16.1
																	Incretin synthesis, secretion, and inactivation	24	2	5.04	0.011	16.1
																	RUNX2 regulates osteoblast differentiation	24	2	5.04	0.011	16.1
																	Extra-nuclear estrogen signaling	75	6	8.54	1.6e-05	16
																	PKR-mediated signaling	75	6	8.54	1.6e-05	16
																	Processing of DNA double-strand break ends	63	5	7.75	8.5e-05	15.7
																	Signaling by FGFR1 in disease	37	3	6.08	0.0023	15.7
																	Antiviral mechanism by IFN-stimulated genes	148	11	11.1	8.1e-09	15.6
																	PI3K/AKT Signaling in Cancer	105	8	9.59	9.1e-07	15.5
																	Calnexin/calreticulin cycle	25	2	4.92	0.012	15.4
																	Cyclin A/B1/B2 associated events during G2/M transition	25	2	4.92	0.012	15.4
																	Gap-filling DNA repair synthesis and ligation in GG-NER	25	2	4.92	0.012	15.4
																	Glycogen metabolism	25	2	4.92	0.012	15.4
																	Signaling by Erythropoietin	25	2	4.92	0.012	15.4
																	Signaling by NTRK2 (TRKB)	25	2	4.92	0.012	15.4
																	Regulation of TP53 Activity through Phosphorylation	92	7	8.96	4e-06	15.3
																	FCERI mediated MAPK activation	38	3	5.98	0.0025	15.3
																	Death Receptor Signaling	152	11	10.9	1e-08	15.1
																	Signaling by MET	79	6	8.28	2e-05	15.1
																	Diseases of signal transduction by growth factor receptors and second messengers	428	26	15.3	3e-18	15
																	PTEN Regulation	139	10	10.4	5.2e-08	14.9
																	NGF-stimulated transcription	39	3	5.89	0.0026	14.9
																	Platelet Aggregation (Plug Formation)	39	3	5.89	0.0026	14.9
																	Translesion synthesis by Y family DNA polymerases bypasses lesions on DNA template	39	3	5.89	0.0026	14.9
																	Downstream signaling events of B Cell Receptor (BCR)	81	6	8.17	2.3e-05	14.7
																	APC-Cdc20 mediated degradation of Nek2A	26	2	4.81	0.013	14.7
																	Circadian Clock	68	5	7.42	0.00012	14.5
																	Formation of paraxial mesoderm	68	5	7.42	0.00012	14.5
																	Signaling by ALK in cancer	54	4	6.66	0.00059	14.4
																	Interleukin-1 signaling	114	8	9.14	1.5e-06	14.2
																	Infection with Mycobacterium tuberculosis	27	2	4.71	0.014	14.1
																	Resolution of D-loop Structures through Synthesis-Dependent Strand Annealing (SDSA)	27	2	4.71	0.014	14.1
																	Intracellular signaling by second messengers	308	19	13.1	2.8e-13	14
																	Cyclin A:Cdk2-associated events at S phase entry	85	6	7.94	3e-05	14
																	Stabilization of p53	56	4	6.52	0.00067	13.9
																	Mitotic G1 phase and G1/S transition	149	10	9.97	9.7e-08	13.8
																	Regulation of PLK1 Activity at G2/M Transition	86	6	7.88	3.1e-05	13.8
																	Interleukin-17 signaling	71	5	7.23	0.00014	13.8
																	Programmed Cell Death	203	13	11.1	1.7e-09	13.6
																	Interleukin-1 family signaling	151	10	9.89	1.1e-07	13.6
																	Signaling by FGFR2	72	5	7.18	0.00015	13.6
																	Interleukin-12 family signaling	57	4	6.45	0.00071	13.6
																	TNF signaling	57	4	6.45	0.00071	13.6
																	Budding and maturation of HIV virion	28	2	4.61	0.015	13.6
																	Uptake and actions of bacterial toxins	28	2	4.61	0.015	13.6
																	Transcriptional regulation by RUNX2	120	8	8.87	2.1e-06	13.4
																	Aggrephagy	43	3	5.57	0.0033	13.4
																	PKMTs methylate histone lysines	43	3	5.57	0.0033	13.4
																	EGR2 and SOX10-mediated initiation of Schwann cell myelination	29	2	4.51	0.015	13.1
																	G1/S-Specific Transcription	29	2	4.51	0.015	13.1
																	Translation of SARS-CoV-1 Structural Proteins	29	2	4.51	0.015	13.1
																	Cellular response to chemical stress	211	13	10.8	2.7e-09	13
																	Signaling by TGFB family members	124	8	8.7	2.5e-06	12.9
																	SCF(Skp2)-mediated degradation of p27/p21	60	4	6.26	0.00084	12.9
																	Transcriptional regulation by RUNX1	177	11	9.99	4.2e-08	12.8
																	Transcriptional Regulation by TP53	359	20	12.7	3.2e-13	12.7
																	Signaling by Nuclear Receptors	236	14	11	1e-09	12.6
																	Cytoprotection by HMOX1	61	4	6.2	0.00089	12.6
																	Recognition of DNA damage by PCNA-containing replication complex	30	2	4.42	0.016	12.6
																	RMTs methylate histone arginines	30	2	4.42	0.016	12.6
																	Synthesis of active ubiquitin: roles of E1 and E2 enzymes	30	2	4.42	0.016	12.6
																	Constitutive Signaling by Aberrant PI3K in Cancer	78	5	6.84	0.00021	12.5
																	Ub-specific processing proteases	165	10	9.38	2.3e-07	12.4
																	Interferon gamma signaling	95	6	7.43	5.3e-05	12.4
																	Activation of anterior HOX genes in hindbrain development during early embryogenesis	62	4	6.14	0.00092	12.4
																	TP53 Regulates Transcription of DNA Repair Genes	62	4	6.14	0.00092	12.4
																	Negative regulation of the PI3K/AKT network	113	7	7.94	1.4e-05	12.3
																	Deubiquitination	243	14	10.8	1.4e-09	12.2
																	Chromatin modifying enzymes	204	12	10.1	1.7e-08	12.2
																	Heme signaling	47	3	5.28	0.0041	12.2
																	Activated NOTCH1 Transmits Signal to the Nucleus	31	2	4.34	0.017	12.2
																	Endosomal Sorting Complex Required For Transport (ESCRT)	31	2	4.34	0.017	12.2
																	MAPK targets/ Nuclear events mediated by MAP kinases	31	2	4.34	0.017	12.2
																	RUNX2 regulates bone development	31	2	4.34	0.017	12.2
																	G2/M Checkpoints	133	8	8.34	4e-06	12
																	Cellular response to heat stress	99	6	7.25	6.5e-05	11.9
																	DNA Damage Bypass	48	3	5.22	0.0044	11.9
																	Signaling by the B Cell Receptor (BCR)	118	7	7.74	1.8e-05	11.7
																	CLEC7A (Dectin-1) signaling	100	6	7.21	6.8e-05	11.7
																	Fc epsilon receptor (FCERI) signaling	137	8	8.2	4.8e-06	11.6
																	SARS-CoV-2 modulates host translation machinery	49	3	5.15	0.0046	11.6
																	Degradation of beta-catenin by the destruction complex	84	5	6.55	0.00029	11.5
																	Transcriptional regulation of white adipocyte differentiation	84	5	6.55	0.00029	11.5
																	C-type lectin receptors (CLRs)	140	8	8.09	5.4e-06	11.4
																	Diseases of carbohydrate metabolism	33	2	4.18	0.019	11.4
																	RAF activation	33	2	4.18	0.019	11.4
																	HDR through Homologous Recombination (HRR)	68	4	5.81	0.0013	11.3
																	FCERI mediated NF-kB activation	87	5	6.41	0.00034	11.1
																	Regulation of PTEN stability and activity	69	4	5.76	0.0013	11.1
																	Signaling by Interleukins	459	22	12.1	2.9e-13	11
																	Signaling by FGFR	88	5	6.36	0.00035	11
																	Late endosomal microautophagy	34	2	4.1	0.02	11
																	Nonhomologous End-Joining (NHEJ)	34	2	4.1	0.02	11
																	N-glycan trimming in the ER and Calnexin/Calreticulin cycle	34	2	4.1	0.02	11
																	RHO GTPases activate PKNs	34	2	4.1	0.02	11
																	Signalling to ERKs	34	2	4.1	0.02	11
																	Transcriptional Regulation by E2F6	34	2	4.1	0.02	11
																	Selenoamino acid metabolism	107	6	6.92	9.7e-05	10.9
																	Amyloid fiber formation	52	3	4.97	0.0052	10.9
																	AURKA Activation by TPX2	71	4	5.66	0.0015	10.8
																	MAPK6/MAPK4 signaling	90	5	6.28	0.00039	10.7
																	Formation of TC-NER Pre-Incision Complex	53	3	4.91	0.0055	10.7
																	Resolution of D-Loop Structures	35	2	4.03	0.021	10.7
																	RHOBTB GTPase Cycle	35	2	4.03	0.021	10.7
																	Apoptosis	171	9	8.16	2.6e-06	10.5
																	TCF dependent signaling in response to WNT	172	9	8.13	2.7e-06	10.5
																	Negative regulation of NOTCH4 signaling	54	3	4.86	0.0056	10.5
																	Transcriptional activation of mitochondrial biogenesis	54	3	4.86	0.0056	10.5
																	Regulation of RUNX2 expression and activity	73	4	5.56	0.0016	10.4
																	Mitotic G2-G2/M phases	198	10	8.39	1.1e-06	10.2
																	DNA Double-Strand Break Repair	134	7	7.16	3.7e-05	10.2
																	Cellular responses to stimuli	746	30	12.8	2.4e-16	10.1
																	Gastrulation	115	6	6.62	0.00014	10.1
																	Cellular response to hypoxia	75	4	5.47	0.0017	10.1
																	HSP90 chaperone cycle for steroid hormone receptors (SHR) in the presence of ligand	56	3	4.75	0.0061	10.1
																	Association of TriC/CCT with target proteins during biosynthesis	37	2	3.9	0.023	10.1
																	HDR through Single Strand Annealing (SSA)	37	2	3.9	0.023	10.1
																	Plasma lipoprotein clearance	37	2	3.9	0.023	10.1
																	RUNX1 interacts with co-factors whose precise effect on RUNX1 targets is not known	37	2	3.9	0.023	10.1
																	Diseases of mitotic cell cycle	38	2	3.83	0.024	9.81
																	DNA Damage Recognition in GG-NER	38	2	3.83	0.024	9.81
																	Activation of the mRNA upon binding of the cap-binding complex and eIFs, and subsequent binding to 43S	58	3	4.65	0.0067	9.73
																	Meiosis	58	3	4.65	0.0067	9.73
																	Hemostasis	608	25	11.8	1.2e-13	9.7
																	Signaling by Receptor Tyrosine Kinases	523	22	11.2	3.7e-12	9.58
																	Response of EIF2AK4 (GCN2) to amino acid deficiency	100	5	5.88	0.00062	9.57
																	Fanconi Anemia Pathway	39	2	3.77	0.025	9.54
																	HATs acetylate histones	80	4	5.26	0.0022	9.48
																	Recruitment of mitotic centrosome proteins and complexes	80	4	5.26	0.0022	9.48
																	Selective autophagy	81	4	5.22	0.0023	9.35
																	NS1 Mediated Effects on Host Pathways	40	2	3.71	0.026	9.3
																	RET signaling	40	2	3.71	0.026	9.3
																	RHOU GTPase cycle	40	2	3.71	0.026	9.3
																	Nuclear Events (kinase and transcription factor activation)	61	3	4.5	0.0075	9.22
																	Transcriptional Regulation by MECP2	61	3	4.5	0.0075	9.22
																	Leishmania infection	171	8	7.15	2.1e-05	9.19
																	Homology Directed Repair	104	5	5.74	0.00073	9.18
																	Cargo recognition for clathrin-mediated endocytosis	105	5	5.7	0.00075	9.09
																	Dectin-1 mediated noncanonical NF-kB signaling	62	3	4.46	0.0078	9.07
																	Signaling by FGFR in disease	62	3	4.46	0.0078	9.07
																	Dual Incision in GG-NER	41	2	3.65	0.027	9.06
																	MET promotes cell motility	41	2	3.65	0.027	9.06
																	TP53 Regulates Metabolic Genes	84	4	5.1	0.0026	9
																	Maternal to zygotic transition (MZT)	63	3	4.41	0.0081	8.91
																	Innate Immune System	1047	35	12.3	7.1e-17	8.86
																	Formation of WDR5-containing histone-modifying complexes	42	2	3.6	0.028	8.83
																	Influenza Infection	154	7	6.56	8.3e-05	8.82
																	Signaling by BRAF and RAF1 fusions	64	3	4.37	0.0083	8.77
																	Regulation of mRNA stability by proteins that bind AU-rich elements	87	4	4.98	0.0029	8.67
																	Cell Cycle Checkpoints	256	11	7.95	1.3e-06	8.66
																	Dual incision in TC-NER	65	3	4.32	0.0087	8.63
																	E3 ubiquitin ligases ubiquitinate target proteins	43	2	3.55	0.029	8.61
																	Formation of Incision Complex in GG-NER	43	2	3.55	0.029	8.61
																	Homologous DNA Pairing and Strand Exchange	43	2	3.55	0.029	8.61
																	Negative regulation of MAPK pathway	43	2	3.55	0.029	8.61
																	Signaling by NTRKs	134	6	6.01	0.00029	8.6
																	APC/C-mediated degradation of cell cycle proteins	88	4	4.95	0.003	8.57
																	RNA Polymerase II Transcription	1284	39	12.2	1.2e-17	8.46
																	Signaling by moderate kinase activity BRAF mutants	44	2	3.49	0.031	8.41
																	TP53 Regulates Transcription of Cell Death Genes	44	2	3.49	0.031	8.41
																	Eukaryotic Translation Elongation	92	4	4.81	0.0033	8.18
																	Recruitment of NuMA to mitotic centrosomes	93	4	4.77	0.0035	8.09
																	Interleukin-10 signaling	46	2	3.4	0.033	8.03
																	Costimulation by the CD28 family	70	3	4.12	0.01	7.98
																	RUNX1 regulates transcription of genes involved in differentiation of HSCs	70	3	4.12	0.01	7.98
																	TCR signaling	119	5	5.26	0.0012	7.97
																	Clathrin-mediated endocytosis	145	6	5.71	0.00043	7.91
																	Anchoring of the basal body to the plasma membrane	95	4	4.71	0.0037	7.91
																	Fcgamma receptor (FCGR) dependent phagocytosis	95	4	4.71	0.0037	7.91
																	Orc1 removal from chromatin	71	3	4.08	0.011	7.86
																	Interleukin-12 signaling	47	2	3.35	0.034	7.85
																	MAPK family signaling cascades	321	12	7.58	1.6e-06	7.55
																	Cell death signalling via NRAGE, NRIF and NADE	74	3	3.97	0.012	7.53
																	HCMV Early Events	74	3	3.97	0.012	7.53
																	Mitochondrial biogenesis	74	3	3.97	0.012	7.53
																	Diseases of DNA repair	51	2	3.17	0.04	7.21
																	Transcription-Coupled Nucleotide Excision Repair (TC-NER)	78	3	3.84	0.013	7.13
																	Signaling by VEGF	106	4	4.38	0.0051	7.05
																	S Phase	163	6	5.28	0.00076	7
																	Cell Cycle	628	20	8.83	3.7e-09	6.94
																	Oncogenic MAPK signaling	80	3	3.77	0.014	6.94
																	Cell Cycle, Mitotic	497	16	7.93	1.4e-07	6.72
																	SRP-dependent cotranslational protein targeting to membrane	111	4	4.24	0.0058	6.72
																	AUF1 (hnRNP D0) binds and destabilizes mRNA	55	2	3.01	0.045	6.66
																	Degradation of AXIN	55	2	3.01	0.045	6.66
																	SCF-beta-TrCP mediated degradation of Emi1	55	2	3.01	0.045	6.66
																	Signaling by WNT	268	9	6.09	6.8e-05	6.54
																	SUMOylation of chromatin organization proteins	56	2	2.98	0.047	6.54
																	Nonsense-Mediated Decay (NMD)	114	4	4.17	0.0062	6.53
																	Degradation of DVL	57	2	2.94	0.048	6.42
																	Translation of SARS-CoV-2 Structural Proteins	57	2	2.94	0.048	6.42
																	Regulation of lipid metabolism by PPARalpha	117	4	4.09	0.0068	6.36
																	Eukaryotic Translation Initiation	118	4	4.07	0.0069	6.3
																	Iron uptake and transport	58	2	2.9	0.049	6.3
																	RAB GEFs exchange GTP for GDP on RABs	88	3	3.53	0.018	6.28
																	Autophagy	150	5	4.5	0.003	6.25
																	Metabolism of amino acids and derivatives	356	11	6.36	2e-05	6.11
																	DNA Repair	286	9	5.81	0.00011	6.11
																	Cellular response to starvation	154	5	4.41	0.0033	6.08
																	Switching of origins to a post-replicative state	92	3	3.42	0.02	6
																	Reproduction	95	3	3.35	0.021	5.8
																	Developmental Biology	1156	28	8.63	4.7e-10	5.66
																	HCMV Infection	98	3	3.27	0.023	5.62
																	DNA Replication Pre-Initiation	100	3	3.22	0.024	5.5
																	TNFR2 non-canonical NF-kB pathway	101	3	3.2	0.024	5.45
																	Antigen processing-Cross presentation	105	3	3.11	0.027	5.23
																	RHO GTPase Effectors	262	7	4.53	0.0015	5.05
																	Beta-catenin independent WNT signaling	146	4	3.48	0.013	5.05
																	Organelle biogenesis and maintenance	263	7	4.52	0.0016	5.03
																	Nucleotide Excision Repair	110	3	3	0.03	4.99
																	rRNA processing	198	5	3.66	0.0081	4.68
																	Rab regulation of trafficking	120	3	2.81	0.037	4.56
																	Synthesis of DNA	121	3	2.79	0.037	4.52
																	Regulation of expression of SLITs and ROBOs	170	4	3.09	0.02	4.32
																	Signaling by ROBO receptors	216	5	3.41	0.011	4.28
																	DNA Replication	128	3	2.66	0.043	4.26
																	Host Interactions of HIV factors	130	3	2.63	0.044	4.2
																	Cilium Assembly	189	4	2.83	0.028	3.87
																	Post-translational protein modification	1348	24	6.12	2e-06	3.86
																	Neddylation	244	5	3.08	0.017	3.77
																	Nervous system development	576	11	4.32	0.00095	3.68
																	Mitotic Prometaphase	201	4	2.68	0.033	3.63
																	Vesicle-mediated transport	671	11	3.73	0.0029	3.13
																	M Phase	353	6	2.83	0.02	3.13
																	Membrane Trafficking	624	10	3.47	0.0049	3.04
																	Adaptive Immune System	773	12	3.69	0.0028	2.98
																	Signaling by Rho GTPases, Miro GTPases and RHOBTB3	649	9	2.8	0.016	2.59

## Sheet: Table S2.5
Table S2.5.1 Top prioritized targets from the integrated Si method for East Asian Liver																	Table S2.5.2 Pathway enrichment of top 100 genes of East Asian Liver
Target gene	Priority		Genomic predictors			Seeds	Annotation predictors			Crosstalk	Novelty		Druggability		Description		Pathway	Pathway Size	Overlap Count	Z-score	Adjusted P-value	Odds Ratio
	rank	rating	nGene	cGene	eGene		fGene	pGene	dGene		PCOS drug traget	Approved for other diseases	PDBs	PDBs (with pockets)			SARS-CoV-1 modulates host translation machinery	35	19	41.5	1.9e-32	244
RPS26	1	5	1	0	3	Y	1	0	0	Y	N	Y	15	3	ribosomal protein S26		Hormone ligand-binding receptors	12	6	22.3	6.3e-10	177
LEP	2	4.17406	0	0	1	Y	1	1	1	Y	N	N	1	1	leptin		SARS-CoV-2 modulates host translation machinery	49	19	34.9	4.6e-29	131
FSHB	3	3.99933	1	0	0	Y	1	1	1	Y	N	N	4	1	follicle stimulating hormone beta subunit		Activation of the mRNA upon binding of the cap-binding complex and eIFs, and subsequent binding to 43S	58	19	32	2e-27	101
ERBB3	4	3.97284	1	0	0	Y	1	0	1	Y	N	Y	21	8	erb-b2 receptor tyrosine kinase 3		Eukaryotic Translation Elongation	92	27	36.1	4e-37	95.3
SUOX	5	3.95365	1	1	1	Y	1	0	0	Y	N	N	1	0	sulfite oxidase		Selenoamino acid metabolism	107	29	35.9	1.2e-38	87.7
FSHR	6	3.94298	1	0	0	Y	1	0	1	Y	P3	Y	3	0	follicle stimulating hormone receptor		Response of EIF2AK4 (GCN2) to amino acid deficiency	100	27	34.6	3.6e-36	84.9
PA2G4	7	3.94257	0	1	0	Y	1	0	0	Y	N	N	3	2	proliferation-associated 2G4		Spry regulation of FGF signaling	16	5	16	4.3e-07	80.2
STRN3	8	3.85051	0	0	1	Y	1	1	1	N	N	N	4	3	striatin 3		Downregulation of ERBB2:ERBB3 signaling	13	4	14.2	7.7e-06	77.6
KIR3DL2	9	3.77441	0	0	1	Y	1	1	1	Y	N	N	0	0	killer cell immunoglobulin like receptor, three Ig domains and long cytoplasmic tail 2		Listeria monocytogenes entry into host cells	20	6	17.2	2.3e-08	76.4
CDK2	10	3.76753	1	0	0	Y	1	0	0	Y	N	N	428	239	cyclin dependent kinase 2		SRP-dependent cotranslational protein targeting to membrane	111	27	32.7	6.5e-35	73.7
EGFR	11	3.56632	0	0	0	N	0	0	0	Y	N	Y	252	131	epidermal growth factor receptor		SARS-CoV-1-host interactions	92	23	30.6	3.1e-30	72.5
GH1	12	3.54633	0	0	0	N	0	0	0	Y	N	N	10	3	growth hormone 1		Nonsense-Mediated Decay (NMD)	114	27	32.3	1.2e-34	71.2
GRB2	13	3.52017	0	0	0	N	0	0	0	Y	N	N	54	27	growth factor receptor bound protein 2		Peptide hormone biosynthesis	14	4	13.7	1e-05	69.9
PAPSS2	14	3.515	0	0	0	N	0	0	0	Y	N	N	3	0	3'-phosphoadenosine 5'-phosphosulfate synthase 2		Eukaryotic Translation Initiation	118	27	31.7	2.7e-34	68.1
HLA-B	15	3.49838	0	0	0	N	0	0	0	Y	N	N	219	51	major histocompatibility complex, class I, B		Signaling by Leptin	11	3	11.5	0.00021	64.8
EIF2S3B	16	3.48939	0	0	0	N	0	0	0	N	N	N	0	0	NA		Degradation of cysteine and homocysteine	15	4	13.2	1.3e-05	63.5
CDH1	17	3.48472	0	0	0	N	0	0	0	Y	N	N	15	3	cadherin 1		Constitutive Signaling by Ligand-Responsive EGFR Cancer Variants	19	5	14.6	9.6e-07	63
RPS27A	18	3.47856	0	0	0	N	0	0	0	Y	N	Y	46	14	ribosomal protein S27a		PECAM1 interactions	12	3	11	0.00027	57.6
PRL	19	3.45304	0	0	0	N	0	0	0	Y	N	N	12	9	prolactin		GAB1 signalosome	17	4	12.3	2.2e-05	53.7
UBA52	20	3.43842	0	0	0	N	0	0	0	Y	N	N	43	19	ubiquitin A-52 residue ribosomal protein fusion product 1		Zygotic genome activation (ZGA)	13	3	10.6	0.00034	51.9
PTPN11	21	3.40953	0	0	0	N	0	0	0	Y	N	N	70	28	protein tyrosine phosphatase, non-receptor type 11		Cellular response to starvation	154	27	27.5	3.5e-31	48.7
CCT7	22	3.40725	0	0	0	N	0	0	0	Y	N	N	13	2	chaperonin containing TCP1 subunit 7		Influenza Infection	154	27	27.5	3.5e-31	48.7
CTNNB1	23	3.40556	0	0	0	N	0	0	0	Y	N	N	20	13	catenin beta 1		Regulation of TP53 Activity through Methylation	19	4	11.6	3.3e-05	46.7
RPS21	24	3.39862	0	0	0	N	0	0	0	Y	N	Y	25	6	ribosomal protein S21		Regulation of expression of SLITs and ROBOs	170	28	27.1	1.6e-31	45.7
APP	25	3.37416	0	0	0	N	0	0	0	Y	N	Y	96	30	amyloid beta precursor protein		Signaling by EGFR in Cancer	25	5	12.7	3.6e-06	44.1
TPH2	26	3.36153	0	0	1	Y	1	0	1	Y	N	Y	1	0	tryptophan hydroxylase 2		SARS-CoV-1 Infection	137	23	24.8	4.4e-26	43.9
TP53	27	3.35824	0	0	0	N	0	0	0	Y	N	N	170	63	tumor protein p53		Constitutive Signaling by EGFRvIII	15	3	9.81	0.00048	43.2
RPS25	28	3.34954	0	0	0	N	0	0	0	Y	N	Y	24	6	ribosomal protein S25		InlB-mediated entry of Listeria monocytogenes into host cell	15	3	9.81	0.00048	43.2
LHX2	29	3.34815	0	1	0	Y	1	0	1	N	N	N	0	0	LIM homeobox 2		Negative regulation of FLT3	15	3	9.81	0.00048	43.2
TSR2	30	3.34527	0	0	0	N	0	0	0	N	N	N	0	0	TSR2, ribosome maturation factor		Prolactin receptor signaling	15	3	9.81	0.00048	43.2
IKZF4	31	3.33385	1	0	0	Y	1	0	1	N	N	N	1	0	IKAROS family zinc finger 4		Signal regulatory protein family interactions	15	3	9.81	0.00048	43.2
LHCGR	32	3.33155	1	0	0	Y	1	0	0	Y	P3	Y	4	2	luteinizing hormone/choriogonadotropin receptor		Signaling by CSF1 (M-CSF) in myeloid cells	31	6	13.6	3.9e-07	42.8
SRC	33	3.3219	0	0	0	N	0	0	0	Y	N	Y	62	14	SRC proto-oncogene, non-receptor tyrosine kinase		IRAK2 mediated activation of TAK1 complex	10	2	8.01	0.0044	42.8
EIF2D	34	3.31612	0	0	0	N	0	0	0	N	N	N	3	1	eukaryotic translation initiation factor 2D		RUNX3 regulates p14-ARF	10	2	8.01	0.0044	42.8
EP300	35	3.31553	0	0	0	N	0	0	0	Y	N	N	42	26	E1A binding protein p300		Signal attenuation	10	2	8.01	0.0044	42.8
INSR	36	3.31353	1	0	0	Y	1	0	0	Y	N	Y	55	25	insulin receptor		STAT3 nuclear events downstream of ALK signaling	10	2	8.01	0.0044	42.8
GAGE10	37	3.31274	0	0	0	N	0	0	0	N	N	N	0	0	G antigen 10		STAT5 activation downstream of FLT3 ITD mutants	10	2	8.01	0.0044	42.8
GAGE12C	37	3.31274	0	0	0	N	0	0	0	N	N	N	0	0	G antigen 12C		Thyroxine biosynthesis	10	2	8.01	0.0044	42.8
GAGE12D	37	3.31274	0	0	0	N	0	0	0	N	N	N	0	0	G antigen 12D		PI3K events in ERBB2 signaling	16	3	9.48	0.00057	39.9
GAGE12E	37	3.31274	0	0	0	N	0	0	0	N	N	N	0	0	G antigen 12E		Signaling by ERBB2 ECD mutants	16	3	9.48	0.00057	39.9
GAGE12H	37	3.31274	0	0	0	N	0	0	0	N	N	N	0	0	G antigen 12H		Signaling by ROBO receptors	216	30	25.7	1.5e-31	38.4
GAGE12J	37	3.31274	0	0	0	N	0	0	0	N	N	N	0	0	G antigen 12J		FLT3 signaling in disease	28	5	11.9	6.3e-06	38.4
GAGE13	37	3.31274	0	0	0	N	0	0	0	N	N	N	0	0	G antigen 13		Activated NTRK2 signals through FRS2 and FRS3	11	2	7.61	0.005	38
GAGE2A	37	3.31274	0	0	0	N	0	0	0	N	N	N	0	0	G antigen 2A		Alpha-protein kinase 1 signaling pathway	11	2	7.61	0.005	38
PAPSS1	45	3.30852	0	0	0	N	0	0	0	Y	N	N	8	1	3'-phosphoadenosine 5'-phosphosulfate synthase 1		Androgen biosynthesis	11	2	7.61	0.005	38
RPS17	46	3.29899	0	0	0	N	0	0	0	Y	N	Y	27	7	ribosomal protein S17		Apoptotic cleavage of cell adhesion proteins	11	2	7.61	0.005	38
HSP90AB1	47	3.2977	0	0	0	N	0	0	0	Y	N	N	13	5	heat shock protein 90 alpha family class B member 1		Interleukin-6 signaling	11	2	7.61	0.005	38
IKZF3	48	3.2906	1	0	0	Y	0	0	1	N	N	N	0	0	IKAROS family zinc finger 3		Pexophagy	11	2	7.61	0.005	38
CYB5R2	49	3.2891	0	0	0	N	0	0	0	Y	N	N	0	0	cytochrome b5 reductase 2		Regulation of BACH1 activity	11	2	7.61	0.005	38
RPS3A	50	3.28878	0	0	0	N	0	0	0	Y	N	Y	25	7	ribosomal protein S3A		Signaling by FGFR4 in disease	11	2	7.61	0.005	38
SQOR	51	3.28488	0	0	0	N	0	0	0	Y	N	N	7	7	sulfide quinone oxidoreductase		TICAM1,TRAF6-dependent induction of TAK1 complex	11	2	7.61	0.005	38
FAU	52	3.27563	0	0	0	N	0	0	0	Y	N	Y	0	0	FAU, ubiquitin like and ribosomal protein S30 fusion		Activation of IRF3, IRF7 mediated by TBK1, IKBKE	17	3	9.18	0.00065	37
RUNX1	53	3.27203	0	0	0	N	0	0	0	Y	N	N	5	3	runt related transcription factor 1		Regulation of RUNX1 Expression and Activity	17	3	9.18	0.00065	37
RPS24	54	3.27043	0	0	0	N	0	0	0	Y	N	Y	25	6	ribosomal protein S24		Signaling by NTRK3 (TRKC)	17	3	9.18	0.00065	37
RPS28	55	3.26921	0	0	0	N	0	0	0	Y	N	Y	24	6	ribosomal protein S28		Downregulation of ERBB2 signaling	29	5	11.7	7e-06	36.7
AKT1	56	3.25636	0	0	0	N	0	0	0	N	N	N	35	7	AKT serine/threonine kinase 1		Downstream signal transduction	29	5	11.7	7e-06	36.7
FLT3LG	57	3.25574	0	0	0	N	0	0	0	N	N	N	4	3	fms related tyrosine kinase 3 ligand		Negative regulation of FGFR3 signaling	29	5	11.7	7e-06	36.7
RPS23	58	3.25367	0	0	0	N	0	0	0	N	N	Y	25	6	ribosomal protein S23		rRNA processing	198	27	24.1	3.6e-28	36.1
GCG	59	3.25248	0	0	0	N	0	0	0	N	N	N	33	8	glucagon		Signaling by CSF3 (G-CSF)	30	5	11.5	8e-06	35.3
RPS19	60	3.24985	0	0	0	N	0	0	0	N	N	Y	24	5	ribosomal protein S19		Signaling by ERBB2	50	8	14.2	9.1e-09	34.7
STK4	61	3.2498	0	0	0	N	0	0	0	N	N	N	8	3	serine/threonine kinase 4		Metabolism of amine-derived hormones	18	3	8.9	0.00075	34.6
STAT3	62	3.24477	0	0	0	N	0	0	0	N	N	N	4	2	signal transducer and activator of transcription 3		Regulation of NF-kappa B signaling	18	3	8.9	0.00075	34.6
ETHE1	63	3.24452	0	0	0	N	0	0	0	N	N	N	1	0	ETHE1, persulfide dioxygenase		Josephin domain DUBs	12	2	7.27	0.0056	34.2
RPS2	64	3.24275	0	0	0	N	0	0	0	N	N	Y	25	6	ribosomal protein S2		SARS-CoV-2 targets host intracellular signalling and regulatory pathways	12	2	7.27	0.0056	34.2
RACK1	65	3.24211	0	0	0	N	0	0	0	N	N	N	24	4	receptor for activated C kinase 1		Signaling by PDGFRA transmembrane, juxtamembrane and kinase domain mutants	12	2	7.27	0.0056	34.2
RPS15	66	3.24202	0	0	0	N	0	0	0	N	N	Y	25	6	ribosomal protein S15		TICAM1-dependent activation of IRF3/IRF7	12	2	7.27	0.0056	34.2
[truncated: 375 more rows]

## Sheet: Table S2.6
Table S2.6.1 Top prioritized targets from the integrated Si method for European Liver																	Table S2.6.2 Pathway enrichment of top 100 genes of European Liver
[truncated: 272 more rows]

[truncated: 9 more sheets: Table S2.8, Table S2.7, Table S2.9, Table S2.10, Table S2.11, Table S2.12, Table S2.13, Table S2.14, Table S2.15]
