# Supplementary material for: Evidence-based genetic variants to gene mapping and prioritization uncovers distinct molecular pathophysiology and therapeutic landscape in polycystic ovary syndrome patients of different ethnicities.
Source: Research Square preprint supplement (doi:10.21203/rs.3.rs-8610143/v1), 2026-01-22
Supplement: Supplementary file 3 [file 1dd350b0a3e888c7c8ce1fd4.xlsx]

## Sheet: Table S8.1
Table S8.1.1 Clusters in self-organising map (SupraHex analysis) of East Asian												Table S8.1.2 Pathway enrichment of C3 crosstalk genes
Target	Index	Cluster	Si score							Druggable		Pathway	Pathway Size	Overlap Count	Z-score	Adjusted P-value	Odds Ratio
			Ovary	Adipose	Liver	Muscle	Pancreas	Cortex	Pituitary			Signaling by ERBB2	10	10	4.19	0.00094	Inf
CAMKMT	H20	C1	4.00308	0.976253	1.67827	1.1412	1.46887	1.55168	1.02236	No		Signaling by ERBB4	10	10	4.19	0.00094	Inf
APP	H31	C3	3.74579	3.44047	3.37416	3.18052	3.55403	3.3349	3.46623	Yes		Transcriptional Regulation by TP53	11	10	3.77	0.0028	19.6
CYB5R2	H28	C3	3.95072	4.32262	3.2891	3.72015	4.05168	3.33487	3.56315	No		Cell Cycle	12	10	3.39	0.0075	9.73
CYCS	H28	C3	3.78761	3.82602	3.23202	3.46152	3.93018	3.47647	3.24924	Yes		Cell Cycle, Mitotic	11	9	3.13	0.012	8.57
ETHE1	H28	C3	3.96498	4.26956	3.24452	3.70722	4.06335	3.31148	3.43851	No		Diseases of signal transduction by growth factor receptors and second messengers	22	17	4.14	0.00098	7.6
GPHN	H28	C3	3.73589	4.15184	3.19691	3.62847	3.79883	3.25282	3.51095	No		MAPK family signaling cascades	16	12	3.25	0.0088	5.99
HADHB	H6	C3	3.48593	3.5324	2.82221	3.13389	3.73002	3.27436	3.07698	Yes		Signaling by Receptor Tyrosine Kinases	25	18	3.87	0.0021	5.78
MPST	H28	C3	3.84492	4.08087	3.16907	3.65493	3.83123	3.31563	3.32384	Yes		Intracellular signaling by second messengers	15	11	2.99	0.016	5.37
PAPSS1	H28	C3	3.85902	4.02929	3.30852	3.53343	3.92343	3.31704	3.30453	Yes		Membrane Trafficking	24	17	3.65	0.0028	5.31
PAPSS2	H28	C3	4.10921	4.30253	3.515	3.7336	4.05333	3.37319	3.56616	No		Vesicle-mediated transport	24	17	3.65	0.0028	5.31
SQOR	H28	C3	3.74217	4.09716	3.28488	3.55674	3.90551	3.29122	3.23981	Yes		Post-translational protein modification	18	13	3.21	0.0088	5.26
SUOX	H29	C3	4.67079	5	3.95365	4.62938	4.61269	3.77132	4.06942	No		Signaling by Rho GTPases, Miro GTPases and RHOBTB3	11	8	2.48	0.061	4.93
TST	H28	C3	3.86626	4.08729	3.22387	3.64934	3.86956	3.3251	3.31292	No		Signaling by NTRKs	10	7	2.17	0.097	4.22
CLTC	H5	C3	3.82935	3.60249	2.77022	3.56673	3.21425	3.43021	2.9785	No		Signaling by WNT	10	7	2.17	0.097	4.22
DENND1A	H14	C3	4.55439	4.36073	2.26962	4.50244	3.28393	3.73901	2.9033	Yes		RNA Polymerase II Transcription	32	20	3.26	0.0075	3.74
DENND1B	H1	C3	3.87049	3.87914	1.76539	3.7111	2.54298	3.15187	2.29304	Yes		Innate Immune System	22	14	2.71	0.029	3.51
EEA1	H2	C4	3.03001	2.83416	2.03568	3.61794	2.94599	2.83362	2.56234	Yes		ESR-mediated signaling	14	9	2.15	0.097	3.33
GAPVD1	H7	C4	3.22413	2.99726	2.33684	3.72273	2.94355	3.60023	2.64966	No		Signaling by Nuclear Receptors	14	9	2.15	0.097	3.33
GDI1	H2	C4	3.28424	3.02709	2.23052	3.66431	2.82887	3.02665	2.64269	No		Cytokine Signaling in Immune system	18	11	2.18	0.097	2.97
GDI2	H2	C4	3.37147	3.0253	2.41562	3.64958	2.81038	3.00466	2.59692	No		Adaptive Immune System	15	9	1.87	0.14	2.75
MADD	H1	C3	3.81227	3.7405	2.00015	3.6689	2.71872	3.05163	2.54463	No		RAB GEFs exchange GTP for GDP on RABs	15	9	1.87	0.14	2.75
PIK3C3	H2	C4	3.27987	2.97297	2.75861	3.57816	2.88223	2.77879	2.7629	Yes		Rab regulation of trafficking	15	9	1.87	0.14	2.75
RAB35	H5	C3	4.27234	3.75739	2.58166	3.88418	3.00405	3.24897	2.87218	Yes		Hemostasis	16	9	1.61	0.21	2.33
RAB5A	H1	C3	3.57624	3.29301	2.64559	3.76943	3.16902	3.15414	3.13372	Yes		Transport of small molecules	10	5	0.825	0.69	1.71
RAB5B	H29	C3	3.79689	3.75287	2.90624	4.94588	3.60768	3.49368	3.28047	No		Developmental Biology	52	19	-0.227	1	0.922
RAB5C	H1	C3	3.35266	3.08106	2.57459	3.63246	2.98742	2.96898	2.93253	Yes		SARS-CoV Infections	29	10	-0.407	1	0.838
RABGEF1	H2	C4	3.07918	2.9297	2.24166	3.66385	2.98301	2.95206	2.6001	Yes		SARS-CoV-1-host interactions	24	8	-0.489	1	0.795
RIN1	H1	C3	3.56286	3.40723	2.28359	4.07334	3.14901	3.21618	2.93986	No		SARS-CoV-1 Infection	25	8	-0.652	1	0.738
RIN2	H2	C4	2.74196	2.80159	1.70199	3.94517	3.07298	2.61644	2.30497	No		SARS-CoV-2-host interactions	26	7	-1.26	1	0.551
RIN3	H2	C4	2.93938	2.7872	1.94583	3.65819	2.60156	2.59011	2.44644	No		SARS-CoV-2 Infection	26	7	-1.26	1	0.551
YWHAB	H5	C3	3.80777	3.31162	2.83852	3.56567	3.15575	3.33696	2.95929	Yes		Infectious disease	58	17	-1.72	1	0.54
ADCYAP1	H25	C2	3.99752	3.39279	2.9351	2.07656	2.53911	2.48785	3.97014	Yes		Nervous system development	44	12	-1.72	1	0.511
ADORA2A	H23	C1	3.06314	3.13712	2.90459	2.20209	1.97204	2.00348	3.9146	Yes		Cellular responses to stimuli	40	10	-1.95	1	0.449
ADRB1	H22	C1	2.78799	2.9874	2.68003	2.03195	1.78018	1.84378	3.77985	Yes		Viral Infection Pathways	48	12	-2.23	1	0.423
CGA	H26	C2	3.87082	3.71099	3.2349	2.25628	2.55522	2.67693	4.21009	Yes		Signaling by GPCR	35	8	-2.09	1	0.402
CGB3	H23	C1	3.32891	3.572	2.6216	1.82595	1.8121	1.81776	3.99245	No		Metabolism of amino acids and derivatives	43	10	-2.34	1	0.388
CGB5	H23	C1	3.33794	3.70006	2.91908	2.06282	1.79262	1.87728	4.21505	No		Influenza Infection	35	5	-3.29	1	0.203
CGB8	H23	C1	3.3073	3.46465	2.3332	1.62817	1.71477	1.7731	3.79225	Yes		Selenoamino acid metabolism	35	5	-3.29	1	0.203
DRD1	H23	C1	2.80642	3.03927	2.77879	2.0024	1.73753	1.8306	3.8562	Yes		Class A/1 (Rhodopsin-like receptors)	17	2	-2.35	1	0.191
DRD5	H23	C1	2.82583	3.14731	2.78325	2.01769	1.90946	1.78574	3.94888	No		Activation of the mRNA upon binding of the cap-binding complex and eIFs, and subsequent binding to 43S	18	2	-2.49	1	0.177
FSHB	H26	C2	3.83135	4.16999	3.99933	2.75843	2.47456	2.57606	5	Yes		SARS-CoV-1 modulates host translation machinery	18	2	-2.49	1	0.177
FSHR	H27	C3	4.65942	3.85349	3.94298	2.95715	3.13946	3.6106	4.79052	No		SARS-CoV-2 modulates host translation machinery	18	2	-2.49	1	0.177
GCG	H25	C2	3.76702	3.53649	3.25248	2.32617	2.76803	2.54458	3.89707	Yes		Signaling by ROBO receptors	35	4	-3.68	1	0.151
GIP	H25	C2	3.72526	3.335	2.97774	2.05406	2.54071	2.46621	3.88354	No		Metabolism of RNA	36	4	-3.8	1	0.144
GIPR	H23	C1	2.84236	3.17839	2.78853	1.94003	1.70591	1.73594	3.98921	No		Cellular response to starvation	33	3	-3.86	1	0.117
GNAS	H26	C2	4.02624	3.52562	3.19789	2.6527	2.81121	2.80541	3.94911	Yes		Eukaryotic Translation Elongation	33	3	-3.86	1	0.117
GNB1	H12	C2	3.78881	3.45243	3.1081	2.61884	2.73121	2.70177	3.8935	Yes		Eukaryotic Translation Initiation	33	3	-3.86	1	0.117
GNG2	H25	C2	3.76685	3.43742	3.0549	2.47964	2.48562	2.47381	3.9067	Yes		Nonsense-Mediated Decay (NMD)	33	3	-3.86	1	0.117
GPHA2	H26	C2	3.84571	3.77069	3.20742	2.29692	2.51616	2.7404	4.33861	No		Regulation of expression of SLITs and ROBOs	33	3	-3.86	1	0.117
GPHB5	H25	C2	3.84786	3.60829	2.96721	2.05218	2.49067	2.74934	4.00584	No		Response of EIF2AK4 (GCN2) to amino acid deficiency	33	3	-3.86	1	0.117
GPR119	H23	C1	2.9426	3.25143	2.87555	1.95996	1.70634	1.73475	4.06269	No		rRNA processing	33	3	-3.86	1	0.117
HTR6	H23	C1	2.81619	3.08833	2.77048	1.93174	1.77193	1.73402	3.89393	No		SRP-dependent cotranslational protein targeting to membrane	33	3	-3.86	1	0.117
LHCGR	H26	C2	4.60493	4.4178	3.33155	2.44575	2.52305	2.54737	4.8419	Yes		Translation	33	3	-3.86	1	0.117
MC2R	H23	C1	2.8265	3.13035	2.756	1.91303	1.67274	1.71728	3.95012	No		GPCR ligand binding	27	2	-3.6	1	0.0997
NPPA	H25	C2	3.79887	3.42608	2.95881	2.44052	2.71642	2.58068	3.93583	No		G alpha (s) signalling events	27	2	-3.6	1	0.0997
NPR1	H23	C1	3.01217	3.09496	2.92833	2.26418	2.13362	2.00391	3.94719	No
POMC	H26	C2	3.85228	3.66735	3.18885	2.3858	2.74625	2.60458	4.0779	No
PTGER2	H23	C1	2.81386	3.08356	2.73133	1.97867	1.82523	1.91042	3.86727	Yes
TSHB	H25	C2	3.81984	3.63841	3.22252	2.20354	2.48853	2.57511	4.22214	No
TSHR	H24	C1	3.49491	3.69506	2.97041	2.39037	2.16209	2.35122	3.97118	No
VIP	H24	C1	3.68195	3.32484	2.8668	1.93617	2.45012	2.39785	3.87744	No
VIPR2	H23	C1	2.83941	3.15143	2.81942	1.96003	1.79782	1.74038	3.93371	No
CDK2	H29	C3	4.69202	3.38912	3.76753	4.51536	4.24554	3.8933	4.00647	Yes
FAU	H34	C4	3.26473	2.73649	3.27563	2.78607	3.48867	3.85183	3.04128	No
FLT3LG	H34	C4	3.15878	2.60183	3.25574	2.60709	3.56555	3.4441	2.93096	Yes
HABP4	H35	C4	2.76828	2.28106	2.8774	2.28998	4.15029	3.84997	2.42084	No
PA2G4	H30	C3	3.48519	3.00358	3.94257	3.50644	4.19076	3.88039	3.96025	Yes
PAN2	H36	C4	2.74366	2.35405	2.57024	2.41293	2.81061	3.72749	2.3827	No
RPL10L	H35	C4	2.85527	2.55738	3.02277	2.59529	3.53104	3.6783	2.69717	No
RPL11	H35	C4	3.06956	2.58759	3.11591	2.64249	3.45449	3.66672	2.82715	No
RPL18	H35	C4	3.05277	2.58923	3.16651	2.75708	3.56615	3.76972	2.84178	No
RPL19	H35	C4	2.99896	2.57142	3.14602	2.65371	3.50812	3.73813	2.80358	Yes
RPL24	H35	C4	3.10233	2.5766	3.1862	2.65749	3.49302	3.67995	2.80108	Yes
RPL28	H35	C4	2.9602	2.49813	3.21527	2.59066	3.5773	3.65416	2.77512	No
RPL29	H35	C4	2.99919	2.51889	3.23245	2.59196	3.57825	3.6082	2.78181	No
RPL30	H35	C4	3.03391	2.62248	3.20114	2.67552	3.57269	3.78167	2.86759	No
RPL31	H35	C4	3.00349	2.5986	3.14427	2.65995	3.49872	3.68902	2.79852	No
RPL34	H35	C4	2.96873	2.55384	3.22047	2.63158	3.61135	3.69814	2.80872	No
RPL35	H35	C4	2.92805	2.67886	3.05248	2.65989	3.42293	4.43189	2.73307	No
RPL35A	H35	C4	2.9241	2.51517	3.17178	2.50262	3.54352	3.76599	2.79091	No
RPL36	H35	C4	2.99242	2.55008	3.18468	2.60957	3.56464	3.73068	2.7825	No
RPL6	H35	C4	2.96672	2.5166	3.14536	2.57919	3.45006	3.64671	2.7318	No
RPS15	H35	C4	3.05123	2.60955	3.24202	2.60173	3.54826	3.74185	2.80008	Yes
RPS17	H34	C4	3.11177	2.61533	3.29899	2.68892	3.57027	3.65151	2.88479	Yes
RPS18	H35	C4	3.11673	2.58241	3.13665	2.66071	3.44854	3.64329	2.79848	Yes
RPS19	H34	C4	3.12134	2.6093	3.24985	2.68276	3.51038	3.67857	2.84916	Yes
RPS21	H34	C4	3.12528	2.63772	3.39862	2.6974	3.69773	3.73912	2.87737	Yes
RPS23	H35	C4	3.05637	2.61896	3.25367	2.60357	3.5683	3.58581	2.81413	Yes
RPS24	H34	C4	3.08498	2.63736	3.27043	2.69269	3.53597	3.60854	2.8111	Yes
RPS25	H34	C4	3.16395	2.6363	3.34954	2.70952	3.62049	3.78836	2.91571	Yes
RPS26	H29	C3	4.68531	4.14645	5	4.34726	5	5	4.13869	Yes
RPS27A	H32	C3	3.84163	3.14171	3.47856	3.10946	3.56957	3.68341	3.43089	Yes
RPS28	H34	C4	3.09913	2.63423	3.26921	2.68861	3.57991	3.68736	2.8539	Yes
RPS29	H34	C4	3.08195	2.60381	3.2333	2.67072	3.59235	3.53911	2.81979	Yes
RPS3	H34	C4	3.13886	2.63181	3.20353	2.70084	3.44795	3.63817	2.82858	Yes
RPS3A	H34	C4	3.19209	2.66303	3.28878	2.8044	3.53638	3.69645	2.89128	Yes
RPS6	H34	C4	3.11979	2.63839	3.15177	2.71167	3.45341	3.63497	2.85098	Yes
RPS7	H35	C4	3.10871	2.60413	3.19119	2.63997	3.51453	3.64747	2.80008	Yes
RPS8	H34	C4	3.12339	2.63145	3.2364	2.67128	3.55417	3.64216	2.79273	Yes
UBA52	H32	C3	3.84914	3.18033	3.43842	3.13276	3.54758	3.67647	3.46077	Yes
CALM1	H9	C1	3.59382	2.55585	2.98913	2.41659	2.55428	2.74663	2.92056	No
CCT7	H36	C4	3.53042	2.52393	3.40725	2.51672	2.93461	3.1348	2.6259	Yes
CDH1	H31	C3	4.04897	3.08417	3.48472	3.34777	3.59887	3.62889	3.37934	Yes
CDK1	H15	C3	3.96048	3.10365	2.97979	3.52888	3.33084	3.52804	3.15711	Yes
CTBP1	H6	C3	3.96536	3.13945	2.66094	3.34472	3.42751	2.89116	3.01966	Yes
CTNNB1	H31	C3	3.92655	3.02632	3.40556	3.49684	3.37837	3.23658	3.42651	Yes
EGFR	H30	C3	4.25527	3.46331	3.56632	3.71631	3.6485	3.60603	3.47943	Yes
EML4	H20	C1	3.94961	1.66625	1.83951	1.78398	1.97116	2.09476	1.88934	No
EP300	H32	C3	3.90817	2.88531	3.31553	2.9011	3.16369	3.12991	3.1792	Yes
ERBB2	H31	C3	3.83036	3.15387	3.03821	3.45809	4.18734	3.35353	3.29686	Yes
ERBB3	H29	C3	5	3.62842	3.97284	4.73317	4.45434	4.17994	4.42949	Yes
FANCC	H6	C3	3.77611	2.39087	2.85615	3.81965	3.4186	3.33532	3.22003	No
FOXP3	H15	C3	3.94032	3.15807	3.10596	3.60022	3.4581	3.1126	3.30485	Yes
GH1	H37	C4	2.77355	2.49531	3.54633	2.35548	2.76464	2.80018	2.42777	Yes
GRB2	H31	C3	4.18499	3.15357	3.52017	3.28725	3.46208	3.40351	3.4623	Yes
GTF2A2	H11	C2	4.45088	3.54011	2.30662	1.97305	2.59455	2.16464	2.87672	Yes
GTF2B	H11	C2	4.43247	3.58907	2.45034	2.27844	2.76407	2.49732	3.03639	Yes
HLA-B	H36	C4	2.7525	2.61079	3.49838	2.42598	2.95415	2.93819	2.57145	Yes
HSP90AB1	H32	C3	3.89559	3.02715	3.2977	3.04102	3.34534	3.39248	3.27305	Yes
IGF1R	H31	C3	4.06111	2.9838	3.165	3.38787	3.37937	3.21143	3.35973	Yes
IKZF1	H5	C3	4.0186	3.30302	2.85828	3.56244	3.5105	3.26206	3.24408	No
INSR	H30	C3	4.56705	3.07447	3.31353	4.18318	3.80761	3.0945	3.71093	Yes
KIR3DL2	H20	C1	0.999221	0.397523	3.77441	0.309594	0.945256	0.935319	0.657591	No
KPNA2	H32	C3	4.18529	2.8364	3.01899	2.85316	3.20593	3.25514	3.584	Yes
KRAS	H6	C3	3.92259	2.97091	2.93689	3.26777	3.19137	3.25323	3.12304	Yes
LEP	H20	C1	2.37551	1.95132	4.17406	1.835	1.87969	1.83041	2.27867	Yes
MPO	H11	C2	4.0499	2.31762	2.82732	1.97499	2.94597	2.8897	3.42822	Yes
NRAS	H6	C3	3.93432	2.96833	2.83285	3.41615	3.02278	3.23005	3.09481	Yes
NRG1	H5	C3	3.84829	3.19747	2.54976	3.75003	3.65508	3.24216	3.26236	No
PRKACA	H17	C4	3.45831	2.86838	3.21467	2.82035	3.0154	3.08922	3.16195	Yes
PRL	H20	C1	2.75973	1.81192	3.45304	1.7365	2.20081	2.13881	2.31621	Yes
PTCH1	H20	C1	4.06092	1.42148	1.35766	2.09145	1.86169	1.38495	1.91608	Yes
PTPN11	H19	C4	3.51056	2.5176	3.40953	2.98087	2.93952	2.71807	2.90504	Yes
RUNX1	H31	C3	4.23055	2.89127	3.27203	3.25991	3.28015	2.86581	3.45407	Yes
SIN3A	H5	C3	3.96621	3.30044	2.93652	3.41168	3.48093	3.15303	3.17414	No
SMAD2	H6	C3	3.52241	2.91032	3.10509	3.54364	3.24958	2.97718	3.3207	Yes
SRC	H31	C3	3.81526	3.10325	3.3219	3.47989	3.31475	3.14046	3.39628	Yes
TBP	H12	C2	4.4879	3.6008	2.77209	2.48905	2.92485	2.76316	3.1729	Yes
THADA	H2	C4	3.13802	2.59912	1.95583	3.96995	2.87437	2.84915	2.64324	No
TP53	H31	C3	4.01182	3.18617	3.35824	3.32805	3.64592	3.50015	3.42712	Yes
TPH2	H20	C1	1.76536	0.815803	3.36153	0.729648	1.05519	1.27844	0.65986	No
YAP1	H30	C3	4.59038	3.11601	3.21658	4.37656	3.69087	2.77875	3.66473	Yes
YWHAE	H14	C3	4.00017	3.61447	3.22404	3.85844	3.28186	3.76817	3.03627	No

## Sheet: Table S8.2
Table S8.2.1 Clusters in self-organising map (SupraHex analysis) of Eurpoean												Table S8.2.2 Pathway enrichment of C2 crosstalk genes
Target	Index	Cluster	Si score							Druggable		Pathway	Pathway Size	Overlap Count	Z-score	Adjusted P-value	Odds Ratio
			Ovary	Adipose	Liver	Muscle	Pancreas	Cortex	Pituitary			Cellular Senescence	10	9	4.78	0.00019	32.6
CYB5R2	H1	C4	3.15062	3.78409	3.15387	3.1164	2.86477	2.62375	3.07523	No		Cell Cycle, Mitotic	10	9	4.78	0.00019	32.6
SUOX	H37	C2	3.63861	4.40388	3.70651	3.59138	3.35358	3.1066	3.62729	No		Diseases of signal transduction by growth factor receptors and second messengers	16	14	5.95	1.7e-06	30.2
HLA-B	H11	C1	3.27174	3.19703	3.52894	2.65248	3.27745	3.40317	2.69782	Yes		Intracellular signaling by second messengers	14	12	5.36	2.4e-05	24
HLA-E	H26	C1	2.6788	2.70399	3.48941	2.03782	2.83519	2.48182	2.33271	Yes		SUMOylation	11	9	4.39	0.00055	16.2
HLA-F	H27	C5	2.38074	2.5636	3.4213	1.79455	2.68225	2.27249	2.06395	No		MAPK family signaling cascades	10	8	4.04	0.0016	13.9
KIR3DL2	H27	C5	1.41612	1.37559	3.70864	0.916789	1.61535	1.55412	1.39884	No		Signaling by Receptor Tyrosine Kinases	17	13	5.05	6.2e-05	13.3
KLRD1	H27	C5	2.30581	2.10708	3.43271	1.59485	2.23802	2.25605	2.15883	Yes		RNA Polymerase II Transcription	39	25	6.34	8.5e-08	12.7
DENND1A	H34	C4	3.79851	3.47366	1.74676	3.64496	2.69716	3.61847	2.81279	Yes		Signaling by Interleukins	13	10	4.39	0.00055	12.3
EEA1	H34	C4	3.51558	3.2364	2.07653	3.59387	2.88925	3.39322	2.4482	Yes		Cell Cycle	15	11	4.42	0.00051	10.5
GAPVD1	H34	C4	3.54514	3.05927	1.99597	3.67069	2.90775	4.00111	2.41014	No		Antiviral mechanism by IFN-stimulated genes	11	8	3.68	0.0037	9.24
GDI1	H33	C4	3.34006	3.00565	1.66607	3.45676	2.63876	3.31643	2.24739	No		Cellular response to chemical stress	11	8	3.68	0.0037	9.24
GDI2	H33	C4	3.49367	3.09929	1.76159	3.51645	2.75003	3.34475	2.26657	No		Regulation of TP53 Activity	13	9	3.73	0.0032	8
RAB35	H34	C4	3.88078	3.39437	2.22832	3.59163	3.19661	3.59099	2.84346	Yes		Transcriptional Regulation by TP53	19	12	3.97	0.0013	6.61
RAB5A	H34	C4	3.60649	3.31261	2.27454	3.58666	3.07957	3.47408	2.565	Yes		Cell Cycle Checkpoints	11	7	2.97	0.024	5.84
RAB5B	H35	C4	4.05313	3.80908	2.06597	5	3.54472	4.29947	2.95007	No		Cytokine Signaling in Immune system	26	15	4.07	0.00077	5.72
RAB5C	H34	C4	3.4382	3.21463	1.86293	3.5656	2.77415	3.49688	2.80155	Yes		DDX58/IFIH1-mediated induction of interferon-alpha/beta	10	6	2.55	0.059	4.86
RABGEF1	H33	C4	3.21538	2.89587	1.62486	3.48897	2.84656	3.29782	2.11234	Yes		Post-translational protein modification	27	14	3.4	0.0043	4.26
RIN1	H34	C4	3.66158	3.32768	1.69084	3.9163	2.95528	3.56863	2.55598	No		Factors involved in megakaryocyte development and platelet production	11	6	2.25	0.094	3.86
RIN2	H33	C4	3.09909	2.81434	0.984652	3.85513	2.64891	3.09425	1.8968	No		Interferon Signaling	18	9	2.49	0.054	3.41
RIN3	H33	C4	3.03235	2.69735	1.42523	3.44892	2.3762	2.9805	1.98251	No		Hemostasis	16	8	2.33	0.073	3.33
ADORA2A	H30	C5	2.34214	2.27068	2.25935	2.20217	1.78665	1.76513	3.73502	Yes		DNA Double-Strand Break Repair	10	5	1.8	0.2	3.12
ADRB1	H29	C5	2.28832	2.07505	2.16172	1.96436	1.56026	1.40277	3.61814	Yes		Innate Immune System	23	10	2.1	0.096	2.62
CGA	H30	C5	2.71109	2.1309	2.24237	1.99249	1.85287	1.62339	3.98452	Yes		Adaptive Immune System	14	6	1.52	0.28	2.35
CGB3	H29	C5	1.39775	1.67496	1.79718	1.40985	0.797626	0.522443	3.67033	No		DNA Repair	16	6	1.12	0.45	1.85
CGB5	H29	C5	1.5768	1.93358	2.10211	1.66477	0.942761	0.640959	3.93811	No		Developmental Biology	56	18	1.36	0.28	1.68
DRD1	H29	C5	2.23493	2.04281	2.11323	2.08976	1.56731	1.27673	3.72989	Yes		Interferon alpha/beta signaling	12	4	0.616	0.78	1.48
DRD5	H29	C5	2.16985	1.94813	2.09287	1.90879	1.44997	1.08086	3.77828	No		SARS-CoV-2 activates/modulates innate and adaptive immune responses	12	4	0.616	0.78	1.48
FSHB	H30	C5	2.78063	2.85338	3.04851	2.6838	1.89485	1.67826	5	Yes		Membrane Trafficking	18	5	0.199	0.98	1.12
FSHR	H6	C3	3.81341	2.90366	3.07268	3.10231	3.07735	2.61295	4.46449	No		Vesicle-mediated transport	18	5	0.199	0.98	1.12
GIP	H15	C3	3.53097	2.50693	2.59233	2.77725	2.56041	2.12596	3.79548	No		SARS-CoV-1-host interactions	30	8	0.114	0.98	1.05
GIPR	H29	C5	2.19372	2.01646	2.11367	1.9801	1.46321	1.1003	3.82357	No		SARS-CoV-1 Infection	30	8	0.114	0.98	1.05
GNAS	H5	C3	3.34403	2.9061	2.69436	2.79432	2.71088	2.69528	3.60025	Yes		SARS-CoV Infections	43	11	-0.0477	1	0.98
GPHA2	H30	C5	2.70946	1.90934	2.22771	2.01927	1.87513	1.47796	4.00431	No		Cellular responses to stimuli	55	14	-0.0845	1	0.968
GPHB5	H29	C5	2.64096	1.66063	1.89747	1.68585	1.81541	1.41436	3.65055	No		Infectious disease	67	16	-0.497	1	0.828
GPR119	H29	C5	2.24461	1.95458	2.12869	1.96786	1.44003	0.970322	3.85207	No		Peptide hormone metabolism	10	2	-0.436	1	0.703
HTR6	H29	C5	2.14981	1.99435	2.09013	1.9099	1.47834	1.10083	3.74104	No		Viral Infection Pathways	60	12	-1.34	1	0.589
LHCGR	H30	C5	2.73457	2.14616	2.24606	2.05579	1.7986	1.49578	3.9162	Yes		Nervous system development	44	8	-1.38	1	0.543
MC2R	H29	C5	2.18965	1.99287	2.10088	1.95707	1.45952	1.02172	3.7869	No		Signaling by GPCR	24	4	-1.12	1	0.526
NPPA	H15	C3	3.66899	2.53478	2.60935	2.9315	2.74086	2.17374	3.81451	No		SARS-CoV-2-host interactions	35	5	-1.78	1	0.401
NPR1	H14	C5	2.36524	2.33498	2.51223	2.13931	1.83668	1.85423	3.7069	No		SARS-CoV-2 Infection	35	5	-1.78	1	0.401
POMC	H15	C3	3.03743	2.79045	2.53909	2.39738	2.48405	2.16304	3.9363	No		Metabolism of RNA	40	4	-2.67	1	0.241
PTGER2	H29	C5	2.2374	2.02346	2.12753	1.93628	1.56108	1.38745	3.72448	Yes		Signaling by ROBO receptors	40	4	-2.67	1	0.241
TSHB	H30	C5	2.79352	2.20129	2.34132	2.10308	1.93961	1.73821	4.00593	No		Activation of the mRNA upon binding of the cap-binding complex and eIFs, and subsequent binding to 43S	23	2	-2.04	1	0.235
TSHR	H14	C5	2.58375	2.55181	2.15365	2.20634	2.0742	1.73315	3.73055	No		SARS-CoV-1 modulates host translation machinery	23	2	-2.04	1	0.235
VIPR2	H29	C5	2.21359	2.02885	2.09939	1.96129	1.47204	1.08283	3.78269	No		SARS-CoV-2 modulates host translation machinery	23	2	-2.04	1	0.235
CD74	H10	C1	3.07474	3.4752	3.66007	2.80447	3.82586	3.44797	2.76368	Yes		Influenza Infection	41	4	-2.76	1	0.231
FAU	H22	C1	3.41141	3.6111	3.74314	3.11516	3.67446	4.07969	2.94945	No		Metabolism of amino acids and derivatives	43	4	-2.94	1	0.213
HABP4	H25	C1	2.30009	2.38095	2.77529	2.22801	4.01759	3.80777	2.05611	No		Cellular response to starvation	39	3	-3.01	1	0.175
MED1	H9	C2	3.71122	3.41891	3.39488	3.06674	3.70934	3.55599	3.09036	No		Eukaryotic Translation Elongation	39	3	-3.01	1	0.175
NR0B1	H21	C2	3.86435	3.13157	3.58849	3.30006	3.6575	3.40081	3.60727	No		Eukaryotic Translation Initiation	39	3	-3.01	1	0.175
PA2G4	H23	C1	3.08699	3.01315	3.92267	2.79014	3.84923	3.69731	2.69782	Yes		Nonsense-Mediated Decay (NMD)	39	3	-3.01	1	0.175
QARS1	H3	C1	3.05073	3.58272	2.98638	2.94852	3.68646	3.35782	2.64768	Yes		Regulation of expression of SLITs and ROBOs	39	3	-3.01	1	0.175
RPL11	H23	C1	3.16005	3.22365	3.39803	2.87222	3.49406	3.80096	2.71321	No		Response of EIF2AK4 (GCN2) to amino acid deficiency	39	3	-3.01	1	0.175
RPL18	H24	C1	3.07937	3.09787	3.47445	2.8682	3.54859	3.79743	2.70434	No		rRNA processing	39	3	-3.01	1	0.175
RPL18A	H24	C1	3.00225	3.02868	3.44077	2.76787	3.55981	3.69949	2.60861	No		Selenoamino acid metabolism	39	3	-3.01	1	0.175
RPL19	H24	C1	3.03174	3.17896	3.44699	2.80614	3.68927	3.83136	2.64007	Yes		SRP-dependent cotranslational protein targeting to membrane	39	3	-3.01	1	0.175
RPL28	H25	C1	2.80579	2.87498	3.42752	2.66724	3.53954	3.69915	2.52333	No		Translation	39	3	-3.01	1	0.175
RPL29	H25	C1	2.86939	2.93169	3.41557	2.68601	3.53412	3.6472	2.5314	No
RPL30	H23	C1	3.12151	3.14673	3.55719	2.84574	3.66875	3.88706	2.75758	No
RPL31	H24	C1	3.05018	3.10775	3.3857	2.80387	3.56067	3.76566	2.66503	No
RPL34	H24	C1	2.88534	2.9722	3.50623	2.73924	3.60413	3.78181	2.58536	No
RPL35	H23	C1	3.07052	3.13225	3.35476	2.79067	3.50132	4.51591	2.54572	No
RPL35A	H24	C1	2.90489	2.95469	3.47665	2.71057	3.57693	3.83931	2.5479	No
RPL36	H24	C1	2.98763	3.02084	3.47544	2.76832	3.59037	3.81538	2.64896	No
RPL38	H24	C1	3.04839	3.02815	3.42357	2.8086	3.54338	3.69496	2.70414	No
RPL5	H24	C1	3.03303	3.0806	3.36339	2.76275	3.46048	3.79531	2.56685	No
RPL8	H23	C1	3.17101	3.35714	3.57047	2.87089	3.47491	3.90152	2.61245	Yes
RPS10	H24	C1	2.98257	3.08183	3.35019	2.77612	3.50905	3.68249	2.54256	Yes
RPS11	H23	C1	3.21855	3.29888	3.53682	2.94417	3.58196	3.8127	2.76947	Yes
RPS15	H23	C1	3.1104	3.14603	3.66049	2.8489	3.66846	3.94336	2.6832	Yes
RPS16	H23	C1	3.16451	3.24512	3.49203	2.90603	3.5403	3.76104	2.71626	Yes
RPS17	H23	C1	3.07125	3.19146	3.53492	2.91961	3.61679	3.78647	2.76711	Yes
RPS18	H23	C1	3.18317	3.25288	3.5262	2.93242	3.55481	3.85747	2.7536	Yes
RPS19	H23	C1	3.12214	3.24693	3.51713	2.9435	3.59776	3.84447	2.78518	Yes
RPS2	H10	C1	3.31529	3.2704	3.49061	2.94318	3.56582	3.76737	2.79009	Yes
RPS21	H23	C1	3.20337	3.14155	3.80691	2.90194	3.77398	3.86718	2.80141	Yes
RPS23	H22	C1	3.23649	3.30659	3.67523	2.99812	3.73773	3.84696	2.86415	Yes
RPS24	H23	C1	3.11071	3.22847	3.54402	2.91994	3.58675	3.78713	2.74213	Yes
RPS25	H23	C1	3.08377	3.10471	3.61179	2.8396	3.66333	3.89748	2.70418	Yes
RPS26	H20	C2	4.46785	4.41961	5	4.54056	5	5	4.00174	Yes
RPS27A	H21	C2	3.95947	3.91947	3.59839	3.36276	3.89734	4.02108	3.23761	Yes
RPS28	H23	C1	3.15822	3.26923	3.65388	2.97576	3.66298	3.82872	2.84114	Yes
RPS29	H24	C1	3.07783	3.04673	3.49665	2.78389	3.61134	3.61947	2.67708	Yes
RPS3	H23	C1	3.1567	3.28104	3.44266	2.92089	3.53441	3.80711	2.70421	Yes
RPS3A	H10	C1	3.194	3.33991	3.50262	2.99754	3.68198	3.78134	2.7837	Yes
RPS6	H10	C1	3.21088	3.28544	3.42244	2.96088	3.55689	3.78657	2.7753	Yes
RPS7	H22	C1	3.20605	3.50982	3.69257	3.05641	3.56492	3.89715	2.70846	Yes
RPS8	H23	C1	3.08599	3.2352	3.48459	2.90101	3.55353	3.74267	2.70914	Yes
RPS9	H24	C1	3.10794	3.21244	3.43642	2.88647	3.51254	3.74299	2.69354	Yes
UBA52	H21	C2	3.93013	3.83268	3.58891	3.25649	3.84998	3.98092	3.18891	Yes
AFF4	H27	C5	4.09801	2.77722	2.88976	0.862163	0.924947	1.03235	1.07121	Yes
APP	H21	C2	4.06357	3.90714	3.42955	3.2344	3.6881	3.73797	3.23351	Yes
AR	H19	C2	3.78684	3.77617	3.01876	3.41344	3.82249	3.16667	3.1841	Yes
BRCA1	H7	C4	4.10973	3.66044	3.09802	3.4207	3.21476	3.30374	3.08831	Yes
CDK1	H8	C2	4.07844	3.78454	3.04035	3.66905	3.65958	3.8982	3.17129	Yes
CDK2	H36	C2	3.69962	3.87541	2.99207	3.98255	3.23848	3.47719	3.67347	Yes
CDK9	H1	C4	3.93616	3.19704	3.20483	2.66538	2.86028	2.94474	2.59848	Yes
CHD4	H7	C4	3.64396	4.14236	2.53915	3.2646	3.71775	2.89224	2.92506	Yes
CHEK2	H17	C4	4.19626	3.07892	2.71522	4.19356	3.03242	2.41508	3.4819	Yes
COMMD7	H26	C1	2.48358	3.54525	3.41374	3.36301	1.76502	3.60222	1.29818	No
CTNNB1	H21	C2	4.03261	3.71602	3.3367	3.41338	3.75324	3.72844	3.43997	Yes
CYCS	H2	C2	3.4205	4.0227	3.11556	3.04185	3.52402	3.36595	2.92588	Yes
DNMT3B	H36	C2	3.76854	3.75681	2.80422	3.63943	3.39967	3.76486	3.10896	Yes
EGFR	H20	C2	4.25925	4.17458	3.33784	3.73673	3.92183	3.97529	3.45343	Yes
ELAVL1	H19	C2	4.17851	3.80679	2.97736	3.24462	3.49934	3.75994	2.86339	Yes
EP300	H20	C2	4.56646	4.40137	3.51027	4.01507	4.24577	3.87352	3.60508	Yes
ERBB3	H20	C2	4.73113	3.83488	3.60172	4.32816	4.48141	4.23482	4.15782	Yes
ERBB4	H36	C2	3.99165	3.32162	2.87507	3.95913	3.65176	3.28394	4.12647	Yes
ETHE1	H1	C4	3.15675	3.97473	3.28503	3.10403	2.91267	2.72799	3.03866	No
FANCC	H16	C3	3.62222	2.80151	2.52554	3.50506	2.36838	2.26851	3.122	No
FGF9	H6	C3	3.7667	2.96314	2.54099	3.43439	3.2896	2.79148	3.51183	Yes
FOXP3	H19	C2	3.96683	3.95014	2.99337	3.23296	3.62245	3.02434	3.44903	Yes
GATA4	H20	C2	5	3.68207	3.63985	4.15228	4.10108	3.33704	4.65863	No
GSDMD	H4	C1	2.66509	3.86677	2.24824	3.00856	3.83277	1.79734	2.35451	Yes
H2AX	H17	C4	3.97887	3.39205	2.64546	3.0805	2.88466	2.80031	2.7165	No
H3C12	H19	C2	3.99052	3.60848	3.24399	3.46281	3.56041	3.40818	3.0452	No
H3C13	H2	C2	3.9953	3.6128	3.22988	3.28259	3.4872	3.39297	2.97003	Yes
HDAC1	H19	C2	3.87504	4.06589	3.07698	3.40991	3.7848	3.32946	3.09116	Yes
HDAC2	H37	C2	3.98976	4.23229	3.15954	3.56218	4.08144	3.39133	3.31687	No
IFNA10	H4	C1	2.60995	3.83211	2.21892	3.14392	3.70273	2.00959	2.34252	No
IFNA21	H4	C1	2.60979	3.76866	2.21319	3.12272	3.63048	2.0216	2.34371	No
IFNA7	H4	C1	2.59568	3.78798	2.20309	3.11944	3.6506	1.99754	2.33417	No
IRF1	H37	C2	3.93738	5	3.1317	4.45372	4.83569	3.05735	3.54595	No
ISG15	H3	C1	3.2395	3.91811	3.05885	3.13801	3.86762	3.34662	2.68929	Yes
JAK1	H1	C4	3.39043	3.90778	2.82394	3.30063	3.66834	2.91549	2.92476	Yes
JUN	H8	C2	3.92842	4.05185	3.25339	3.38912	3.76876	3.60734	3.06595	Yes
KEAP1	H7	C4	3.71197	3.94151	2.61048	3.42459	3.42929	3.04831	2.47498	Yes
KPNA2	H19	C2	4.09858	3.87839	2.94381	3.39762	3.70105	3.11919	3.47751	Yes
LIG3	H32	C3	4.11624	3.41203	1.93315	3.51435	2.5947	2.57261	2.69922	Yes
MAPRE1	H20	C2	4.28914	3.71626	3.1686	4.09626	4.29126	4.40501	3.84076	Yes
MDM2	H8	C2	3.86316	4.10513	3.21968	3.53107	3.78476	3.34472	3.06805	Yes
MESP1	H31	C3	3.8828	2.08524	2.45214	2.99756	2.64137	1.77827	3.64967	No
NEIL2	H33	C4	4.19015	3.43517	1.7025	3.9834	2.82914	2.37888	2.60154	No
NFKB1	H8	C2	4.02112	4.37973	3.44688	3.4683	3.6872	3.67816	2.91999	Yes
NPM1	H9	C2	3.72323	3.61527	3.10798	3.16122	3.77569	3.55575	2.99695	Yes
NRF1	H2	C2	4.04625	3.87287	3.27947	3.17259	3.42659	3.54486	2.95215	No
OGG1	H32	C3	3.94879	3.14376	1.78665	3.36098	2.36064	2.35785	2.31959	Yes
PNKP	H32	C3	4.01641	3.16651	1.97955	3.36873	2.56257	2.50804	2.50212	No
RAD50	H32	C3	4.06755	4.07803	1.75114	3.12746	1.85941	1.86463	3.339	Yes
REL	H1	C4	3.2992	3.78914	2.67361	3.1722	3.44835	3.0043	2.5523	No
RELA	H8	C2	3.83264	4.20305	3.47865	3.36429	3.64679	3.65414	2.9007	Yes
SIN3A	H7	C4	3.64101	3.67265	2.86156	3.31923	3.69388	2.99093	3.06418	No
SMARCA4	H19	C2	4.00465	4.07506	2.91315	3.46738	3.77835	3.30864	3.25338	Yes
SRC	H8	C2	3.98269	3.58907	3.2482	3.37252	3.61094	3.64339	3.33129	Yes
STAT1	H8	C2	3.75933	4.04199	3.30187	3.54791	3.83837	3.36491	3.05802	Yes
STAT3	H19	C2	3.73943	4.0087	3.08826	3.43644	3.7694	3.47514	3.11337	Yes
TP53	H20	C2	4.26388	4.06094	3.38649	3.66081	3.83922	3.83218	3.33322	Yes
XRCC1	H33	C4	4.23265	3.40958	2.20443	3.51304	2.69897	2.70115	2.67859	Yes
YAP1	H36	C2	4.1037	3.50262	3.04826	4.24886	3.82018	2.79411	3.6347	Yes
YWHAE	H18	C4	3.94657	3.58749	2.71286	3.46629	3.31768	3.70649	2.89753	No
ZBTB16	H36	C2	3.94362	3.07725	2.95576	4.06607	3.7237	2.9204	3.71023	Yes
