# Supplementary material for: Evidence-based genetic variants to gene mapping and prioritization uncovers distinct molecular pathophysiology and therapeutic landscape in polycystic ovary syndrome patients of different ethnicities.
Source: Research Square preprint supplement (doi:10.21203/rs.3.rs-8610143/v1), 2026-01-22
Supplement: Supplementary file 4 [file 4562491c78f278f5c6dad8d5.xlsx]

## Sheet: Table S3.1
Table S3.1.1 Enrichment of Reactome pathways among ovary-prioritized genes and their first‑degree neighbors in East Asian and European
Pathway	Number of genes annoted for the pathway	Number of pathway genes within top 100 prioritized genes				Number of genes which are the first degree neighbors of the pathway	Number of overlap of neighbors within top 100 prioritized genes
		EAS genes	EAS adj p-value	EUR genes	EUR adj p-value		EAS genes	EAS adj p-value	EUR genes	EUR adj p-value
Androgen biosynthesis	11	2	0.00264467	0	1	223	19	2.06766e-16	11	1.38356e-07
Cytokine Signaling in Immune system	792	25	4.63828e-12	24	3.31861e-11	10450	65	0.172374	70	0.0263447
Translocation of SLC2A4 (GLUT4) to the plasma membrane	72	2	0.0789577	3	0.0101702	3770	57	6.85869e-14	63	1.76556e-18
Interleukin-1 family signaling	152	5	0.00264467	8	5.20283e-06	6392	67	1.25407e-09	78	9.34228e-17
Interleukin-6 family signaling	24	1	0.147323	2	0.0101702	1205	39	6.9972e-19	47	4.46397e-27
Inflammasome	21	2	0.00847804	4	1.00164e-05	3675	51	7.47851e-11	66	1.8015e-21
Innate immune system	1125	22	5.3446e-07	18	0.00010175	10627	66	0.172374	78	0.000296056
Signaling by Insulin receptor	82	11	3.98168e-12	2	0.0857353	3100	50	7.07253e-13	62	6.20073e-22
Table S3.1.2 Enrichment of HPO phenotypes among ovary-prioritized genes and their first‑degree neighbors in East Asian and European
Phenotype	Number of genes annoted for the phenotype	Number of phenotype genes within top 100 prioritized genes				Number of genes which are the first degree neighbors of the phenotype	Number of overlap of neighbors within top 100 prioritized genes
		EAS genes	EAS adj p-value	EUR genes	EUR adj p-value		EAS genes	EAS adj p-value	EUR genes	EUR adj p-value
Insulin resistance	107	3	0.0294924	2	0.152832	3435	62	9.93725e-20	87	7.19432e-47
Glucose intolerance	496	12	4.40261e-05	12	4.40016e-05	8345	74	1.65175e-07	84	1.02189e-13

## Sheet: Table S3.2
Table S3.2 Prioritized inflammasome genes and first neighbors
East Asian				European
Gene (Source node)	Ovary Si rank	Ovary Si rating	First neighbor gene(s) with rank and score	Gene (Source node)	Ovary Si rank	Ovary Si rating	First neighbor gene(s) with rank and score
HSP90AB1	47	3.89559	ERBB3 @ 1 (5), CDK2 @ 3 (4.692024128), RPS26 @ 4 (4.685311238), EGFR @ 18 (4.255273461), KPNA2 @ 20 (4.185288434), GRB2 @ 21 (4.184991908), IGF1R @ 23 (4.061111546), TP53 @ 29 (4.011818792), YWHAE @ 31 (4.000171791), CDK1 @ 36 (3.960479767), CTNNB1 @ 42 (3.926547961), EP300 @ 44 (3.908165976), GRK2 @ 45 (3.906377942), RPS27A @ 64 (3.841632945), TERF1 @ 65 (3.835912394), ERBB2 @ 67 (3.830356053), …	APP	20	4.06357	RPS26 @ 4 (4.467848456), MAPRE1 @ 6 (4.289142824), EGFR @ 8 (4.259252678), CHEK2 @ 10 (4.196264648), LIG3 @ 13 (4.116238444), KPNA2 @ 16 (4.098579501), CDK1 @ 18 (4.078436677), CTNNB1 @ 23 (4.032609254), NFKB1 @ 24 (4.021122149), PNKP @ 26 (4.016412119), SRC @ 32 (3.98269232), RPS27A @ 35 (3.95946954), JUN @ 42 (3.928420791), RAB35 @ 44 (3.880783612), MDM2 @ 47 (3.863162591), FEN1 @ 57 (3.8169979…
APP	91	3.74579	RPS26 @ 4 (4.685311238), TBPL1 @ 9 (4.587803787), RAB35 @ 17 (4.272343404), EGFR @ 18 (4.255273461), KPNA2 @ 20 (4.185288434), GRB2 @ 21 (4.184991908), PAPSS2 @ 22 (4.109209196), IGF1R @ 23 (4.061111546), ETHE1 @ 35 (3.964977825), CDK1 @ 36 (3.960479767), CTNNB1 @ 42 (3.926547961), KRAS @ 43 (3.922588159), POMC @ 56 (3.852283734), PIK3R2 @ 57 (3.849769814), RPS27A @ 64 (3.841632945), NPM1 @ 70 (3…	NFKB1	24	4.02112	EP300 @ 3 (4.566455535), TP53 @ 7 (4.263878027), EGFR @ 8 (4.259252678), ELAVL1 @ 12 (4.178507033), BRCA1 @ 14 (4.109727894), KPNA2 @ 16 (4.098579501), CDK1 @ 18 (4.078436677), RAD50 @ 19 (4.067545896), APP @ 20 (4.06357256), CTNNB1 @ 23 (4.032609254), HDAC2 @ 31 (3.989763953), SRC @ 32 (3.98269232), FOXP3 @ 34 (3.966832631), IRF1 @ 39 (3.937384347), CDK9 @ 40 (3.936164117), UBA52 @ 41 (3.9301250…
RELA	118	3.63481	YAP1 @ 8 (4.590383402), TBP @ 13 (4.487899762), GTF2B @ 15 (4.432465953), EGFR @ 18 (4.255273461), KPNA2 @ 20 (4.185288434), TP53 @ 29 (4.011818792), SIN3A @ 33 (3.966211795), ETHE1 @ 35 (3.964977825), FOXP3 @ 40 (3.94032475), CTNNB1 @ 42 (3.926547961), EP300 @ 44 (3.908165976), MUC1 @ 46 (3.897446897), HSP90AB1 @ 47 (3.89559168), RPS27A @ 64 (3.841632945), CLTC @ 68 (3.829350917), NPM1 @ 70 (3.8…	RELA	55	3.83264	EP300 @ 3 (4.566455535), TP53 @ 7 (4.263878027), EGFR @ 8 (4.259252678), BRCA1 @ 14 (4.109727894), YAP1 @ 15 (4.103703234), KPNA2 @ 16 (4.098579501), NRF1 @ 22 (4.046253517), CTNNB1 @ 23 (4.032609254), NFKB1 @ 24 (4.021122149), H3C13 @ 28 (3.995298939), H3C12 @ 30 (3.990523587), HDAC2 @ 31 (3.989763953), FOXP3 @ 34 (3.966832631), RPS27A @ 35 (3.95946954), IRF1 @ 39 (3.937384347), CDK9 @ 40 (3.936…
NFKB1	246	3.35423	EGFR @ 18 (4.255273461), KPNA2 @ 20 (4.185288434), GNAS @ 27 (4.026244404), TP53 @ 29 (4.011818792), SIN3A @ 33 (3.966211795), CDK1 @ 36 (3.960479767), FOXP3 @ 40 (3.94032475), NRAS @ 41 (3.934319021), CTNNB1 @ 42 (3.926547961), KRAS @ 43 (3.922588159), EP300 @ 44 (3.908165976), HSP90AB1 @ 47 (3.89559168), HRAS @ 55 (3.85675947), UBA52 @ 58 (3.849143067), ERBB2 @ 67 (3.830356053), CLTC @ 68 (3.82…	HSP90AB1	77	3.72518	ERBB3 @ 2 (4.731127927), EP300 @ 3 (4.566455535), RPS26 @ 4 (4.467848456), MAPRE1 @ 6 (4.289142824), TP53 @ 7 (4.263878027), EGFR @ 8 (4.259252678), KPNA2 @ 16 (4.098579501), CDK1 @ 18 (4.078436677), CTNNB1 @ 23 (4.032609254), NFKB1 @ 24 (4.021122149), H3C13 @ 28 (3.995298939), ERBB4 @ 29 (3.99164713), H3C12 @ 30 (3.990523587), SRC @ 32 (3.98269232), RPS27A @ 35 (3.95946954), YWHAE @ 37 (3.946570…
BCL2	620	2.98791	CDK2 @ 3 (4.692024128), TP53 @ 29 (4.011818792), CDK1 @ 36 (3.960479767), FOXP3 @ 40 (3.94032475), NRAS @ 41 (3.934319021), KRAS @ 43 (3.922588159), EP300 @ 44 (3.908165976), HRAS @ 55 (3.85675947), CYCS @ 81 (3.787614979), STAT3 @ 92 (3.744179493)	BCL2	785	2.90048	EP300 @ 3 (4.566455535), TP53 @ 7 (4.263878027), BRCA1 @ 14 (4.109727894), CDK1 @ 18 (4.078436677), NFKB1 @ 24 (4.021122149), H3C13 @ 28 (3.995298939), H3C12 @ 30 (3.990523587), FOXP3 @ 34 (3.966832631), H3-3B @ 54 (3.833825465), RELA @ 55 (3.832644555), MYC @ 56 (3.825986802), PRKACA @ 69 (3.762362936), STAT3 @ 75 (3.739433125), AKT1 @ 82 (3.716718023), KEAP1 @ 83 (3.711971154), HSP90AA1 @ 87 (3…
BCL2L1	836	2.86085	IKZF3 @ 16 (4.29678545), TP53 @ 29 (4.011818792), CDK1 @ 36 (3.960479767), CTNNB1 @ 42 (3.926547961), KRAS @ 43 (3.922588159), CYCS @ 81 (3.787614979), STAT3 @ 92 (3.744179493)	AIM2	1098	2.72125	XRCC1 @ 9 (4.232647006), LIG3 @ 13 (4.116238444), RAD50 @ 19 (4.067545896), HDAC2 @ 31 (3.989763953), JUN @ 42 (3.928420791), HDAC1 @ 45 (3.875037284), NBN @ 68 (3.766088409), TP53BP1 @ 78 (3.725074195), XRCC6 @ 80 (3.718531754)
NLRP1	1109	2.75085	PTCH1 @ 24 (4.060915524)	BCL2L1	1109	2.7134	TP53 @ 7 (4.263878027), CDK1 @ 18 (4.078436677), CTNNB1 @ 23 (4.032609254), MDM2 @ 47 (3.863162591), RELA @ 55 (3.832644555), STAT3 @ 75 (3.739433125), AKT1 @ 82 (3.716718023), KEAP1 @ 83 (3.711971154)
PSTPIP1	1199	2.717	RPS26 @ 4 (4.685311238)	TXNIP	1310	2.61728	TP53 @ 7 (4.263878027), ELAVL1 @ 12 (4.178507033), KPNA2 @ 16 (4.098579501), ZBTB16 @ 38 (3.943619187), HDAC1 @ 45 (3.875037284), HSP90AB1 @ 77 (3.725182879)
TXNIP	1230	2.70362	KPNA2 @ 20 (4.185288434), TP53 @ 29 (4.011818792), HSP90AB1 @ 47 (3.89559168)	TXN	1675	2.4592	EP300 @ 3 (4.566455535), TP53 @ 7 (4.263878027), EGFR @ 8 (4.259252678), NFKB1 @ 24 (4.021122149), MYC @ 56 (3.825986802), TRAF6 @ 60 (3.802540496), HSP90AB1 @ 77 (3.725182879), NPM1 @ 79 (3.723229211), AKT1 @ 82 (3.716718023), HSP90AA1 @ 87 (3.706481498), CDK2 @ 89 (3.699623682)
AIM2	1340	2.65034	IKZF5 @ 39 (3.94821257)	NFKB2	1712	2.43882	TP53 @ 7 (4.263878027), NFKB1 @ 24 (4.021122149), SMARCA4 @ 27 (4.004652833), HDAC1 @ 45 (3.875037284), RELA @ 55 (3.832644555), TRAF6 @ 60 (3.802540496), SIRT1 @ 61 (3.802094612), STAT3 @ 75 (3.739433125), HSP90AB1 @ 77 (3.725182879), HSP90AA1 @ 87 (3.706481498), ESR1 @ 95 (3.677494751), CLTC @ 98 (3.665966184)
TXN	1611	2.51071	CDK2 @ 3 (4.692024128), EGFR @ 18 (4.255273461), TP53 @ 29 (4.011818792), EP300 @ 44 (3.908165976), HSP90AB1 @ 47 (3.89559168), NPM1 @ 70 (3.818434018), CYCS @ 81 (3.787614979), INS @ 94 (3.741981928)	CASP1	1936	2.35714	TP53 @ 7 (4.263878027), EGFR @ 8 (4.259252678), NFKB1 @ 24 (4.021122149), AR @ 64 (3.786837043), KEAP1 @ 83 (3.711971154)
CASP1	1628	2.50276	EGFR @ 18 (4.255273461), TP53 @ 29 (4.011818792)	NLRP3	2738	2.08089	NFKB1 @ 24 (4.021122149), RELA @ 55 (3.832644555), HSP90AB1 @ 77 (3.725182879), HSP90AA1 @ 87 (3.706481498)
MEFV	1674	2.48761	YWHAE @ 31 (4.000171791)	PSTPIP1	2820	2.05777	RPS26 @ 4 (4.467848456)
NLRP3	1860	2.41225	HSP90AB1 @ 47 (3.89559168), CBX5 @ 60 (3.848006823)	PYCARD	2846	2.04812	LIG3 @ 13 (4.116238444)
NFKB2	2338	2.26169	TP53 @ 29 (4.011818792), SIN3A @ 33 (3.966211795), HSP90AB1 @ 47 (3.89559168), CLTC @ 68 (3.829350917), STAT3 @ 92 (3.744179493)	HMOX1	3630	1.81845	ELAVL1 @ 12 (4.178507033), STAT3 @ 75 (3.739433125), AKT1 @ 82 (3.716718023)
HMOX1	2845	2.12431	TERF1 @ 65 (3.835912394), STAT3 @ 92 (3.744179493)	MEFV	3817	1.77723	YWHAE @ 37 (3.946570154), RELA @ 55 (3.832644555)
NLRC4	3259	2.03048	TP53 @ 29 (4.011818792)	NLRC4	5794	1.33755	TP53 @ 7 (4.263878027)
SUGT1	5452	1.61651	HSP90AB1 @ 47 (3.89559168)	SUGT1	5954	1.3075	HSP90AB1 @ 77 (3.725182879), HSP90AA1 @ 87 (3.706481498)
P2RX7	10264	0.907287	GRB2 @ 21 (4.184991908)	P2RX7	10308	0.506451	GRB2 @ 65 (3.770730971)

## Sheet: Table S3.3
Table S3.3 Prioritized innate immune system genes and first neighbors
East Asian				European
Gene (Source node)	Ovary Si rank	Ovary Si rating	First neighbor gene(s) with rank and score	Gene (Source node)	Ovary Si rank	Ovary Si rating	First neighbor gene(s) with rank and score
GRB2	21	4.18499	ERBB3 @ 1 (5), RPS26 @ 4 (4.685311238), INSR @ 10 (4.567054143), IKZF3 @ 16 (4.29678545), EGFR @ 18 (4.255273461), KPNA2 @ 20 (4.185288434), IGF1R @ 23 (4.061111546), TP53 @ 29 (4.011818792), YWHAE @ 31 (4.000171791), EML4 @ 38 (3.949610242), NRAS @ 41 (3.934319021), KRAS @ 43 (3.922588159), EP300 @ 44 (3.908165976), MUC1 @ 46 (3.897446897), HSP90AB1 @ 47 (3.89559168), PIK3CA @ 49 (3.87790566), H…	EP300	3	4.56646	GATA4 @ 1 (5), RPS26 @ 4 (4.467848456), MAPRE1 @ 6 (4.289142824), TP53 @ 7 (4.263878027), NEIL2 @ 11 (4.190148977), BRCA1 @ 14 (4.109727894), YAP1 @ 15 (4.103703234), KPNA2 @ 16 (4.098579501), CDK1 @ 18 (4.078436677), RAD50 @ 19 (4.067545896), CTNNB1 @ 23 (4.032609254), NFKB1 @ 24 (4.021122149), SMARCA4 @ 27 (4.004652833), H3C13 @ 28 (3.995298939), H3C12 @ 30 (3.990523587), HDAC2 @ 31 (3.98976395…
MPO	25	4.0499	RUNX1 @ 19 (4.230547681)	TP53	7	4.26388	EP300 @ 3 (4.566455535), RPS26 @ 4 (4.467848456), EGFR @ 8 (4.259252678), XRCC1 @ 9 (4.232647006), CHEK2 @ 10 (4.196264648), ELAVL1 @ 12 (4.178507033), BRCA1 @ 14 (4.109727894), KPNA2 @ 16 (4.098579501), CDK1 @ 18 (4.078436677), RAD50 @ 19 (4.067545896), NFKB1 @ 24 (4.021122149), SMARCA4 @ 27 (4.004652833), ERBB4 @ 29 (3.99164713), H3C12 @ 30 (3.990523587), HDAC2 @ 31 (3.989763953), SRC @ 32 (3.9…
TP53	29	4.01182	CDK2 @ 3 (4.692024128), RPS26 @ 4 (4.685311238), TBP @ 13 (4.487899762), EGFR @ 18 (4.255273461), RUNX1 @ 19 (4.230547681), KPNA2 @ 20 (4.185288434), GRB2 @ 21 (4.184991908), IGF1R @ 23 (4.061111546), GNAS @ 27 (4.026244404), YWHAE @ 31 (4.000171791), SIN3A @ 33 (3.966211795), CTBP1 @ 34 (3.965358784), ETHE1 @ 35 (3.964977825), CDK1 @ 36 (3.960479767), EP300 @ 44 (3.908165976), GRK2 @ 45 (3.90637…	APP	20	4.06357	RPS26 @ 4 (4.467848456), MAPRE1 @ 6 (4.289142824), EGFR @ 8 (4.259252678), CHEK2 @ 10 (4.196264648), LIG3 @ 13 (4.116238444), KPNA2 @ 16 (4.098579501), CDK1 @ 18 (4.078436677), CTNNB1 @ 23 (4.032609254), NFKB1 @ 24 (4.021122149), PNKP @ 26 (4.016412119), SRC @ 32 (3.98269232), RPS27A @ 35 (3.95946954), JUN @ 42 (3.928420791), RAB35 @ 44 (3.880783612), MDM2 @ 47 (3.863162591), FEN1 @ 57 (3.8169979…
NRAS	41	3.93432	ERBB3 @ 1 (5), EGFR @ 18 (4.255273461), RUNX1 @ 19 (4.230547681), GRB2 @ 21 (4.184991908), IGF1R @ 23 (4.061111546), GNAS @ 27 (4.026244404), EML4 @ 38 (3.949610242), CTNNB1 @ 42 (3.926547961), KRAS @ 43 (3.922588159), PIK3CA @ 49 (3.87790566), HRAS @ 55 (3.85675947), PIK3R2 @ 57 (3.849769814), ERBB2 @ 67 (3.830356053), NPM1 @ 70 (3.818434018), SRC @ 72 (3.815262485), YWHAB @ 75 (3.807771122), PI…	RAB5B	21	4.05313	ELAVL1 @ 12 (4.178507033), CDK1 @ 18 (4.078436677), RAB7A @ 91 (3.694059873), RIN1 @ 100 (3.661582788)
CTNNB1	42	3.92655	ERBB3 @ 1 (5), CDK2 @ 3 (4.692024128), YAP1 @ 8 (4.590383402), EGFR @ 18 (4.255273461), IGF1R @ 23 (4.061111546), CDH1 @ 26 (4.048973937), CTBP1 @ 34 (3.965358784), CDK1 @ 36 (3.960479767), NRAS @ 41 (3.934319021), KRAS @ 43 (3.922588159), EP300 @ 44 (3.908165976), MUC1 @ 46 (3.897446897), HSP90AB1 @ 47 (3.89559168), PIK3CA @ 49 (3.87790566), HRAS @ 55 (3.85675947), RPS27A @ 64 (3.841632945), ERB…	CTNNB1	23	4.03261	ERBB3 @ 2 (4.731127927), EP300 @ 3 (4.566455535), MAPRE1 @ 6 (4.289142824), EGFR @ 8 (4.259252678), ELAVL1 @ 12 (4.178507033), BRCA1 @ 14 (4.109727894), YAP1 @ 15 (4.103703234), CDK1 @ 18 (4.078436677), APP @ 20 (4.06357256), NFKB1 @ 24 (4.021122149), SMARCA4 @ 27 (4.004652833), H3C13 @ 28 (3.995298939), H3C12 @ 30 (3.990523587), HDAC2 @ 31 (3.989763953), SRC @ 32 (3.98269232), RPS27A @ 35 (3.959…
KRAS	43	3.92259	ERBB3 @ 1 (5), EGFR @ 18 (4.255273461), GRB2 @ 21 (4.184991908), IGF1R @ 23 (4.061111546), CDH1 @ 26 (4.048973937), GNAS @ 27 (4.026244404), CDK1 @ 36 (3.960479767), EML4 @ 38 (3.949610242), NRAS @ 41 (3.934319021), CTNNB1 @ 42 (3.926547961), EP300 @ 44 (3.908165976), PIK3CA @ 49 (3.87790566), HRAS @ 55 (3.85675947), PIK3R2 @ 57 (3.849769814), ERBB2 @ 67 (3.830356053), NPM1 @ 70 (3.818434018), SR…	NFKB1	24	4.02112	EP300 @ 3 (4.566455535), TP53 @ 7 (4.263878027), EGFR @ 8 (4.259252678), ELAVL1 @ 12 (4.178507033), BRCA1 @ 14 (4.109727894), KPNA2 @ 16 (4.098579501), CDK1 @ 18 (4.078436677), RAD50 @ 19 (4.067545896), APP @ 20 (4.06357256), CTNNB1 @ 23 (4.032609254), HDAC2 @ 31 (3.989763953), SRC @ 32 (3.98269232), FOXP3 @ 34 (3.966832631), IRF1 @ 39 (3.937384347), CDK9 @ 40 (3.936164117), UBA52 @ 41 (3.9301250…
EP300	44	3.90817	CDK2 @ 3 (4.692024128), RPS26 @ 4 (4.685311238), YAP1 @ 8 (4.590383402), TBP @ 13 (4.487899762), GTF2B @ 15 (4.432465953), RUNX1 @ 19 (4.230547681), KPNA2 @ 20 (4.185288434), GRB2 @ 21 (4.184991908), CDH1 @ 26 (4.048973937), TP53 @ 29 (4.011818792), SIN3A @ 33 (3.966211795), CTBP1 @ 34 (3.965358784), CDK1 @ 36 (3.960479767), FOXP3 @ 40 (3.94032475), CTNNB1 @ 42 (3.926547961), KRAS @ 43 (3.9225881…	SRC	32	3.98269	ERBB3 @ 2 (4.731127927), EP300 @ 3 (4.566455535), TP53 @ 7 (4.263878027), EGFR @ 8 (4.259252678), LIG3 @ 13 (4.116238444), BRCA1 @ 14 (4.109727894), YAP1 @ 15 (4.103703234), CDK1 @ 18 (4.078436677), APP @ 20 (4.06357256), NRF1 @ 22 (4.046253517), CTNNB1 @ 23 (4.032609254), NFKB1 @ 24 (4.021122149), ERBB4 @ 29 (3.99164713), YWHAE @ 37 (3.946570154), JUN @ 42 (3.928420791), MDM2 @ 47 (3.863162591),…
MUC1	46	3.89745	ERBB3 @ 1 (5), TBP @ 13 (4.487899762), EGFR @ 18 (4.255273461), GRB2 @ 21 (4.184991908), TP53 @ 29 (4.011818792), CTNNB1 @ 42 (3.926547961), ERBB2 @ 67 (3.830356053), SRC @ 72 (3.815262485), ERBB4 @ 84 (3.769879596), STAT3 @ 92 (3.744179493), MUC4 @ 97 (3.732637271)	RPS27A	35	3.95947	RPS26 @ 4 (4.467848456), TP53 @ 7 (4.263878027), EGFR @ 8 (4.259252678), BRCA1 @ 14 (4.109727894), APP @ 20 (4.06357256), CTNNB1 @ 23 (4.032609254), H3C13 @ 28 (3.995298939), H3C12 @ 30 (3.990523587), H2AX @ 33 (3.978872976), UBA52 @ 41 (3.930125003), JUN @ 42 (3.928420791), MDM2 @ 47 (3.863162591), CDH1 @ 48 (3.861344958), H4C6 @ 52 (3.853376106), ERBB2 @ 53 (3.843354357), RELA @ 55 (3.832644555…
HSP90AB1	47	3.89559	ERBB3 @ 1 (5), CDK2 @ 3 (4.692024128), RPS26 @ 4 (4.685311238), EGFR @ 18 (4.255273461), KPNA2 @ 20 (4.185288434), GRB2 @ 21 (4.184991908), IGF1R @ 23 (4.061111546), TP53 @ 29 (4.011818792), YWHAE @ 31 (4.000171791), CDK1 @ 36 (3.960479767), CTNNB1 @ 42 (3.926547961), EP300 @ 44 (3.908165976), GRK2 @ 45 (3.906377942), RPS27A @ 64 (3.841632945), TERF1 @ 65 (3.835912394), ERBB2 @ 67 (3.830356053), …	UBA52	41	3.93013	RPS26 @ 4 (4.467848456), NRF1 @ 22 (4.046253517), NFKB1 @ 24 (4.021122149), H3C13 @ 28 (3.995298939), H3C12 @ 30 (3.990523587), H2AX @ 33 (3.978872976), RPS27A @ 35 (3.95946954), JUN @ 42 (3.928420791), MDM2 @ 47 (3.863162591), CDH1 @ 48 (3.861344958), H4C6 @ 52 (3.853376106), FSHR @ 58 (3.813411806), TRAF6 @ 60 (3.802540496), ERCC6 @ 63 (3.791796078), GRB2 @ 65 (3.770730971), BMPR1B @ 76 (3.7253…
PIK3CA	49	3.87791	ERBB3 @ 1 (5), INSR @ 10 (4.567054143), EGFR @ 18 (4.255273461), GRB2 @ 21 (4.184991908), IGF1R @ 23 (4.061111546), TP53 @ 29 (4.011818792), EML4 @ 38 (3.949610242), NRAS @ 41 (3.934319021), CTNNB1 @ 42 (3.926547961), KRAS @ 43 (3.922588159), HRAS @ 55 (3.85675947), PIK3R2 @ 57 (3.849769814), ERBB2 @ 67 (3.830356053), NPM1 @ 70 (3.818434018), SRC @ 72 (3.815262485), PLCG1 @ 73 (3.813392608), PIK3…	JUN	42	3.92842	EP300 @ 3 (4.566455535), RPS26 @ 4 (4.467848456), TP53 @ 7 (4.263878027), EGFR @ 8 (4.259252678), ELAVL1 @ 12 (4.178507033), LIG3 @ 13 (4.116238444), BRCA1 @ 14 (4.109727894), YAP1 @ 15 (4.103703234), KPNA2 @ 16 (4.098579501), CDK1 @ 18 (4.078436677), RAD50 @ 19 (4.067545896), APP @ 20 (4.06357256), CTNNB1 @ 23 (4.032609254), NFKB1 @ 24 (4.021122149), SMARCA4 @ 27 (4.004652833), H3C13 @ 28 (3.995…
HRAS	55	3.85676	ERBB3 @ 1 (5), INSR @ 10 (4.567054143), IKZF3 @ 16 (4.29678545), EGFR @ 18 (4.255273461), GRB2 @ 21 (4.184991908), IGF1R @ 23 (4.061111546), CDH1 @ 26 (4.048973937), GNAS @ 27 (4.026244404), TP53 @ 29 (4.011818792), EML4 @ 38 (3.949610242), NRAS @ 41 (3.934319021), CTNNB1 @ 42 (3.926547961), KRAS @ 43 (3.922588159), PIK3CA @ 49 (3.87790566), PIK3R2 @ 57 (3.849769814), ERBB2 @ 67 (3.830356053), SR…	RELA	55	3.83264	EP300 @ 3 (4.566455535), TP53 @ 7 (4.263878027), EGFR @ 8 (4.259252678), BRCA1 @ 14 (4.109727894), YAP1 @ 15 (4.103703234), KPNA2 @ 16 (4.098579501), NRF1 @ 22 (4.046253517), CTNNB1 @ 23 (4.032609254), NFKB1 @ 24 (4.021122149), H3C13 @ 28 (3.995298939), H3C12 @ 30 (3.990523587), HDAC2 @ 31 (3.989763953), FOXP3 @ 34 (3.966832631), RPS27A @ 35 (3.95946954), IRF1 @ 39 (3.937384347), CDK9 @ 40 (3.936…
PIK3R2	57	3.84977	ERBB3 @ 1 (5), INSR @ 10 (4.567054143), IKZF3 @ 16 (4.29678545), EGFR @ 18 (4.255273461), GRB2 @ 21 (4.184991908), IGF1R @ 23 (4.061111546), EML4 @ 38 (3.949610242), NRAS @ 41 (3.934319021), KRAS @ 43 (3.922588159), PIK3CA @ 49 (3.87790566), HRAS @ 55 (3.85675947), ERBB2 @ 67 (3.830356053), SRC @ 72 (3.815262485), PLCG1 @ 73 (3.813392608), YWHAB @ 75 (3.807771122), PIK3CD @ 76 (3.806903236), PIK3…	TRAF6	60	3.80254	RPS26 @ 4 (4.467848456), MAPRE1 @ 6 (4.289142824), TP53 @ 7 (4.263878027), EGFR @ 8 (4.259252678), APP @ 20 (4.06357256), NFKB1 @ 24 (4.021122149), SRC @ 32 (3.98269232), RPS27A @ 35 (3.95946954), UBA52 @ 41 (3.930125003), RELA @ 55 (3.832644555), ATM @ 59 (3.803938404), RUNX1 @ 71 (3.759465655), STAT3 @ 75 (3.739433125), BMPR1B @ 76 (3.725317326), NPM1 @ 79 (3.723229211), AKT1 @ 82 (3.716718023)…
UBA52	58	3.84914	CDK2 @ 3 (4.692024128), RPS26 @ 4 (4.685311238), FSHR @ 6 (4.659420845), TBP @ 13 (4.487899762), GRB2 @ 21 (4.184991908), CDH1 @ 26 (4.048973937), GRK2 @ 45 (3.906377942), RPS27A @ 64 (3.841632945)	GRB2	65	3.77073	ERBB3 @ 2 (4.731127927), EP300 @ 3 (4.566455535), RPS26 @ 4 (4.467848456), TP53 @ 7 (4.263878027), EGFR @ 8 (4.259252678), ELAVL1 @ 12 (4.178507033), KPNA2 @ 16 (4.098579501), APP @ 20 (4.06357256), ERBB4 @ 29 (3.99164713), SRC @ 32 (3.98269232), YWHAE @ 37 (3.946570154), UBA52 @ 41 (3.930125003), ERBB2 @ 53 (3.843354357), MYC @ 56 (3.825986802), AR @ 64 (3.786837043), FGF9 @ 67 (3.766703653), ST…
RPS27A	64	3.84163	CDK2 @ 3 (4.692024128), RPS26 @ 4 (4.685311238), FSHR @ 6 (4.659420845), EGFR @ 18 (4.255273461), CDH1 @ 26 (4.048973937), TP53 @ 29 (4.011818792), CTNNB1 @ 42 (3.926547961), HSP90AB1 @ 47 (3.89559168), UBA52 @ 58 (3.849143067), ERBB2 @ 67 (3.830356053), APP @ 91 (3.745785722)	PRKACA	69	3.76236	GATA4 @ 1 (5), EP300 @ 3 (4.566455535), RPS26 @ 4 (4.467848456), MAPRE1 @ 6 (4.289142824), TP53 @ 7 (4.263878027), EGFR @ 8 (4.259252678), CTNNB1 @ 23 (4.032609254), NFKB1 @ 24 (4.021122149), SRC @ 32 (3.98269232), YWHAE @ 37 (3.946570154), CDK9 @ 40 (3.936164117), JUN @ 42 (3.928420791), HDAC1 @ 45 (3.875037284), SOX9 @ 50 (3.856009024), ERBB2 @ 53 (3.843354357), RELA @ 55 (3.832644555), AR @ 64…
SRC	72	3.81526	ERBB3 @ 1 (5), YAP1 @ 8 (4.590383402), INSR @ 10 (4.567054143), EGFR @ 18 (4.255273461), RUNX1 @ 19 (4.230547681), GRB2 @ 21 (4.184991908), IGF1R @ 23 (4.061111546), CDH1 @ 26 (4.048973937), GNAS @ 27 (4.026244404), TP53 @ 29 (4.011818792), YWHAE @ 31 (4.000171791), CDK1 @ 36 (3.960479767), NRAS @ 41 (3.934319021), CTNNB1 @ 42 (3.926547961), KRAS @ 43 (3.922588159), EP300 @ 44 (3.908165976), GRK2…	HSP90AB1	77	3.72518	ERBB3 @ 2 (4.731127927), EP300 @ 3 (4.566455535), RPS26 @ 4 (4.467848456), MAPRE1 @ 6 (4.289142824), TP53 @ 7 (4.263878027), EGFR @ 8 (4.259252678), KPNA2 @ 16 (4.098579501), CDK1 @ 18 (4.078436677), CTNNB1 @ 23 (4.032609254), NFKB1 @ 24 (4.021122149), H3C13 @ 28 (3.995298939), ERBB4 @ 29 (3.99164713), H3C12 @ 30 (3.990523587), SRC @ 32 (3.98269232), RPS27A @ 35 (3.95946954), YWHAE @ 37 (3.946570…
PLCG1	73	3.81339	ERBB3 @ 1 (5), INSR @ 10 (4.567054143), EGFR @ 18 (4.255273461), GRB2 @ 21 (4.184991908), IGF1R @ 23 (4.061111546), EML4 @ 38 (3.949610242), PIK3CA @ 49 (3.87790566), PIK3R2 @ 57 (3.849769814), ERBB2 @ 67 (3.830356053), NPM1 @ 70 (3.818434018), SRC @ 72 (3.815262485), PIK3CD @ 76 (3.806903236), PIK3CB @ 79 (3.788819698), ERBB4 @ 84 (3.769879596), PIK3R3 @ 88 (3.750814494), SHC1 @ 89 (3.749321692)…	XRCC6	80	3.71853	EP300 @ 3 (4.566455535), TP53 @ 7 (4.263878027), EGFR @ 8 (4.259252678), XRCC1 @ 9 (4.232647006), CHEK2 @ 10 (4.196264648), LIG3 @ 13 (4.116238444), BRCA1 @ 14 (4.109727894), CDK1 @ 18 (4.078436677), RAD50 @ 19 (4.067545896), NRF1 @ 22 (4.046253517), PNKP @ 26 (4.016412119), H3C12 @ 30 (3.990523587), H2AX @ 33 (3.978872976), CDK9 @ 40 (3.936164117), JUN @ 42 (3.928420791), MDM2 @ 47 (3.863162591)…
RAB5B	78	3.79689	CDK1 @ 36 (3.960479767)	HSP90AA1	87	3.70648	ERBB3 @ 2 (4.731127927), EP300 @ 3 (4.566455535), TP53 @ 7 (4.263878027), EGFR @ 8 (4.259252678), BRCA1 @ 14 (4.109727894), CDK1 @ 18 (4.078436677), APP @ 20 (4.06357256), NRF1 @ 22 (4.046253517), NFKB1 @ 24 (4.021122149), H3C13 @ 28 (3.995298939), ERBB4 @ 29 (3.99164713), H3C12 @ 30 (3.990523587), SRC @ 32 (3.98269232), H2AX @ 33 (3.978872976), RPS27A @ 35 (3.95946954), YWHAE @ 37 (3.946570154),…
PIK3CB	79	3.78882	ERBB3 @ 1 (5), INSR @ 10 (4.567054143), EGFR @ 18 (4.255273461), GRB2 @ 21 (4.184991908), IGF1R @ 23 (4.061111546), EML4 @ 38 (3.949610242), NRAS @ 41 (3.934319021), KRAS @ 43 (3.922588159), PIK3CA @ 49 (3.87790566), HRAS @ 55 (3.85675947), PIK3R2 @ 57 (3.849769814), ERBB2 @ 67 (3.830356053), SRC @ 72 (3.815262485), PLCG1 @ 73 (3.813392608), PIK3CD @ 76 (3.806903236), GNB1 @ 80 (3.788808915), ERB…	RAB7A	91	3.69406	ELAVL1 @ 12 (4.178507033), RAB5B @ 21 (4.053134222), TRAF6 @ 60 (3.802540496)
SHC1	89	3.74932	ERBB3 @ 1 (5), INSR @ 10 (4.567054143), EGFR @ 18 (4.255273461), GRB2 @ 21 (4.184991908), IGF1R @ 23 (4.061111546), EML4 @ 38 (3.949610242), KRAS @ 43 (3.922588159), HSP90AB1 @ 47 (3.89559168), HRAS @ 55 (3.85675947), PIK3R2 @ 57 (3.849769814), NRG1 @ 59 (3.848289148), ERBB2 @ 67 (3.830356053), CLTC @ 68 (3.829350917), NPM1 @ 70 (3.818434018), SRC @ 72 (3.815262485), PLCG1 @ 73 (3.813392608), ERB…	PTPN11	103	3.65156	ERBB3 @ 2 (4.731127927), EGFR @ 8 (4.259252678), ELAVL1 @ 12 (4.178507033), CTNNB1 @ 23 (4.032609254), ERBB4 @ 29 (3.99164713), SRC @ 32 (3.98269232), ERBB2 @ 53 (3.843354357), MYC @ 56 (3.825986802), TRAF6 @ 60 (3.802540496), AR @ 64 (3.786837043), GRB2 @ 65 (3.770730971), PRKACA @ 69 (3.762362936), RUNX1 @ 71 (3.759465655), STAT1 @ 72 (3.759329862), STAT3 @ 75 (3.739433125), NPM1 @ 79 (3.723229…
APP	91	3.74579	RPS26 @ 4 (4.685311238), TBPL1 @ 9 (4.587803787), RAB35 @ 17 (4.272343404), EGFR @ 18 (4.255273461), KPNA2 @ 20 (4.185288434), GRB2 @ 21 (4.184991908), PAPSS2 @ 22 (4.109209196), IGF1R @ 23 (4.061111546), ETHE1 @ 35 (3.964977825), CDK1 @ 36 (3.960479767), CTNNB1 @ 42 (3.926547961), KRAS @ 43 (3.922588159), POMC @ 56 (3.852283734), PIK3R2 @ 57 (3.849769814), RPS27A @ 64 (3.841632945), NPM1 @ 70 (3…	RHOA	104	3.64667	GATA4 @ 1 (5), ERBB3 @ 2 (4.731127927), EGFR @ 8 (4.259252678), NRF1 @ 22 (4.046253517), CTNNB1 @ 23 (4.032609254), NFKB1 @ 24 (4.021122149), SRC @ 32 (3.98269232), RPS27A @ 35 (3.95946954), JUN @ 42 (3.928420791), MDM2 @ 47 (3.863162591), CDH1 @ 48 (3.861344958), ERBB2 @ 53 (3.843354357), MYC @ 56 (3.825986802), PRKACA @ 69 (3.762362936), AKT1 @ 82 (3.716718023), HSP90AA1 @ 87 (3.706481498)
MUC4	97	3.73264	ERBB3 @ 1 (5), EGFR @ 18 (4.255273461), MUC1 @ 46 (3.897446897), ERBB2 @ 67 (3.830356053)	ACTB	111	3.61867	EP300 @ 3 (4.566455535), TP53 @ 7 (4.263878027), EGFR @ 8 (4.259252678), ELAVL1 @ 12 (4.178507033), APP @ 20 (4.06357256), NRF1 @ 22 (4.046253517), CTNNB1 @ 23 (4.032609254), NFKB1 @ 24 (4.021122149), SMARCA4 @ 27 (4.004652833), H3C13 @ 28 (3.995298939), H3C12 @ 30 (3.990523587), SRC @ 32 (3.98269232), H2AX @ 33 (3.978872976), JUN @ 42 (3.928420791), RAB35 @ 44 (3.880783612), HDAC1 @ 45 (3.875037…
PLCG2	98	3.73145	ERBB3 @ 1 (5), EGFR @ 18 (4.255273461), GRB2 @ 21 (4.184991908), IGF1R @ 23 (4.061111546), TP53 @ 29 (4.011818792), EML4 @ 38 (3.949610242), PIK3CA @ 49 (3.87790566), PIK3R2 @ 57 (3.849769814), ERBB2 @ 67 (3.830356053), NPM1 @ 70 (3.818434018), SRC @ 72 (3.815262485), PLCG1 @ 73 (3.813392608), PIK3CD @ 76 (3.806903236), PIK3CB @ 79 (3.788819698), ERBB4 @ 84 (3.769879596), PIK3R3 @ 88 (3.750814494…	CREBBP	112	3.61793	EP300 @ 3 (4.566455535), TP53 @ 7 (4.263878027), ELAVL1 @ 12 (4.178507033), BRCA1 @ 14 (4.109727894), KPNA2 @ 16 (4.098579501), APP @ 20 (4.06357256), CTNNB1 @ 23 (4.032609254), NFKB1 @ 24 (4.021122149), SMARCA4 @ 27 (4.004652833), H3C13 @ 28 (3.995298939), H3C12 @ 30 (3.990523587), HDAC2 @ 31 (3.989763953), SRC @ 32 (3.98269232), IRF1 @ 39 (3.937384347), JUN @ 42 (3.928420791), HDAC1 @ 45 (3.875…
ABL1	101	3.71897	ERBB3 @ 1 (5), YAP1 @ 8 (4.590383402), EGFR @ 18 (4.255273461), RUNX1 @ 19 (4.230547681), GRB2 @ 21 (4.184991908), IKZF1 @ 28 (4.018602888), TP53 @ 29 (4.011818792), YWHAE @ 31 (4.000171791), CDK1 @ 36 (3.960479767), NRAS @ 41 (3.934319021), CTNNB1 @ 42 (3.926547961), KRAS @ 43 (3.922588159), EP300 @ 44 (3.908165976), MUC1 @ 46 (3.897446897), HSP90AB1 @ 47 (3.89559168), PIK3CA @ 49 (3.87790566), …	ABL1	116	3.60599	ERBB3 @ 2 (4.731127927), EP300 @ 3 (4.566455535), TP53 @ 7 (4.263878027), EGFR @ 8 (4.259252678), LIG3 @ 13 (4.116238444), BRCA1 @ 14 (4.109727894), YAP1 @ 15 (4.103703234), CDK1 @ 18 (4.078436677), APP @ 20 (4.06357256), CTNNB1 @ 23 (4.032609254), ERBB4 @ 29 (3.99164713), HDAC2 @ 31 (3.989763953), SRC @ 32 (3.98269232), YWHAE @ 37 (3.946570154), JUN @ 42 (3.928420791), MDM2 @ 47 (3.863162591), E…
PIK3R1	102	3.70388	ERBB3 @ 1 (5), INSR @ 10 (4.567054143), EGFR @ 18 (4.255273461), GRB2 @ 21 (4.184991908), IGF1R @ 23 (4.061111546), EML4 @ 38 (3.949610242), NRAS @ 41 (3.934319021), CTNNB1 @ 42 (3.926547961), KRAS @ 43 (3.922588159), EP300 @ 44 (3.908165976), PIK3CA @ 49 (3.87790566), HRAS @ 55 (3.85675947), PIK3R2 @ 57 (3.849769814), ERBB2 @ 67 (3.830356053), NPM1 @ 70 (3.818434018), SRC @ 72 (3.815262485), PLC…	PTK2	124	3.59449	ERBB3 @ 2 (4.731127927), TP53 @ 7 (4.263878027), EGFR @ 8 (4.259252678), ELAVL1 @ 12 (4.178507033), APP @ 20 (4.06357256), NRF1 @ 22 (4.046253517), CTNNB1 @ 23 (4.032609254), SRC @ 32 (3.98269232), CDK9 @ 40 (3.936164117), MDM2 @ 47 (3.863162591), CDH1 @ 48 (3.861344958), ERBB2 @ 53 (3.843354357), GRB2 @ 65 (3.770730971), PRKACA @ 69 (3.762362936), STAT1 @ 72 (3.759329862), STAT3 @ 75 (3.73943312…
RELA	118	3.63481	YAP1 @ 8 (4.590383402), TBP @ 13 (4.487899762), GTF2B @ 15 (4.432465953), EGFR @ 18 (4.255273461), KPNA2 @ 20 (4.185288434), TP53 @ 29 (4.011818792), SIN3A @ 33 (3.966211795), ETHE1 @ 35 (3.964977825), FOXP3 @ 40 (3.94032475), CTNNB1 @ 42 (3.926547961), EP300 @ 44 (3.908165976), MUC1 @ 46 (3.897446897), HSP90AB1 @ 47 (3.89559168), RPS27A @ 64 (3.841632945), CLTC @ 68 (3.829350917), NPM1 @ 70 (3.8…	CUL1	126	3.59208	TP53 @ 7 (4.263878027), CHEK2 @ 10 (4.196264648), ELAVL1 @ 12 (4.178507033), KPNA2 @ 16 (4.098579501), CTNNB1 @ 23 (4.032609254), NFKB1 @ 24 (4.021122149), HDAC2 @ 31 (3.989763953), RPS27A @ 35 (3.95946954), YWHAE @ 37 (3.946570154), CDK9 @ 40 (3.936164117), UBA52 @ 41 (3.930125003), MDM2 @ 47 (3.863162591), EZH2 @ 49 (3.859099803), MYC @ 56 (3.825986802), TRAF6 @ 60 (3.802540496), DNMT3B @ 66 (3…
CALM1	120	3.59382	INSR @ 10 (4.567054143), EGFR @ 18 (4.255273461), GRB2 @ 21 (4.184991908), GNAS @ 27 (4.026244404), CAMKMT @ 30 (4.00307881), YWHAE @ 31 (4.000171791), KRAS @ 43 (3.922588159), GRK2 @ 45 (3.906377942), YWHAB @ 75 (3.807771122)	KRAS	128	3.58216	ERBB3 @ 2 (4.731127927), EP300 @ 3 (4.566455535), EGFR @ 8 (4.259252678), ELAVL1 @ 12 (4.178507033), CDK1 @ 18 (4.078436677), APP @ 20 (4.06357256), CTNNB1 @ 23 (4.032609254), NFKB1 @ 24 (4.021122149), ERBB4 @ 29 (3.99164713), SRC @ 32 (3.98269232), HDAC1 @ 45 (3.875037284), CDH1 @ 48 (3.861344958), ERBB2 @ 53 (3.843354357), MYC @ 56 (3.825986802), ATM @ 59 (3.803938404), SIRT1 @ 61 (3.802094612)…
CREBBP	121	3.59377	CDK2 @ 3 (4.692024128), TBP @ 13 (4.487899762), GTF2B @ 15 (4.432465953), RUNX1 @ 19 (4.230547681), KPNA2 @ 20 (4.185288434), CDH1 @ 26 (4.048973937), TP53 @ 29 (4.011818792), SIN3A @ 33 (3.966211795), CTBP1 @ 34 (3.965358784), CTNNB1 @ 42 (3.926547961), EP300 @ 44 (3.908165976), SRC @ 72 (3.815262485), FHL2 @ 82 (3.784994951), LEF1 @ 87 (3.764766052), FOXO1 @ 90 (3.74627242), APP @ 91 (3.7457857…	FOS	134	3.55783	GATA4 @ 1 (5), EP300 @ 3 (4.566455535), TP53 @ 7 (4.263878027), EGFR @ 8 (4.259252678), CHEK2 @ 10 (4.196264648), APP @ 20 (4.06357256), CTNNB1 @ 23 (4.032609254), NFKB1 @ 24 (4.021122149), H3C13 @ 28 (3.995298939), H3C12 @ 30 (3.990523587), HDAC2 @ 31 (3.989763953), SRC @ 32 (3.98269232), IRF1 @ 39 (3.937384347), JUN @ 42 (3.928420791), HDAC1 @ 45 (3.875037284), MDM2 @ 47 (3.863162591), H4C6 @ 5…
HSP90AA1	125	3.589	ERBB3 @ 1 (5), CDK2 @ 3 (4.692024128), EGFR @ 18 (4.255273461), GRB2 @ 21 (4.184991908), IGF1R @ 23 (4.061111546), CDH1 @ 26 (4.048973937), TP53 @ 29 (4.011818792), YWHAE @ 31 (4.000171791), SIN3A @ 33 (3.966211795), CDK1 @ 36 (3.960479767), NRAS @ 41 (3.934319021), KRAS @ 43 (3.922588159), EP300 @ 44 (3.908165976), GRK2 @ 45 (3.906377942), MUC1 @ 46 (3.897446897), HSP90AB1 @ 47 (3.89559168), TER…	XRCC5	135	3.55702	EP300 @ 3 (4.566455535), XRCC1 @ 9 (4.232647006), CHEK2 @ 10 (4.196264648), LIG3 @ 13 (4.116238444), BRCA1 @ 14 (4.109727894), RAD50 @ 19 (4.067545896), NRF1 @ 22 (4.046253517), PNKP @ 26 (4.016412119), H2AX @ 33 (3.978872976), JUN @ 42 (3.928420791), CDH1 @ 48 (3.861344958), H4C6 @ 52 (3.853376106), MYC @ 56 (3.825986802), FEN1 @ 57 (3.81699797), ATM @ 59 (3.803938404), AR @ 64 (3.786837043), NB…
JUN	131	3.57286	CDK2 @ 3 (4.692024128), RPS26 @ 4 (4.685311238), YAP1 @ 8 (4.590383402), TBP @ 13 (4.487899762), GTF2B @ 15 (4.432465953), EGFR @ 18 (4.255273461), RUNX1 @ 19 (4.230547681), KPNA2 @ 20 (4.185288434), TP53 @ 29 (4.011818792), YWHAE @ 31 (4.000171791), CDK1 @ 36 (3.960479767), CTNNB1 @ 42 (3.926547961), EP300 @ 44 (3.908165976), MUC1 @ 46 (3.897446897), HSP90AB1 @ 47 (3.89559168), TERF2 @ 48 (3.885…	PIK3C3	152	3.53018	CDK1 @ 18 (4.078436677), RAB5B @ 21 (4.053134222), HDAC1 @ 45 (3.875037284), AKT1 @ 82 (3.716718023), KEAP1 @ 83 (3.711971154), HSP90AA1 @ 87 (3.706481498)
UBB	159	3.52083	CDK2 @ 3 (4.692024128), FSHR @ 6 (4.659420845), EGFR @ 18 (4.255273461), GRB2 @ 21 (4.184991908), TP53 @ 29 (4.011818792), CTNNB1 @ 42 (3.926547961), HRAS @ 55 (3.85675947), UBA52 @ 58 (3.849143067), RPS27A @ 64 (3.841632945), ERBB2 @ 67 (3.830356053), SRC @ 72 (3.815262485), APP @ 91 (3.745785722)	MAPK3	153	3.52728	GATA4 @ 1 (5), TP53 @ 7 (4.263878027), EGFR @ 8 (4.259252678), BRCA1 @ 14 (4.109727894), CDK1 @ 18 (4.078436677), APP @ 20 (4.06357256), NFKB1 @ 24 (4.021122149), SRC @ 32 (3.98269232), CDK9 @ 40 (3.936164117), JUN @ 42 (3.928420791), CDH1 @ 48 (3.861344958), MYC @ 56 (3.825986802), AR @ 64 (3.786837043), GRB2 @ 65 (3.770730971), FGF9 @ 67 (3.766703653), PRKACA @ 69 (3.762362936), RUNX1 @ 71 (3.7…
PTPN11	164	3.51056	ERBB3 @ 1 (5), INSR @ 10 (4.567054143), EGFR @ 18 (4.255273461), RUNX1 @ 19 (4.230547681), GRB2 @ 21 (4.184991908), IGF1R @ 23 (4.061111546), NRAS @ 41 (3.934319021), CTNNB1 @ 42 (3.926547961), KRAS @ 43 (3.922588159), PIK3CA @ 49 (3.87790566), HRAS @ 55 (3.85675947), PIK3R2 @ 57 (3.849769814), ERBB2 @ 67 (3.830356053), NPM1 @ 70 (3.818434018), SRC @ 72 (3.815262485), PLCG1 @ 73 (3.813392608), PI…	UBB	156	3.51912	TP53 @ 7 (4.263878027), EGFR @ 8 (4.259252678), BRCA1 @ 14 (4.109727894), APP @ 20 (4.06357256), CTNNB1 @ 23 (4.032609254), H3C13 @ 28 (3.995298939), H3C12 @ 30 (3.990523587), SRC @ 32 (3.98269232), H2AX @ 33 (3.978872976), RPS27A @ 35 (3.95946954), UBA52 @ 41 (3.930125003), JUN @ 42 (3.928420791), MDM2 @ 47 (3.863162591), EZH2 @ 49 (3.859099803), H4C6 @ 52 (3.853376106), ERBB2 @ 53 (3.843354357)…
PA2G4	182	3.48519	ERBB3 @ 1 (5), CDK2 @ 3 (4.692024128), RPS26 @ 4 (4.685311238), SIN3A @ 33 (3.966211795), UBA52 @ 58 (3.849143067), RPS27A @ 64 (3.841632945), TERF1 @ 65 (3.835912394), NPM1 @ 70 (3.818434018)	EEA1	161	3.51558	EGFR @ 8 (4.259252678), RAB5B @ 21 (4.053134222), ERBB2 @ 53 (3.843354357)
IGKV1D-33	194	3.46459	ERBB3 @ 1 (5), EGFR @ 18 (4.255273461), HRAS @ 55 (3.85675947), ERBB2 @ 67 (3.830356053)	PIK3CA	169	3.49722	ERBB3 @ 2 (4.731127927), TP53 @ 7 (4.263878027), EGFR @ 8 (4.259252678), CTNNB1 @ 23 (4.032609254), ERBB4 @ 29 (3.99164713), SRC @ 32 (3.98269232), HDAC1 @ 45 (3.875037284), ERBB2 @ 53 (3.843354357), MYC @ 56 (3.825986802), TRAF6 @ 60 (3.802540496), GRB2 @ 65 (3.770730971), STAT1 @ 72 (3.759329862), STAT3 @ 75 (3.739433125), NPM1 @ 79 (3.723229211), AKT1 @ 82 (3.716718023), HSP90AA1 @ 87 (3.70648…
ACTB	195	3.46439	CDK2 @ 3 (4.692024128), INSR @ 10 (4.567054143), TBP @ 13 (4.487899762), RAB35 @ 17 (4.272343404), EGFR @ 18 (4.255273461), GRB2 @ 21 (4.184991908), CDH1 @ 26 (4.048973937), TP53 @ 29 (4.011818792), CTNNB1 @ 42 (3.926547961), EP300 @ 44 (3.908165976), HSP90AB1 @ 47 (3.89559168), PIK3R2 @ 57 (3.849769814), CBX5 @ 60 (3.848006823), ERBB2 @ 67 (3.830356053), NPM1 @ 70 (3.818434018), SRC @ 72 (3.8152…	GDI2	170	3.49367	ELAVL1 @ 12 (4.178507033), RAB5B @ 21 (4.053134222), YWHAE @ 37 (3.946570154), JUN @ 42 (3.928420791), RAB35 @ 44 (3.880783612), TRAF6 @ 60 (3.802540496), RAB7A @ 91 (3.694059873)
PRKACA	197	3.45831	RPS26 @ 4 (4.685311238), EGFR @ 18 (4.255273461), IGF1R @ 23 (4.061111546), GNAS @ 27 (4.026244404), TP53 @ 29 (4.011818792), YWHAE @ 31 (4.000171791), CTNNB1 @ 42 (3.926547961), EP300 @ 44 (3.908165976), GRK2 @ 45 (3.906377942), HSP90AB1 @ 47 (3.89559168), ERBB2 @ 67 (3.830356053), CLTC @ 68 (3.829350917), NPM1 @ 70 (3.818434018), SRC @ 72 (3.815262485), PLCG1 @ 73 (3.813392608), GNB1 @ 80 (3.78…	MPO	176	3.48175	RUNX1 @ 71 (3.759465655)
PRKACB	209	3.4327	RPS26 @ 4 (4.685311238), IGF1R @ 23 (4.061111546), GNAS @ 27 (4.026244404), CTNNB1 @ 42 (3.926547961), EP300 @ 44 (3.908165976), HSP90AB1 @ 47 (3.89559168), GNB1 @ 80 (3.788808915), GNG2 @ 86 (3.766846214), FOXO1 @ 90 (3.74627242)	NFATC2	178	3.48055	GATA4 @ 1 (5), EP300 @ 3 (4.566455535), FOXP3 @ 34 (3.966832631), JUN @ 42 (3.928420791), HDAC1 @ 45 (3.875037284), RELA @ 55 (3.832644555), RUNX1 @ 71 (3.759465655)
IGKV1-33	210	3.42657	ERBB3 @ 1 (5), EGFR @ 18 (4.255273461), HRAS @ 55 (3.85675947), ERBB2 @ 67 (3.830356053)	MAPK1	183	3.46544	GATA4 @ 1 (5), EP300 @ 3 (4.566455535), TP53 @ 7 (4.263878027), EGFR @ 8 (4.259252678), BRCA1 @ 14 (4.109727894), APP @ 20 (4.06357256), NFKB1 @ 24 (4.021122149), SRC @ 32 (3.98269232), JUN @ 42 (3.928420791), MDM2 @ 47 (3.863162591), RELA @ 55 (3.832644555), MYC @ 56 (3.825986802), AR @ 64 (3.786837043), GRB2 @ 65 (3.770730971), PRKACA @ 69 (3.762362936), RUNX1 @ 71 (3.759465655), STAT1 @ 72 (3.…
ITK	211	3.42591	ERBB3 @ 1 (5), EGFR @ 18 (4.255273461), KPNA2 @ 20 (4.185288434), GRB2 @ 21 (4.184991908), HSP90AB1 @ 47 (3.89559168), PIK3CA @ 49 (3.87790566), PIK3R2 @ 57 (3.849769814), ERBB2 @ 67 (3.830356053), SRC @ 72 (3.815262485), PLCG1 @ 73 (3.813392608), PIK3CD @ 76 (3.806903236), PIK3CB @ 79 (3.788819698), PIK3R3 @ 88 (3.750814494), PLCG2 @ 98 (3.731445794)	DHX9	186	3.46083	RPS26 @ 4 (4.467848456), EGFR @ 8 (4.259252678), ELAVL1 @ 12 (4.178507033), BRCA1 @ 14 (4.109727894), RAB5B @ 21 (4.053134222), NRF1 @ 22 (4.046253517), CTNNB1 @ 23 (4.032609254), H2AX @ 33 (3.978872976), JUN @ 42 (3.928420791), NR0B1 @ 46 (3.864347127), MDM2 @ 47 (3.863162591), EZH2 @ 49 (3.859099803), RELA @ 55 (3.832644555), TRAF6 @ 60 (3.802540496), GRB2 @ 65 (3.770730971), XRCC6 @ 80 (3.7185…
NFKBIA	213	3.42399	IKZF4 @ 2 (4.998117848), INSR @ 10 (4.567054143), TP53 @ 29 (4.011818792), EP300 @ 44 (3.908165976), UBA52 @ 58 (3.849143067), RPS27A @ 64 (3.841632945), CLTC @ 68 (3.829350917), SRC @ 72 (3.815262485), STAT3 @ 92 (3.744179493)	PPP2CA	190	3.4536	TP53 @ 7 (4.263878027), EGFR @ 8 (4.259252678), CHEK2 @ 10 (4.196264648), BRCA1 @ 14 (4.109727894), YAP1 @ 15 (4.103703234), CDK1 @ 18 (4.078436677), NRF1 @ 22 (4.046253517), CTNNB1 @ 23 (4.032609254), NFKB1 @ 24 (4.021122149), SRC @ 32 (3.98269232), H2AX @ 33 (3.978872976), ERBB2 @ 53 (3.843354357), RELA @ 55 (3.832644555), MYC @ 56 (3.825986802), BMPR1B @ 76 (3.725317326), NPM1 @ 79 (3.72322921…
CFP	219	3.41076	MPO @ 25 (4.049897784)	NRAS	193	3.44843	ERBB3 @ 2 (4.731127927), EGFR @ 8 (4.259252678), ELAVL1 @ 12 (4.178507033), CTNNB1 @ 23 (4.032609254), NFKB1 @ 24 (4.021122149), ERBB4 @ 29 (3.99164713), HDAC2 @ 31 (3.989763953), SRC @ 32 (3.98269232), EZH2 @ 49 (3.859099803), ERBB2 @ 53 (3.843354357), GRB2 @ 65 (3.770730971), RUNX1 @ 71 (3.759465655), NPM1 @ 79 (3.723229211), AKT1 @ 82 (3.716718023), HSP90AA1 @ 87 (3.706481498), YWHAB @ 93 (3.6…
GDI2	239	3.37147	RAB35 @ 17 (4.272343404), YWHAE @ 31 (4.000171791), RAB5B @ 78 (3.79689129)	RAB5C	197	3.4382	APP @ 20 (4.06357256), RAB5B @ 21 (4.053134222), SMARCA4 @ 27 (4.004652833), TRAF6 @ 60 (3.802540496), RAD51 @ 85 (3.708628165), CDK2 @ 89 (3.699623682), CLTC @ 98 (3.665966184), RIN1 @ 100 (3.661582788)
SFTPD	242	3.36544	MPO @ 25 (4.049897784), MUC1 @ 46 (3.897446897), DCN @ 53 (3.863807295)	PRKACB	202	3.43157	EP300 @ 3 (4.566455535), RPS26 @ 4 (4.467848456), MAPRE1 @ 6 (4.289142824), CTNNB1 @ 23 (4.032609254), NFKB1 @ 24 (4.021122149), JUN @ 42 (3.928420791), SOX9 @ 50 (3.856009024), RELA @ 55 (3.832644555), TRAF6 @ 60 (3.802540496), AR @ 64 (3.786837043), PRKACA @ 69 (3.762362936), HSP90AB1 @ 77 (3.725182879), MED1 @ 84 (3.711224374), HSP90AA1 @ 87 (3.706481498), ESR1 @ 95 (3.677494751)
LTF	244	3.3605	MPO @ 25 (4.049897784), INS @ 94 (3.741981928)	UBC	207	3.42372	EP300 @ 3 (4.566455535), TP53 @ 7 (4.263878027), EGFR @ 8 (4.259252678), BRCA1 @ 14 (4.109727894), H3C13 @ 28 (3.995298939), H3C12 @ 30 (3.990523587), H2AX @ 33 (3.978872976), RPS27A @ 35 (3.95946954), UBA52 @ 41 (3.930125003), MDM2 @ 47 (3.863162591), H4C6 @ 52 (3.853376106), RELA @ 55 (3.832644555), ATM @ 59 (3.803938404), TRAF6 @ 60 (3.802540496), ERCC6 @ 63 (3.791796078), HSP90AB1 @ 77 (3.725…
NFKB1	246	3.35423	EGFR @ 18 (4.255273461), KPNA2 @ 20 (4.185288434), GNAS @ 27 (4.026244404), TP53 @ 29 (4.011818792), SIN3A @ 33 (3.966211795), CDK1 @ 36 (3.960479767), FOXP3 @ 40 (3.94032475), NRAS @ 41 (3.934319021), CTNNB1 @ 42 (3.926547961), KRAS @ 43 (3.922588159), EP300 @ 44 (3.908165976), HSP90AB1 @ 47 (3.89559168), HRAS @ 55 (3.85675947), UBA52 @ 58 (3.849143067), ERBB2 @ 67 (3.830356053), CLTC @ 68 (3.82…	PIK3R1	212	3.41946	ERBB3 @ 2 (4.731127927), EP300 @ 3 (4.566455535), EGFR @ 8 (4.259252678), LIG3 @ 13 (4.116238444), BRCA1 @ 14 (4.109727894), CTNNB1 @ 23 (4.032609254), ERBB4 @ 29 (3.99164713), SRC @ 32 (3.98269232), HDAC1 @ 45 (3.875037284), ERBB2 @ 53 (3.843354357), SIRT1 @ 61 (3.802094612), AR @ 64 (3.786837043), GRB2 @ 65 (3.770730971), PRKACA @ 69 (3.762362936), STAT1 @ 72 (3.759329862), STAT3 @ 75 (3.739433…
RAB5C	247	3.35266	CDK2 @ 3 (4.692024128), CLTC @ 68 (3.829350917), RAB5B @ 78 (3.79689129), APP @ 91 (3.745785722)	MRE11	218	3.41127	EP300 @ 3 (4.566455535), TP53 @ 7 (4.263878027), XRCC1 @ 9 (4.232647006), CHEK2 @ 10 (4.196264648), LIG3 @ 13 (4.116238444), BRCA1 @ 14 (4.109727894), RAD50 @ 19 (4.067545896), H2AX @ 33 (3.978872976), JUN @ 42 (3.928420791), MDM2 @ 47 (3.863162591), H4C6 @ 52 (3.853376106), FEN1 @ 57 (3.81699797), ATM @ 59 (3.803938404), SIRT1 @ 61 (3.802094612), NBN @ 68 (3.766088409), TP53BP1 @ 78 (3.725074195…
RHOA	254	3.33723	ERBB3 @ 1 (5), IKZF3 @ 16 (4.29678545), EGFR @ 18 (4.255273461), CDH1 @ 26 (4.048973937), CTNNB1 @ 42 (3.926547961), PIK3CA @ 49 (3.87790566), RPS27A @ 64 (3.841632945), ERBB2 @ 67 (3.830356053), SRC @ 72 (3.815262485), PLCG1 @ 73 (3.813392608), GNB1 @ 80 (3.788808915), GNG2 @ 86 (3.766846214)	FYN	227	3.38114	MAPRE1 @ 6 (4.289142824), EGFR @ 8 (4.259252678), XRCC1 @ 9 (4.232647006), CDK1 @ 18 (4.078436677), APP @ 20 (4.06357256), CTNNB1 @ 23 (4.032609254), SRC @ 32 (3.98269232), CDH1 @ 48 (3.861344958), ERBB2 @ 53 (3.843354357), TRAF6 @ 60 (3.802540496), GRB2 @ 65 (3.770730971), PRKACA @ 69 (3.762362936), STAT1 @ 72 (3.759329862), STAT3 @ 75 (3.739433125), HSP90AB1 @ 77 (3.725182879), AKT1 @ 82 (3.716…
MAPK3	257	3.3318	CDK2 @ 3 (4.692024128), INSR @ 10 (4.567054143), EGFR @ 18 (4.255273461), RUNX1 @ 19 (4.230547681), GRB2 @ 21 (4.184991908), CDH1 @ 26 (4.048973937), TP53 @ 29 (4.011818792), CDK1 @ 36 (3.960479767), NRAS @ 41 (3.934319021), KRAS @ 43 (3.922588159), GRK2 @ 45 (3.906377942), HSP90AB1 @ 47 (3.89559168), HRAS @ 55 (3.85675947), SRC @ 72 (3.815262485), PLCG1 @ 73 (3.813392608), GNB1 @ 80 (3.788808915…	TRAF2	231	3.37927	EP300 @ 3 (4.566455535), EGFR @ 8 (4.259252678), AFF4 @ 17 (4.098010313), NRF1 @ 22 (4.046253517), NFKB1 @ 24 (4.021122149), RPS27A @ 35 (3.95946954), ZBTB16 @ 38 (3.943619187), CDK9 @ 40 (3.936164117), UBA52 @ 41 (3.930125003), JUN @ 42 (3.928420791), SOX9 @ 50 (3.856009024), RELA @ 55 (3.832644555), TRAF6 @ 60 (3.802540496), HSP90AB1 @ 77 (3.725182879), HSP90AA1 @ 87 (3.706481498), CLTC @ 98 (3…
DHX9	267	3.31499	CDK2 @ 3 (4.692024128), RPS26 @ 4 (4.685311238), TBP @ 13 (4.487899762), GTF2B @ 15 (4.432465953), EGFR @ 18 (4.255273461), GRB2 @ 21 (4.184991908), CTNNB1 @ 42 (3.926547961), RAB5B @ 78 (3.79689129)	HRAS	233	3.37856	ERBB3 @ 2 (4.731127927), TP53 @ 7 (4.263878027), EGFR @ 8 (4.259252678), NRF1 @ 22 (4.046253517), CTNNB1 @ 23 (4.032609254), NFKB1 @ 24 (4.021122149), ERBB4 @ 29 (3.99164713), HDAC2 @ 31 (3.989763953), SRC @ 32 (3.98269232), JUN @ 42 (3.928420791), CDH1 @ 48 (3.861344958), ERBB2 @ 53 (3.843354357), MYC @ 56 (3.825986802), SIRT1 @ 61 (3.802094612), GRB2 @ 65 (3.770730971), AKT1 @ 82 (3.716718023),…
SOS1	286	3.28749	ERBB3 @ 1 (5), INSR @ 10 (4.567054143), EGFR @ 18 (4.255273461), GRB2 @ 21 (4.184991908), IGF1R @ 23 (4.061111546), NRAS @ 41 (3.934319021), KRAS @ 43 (3.922588159), MUC1 @ 46 (3.897446897), PIK3CA @ 49 (3.87790566), HRAS @ 55 (3.85675947), PIK3R2 @ 57 (3.849769814), NRG1 @ 59 (3.848289148), ERBB2 @ 67 (3.830356053), SRC @ 72 (3.815262485), PLCG1 @ 73 (3.813392608), PIK3CB @ 79 (3.788819698), SHC…	CD4	234	3.37571	CTNNB1 @ 23 (4.032609254), NFKB1 @ 24 (4.021122149), SRC @ 32 (3.98269232), FOXP3 @ 34 (3.966832631), STAT1 @ 72 (3.759329862), STAT3 @ 75 (3.739433125), HSP90AB1 @ 77 (3.725182879), NPM1 @ 79 (3.723229211), AKT1 @ 82 (3.716718023), HSP90AA1 @ 87 (3.706481498)
PIK3C3	289	3.27987	CDK1 @ 36 (3.960479767), PIK3CA @ 49 (3.87790566), PIK3R2 @ 57 (3.849769814), RAB5B @ 78 (3.79689129), PIK3CB @ 79 (3.788819698), PIK3R3 @ 88 (3.750814494)	SKP1	254	3.34383	EP300 @ 3 (4.566455535), TP53 @ 7 (4.263878027), ELAVL1 @ 12 (4.178507033), BRCA1 @ 14 (4.109727894), CTNNB1 @ 23 (4.032609254), RPS27A @ 35 (3.95946954), CDK9 @ 40 (3.936164117), UBA52 @ 41 (3.930125003), MYC @ 56 (3.825986802), HSP90AB1 @ 77 (3.725182879), KEAP1 @ 83 (3.711971154), HSP90AA1 @ 87 (3.706481498), CDK2 @ 89 (3.699623682)
EEF1A1	292	3.27689	CDK2 @ 3 (4.692024128), RPS26 @ 4 (4.685311238), EGFR @ 18 (4.255273461), GRB2 @ 21 (4.184991908), NRAS @ 41 (3.934319021), KRAS @ 43 (3.922588159), EP300 @ 44 (3.908165976), HSP90AB1 @ 47 (3.89559168), PAPSS1 @ 54 (3.85901715), PIK3R2 @ 57 (3.849769814), UBA52 @ 58 (3.849143067), RPS27A @ 64 (3.841632945), NPM1 @ 70 (3.818434018), PLCG1 @ 73 (3.813392608)	CALM1	255	3.34353	MAPRE1 @ 6 (4.289142824), EGFR @ 8 (4.259252678), ELAVL1 @ 12 (4.178507033), NFKB1 @ 24 (4.021122149), H2AX @ 33 (3.978872976), YWHAE @ 37 (3.946570154), RELA @ 55 (3.832644555), MYC @ 56 (3.825986802), TRAF6 @ 60 (3.802540496), AR @ 64 (3.786837043), GRB2 @ 65 (3.770730971), PRKACA @ 69 (3.762362936), AKT1 @ 82 (3.716718023), HSP90AA1 @ 87 (3.706481498), YWHAB @ 93 (3.686814642), ESR1 @ 95 (3.67…
NCK1	302	3.25956	ERBB3 @ 1 (5), EGFR @ 18 (4.255273461), GRB2 @ 21 (4.184991908), PAPSS1 @ 54 (3.85901715), UBA52 @ 58 (3.849143067), NPVF @ 71 (3.816793449), SRC @ 72 (3.815262485), PLCG1 @ 73 (3.813392608), PIK3CD @ 76 (3.806903236), PIK3R3 @ 88 (3.750814494), PLCG2 @ 98 (3.731445794)	MUC1	260	3.34171	ERBB3 @ 2 (4.731127927), TP53 @ 7 (4.263878027), EGFR @ 8 (4.259252678), CTNNB1 @ 23 (4.032609254), ERBB4 @ 29 (3.99164713), SRC @ 32 (3.98269232), JUN @ 42 (3.928420791), ERBB2 @ 53 (3.843354357), RELA @ 55 (3.832644555), GRB2 @ 65 (3.770730971), STAT3 @ 75 (3.739433125), HSP90AA1 @ 87 (3.706481498), ESR1 @ 95 (3.677494751)
CUL1	307	3.25206	CDK2 @ 3 (4.692024128), KPNA2 @ 20 (4.185288434), TP53 @ 29 (4.011818792), YWHAE @ 31 (4.000171791), CTNNB1 @ 42 (3.926547961), HSP90AB1 @ 47 (3.89559168), UBA52 @ 58 (3.849143067), RPS27A @ 64 (3.841632945), CLTC @ 68 (3.829350917), NPM1 @ 70 (3.818434018)	MEF2C	267	3.33522	GATA4 @ 1 (5), EP300 @ 3 (4.566455535), CDK1 @ 18 (4.078436677), CTNNB1 @ 23 (4.032609254), JUN @ 42 (3.928420791), HDAC1 @ 45 (3.875037284), SIRT1 @ 61 (3.802094612), TBX5 @ 74 (3.754866385), AKT1 @ 82 (3.716718023)
CRK	313	3.24255	ERBB3 @ 1 (5), INSR @ 10 (4.567054143), EGFR @ 18 (4.255273461), GRB2 @ 21 (4.184991908), IGF1R @ 23 (4.061111546), TP53 @ 29 (4.011818792), YWHAE @ 31 (4.000171791), HSP90AB1 @ 47 (3.89559168), PIK3CA @ 49 (3.87790566), PIK3R2 @ 57 (3.849769814), ERBB2 @ 67 (3.830356053), SRC @ 72 (3.815262485), PIK3CD @ 76 (3.806903236), PIK3CB @ 79 (3.788819698), ERBB4 @ 84 (3.769879596), PIK3R3 @ 88 (3.750814…	B2M	274	3.32674	ERBB3 @ 2 (4.731127927), APP @ 20 (4.06357256), GRB2 @ 65 (3.770730971), STAT1 @ 72 (3.759329862)
FYN	344	3.19603	EGFR @ 18 (4.255273461), GRB2 @ 21 (4.184991908), CDH1 @ 26 (4.048973937), CDK1 @ 36 (3.960479767), CTNNB1 @ 42 (3.926547961), HSP90AB1 @ 47 (3.89559168), PIK3CA @ 49 (3.87790566), HRAS @ 55 (3.85675947), PIK3R2 @ 57 (3.849769814), NRG1 @ 59 (3.848289148), ERBB2 @ 67 (3.830356053), CLTC @ 68 (3.829350917), NPVF @ 71 (3.816793449), SRC @ 72 (3.815262485), PLCG1 @ 73 (3.813392608), PIK3CD @ 76 (3.8…	PIK3CB	291	3.29422	ERBB3 @ 2 (4.731127927), EGFR @ 8 (4.259252678), ERBB4 @ 29 (3.99164713), SRC @ 32 (3.98269232), ERBB2 @ 53 (3.843354357), GRB2 @ 65 (3.770730971), AKT1 @ 82 (3.716718023)
MAPK1	348	3.18988	CDK2 @ 3 (4.692024128), INSR @ 10 (4.567054143), EGFR @ 18 (4.255273461), RUNX1 @ 19 (4.230547681), GRB2 @ 21 (4.184991908), TP53 @ 29 (4.011818792), NRAS @ 41 (3.934319021), KRAS @ 43 (3.922588159), EP300 @ 44 (3.908165976), HSP90AB1 @ 47 (3.89559168), HRAS @ 55 (3.85675947), SRC @ 72 (3.815262485), YWHAB @ 75 (3.807771122), GNB1 @ 80 (3.788808915), CYCS @ 81 (3.787614979), FHL2 @ 82 (3.78499495…	PRKDC	299	3.28612	EP300 @ 3 (4.566455535), TP53 @ 7 (4.263878027), EGFR @ 8 (4.259252678), XRCC1 @ 9 (4.232647006), CHEK2 @ 10 (4.196264648), ELAVL1 @ 12 (4.178507033), BRCA1 @ 14 (4.109727894), NRF1 @ 22 (4.046253517), NFKB1 @ 24 (4.021122149), PNKP @ 26 (4.016412119), H2AX @ 33 (3.978872976), CDK9 @ 40 (3.936164117), JUN @ 42 (3.928420791), H4C6 @ 52 (3.853376106), RELA @ 55 (3.832644555), MYC @ 56 (3.825986802)…
VAV3	349	3.18804	ERBB3 @ 1 (5), INSR @ 10 (4.567054143), EGFR @ 18 (4.255273461), GRB2 @ 21 (4.184991908), IGF1R @ 23 (4.061111546), PIK3CA @ 49 (3.87790566), PIK3R2 @ 57 (3.849769814), ERBB2 @ 67 (3.830356053), SRC @ 72 (3.815262485), PLCG1 @ 73 (3.813392608), PIK3CD @ 76 (3.806903236), PIK3CB @ 79 (3.788819698), PIK3R3 @ 88 (3.750814494), SHC1 @ 89 (3.749321692), PLCG2 @ 98 (3.731445794)	PLCG1	302	3.28352	ERBB3 @ 2 (4.731127927), EGFR @ 8 (4.259252678), LIG3 @ 13 (4.116238444), NRF1 @ 22 (4.046253517), ERBB4 @ 29 (3.99164713), SRC @ 32 (3.98269232), ERBB2 @ 53 (3.843354357), AR @ 64 (3.786837043), GRB2 @ 65 (3.770730971), PRKACA @ 69 (3.762362936), NPM1 @ 79 (3.723229211), AKT1 @ 82 (3.716718023)
CCT2	353	3.18031	CDK2 @ 3 (4.692024128), GRB2 @ 21 (4.184991908), TP53 @ 29 (4.011818792), HSP90AB1 @ 47 (3.89559168), NPM1 @ 70 (3.818434018), SHC1 @ 89 (3.749321692)	NFATC3	310	3.28072	GATA4 @ 1 (5), JUN @ 42 (3.928420791), PRKACA @ 69 (3.762362936), AKT1 @ 82 (3.716718023)
PPP2CA	360	3.17356	CDK2 @ 3 (4.692024128), YAP1 @ 8 (4.590383402), INSR @ 10 (4.567054143), EGFR @ 18 (4.255273461), TP53 @ 29 (4.011818792), CDK1 @ 36 (3.960479767), CTNNB1 @ 42 (3.926547961), CBX5 @ 60 (3.848006823), TERF1 @ 65 (3.835912394), ERBB2 @ 67 (3.830356053), NPM1 @ 70 (3.818434018), SRC @ 72 (3.815262485)	NFATC1	315	3.27681	GATA4 @ 1 (5), EP300 @ 3 (4.566455535), TP53 @ 7 (4.263878027), SMARCA4 @ 27 (4.004652833), HDAC2 @ 31 (3.989763953), FOXP3 @ 34 (3.966832631), JUN @ 42 (3.928420791), HDAC1 @ 45 (3.875037284), PRKACA @ 69 (3.762362936), H3-4 @ 88 (3.699941274)
ELANE	371	3.16225	MPO @ 25 (4.049897784)	HLA-B	321	3.27174	RPS26 @ 4 (4.467848456), MAPRE1 @ 6 (4.289142824), SRC @ 32 (3.98269232), STAT1 @ 72 (3.759329862), NPM1 @ 79 (3.723229211), RAB7A @ 91 (3.694059873)
CREB1	372	3.16206	YAP1 @ 8 (4.590383402), TP53 @ 29 (4.011818792), CDK1 @ 36 (3.960479767), CTNNB1 @ 42 (3.926547961), EP300 @ 44 (3.908165976), FHL2 @ 82 (3.784994951), FOXO1 @ 90 (3.74627242), STAT3 @ 92 (3.744179493)	CREB1	340	3.2481	EP300 @ 3 (4.566455535), TP53 @ 7 (4.263878027), XRCC1 @ 9 (4.232647006), BRCA1 @ 14 (4.109727894), YAP1 @ 15 (4.103703234), CDK1 @ 18 (4.078436677), NRF1 @ 22 (4.046253517), CTNNB1 @ 23 (4.032609254), NFKB1 @ 24 (4.021122149), SMARCA4 @ 27 (4.004652833), HDAC2 @ 31 (3.989763953), JUN @ 42 (3.928420791), HDAC1 @ 45 (3.875037284), SOX9 @ 50 (3.856009024), MYC @ 56 (3.825986802), ATM @ 59 (3.803938…
BTRC	375	3.15995	YAP1 @ 8 (4.590383402), TP53 @ 29 (4.011818792), CTBP1 @ 34 (3.965358784), CDK1 @ 36 (3.960479767), CTNNB1 @ 42 (3.926547961), EP300 @ 44 (3.908165976), HSP90AB1 @ 47 (3.89559168), HRAS @ 55 (3.85675947), UBA52 @ 58 (3.849143067), RPS27A @ 64 (3.841632945), TERF1 @ 65 (3.835912394), LEF1 @ 87 (3.764766052)	PPP2R1A	344	3.24517	TP53 @ 7 (4.263878027), EGFR @ 8 (4.259252678), CHEK2 @ 10 (4.196264648), ELAVL1 @ 12 (4.178507033), YAP1 @ 15 (4.103703234), CDK1 @ 18 (4.078436677), NRF1 @ 22 (4.046253517), CTNNB1 @ 23 (4.032609254), NFKB1 @ 24 (4.021122149), JUN @ 42 (3.928420791), HDAC1 @ 45 (3.875037284), ERBB2 @ 53 (3.843354357), RELA @ 55 (3.832644555), TRAF6 @ 60 (3.802540496), NPM1 @ 79 (3.723229211), AKT1 @ 82 (3.71671…
UBC	386	3.15136	CDK2 @ 3 (4.692024128), TBP @ 13 (4.487899762), EGFR @ 18 (4.255273461), TP53 @ 29 (4.011818792), EP300 @ 44 (3.908165976), HSP90AB1 @ 47 (3.89559168), UBA52 @ 58 (3.849143067), RPS27A @ 64 (3.841632945)	ISG15	351	3.2395	RPS26 @ 4 (4.467848456), ELAVL1 @ 12 (4.178507033), CTNNB1 @ 23 (4.032609254), NFKB1 @ 24 (4.021122149), RPS27A @ 35 (3.95946954), IRF1 @ 39 (3.937384347), UBA52 @ 41 (3.930125003), STAT1 @ 72 (3.759329862), HSP90AB1 @ 77 (3.725182879), XRCC6 @ 80 (3.718531754), HSP90AA1 @ 87 (3.706481498), CLTC @ 98 (3.665966184)
PTK2	401	3.13784	ERBB3 @ 1 (5), INSR @ 10 (4.567054143), EGFR @ 18 (4.255273461), GRB2 @ 21 (4.184991908), IGF1R @ 23 (4.061111546), CDH1 @ 26 (4.048973937), TP53 @ 29 (4.011818792), CTNNB1 @ 42 (3.926547961), KRAS @ 43 (3.922588159), HSP90AB1 @ 47 (3.89559168), PIK3CA @ 49 (3.87790566), PIK3R2 @ 57 (3.849769814), TERF1 @ 65 (3.835912394), ERBB2 @ 67 (3.830356053), SRC @ 72 (3.815262485), PLCG1 @ 73 (3.813392608)…	PIK3R2	353	3.23769	ERBB3 @ 2 (4.731127927), EGFR @ 8 (4.259252678), APP @ 20 (4.06357256), ERBB4 @ 29 (3.99164713), SRC @ 32 (3.98269232), ERBB2 @ 53 (3.843354357), AR @ 64 (3.786837043), GRB2 @ 65 (3.770730971), STAT3 @ 75 (3.739433125), AKT1 @ 82 (3.716718023), YWHAB @ 93 (3.686814642), ESR1 @ 95 (3.677494751)
MASP1	402	3.13629	ERBB3 @ 1 (5), GRK2 @ 45 (3.906377942)	EEF1A1	361	3.22097	EP300 @ 3 (4.566455535), RPS26 @ 4 (4.467848456), EGFR @ 8 (4.259252678), NRF1 @ 22 (4.046253517), NFKB1 @ 24 (4.021122149), H2AX @ 33 (3.978872976), RPS27A @ 35 (3.95946954), ZBTB16 @ 38 (3.943619187), UBA52 @ 41 (3.930125003), JUN @ 42 (3.928420791), MDM2 @ 47 (3.863162591), GRB2 @ 65 (3.770730971), HSP90AB1 @ 77 (3.725182879), NPM1 @ 79 (3.723229211), HSP90AA1 @ 87 (3.706481498), CDK2 @ 89 (3.…
IKBKG	436	3.1144	CDK2 @ 3 (4.692024128), EGFR @ 18 (4.255273461), MUC1 @ 46 (3.897446897), HSP90AB1 @ 47 (3.89559168), UBA52 @ 58 (3.849143067), RPS27A @ 64 (3.841632945), CLTC @ 68 (3.829350917), SRC @ 72 (3.815262485)	BTRC	378	3.21029	EP300 @ 3 (4.566455535), TP53 @ 7 (4.263878027), ELAVL1 @ 12 (4.178507033), YAP1 @ 15 (4.103703234), CDK1 @ 18 (4.078436677), NRF1 @ 22 (4.046253517), CTNNB1 @ 23 (4.032609254), NFKB1 @ 24 (4.021122149), RPS27A @ 35 (3.95946954), UBA52 @ 41 (3.930125003), MDM2 @ 47 (3.863162591), EZH2 @ 49 (3.859099803), RELA @ 55 (3.832644555), MYC @ 56 (3.825986802), PRKACA @ 69 (3.762362936), HSP90AB1 @ 77 (3.…
CCT8	443	3.1117	CDK2 @ 3 (4.692024128), GRB2 @ 21 (4.184991908), TP53 @ 29 (4.011818792), HSP90AB1 @ 47 (3.89559168), GNB1 @ 80 (3.788808915), APP @ 91 (3.745785722)	RAB3A	383	3.20539	EGFR @ 8 (4.259252678), APP @ 20 (4.06357256)
PIN1	444	3.1102	CDK2 @ 3 (4.692024128), YAP1 @ 8 (4.590383402), IKZF3 @ 16 (4.29678545), IKZF1 @ 28 (4.018602888), TP53 @ 29 (4.011818792), CDK1 @ 36 (3.960479767), CTNNB1 @ 42 (3.926547961), EP300 @ 44 (3.908165976), ERBB2 @ 67 (3.830356053), SHC1 @ 89 (3.749321692), APP @ 91 (3.745785722), STAT3 @ 92 (3.744179493), GPHN @ 95 (3.735885107)	POLR2F	384	3.20521	APP @ 20 (4.06357256), NRF1 @ 22 (4.046253517), H3C13 @ 28 (3.995298939), UBA52 @ 41 (3.930125003), H4C6 @ 52 (3.853376106), H3-3B @ 54 (3.833825465), ERCC6 @ 63 (3.791796078), KEAP1 @ 83 (3.711971154), MED1 @ 84 (3.711224374)
CASP9	450	3.10337	PTCH1 @ 24 (4.060915524), CDK1 @ 36 (3.960479767), CYCS @ 81 (3.787614979)	NFKBIA	388	3.19951	EP300 @ 3 (4.566455535), TP53 @ 7 (4.263878027), NFKB1 @ 24 (4.021122149), IKZF4 @ 25 (4.018444209), HDAC2 @ 31 (3.989763953), SRC @ 32 (3.98269232), RPS27A @ 35 (3.95946954), UBA52 @ 41 (3.930125003), JUN @ 42 (3.928420791), HDAC1 @ 45 (3.875037284), RELA @ 55 (3.832644555), TRAF6 @ 60 (3.802540496), PRKACA @ 69 (3.762362936), STAT1 @ 72 (3.759329862), STAT3 @ 75 (3.739433125), AKT1 @ 82 (3.7167…
RAB7A	462	3.09371	RAB5B @ 78 (3.79689129)	POLR2E	390	3.19693	BRCA1 @ 14 (4.109727894), H3C13 @ 28 (3.995298939), HDAC2 @ 31 (3.989763953), UBA52 @ 41 (3.930125003), JUN @ 42 (3.928420791), CDH1 @ 48 (3.861344958), H4C6 @ 52 (3.853376106), SIRT1 @ 61 (3.802094612), ERCC6 @ 63 (3.791796078), NPM1 @ 79 (3.723229211), MED1 @ 84 (3.711224374), HSP90AA1 @ 87 (3.706481498)
TRAF6	464	3.09204	RPS26 @ 4 (4.685311238), EGFR @ 18 (4.255273461), RUNX1 @ 19 (4.230547681), IGF1R @ 23 (4.061111546), TP53 @ 29 (4.011818792), PIK3CA @ 49 (3.87790566), UBA52 @ 58 (3.849143067), RPS27A @ 64 (3.841632945), NPM1 @ 70 (3.818434018), SRC @ 72 (3.815262485), CYCS @ 81 (3.787614979), FHL2 @ 82 (3.784994951), APP @ 91 (3.745785722), STAT3 @ 92 (3.744179493)	ACTG1	406	3.18526	BRCA1 @ 14 (4.109727894), NFKB1 @ 24 (4.021122149), SMARCA4 @ 27 (4.004652833), CDH1 @ 48 (3.861344958), EZH2 @ 49 (3.859099803), RELA @ 55 (3.832644555), MYC @ 56 (3.825986802), TRAF6 @ 60 (3.802540496), GRB2 @ 65 (3.770730971), HSP90AB1 @ 77 (3.725182879), HSP90AA1 @ 87 (3.706481498), CDK2 @ 89 (3.699623682), POU5F1 @ 90 (3.694597021)
PRKACG	466	3.09064	IGF1R @ 23 (4.061111546), GNAS @ 27 (4.026244404), CTNNB1 @ 42 (3.926547961), EP300 @ 44 (3.908165976), GNB1 @ 80 (3.788808915), FOXO1 @ 90 (3.74627242)	MAPK8	412	3.17778	EP300 @ 3 (4.566455535), TP53 @ 7 (4.263878027), EGFR @ 8 (4.259252678), BRCA1 @ 14 (4.109727894), APP @ 20 (4.06357256), CTNNB1 @ 23 (4.032609254), NFKB1 @ 24 (4.021122149), SRC @ 32 (3.98269232), H2AX @ 33 (3.978872976), YWHAE @ 37 (3.946570154), ZBTB16 @ 38 (3.943619187), JUN @ 42 (3.928420791), HDAC1 @ 45 (3.875037284), RELA @ 55 (3.832644555), MYC @ 56 (3.825986802), ATM @ 59 (3.803938404), …
MMP9	476	3.08381	CDH1 @ 26 (4.048973937), CTNNB1 @ 42 (3.926547961), SRC @ 72 (3.815262485), STAT3 @ 92 (3.744179493)	VCP	424	3.17053	TP53 @ 7 (4.263878027), CHEK2 @ 10 (4.196264648), ELAVL1 @ 12 (4.178507033), BRCA1 @ 14 (4.109727894), CDK1 @ 18 (4.078436677), SRC @ 32 (3.98269232), RPS27A @ 35 (3.95946954), YWHAE @ 37 (3.946570154), UBA52 @ 41 (3.930125003), JUN @ 42 (3.928420791), MDM2 @ 47 (3.863162591), EZH2 @ 49 (3.859099803), ATM @ 59 (3.803938404), TRAF6 @ 60 (3.802540496), AR @ 64 (3.786837043), GRB2 @ 65 (3.770730971)…
XRCC6	488	3.07911	CDK2 @ 3 (4.692024128), EGFR @ 18 (4.255273461), GRB2 @ 21 (4.184991908), TP53 @ 29 (4.011818792), CDK1 @ 36 (3.960479767), EP300 @ 44 (3.908165976), TERF2 @ 48 (3.885006348), CBX5 @ 60 (3.848006823), TERF1 @ 65 (3.835912394), CLTC @ 68 (3.829350917)	POLR2L	437	3.15771	CHEK2 @ 10 (4.196264648), H3C13 @ 28 (3.995298939), UBA52 @ 41 (3.930125003), H4C6 @ 52 (3.853376106), ERCC6 @ 63 (3.791796078), MED1 @ 84 (3.711224374)
MAPKAPK2	491	3.07077	TP53 @ 29 (4.011818792), SHC1 @ 89 (3.749321692), STAT3 @ 92 (3.744179493)	CDC42	451	3.13976	TP53 @ 7 (4.263878027), EGFR @ 8 (4.259252678), ELAVL1 @ 12 (4.178507033), NRF1 @ 22 (4.046253517), CTNNB1 @ 23 (4.032609254), SRC @ 32 (3.98269232), JUN @ 42 (3.928420791), RAB35 @ 44 (3.880783612), CDH1 @ 48 (3.861344958), ERBB2 @ 53 (3.843354357), MYC @ 56 (3.825986802), TRAF6 @ 60 (3.802540496), GRB2 @ 65 (3.770730971), AKT1 @ 82 (3.716718023), RAD51 @ 85 (3.708628165)
PRKCD	492	3.06963	INSR @ 10 (4.567054143), EGFR @ 18 (4.255273461), IGF1R @ 23 (4.061111546), TP53 @ 29 (4.011818792), CTNNB1 @ 42 (3.926547961), EP300 @ 44 (3.908165976), GRK2 @ 45 (3.906377942), MUC1 @ 46 (3.897446897), HSP90AB1 @ 47 (3.89559168), PIK3CA @ 49 (3.87790566), PIK3R2 @ 57 (3.849769814), NPM1 @ 70 (3.818434018), SRC @ 72 (3.815262485), PLCG1 @ 73 (3.813392608), YWHAB @ 75 (3.807771122), PIK3CD @ 76 (…	ATG5	456	3.13563	ELAVL1 @ 12 (4.178507033), NRF1 @ 22 (4.046253517), SIRT1 @ 61 (3.802094612), AKT1 @ 82 (3.716718023), KEAP1 @ 83 (3.711971154), RAB7A @ 91 (3.694059873)
ORMDL3	503	3.06507	IKZF3 @ 16 (4.29678545), APP @ 91 (3.745785722)	POLR2H	462	3.12832	BRCA1 @ 14 (4.109727894), NRF1 @ 22 (4.046253517), H3C13 @ 28 (3.995298939), UBA52 @ 41 (3.930125003), H4C6 @ 52 (3.853376106), TRAF6 @ 60 (3.802540496), ERCC6 @ 63 (3.791796078), DNMT3B @ 66 (3.768542304), MED1 @ 84 (3.711224374)
C3	506	3.06237	MPO @ 25 (4.049897784), APP @ 91 (3.745785722)	HSPA8	466	3.12286	TP53 @ 7 (4.263878027), EGFR @ 8 (4.259252678), BRCA1 @ 14 (4.109727894), APP @ 20 (4.06357256), NRF1 @ 22 (4.046253517), CTNNB1 @ 23 (4.032609254), NFKB1 @ 24 (4.021122149), RPS27A @ 35 (3.95946954), YWHAE @ 37 (3.946570154), CDK9 @ 40 (3.936164117), UBA52 @ 41 (3.930125003), JUN @ 42 (3.928420791), MDM2 @ 47 (3.863162591), CDH1 @ 48 (3.861344958), RELA @ 55 (3.832644555), MYC @ 56 (3.825986802)…
CYBB	512	3.05735	MPO @ 25 (4.049897784), SRC @ 72 (3.815262485)	DSP	487	3.10812	MAPRE1 @ 6 (4.289142824), RAB5B @ 21 (4.053134222), CTNNB1 @ 23 (4.032609254), NFKB1 @ 24 (4.021122149), CDH1 @ 48 (3.861344958), MYC @ 56 (3.825986802), PRKACA @ 69 (3.762362936), CDK2 @ 89 (3.699623682)
KPNB1	527	3.0489	CDK2 @ 3 (4.692024128), EGFR @ 18 (4.255273461), KPNA2 @ 20 (4.185288434), TP53 @ 29 (4.011818792), YWHAE @ 31 (4.000171791), TERF2 @ 48 (3.885006348), TERF1 @ 65 (3.835912394), ERBB2 @ 67 (3.830356053), CLTC @ 68 (3.829350917), NPM1 @ 70 (3.818434018)	MUC4	505	3.09277	ERBB3 @ 2 (4.731127927), EGFR @ 8 (4.259252678), ERBB2 @ 53 (3.843354357)
RAC1	530	3.04789	CDK2 @ 3 (4.692024128), RAB35 @ 17 (4.272343404), KPNA2 @ 20 (4.185288434), CTNNB1 @ 42 (3.926547961), PIK3CA @ 49 (3.87790566), CLTC @ 68 (3.829350917), SRC @ 72 (3.815262485), PLCG1 @ 73 (3.813392608), STAT3 @ 92 (3.744179493)	PA2G4	511	3.08699	ERBB3 @ 2 (4.731127927), RPS26 @ 4 (4.467848456), HDAC2 @ 31 (3.989763953), RPS27A @ 35 (3.95946954), UBA52 @ 41 (3.930125003), JUN @ 42 (3.928420791), MDM2 @ 47 (3.863162591), TRAF6 @ 60 (3.802540496), AR @ 64 (3.786837043), NPM1 @ 79 (3.723229211), AKT1 @ 82 (3.716718023), MED1 @ 84 (3.711224374), CDK2 @ 89 (3.699623682)
LYN	531	3.04754	CDK2 @ 3 (4.692024128), EGFR @ 18 (4.255273461), GRB2 @ 21 (4.184991908), TP53 @ 29 (4.011818792), CDK1 @ 36 (3.960479767), NRAS @ 41 (3.934319021), KRAS @ 43 (3.922588159), MUC1 @ 46 (3.897446897), HSP90AB1 @ 47 (3.89559168), PIK3CA @ 49 (3.87790566), HRAS @ 55 (3.85675947), PIK3R2 @ 57 (3.849769814), SRC @ 72 (3.815262485), PLCG1 @ 73 (3.813392608), PIK3CD @ 76 (3.806903236), PIK3CB @ 79 (3.788…	PRKACG	529	3.07681	EP300 @ 3 (4.566455535), CTNNB1 @ 23 (4.032609254), NFKB1 @ 24 (4.021122149), JUN @ 42 (3.928420791), SOX9 @ 50 (3.856009024), RELA @ 55 (3.832644555), AR @ 64 (3.786837043), PRKACA @ 69 (3.762362936), MED1 @ 84 (3.711224374), ESR1 @ 95 (3.677494751)
CAND1	537	3.04168	CDK2 @ 3 (4.692024128), TBP @ 13 (4.487899762), KPNA2 @ 20 (4.185288434), HSP90AB1 @ 47 (3.89559168), RPS27A @ 64 (3.841632945), CLTC @ 68 (3.829350917), NPM1 @ 70 (3.818434018)	IGKV1D-33	540	3.07068	ERBB3 @ 2 (4.731127927), EGFR @ 8 (4.259252678), ERBB2 @ 53 (3.843354357)
HSPA8	538	3.04164	CDK2 @ 3 (4.692024128), EGFR @ 18 (4.255273461), GRB2 @ 21 (4.184991908), CDH1 @ 26 (4.048973937), TP53 @ 29 (4.011818792), YWHAE @ 31 (4.000171791), CTNNB1 @ 42 (3.926547961), GRK2 @ 45 (3.906377942), HSP90AB1 @ 47 (3.89559168), PIK3R2 @ 57 (3.849769814), UBA52 @ 58 (3.849143067), RPS27A @ 64 (3.841632945), CLTC @ 68 (3.829350917), CYCS @ 81 (3.787614979), FANCC @ 83 (3.776114382), SHC1 @ 89 (3.…	IGKV1-33	552	3.05954	ERBB3 @ 2 (4.731127927), EGFR @ 8 (4.259252678), ERBB2 @ 53 (3.843354357)
ISG15	542	3.03789	RPS26 @ 4 (4.685311238), SIN3A @ 33 (3.966211795), CTNNB1 @ 42 (3.926547961), HSP90AB1 @ 47 (3.89559168), UBA52 @ 58 (3.849143067), RPS27A @ 64 (3.841632945), CLTC @ 68 (3.829350917)	LCK	553	3.05921	EGFR @ 8 (4.259252678), SRC @ 32 (3.98269232), FOXP3 @ 34 (3.966832631), TRAF6 @ 60 (3.802540496), AR @ 64 (3.786837043), GRB2 @ 65 (3.770730971), PRKACA @ 69 (3.762362936), STAT1 @ 72 (3.759329862), STAT3 @ 75 (3.739433125), HSP90AB1 @ 77 (3.725182879), AKT1 @ 82 (3.716718023), HSP90AA1 @ 87 (3.706481498), ESR1 @ 95 (3.677494751)
VAV1	546	3.03552	ERBB3 @ 1 (5), INSR @ 10 (4.567054143), EGFR @ 18 (4.255273461), GRB2 @ 21 (4.184991908), PIK3CA @ 49 (3.87790566), HRAS @ 55 (3.85675947), PIK3R2 @ 57 (3.849769814), ERBB2 @ 67 (3.830356053), SRC @ 72 (3.815262485), PLCG1 @ 73 (3.813392608), PIK3CD @ 76 (3.806903236), PIK3CB @ 79 (3.788819698), PIK3R3 @ 88 (3.750814494), SHC1 @ 89 (3.749321692), PLCG2 @ 98 (3.731445794)	SHC1	563	3.05072	ERBB3 @ 2 (4.731127927), EGFR @ 8 (4.259252678), APP @ 20 (4.06357256), NRF1 @ 22 (4.046253517), ERBB4 @ 29 (3.99164713), SRC @ 32 (3.98269232), ERBB2 @ 53 (3.843354357), AR @ 64 (3.786837043), GRB2 @ 65 (3.770730971), STAT3 @ 75 (3.739433125), HSP90AB1 @ 77 (3.725182879), NPM1 @ 79 (3.723229211), AKT1 @ 82 (3.716718023), HSP90AA1 @ 87 (3.706481498), ESR1 @ 95 (3.677494751), CLTC @ 98 (3.66596618…
EEA1	558	3.03001	EGFR @ 18 (4.255273461), IGF1R @ 23 (4.061111546), ERBB2 @ 67 (3.830356053), RAB5B @ 78 (3.79689129)	TUBB	582	3.03368	MAPRE1 @ 6 (4.289142824), TP53 @ 7 (4.263878027), EGFR @ 8 (4.259252678), ELAVL1 @ 12 (4.178507033), BRCA1 @ 14 (4.109727894), APP @ 20 (4.06357256), NRF1 @ 22 (4.046253517), NFKB1 @ 24 (4.021122149), YWHAE @ 37 (3.946570154), CDK9 @ 40 (3.936164117), UBA52 @ 41 (3.930125003), JUN @ 42 (3.928420791), MDM2 @ 47 (3.863162591), RELA @ 55 (3.832644555), MYC @ 56 (3.825986802), TRAF6 @ 60 (3.802540496…
TUBB	566	3.02211	CDK2 @ 3 (4.692024128), EGFR @ 18 (4.255273461), GRB2 @ 21 (4.184991908), TP53 @ 29 (4.011818792), YWHAE @ 31 (4.000171791), GRK2 @ 45 (3.906377942), PIK3R2 @ 57 (3.849769814), UBA52 @ 58 (3.849143067), CBX5 @ 60 (3.848006823), YWHAB @ 75 (3.807771122), SHC1 @ 89 (3.749321692), APP @ 91 (3.745785722)	PIK3R4	583	3.03312	MAPRE1 @ 6 (4.289142824), YWHAE @ 37 (3.946570154), YWHAB @ 93 (3.686814642)
TXK	570	3.01844	ERBB3 @ 1 (5), GRB2 @ 21 (4.184991908), PIK3CA @ 49 (3.87790566), PIK3R2 @ 57 (3.849769814), ERBB2 @ 67 (3.830356053), SRC @ 72 (3.815262485), PLCG1 @ 73 (3.813392608), PIK3CD @ 76 (3.806903236), PIK3CB @ 79 (3.788819698), PIK3R3 @ 88 (3.750814494), SHC1 @ 89 (3.749321692)	POLR2K	605	3.01869	BRCA1 @ 14 (4.109727894), APP @ 20 (4.06357256), H3C13 @ 28 (3.995298939), UBA52 @ 41 (3.930125003), H4C6 @ 52 (3.853376106), ERCC6 @ 63 (3.791796078), MED1 @ 84 (3.711224374)
B2M	583	3.00811	ERBB3 @ 1 (5), GRB2 @ 21 (4.184991908), APP @ 91 (3.745785722), INS @ 94 (3.741981928)	PLCG2	618	3.01034	ERBB3 @ 2 (4.731127927), TP53 @ 7 (4.263878027), EGFR @ 8 (4.259252678), ERBB4 @ 29 (3.99164713), SRC @ 32 (3.98269232), ERBB2 @ 53 (3.843354357), AR @ 64 (3.786837043), GRB2 @ 65 (3.770730971), STAT3 @ 75 (3.739433125), NPM1 @ 79 (3.723229211)
SYK	594	3.00175	ERBB3 @ 1 (5), EGFR @ 18 (4.255273461), GRB2 @ 21 (4.184991908), IKZF1 @ 28 (4.018602888), NRAS @ 41 (3.934319021), KRAS @ 43 (3.922588159), PIK3CA @ 49 (3.87790566), HRAS @ 55 (3.85675947), PIK3R2 @ 57 (3.849769814), TERF1 @ 65 (3.835912394), ERBB2 @ 67 (3.830356053), SRC @ 72 (3.815262485), PLCG1 @ 73 (3.813392608), PIK3CD @ 76 (3.806903236), PIK3CB @ 79 (3.788819698), FHL2 @ 82 (3.784994951), …	CAND1	623	3.0072	XRCC1 @ 9 (4.232647006), ELAVL1 @ 12 (4.178507033), KPNA2 @ 16 (4.098579501), SMARCA4 @ 27 (4.004652833), RPS27A @ 35 (3.95946954), JUN @ 42 (3.928420791), ERCC6 @ 63 (3.791796078), STAT1 @ 72 (3.759329862), HSP90AB1 @ 77 (3.725182879), NPM1 @ 79 (3.723229211), XRCC6 @ 80 (3.718531754), HSP90AA1 @ 87 (3.706481498), CDK2 @ 89 (3.699623682), LARP7 @ 96 (3.6762156), CLTC @ 98 (3.665966184)
FBXW11	602	2.9953	YAP1 @ 8 (4.590383402), YWHAE @ 31 (4.000171791), CTNNB1 @ 42 (3.926547961), HSP90AB1 @ 47 (3.89559168), CLTC @ 68 (3.829350917)	MAPK14	624	3.00691	EP300 @ 3 (4.566455535), TP53 @ 7 (4.263878027), EGFR @ 8 (4.259252678), ELAVL1 @ 12 (4.178507033), CTNNB1 @ 23 (4.032609254), NFKB1 @ 24 (4.021122149), SRC @ 32 (3.98269232), UBA52 @ 41 (3.930125003), JUN @ 42 (3.928420791), EZH2 @ 49 (3.859099803), RELA @ 55 (3.832644555), MYC @ 56 (3.825986802), ATM @ 59 (3.803938404), TRAF6 @ 60 (3.802540496), AR @ 64 (3.786837043), GRB2 @ 65 (3.770730971), S…
MUC7	611	2.99064	MUC1 @ 46 (3.897446897), MUC4 @ 97 (3.732637271)	IKBKE	626	3.00505	MAPRE1 @ 6 (4.289142824), NFKB1 @ 24 (4.021122149), SMARCA4 @ 27 (4.004652833), HDAC2 @ 31 (3.989763953), IRF1 @ 39 (3.937384347), RELA @ 55 (3.832644555), TRAF6 @ 60 (3.802540496), GRB2 @ 65 (3.770730971), STAT1 @ 72 (3.759329862), HSP90AB1 @ 77 (3.725182879), NPM1 @ 79 (3.723229211), AKT1 @ 82 (3.716718023), HSP90AA1 @ 87 (3.706481498), RAB7A @ 91 (3.694059873), ESR1 @ 95 (3.677494751), CLTC @ …
BCL2	620	2.98791	CDK2 @ 3 (4.692024128), TP53 @ 29 (4.011818792), CDK1 @ 36 (3.960479767), FOXP3 @ 40 (3.94032475), NRAS @ 41 (3.934319021), KRAS @ 43 (3.922588159), EP300 @ 44 (3.908165976), HRAS @ 55 (3.85675947), CYCS @ 81 (3.787614979), STAT3 @ 92 (3.744179493)	DYNLL1	649	2.98747	CDK1 @ 18 (4.078436677), NRF1 @ 22 (4.046253517), GRB2 @ 65 (3.770730971), PRKACA @ 69 (3.762362936), TP53BP1 @ 78 (3.725074195), HSP90AA1 @ 87 (3.706481498)
POLR2F	625	2.98264	TBP @ 13 (4.487899762), GTF2A2 @ 14 (4.450875194), GTF2B @ 15 (4.432465953), UBA52 @ 58 (3.849143067), APP @ 91 (3.745785722)	NCK1	653	2.98603	ERBB3 @ 2 (4.731127927), EGFR @ 8 (4.259252678), BRCA1 @ 14 (4.109727894), SRC @ 32 (3.98269232), UBA52 @ 41 (3.930125003), GRB2 @ 65 (3.770730971), AKT1 @ 82 (3.716718023)
CDA	628	2.98175	KPNA2 @ 20 (4.185288434), PAPSS2 @ 22 (4.109209196), PAPSS1 @ 54 (3.85901715)	IKBKG	662	2.98312	EGFR @ 8 (4.259252678), NFKB1 @ 24 (4.021122149), SRC @ 32 (3.98269232), RPS27A @ 35 (3.95946954), UBA52 @ 41 (3.930125003), RELA @ 55 (3.832644555), MYC @ 56 (3.825986802), ATM @ 59 (3.803938404), TRAF6 @ 60 (3.802540496), HSP90AB1 @ 77 (3.725182879), AKT1 @ 82 (3.716718023), KEAP1 @ 83 (3.711971154), HSP90AA1 @ 87 (3.706481498), CDK2 @ 89 (3.699623682), CLTC @ 98 (3.665966184)
CASP2	634	2.97648	KPNA2 @ 20 (4.185288434), GRB2 @ 21 (4.184991908), ADCYAP1 @ 32 (3.997515734)	CRK	674	2.97422	ERBB3 @ 2 (4.731127927), TP53 @ 7 (4.263878027), EGFR @ 8 (4.259252678), LIG3 @ 13 (4.116238444), NRF1 @ 22 (4.046253517), ERBB4 @ 29 (3.99164713), SRC @ 32 (3.98269232), YWHAE @ 37 (3.946570154), ERBB2 @ 53 (3.843354357), AR @ 64 (3.786837043), GRB2 @ 65 (3.770730971), HSP90AB1 @ 77 (3.725182879), AKT1 @ 82 (3.716718023), HSP90AA1 @ 87 (3.706481498)
POLR2E	660	2.96595	TBP @ 13 (4.487899762), GTF2A2 @ 14 (4.450875194), GTF2B @ 15 (4.432465953), CDH1 @ 26 (4.048973937), UBA52 @ 58 (3.849143067), NPM1 @ 70 (3.818434018)	IQGAP1	687	2.96692	EGFR @ 8 (4.259252678), YAP1 @ 15 (4.103703234), CTNNB1 @ 23 (4.032609254), SRC @ 32 (3.98269232), JUN @ 42 (3.928420791), CDH1 @ 48 (3.861344958), ERBB2 @ 53 (3.843354357), MYC @ 56 (3.825986802), GRB2 @ 65 (3.770730971), PRKACA @ 69 (3.762362936), HSP90AB1 @ 77 (3.725182879), AKT1 @ 82 (3.716718023), CDK2 @ 89 (3.699623682), ESR1 @ 95 (3.677494751)
ANXA2	668	2.96205	ERBB3 @ 1 (5), CDK2 @ 3 (4.692024128), EGFR @ 18 (4.255273461), GRB2 @ 21 (4.184991908), TP53 @ 29 (4.011818792), EP300 @ 44 (3.908165976), TERF1 @ 65 (3.835912394), ERBB2 @ 67 (3.830356053), NPM1 @ 70 (3.818434018), SRC @ 72 (3.815262485), SHC1 @ 89 (3.749321692), APP @ 91 (3.745785722)	SYK	692	2.96411	ERBB3 @ 2 (4.731127927), EGFR @ 8 (4.259252678), APP @ 20 (4.06357256), NFKB1 @ 24 (4.021122149), ERBB4 @ 29 (3.99164713), HDAC2 @ 31 (3.989763953), SRC @ 32 (3.98269232), HDAC1 @ 45 (3.875037284), MDM2 @ 47 (3.863162591), ERBB2 @ 53 (3.843354357), TRAF6 @ 60 (3.802540496), AR @ 64 (3.786837043), GRB2 @ 65 (3.770730971), STAT1 @ 72 (3.759329862), STAT3 @ 75 (3.739433125)
VAV2	669	2.96123	ERBB3 @ 1 (5), EGFR @ 18 (4.255273461), GRB2 @ 21 (4.184991908), PIK3CA @ 49 (3.87790566), PIK3R2 @ 57 (3.849769814), ERBB2 @ 67 (3.830356053), SRC @ 72 (3.815262485), PLCG1 @ 73 (3.813392608), PIK3CD @ 76 (3.806903236), PIK3CB @ 79 (3.788819698), PIK3R3 @ 88 (3.750814494), PLCG2 @ 98 (3.731445794)	CD44	707	2.95325	EP300 @ 3 (4.566455535), TP53 @ 7 (4.263878027), EGFR @ 8 (4.259252678), ELAVL1 @ 12 (4.178507033), ERBB4 @ 29 (3.99164713), SRC @ 32 (3.98269232), ERBB2 @ 53 (3.843354357), MYC @ 56 (3.825986802), TRAF6 @ 60 (3.802540496), PRKACA @ 69 (3.762362936), STAT1 @ 72 (3.759329862), STAT3 @ 75 (3.739433125), AKT1 @ 82 (3.716718023)
PPP2R1A	673	2.95854	YAP1 @ 8 (4.590383402), EGFR @ 18 (4.255273461), TP53 @ 29 (4.011818792), CDK1 @ 36 (3.960479767), CTNNB1 @ 42 (3.926547961), KRAS @ 43 (3.922588159), ERBB2 @ 67 (3.830356053), NPM1 @ 70 (3.818434018), YWHAB @ 75 (3.807771122)	AHCYL1	714	2.94854	ELAVL1 @ 12 (4.178507033), YAP1 @ 15 (4.103703234), UBA52 @ 41 (3.930125003), JUN @ 42 (3.928420791), DNMT3B @ 66 (3.768542304), SOX2 @ 70 (3.761055665)
PRTN3	675	2.95481	MPO @ 25 (4.049897784)	CD247	727	2.93951	RPS26 @ 4 (4.467848456), SRC @ 32 (3.98269232), RPS27A @ 35 (3.95946954), GRB2 @ 65 (3.770730971), HSP90AB1 @ 77 (3.725182879), NPM1 @ 79 (3.723229211), CLTC @ 98 (3.665966184)
POLR1C	691	2.9427	TBP @ 13 (4.487899762), GTF2B @ 15 (4.432465953), IKZF3 @ 16 (4.29678545)	KPNB1	728	2.93947	TP53 @ 7 (4.263878027), EGFR @ 8 (4.259252678), ELAVL1 @ 12 (4.178507033), KPNA2 @ 16 (4.098579501), YWHAE @ 37 (3.946570154), JUN @ 42 (3.928420791), SOX9 @ 50 (3.856009024), ERBB2 @ 53 (3.843354357), MYC @ 56 (3.825986802), TRAF6 @ 60 (3.802540496), TP53BP1 @ 78 (3.725074195), NPM1 @ 79 (3.723229211), CDK2 @ 89 (3.699623682), CLTC @ 98 (3.665966184)
CALML5	693	2.94192	CDK2 @ 3 (4.692024128), TP53 @ 29 (4.011818792), NRAS @ 41 (3.934319021), KRAS @ 43 (3.922588159), HSP90AB1 @ 47 (3.89559168), HRAS @ 55 (3.85675947), SRC @ 72 (3.815262485), PLCG1 @ 73 (3.813392608), PLCG2 @ 98 (3.731445794)	IRF3	734	2.9356	EP300 @ 3 (4.566455535), NRF1 @ 22 (4.046253517), CTNNB1 @ 23 (4.032609254), NFKB1 @ 24 (4.021122149), IRF1 @ 39 (3.937384347), JUN @ 42 (3.928420791), RELA @ 55 (3.832644555), TRAF6 @ 60 (3.802540496), PRKACA @ 69 (3.762362936), STAT1 @ 72 (3.759329862), HSP90AB1 @ 77 (3.725182879), XRCC6 @ 80 (3.718531754), AKT1 @ 82 (3.716718023), HSP90AA1 @ 87 (3.706481498)
CDC42	699	2.93809	RAB35 @ 17 (4.272343404), EGFR @ 18 (4.255273461), GRB2 @ 21 (4.184991908), CDH1 @ 26 (4.048973937), TP53 @ 29 (4.011818792), CTNNB1 @ 42 (3.926547961), PIK3CA @ 49 (3.87790566), PIK3R2 @ 57 (3.849769814), ERBB2 @ 67 (3.830356053), SRC @ 72 (3.815262485), PIK3CD @ 76 (3.806903236), PIK3CB @ 79 (3.788819698), GNB1 @ 80 (3.788808915), PIK3R3 @ 88 (3.750814494)	HSP90B1	742	2.92821	EGFR @ 8 (4.259252678), SMARCA4 @ 27 (4.004652833), H2AX @ 33 (3.978872976), JUN @ 42 (3.928420791), MDM2 @ 47 (3.863162591), ERBB2 @ 53 (3.843354357), AR @ 64 (3.786837043), PRKACA @ 69 (3.762362936), HSP90AB1 @ 77 (3.725182879), AKT1 @ 82 (3.716718023), HSP90AA1 @ 87 (3.706481498), CDK2 @ 89 (3.699623682)
HCK	702	2.93555	ERBB3 @ 1 (5), EGFR @ 18 (4.255273461), GRB2 @ 21 (4.184991908), HSP90AB1 @ 47 (3.89559168), PIK3CA @ 49 (3.87790566), PIK3R2 @ 57 (3.849769814), SRC @ 72 (3.815262485), PLCG1 @ 73 (3.813392608), PIK3CD @ 76 (3.806903236), PIK3CB @ 79 (3.788819698), FHL2 @ 82 (3.784994951), PIK3R3 @ 88 (3.750814494), SHC1 @ 89 (3.749321692), APP @ 91 (3.745785722), STAT3 @ 92 (3.744179493), PLCG2 @ 98 (3.73144579…	RAB27A	744	2.92806	APP @ 20 (4.06357256), ZBTB16 @ 38 (3.943619187)
EEF2	703	2.93534	CDK2 @ 3 (4.692024128), RPS26 @ 4 (4.685311238), GRB2 @ 21 (4.184991908), TP53 @ 29 (4.011818792), EP300 @ 44 (3.908165976), HSP90AB1 @ 47 (3.89559168), UBA52 @ 58 (3.849143067), RPS27A @ 64 (3.841632945), NPM1 @ 70 (3.818434018)	UBE2N	745	2.92787	TP53 @ 7 (4.263878027), ELAVL1 @ 12 (4.178507033), BRCA1 @ 14 (4.109727894), NRF1 @ 22 (4.046253517), NFKB1 @ 24 (4.021122149), H2AX @ 33 (3.978872976), RPS27A @ 35 (3.95946954), UBA52 @ 41 (3.930125003), MDM2 @ 47 (3.863162591), ATM @ 59 (3.803938404), TRAF6 @ 60 (3.802540496), NBN @ 68 (3.766088409), TP53BP1 @ 78 (3.725074195), XRCC6 @ 80 (3.718531754), HSP90AA1 @ 87 (3.706481498), CDK2 @ 89 (3…
POLR2K	713	2.92544	TBP @ 13 (4.487899762), GTF2A2 @ 14 (4.450875194), GTF2B @ 15 (4.432465953), UBA52 @ 58 (3.849143067), APP @ 91 (3.745785722)	POLR1C	761	2.91776	NRF1 @ 22 (4.046253517), JUN @ 42 (3.928420791), H4C6 @ 52 (3.853376106), MED1 @ 84 (3.711224374)
MAPK8	732	2.91674	EGFR @ 18 (4.255273461), TP53 @ 29 (4.011818792), YWHAE @ 31 (4.000171791), CTBP1 @ 34 (3.965358784), NRAS @ 41 (3.934319021), CTNNB1 @ 42 (3.926547961), KRAS @ 43 (3.922588159), EP300 @ 44 (3.908165976), HRAS @ 55 (3.85675947), NPM1 @ 70 (3.818434018), SRC @ 72 (3.815262485), YWHAB @ 75 (3.807771122), SHC1 @ 89 (3.749321692), FOXO1 @ 90 (3.74627242), APP @ 91 (3.745785722), STAT3 @ 92 (3.7441794…	DYNC1H1	774	2.91166	MAPRE1 @ 6 (4.289142824), EGFR @ 8 (4.259252678), BRCA1 @ 14 (4.109727894), CDK1 @ 18 (4.078436677), NRF1 @ 22 (4.046253517), JUN @ 42 (3.928420791), MYC @ 56 (3.825986802), TRAF6 @ 60 (3.802540496), SIRT1 @ 61 (3.802094612), GRB2 @ 65 (3.770730971), HSP90AA1 @ 87 (3.706481498), CDK2 @ 89 (3.699623682), RAB7A @ 91 (3.694059873), ESR1 @ 95 (3.677494751)
IQGAP1	734	2.91542	CDK2 @ 3 (4.692024128), YAP1 @ 8 (4.590383402), EGFR @ 18 (4.255273461), GRB2 @ 21 (4.184991908), CDH1 @ 26 (4.048973937), CTNNB1 @ 42 (3.926547961), KRAS @ 43 (3.922588159), HSP90AB1 @ 47 (3.89559168), PIK3R2 @ 57 (3.849769814), ERBB2 @ 67 (3.830356053), SRC @ 72 (3.815262485), SHC1 @ 89 (3.749321692)	LYN	782	2.90342	TP53 @ 7 (4.263878027), EGFR @ 8 (4.259252678), ELAVL1 @ 12 (4.178507033), CDK1 @ 18 (4.078436677), SRC @ 32 (3.98269232), AR @ 64 (3.786837043), GRB2 @ 65 (3.770730971), STAT1 @ 72 (3.759329862), STAT3 @ 75 (3.739433125), HSP90AB1 @ 77 (3.725182879), AKT1 @ 82 (3.716718023), HSP90AA1 @ 87 (3.706481498), CDK2 @ 89 (3.699623682)
MAPK14	747	2.90956	EGFR @ 18 (4.255273461), GRB2 @ 21 (4.184991908), TP53 @ 29 (4.011818792), CTNNB1 @ 42 (3.926547961), KRAS @ 43 (3.922588159), EP300 @ 44 (3.908165976), GRK2 @ 45 (3.906377942), UBA52 @ 58 (3.849143067), SRC @ 72 (3.815262485), GNB1 @ 80 (3.788808915), SHC1 @ 89 (3.749321692), FOXO1 @ 90 (3.74627242), STAT3 @ 92 (3.744179493)	BCL2	785	2.90048	EP300 @ 3 (4.566455535), TP53 @ 7 (4.263878027), BRCA1 @ 14 (4.109727894), CDK1 @ 18 (4.078436677), NFKB1 @ 24 (4.021122149), H3C13 @ 28 (3.995298939), H3C12 @ 30 (3.990523587), FOXP3 @ 34 (3.966832631), H3-3B @ 54 (3.833825465), RELA @ 55 (3.832644555), MYC @ 56 (3.825986802), PRKACA @ 69 (3.762362936), STAT3 @ 75 (3.739433125), AKT1 @ 82 (3.716718023), KEAP1 @ 83 (3.711971154), HSP90AA1 @ 87 (3…
CD247	748	2.90886	RPS26 @ 4 (4.685311238), GRB2 @ 21 (4.184991908), HSP90AB1 @ 47 (3.89559168), RPS27A @ 64 (3.841632945), CLTC @ 68 (3.829350917), NPM1 @ 70 (3.818434018), SRC @ 72 (3.815262485), PLCG1 @ 73 (3.813392608), SHC1 @ 89 (3.749321692)	TLR4	798	2.89053	EGFR @ 8 (4.259252678), NFKB1 @ 24 (4.021122149), SRC @ 32 (3.98269232), RELA @ 55 (3.832644555), TRAF6 @ 60 (3.802540496), STAT1 @ 72 (3.759329862), STAT3 @ 75 (3.739433125), HSP90AB1 @ 77 (3.725182879), AKT1 @ 82 (3.716718023), HSP90AA1 @ 87 (3.706481498)
CTSG	754	2.90462	MPO @ 25 (4.049897784)	MYD88	808	2.88452	NFKB1 @ 24 (4.021122149), SRC @ 32 (3.98269232), YWHAE @ 37 (3.946570154), IRF1 @ 39 (3.937384347), MDM2 @ 47 (3.863162591), RELA @ 55 (3.832644555), TRAF6 @ 60 (3.802540496), AKT1 @ 82 (3.716718023), HSP90AA1 @ 87 (3.706481498)
RPS6KA1	791	2.8825	RPS26 @ 4 (4.685311238), GRB2 @ 21 (4.184991908), YWHAE @ 31 (4.000171791), NRAS @ 41 (3.934319021), KRAS @ 43 (3.922588159), HSP90AB1 @ 47 (3.89559168), HRAS @ 55 (3.85675947), NPM1 @ 70 (3.818434018), YWHAB @ 75 (3.807771122)	EEF2	813	2.8823	EP300 @ 3 (4.566455535), RPS26 @ 4 (4.467848456), TP53 @ 7 (4.263878027), RPS27A @ 35 (3.95946954), UBA52 @ 41 (3.930125003), JUN @ 42 (3.928420791), MDM2 @ 47 (3.863162591), GRB2 @ 65 (3.770730971), HSP90AB1 @ 77 (3.725182879), NPM1 @ 79 (3.723229211), XRCC6 @ 80 (3.718531754), MED1 @ 84 (3.711224374), HSP90AA1 @ 87 (3.706481498), CDK2 @ 89 (3.699623682), POU5F1 @ 90 (3.694597021)
ITCH	807	2.87244	YAP1 @ 8 (4.590383402), EGFR @ 18 (4.255273461), IGF1R @ 23 (4.061111546), TP53 @ 29 (4.011818792), UBA52 @ 58 (3.849143067), RPS27A @ 64 (3.841632945), SRC @ 72 (3.815262485), ERBB4 @ 84 (3.769879596)	MAPK9	827	2.87286	TP53 @ 7 (4.263878027), EGFR @ 8 (4.259252678), APP @ 20 (4.06357256), CTNNB1 @ 23 (4.032609254), NFKB1 @ 24 (4.021122149), SRC @ 32 (3.98269232), JUN @ 42 (3.928420791), HDAC1 @ 45 (3.875037284), MDM2 @ 47 (3.863162591), RELA @ 55 (3.832644555), MYC @ 56 (3.825986802), TRAF6 @ 60 (3.802540496), GRB2 @ 65 (3.770730971), STAT3 @ 75 (3.739433125), MED1 @ 84 (3.711224374), ESR1 @ 95 (3.677494751)
PPP2CB	810	2.87123	YAP1 @ 8 (4.590383402), EGFR @ 18 (4.255273461), TP53 @ 29 (4.011818792), NRAS @ 41 (3.934319021), KRAS @ 43 (3.922588159), CBX5 @ 60 (3.848006823), TERF1 @ 65 (3.835912394), ERBB2 @ 67 (3.830356053), SRC @ 72 (3.815262485)	CLU	855	2.85822	APP @ 20 (4.06357256), NFKB1 @ 24 (4.021122149), H2AX @ 33 (3.978872976), MDM2 @ 47 (3.863162591), GRB2 @ 65 (3.770730971), XRCC6 @ 80 (3.718531754), KEAP1 @ 83 (3.711971154)
CD4	815	2.86862	FOXP3 @ 40 (3.94032475), CTNNB1 @ 42 (3.926547961), HSP90AB1 @ 47 (3.89559168), NPM1 @ 70 (3.818434018), SRC @ 72 (3.815262485), PLCG1 @ 73 (3.813392608), STAT3 @ 92 (3.744179493), INS @ 94 (3.741981928)	UBE2D1	865	2.8543	EP300 @ 3 (4.566455535), TP53 @ 7 (4.263878027), BRCA1 @ 14 (4.109727894), YAP1 @ 15 (4.103703234), CTNNB1 @ 23 (4.032609254), RPS27A @ 35 (3.95946954), UBA52 @ 41 (3.930125003), MDM2 @ 47 (3.863162591), RELA @ 55 (3.832644555), TRAF6 @ 60 (3.802540496), NBN @ 68 (3.766088409)
RAP1A	817	2.86837	NRAS @ 41 (3.934319021), KRAS @ 43 (3.922588159), PIK3CA @ 49 (3.87790566), HRAS @ 55 (3.85675947), PIK3R2 @ 57 (3.849769814), SRC @ 72 (3.815262485), PIK3CD @ 76 (3.806903236), PIK3CB @ 79 (3.788819698), GNB1 @ 80 (3.788808915), PIK3R3 @ 88 (3.750814494)	FBXW11	868	2.85129	YAP1 @ 15 (4.103703234), CTNNB1 @ 23 (4.032609254), NFKB1 @ 24 (4.021122149), YWHAE @ 37 (3.946570154), MDM2 @ 47 (3.863162591), EZH2 @ 49 (3.859099803), RELA @ 55 (3.832644555), HSP90AB1 @ 77 (3.725182879), KEAP1 @ 83 (3.711971154), HSP90AA1 @ 87 (3.706481498), CLTC @ 98 (3.665966184)
SKP1	830	2.86392	CDK2 @ 3 (4.692024128), TP53 @ 29 (4.011818792), CTNNB1 @ 42 (3.926547961), EP300 @ 44 (3.908165976), HSP90AB1 @ 47 (3.89559168), UBA52 @ 58 (3.849143067), RPS27A @ 64 (3.841632945), TERF1 @ 65 (3.835912394)	CXCR2	871	2.84598	SRC @ 32 (3.98269232)
BCL2L1	836	2.86085	IKZF3 @ 16 (4.29678545), TP53 @ 29 (4.011818792), CDK1 @ 36 (3.960479767), CTNNB1 @ 42 (3.926547961), KRAS @ 43 (3.922588159), CYCS @ 81 (3.787614979), STAT3 @ 92 (3.744179493)	MMP9	872	2.84597	CTNNB1 @ 23 (4.032609254), SRC @ 32 (3.98269232), JUN @ 42 (3.928420791), CDH1 @ 48 (3.861344958), STAT3 @ 75 (3.739433125)
POLR2H	852	2.85394	TBP @ 13 (4.487899762), GTF2A2 @ 14 (4.450875194), GTF2B @ 15 (4.432465953), UBA52 @ 58 (3.849143067)	CHUK	883	2.83831	EP300 @ 3 (4.566455535), TP53 @ 7 (4.263878027), ELAVL1 @ 12 (4.178507033), CTNNB1 @ 23 (4.032609254), NFKB1 @ 24 (4.021122149), H3C13 @ 28 (3.995298939), H3C12 @ 30 (3.990523587), SRC @ 32 (3.98269232), H3-3B @ 54 (3.833825465), RELA @ 55 (3.832644555), MYC @ 56 (3.825986802), ATM @ 59 (3.803938404), TRAF6 @ 60 (3.802540496), HSP90AB1 @ 77 (3.725182879), AKT1 @ 82 (3.716718023), KEAP1 @ 83 (3.71…
POLR2L	866	2.84539	TBP @ 13 (4.487899762), GTF2A2 @ 14 (4.450875194), GTF2B @ 15 (4.432465953), UBA52 @ 58 (3.849143067)	PPP2CB	884	2.83702	TP53 @ 7 (4.263878027), EGFR @ 8 (4.259252678), YAP1 @ 15 (4.103703234), NFKB1 @ 24 (4.021122149), SRC @ 32 (3.98269232), ERBB2 @ 53 (3.843354357), RELA @ 55 (3.832644555), TRAF6 @ 60 (3.802540496), AKT1 @ 82 (3.716718023)
HSPA1A	876	2.84062	CDK2 @ 3 (4.692024128), EGFR @ 18 (4.255273461), GRB2 @ 21 (4.184991908), TP53 @ 29 (4.011818792), YWHAE @ 31 (4.000171791), FOXP3 @ 40 (3.94032475), CTNNB1 @ 42 (3.926547961), GRK2 @ 45 (3.906377942), HSP90AB1 @ 47 (3.89559168), PIK3R2 @ 57 (3.849769814), RPS27A @ 64 (3.841632945), CLTC @ 68 (3.829350917), YWHAB @ 75 (3.807771122), FANCC @ 83 (3.776114382), SHC1 @ 89 (3.749321692)	PTPRC	891	2.8315	EGFR @ 8 (4.259252678), CTNNB1 @ 23 (4.032609254), FOXP3 @ 34 (3.966832631), ERBB2 @ 53 (3.843354357), GRB2 @ 65 (3.770730971), STAT1 @ 72 (3.759329862)
RAB27A	886	2.83595	MADD @ 74 (3.812266803), APP @ 91 (3.745785722)	ITK	909	2.82419	ERBB3 @ 2 (4.731127927), EGFR @ 8 (4.259252678), KPNA2 @ 16 (4.098579501), SRC @ 32 (3.98269232), ERBB2 @ 53 (3.843354357), GRB2 @ 65 (3.770730971), HSP90AB1 @ 77 (3.725182879), HSP90AA1 @ 87 (3.706481498)
HSP90B1	896	2.83193	CDK2 @ 3 (4.692024128), EGFR @ 18 (4.255273461), GRK2 @ 45 (3.906377942), HSP90AB1 @ 47 (3.89559168), TERF2 @ 48 (3.885006348), TERF1 @ 65 (3.835912394), ERBB2 @ 67 (3.830356053), FANCC @ 83 (3.776114382)	HLA-C	913	2.82296	MAPRE1 @ 6 (4.289142824), STAT1 @ 72 (3.759329862), CLTC @ 98 (3.665966184)
GAB2	897	2.83147	INSR @ 10 (4.567054143), EGFR @ 18 (4.255273461), GRB2 @ 21 (4.184991908), YWHAE @ 31 (4.000171791), PIK3CA @ 49 (3.87790566), PIK3R2 @ 57 (3.849769814), ERBB2 @ 67 (3.830356053), SRC @ 72 (3.815262485), PLCG1 @ 73 (3.813392608), YWHAB @ 75 (3.807771122), PIK3CD @ 76 (3.806903236), PIK3CB @ 79 (3.788819698), PIK3R3 @ 88 (3.750814494), SHC1 @ 89 (3.749321692), PLCG2 @ 98 (3.731445794)	RELB	922	2.81771	KPNA2 @ 16 (4.098579501), CDK1 @ 18 (4.078436677), NFKB1 @ 24 (4.021122149), SMARCA4 @ 27 (4.004652833), HDAC1 @ 45 (3.875037284), EZH2 @ 49 (3.859099803), RELA @ 55 (3.832644555), TRAF6 @ 60 (3.802540496), SIRT1 @ 61 (3.802094612), STAT1 @ 72 (3.759329862), CLTC @ 98 (3.665966184)
YES1	912	2.82357	YAP1 @ 8 (4.590383402), EGFR @ 18 (4.255273461), GRB2 @ 21 (4.184991908), CDH1 @ 26 (4.048973937), NRAS @ 41 (3.934319021), CTNNB1 @ 42 (3.926547961), KRAS @ 43 (3.922588159), HSP90AB1 @ 47 (3.89559168), HRAS @ 55 (3.85675947), NPM1 @ 70 (3.818434018), SRC @ 72 (3.815262485), ERBB4 @ 84 (3.769879596), PIK3R3 @ 88 (3.750814494), SHC1 @ 89 (3.749321692), PLCG2 @ 98 (3.731445794)	SELL	937	2.81048	GRB2 @ 65 (3.770730971)
RAB3A	930	2.8182	EGFR @ 18 (4.255273461), MADD @ 74 (3.812266803), APP @ 91 (3.745785722)	CALML5	956	2.80139	TP53 @ 7 (4.263878027), SRC @ 32 (3.98269232), PRKACA @ 69 (3.762362936), HSP90AB1 @ 77 (3.725182879), AKT1 @ 82 (3.716718023), HSP90AA1 @ 87 (3.706481498), CDK2 @ 89 (3.699623682), ESR1 @ 95 (3.677494751)
RAF1	961	2.80683	INSR @ 10 (4.567054143), EGFR @ 18 (4.255273461), GRB2 @ 21 (4.184991908), YWHAE @ 31 (4.000171791), NRAS @ 41 (3.934319021), KRAS @ 43 (3.922588159), HSP90AB1 @ 47 (3.89559168), PIK3CA @ 49 (3.87790566), HRAS @ 55 (3.85675947), PIK3R2 @ 57 (3.849769814), SRC @ 72 (3.815262485), YWHAB @ 75 (3.807771122), PIK3CD @ 76 (3.806903236), PIK3CB @ 79 (3.788819698), PIK3R3 @ 88 (3.750814494), STAT3 @ 92 (…	ILF2	961	2.79765	EP300 @ 3 (4.566455535), RPS26 @ 4 (4.467848456), EGFR @ 8 (4.259252678), ELAVL1 @ 12 (4.178507033), RAD50 @ 19 (4.067545896), H2AX @ 33 (3.978872976), YWHAE @ 37 (3.946570154), CDK9 @ 40 (3.936164117), JUN @ 42 (3.928420791), EZH2 @ 49 (3.859099803), RELA @ 55 (3.832644555), XRCC6 @ 80 (3.718531754), CDK2 @ 89 (3.699623682), ESR1 @ 95 (3.677494751)
TRAF2	968	2.8042	EGFR @ 18 (4.255273461), CYB5R2 @ 37 (3.950721474), EP300 @ 44 (3.908165976), HSP90AB1 @ 47 (3.89559168), PIK3CA @ 49 (3.87790566), PIK3R2 @ 57 (3.849769814), UBA52 @ 58 (3.849143067), RPS27A @ 64 (3.841632945), CLTC @ 68 (3.829350917), PIK3CD @ 76 (3.806903236), PIK3CB @ 79 (3.788819698), FHL2 @ 82 (3.784994951), PIK3R3 @ 88 (3.750814494)	SPTAN1	970	2.79103	MAPRE1 @ 6 (4.289142824), APP @ 20 (4.06357256), NRF1 @ 22 (4.046253517), NFKB1 @ 24 (4.021122149), SRC @ 32 (3.98269232), JUN @ 42 (3.928420791), GRB2 @ 65 (3.770730971), STAT1 @ 72 (3.759329862), HSP90AB1 @ 77 (3.725182879), HSP90AA1 @ 87 (3.706481498), CDK2 @ 89 (3.699623682), YWHAB @ 93 (3.686814642), ESR1 @ 95 (3.677494751)
XRCC5	977	2.79961	CDK2 @ 3 (4.692024128), CDH1 @ 26 (4.048973937), EP300 @ 44 (3.908165976), TERF2 @ 48 (3.885006348), TERF1 @ 65 (3.835912394)	C3	975	2.78925	APP @ 20 (4.06357256)
DDX3X	988	2.79457	CDK2 @ 3 (4.692024128), TP53 @ 29 (4.011818792), CDK1 @ 36 (3.960479767), CTNNB1 @ 42 (3.926547961), TERF2 @ 48 (3.885006348), PIK3R2 @ 57 (3.849769814), NPM1 @ 70 (3.818434018)	HSPA1A	978	2.78863	TP53 @ 7 (4.263878027), EGFR @ 8 (4.259252678), ELAVL1 @ 12 (4.178507033), CTNNB1 @ 23 (4.032609254), NFKB1 @ 24 (4.021122149), H2AX @ 33 (3.978872976), FOXP3 @ 34 (3.966832631), RPS27A @ 35 (3.95946954), YWHAE @ 37 (3.946570154), IRF1 @ 39 (3.937384347), CDK9 @ 40 (3.936164117), EZH2 @ 49 (3.859099803), SOX9 @ 50 (3.856009024), RELA @ 55 (3.832644555), MYC @ 56 (3.825986802), AR @ 64 (3.78683704…
SOCS1	993	2.79344	INSR @ 10 (4.567054143), EGFR @ 18 (4.255273461), GRB2 @ 21 (4.184991908), IGF1R @ 23 (4.061111546), TP53 @ 29 (4.011818792), PIK3R2 @ 57 (3.849769814), ERBB2 @ 67 (3.830356053), PIK3R3 @ 88 (3.750814494), STAT3 @ 92 (3.744179493)	ATF2	983	2.78649	EP300 @ 3 (4.566455535), TP53 @ 7 (4.263878027), APP @ 20 (4.06357256), CTNNB1 @ 23 (4.032609254), H2AX @ 33 (3.978872976), JUN @ 42 (3.928420791), EZH2 @ 49 (3.859099803), ATM @ 59 (3.803938404), AR @ 64 (3.786837043), NBN @ 68 (3.766088409), PRKACA @ 69 (3.762362936), HSP90AB1 @ 77 (3.725182879), AKT1 @ 82 (3.716718023), HSP90AA1 @ 87 (3.706481498), CDK2 @ 89 (3.699623682), RAB7A @ 91 (3.694059…
LCN2	998	2.79092	POMC @ 56 (3.852283734), APP @ 91 (3.745785722), STAT3 @ 92 (3.744179493)	RAC1	993	2.78028	KPNA2 @ 16 (4.098579501), NRF1 @ 22 (4.046253517), CTNNB1 @ 23 (4.032609254), HDAC2 @ 31 (3.989763953), SRC @ 32 (3.98269232), JUN @ 42 (3.928420791), RAB35 @ 44 (3.880783612), TRAF6 @ 60 (3.802540496), STAT1 @ 72 (3.759329862), STAT3 @ 75 (3.739433125), AKT1 @ 82 (3.716718023), CDK2 @ 89 (3.699623682), CLTC @ 98 (3.665966184)
LCK	1020	2.78495	EGFR @ 18 (4.255273461), GRB2 @ 21 (4.184991908), IKZF1 @ 28 (4.018602888), FOXP3 @ 40 (3.94032475), NRAS @ 41 (3.934319021), KRAS @ 43 (3.922588159), MUC1 @ 46 (3.897446897), HSP90AB1 @ 47 (3.89559168), PIK3CA @ 49 (3.87790566), PIK3R2 @ 57 (3.849769814), SRC @ 72 (3.815262485), PLCG1 @ 73 (3.813392608), SHC1 @ 89 (3.749321692), STAT3 @ 92 (3.744179493), PLCG2 @ 98 (3.731445794)	PRKCD	1010	2.77352	EP300 @ 3 (4.566455535), TP53 @ 7 (4.263878027), EGFR @ 8 (4.259252678), ELAVL1 @ 12 (4.178507033), APP @ 20 (4.06357256), CTNNB1 @ 23 (4.032609254), SRC @ 32 (3.98269232), CDK9 @ 40 (3.936164117), STAT1 @ 72 (3.759329862), STAT3 @ 75 (3.739433125), HSP90AB1 @ 77 (3.725182879), NPM1 @ 79 (3.723229211), AKT1 @ 82 (3.716718023), HSP90AA1 @ 87 (3.706481498), YWHAB @ 93 (3.686814642)
ATF2	1023	2.78313	CDK2 @ 3 (4.692024128), TP53 @ 29 (4.011818792), CTNNB1 @ 42 (3.926547961), EP300 @ 44 (3.908165976), HSP90AB1 @ 47 (3.89559168), YWHAB @ 75 (3.807771122), CYCS @ 81 (3.787614979), APP @ 91 (3.745785722), SQOR @ 93 (3.74216698)	CAPZA1	1026	2.76418	MAPRE1 @ 6 (4.289142824), ELAVL1 @ 12 (4.178507033), JUN @ 42 (3.928420791), TRAF6 @ 60 (3.802540496), TP53BP1 @ 78 (3.725074195), YWHAB @ 93 (3.686814642)
PTPRC	1027	2.78268	INSR @ 10 (4.567054143), EGFR @ 18 (4.255273461), GRB2 @ 21 (4.184991908), IKZF1 @ 28 (4.018602888), FOXP3 @ 40 (3.94032475), CTNNB1 @ 42 (3.926547961), ERBB2 @ 67 (3.830356053)	STAT6	1029	2.762	EP300 @ 3 (4.566455535), TP53 @ 7 (4.263878027), NFKB1 @ 24 (4.021122149), SRC @ 32 (3.98269232), IRF1 @ 39 (3.937384347), HDAC1 @ 45 (3.875037284), RELA @ 55 (3.832644555), MYC @ 56 (3.825986802), STAT1 @ 72 (3.759329862), STAT3 @ 75 (3.739433125), AKT1 @ 82 (3.716718023)
RAC2	1033	2.78146	PIK3CA @ 49 (3.87790566), PIK3R2 @ 57 (3.849769814), SRC @ 72 (3.815262485), PIK3CD @ 76 (3.806903236), PIK3CB @ 79 (3.788819698), GNB1 @ 80 (3.788808915), PIK3R3 @ 88 (3.750814494), PLCG2 @ 98 (3.731445794)	ELANE	1042	2.75548	H3C13 @ 28 (3.995298939), H3C12 @ 30 (3.990523587), H3-3B @ 54 (3.833825465), H3-4 @ 88 (3.699941274)
TLR4	1034	2.78088	EGFR @ 18 (4.255273461), HSP90AB1 @ 47 (3.89559168), PIK3CA @ 49 (3.87790566), DCN @ 53 (3.863807295), PIK3R2 @ 57 (3.849769814), SRC @ 72 (3.815262485), PIK3CD @ 76 (3.806903236), PIK3CB @ 79 (3.788819698), PIK3R3 @ 88 (3.750814494), STAT3 @ 92 (3.744179493), INS @ 94 (3.741981928)	ITCH	1051	2.74741	TP53 @ 7 (4.263878027), EGFR @ 8 (4.259252678), ELAVL1 @ 12 (4.178507033), YAP1 @ 15 (4.103703234), ERBB4 @ 29 (3.99164713), SRC @ 32 (3.98269232), RPS27A @ 35 (3.95946954), UBA52 @ 41 (3.930125003), JUN @ 42 (3.928420791), MDM2 @ 47 (3.863162591), TRAF6 @ 60 (3.802540496), POU5F1 @ 90 (3.694597021)
VTN	1037	2.78059	POMC @ 56 (3.852283734), APP @ 91 (3.745785722)	RIGI	1069	2.74067	ELAVL1 @ 12 (4.178507033), NFKB1 @ 24 (4.021122149), SRC @ 32 (3.98269232), RPS27A @ 35 (3.95946954), IRF1 @ 39 (3.937384347), UBA52 @ 41 (3.930125003), RELA @ 55 (3.832644555), TRAF6 @ 60 (3.802540496), STAT1 @ 72 (3.759329862)
WAS	1063	2.77183	EGFR @ 18 (4.255273461), KPNA2 @ 20 (4.185288434), GRB2 @ 21 (4.184991908), SRC @ 72 (3.815262485), PLCG1 @ 73 (3.813392608), PLCG2 @ 98 (3.731445794)	IRF7	1081	2.73407	EP300 @ 3 (4.566455535), NFKB1 @ 24 (4.021122149), JUN @ 42 (3.928420791), RELA @ 55 (3.832644555), TRAF6 @ 60 (3.802540496), STAT1 @ 72 (3.759329862)
HP	1097	2.7572	CDK2 @ 3 (4.692024128), GRB2 @ 21 (4.184991908), GRK2 @ 45 (3.906377942)	BIRC3	1086	2.73084	EGFR @ 8 (4.259252678), NFKB1 @ 24 (4.021122149), RPS27A @ 35 (3.95946954), IRF1 @ 39 (3.937384347), RELA @ 55 (3.832644555), TRAF6 @ 60 (3.802540496)
HLA-B	1107	2.7525	RPS26 @ 4 (4.685311238), NPM1 @ 70 (3.818434018), SRC @ 72 (3.815262485), CYCS @ 81 (3.787614979)	IKBKB	1088	2.72822	TP53 @ 7 (4.263878027), CTNNB1 @ 23 (4.032609254), NFKB1 @ 24 (4.021122149), SRC @ 32 (3.98269232), JUN @ 42 (3.928420791), RELA @ 55 (3.832644555), MYC @ 56 (3.825986802), TRAF6 @ 60 (3.802540496), STAT3 @ 75 (3.739433125), HSP90AB1 @ 77 (3.725182879), AKT1 @ 82 (3.716718023), KEAP1 @ 83 (3.711971154), HSP90AA1 @ 87 (3.706481498), YWHAB @ 93 (3.686814642), CLTC @ 98 (3.665966184)
RELB	1108	2.75085	KPNA2 @ 20 (4.185288434), SIN3A @ 33 (3.966211795), CDK1 @ 36 (3.960479767), CLTC @ 68 (3.829350917)	SOCS1	1089	2.7282	TP53 @ 7 (4.263878027), EGFR @ 8 (4.259252678), NRF1 @ 22 (4.046253517), ERBB2 @ 53 (3.843354357), RELA @ 55 (3.832644555), ATM @ 59 (3.803938404), TRAF6 @ 60 (3.802540496), GRB2 @ 65 (3.770730971), STAT1 @ 72 (3.759329862), STAT3 @ 75 (3.739433125)
NLRP1	1109	2.75085	PTCH1 @ 24 (4.060915524)	AIM2	1098	2.72125	XRCC1 @ 9 (4.232647006), LIG3 @ 13 (4.116238444), RAD50 @ 19 (4.067545896), HDAC2 @ 31 (3.989763953), JUN @ 42 (3.928420791), HDAC1 @ 45 (3.875037284), NBN @ 68 (3.766088409), TP53BP1 @ 78 (3.725074195), XRCC6 @ 80 (3.718531754)
VCP	1117	2.74859	CDK2 @ 3 (4.692024128), GRB2 @ 21 (4.184991908), TP53 @ 29 (4.011818792), YWHAE @ 31 (4.000171791), CDK1 @ 36 (3.960479767), HSP90AB1 @ 47 (3.89559168), TERF2 @ 48 (3.885006348), PIK3R2 @ 57 (3.849769814), UBA52 @ 58 (3.849143067), RPS27A @ 64 (3.841632945), NPM1 @ 70 (3.818434018), SRC @ 72 (3.815262485), YWHAB @ 75 (3.807771122), PIK3R3 @ 88 (3.750814494)	BCL2L1	1109	2.7134	TP53 @ 7 (4.263878027), CDK1 @ 18 (4.078436677), CTNNB1 @ 23 (4.032609254), MDM2 @ 47 (3.863162591), RELA @ 55 (3.832644555), STAT3 @ 75 (3.739433125), AKT1 @ 82 (3.716718023), KEAP1 @ 83 (3.711971154)
MRE11	1121	2.7471	CDK2 @ 3 (4.692024128), TP53 @ 29 (4.011818792), EP300 @ 44 (3.908165976), TERF2 @ 48 (3.885006348)	RAP1A	1113	2.71122	ELAVL1 @ 12 (4.178507033), SMARCA4 @ 27 (4.004652833), SRC @ 32 (3.98269232), HDAC1 @ 45 (3.875037284), FEN1 @ 57 (3.81699797), TRAF6 @ 60 (3.802540496), SIRT1 @ 61 (3.802094612), PRKACA @ 69 (3.762362936)
RAP1B	1126	2.74471	TP53 @ 29 (4.011818792), PIK3CA @ 49 (3.87790566), HRAS @ 55 (3.85675947), PIK3R2 @ 57 (3.849769814), SRC @ 72 (3.815262485), PIK3CD @ 76 (3.806903236), PIK3CB @ 79 (3.788819698), PIK3R3 @ 88 (3.750814494), APP @ 91 (3.745785722)	CYBB	1126	2.70452	SRC @ 32 (3.98269232), AKT1 @ 82 (3.716718023)
PRKDC	1136	2.74203	CDK2 @ 3 (4.692024128), EGFR @ 18 (4.255273461), GRB2 @ 21 (4.184991908), TP53 @ 29 (4.011818792), EP300 @ 44 (3.908165976), HSP90AB1 @ 47 (3.89559168), TERF1 @ 65 (3.835912394), YWHAB @ 75 (3.807771122), SHC1 @ 89 (3.749321692)	IFNA1	1132	2.70176	EGFR @ 8 (4.259252678), NFKB1 @ 24 (4.021122149), IRF1 @ 39 (3.937384347), RELA @ 55 (3.832644555), STAT1 @ 72 (3.759329862)
PRKCE	1141	2.7395	INSR @ 10 (4.567054143), EGFR @ 18 (4.255273461), NRAS @ 41 (3.934319021), KRAS @ 43 (3.922588159), HSP90AB1 @ 47 (3.89559168), HRAS @ 55 (3.85675947), SRC @ 72 (3.815262485), PLCG1 @ 73 (3.813392608), PIK3CB @ 79 (3.788819698), GNB1 @ 80 (3.788808915), GNG2 @ 86 (3.766846214), STAT3 @ 92 (3.744179493)	IFNB1	1134	2.7009	EGFR @ 8 (4.259252678), NFKB1 @ 24 (4.021122149), IRF1 @ 39 (3.937384347), RELA @ 55 (3.832644555), STAT1 @ 72 (3.759329862)
SPTAN1	1170	2.72938	CDK2 @ 3 (4.692024128), GRB2 @ 21 (4.184991908), HSP90AB1 @ 47 (3.89559168), TERF1 @ 65 (3.835912394), SRC @ 72 (3.815262485), YWHAB @ 75 (3.807771122), FANCC @ 83 (3.776114382), SHC1 @ 89 (3.749321692), APP @ 91 (3.745785722), GPHN @ 95 (3.735885107)	UBE2D2	1142	2.69845	TP53 @ 7 (4.263878027), BRCA1 @ 14 (4.109727894), CTNNB1 @ 23 (4.032609254), NFKB1 @ 24 (4.021122149), RPS27A @ 35 (3.95946954), UBA52 @ 41 (3.930125003), MDM2 @ 47 (3.863162591), RELA @ 55 (3.832644555), TRAF6 @ 60 (3.802540496)
ILF2	1184	2.72379	CDK2 @ 3 (4.692024128), RPS26 @ 4 (4.685311238), EGFR @ 18 (4.255273461), YWHAE @ 31 (4.000171791), EP300 @ 44 (3.908165976)	PIN1	1144	2.69778	EP300 @ 3 (4.566455535), TP53 @ 7 (4.263878027), ELAVL1 @ 12 (4.178507033), YAP1 @ 15 (4.103703234), CDK1 @ 18 (4.078436677), APP @ 20 (4.06357256), CTNNB1 @ 23 (4.032609254), CDK9 @ 40 (3.936164117), JUN @ 42 (3.928420791), ERBB2 @ 53 (3.843354357), RELA @ 55 (3.832644555), MYC @ 56 (3.825986802), TRAF6 @ 60 (3.802540496), PRKACA @ 69 (3.762362936), STAT3 @ 75 (3.739433125), XRCC6 @ 80 (3.718531…
PKM	1197	2.71745	CDK2 @ 3 (4.692024128), GRB2 @ 21 (4.184991908), TP53 @ 29 (4.011818792), CTNNB1 @ 42 (3.926547961), EP300 @ 44 (3.908165976), HSP90AB1 @ 47 (3.89559168), UBA52 @ 58 (3.849143067), TERF1 @ 65 (3.835912394), NPM1 @ 70 (3.818434018), APP @ 91 (3.745785722), STAT3 @ 92 (3.744179493)	PPP2R1B	1145	2.69734	EGFR @ 8 (4.259252678), YAP1 @ 15 (4.103703234), CDK1 @ 18 (4.078436677), NFKB1 @ 24 (4.021122149), HDAC1 @ 45 (3.875037284), RELA @ 55 (3.832644555), STAT3 @ 75 (3.739433125), AKT1 @ 82 (3.716718023), RAB7A @ 91 (3.694059873)
PTPN6	1198	2.71722	INSR @ 10 (4.567054143), EGFR @ 18 (4.255273461), GRB2 @ 21 (4.184991908), CTNNB1 @ 42 (3.926547961), PIK3CA @ 49 (3.87790566), PIK3R2 @ 57 (3.849769814), SRC @ 72 (3.815262485), PLCG1 @ 73 (3.813392608), PIK3CD @ 76 (3.806903236), PIK3CB @ 79 (3.788819698), PIK3R3 @ 88 (3.750814494), SHC1 @ 89 (3.749321692), STAT3 @ 92 (3.744179493)	ITGAV	1159	2.68766	SRC @ 32 (3.98269232)
PSTPIP1	1199	2.717	RPS26 @ 4 (4.685311238)	JUP	1163	2.68468	EGFR @ 8 (4.259252678), BRCA1 @ 14 (4.109727894), CTNNB1 @ 23 (4.032609254), SRC @ 32 (3.98269232), CDH1 @ 48 (3.861344958), ERBB2 @ 53 (3.843354357), XRCC6 @ 80 (3.718531754), CDK2 @ 89 (3.699623682), RAB7A @ 91 (3.694059873), ESR1 @ 95 (3.677494751)
FOS	1201	2.7169	TBP @ 13 (4.487899762), EGFR @ 18 (4.255273461), RUNX1 @ 19 (4.230547681), TP53 @ 29 (4.011818792), CTNNB1 @ 42 (3.926547961), EP300 @ 44 (3.908165976), HRAS @ 55 (3.85675947), SRC @ 72 (3.815262485), YWHAB @ 75 (3.807771122), FOXO1 @ 90 (3.74627242), APP @ 91 (3.745785722), STAT3 @ 92 (3.744179493)	MYH9	1172	2.67934	APP @ 20 (4.06357256), NFKB1 @ 24 (4.021122149), SRC @ 32 (3.98269232), JUN @ 42 (3.928420791), GRB2 @ 65 (3.770730971), HSP90AB1 @ 77 (3.725182879), HSP90AA1 @ 87 (3.706481498), CDK2 @ 89 (3.699623682), ESR1 @ 95 (3.677494751)
CLU	1203	2.71631	GRB2 @ 21 (4.184991908), ADCYAP1 @ 32 (3.997515734), APP @ 91 (3.745785722)	HLA-E	1174	2.6788	STAT1 @ 72 (3.759329862)
ACLY	1205	2.71528	KPNA2 @ 20 (4.185288434), TERF2 @ 48 (3.885006348), TERF1 @ 65 (3.835912394), SHC1 @ 89 (3.749321692), APP @ 91 (3.745785722)	PTPN6	1184	2.67147	EGFR @ 8 (4.259252678), CTNNB1 @ 23 (4.032609254), SRC @ 32 (3.98269232), IRF1 @ 39 (3.937384347), TRAF6 @ 60 (3.802540496), GRB2 @ 65 (3.770730971), STAT3 @ 75 (3.739433125), ESR1 @ 95 (3.677494751)
JUP	1224	2.70787	CDK2 @ 3 (4.692024128), EGFR @ 18 (4.255273461), CDH1 @ 26 (4.048973937), CTNNB1 @ 42 (3.926547961), MUC1 @ 46 (3.897446897), ERBB2 @ 67 (3.830356053), SRC @ 72 (3.815262485), FHL2 @ 82 (3.784994951), LEF1 @ 87 (3.764766052)	GSDMD	1201	2.66509	IRF1 @ 39 (3.937384347)
PPP2R1B	1229	2.70644	YAP1 @ 8 (4.590383402), EGFR @ 18 (4.255273461), CDK1 @ 36 (3.960479767), STAT3 @ 92 (3.744179493)	CEP290	1204	2.66379	MAPRE1 @ 6 (4.289142824), ESR1 @ 95 (3.677494751)
TXNIP	1230	2.70362	KPNA2 @ 20 (4.185288434), TP53 @ 29 (4.011818792), HSP90AB1 @ 47 (3.89559168)	VAV1	1206	2.66213	ERBB3 @ 2 (4.731127927), EGFR @ 8 (4.259252678), SRC @ 32 (3.98269232), EZH2 @ 49 (3.859099803), ERBB2 @ 53 (3.843354357), AR @ 64 (3.786837043), GRB2 @ 65 (3.770730971), XRCC6 @ 80 (3.718531754)
NFKBIB	1241	2.70111	TBP @ 13 (4.487899762), KPNA2 @ 20 (4.185288434), HSP90AB1 @ 47 (3.89559168), CLTC @ 68 (3.829350917), APP @ 91 (3.745785722)	PKM	1208	2.6608	EP300 @ 3 (4.566455535), TP53 @ 7 (4.263878027), APP @ 20 (4.06357256), CTNNB1 @ 23 (4.032609254), NFKB1 @ 24 (4.021122149), H2AX @ 33 (3.978872976), UBA52 @ 41 (3.930125003), JUN @ 42 (3.928420791), MDM2 @ 47 (3.863162591), EZH2 @ 49 (3.859099803), RELA @ 55 (3.832644555), MYC @ 56 (3.825986802), GRB2 @ 65 (3.770730971), PRKACA @ 69 (3.762362936), STAT3 @ 75 (3.739433125), HSP90AB1 @ 77 (3.72518…
ITGB2	1254	2.69677	EGFR @ 18 (4.255273461), PIK3CA @ 49 (3.87790566), PIK3R2 @ 57 (3.849769814), SRC @ 72 (3.815262485), YWHAB @ 75 (3.807771122), PIK3CD @ 76 (3.806903236), PIK3CB @ 79 (3.788819698), FHL2 @ 82 (3.784994951), PIK3R3 @ 88 (3.750814494)	RAC2	1241	2.64677	NFKB1 @ 24 (4.021122149), SRC @ 32 (3.98269232), RELA @ 55 (3.832644555), AKT1 @ 82 (3.716718023)
CD44	1275	2.68514	EGFR @ 18 (4.255273461), TP53 @ 29 (4.011818792), EP300 @ 44 (3.908165976), ERBB2 @ 67 (3.830356053), SRC @ 72 (3.815262485), ERBB4 @ 84 (3.769879596), LEF1 @ 87 (3.764766052), STAT3 @ 92 (3.744179493)	UBE2D3	1247	2.6448	TP53 @ 7 (4.263878027), ELAVL1 @ 12 (4.178507033), BRCA1 @ 14 (4.109727894), NRF1 @ 22 (4.046253517), NFKB1 @ 24 (4.021122149), RPS27A @ 35 (3.95946954), UBA52 @ 41 (3.930125003), MDM2 @ 47 (3.863162591), RELA @ 55 (3.832644555), TRAF6 @ 60 (3.802540496)
PTPRJ	1278	2.6835	INSR @ 10 (4.567054143), EGFR @ 18 (4.255273461), GRB2 @ 21 (4.184991908), CTNNB1 @ 42 (3.926547961), HRAS @ 55 (3.85675947), ERBB2 @ 67 (3.830356053), SRC @ 72 (3.815262485), PLCG1 @ 73 (3.813392608), FANCC @ 83 (3.776114382)	SOS1	1250	2.64239	ERBB3 @ 2 (4.731127927), EGFR @ 8 (4.259252678), NRF1 @ 22 (4.046253517), SRC @ 32 (3.98269232), ERBB2 @ 53 (3.843354357), GRB2 @ 65 (3.770730971), AKT1 @ 82 (3.716718023), ESR1 @ 95 (3.677494751)
MAPK9	1304	2.66941	EGFR @ 18 (4.255273461), GRB2 @ 21 (4.184991908), TP53 @ 29 (4.011818792), CTBP1 @ 34 (3.965358784), NRAS @ 41 (3.934319021), CTNNB1 @ 42 (3.926547961), KRAS @ 43 (3.922588159), HRAS @ 55 (3.85675947), SRC @ 72 (3.815262485), FOXO1 @ 90 (3.74627242), APP @ 91 (3.745785722), STAT3 @ 92 (3.744179493)	CFP	1260	2.63725	ELAVL1 @ 12 (4.178507033)
AHCYL1	1310	2.66646	YAP1 @ 8 (4.590383402), SIN3A @ 33 (3.966211795), UBA52 @ 58 (3.849143067)	RAF1	1264	2.6361	EGFR @ 8 (4.259252678), NRF1 @ 22 (4.046253517), NFKB1 @ 24 (4.021122149), SRC @ 32 (3.98269232), YWHAE @ 37 (3.946570154), RELA @ 55 (3.832644555), MYC @ 56 (3.825986802), AR @ 64 (3.786837043), GRB2 @ 65 (3.770730971), PRKACA @ 69 (3.762362936), STAT3 @ 75 (3.739433125), HSP90AB1 @ 77 (3.725182879), AKT1 @ 82 (3.716718023), HSP90AA1 @ 87 (3.706481498), YWHAB @ 93 (3.686814642)
DYNLL1	1314	2.66422	GRB2 @ 21 (4.184991908), CDK1 @ 36 (3.960479767), GPHN @ 95 (3.735885107)	PAK1	1273	2.63259	EGFR @ 8 (4.259252678), APP @ 20 (4.06357256), CTNNB1 @ 23 (4.032609254), HDAC2 @ 31 (3.989763953), H2AX @ 33 (3.978872976), YWHAE @ 37 (3.946570154), ERBB2 @ 53 (3.843354357), GRB2 @ 65 (3.770730971), PRKACA @ 69 (3.762362936), BMPR1B @ 76 (3.725317326), AKT1 @ 82 (3.716718023), HSP90AA1 @ 87 (3.706481498), ESR1 @ 95 (3.677494751)
NF2	1319	2.66136	YAP1 @ 8 (4.590383402), EGFR @ 18 (4.255273461), CDH1 @ 26 (4.048973937), TP53 @ 29 (4.011818792), CTNNB1 @ 42 (3.926547961), ERBB2 @ 67 (3.830356053)	CSNK2B	1285	2.62705	TP53 @ 7 (4.263878027), BRCA1 @ 14 (4.109727894), CDK1 @ 18 (4.078436677), NRF1 @ 22 (4.046253517), CTNNB1 @ 23 (4.032609254), CDK9 @ 40 (3.936164117), JUN @ 42 (3.928420791), HDAC1 @ 45 (3.875037284), EZH2 @ 49 (3.859099803), SIRT1 @ 61 (3.802094612), NPM1 @ 79 (3.723229211), RAD51 @ 85 (3.708628165), CDK2 @ 89 (3.699623682), ESR1 @ 95 (3.677494751)
MAP2K1	1336	2.65067	YAP1 @ 8 (4.590383402), EGFR @ 18 (4.255273461), CDH1 @ 26 (4.048973937), YWHAE @ 31 (4.000171791), CDK1 @ 36 (3.960479767), NRAS @ 41 (3.934319021), KRAS @ 43 (3.922588159), EP300 @ 44 (3.908165976), HSP90AB1 @ 47 (3.89559168), PIK3CA @ 49 (3.87790566), HRAS @ 55 (3.85675947), ERBB2 @ 67 (3.830356053), SRC @ 72 (3.815262485), YWHAB @ 75 (3.807771122)	IFNA4	1287	2.62506	EGFR @ 8 (4.259252678), NFKB1 @ 24 (4.021122149), IRF1 @ 39 (3.937384347), STAT1 @ 72 (3.759329862)
AIM2	1340	2.65034	IKZF5 @ 39 (3.94821257)	IFNA2	1288	2.62497	EGFR @ 8 (4.259252678), NFKB1 @ 24 (4.021122149), IRF1 @ 39 (3.937384347), RELA @ 55 (3.832644555), STAT1 @ 72 (3.759329862)
CASP8	1342	2.64983	CDH1 @ 26 (4.048973937), TP53 @ 29 (4.011818792), CDK1 @ 36 (3.960479767), CTNNB1 @ 42 (3.926547961), HSP90AB1 @ 47 (3.89559168), SRC @ 72 (3.815262485), APP @ 91 (3.745785722)	IFNA17	1300	2.62217	EGFR @ 8 (4.259252678), NFKB1 @ 24 (4.021122149), IRF1 @ 39 (3.937384347), RELA @ 55 (3.832644555), STAT1 @ 72 (3.759329862)
CD19	1345	2.64836	GRB2 @ 21 (4.184991908), PIK3CA @ 49 (3.87790566), PIK3R2 @ 57 (3.849769814), PIK3CD @ 76 (3.806903236), PIK3CB @ 79 (3.788819698), PIK3R3 @ 88 (3.750814494), PLCG2 @ 98 (3.731445794)	TXNIP	1310	2.61728	TP53 @ 7 (4.263878027), ELAVL1 @ 12 (4.178507033), KPNA2 @ 16 (4.098579501), ZBTB16 @ 38 (3.943619187), HDAC1 @ 45 (3.875037284), HSP90AB1 @ 77 (3.725182879)
PSMA1	1348	2.6467	IKZF3 @ 16 (4.29678545), IKZF1 @ 28 (4.018602888), UBA52 @ 58 (3.849143067), RPS27A @ 64 (3.841632945), APP @ 91 (3.745785722)	APOB	1311	2.61695	EGFR @ 8 (4.259252678), APP @ 20 (4.06357256), HSP90AA1 @ 87 (3.706481498)
DSP	1352	2.64506	CDK2 @ 3 (4.692024128), CDH1 @ 26 (4.048973937), CTNNB1 @ 42 (3.926547961), RAB5B @ 78 (3.79689129)	PSMA1	1321	2.61341	MAPRE1 @ 6 (4.289142824), APP @ 20 (4.06357256), NFKB1 @ 24 (4.021122149), RPS27A @ 35 (3.95946954), UBA52 @ 41 (3.930125003), MYC @ 56 (3.825986802), TRAF6 @ 60 (3.802540496)
GSDMD	1356	2.6433	CYCS @ 81 (3.787614979)	MAP3K7	1324	2.61265	NFKB1 @ 24 (4.021122149), RPS27A @ 35 (3.95946954), YWHAE @ 37 (3.946570154), JUN @ 42 (3.928420791), EZH2 @ 49 (3.859099803), RELA @ 55 (3.832644555), MYC @ 56 (3.825986802), ATM @ 59 (3.803938404), TRAF6 @ 60 (3.802540496), PRKACA @ 69 (3.762362936), STAT3 @ 75 (3.739433125), HSP90AB1 @ 77 (3.725182879), HSP90AA1 @ 87 (3.706481498), CLTC @ 98 (3.665966184)
MUC5AC	1379	2.6333	MUC1 @ 46 (3.897446897), MUC4 @ 97 (3.732637271)	IFNA14	1327	2.6103	EGFR @ 8 (4.259252678), NFKB1 @ 24 (4.021122149), IRF1 @ 39 (3.937384347), STAT1 @ 72 (3.759329862)
MUC5B	1390	2.62436	MUC1 @ 46 (3.897446897), MUC4 @ 97 (3.732637271)	IFNA10	1330	2.60995	EGFR @ 8 (4.259252678), NFKB1 @ 24 (4.021122149), IRF1 @ 39 (3.937384347), STAT1 @ 72 (3.759329862)
ACTG1	1405	2.61417	CDK2 @ 3 (4.692024128), GRB2 @ 21 (4.184991908), CDH1 @ 26 (4.048973937), HSP90AB1 @ 47 (3.89559168)	IFNA21	1331	2.60979	EGFR @ 8 (4.259252678), NFKB1 @ 24 (4.021122149), IRF1 @ 39 (3.937384347), STAT1 @ 72 (3.759329862)
MUC6	1413	2.61164	MUC1 @ 46 (3.897446897), MUC4 @ 97 (3.732637271)	CD81	1333	2.60899	EGFR @ 8 (4.259252678), ZBTB16 @ 38 (3.943619187), TRAF6 @ 60 (3.802540496), NPM1 @ 79 (3.723229211), XRCC6 @ 80 (3.718531754), AKT1 @ 82 (3.716718023), H3-4 @ 88 (3.699941274)
SRP14	1416	2.609	RPS26 @ 4 (4.685311238), GRB2 @ 21 (4.184991908), UBA52 @ 58 (3.849143067), RPS27A @ 64 (3.841632945)	IFNA5	1334	2.60825	EGFR @ 8 (4.259252678), APP @ 20 (4.06357256), NFKB1 @ 24 (4.021122149), IRF1 @ 39 (3.937384347), STAT1 @ 72 (3.759329862)
IKBKB	1440	2.59286	TP53 @ 29 (4.011818792), CTNNB1 @ 42 (3.926547961), MUC1 @ 46 (3.897446897), HSP90AB1 @ 47 (3.89559168), CLTC @ 68 (3.829350917), SRC @ 72 (3.815262485), YWHAB @ 75 (3.807771122), FOXO1 @ 90 (3.74627242), STAT3 @ 92 (3.744179493), INS @ 94 (3.741981928)	CD47	1335	2.60743	ELAVL1 @ 12 (4.178507033), NRF1 @ 22 (4.046253517)
CSNK2B	1441	2.59261	CDK2 @ 3 (4.692024128), TP53 @ 29 (4.011818792), CDK1 @ 36 (3.960479767), CTNNB1 @ 42 (3.926547961), GRK2 @ 45 (3.906377942), TERF2 @ 48 (3.885006348), TERF1 @ 65 (3.835912394), NPM1 @ 70 (3.818434018)	MAPK13	1338	2.60577	TP53 @ 7 (4.263878027), APP @ 20 (4.06357256), SRC @ 32 (3.98269232), JUN @ 42 (3.928420791), PRKACA @ 69 (3.762362936), XRCC6 @ 80 (3.718531754), AKT1 @ 82 (3.716718023), MED1 @ 84 (3.711224374), YWHAB @ 93 (3.686814642), ESR1 @ 95 (3.677494751), CLTC @ 98 (3.665966184)
MAPK13	1457	2.58482	TP53 @ 29 (4.011818792), CLTC @ 68 (3.829350917), SRC @ 72 (3.815262485), YWHAB @ 75 (3.807771122), GNB1 @ 80 (3.788808915), FOXO1 @ 90 (3.74627242), APP @ 91 (3.745785722)	IFNA7	1347	2.59568	EGFR @ 8 (4.259252678), NFKB1 @ 24 (4.021122149), IRF1 @ 39 (3.937384347), STAT1 @ 72 (3.759329862)
TUBB4B	1460	2.58444	CDK2 @ 3 (4.692024128), EGFR @ 18 (4.255273461), GRB2 @ 21 (4.184991908), YWHAE @ 31 (4.000171791), GRK2 @ 45 (3.906377942), TERF1 @ 65 (3.835912394), YWHAB @ 75 (3.807771122), SHC1 @ 89 (3.749321692)	PRTN3	1368	2.58812	RELA @ 55 (3.832644555)
ITGAM	1462	2.58338	PIK3CA @ 49 (3.87790566), PIK3R2 @ 57 (3.849769814), SRC @ 72 (3.815262485), PIK3CD @ 76 (3.806903236), PIK3CB @ 79 (3.788819698), PIK3R3 @ 88 (3.750814494), STAT3 @ 92 (3.744179493)	POLR3B	1402	2.57385	NRF1 @ 22 (4.046253517), MED1 @ 84 (3.711224374)
UBE2D1	1465	2.58196	YAP1 @ 8 (4.590383402), TP53 @ 29 (4.011818792), CTNNB1 @ 42 (3.926547961), EP300 @ 44 (3.908165976), UBA52 @ 58 (3.849143067), RPS27A @ 64 (3.841632945)	NCSTN	1410	2.57169	ELAVL1 @ 12 (4.178507033), RAD50 @ 19 (4.067545896), APP @ 20 (4.06357256), CDH1 @ 48 (3.861344958)
DNM2	1476	2.57169	CDK2 @ 3 (4.692024128), GRB2 @ 21 (4.184991908), CDK1 @ 36 (3.960479767), ERBB2 @ 67 (3.830356053), CLTC @ 68 (3.829350917), SRC @ 72 (3.815262485), SHC1 @ 89 (3.749321692), APP @ 91 (3.745785722)	IFNA16	1411	2.57155	EGFR @ 8 (4.259252678), APP @ 20 (4.06357256), NFKB1 @ 24 (4.021122149), IRF1 @ 39 (3.937384347), STAT1 @ 72 (3.759329862)
CHUK	1478	2.57025	TP53 @ 29 (4.011818792), CTNNB1 @ 42 (3.926547961), EP300 @ 44 (3.908165976), HSP90AB1 @ 47 (3.89559168), CLTC @ 68 (3.829350917), SRC @ 72 (3.815262485), FOXO1 @ 90 (3.74627242)	SDCBP	1412	2.57138	EGFR @ 8 (4.259252678), ELAVL1 @ 12 (4.178507033), NRF1 @ 22 (4.046253517), CTNNB1 @ 23 (4.032609254), SRC @ 32 (3.98269232), EZH2 @ 49 (3.859099803), TRAF6 @ 60 (3.802540496)
ITGAV	1490	2.5652	IGF1R @ 23 (4.061111546), SRC @ 72 (3.815262485)	VAPA	1418	2.5692	EGFR @ 8 (4.259252678), APP @ 20 (4.06357256), NRF1 @ 22 (4.046253517), NFKB1 @ 24 (4.021122149), SMARCA4 @ 27 (4.004652833), JUN @ 42 (3.928420791), ERBB2 @ 53 (3.843354357), PRKACA @ 69 (3.762362936)
GSTP1	1493	2.56429	CDK2 @ 3 (4.692024128), EGFR @ 18 (4.255273461), GRB2 @ 21 (4.184991908), FANCC @ 83 (3.776114382)	PSMD4	1419	2.56877	TP53 @ 7 (4.263878027), EGFR @ 8 (4.259252678), APP @ 20 (4.06357256), RPS27A @ 35 (3.95946954), UBA52 @ 41 (3.930125003), JUN @ 42 (3.928420791), MDM2 @ 47 (3.863162591), MYC @ 56 (3.825986802), TRAF6 @ 60 (3.802540496), NPM1 @ 79 (3.723229211), KEAP1 @ 83 (3.711971154)
DYNC1H1	1496	2.56091	CDK2 @ 3 (4.692024128), EGFR @ 18 (4.255273461), GRB2 @ 21 (4.184991908), CDK1 @ 36 (3.960479767)	PECAM1	1421	2.56838	CTNNB1 @ 23 (4.032609254), SRC @ 32 (3.98269232), XRCC6 @ 80 (3.718531754), AKT1 @ 82 (3.716718023)
GRAP2	1525	2.5473	EGFR @ 18 (4.255273461), GRB2 @ 21 (4.184991908), YWHAE @ 31 (4.000171791), ERBB2 @ 67 (3.830356053), SRC @ 72 (3.815262485), PLCG1 @ 73 (3.813392608), SHC1 @ 89 (3.749321692), PLCG2 @ 98 (3.731445794)	NF2	1422	2.5681	TP53 @ 7 (4.263878027), EGFR @ 8 (4.259252678), YAP1 @ 15 (4.103703234), NRF1 @ 22 (4.046253517), CTNNB1 @ 23 (4.032609254), CDH1 @ 48 (3.861344958), ERBB2 @ 53 (3.843354357), PRKACA @ 69 (3.762362936), AKT1 @ 82 (3.716718023)
MYH9	1542	2.53892	CDK2 @ 3 (4.692024128), GRB2 @ 21 (4.184991908), GNAS @ 27 (4.026244404), HSP90AB1 @ 47 (3.89559168), TERF2 @ 48 (3.885006348), PIK3R2 @ 57 (3.849769814), TERF1 @ 65 (3.835912394), SRC @ 72 (3.815262485), SHC1 @ 89 (3.749321692), APP @ 91 (3.745785722)	ANXA2	1435	2.55834	ERBB3 @ 2 (4.731127927), EP300 @ 3 (4.566455535), TP53 @ 7 (4.263878027), EGFR @ 8 (4.259252678), APP @ 20 (4.06357256), NFKB1 @ 24 (4.021122149), SRC @ 32 (3.98269232), H2AX @ 33 (3.978872976), CDK9 @ 40 (3.936164117), JUN @ 42 (3.928420791), ERBB2 @ 53 (3.843354357), MYC @ 56 (3.825986802), TRAF6 @ 60 (3.802540496), GRB2 @ 65 (3.770730971), NPM1 @ 79 (3.723229211), CDK2 @ 89 (3.699623682), ESR1…
S100A8	1549	2.53487	CDK2 @ 3 (4.692024128), GRB2 @ 21 (4.184991908), CDH1 @ 26 (4.048973937), TP53 @ 29 (4.011818792), TERF2 @ 48 (3.885006348), TERF1 @ 65 (3.835912394), SHC1 @ 89 (3.749321692), APP @ 91 (3.745785722)	RIPK3	1436	2.5583	NFKB1 @ 24 (4.021122149), YWHAE @ 37 (3.946570154), BMPR1B @ 76 (3.725317326), HSP90AB1 @ 77 (3.725182879), HSP90AA1 @ 87 (3.706481498), CLTC @ 98 (3.665966184)
MUC3A	1555	2.53237	MUC1 @ 46 (3.897446897), MUC4 @ 97 (3.732637271)	MAP2K1	1438	2.55811	EP300 @ 3 (4.566455535), EGFR @ 8 (4.259252678), ELAVL1 @ 12 (4.178507033), YAP1 @ 15 (4.103703234), CDK1 @ 18 (4.078436677), NFKB1 @ 24 (4.021122149), SRC @ 32 (3.98269232), YWHAE @ 37 (3.946570154), CDH1 @ 48 (3.861344958), ERBB2 @ 53 (3.843354357), MYC @ 56 (3.825986802), TRAF6 @ 60 (3.802540496), PRKACA @ 69 (3.762362936), HSP90AB1 @ 77 (3.725182879), HSP90AA1 @ 87 (3.706481498), YWHAB @ 93 (…
HMGB1	1568	2.52866	CDK2 @ 3 (4.692024128), TBP @ 13 (4.487899762), TP53 @ 29 (4.011818792), CDK1 @ 36 (3.960479767), TERF2 @ 48 (3.885006348)	VAV2	1440	2.55537	ERBB3 @ 2 (4.731127927), EGFR @ 8 (4.259252678), ELAVL1 @ 12 (4.178507033), SRC @ 32 (3.98269232), ERBB2 @ 53 (3.843354357), AR @ 64 (3.786837043), GRB2 @ 65 (3.770730971)
BTK	1569	2.52857	GRB2 @ 21 (4.184991908), IKZF1 @ 28 (4.018602888), TP53 @ 29 (4.011818792), HSP90AB1 @ 47 (3.89559168), PIK3CA @ 49 (3.87790566), PIK3R2 @ 57 (3.849769814), PLCG1 @ 73 (3.813392608), PIK3CD @ 76 (3.806903236), PIK3CB @ 79 (3.788819698), GNB1 @ 80 (3.788808915), GNG2 @ 86 (3.766846214), PIK3R3 @ 88 (3.750814494), SHC1 @ 89 (3.749321692), APP @ 91 (3.745785722), STAT3 @ 92 (3.744179493), PLCG2 @ 98…	HCK	1442	2.55344	ERBB3 @ 2 (4.731127927), EGFR @ 8 (4.259252678), APP @ 20 (4.06357256), SRC @ 32 (3.98269232), AR @ 64 (3.786837043), GRB2 @ 65 (3.770730971), STAT1 @ 72 (3.759329862), STAT3 @ 75 (3.739433125), HSP90AB1 @ 77 (3.725182879), HSP90AA1 @ 87 (3.706481498)
ITPR1	1574	2.52631	CDK1 @ 36 (3.960479767), PLCG1 @ 73 (3.813392608), CYCS @ 81 (3.787614979), PLCG2 @ 98 (3.731445794)	DNM2	1443	2.55326	CDK1 @ 18 (4.078436677), APP @ 20 (4.06357256), SRC @ 32 (3.98269232), ZBTB16 @ 38 (3.943619187), ERBB2 @ 53 (3.843354357), MYC @ 56 (3.825986802), GRB2 @ 65 (3.770730971), CDK2 @ 89 (3.699623682), RAB7A @ 91 (3.694059873), CLTC @ 98 (3.665966184)
NFATC1	1583	2.5217	TP53 @ 29 (4.011818792), FOXP3 @ 40 (3.94032475), EP300 @ 44 (3.908165976)	CASP8	1453	2.55012	TP53 @ 7 (4.263878027), CDK1 @ 18 (4.078436677), APP @ 20 (4.06357256), CTNNB1 @ 23 (4.032609254), SRC @ 32 (3.98269232), MDM2 @ 47 (3.863162591), CDH1 @ 48 (3.861344958), RELA @ 55 (3.832644555), MYC @ 56 (3.825986802), ATM @ 59 (3.803938404), TRAF6 @ 60 (3.802540496), AR @ 64 (3.786837043), SOX2 @ 70 (3.761055665), HSP90AB1 @ 77 (3.725182879), AKT1 @ 82 (3.716718023)
MAPK12	1604	2.51301	GRB2 @ 21 (4.184991908), TP53 @ 29 (4.011818792), CTNNB1 @ 42 (3.926547961), TERF1 @ 65 (3.835912394), SRC @ 72 (3.815262485), GNB1 @ 80 (3.788808915), FOXO1 @ 90 (3.74627242)	MAPK12	1460	2.54756	TP53 @ 7 (4.263878027), NRF1 @ 22 (4.046253517), CTNNB1 @ 23 (4.032609254), SRC @ 32 (3.98269232), JUN @ 42 (3.928420791), GRB2 @ 65 (3.770730971), PRKACA @ 69 (3.762362936), AKT1 @ 82 (3.716718023), MED1 @ 84 (3.711224374), ESR1 @ 95 (3.677494751)
TXN	1611	2.51071	CDK2 @ 3 (4.692024128), EGFR @ 18 (4.255273461), TP53 @ 29 (4.011818792), EP300 @ 44 (3.908165976), HSP90AB1 @ 47 (3.89559168), NPM1 @ 70 (3.818434018), CYCS @ 81 (3.787614979), INS @ 94 (3.741981928)	PPP3CA	1470	2.54324	JUN @ 42 (3.928420791), GRB2 @ 65 (3.770730971), AKT1 @ 82 (3.716718023)
VCL	1614	2.50977	CDK2 @ 3 (4.692024128), GRB2 @ 21 (4.184991908), CDH1 @ 26 (4.048973937), YWHAE @ 31 (4.000171791), CTNNB1 @ 42 (3.926547961), HRAS @ 55 (3.85675947), RPS27A @ 64 (3.841632945), CLTC @ 68 (3.829350917), SRC @ 72 (3.815262485)	BTK	1483	2.53951	TP53 @ 7 (4.263878027), APP @ 20 (4.06357256), NFKB1 @ 24 (4.021122149), CDK9 @ 40 (3.936164117), MDM2 @ 47 (3.863162591), RELA @ 55 (3.832644555), TRAF6 @ 60 (3.802540496), AR @ 64 (3.786837043), GRB2 @ 65 (3.770730971), PRKACA @ 69 (3.762362936), STAT3 @ 75 (3.739433125), HSP90AB1 @ 77 (3.725182879), AKT1 @ 82 (3.716718023), RAD51 @ 85 (3.708628165), HSP90AA1 @ 87 (3.706481498)
CASP1	1628	2.50276	EGFR @ 18 (4.255273461), TP53 @ 29 (4.011818792)	PPP3CB	1498	2.53156	ELAVL1 @ 12 (4.178507033), JUN @ 42 (3.928420791), GRB2 @ 65 (3.770730971), RAD51 @ 85 (3.708628165)
PDPK1	1632	2.50165	GRB2 @ 21 (4.184991908), IGF1R @ 23 (4.061111546), KRAS @ 43 (3.922588159), PIK3CA @ 49 (3.87790566), PIK3R2 @ 57 (3.849769814), SRC @ 72 (3.815262485), PIK3CD @ 76 (3.806903236), PIK3CB @ 79 (3.788819698), PIK3R3 @ 88 (3.750814494), FOXO1 @ 90 (3.74627242), APP @ 91 (3.745785722)	IFNA8	1505	2.52851	EGFR @ 8 (4.259252678), APP @ 20 (4.06357256), NFKB1 @ 24 (4.021122149), IRF1 @ 39 (3.937384347), STAT1 @ 72 (3.759329862)
MYD88	1652	2.49444	YWHAE @ 31 (4.000171791), SRC @ 72 (3.815262485)	TRAF3	1506	2.52847	NFKB1 @ 24 (4.021122149), SRC @ 32 (3.98269232), RPS27A @ 35 (3.95946954), IRF1 @ 39 (3.937384347), UBA52 @ 41 (3.930125003), TRAF6 @ 60 (3.802540496)
MUC20	1653	2.49422	MUC1 @ 46 (3.897446897), MUC4 @ 97 (3.732637271)	CYLD	1507	2.52823	MAPRE1 @ 6 (4.289142824), TP53 @ 7 (4.263878027), NFKB1 @ 24 (4.021122149), RPS27A @ 35 (3.95946954), UBA52 @ 41 (3.930125003), TRAF6 @ 60 (3.802540496), AKT1 @ 82 (3.716718023), YWHAB @ 93 (3.686814642)
MVP	1665	2.48861	KPNA2 @ 20 (4.185288434), HSP90AB1 @ 47 (3.89559168), CLTC @ 68 (3.829350917)	MAPK11	1521	2.52076	TP53 @ 7 (4.263878027), EGFR @ 8 (4.259252678), APP @ 20 (4.06357256), SRC @ 32 (3.98269232), JUN @ 42 (3.928420791), AKT1 @ 82 (3.716718023), MED1 @ 84 (3.711224374), ESR1 @ 95 (3.677494751)
MUC16	1669	2.48809	CTNNB1 @ 42 (3.926547961), MUC1 @ 46 (3.897446897), MUC4 @ 97 (3.732637271)	IFIH1	1523	2.52013	APP @ 20 (4.06357256), NFKB1 @ 24 (4.021122149), RPS27A @ 35 (3.95946954), IRF1 @ 39 (3.937384347), UBA52 @ 41 (3.930125003), TRAF6 @ 60 (3.802540496)
MEFV	1674	2.48761	YWHAE @ 31 (4.000171791)	RAP1B	1525	2.51947	TP53 @ 7 (4.263878027), XRCC1 @ 9 (4.232647006), APP @ 20 (4.06357256), SRC @ 32 (3.98269232), PRKACA @ 69 (3.762362936)
NOS1	1684	2.48339	CTBP1 @ 34 (3.965358784), NRAS @ 41 (3.934319021), KRAS @ 43 (3.922588159), HRAS @ 55 (3.85675947)	IFNA6	1529	2.51869	EGFR @ 8 (4.259252678), NFKB1 @ 24 (4.021122149), IRF1 @ 39 (3.937384347), STAT1 @ 72 (3.759329862)
MUC13	1694	2.47886	MUC1 @ 46 (3.897446897), MUC4 @ 97 (3.732637271)	VTN	1553	2.50675	APP @ 20 (4.06357256), NFKB1 @ 24 (4.021122149), JUN @ 42 (3.928420791), PRKACA @ 69 (3.762362936)
APOB	1695	2.47876	EGFR @ 18 (4.255273461), APP @ 91 (3.745785722)	YES1	1562	2.50336	EGFR @ 8 (4.259252678), ELAVL1 @ 12 (4.178507033), YAP1 @ 15 (4.103703234), CTNNB1 @ 23 (4.032609254), ERBB4 @ 29 (3.99164713), SRC @ 32 (3.98269232), CDH1 @ 48 (3.861344958), RELA @ 55 (3.832644555), TRAF6 @ 60 (3.802540496), AR @ 64 (3.786837043), GRB2 @ 65 (3.770730971), HSP90AB1 @ 77 (3.725182879), NPM1 @ 79 (3.723229211), HSP90AA1 @ 87 (3.706481498)
POLR3B	1701	2.47476	TBP @ 13 (4.487899762)	IL1B	1567	2.50134	EP300 @ 3 (4.566455535), NFKB1 @ 24 (4.021122149), JUN @ 42 (3.928420791), RELA @ 55 (3.832644555), MYC @ 56 (3.825986802), TRAF6 @ 60 (3.802540496), STAT3 @ 75 (3.739433125), HSP90AA1 @ 87 (3.706481498)
MUC17	1708	2.4727	MUC1 @ 46 (3.897446897), MUC4 @ 97 (3.732637271)	WAS	1582	2.49522	EGFR @ 8 (4.259252678), KPNA2 @ 16 (4.098579501), SRC @ 32 (3.98269232), GRB2 @ 65 (3.770730971), AKT1 @ 82 (3.716718023)
MUC21	1708	2.4727	MUC1 @ 46 (3.897446897), MUC4 @ 97 (3.732637271)	MASP1	1598	2.48848	ERBB3 @ 2 (4.731127927), H2AX @ 33 (3.978872976)
MUC15	1711	2.47241	MUC1 @ 46 (3.897446897), MUC4 @ 97 (3.732637271)	DDX3X	1618	2.48038	TP53 @ 7 (4.263878027), ELAVL1 @ 12 (4.178507033), CDK1 @ 18 (4.078436677), NRF1 @ 22 (4.046253517), CTNNB1 @ 23 (4.032609254), JUN @ 42 (3.928420791), EZH2 @ 49 (3.859099803), MYC @ 56 (3.825986802), TRAF6 @ 60 (3.802540496), NPM1 @ 79 (3.723229211), CDK2 @ 89 (3.699623682), RAD51C @ 92 (3.688085298), ESR1 @ 95 (3.677494751)
MAPK7	1712	2.47179	YWHAE @ 31 (4.000171791), HSP90AB1 @ 47 (3.89559168), YWHAB @ 75 (3.807771122), APP @ 91 (3.745785722)	TBK1	1637	2.47338	APP @ 20 (4.06357256), NRF1 @ 22 (4.046253517), NFKB1 @ 24 (4.021122149), SRC @ 32 (3.98269232), RPS27A @ 35 (3.95946954), YWHAE @ 37 (3.946570154), MDM2 @ 47 (3.863162591), RELA @ 55 (3.832644555), TRAF6 @ 60 (3.802540496), STAT1 @ 72 (3.759329862), HSP90AB1 @ 77 (3.725182879), AKT1 @ 82 (3.716718023), HSP90AA1 @ 87 (3.706481498), ESR1 @ 95 (3.677494751)
POLR3A	1727	2.46423	TBP @ 13 (4.487899762), GTF2B @ 15 (4.432465953), HSP90AB1 @ 47 (3.89559168)	TAB2	1641	2.47261	APP @ 20 (4.06357256), NFKB1 @ 24 (4.021122149), ERBB4 @ 29 (3.99164713), HDAC2 @ 31 (3.989763953), RPS27A @ 35 (3.95946954), YWHAE @ 37 (3.946570154), ZBTB16 @ 38 (3.943619187), UBA52 @ 41 (3.930125003), HDAC1 @ 45 (3.875037284), RELA @ 55 (3.832644555), TRAF6 @ 60 (3.802540496), AR @ 64 (3.786837043), NPM1 @ 79 (3.723229211), HSP90AA1 @ 87 (3.706481498), ESR1 @ 95 (3.677494751), CLTC @ 98 (3.66…
PSMD2	1747	2.4563	CDK2 @ 3 (4.692024128), EGFR @ 18 (4.255273461), TP53 @ 29 (4.011818792), UBA52 @ 58 (3.849143067), RPS27A @ 64 (3.841632945), ERBB2 @ 67 (3.830356053), GNB1 @ 80 (3.788808915)	NFKBIB	1660	2.46435	KPNA2 @ 16 (4.098579501), APP @ 20 (4.06357256), NFKB1 @ 24 (4.021122149), RELA @ 55 (3.832644555), TRAF6 @ 60 (3.802540496), HSP90AB1 @ 77 (3.725182879), HSP90AA1 @ 87 (3.706481498), CLTC @ 98 (3.665966184)
IKBKE	1764	2.45204	GRB2 @ 21 (4.184991908), HSP90AB1 @ 47 (3.89559168), CLTC @ 68 (3.829350917), NPM1 @ 70 (3.818434018), CYCS @ 81 (3.787614979)	TLR2	1666	2.46286	EGFR @ 8 (4.259252678), NFKB1 @ 24 (4.021122149), RELA @ 55 (3.832644555), TRAF6 @ 60 (3.802540496), HSP90AB1 @ 77 (3.725182879), AKT1 @ 82 (3.716718023), HSP90AA1 @ 87 (3.706481498)
MUC12	1775	2.446	MUC1 @ 46 (3.897446897), MUC4 @ 97 (3.732637271)	HMGB1	1667	2.46195	TP53 @ 7 (4.263878027), CDK1 @ 18 (4.078436677), NFKB1 @ 24 (4.021122149), RELA @ 55 (3.832644555), AR @ 64 (3.786837043), HSP90AA1 @ 87 (3.706481498), CDK2 @ 89 (3.699623682), POU5F1 @ 90 (3.694597021)
LGALS3	1778	2.44453	EGFR @ 18 (4.255273461), RUNX1 @ 19 (4.230547681), CTNNB1 @ 42 (3.926547961), KRAS @ 43 (3.922588159), MUC1 @ 46 (3.897446897), APP @ 91 (3.745785722)	TXN	1675	2.4592	EP300 @ 3 (4.566455535), TP53 @ 7 (4.263878027), EGFR @ 8 (4.259252678), NFKB1 @ 24 (4.021122149), MYC @ 56 (3.825986802), TRAF6 @ 60 (3.802540496), HSP90AB1 @ 77 (3.725182879), NPM1 @ 79 (3.723229211), AKT1 @ 82 (3.716718023), HSP90AA1 @ 87 (3.706481498), CDK2 @ 89 (3.699623682)
LCP2	1782	2.44427	EGFR @ 18 (4.255273461), GRB2 @ 21 (4.184991908), EP300 @ 44 (3.908165976), SRC @ 72 (3.815262485), PLCG1 @ 73 (3.813392608), SHC1 @ 89 (3.749321692), APP @ 91 (3.745785722), PLCG2 @ 98 (3.731445794)	PSMA3	1680	2.45698	ELAVL1 @ 12 (4.178507033), NRF1 @ 22 (4.046253517), HDAC2 @ 31 (3.989763953), RPS27A @ 35 (3.95946954), UBA52 @ 41 (3.930125003), MDM2 @ 47 (3.863162591), MYC @ 56 (3.825986802), TRAF6 @ 60 (3.802540496), HSP90AB1 @ 77 (3.725182879), XRCC6 @ 80 (3.718531754), HSP90AA1 @ 87 (3.706481498)
FGR	1788	2.43998	EGFR @ 18 (4.255273461), HSP90AB1 @ 47 (3.89559168), PIK3CA @ 49 (3.87790566), PIK3R2 @ 57 (3.849769814), ERBB2 @ 67 (3.830356053), NPM1 @ 70 (3.818434018), SRC @ 72 (3.815262485), PIK3CD @ 76 (3.806903236), PIK3CB @ 79 (3.788819698), SHC1 @ 89 (3.749321692), STAT3 @ 92 (3.744179493)	RPS6KA1	1687	2.45408	RPS26 @ 4 (4.467848456), YWHAE @ 37 (3.946570154), GRB2 @ 65 (3.770730971), HSP90AB1 @ 77 (3.725182879), NPM1 @ 79 (3.723229211), HSP90AA1 @ 87 (3.706481498), YWHAB @ 93 (3.686814642), ESR1 @ 95 (3.677494751)
MAPK11	1794	2.43623	EGFR @ 18 (4.255273461), TP53 @ 29 (4.011818792), SRC @ 72 (3.815262485), GNB1 @ 80 (3.788808915), FOXO1 @ 90 (3.74627242), APP @ 91 (3.745785722)	ITGB2	1691	2.44961	EGFR @ 8 (4.259252678), SRC @ 32 (3.98269232), YWHAB @ 93 (3.686814642)
TLR2	1801	2.43376	EGFR @ 18 (4.255273461), HSP90AB1 @ 47 (3.89559168), DCN @ 53 (3.863807295), HRAS @ 55 (3.85675947)	ATG12	1692	2.44927	APP @ 20 (4.06357256)
GRN	1810	2.43163	CDK2 @ 3 (4.692024128), PIK3R2 @ 57 (3.849769814), NPM1 @ 70 (3.818434018)	PSMD2	1705	2.44307	TP53 @ 7 (4.263878027), EGFR @ 8 (4.259252678), NFKB1 @ 24 (4.021122149), RPS27A @ 35 (3.95946954), ZBTB16 @ 38 (3.943619187), CDK9 @ 40 (3.936164117), UBA52 @ 41 (3.930125003), JUN @ 42 (3.928420791), MDM2 @ 47 (3.863162591), ERBB2 @ 53 (3.843354357), MYC @ 56 (3.825986802), TRAF6 @ 60 (3.802540496), CDK2 @ 89 (3.699623682), ESR1 @ 95 (3.677494751)
AGER	1817	2.42801	GRB2 @ 21 (4.184991908), NRAS @ 41 (3.934319021), KRAS @ 43 (3.922588159), HRAS @ 55 (3.85675947), APP @ 91 (3.745785722)	NFKB2	1712	2.43882	TP53 @ 7 (4.263878027), NFKB1 @ 24 (4.021122149), SMARCA4 @ 27 (4.004652833), HDAC1 @ 45 (3.875037284), RELA @ 55 (3.832644555), TRAF6 @ 60 (3.802540496), SIRT1 @ 61 (3.802094612), STAT3 @ 75 (3.739433125), HSP90AB1 @ 77 (3.725182879), HSP90AA1 @ 87 (3.706481498), ESR1 @ 95 (3.677494751), CLTC @ 98 (3.665966184)
AHSG	1821	2.42686	INSR @ 10 (4.567054143), GRB2 @ 21 (4.184991908), DCN @ 53 (3.863807295)	LGALS3	1729	2.43304	EGFR @ 8 (4.259252678), APP @ 20 (4.06357256), CTNNB1 @ 23 (4.032609254), RUNX1 @ 71 (3.759465655), RAB7A @ 91 (3.694059873)
IRF7	1831	2.4252	INSR @ 10 (4.567054143), EP300 @ 44 (3.908165976)	PSMC1	1732	2.43173	TP53 @ 7 (4.263878027), APP @ 20 (4.06357256), RPS27A @ 35 (3.95946954), UBA52 @ 41 (3.930125003), JUN @ 42 (3.928420791), MDM2 @ 47 (3.863162591), MYC @ 56 (3.825986802), TRAF6 @ 60 (3.802540496), ESR1 @ 95 (3.677494751)
PAK1	1834	2.42429	EGFR @ 18 (4.255273461), GRB2 @ 21 (4.184991908), YWHAE @ 31 (4.000171791), CTBP1 @ 34 (3.965358784), CTNNB1 @ 42 (3.926547961), ERBB2 @ 67 (3.830356053), PLCG1 @ 73 (3.813392608), PIK3CB @ 79 (3.788819698), GNB1 @ 80 (3.788808915), SHC1 @ 89 (3.749321692), FOXO1 @ 90 (3.74627242), APP @ 91 (3.745785722)	CCT2	1735	2.4305	TP53 @ 7 (4.263878027), NFKB1 @ 24 (4.021122149), CDK9 @ 40 (3.936164117), JUN @ 42 (3.928420791), HDAC1 @ 45 (3.875037284), MYC @ 56 (3.825986802), GRB2 @ 65 (3.770730971), PRKACA @ 69 (3.762362936), HSP90AB1 @ 77 (3.725182879), NPM1 @ 79 (3.723229211), AKT1 @ 82 (3.716718023), HSP90AA1 @ 87 (3.706481498), CDK2 @ 89 (3.699623682)
CD81	1844	2.42026	EGFR @ 18 (4.255273461), NPM1 @ 70 (3.818434018), SHC1 @ 89 (3.749321692)	VCL	1736	2.43048	CTNNB1 @ 23 (4.032609254), SRC @ 32 (3.98269232), RPS27A @ 35 (3.95946954), YWHAE @ 37 (3.946570154), CDH1 @ 48 (3.861344958), GRB2 @ 65 (3.770730971), CDK2 @ 89 (3.699623682), CLTC @ 98 (3.665966184)
PSMC5	1850	2.41813	CDK2 @ 3 (4.692024128), GTF2B @ 15 (4.432465953), TP53 @ 29 (4.011818792), GRK2 @ 45 (3.906377942), UBA52 @ 58 (3.849143067), RPS27A @ 64 (3.841632945), NPM1 @ 70 (3.818434018)	MYO1C	1739	2.42976	JUN @ 42 (3.928420791), ERCC6 @ 63 (3.791796078), GRB2 @ 65 (3.770730971), CDK2 @ 89 (3.699623682), ESR1 @ 95 (3.677494751)
NLRP3	1860	2.41225	HSP90AB1 @ 47 (3.89559168), CBX5 @ 60 (3.848006823)	USP18	1759	2.42256	RPS27A @ 35 (3.95946954), IRF1 @ 39 (3.937384347), STAT1 @ 72 (3.759329862), HSP90AB1 @ 77 (3.725182879)
UBE2M	1868	2.40888	CDK2 @ 3 (4.692024128), TP53 @ 29 (4.011818792), TST @ 52 (3.866256659), RPS27A @ 64 (3.841632945), APP @ 91 (3.745785722)	SNAP25	1771	2.41562	EGFR @ 8 (4.259252678), APP @ 20 (4.06357256), PRKACA @ 69 (3.762362936)
APAF1	1870	2.40848	TP53 @ 29 (4.011818792), YWHAE @ 31 (4.000171791), HSP90AB1 @ 47 (3.89559168), CYCS @ 81 (3.787614979)	CCR2	1781	2.41252	STAT3 @ 75 (3.739433125)
CFL1	1874	2.40709	CDK2 @ 3 (4.692024128), EGFR @ 18 (4.255273461), GRB2 @ 21 (4.184991908), YWHAE @ 31 (4.000171791), UBA52 @ 58 (3.849143067), TERF1 @ 65 (3.835912394), NPM1 @ 70 (3.818434018), SRC @ 72 (3.815262485), ERBB4 @ 84 (3.769879596), APP @ 91 (3.745785722)	CXCR1	1785	2.4117	CDK1 @ 18 (4.078436677)
PTPRB	1882	2.40464	INSR @ 10 (4.567054143), EGFR @ 18 (4.255273461), CTNNB1 @ 42 (3.926547961), ERBB2 @ 67 (3.830356053)	MUC16	1803	2.40696	CTNNB1 @ 23 (4.032609254)
MAP3K1	1883	2.40455	GRB2 @ 21 (4.184991908), TP53 @ 29 (4.011818792), YWHAE @ 31 (4.000171791), NRAS @ 41 (3.934319021), KRAS @ 43 (3.922588159), HSP90AB1 @ 47 (3.89559168), HRAS @ 55 (3.85675947), NPM1 @ 70 (3.818434018)	PPP2R5D	1816	2.4024	CHEK2 @ 10 (4.196264648), FEN1 @ 57 (3.81699797), PRKACA @ 69 (3.762362936), SOX2 @ 70 (3.761055665), AKT1 @ 82 (3.716718023), YWHAB @ 93 (3.686814642)
PSMD4	1884	2.40441	EGFR @ 18 (4.255273461), TP53 @ 29 (4.011818792), UBA52 @ 58 (3.849143067), RPS27A @ 64 (3.841632945), NPM1 @ 70 (3.818434018), APP @ 91 (3.745785722)	ATG7	1822	2.40063	EP300 @ 3 (4.566455535), TP53 @ 7 (4.263878027), APP @ 20 (4.06357256), NRF1 @ 22 (4.046253517), UBA52 @ 41 (3.930125003), SIRT1 @ 61 (3.802094612), STAT1 @ 72 (3.759329862), AKT1 @ 82 (3.716718023), KEAP1 @ 83 (3.711971154)
PSMA5	1889	2.40368	CDK2 @ 3 (4.692024128), FOXP3 @ 40 (3.94032475), UBA52 @ 58 (3.849143067), RPS27A @ 64 (3.841632945), APP @ 91 (3.745785722)	PRKCE	1830	2.39839	EGFR @ 8 (4.259252678), ELAVL1 @ 12 (4.178507033), HDAC2 @ 31 (3.989763953), SRC @ 32 (3.98269232), STAT1 @ 72 (3.759329862), STAT3 @ 75 (3.739433125), HSP90AB1 @ 77 (3.725182879), KEAP1 @ 83 (3.711971154), HSP90AA1 @ 87 (3.706481498)
PECAM1	1897	2.40138	CTNNB1 @ 42 (3.926547961), SRC @ 72 (3.815262485), PLCG1 @ 73 (3.813392608), INS @ 94 (3.741981928)	ITPR1	1834	2.39711	BRCA1 @ 14 (4.109727894), CDK1 @ 18 (4.078436677), PRKACA @ 69 (3.762362936), AKT1 @ 82 (3.716718023)
RIPK3	1899	2.40099	YWHAE @ 31 (4.000171791), HSP90AB1 @ 47 (3.89559168), CLTC @ 68 (3.829350917), GNB1 @ 80 (3.788808915)	RAB6A	1839	2.39514	ELAVL1 @ 12 (4.178507033), NRF1 @ 22 (4.046253517), RAB7A @ 91 (3.694059873)
MYO1C	1905	2.39743	CDK2 @ 3 (4.692024128), GRB2 @ 21 (4.184991908), SHC1 @ 89 (3.749321692), SQOR @ 93 (3.74216698)	LIMK1	1852	2.39075	ELAVL1 @ 12 (4.178507033), APP @ 20 (4.06357256), PRKACA @ 69 (3.762362936), BMPR1B @ 76 (3.725317326), HSP90AB1 @ 77 (3.725182879), HSP90AA1 @ 87 (3.706481498)
MAP3K7	1913	2.39527	YWHAE @ 31 (4.000171791), HSP90AB1 @ 47 (3.89559168), HRAS @ 55 (3.85675947), RPS27A @ 64 (3.841632945), CLTC @ 68 (3.829350917), STAT3 @ 92 (3.744179493)	POLR3A	1857	2.3894	MYC @ 56 (3.825986802), HSP90AB1 @ 77 (3.725182879), MED1 @ 84 (3.711224374)
STAT6	1937	2.38743	TP53 @ 29 (4.011818792), EP300 @ 44 (3.908165976), SRC @ 72 (3.815262485), STAT3 @ 92 (3.744179493)	CXCL1	1885	2.37787	NFKB1 @ 24 (4.021122149), JUN @ 42 (3.928420791), RELA @ 55 (3.832644555), STAT3 @ 75 (3.739433125), ESR1 @ 95 (3.677494751)
NOS3	1953	2.38158	CTNNB1 @ 42 (3.926547961), HSP90AB1 @ 47 (3.89559168), PLCG1 @ 73 (3.813392608), APP @ 91 (3.745785722), PLCG2 @ 98 (3.731445794)	RIPK1	1886	2.37783	EP300 @ 3 (4.566455535), EGFR @ 8 (4.259252678), NFKB1 @ 24 (4.021122149), RPS27A @ 35 (3.95946954), RELA @ 55 (3.832644555), TRAF6 @ 60 (3.802540496), HSP90AB1 @ 77 (3.725182879), HSP90AA1 @ 87 (3.706481498)
PPIA	1964	2.3762	CDK2 @ 3 (4.692024128), GRB2 @ 21 (4.184991908), HSP90AB1 @ 47 (3.89559168), NPM1 @ 70 (3.818434018), APP @ 91 (3.745785722)	MUC5AC	1890	2.3763	MYC @ 56 (3.825986802)
MME	1993	2.36814	ADCYAP1 @ 32 (3.997515734), NPPA @ 77 (3.798865266), PIK3CB @ 79 (3.788819698), SHC1 @ 89 (3.749321692), APP @ 91 (3.745785722)	GRAP2	1899	2.37276	EGFR @ 8 (4.259252678), SRC @ 32 (3.98269232), YWHAE @ 37 (3.946570154), ERBB2 @ 53 (3.843354357), AR @ 64 (3.786837043), GRB2 @ 65 (3.770730971)
TTR	1995	2.36793	APP @ 91 (3.745785722), INS @ 94 (3.741981928)	ITGAM	1901	2.37201	SRC @ 32 (3.98269232), STAT1 @ 72 (3.759329862), STAT3 @ 75 (3.739433125)
CTSB	1997	2.36736	APP @ 91 (3.745785722), INS @ 94 (3.741981928)	VAV3	1911	2.36804	ERBB3 @ 2 (4.731127927), EGFR @ 8 (4.259252678), SRC @ 32 (3.98269232), ERBB2 @ 53 (3.843354357), AR @ 64 (3.786837043), GRB2 @ 65 (3.770730971), ESR1 @ 95 (3.677494751)
BIRC2	2006	2.36188	EGFR @ 18 (4.255273461), UBA52 @ 58 (3.849143067), RPS27A @ 64 (3.841632945)	CASP1	1936	2.35714	TP53 @ 7 (4.263878027), EGFR @ 8 (4.259252678), NFKB1 @ 24 (4.021122149), AR @ 64 (3.786837043), KEAP1 @ 83 (3.711971154)
KRT1	2008	2.36155	EGFR @ 18 (4.255273461), GRB2 @ 21 (4.184991908), CDH1 @ 26 (4.048973937), PIK3R2 @ 57 (3.849769814), FANCC @ 83 (3.776114382), SHC1 @ 89 (3.749321692)	LCP2	1962	2.34825	EP300 @ 3 (4.566455535), EGFR @ 8 (4.259252678), APP @ 20 (4.06357256), SRC @ 32 (3.98269232), GRB2 @ 65 (3.770730971), AKT1 @ 82 (3.716718023)
FGA	2009	2.36146	APP @ 91 (3.745785722)	MUC13	2020	2.32896	RAB7A @ 91 (3.694059873)
TANK	2010	2.36122	KPNA2 @ 20 (4.185288434), CLTC @ 68 (3.829350917), APP @ 91 (3.745785722)	TLR9	2048	2.31526	NFKB1 @ 24 (4.021122149), SRC @ 32 (3.98269232), TRAF6 @ 60 (3.802540496), GRB2 @ 65 (3.770730971)
PCBP2	2014	2.3599	CDK2 @ 3 (4.692024128)	BIRC2	2051	2.31446	EGFR @ 8 (4.259252678), NFKB1 @ 24 (4.021122149), RPS27A @ 35 (3.95946954), UBA52 @ 41 (3.930125003), RELA @ 55 (3.832644555), TRAF6 @ 60 (3.802540496)
SIRPA	2029	2.35496	GRB2 @ 21 (4.184991908), IGF1R @ 23 (4.061111546), SRC @ 72 (3.815262485)	ACLY	2074	2.3061	KPNA2 @ 16 (4.098579501), APP @ 20 (4.06357256), HDAC2 @ 31 (3.989763953), JUN @ 42 (3.928420791), HDAC1 @ 45 (3.875037284), PRKACA @ 69 (3.762362936)
SERPINA1	2047	2.3485	APP @ 91 (3.745785722)	TLR3	2077	2.30534	EGFR @ 8 (4.259252678), CHEK2 @ 10 (4.196264648), NFKB1 @ 24 (4.021122149), SRC @ 32 (3.98269232), TRAF6 @ 60 (3.802540496), STAT1 @ 72 (3.759329862)
PSMC2	2048	2.34829	TBP @ 13 (4.487899762), GTF2B @ 15 (4.432465953), GRB2 @ 21 (4.184991908), GRK2 @ 45 (3.906377942), UBA52 @ 58 (3.849143067), RPS27A @ 64 (3.841632945)	DYNC1LI1	2091	2.29947	NRF1 @ 22 (4.046253517), MYC @ 56 (3.825986802), RAB7A @ 91 (3.694059873)
ITPR3	2052	2.34775	GRB2 @ 21 (4.184991908), PLCG1 @ 73 (3.813392608), CYCS @ 81 (3.787614979), PLCG2 @ 98 (3.731445794)	ADAM10	2096	2.29853	APP @ 20 (4.06357256), NRF1 @ 22 (4.046253517), CDH1 @ 48 (3.861344958), AR @ 64 (3.786837043), GRB2 @ 65 (3.770730971)
IL1B	2054	2.34714	EP300 @ 44 (3.908165976), STAT3 @ 92 (3.744179493)	PSEN1	2100	2.29761	APP @ 20 (4.06357256), CTNNB1 @ 23 (4.032609254), ERBB4 @ 29 (3.99164713), CDH1 @ 48 (3.861344958), TRAF6 @ 60 (3.802540496), GRB2 @ 65 (3.770730971), PRKACA @ 69 (3.762362936)
PIK3R4	2055	2.34641	YWHAE @ 31 (4.000171791), PIK3CA @ 49 (3.87790566), YWHAB @ 75 (3.807771122), PIK3CD @ 76 (3.806903236), PIK3CB @ 79 (3.788819698), PIK3R3 @ 88 (3.750814494)	MEF2A	2112	2.29367	EP300 @ 3 (4.566455535), NRF1 @ 22 (4.046253517), CTNNB1 @ 23 (4.032609254), JUN @ 42 (3.928420791), HDAC1 @ 45 (3.875037284), H3-4 @ 88 (3.699941274)
PPP3CA	2061	2.34565	GRB2 @ 21 (4.184991908), PLCG1 @ 73 (3.813392608), PLCG2 @ 98 (3.731445794)	CAPZA2	2117	2.29268	ELAVL1 @ 12 (4.178507033), NRF1 @ 22 (4.046253517)
PNP	2063	2.34555	CDK2 @ 3 (4.692024128), TP53 @ 29 (4.011818792)	CFL1	2119	2.29166	EGFR @ 8 (4.259252678), APP @ 20 (4.06357256), NFKB1 @ 24 (4.021122149), ERBB4 @ 29 (3.99164713), SRC @ 32 (3.98269232), H2AX @ 33 (3.978872976), YWHAE @ 37 (3.946570154), UBA52 @ 41 (3.930125003), JUN @ 42 (3.928420791), MYC @ 56 (3.825986802), GRB2 @ 65 (3.770730971), PRKACA @ 69 (3.762362936), NPM1 @ 79 (3.723229211), CDK2 @ 89 (3.699623682), RAB7A @ 91 (3.694059873), ESR1 @ 95 (3.677494751)
FGB	2090	2.33728	PIK3R3 @ 88 (3.750814494)	SRP14	2141	2.28674	RPS26 @ 4 (4.467848456), RPS27A @ 35 (3.95946954), UBA52 @ 41 (3.930125003), JUN @ 42 (3.928420791), MYC @ 56 (3.825986802), GRB2 @ 65 (3.770730971)
IRF3	2111	2.33024	CTNNB1 @ 42 (3.926547961), EP300 @ 44 (3.908165976), HSP90AB1 @ 47 (3.89559168), FOXO1 @ 90 (3.74627242)	TOLLIP	2149	2.28322	ELAVL1 @ 12 (4.178507033), NRF1 @ 22 (4.046253517), ZBTB16 @ 38 (3.943619187), TRAF6 @ 60 (3.802540496)
PSMC6	2125	2.32532	CDK2 @ 3 (4.692024128), CYB5R2 @ 37 (3.950721474), GRK2 @ 45 (3.906377942), UBA52 @ 58 (3.849143067), RPS27A @ 64 (3.841632945)	SEM1	2167	2.27371	BRCA1 @ 14 (4.109727894), RPS27A @ 35 (3.95946954), FEN1 @ 57 (3.81699797), RAD51 @ 85 (3.708628165), RAD51C @ 92 (3.688085298)
UBE2N	2150	2.31716	CDK2 @ 3 (4.692024128), TP53 @ 29 (4.011818792), UBA52 @ 58 (3.849143067), RPS27A @ 64 (3.841632945)	MAP3K1	2168	2.27298	TP53 @ 7 (4.263878027), BRCA1 @ 14 (4.109727894), NFKB1 @ 24 (4.021122149), YWHAE @ 37 (3.946570154), JUN @ 42 (3.928420791), MYC @ 56 (3.825986802), TRAF6 @ 60 (3.802540496), GRB2 @ 65 (3.770730971), HSP90AB1 @ 77 (3.725182879), NPM1 @ 79 (3.723229211), HSP90AA1 @ 87 (3.706481498), ESR1 @ 95 (3.677494751)
GOLGA7	2153	2.31624	NRAS @ 41 (3.934319021), HRAS @ 55 (3.85675947)	FTH1	2172	2.27109	KPNA2 @ 16 (4.098579501), YWHAE @ 37 (3.946570154), GRB2 @ 65 (3.770730971)
LYZ	2185	2.30418	CDK2 @ 3 (4.692024128)	PPP3R1	2173	2.2708	ELAVL1 @ 12 (4.178507033)
CAT	2190	2.30188	GRB2 @ 21 (4.184991908), GNAS @ 27 (4.026244404), APP @ 91 (3.745785722)	CASP9	2184	2.26877	BRCA1 @ 14 (4.109727894), CDK1 @ 18 (4.078436677), JUN @ 42 (3.928420791), MDM2 @ 47 (3.863162591), PRKACA @ 69 (3.762362936), AKT1 @ 82 (3.716718023)
PSMA3	2196	2.2992	GTF2B @ 15 (4.432465953), KRAS @ 43 (3.922588159), HSP90AB1 @ 47 (3.89559168), UBA52 @ 58 (3.849143067), RPS27A @ 64 (3.841632945)	PSMA6	2187	2.26784	BRCA1 @ 14 (4.109727894), CDK1 @ 18 (4.078436677), RPS27A @ 35 (3.95946954), UBA52 @ 41 (3.930125003), JUN @ 42 (3.928420791), MDM2 @ 47 (3.863162591), TRAF6 @ 60 (3.802540496), CDK2 @ 89 (3.699623682)
NOS2	2211	2.29559	YWHAE @ 31 (4.000171791), HSP90AB1 @ 47 (3.89559168), NPM1 @ 70 (3.818434018), SRC @ 72 (3.815262485), STAT3 @ 92 (3.744179493), SQOR @ 93 (3.74216698)	PSMD13	2201	2.26383	RPS27A @ 35 (3.95946954), UBA52 @ 41 (3.930125003), JUN @ 42 (3.928420791), TRAF6 @ 60 (3.802540496), GRB2 @ 65 (3.770730971)
IRAK4	2220	2.29358	TBPL1 @ 9 (4.587803787)	PSMD14	2219	2.25444	RPS27A @ 35 (3.95946954), UBA52 @ 41 (3.930125003), JUN @ 42 (3.928420791), TRAF6 @ 60 (3.802540496), GRB2 @ 65 (3.770730971)
SEMG1	2224	2.29289	CDK2 @ 3 (4.692024128), PIK3R2 @ 57 (3.849769814)	MAVS	2224	2.25223	NFKB1 @ 24 (4.021122149), SRC @ 32 (3.98269232), RPS27A @ 35 (3.95946954), UBA52 @ 41 (3.930125003), RELA @ 55 (3.832644555), TRAF6 @ 60 (3.802540496), STAT1 @ 72 (3.759329862), HSP90AB1 @ 77 (3.725182879), HSP90AA1 @ 87 (3.706481498)
TOM1	2231	2.29043	YAP1 @ 8 (4.590383402), UBA52 @ 58 (3.849143067), RPS27A @ 64 (3.841632945), CLTC @ 68 (3.829350917), APP @ 91 (3.745785722)	CDA	2225	2.252	KPNA2 @ 16 (4.098579501)
ATG5	2241	2.28715	TERF2 @ 48 (3.885006348)	PSMA7	2227	2.25168	EGFR @ 8 (4.259252678), APP @ 20 (4.06357256), NFKB1 @ 24 (4.021122149), RPS27A @ 35 (3.95946954), UBA52 @ 41 (3.930125003), JUN @ 42 (3.928420791), MDM2 @ 47 (3.863162591), MYC @ 56 (3.825986802), SIRT1 @ 61 (3.802094612), HSP90AB1 @ 77 (3.725182879), RAB7A @ 91 (3.694059873)
USP14	2250	2.28452	CDK1 @ 36 (3.960479767), UBA52 @ 58 (3.849143067), RPS27A @ 64 (3.841632945), FANCC @ 83 (3.776114382)	TXK	2231	2.25086	ERBB3 @ 2 (4.731127927), SRC @ 32 (3.98269232), ERBB2 @ 53 (3.843354357), GRB2 @ 65 (3.770730971)
NFATC2	2260	2.28196	RUNX1 @ 19 (4.230547681), FOXP3 @ 40 (3.94032475), EP300 @ 44 (3.908165976)	PSMD11	2245	2.24682	TP53 @ 7 (4.263878027), APP @ 20 (4.06357256), RPS27A @ 35 (3.95946954), ZBTB16 @ 38 (3.943619187), UBA52 @ 41 (3.930125003), JUN @ 42 (3.928420791), TRAF6 @ 60 (3.802540496), GRB2 @ 65 (3.770730971), PRKACA @ 69 (3.762362936), CDK2 @ 89 (3.699623682)
RPS6KA3	2261	2.28094	TP53 @ 29 (4.011818792), NRAS @ 41 (3.934319021), KRAS @ 43 (3.922588159), HSP90AB1 @ 47 (3.89559168), HRAS @ 55 (3.85675947), SRC @ 72 (3.815262485), STAT3 @ 92 (3.744179493)	PSMC5	2248	2.24547	TP53 @ 7 (4.263878027), RPS27A @ 35 (3.95946954), UBA52 @ 41 (3.930125003), JUN @ 42 (3.928420791), MDM2 @ 47 (3.863162591), MYC @ 56 (3.825986802), TRAF6 @ 60 (3.802540496), PRKACA @ 69 (3.762362936), TP53BP1 @ 78 (3.725074195), NPM1 @ 79 (3.723229211), AKT1 @ 82 (3.716718023), H3-4 @ 88 (3.699941274), CDK2 @ 89 (3.699623682), ESR1 @ 95 (3.677494751)
TBK1	2266	2.27942	YWHAE @ 31 (4.000171791), HSP90AB1 @ 47 (3.89559168), RPS27A @ 64 (3.841632945), SRC @ 72 (3.815262485), APP @ 91 (3.745785722)	HUWE1	2249	2.24527	TP53 @ 7 (4.263878027), BRCA1 @ 14 (4.109727894), CTNNB1 @ 23 (4.032609254), HDAC2 @ 31 (3.989763953), RPS27A @ 35 (3.95946954), UBA52 @ 41 (3.930125003), MDM2 @ 47 (3.863162591), MYC @ 56 (3.825986802), ATM @ 59 (3.803938404), POLB @ 86 (3.707406537), ESR1 @ 95 (3.677494751), LARP7 @ 96 (3.6762156)
RIGI	2274	2.27763	UBA52 @ 58 (3.849143067), RPS27A @ 64 (3.841632945), SRC @ 72 (3.815262485)	ATP6AP2	2258	2.2429	ZBTB16 @ 38 (3.943619187), RAB7A @ 91 (3.694059873)
LAT	2291	2.2737	EGFR @ 18 (4.255273461), GRB2 @ 21 (4.184991908), PLCG1 @ 73 (3.813392608), SHC1 @ 89 (3.749321692), PLCG2 @ 98 (3.731445794)	PSME3	2273	2.23779	TP53 @ 7 (4.263878027), CHEK2 @ 10 (4.196264648), MDM2 @ 47 (3.863162591), SIRT1 @ 61 (3.802094612), NPM1 @ 79 (3.723229211)
PPP3CB	2299	2.27164	GRB2 @ 21 (4.184991908), PLCG1 @ 73 (3.813392608), PLCG2 @ 98 (3.731445794)	FADD	2304	2.22467	NRF1 @ 22 (4.046253517), NFKB1 @ 24 (4.021122149), TRAF6 @ 60 (3.802540496), STAT1 @ 72 (3.759329862)
HBB	2309	2.26909	CDK2 @ 3 (4.692024128)	CDK13	2305	2.22265	CDK1 @ 18 (4.078436677), CDK9 @ 40 (3.936164117), HSP90AA1 @ 87 (3.706481498), CDK2 @ 89 (3.699623682)
TREM2	2317	2.26745	APP @ 91 (3.745785722), PLCG2 @ 98 (3.731445794)	PSMC3	2338	2.21237	TP53 @ 7 (4.263878027), NFKB1 @ 24 (4.021122149), RPS27A @ 35 (3.95946954), UBA52 @ 41 (3.930125003), JUN @ 42 (3.928420791), MDM2 @ 47 (3.863162591), MYC @ 56 (3.825986802), TRAF6 @ 60 (3.802540496), AR @ 64 (3.786837043), STAT1 @ 72 (3.759329862)
ATG7	2321	2.2669	TP53 @ 29 (4.011818792), EP300 @ 44 (3.908165976), UBA52 @ 58 (3.849143067), FOXO1 @ 90 (3.74627242), APP @ 91 (3.745785722)	CCT8	2342	2.21046	TP53 @ 7 (4.263878027), APP @ 20 (4.06357256), NRF1 @ 22 (4.046253517), CDK9 @ 40 (3.936164117), JUN @ 42 (3.928420791), HDAC1 @ 45 (3.875037284), RELA @ 55 (3.832644555), MYC @ 56 (3.825986802), GRB2 @ 65 (3.770730971), PRKACA @ 69 (3.762362936), HSP90AB1 @ 77 (3.725182879), HSP90AA1 @ 87 (3.706481498), CDK2 @ 89 (3.699623682)
RIPK2	2328	2.26498	HSP90AB1 @ 47 (3.89559168)	CD59	2359	2.20473	MAPRE1 @ 6 (4.289142824), EGFR @ 8 (4.259252678), NRF1 @ 22 (4.046253517), SRC @ 32 (3.98269232), GRB2 @ 65 (3.770730971)
AP1M1	2333	2.26389	EGFR @ 18 (4.255273461), IKZF1 @ 28 (4.018602888), CLTC @ 68 (3.829350917)	UBE2M	2363	2.20419	TP53 @ 7 (4.263878027), APP @ 20 (4.06357256), NRF1 @ 22 (4.046253517), RPS27A @ 35 (3.95946954), JUN @ 42 (3.928420791), MDM2 @ 47 (3.863162591), TRAF6 @ 60 (3.802540496), CDK2 @ 89 (3.699623682)
NFKB2	2338	2.26169	TP53 @ 29 (4.011818792), SIN3A @ 33 (3.966211795), HSP90AB1 @ 47 (3.89559168), CLTC @ 68 (3.829350917), STAT3 @ 92 (3.744179493)	HP	2380	2.19662	ELAVL1 @ 12 (4.178507033), GRB2 @ 65 (3.770730971), CDK2 @ 89 (3.699623682)
CASP4	2344	2.26008	CDK2 @ 3 (4.692024128), APP @ 91 (3.745785722)	TUBB4B	2382	2.19627	EGFR @ 8 (4.259252678), NRF1 @ 22 (4.046253517), NFKB1 @ 24 (4.021122149), YWHAE @ 37 (3.946570154), CDK9 @ 40 (3.936164117), JUN @ 42 (3.928420791), EZH2 @ 49 (3.859099803), GRB2 @ 65 (3.770730971), PRKACA @ 69 (3.762362936), AKT1 @ 82 (3.716718023), HSP90AA1 @ 87 (3.706481498), CDK2 @ 89 (3.699623682), RAB7A @ 91 (3.694059873), YWHAB @ 93 (3.686814642)
FCER1G	2377	2.24912	PIK3CA @ 49 (3.87790566), PIK3R2 @ 57 (3.849769814), PIK3CD @ 76 (3.806903236), PIK3CB @ 79 (3.788819698), PIK3R3 @ 88 (3.750814494), PLCG2 @ 98 (3.731445794)	FGA	2383	2.19627	APP @ 20 (4.06357256)
ERP44	2385	2.24706	YAP1 @ 8 (4.590383402), FHL2 @ 82 (3.784994951)	GSTP1	2386	2.19537	EGFR @ 8 (4.259252678), JUN @ 42 (3.928420791), MDM2 @ 47 (3.863162591), GRB2 @ 65 (3.770730971), CDK2 @ 89 (3.699623682)
PSMD11	2404	2.24276	CDK2 @ 3 (4.692024128), GRB2 @ 21 (4.184991908), TP53 @ 29 (4.011818792), UBA52 @ 58 (3.849143067), RPS27A @ 64 (3.841632945), APP @ 91 (3.745785722)	ROCK1	2388	2.19388	NRF1 @ 22 (4.046253517), CTNNB1 @ 23 (4.032609254), NFKB1 @ 24 (4.021122149), SOX9 @ 50 (3.856009024), RELA @ 55 (3.832644555), MYC @ 56 (3.825986802), HSP90AB1 @ 77 (3.725182879), HSP90AA1 @ 87 (3.706481498)
PSMA6	2416	2.23955	CDK2 @ 3 (4.692024128), CDK1 @ 36 (3.960479767), UBA52 @ 58 (3.849143067), RPS27A @ 64 (3.841632945)	IRAK1	2401	2.18903	NFKB1 @ 24 (4.021122149), JUN @ 42 (3.928420791), RELA @ 55 (3.832644555), MYC @ 56 (3.825986802), TRAF6 @ 60 (3.802540496), STAT1 @ 72 (3.759329862), STAT3 @ 75 (3.739433125), AKT1 @ 82 (3.716718023), HSP90AA1 @ 87 (3.706481498), H3-4 @ 88 (3.699941274)
UBE2D2	2426	2.238	TP53 @ 29 (4.011818792), CTNNB1 @ 42 (3.926547961), UBA52 @ 58 (3.849143067), RPS27A @ 64 (3.841632945)	PSMC2	2407	2.18519	NFKB1 @ 24 (4.021122149), RPS27A @ 35 (3.95946954), UBA52 @ 41 (3.930125003), JUN @ 42 (3.928420791), MYC @ 56 (3.825986802), TRAF6 @ 60 (3.802540496), GRB2 @ 65 (3.770730971), ESR1 @ 95 (3.677494751)
CAPN1	2441	2.23471	TP53 @ 29 (4.011818792), FHL2 @ 82 (3.784994951), FANCC @ 83 (3.776114382), STAT3 @ 92 (3.744179493)	TRIM21	2410	2.18362	EGFR @ 8 (4.259252678), RPS27A @ 35 (3.95946954), UBA52 @ 41 (3.930125003), HDAC1 @ 45 (3.875037284), ERBB2 @ 53 (3.843354357), MYC @ 56 (3.825986802), STAT1 @ 72 (3.759329862), HSP90AB1 @ 77 (3.725182879), NPM1 @ 79 (3.723229211), CDK2 @ 89 (3.699623682)
SDCBP	2469	2.22659	EGFR @ 18 (4.255273461), IKZF1 @ 28 (4.018602888), CTNNB1 @ 42 (3.926547961), SRC @ 72 (3.815262485)	RAB31	2428	2.17737	ELAVL1 @ 12 (4.178507033)
NOD1	2501	2.2175	HSP90AB1 @ 47 (3.89559168), UBA52 @ 58 (3.849143067), RPS27A @ 64 (3.841632945)	PAK2	2441	2.17164	EP300 @ 3 (4.566455535), ELAVL1 @ 12 (4.178507033), APP @ 20 (4.06357256), SRC @ 32 (3.98269232), YWHAE @ 37 (3.946570154), JUN @ 42 (3.928420791), MYC @ 56 (3.825986802), GRB2 @ 65 (3.770730971), YWHAB @ 93 (3.686814642)
IRAK1	2531	2.20849	HRAS @ 55 (3.85675947), STAT3 @ 92 (3.744179493)	FGR	2458	2.1686	EGFR @ 8 (4.259252678), SRC @ 32 (3.98269232), ERBB2 @ 53 (3.843354357), AR @ 64 (3.786837043), STAT3 @ 75 (3.739433125), HSP90AB1 @ 77 (3.725182879), NPM1 @ 79 (3.723229211), AKT1 @ 82 (3.716718023), HSP90AA1 @ 87 (3.706481498)
RHOG	2548	2.20135	PIK3CA @ 49 (3.87790566), PIK3CB @ 79 (3.788819698)	WASL	2476	2.16042	EP300 @ 3 (4.566455535), EGFR @ 8 (4.259252678), ELAVL1 @ 12 (4.178507033), APP @ 20 (4.06357256), SRC @ 32 (3.98269232), GRB2 @ 65 (3.770730971), HSP90AB1 @ 77 (3.725182879), AKT1 @ 82 (3.716718023), HSP90AA1 @ 87 (3.706481498), CLTC @ 98 (3.665966184)
PRSS3	2549	2.20098	CDK2 @ 3 (4.692024128), GRK2 @ 45 (3.906377942), SHC1 @ 89 (3.749321692), APP @ 91 (3.745785722)	SERPINA1	2479	2.15901	APP @ 20 (4.06357256)
ALDOA	2555	2.19982	CDK2 @ 3 (4.692024128), EGFR @ 18 (4.255273461), HSP90AB1 @ 47 (3.89559168), TERF1 @ 65 (3.835912394)	SIRPA	2503	2.15158	SRC @ 32 (3.98269232), GRB2 @ 65 (3.770730971)
PSMD14	2557	2.1996	GRB2 @ 21 (4.184991908), UBA52 @ 58 (3.849143067), RPS27A @ 64 (3.841632945)	ACTR2	2509	2.14927	ELAVL1 @ 12 (4.178507033), TRAF6 @ 60 (3.802540496), GRB2 @ 65 (3.770730971), ESR1 @ 95 (3.677494751)
TRIM21	2574	2.19482	CDK2 @ 3 (4.692024128), EGFR @ 18 (4.255273461), HSP90AB1 @ 47 (3.89559168), UBA52 @ 58 (3.849143067), RPS27A @ 64 (3.841632945), ERBB2 @ 67 (3.830356053), NPM1 @ 70 (3.818434018)	ITPR3	2513	2.14802	GRB2 @ 65 (3.770730971), PRKACA @ 69 (3.762362936), AKT1 @ 82 (3.716718023)
RAB10	2578	2.19375	APP @ 91 (3.745785722)	PLAU	2514	2.1478	ELAVL1 @ 12 (4.178507033), MYC @ 56 (3.825986802)
WASL	2582	2.19215	EGFR @ 18 (4.255273461), GRB2 @ 21 (4.184991908), EP300 @ 44 (3.908165976), HSP90AB1 @ 47 (3.89559168), CLTC @ 68 (3.829350917), SRC @ 72 (3.815262485), APP @ 91 (3.745785722)	CFH	2528	2.14189	EP300 @ 3 (4.566455535), ZBTB16 @ 38 (3.943619187), GRB2 @ 65 (3.770730971)
IFNA1	2587	2.19155	EGFR @ 18 (4.255273461)	PDPK1	2532	2.1415	APP @ 20 (4.06357256), SRC @ 32 (3.98269232), MDM2 @ 47 (3.863162591), GRB2 @ 65 (3.770730971), PRKACA @ 69 (3.762362936), XRCC6 @ 80 (3.718531754), AKT1 @ 82 (3.716718023), HSP90AA1 @ 87 (3.706481498)
RASGRP1	2596	2.18936	GRB2 @ 21 (4.184991908), NRAS @ 41 (3.934319021), KRAS @ 43 (3.922588159), HRAS @ 55 (3.85675947), PLCG1 @ 73 (3.813392608)	TAB1	2557	2.13456	EGFR @ 8 (4.259252678), NFKB1 @ 24 (4.021122149), MDM2 @ 47 (3.863162591), RELA @ 55 (3.832644555), TRAF6 @ 60 (3.802540496), GRB2 @ 65 (3.770730971), HSP90AB1 @ 77 (3.725182879), NPM1 @ 79 (3.723229211), HSP90AA1 @ 87 (3.706481498)
FADD	2609	2.18629	CYCS @ 81 (3.787614979)	LCN2	2569	2.13061	APP @ 20 (4.06357256), STAT3 @ 75 (3.739433125)
RIPK1	2611	2.1861	EGFR @ 18 (4.255273461), EP300 @ 44 (3.908165976), HSP90AB1 @ 47 (3.89559168), RPS27A @ 64 (3.841632945)	NOS1	2582	2.12697	HDAC1 @ 45 (3.875037284), PRKACA @ 69 (3.762362936), AKT1 @ 82 (3.716718023), HSP90AA1 @ 87 (3.706481498)
ABI1	2669	2.16986	GRB2 @ 21 (4.184991908), CDK1 @ 36 (3.960479767), PIK3R2 @ 57 (3.849769814), SRC @ 72 (3.815262485), PLCG1 @ 73 (3.813392608), PIK3R3 @ 88 (3.750814494)	ITGAL	2600	2.12133	SRC @ 32 (3.98269232), MYC @ 56 (3.825986802)
FTH1	2672	2.16849	KPNA2 @ 20 (4.185288434), GRB2 @ 21 (4.184991908), YWHAE @ 31 (4.000171791)	AP1M1	2604	2.11964	EGFR @ 8 (4.259252678), NRF1 @ 22 (4.046253517), CLTC @ 98 (3.665966184)
ADAM10	2692	2.16518	GRB2 @ 21 (4.184991908), CDH1 @ 26 (4.048973937), APP @ 91 (3.745785722)	USP14	2613	2.11698	CDK1 @ 18 (4.078436677), RPS27A @ 35 (3.95946954), UBA52 @ 41 (3.930125003), AR @ 64 (3.786837043), AKT1 @ 82 (3.716718023)
TEC	2699	2.16383	GRB2 @ 21 (4.184991908), TP53 @ 29 (4.011818792), PIK3R2 @ 57 (3.849769814), ERBB2 @ 67 (3.830356053), PLCG1 @ 73 (3.813392608), PIK3R3 @ 88 (3.750814494), SHC1 @ 89 (3.749321692), PLCG2 @ 98 (3.731445794)	PPIA	2622	2.1142	ELAVL1 @ 12 (4.178507033), APP @ 20 (4.06357256), NRF1 @ 22 (4.046253517), H2AX @ 33 (3.978872976), JUN @ 42 (3.928420791), GRB2 @ 65 (3.770730971), HSP90AB1 @ 77 (3.725182879), NPM1 @ 79 (3.723229211), AKT1 @ 82 (3.716718023), HSP90AA1 @ 87 (3.706481498), CDK2 @ 89 (3.699623682), POU5F1 @ 90 (3.694597021), ESR1 @ 95 (3.677494751)
CEACAM1	2709	2.16141	INSR @ 10 (4.567054143), EGFR @ 18 (4.255273461), SRC @ 72 (3.815262485), SHC1 @ 89 (3.749321692)	CAPN1	2624	2.11414	TP53 @ 7 (4.263878027), RELA @ 55 (3.832644555), STAT3 @ 75 (3.739433125)
C1R	2712	2.16078	EP300 @ 44 (3.908165976)	RIPK2	2642	2.1082	NRF1 @ 22 (4.046253517), NFKB1 @ 24 (4.021122149), TRAF6 @ 60 (3.802540496), HSP90AB1 @ 77 (3.725182879), HSP90AA1 @ 87 (3.706481498)
PRKCQ	2718	2.15912	RUNX1 @ 19 (4.230547681), KRAS @ 43 (3.922588159), HSP90AB1 @ 47 (3.89559168), PLCG1 @ 73 (3.813392608)	PSMA4	2645	2.10741	NRF1 @ 22 (4.046253517), NFKB1 @ 24 (4.021122149), HDAC2 @ 31 (3.989763953), RPS27A @ 35 (3.95946954), UBA52 @ 41 (3.930125003), JUN @ 42 (3.928420791), MYC @ 56 (3.825986802), TRAF6 @ 60 (3.802540496), SIRT1 @ 61 (3.802094612)
CAMP	2724	2.15718	IGF1R @ 23 (4.061111546)	CARD9	2650	2.10584	RAD50 @ 19 (4.067545896), YWHAB @ 93 (3.686814642)
ATG12	2729	2.15476	APP @ 91 (3.745785722)	PSME1	2668	2.09995	APP @ 20 (4.06357256), IRF1 @ 39 (3.937384347), UBA52 @ 41 (3.930125003), GRB2 @ 65 (3.770730971)
PSMD3	2739	2.15301	CDK2 @ 3 (4.692024128), GRK2 @ 45 (3.906377942), UBA52 @ 58 (3.849143067), RPS27A @ 64 (3.841632945), PLCG2 @ 98 (3.731445794)	CCL22	2678	2.09755	STAT3 @ 75 (3.739433125)
MAP3K14	2756	2.14739	EGFR @ 18 (4.255273461), HSP90AB1 @ 47 (3.89559168), NPM1 @ 70 (3.818434018)	PSME2	2690	2.09287	APP @ 20 (4.06357256), IRF1 @ 39 (3.937384347)
UBE2D3	2770	2.14361	TP53 @ 29 (4.011818792), UBA52 @ 58 (3.849143067), RPS27A @ 64 (3.841632945)	PRKCQ	2704	2.08918	NFKB1 @ 24 (4.021122149), RELA @ 55 (3.832644555), TRAF6 @ 60 (3.802540496), RUNX1 @ 71 (3.759465655), HSP90AB1 @ 77 (3.725182879), AKT1 @ 82 (3.716718023)
TAB2	2796	2.13656	YWHAE @ 31 (4.000171791), SIN3A @ 33 (3.966211795), UBA52 @ 58 (3.849143067), RPS27A @ 64 (3.841632945), CLTC @ 68 (3.829350917), NPM1 @ 70 (3.818434018), ERBB4 @ 84 (3.769879596), APP @ 91 (3.745785722)	PTPRJ	2706	2.08875	EGFR @ 8 (4.259252678), CTNNB1 @ 23 (4.032609254), SRC @ 32 (3.98269232), ERBB2 @ 53 (3.843354357), GRB2 @ 65 (3.770730971)
AP2A2	2807	2.13249	EGFR @ 18 (4.255273461), GRB2 @ 21 (4.184991908), TERF2 @ 48 (3.885006348), CLTC @ 68 (3.829350917), SHC1 @ 89 (3.749321692), APP @ 91 (3.745785722)	NLRP3	2738	2.08089	NFKB1 @ 24 (4.021122149), RELA @ 55 (3.832644555), HSP90AB1 @ 77 (3.725182879), HSP90AA1 @ 87 (3.706481498)
PSMD8	2808	2.1323	CDK2 @ 3 (4.692024128), UBA52 @ 58 (3.849143067), RPS27A @ 64 (3.841632945)	TANK	2743	2.07996	KPNA2 @ 16 (4.098579501), APP @ 20 (4.06357256), TRAF6 @ 60 (3.802540496), CLTC @ 98 (3.665966184)
IMPDH2	2813	2.13146	CDK2 @ 3 (4.692024128), GRB2 @ 21 (4.184991908), NPM1 @ 70 (3.818434018)	PSMB1	2753	2.07639	RPS27A @ 35 (3.95946954), UBA52 @ 41 (3.930125003), JUN @ 42 (3.928420791), MYC @ 56 (3.825986802)
SNAP25	2827	2.12762	EGFR @ 18 (4.255273461), APP @ 91 (3.745785722)	PSMA5	2757	2.0754	APP @ 20 (4.06357256), FOXP3 @ 34 (3.966832631), RPS27A @ 35 (3.95946954), UBA52 @ 41 (3.930125003), MYC @ 56 (3.825986802), SIRT1 @ 61 (3.802094612), CDK2 @ 89 (3.699623682)
HMOX1	2845	2.12431	TERF1 @ 65 (3.835912394), STAT3 @ 92 (3.744179493)	NOS3	2760	2.07452	ELAVL1 @ 12 (4.178507033), APP @ 20 (4.06357256), CTNNB1 @ 23 (4.032609254), SIRT1 @ 61 (3.802094612), PRKACA @ 69 (3.762362936), HSP90AB1 @ 77 (3.725182879), AKT1 @ 82 (3.716718023), HSP90AA1 @ 87 (3.706481498), ESR1 @ 95 (3.677494751)
MAVS	2850	2.1229	HSP90AB1 @ 47 (3.89559168), UBA52 @ 58 (3.849143067), RPS27A @ 64 (3.841632945), SRC @ 72 (3.815262485)	CTSB	2766	2.07348	APP @ 20 (4.06357256)
MEF2C	2868	2.11806	CDK1 @ 36 (3.960479767), CTNNB1 @ 42 (3.926547961), EP300 @ 44 (3.908165976)	NOS2	2771	2.07236	SRC @ 32 (3.98269232), YWHAE @ 37 (3.946570154), STAT1 @ 72 (3.759329862), STAT3 @ 75 (3.739433125), HSP90AB1 @ 77 (3.725182879), NPM1 @ 79 (3.723229211), AKT1 @ 82 (3.716718023), HSP90AA1 @ 87 (3.706481498)
PSMD1	2871	2.11706	HSP90AB1 @ 47 (3.89559168), UBA52 @ 58 (3.849143067), RPS27A @ 64 (3.841632945), NPM1 @ 70 (3.818434018)	MME	2774	2.07157	APP @ 20 (4.06357256), NPPA @ 97 (3.66898913)
CDK13	2884	2.11455	CDK2 @ 3 (4.692024128), CDK1 @ 36 (3.960479767), TERF2 @ 48 (3.885006348), TERF1 @ 65 (3.835912394)	PNP	2777	2.07088	TP53 @ 7 (4.263878027), OGG1 @ 36 (3.948787199), SIRT1 @ 61 (3.802094612), CDK2 @ 89 (3.699623682)
ELMO1	2891	2.11281	SRC @ 72 (3.815262485)	PSMB2	2787	2.06936	RPS27A @ 35 (3.95946954), UBA52 @ 41 (3.930125003), TRAF6 @ 60 (3.802540496)
PSMA7	2904	2.10967	EGFR @ 18 (4.255273461), HSP90AB1 @ 47 (3.89559168), UBA52 @ 58 (3.849143067), RPS27A @ 64 (3.841632945), TERF1 @ 65 (3.835912394), APP @ 91 (3.745785722)	UBA3	2791	2.06846	UBA52 @ 41 (3.930125003)
PSMC1	2911	2.1086	TP53 @ 29 (4.011818792), GRK2 @ 45 (3.906377942), UBA52 @ 58 (3.849143067), RPS27A @ 64 (3.841632945), APP @ 91 (3.745785722)	CAT	2806	2.06244	APP @ 20 (4.06357256), NFKB1 @ 24 (4.021122149), SMARCA4 @ 27 (4.004652833), GRB2 @ 65 (3.770730971), KEAP1 @ 83 (3.711971154)
IFNA2	2913	2.1084	EGFR @ 18 (4.255273461)	PSTPIP1	2820	2.05777	RPS26 @ 4 (4.467848456)
TRAF3	2915	2.10747	HRAS @ 55 (3.85675947), UBA52 @ 58 (3.849143067), RPS27A @ 64 (3.841632945), SRC @ 72 (3.815262485)	RAB10	2827	2.05666	ELAVL1 @ 12 (4.178507033), APP @ 20 (4.06357256), NRF1 @ 22 (4.046253517), JUN @ 42 (3.928420791), TRAF6 @ 60 (3.802540496)
NME2	2920	2.10658	CTBP1 @ 34 (3.965358784), CDK1 @ 36 (3.960479767), TERF1 @ 65 (3.835912394)	PYCARD	2846	2.04812	LIG3 @ 13 (4.116238444)
DCD	2923	2.1058	CDK2 @ 3 (4.692024128), GRK2 @ 45 (3.906377942)	ITGAX	2859	2.04426	SRC @ 32 (3.98269232), STAT1 @ 72 (3.759329862), STAT3 @ 75 (3.739433125)
PAK2	2947	2.10118	GRB2 @ 21 (4.184991908), YWHAE @ 31 (4.000171791), EP300 @ 44 (3.908165976), SRC @ 72 (3.815262485), YWHAB @ 75 (3.807771122), APP @ 91 (3.745785722)	RPS6KA3	2870	2.04049	TP53 @ 7 (4.263878027), SRC @ 32 (3.98269232), H2AX @ 33 (3.978872976), STAT3 @ 75 (3.739433125), HSP90AB1 @ 77 (3.725182879), HSP90AA1 @ 87 (3.706481498), H3-4 @ 88 (3.699941274), ESR1 @ 95 (3.677494751)
IFNB1	2949	2.10091	EGFR @ 18 (4.255273461)	PSMD7	2873	2.03981	RPS27A @ 35 (3.95946954), UBA52 @ 41 (3.930125003), JUN @ 42 (3.928420791), TRAF6 @ 60 (3.802540496)
PSEN1	2954	2.09951	GRB2 @ 21 (4.184991908), CDH1 @ 26 (4.048973937), CTNNB1 @ 42 (3.926547961), ERBB4 @ 84 (3.769879596), APP @ 91 (3.745785722)	TOM1	2877	2.03882	YAP1 @ 15 (4.103703234), APP @ 20 (4.06357256), RPS27A @ 35 (3.95946954), UBA52 @ 41 (3.930125003), CLTC @ 98 (3.665966184)
PPP2R5D	2969	2.09634	YWHAB @ 75 (3.807771122)	CASP2	2884	2.0368	ELAVL1 @ 12 (4.178507033), KPNA2 @ 16 (4.098579501), NRF1 @ 22 (4.046253517), MDM2 @ 47 (3.863162591), GRB2 @ 65 (3.770730971)
PSMD7	2995	2.08944	TST @ 52 (3.866256659), UBA52 @ 58 (3.849143067), RPS27A @ 64 (3.841632945)	TRIM25	2885	2.0357	TP53 @ 7 (4.263878027), RPS27A @ 35 (3.95946954), UBA52 @ 41 (3.930125003), JUN @ 42 (3.928420791), EZH2 @ 49 (3.859099803), TRAF6 @ 60 (3.802540496), STAT1 @ 72 (3.759329862), ESR1 @ 95 (3.677494751)
MNDA	3000	2.08816	CDK2 @ 3 (4.692024128), TP53 @ 29 (4.011818792), CDK1 @ 36 (3.960479767), STAT3 @ 92 (3.744179493)	PSMB3	2902	2.03116	TP53 @ 7 (4.263878027), H2AX @ 33 (3.978872976), RPS27A @ 35 (3.95946954), UBA52 @ 41 (3.930125003), JUN @ 42 (3.928420791), MYC @ 56 (3.825986802), TRAF6 @ 60 (3.802540496)
COPB1	3008	2.08548	CDK2 @ 3 (4.692024128), GRB2 @ 21 (4.184991908), NPM1 @ 70 (3.818434018), APP @ 91 (3.745785722)	IGF2R	2918	2.02681	TRAF6 @ 60 (3.802540496)
PSMA2	3023	2.08231	HSP90AB1 @ 47 (3.89559168), UBA52 @ 58 (3.849143067), RPS27A @ 64 (3.841632945), TERF1 @ 65 (3.835912394)	PSMD12	2940	2.01976	RPS27A @ 35 (3.95946954), UBA52 @ 41 (3.930125003), JUN @ 42 (3.928420791), TRAF6 @ 60 (3.802540496), NPM1 @ 79 (3.723229211)
S100B	3037	2.0786	TP53 @ 29 (4.011818792), APP @ 91 (3.745785722)	RPS6KA5	2954	2.01533	EP300 @ 3 (4.566455535), H3C13 @ 28 (3.995298939), H3C12 @ 30 (3.990523587), EZH2 @ 49 (3.859099803), H3-3B @ 54 (3.833825465), RELA @ 55 (3.832644555), PRKACA @ 69 (3.762362936), STAT1 @ 72 (3.759329862), STAT3 @ 75 (3.739433125), HSP90AB1 @ 77 (3.725182879), H3-4 @ 88 (3.699941274)
CXCR2	3045	2.07774	GRK2 @ 45 (3.906377942), SRC @ 72 (3.815262485), GNB1 @ 80 (3.788808915), GNG2 @ 86 (3.766846214)	PSMD1	2959	2.0143	RPS27A @ 35 (3.95946954), UBA52 @ 41 (3.930125003), JUN @ 42 (3.928420791), MDM2 @ 47 (3.863162591), TRAF6 @ 60 (3.802540496), SIRT1 @ 61 (3.802094612), HSP90AB1 @ 77 (3.725182879), NPM1 @ 79 (3.723229211), HSP90AA1 @ 87 (3.706481498), ESR1 @ 95 (3.677494751)
HLA-C	3068	2.07102	CLTC @ 68 (3.829350917)	PSMA2	2968	2.01114	NRF1 @ 22 (4.046253517), RPS27A @ 35 (3.95946954), UBA52 @ 41 (3.930125003), JUN @ 42 (3.928420791), MYC @ 56 (3.825986802), TRAF6 @ 60 (3.802540496), SIRT1 @ 61 (3.802094612), HSP90AB1 @ 77 (3.725182879)
NCF1	3074	2.07027	SRC @ 72 (3.815262485)	ABI2	2991	2.007	BMPR1B @ 76 (3.725317326), AKT1 @ 82 (3.716718023)
PPP3R1	3076	2.07022	PLCG1 @ 73 (3.813392608), PLCG2 @ 98 (3.731445794)	NOD2	2995	2.00398	NFKB1 @ 24 (4.021122149), TRAF6 @ 60 (3.802540496)
HSPA1B	3094	2.0666	EGFR @ 18 (4.255273461), TP53 @ 29 (4.011818792), HSP90AB1 @ 47 (3.89559168), YWHAB @ 75 (3.807771122)	PSMC6	2997	2.00293	RPS27A @ 35 (3.95946954), UBA52 @ 41 (3.930125003), JUN @ 42 (3.928420791), MDM2 @ 47 (3.863162591), MYC @ 56 (3.825986802), TRAF6 @ 60 (3.802540496), CDK2 @ 89 (3.699623682)
UBA3	3096	2.06632	PAPSS1 @ 54 (3.85901715), UBA52 @ 58 (3.849143067)	HSPA1B	3010	1.99994	TP53 @ 7 (4.263878027), EGFR @ 8 (4.259252678), EZH2 @ 49 (3.859099803), SIRT1 @ 61 (3.802094612), AR @ 64 (3.786837043), PRKACA @ 69 (3.762362936), HSP90AB1 @ 77 (3.725182879), HSP90AA1 @ 87 (3.706481498), YWHAB @ 93 (3.686814642)
SEM1	3098	2.06595	SIN3A @ 33 (3.966211795), RPS27A @ 64 (3.841632945)	AP2A2	3089	1.97472	EGFR @ 8 (4.259252678), APP @ 20 (4.06357256), GRB2 @ 65 (3.770730971), CLTC @ 98 (3.665966184)
IDH1	3138	2.05659	CDK2 @ 3 (4.692024128), TP53 @ 29 (4.011818792)	RAB9B	3105	1.96931	NRF1 @ 22 (4.046253517)
CYB5R3	3141	2.05582	CDK2 @ 3 (4.692024128), CYCS @ 81 (3.787614979)	PSMC4	3106	1.96893	NRF1 @ 22 (4.046253517), RPS27A @ 35 (3.95946954), UBA52 @ 41 (3.930125003), JUN @ 42 (3.928420791), MYC @ 56 (3.825986802), TRAF6 @ 60 (3.802540496), NPM1 @ 79 (3.723229211), ESR1 @ 95 (3.677494751)
FCGR1A	3151	2.05457	SRC @ 72 (3.815262485), SHC1 @ 89 (3.749321692), INS @ 94 (3.741981928)	CGAS	3107	1.96879	ELAVL1 @ 12 (4.178507033), BRCA1 @ 14 (4.109727894), H3C13 @ 28 (3.995298939), H3C12 @ 30 (3.990523587), H4C6 @ 52 (3.853376106)
PSMD12	3153	2.05435	UBA52 @ 58 (3.849143067), RPS27A @ 64 (3.841632945), NPM1 @ 70 (3.818434018)	GAB2	3115	1.96574	EGFR @ 8 (4.259252678), SRC @ 32 (3.98269232), YWHAE @ 37 (3.946570154), ERBB2 @ 53 (3.843354357), TRAF6 @ 60 (3.802540496), GRB2 @ 65 (3.770730971), AKT1 @ 82 (3.716718023), YWHAB @ 93 (3.686814642)
RASGRP2	3162	2.05221	NRAS @ 41 (3.934319021), KRAS @ 43 (3.922588159), HRAS @ 55 (3.85675947), APP @ 91 (3.745785722)	MOSPD2	3119	1.96553	ELAVL1 @ 12 (4.178507033)
POLR3E	3168	2.05116	TBP @ 13 (4.487899762)	S100A8	3126	1.96315	TP53 @ 7 (4.263878027), APP @ 20 (4.06357256), CDK9 @ 40 (3.936164117), CDH1 @ 48 (3.861344958), GRB2 @ 65 (3.770730971), CDK2 @ 89 (3.699623682), ESR1 @ 95 (3.677494751)
PSMC4	3205	2.04309	GRK2 @ 45 (3.906377942), UBA52 @ 58 (3.849143067), RPS27A @ 64 (3.841632945), NPM1 @ 70 (3.818434018)	ARMC8	3145	1.95786	EGFR @ 8 (4.259252678), CTNNB1 @ 23 (4.032609254), SOX2 @ 70 (3.761055665)
CR2	3208	2.04183	TP53 @ 29 (4.011818792)	POLR1D	3170	1.94955	GRB2 @ 65 (3.770730971)
POLR1D	3209	2.04181	TBP @ 13 (4.487899762), GRB2 @ 21 (4.184991908)	PSMB5	3178	1.94648	RPS27A @ 35 (3.95946954), UBA52 @ 41 (3.930125003), JUN @ 42 (3.928420791), MYC @ 56 (3.825986802), TRAF6 @ 60 (3.802540496), HSP90AB1 @ 77 (3.725182879), HSP90AA1 @ 87 (3.706481498)
IFNA5	3212	2.04122	EGFR @ 18 (4.255273461), APP @ 91 (3.745785722)	LAT	3184	1.94486	EGFR @ 8 (4.259252678), TRAF6 @ 60 (3.802540496), GRB2 @ 65 (3.770730971)
PSMB6	3221	2.03932	CDK2 @ 3 (4.692024128), UBA52 @ 58 (3.849143067), RPS27A @ 64 (3.841632945)	PSMD6	3201	1.94009	TP53 @ 7 (4.263878027), RPS27A @ 35 (3.95946954), UBA52 @ 41 (3.930125003), JUN @ 42 (3.928420791), TRAF6 @ 60 (3.802540496)
IFNA10	3229	2.0372	EGFR @ 18 (4.255273461)	MAP3K14	3232	1.93049	EGFR @ 8 (4.259252678), NRF1 @ 22 (4.046253517), RELA @ 55 (3.832644555), TRAF6 @ 60 (3.802540496), HSP90AB1 @ 77 (3.725182879), NPM1 @ 79 (3.723229211), HSP90AA1 @ 87 (3.706481498)
IFNA4	3232	2.03651	EGFR @ 18 (4.255273461)	UBE2V1	3235	1.92929	NRF1 @ 22 (4.046253517), RPS27A @ 35 (3.95946954), UBA52 @ 41 (3.930125003), TRAF6 @ 60 (3.802540496)
PAFAH1B2	3236	2.03571	CDK2 @ 3 (4.692024128), YWHAE @ 31 (4.000171791), YWHAB @ 75 (3.807771122), STAT3 @ 92 (3.744179493)	PPIE	3302	1.91018	H3C13 @ 28 (3.995298939), H3C12 @ 30 (3.990523587), H3-3B @ 54 (3.833825465), H3-4 @ 88 (3.699941274)
IFNA21	3241	2.03454	EGFR @ 18 (4.255273461)	KRT1	3312	1.9086	EGFR @ 8 (4.259252678), CDH1 @ 48 (3.861344958), GRB2 @ 65 (3.770730971), POU5F1 @ 90 (3.694597021), ESR1 @ 95 (3.677494751)
IFNA7	3248	2.03273	EGFR @ 18 (4.255273461)	FCGR1A	3315	1.90702	SRC @ 32 (3.98269232), STAT1 @ 72 (3.759329862)
NLRC4	3259	2.03048	TP53 @ 29 (4.011818792)	TYROBP	3327	1.90277	GRB2 @ 65 (3.770730971)
IFNA8	3280	2.02691	EGFR @ 18 (4.255273461), APP @ 91 (3.745785722)	BCL10	3331	1.90204	ELAVL1 @ 12 (4.178507033), NRF1 @ 22 (4.046253517), NFKB1 @ 24 (4.021122149), RPS27A @ 35 (3.95946954), CDK9 @ 40 (3.936164117), RELA @ 55 (3.832644555), ATM @ 59 (3.803938404), TRAF6 @ 60 (3.802540496), AKT1 @ 82 (3.716718023)
DBNL	3285	2.02642	CDK2 @ 3 (4.692024128), TERF1 @ 65 (3.835912394)	PSMD3	3339	1.89925	RPS27A @ 35 (3.95946954), CDK9 @ 40 (3.936164117), UBA52 @ 41 (3.930125003), JUN @ 42 (3.928420791), MYC @ 56 (3.825986802), TRAF6 @ 60 (3.802540496), CDK2 @ 89 (3.699623682)
IFNA14	3287	2.02598	EGFR @ 18 (4.255273461)	MAP2K3	3380	1.88524	TP53 @ 7 (4.263878027), APP @ 20 (4.06357256), MYC @ 56 (3.825986802), TRAF6 @ 60 (3.802540496), AKT1 @ 82 (3.716718023)
PSMA4	3288	2.02588	IKZF1 @ 28 (4.018602888), UBA52 @ 58 (3.849143067), RPS27A @ 64 (3.841632945)	IRAK4	3398	1.88014	NRF1 @ 22 (4.046253517), NFKB1 @ 24 (4.021122149), TRAF6 @ 60 (3.802540496)
NCSTN	3303	2.0221	CDH1 @ 26 (4.048973937), APP @ 91 (3.745785722), SQOR @ 93 (3.74216698)	PAFAH1B2	3402	1.8798	YWHAE @ 37 (3.946570154), TRAF6 @ 60 (3.802540496), STAT3 @ 75 (3.739433125), CDK2 @ 89 (3.699623682), YWHAB @ 93 (3.686814642)
CR1	3317	2.01725	RUNX1 @ 19 (4.230547681)	ATP6V1A	3404	1.87911	ELAVL1 @ 12 (4.178507033), JUN @ 42 (3.928420791), RAB35 @ 44 (3.880783612), RAB7A @ 91 (3.694059873)
CYFIP1	3323	2.01517	TERF2 @ 48 (3.885006348), TERF1 @ 65 (3.835912394), GNB1 @ 80 (3.788808915)	TNFAIP3	3432	1.8732	TP53 @ 7 (4.263878027), NFKB1 @ 24 (4.021122149), RPS27A @ 35 (3.95946954), YWHAE @ 37 (3.946570154), UBA52 @ 41 (3.930125003), TRAF6 @ 60 (3.802540496), HSP90AB1 @ 77 (3.725182879), HSP90AA1 @ 87 (3.706481498), YWHAB @ 93 (3.686814642)
TNFRSF1B	3337	2.01148	CLTC @ 68 (3.829350917)	DNM1	3434	1.87289	APP @ 20 (4.06357256), SRC @ 32 (3.98269232), GRB2 @ 65 (3.770730971), CLTC @ 98 (3.665966184)
PGRMC1	3344	2.00999	CDK2 @ 3 (4.692024128), EGFR @ 18 (4.255273461)	TTR	3446	1.87134	APP @ 20 (4.06357256)
HMOX2	3348	2.00921	SHC1 @ 89 (3.749321692), APP @ 91 (3.745785722)	CD36	3468	1.86443	APP @ 20 (4.06357256), SRC @ 32 (3.98269232)
DNM1	3359	2.00729	GRB2 @ 21 (4.184991908), CLTC @ 68 (3.829350917), SRC @ 72 (3.815262485), PLCG1 @ 73 (3.813392608), APP @ 91 (3.745785722)	MALT1	3483	1.86138	NFKB1 @ 24 (4.021122149), RELA @ 55 (3.832644555), TRAF6 @ 60 (3.802540496)
NCF2	3362	2.00661	GNB1 @ 80 (3.788808915)	DNAJC3	3504	1.85544	NRF1 @ 22 (4.046253517)
GPI	3379	2.00341	CDK2 @ 3 (4.692024128)	RHOG	3515	1.8513	AKT1 @ 82 (3.716718023), RAB7A @ 91 (3.694059873)
ITGAL	3384	2.00239	SRC @ 72 (3.815262485)	NME2	3544	1.84344	CDK1 @ 18 (4.078436677), MDM2 @ 47 (3.863162591), ESR1 @ 95 (3.677494751)
CTSD	3428	1.98927	APP @ 91 (3.745785722), INS @ 94 (3.741981928)	GSN	3553	1.84159	EGFR @ 8 (4.259252678), APP @ 20 (4.06357256), SRC @ 32 (3.98269232), MDM2 @ 47 (3.863162591), AR @ 64 (3.786837043), GRB2 @ 65 (3.770730971), ESR1 @ 95 (3.677494751)
PRDX6	3438	1.9876	CDK2 @ 3 (4.692024128), YWHAE @ 31 (4.000171791), TERF1 @ 65 (3.835912394), NPM1 @ 70 (3.818434018)	CAMP	3564	1.83871	NFKB1 @ 24 (4.021122149), JUN @ 42 (3.928420791), RELA @ 55 (3.832644555)
ITGAX	3439	1.98736	SRC @ 72 (3.815262485), STAT3 @ 92 (3.744179493)	NCF1	3586	1.83121	NFKB1 @ 24 (4.021122149), SRC @ 32 (3.98269232), RELA @ 55 (3.832644555), PRKACA @ 69 (3.762362936), AKT1 @ 82 (3.716718023)
RAB14	3442	1.98695	APP @ 91 (3.745785722)	PSMB4	3616	1.82288	APP @ 20 (4.06357256), H2AX @ 33 (3.978872976), FOXP3 @ 34 (3.966832631), RPS27A @ 35 (3.95946954), UBA52 @ 41 (3.930125003), JUN @ 42 (3.928420791), MYC @ 56 (3.825986802), TRAF6 @ 60 (3.802540496), AKT1 @ 82 (3.716718023)
IGF2R	3459	1.98358	IGF1R @ 23 (4.061111546)	HMOX1	3630	1.81845	ELAVL1 @ 12 (4.178507033), STAT3 @ 75 (3.739433125), AKT1 @ 82 (3.716718023)
POLR3F	3462	1.983	TBP @ 13 (4.487899762)	DNAJC5	3639	1.81725	NRF1 @ 22 (4.046253517), PRKACA @ 69 (3.762362936), HSP90AB1 @ 77 (3.725182879), HSP90AA1 @ 87 (3.706481498)
IFNA17	3467	1.98248	EGFR @ 18 (4.255273461)	PSMD8	3642	1.8166	RPS27A @ 35 (3.95946954), UBA52 @ 41 (3.930125003), JUN @ 42 (3.928420791), TRAF6 @ 60 (3.802540496), TP53BP1 @ 78 (3.725074195), CDK2 @ 89 (3.699623682)
TAB1	3478	1.98122	EGFR @ 18 (4.255273461), GRB2 @ 21 (4.184991908), HSP90AB1 @ 47 (3.89559168), NPM1 @ 70 (3.818434018)	MNDA	3660	1.81187	TP53 @ 7 (4.263878027), CDK1 @ 18 (4.078436677), H2AX @ 33 (3.978872976), STAT3 @ 75 (3.739433125), CDK2 @ 89 (3.699623682), LARP7 @ 96 (3.6762156)
HRNR	3491	1.97757	CDK2 @ 3 (4.692024128), GRK2 @ 45 (3.906377942)	UBE2L6	3666	1.81124	RPS27A @ 35 (3.95946954), UBA52 @ 41 (3.930125003), RUNX1 @ 71 (3.759465655), STAT1 @ 72 (3.759329862)
CFH	3501	1.97522	GRB2 @ 21 (4.184991908), EP300 @ 44 (3.908165976)	PRDX4	3690	1.80636	EP300 @ 3 (4.566455535), H2AX @ 33 (3.978872976), JUN @ 42 (3.928420791), NPM1 @ 79 (3.723229211)
ACTR2	3518	1.97166	GRB2 @ 21 (4.184991908)	TNFRSF1B	3719	1.80049	TRAF6 @ 60 (3.802540496), STAT1 @ 72 (3.759329862), CLTC @ 98 (3.665966184)
DNAJC5	3519	1.97159	HSP90AB1 @ 47 (3.89559168)	IGKV2D-28	3725	1.79918	EGFR @ 8 (4.259252678)
LIMK1	3535	1.96771	HSP90AB1 @ 47 (3.89559168), NRG1 @ 59 (3.848289148), APP @ 91 (3.745785722)	UBE2K	3737	1.79567	TP53 @ 7 (4.263878027), BRCA1 @ 14 (4.109727894), NRF1 @ 22 (4.046253517), NFKB1 @ 24 (4.021122149), RPS27A @ 35 (3.95946954), UBA52 @ 41 (3.930125003), MDM2 @ 47 (3.863162591), CLTC @ 98 (3.665966184)
PSMB2	3550	1.96417	TST @ 52 (3.866256659), HRAS @ 55 (3.85675947), UBA52 @ 58 (3.849143067), RPS27A @ 64 (3.841632945)	ALDOA	3748	1.7933	EGFR @ 8 (4.259252678), NRF1 @ 22 (4.046253517), H2AX @ 33 (3.978872976), JUN @ 42 (3.928420791), HSP90AB1 @ 77 (3.725182879), AKT1 @ 82 (3.716718023), HSP90AA1 @ 87 (3.706481498), CDK2 @ 89 (3.699623682)
BIRC3	3562	1.96055	EGFR @ 18 (4.255273461), RPS27A @ 64 (3.841632945)	DOCK1	3749	1.79274	SRC @ 32 (3.98269232), GRB2 @ 65 (3.770730971), AKT1 @ 82 (3.716718023)
RPS6KA2	3564	1.96022	CTBP1 @ 34 (3.965358784), NRAS @ 41 (3.934319021), KRAS @ 43 (3.922588159), HSP90AB1 @ 47 (3.89559168), HRAS @ 55 (3.85675947)	CTSD	3759	1.79129	APP @ 20 (4.06357256), NRF1 @ 22 (4.046253517), H2AX @ 33 (3.978872976), CDK9 @ 40 (3.936164117), ESR1 @ 95 (3.677494751)
CD209	3572	1.95893	MUC1 @ 46 (3.897446897)	CD63	3761	1.79111	SRC @ 32 (3.98269232)
MIF	3585	1.95688	CDK2 @ 3 (4.692024128), TP53 @ 29 (4.011818792)	DSN1	3810	1.77877	CDK1 @ 18 (4.078436677), APP @ 20 (4.06357256), NRF1 @ 22 (4.046253517), HSP90AA1 @ 87 (3.706481498)
ORM1	3587	1.95674	PIK3R3 @ 88 (3.750814494)	MEFV	3817	1.77723	YWHAE @ 37 (3.946570154), RELA @ 55 (3.832644555)
HUWE1	3596	1.95513	TP53 @ 29 (4.011818792), CTNNB1 @ 42 (3.926547961), UBA52 @ 58 (3.849143067), RPS27A @ 64 (3.841632945)	COPB1	3826	1.77543	APP @ 20 (4.06357256), JUN @ 42 (3.928420791), EZH2 @ 49 (3.859099803), GRB2 @ 65 (3.770730971), NPM1 @ 79 (3.723229211), XRCC6 @ 80 (3.718531754), CDK2 @ 89 (3.699623682)
TLR9	3610	1.9527	GRB2 @ 21 (4.184991908), HRAS @ 55 (3.85675947), SRC @ 72 (3.815262485)	C1R	3868	1.76327	EP300 @ 3 (4.566455535)
IFNA16	3630	1.94746	EGFR @ 18 (4.255273461), APP @ 91 (3.745785722)	ITPR2	3871	1.76195	PRKACA @ 69 (3.762362936)
SERPINA3	3637	1.94434	ERBB2 @ 67 (3.830356053), APP @ 91 (3.745785722)	CD33	3886	1.75868	SRC @ 32 (3.98269232)
IFNA6	3677	1.93663	EGFR @ 18 (4.255273461)	TLR7	3895	1.75723	NFKB1 @ 24 (4.021122149), TRAF6 @ 60 (3.802540496), STAT1 @ 72 (3.759329862), STAT3 @ 75 (3.739433125)
PAK3	3689	1.93429	CDK2 @ 3 (4.692024128)	GRN	3905	1.75388	CDK9 @ 40 (3.936164117), NPM1 @ 79 (3.723229211), CDK2 @ 89 (3.699623682)
PYGB	3708	1.92957	INSR @ 10 (4.567054143), NPM1 @ 70 (3.818434018), PLCG1 @ 73 (3.813392608)	IFNA13	3908	1.75215	EGFR @ 8 (4.259252678), NFKB1 @ 24 (4.021122149)
CD33	3710	1.9294	SRC @ 72 (3.815262485), PLCG1 @ 73 (3.813392608)	ABI1	3931	1.74908	CDK1 @ 18 (4.078436677), NRF1 @ 22 (4.046253517), SRC @ 32 (3.98269232), GRB2 @ 65 (3.770730971)
POLR3D	3713	1.92801	TBP @ 13 (4.487899762)	PCBP2	3947	1.74441	ELAVL1 @ 12 (4.178507033), BRCA1 @ 14 (4.109727894), NRF1 @ 22 (4.046253517), NFKB1 @ 24 (4.021122149), H2AX @ 33 (3.978872976), CDK9 @ 40 (3.936164117), JUN @ 42 (3.928420791), MYC @ 56 (3.825986802), AKT1 @ 82 (3.716718023), CDK2 @ 89 (3.699623682)
CTSL	3717	1.92748	GCG @ 85 (3.767022136)	CD19	3972	1.73844	GRB2 @ 65 (3.770730971)
CAPZA1	3741	1.92236	YWHAB @ 75 (3.807771122)	LAMP1	3977	1.73741	EGFR @ 8 (4.259252678), ELAVL1 @ 12 (4.178507033), RAB7A @ 91 (3.694059873)
ARPC2	3749	1.91977	CDK2 @ 3 (4.692024128), GRB2 @ 21 (4.184991908), CDH1 @ 26 (4.048973937)	RPS6KA2	3978	1.7371	JUN @ 42 (3.928420791), MDM2 @ 47 (3.863162591), RELA @ 55 (3.832644555), SOX2 @ 70 (3.761055665), HSP90AB1 @ 77 (3.725182879), HSP90AA1 @ 87 (3.706481498)
PSMC3	3752	1.91913	TP53 @ 29 (4.011818792), UBA52 @ 58 (3.849143067), RPS27A @ 64 (3.841632945)	CARD11	3991	1.73349	NFKB1 @ 24 (4.021122149), RELA @ 55 (3.832644555), TRAF6 @ 60 (3.802540496), AKT1 @ 82 (3.716718023)
ATF1	3761	1.91488	EP300 @ 44 (3.908165976)	C4A	4040	1.72375	MYC @ 56 (3.825986802)
PSMB4	3768	1.91363	FOXP3 @ 40 (3.94032475), UBA52 @ 58 (3.849143067), RPS27A @ 64 (3.841632945), APP @ 91 (3.745785722)	AGER	4042	1.72342	APP @ 20 (4.06357256), NFKB1 @ 24 (4.021122149), GRB2 @ 65 (3.770730971)
ATP6V1A	3776	1.91202	RAB35 @ 17 (4.272343404), GNB1 @ 80 (3.788808915)	PLD2	4046	1.72292	EGFR @ 8 (4.259252678), SRC @ 32 (3.98269232), GRB2 @ 65 (3.770730971)
ROCK1	3808	1.90476	CTNNB1 @ 42 (3.926547961), HSP90AB1 @ 47 (3.89559168)	ATP6V1B2	4050	1.72228	JUN @ 42 (3.928420791), HSP90AB1 @ 77 (3.725182879), XRCC6 @ 80 (3.718531754), RAB7A @ 91 (3.694059873), CLTC @ 98 (3.665966184)
S100A9	3812	1.90439	EGFR @ 18 (4.255273461), GRB2 @ 21 (4.184991908), SHC1 @ 89 (3.749321692)	RAB14	4059	1.72106	APP @ 20 (4.06357256), NRF1 @ 22 (4.046253517)
FPR1	3838	1.89949	GNAS @ 27 (4.026244404), GRK2 @ 45 (3.906377942), GNB1 @ 80 (3.788808915), GNG2 @ 86 (3.766846214)	ACTR3	4086	1.71421	CDH1 @ 48 (3.861344958), TRAF6 @ 60 (3.802540496), GRB2 @ 65 (3.770730971), ESR1 @ 95 (3.677494751)
APRT	3841	1.89881	APP @ 91 (3.745785722)	FAF2	4089	1.71259	ELAVL1 @ 12 (4.178507033), MYC @ 56 (3.825986802)
TRIM25	3843	1.89825	IGF1R @ 23 (4.061111546), TP53 @ 29 (4.011818792), UBA52 @ 58 (3.849143067), RPS27A @ 64 (3.841632945)	TAB3	4112	1.70545	RPS27A @ 35 (3.95946954), TRAF6 @ 60 (3.802540496)
GSN	3846	1.89772	EGFR @ 18 (4.255273461), GRB2 @ 21 (4.184991908), PIK3CA @ 49 (3.87790566), SRC @ 72 (3.815262485), PLCG1 @ 73 (3.813392608), APP @ 91 (3.745785722)	MYO5A	4118	1.70442	MYC @ 56 (3.825986802)
FABP5	3869	1.89213	CDK2 @ 3 (4.692024128), EGFR @ 18 (4.255273461)	ICAM3	4133	1.70056	APP @ 20 (4.06357256), ZBTB16 @ 38 (3.943619187)
PSMB5	3873	1.89127	HSP90AB1 @ 47 (3.89559168), UBA52 @ 58 (3.849143067), RPS27A @ 64 (3.841632945), TERF1 @ 65 (3.835912394)	YPEL5	4135	1.70046	ELAVL1 @ 12 (4.178507033), SOX2 @ 70 (3.761055665)
BCL10	3888	1.8897	RPS27A @ 64 (3.841632945)	UBA7	4153	1.69658	RPS27A @ 35 (3.95946954), UBA52 @ 41 (3.930125003)
VAT1	3899	1.88774	CDK2 @ 3 (4.692024128), NRAS @ 41 (3.934319021)	POLR3F	4160	1.69527	ELAVL1 @ 12 (4.178507033)
POLR3H	3905	1.88684	TBP @ 13 (4.487899762), YWHAE @ 31 (4.000171791)	WASF1	4164	1.69368	SRC @ 32 (3.98269232), GRB2 @ 65 (3.770730971), PRKACA @ 69 (3.762362936), AKT1 @ 82 (3.716718023)
UBE2V1	3906	1.88663	UBA52 @ 58 (3.849143067), RPS27A @ 64 (3.841632945)	TREM2	4214	1.68216	APP @ 20 (4.06357256)
TYROBP	3916	1.8855	GRB2 @ 21 (4.184991908), PLCG2 @ 98 (3.731445794)	ELK1	4217	1.68105	EP300 @ 3 (4.566455535), ELAVL1 @ 12 (4.178507033), BRCA1 @ 14 (4.109727894), APP @ 20 (4.06357256), HDAC1 @ 45 (3.875037284), GRB2 @ 65 (3.770730971)
PSMB1	3954	1.87777	UBA52 @ 58 (3.849143067), RPS27A @ 64 (3.841632945)	DYNLT1	4233	1.67648	APP @ 20 (4.06357256), NRF1 @ 22 (4.046253517)
ACTR3	3980	1.87215	GRB2 @ 21 (4.184991908), CDH1 @ 26 (4.048973937)	CDC34	4237	1.67599	NRF1 @ 22 (4.046253517), RPS27A @ 35 (3.95946954), CDK9 @ 40 (3.936164117), UBA52 @ 41 (3.930125003), RELA @ 55 (3.832644555)
RPS6KA5	4002	1.86847	EP300 @ 44 (3.908165976), HSP90AB1 @ 47 (3.89559168), STAT3 @ 92 (3.744179493)	APRT	4250	1.67408	APP @ 20 (4.06357256), NRF1 @ 22 (4.046253517), NFKB1 @ 24 (4.021122149), TRAF6 @ 60 (3.802540496)
TNFAIP3	4023	1.86384	TP53 @ 29 (4.011818792), YWHAE @ 31 (4.000171791), HSP90AB1 @ 47 (3.89559168), UBA52 @ 58 (3.849143067), RPS27A @ 64 (3.841632945), YWHAB @ 75 (3.807771122)	ECSIT	4251	1.6738	APP @ 20 (4.06357256), NRF1 @ 22 (4.046253517), NFKB1 @ 24 (4.021122149), RELA @ 55 (3.832644555), MYC @ 56 (3.825986802), TRAF6 @ 60 (3.802540496)
PSMD6	4056	1.8559	TP53 @ 29 (4.011818792), UBA52 @ 58 (3.849143067), RPS27A @ 64 (3.841632945)	MVP	4260	1.67242	KPNA2 @ 16 (4.098579501), HSP90AB1 @ 77 (3.725182879), ESR1 @ 95 (3.677494751), CLTC @ 98 (3.665966184)
LAT2	4062	1.85483	GRB2 @ 21 (4.184991908), PLCG1 @ 73 (3.813392608), SHC1 @ 89 (3.749321692), PLCG2 @ 98 (3.731445794)	ARG1	4266	1.67171	EZH2 @ 49 (3.859099803), MYC @ 56 (3.825986802), ESR1 @ 95 (3.677494751)
ITPR2	4093	1.84795	PLCG1 @ 73 (3.813392608), PLCG2 @ 98 (3.731445794)	ERP44	4296	1.66564	ELAVL1 @ 12 (4.178507033), YAP1 @ 15 (4.103703234), MYC @ 56 (3.825986802)
TBC1D10C	4097	1.84715	RAB35 @ 17 (4.272343404), APP @ 91 (3.745785722)	POLR3K	4298	1.66546	NRF1 @ 22 (4.046253517)
ARPC1B	4102	1.84621	CDK2 @ 3 (4.692024128), APP @ 91 (3.745785722)	MAPK7	4328	1.65907	APP @ 20 (4.06357256), YWHAE @ 37 (3.946570154), CDK9 @ 40 (3.936164117), MYC @ 56 (3.825986802), PRKACA @ 69 (3.762362936), HSP90AB1 @ 77 (3.725182879), YWHAB @ 93 (3.686814642)
MEF2A	4122	1.84103	CTNNB1 @ 42 (3.926547961), EP300 @ 44 (3.908165976)	ATF1	4336	1.65667	EP300 @ 3 (4.566455535), BRCA1 @ 14 (4.109727894), JUN @ 42 (3.928420791), PRKACA @ 69 (3.762362936), ESR1 @ 95 (3.677494751)
DSG1	4160	1.83529	CDK2 @ 3 (4.692024128)	COMMD9	4339	1.65591	NFKB1 @ 24 (4.021122149)
HSPA6	4166	1.83436	HSP90AB1 @ 47 (3.89559168), PIK3R2 @ 57 (3.849769814), TERF1 @ 65 (3.835912394), SHC1 @ 89 (3.749321692)	DDOST	4342	1.65489	JUN @ 42 (3.928420791)
VAPA	4183	1.83057	EGFR @ 18 (4.255273461), ERBB2 @ 67 (3.830356053), APP @ 91 (3.745785722)	NCF2	4350	1.65263	AKT1 @ 82 (3.716718023)
IFNA13	4192	1.82853	EGFR @ 18 (4.255273461)	IFI16	4352	1.65128	TP53 @ 7 (4.263878027), BRCA1 @ 14 (4.109727894), APP @ 20 (4.06357256), TRAF6 @ 60 (3.802540496), AR @ 64 (3.786837043), TP53BP1 @ 78 (3.725074195)
CRCP	4194	1.82841	TBP @ 13 (4.487899762)	MAP2K6	4361	1.64947	RELA @ 55 (3.832644555), TRAF6 @ 60 (3.802540496)
RASGRP4	4195	1.8284	NRAS @ 41 (3.934319021), KRAS @ 43 (3.922588159), HRAS @ 55 (3.85675947)	NCF4	4371	1.64662	XRCC6 @ 80 (3.718531754), AKT1 @ 82 (3.716718023)
TLR3	4197	1.82823	EGFR @ 18 (4.255273461), SRC @ 72 (3.815262485)	PSMB8	4382	1.64446	RPS27A @ 35 (3.95946954), STAT1 @ 72 (3.759329862)
IFIH1	4199	1.82724	UBA52 @ 58 (3.849143067), RPS27A @ 64 (3.841632945), APP @ 91 (3.745785722)	HBB	4385	1.64322	AKT1 @ 82 (3.716718023), CDK2 @ 89 (3.699623682)
CYBA	4200	1.82701	SRC @ 72 (3.815262485)	ARPC2	4392	1.64145	NRF1 @ 22 (4.046253517), CDH1 @ 48 (3.861344958), TRAF6 @ 60 (3.802540496), GRB2 @ 65 (3.770730971), PRKACA @ 69 (3.762362936), CDK2 @ 89 (3.699623682)
PSMD13	4209	1.82583	GRB2 @ 21 (4.184991908), UBA52 @ 58 (3.849143067), RPS27A @ 64 (3.841632945)	NOD1	4398	1.64075	NFKB1 @ 24 (4.021122149), RPS27A @ 35 (3.95946954), UBA52 @ 41 (3.930125003), TRAF6 @ 60 (3.802540496), HSP90AB1 @ 77 (3.725182879), HSP90AA1 @ 87 (3.706481498)
CTSS	4238	1.8208	PLCG1 @ 73 (3.813392608)	COMMD3	4421	1.63596	NFKB1 @ 24 (4.021122149)
ATP6V1H	4252	1.81771	EGFR @ 18 (4.255273461), ETHE1 @ 35 (3.964977825)	POLR3E	4426	1.63342	KEAP1 @ 83 (3.711971154)
POLR3K	4253	1.81764	TBP @ 13 (4.487899762)	HSPA6	4459	1.62487	NFKB1 @ 24 (4.021122149), CDK9 @ 40 (3.936164117), JUN @ 42 (3.928420791), HSP90AB1 @ 77 (3.725182879), HSP90AA1 @ 87 (3.706481498)
PSMD9	4262	1.81648	CDK2 @ 3 (4.692024128)	MAP2K4	4464	1.62351	APP @ 20 (4.06357256), JUN @ 42 (3.928420791), SIRT1 @ 61 (3.802094612), AKT1 @ 82 (3.716718023)
UBE2L6	4283	1.81212	RUNX1 @ 19 (4.230547681), UBA52 @ 58 (3.849143067), RPS27A @ 64 (3.841632945)	LAMTOR3	4489	1.6166	ELAVL1 @ 12 (4.178507033)
SELL	4288	1.81177	GRB2 @ 21 (4.184991908)	ATP6V1H	4551	1.60083	EGFR @ 8 (4.259252678), SOX9 @ 50 (3.856009024), MYC @ 56 (3.825986802)
CDC34	4313	1.81087	UBA52 @ 58 (3.849143067), RPS27A @ 64 (3.841632945)	PRDX6	4574	1.59542	H2AX @ 33 (3.978872976), YWHAE @ 37 (3.946570154), JUN @ 42 (3.928420791), NPM1 @ 79 (3.723229211), CDK2 @ 89 (3.699623682)
CYLD	4353	1.80247	TP53 @ 29 (4.011818792), UBA52 @ 58 (3.849143067), RPS27A @ 64 (3.841632945), YWHAB @ 75 (3.807771122)	BAIAP2	4582	1.59426	EGFR @ 8 (4.259252678), APP @ 20 (4.06357256), SRC @ 32 (3.98269232), YWHAE @ 37 (3.946570154), MDM2 @ 47 (3.863162591), AKT1 @ 82 (3.716718023), YWHAB @ 93 (3.686814642)
POLR3C	4380	1.79669	TBP @ 13 (4.487899762), APP @ 91 (3.745785722)	PSMB6	4613	1.58477	RPS27A @ 35 (3.95946954), UBA52 @ 41 (3.930125003), JUN @ 42 (3.928420791), MDM2 @ 47 (3.863162591), EZH2 @ 49 (3.859099803), TRAF6 @ 60 (3.802540496), CDK2 @ 89 (3.699623682)
CD14	4409	1.79181	PLCG2 @ 98 (3.731445794)	GPI	4646	1.57642	JUN @ 42 (3.928420791), CDK2 @ 89 (3.699623682)
FLG2	4429	1.78525	CDK2 @ 3 (4.692024128)	WASF2	4656	1.57514	SRC @ 32 (3.98269232), GRB2 @ 65 (3.770730971), PRKACA @ 69 (3.762362936)
PSME3	4438	1.78424	TP53 @ 29 (4.011818792), NPM1 @ 70 (3.818434018)	CYBA	4660	1.57442	SRC @ 32 (3.98269232), MYC @ 56 (3.825986802), AKT1 @ 82 (3.716718023)
MS4A3	4445	1.78332	CDK2 @ 3 (4.692024128)	IMPDH2	4691	1.56562	NFKB1 @ 24 (4.021122149), JUN @ 42 (3.928420791), GRB2 @ 65 (3.770730971), SOX2 @ 70 (3.761055665), NPM1 @ 79 (3.723229211), AKT1 @ 82 (3.716718023), CDK2 @ 89 (3.699623682), ESR1 @ 95 (3.677494751)
PSME1	4451	1.78213	GRB2 @ 21 (4.184991908), UBA52 @ 58 (3.849143067), PIK3R3 @ 88 (3.750814494), APP @ 91 (3.745785722)	IRAK2	4713	1.56036	NFKB1 @ 24 (4.021122149), TRAF6 @ 60 (3.802540496), HSP90AB1 @ 77 (3.725182879), AKT1 @ 82 (3.716718023), HSP90AA1 @ 87 (3.706481498)
PDAP1	4465	1.78	APP @ 91 (3.745785722)	LAMP2	4741	1.55569	ELAVL1 @ 12 (4.178507033), MDM2 @ 47 (3.863162591), HSP90AB1 @ 77 (3.725182879), NPM1 @ 79 (3.723229211), HSP90AA1 @ 87 (3.706481498)
WASF1	4475	1.77877	GRB2 @ 21 (4.184991908), SRC @ 72 (3.815262485)	PSMB9	4742	1.55545	SRC @ 32 (3.98269232), RPS27A @ 35 (3.95946954), ESR1 @ 95 (3.677494751)
PSMB3	4508	1.77333	TP53 @ 29 (4.011818792), UBA52 @ 58 (3.849143067), RPS27A @ 64 (3.841632945)	PSMB7	4754	1.55037	RPS27A @ 35 (3.95946954), UBA52 @ 41 (3.930125003)
CXCR1	4511	1.77264	CDK1 @ 36 (3.960479767), GRK2 @ 45 (3.906377942)	ATP6V1B1	4760	1.54997	JUN @ 42 (3.928420791), RAB35 @ 44 (3.880783612)
PTAFR	4529	1.76922	CLTC @ 68 (3.829350917), STAT3 @ 92 (3.744179493)	PLD1	4766	1.54836	EGFR @ 8 (4.259252678), NRF1 @ 22 (4.046253517), SRC @ 32 (3.98269232)
DIAPH1	4575	1.76207	GRB2 @ 21 (4.184991908), CDK1 @ 36 (3.960479767)	PSMD9	4773	1.54715	ELAVL1 @ 12 (4.178507033), CDK2 @ 89 (3.699623682)
BAIAP2	4584	1.76082	EGFR @ 18 (4.255273461), YWHAE @ 31 (4.000171791), SRC @ 72 (3.815262485), YWHAB @ 75 (3.807771122), APP @ 91 (3.745785722)	POLR3H	4800	1.54253	NRF1 @ 22 (4.046253517), YWHAE @ 37 (3.946570154)
MAP2K4	4603	1.75831	APP @ 91 (3.745785722)	APAF1	4827	1.53558	TP53 @ 7 (4.263878027), ELAVL1 @ 12 (4.178507033), YWHAE @ 37 (3.946570154), HSP90AB1 @ 77 (3.725182879), HSP90AA1 @ 87 (3.706481498)
CCR2	4608	1.7578	GRK2 @ 45 (3.906377942), GNB1 @ 80 (3.788808915), GNG2 @ 86 (3.766846214), STAT3 @ 92 (3.744179493)	IDH1	4839	1.53314	TP53 @ 7 (4.263878027), ELAVL1 @ 12 (4.178507033), CDK2 @ 89 (3.699623682)
DSN1	4614	1.75692	CDK1 @ 36 (3.960479767), CBX5 @ 60 (3.848006823), PIK3R3 @ 88 (3.750814494), APP @ 91 (3.745785722)	SERPINA3	4842	1.53216	APP @ 20 (4.06357256), NFKB1 @ 24 (4.021122149), ERBB2 @ 53 (3.843354357)
UBE2K	4677	1.74651	TP53 @ 29 (4.011818792), UBA52 @ 58 (3.849143067), RPS27A @ 64 (3.841632945), CLTC @ 68 (3.829350917)	TAX1BP1	4868	1.52593	TRAF6 @ 60 (3.802540496)
ATP6V1B1	4704	1.74226	RAB35 @ 17 (4.272343404), GNB1 @ 80 (3.788808915)	ATP6V1C1	4883	1.52407	NRF1 @ 22 (4.046253517), STAT1 @ 72 (3.759329862)
WASF2	4794	1.72755	GRB2 @ 21 (4.184991908), SRC @ 72 (3.815262485)	PSMD10	4891	1.52148	TP53 @ 7 (4.263878027), NFKB1 @ 24 (4.021122149), MDM2 @ 47 (3.863162591), RELA @ 55 (3.832644555), POU5F1 @ 90 (3.694597021)
CD46	4821	1.7228	SRC @ 72 (3.815262485)	FCGR3A	4948	1.50826	APP @ 20 (4.06357256), SRC @ 32 (3.98269232)
S100A1	4827	1.72088	TP53 @ 29 (4.011818792)	MAP3K8	4969	1.50436	CDK1 @ 18 (4.078436677), NFKB1 @ 24 (4.021122149), RELA @ 55 (3.832644555), TRAF6 @ 60 (3.802540496), HSP90AB1 @ 77 (3.725182879), NPM1 @ 79 (3.723229211), AKT1 @ 82 (3.716718023), HSP90AA1 @ 87 (3.706481498), CLTC @ 98 (3.665966184)
C1QA	4886	1.71056	DCN @ 53 (3.863807295)	RASGRP1	4989	1.50126	GRB2 @ 65 (3.770730971)
FCGR3A	4934	1.70337	SRC @ 72 (3.815262485), SHC1 @ 89 (3.749321692), APP @ 91 (3.745785722)	ALOX5	5003	1.49815	APP @ 20 (4.06357256), GRB2 @ 65 (3.770730971), PRKACA @ 69 (3.762362936)
DSC1	4952	1.69988	CDK2 @ 3 (4.692024128)	DHX36	5010	1.49745	JUN @ 42 (3.928420791), EZH2 @ 49 (3.859099803)
DOCK1	4982	1.69438	GRB2 @ 21 (4.184991908), SRC @ 72 (3.815262485)	MAPKAPK2	5023	1.49559	TP53 @ 7 (4.263878027), ELAVL1 @ 12 (4.178507033), MDM2 @ 47 (3.863162591), STAT3 @ 75 (3.739433125), AKT1 @ 82 (3.716718023), ESR1 @ 95 (3.677494751)
ECSIT	5048	1.68159	APP @ 91 (3.745785722)	DDX41	5046	1.49055	NRF1 @ 22 (4.046253517), JUN @ 42 (3.928420791)
CARD9	5052	1.68128	YWHAB @ 75 (3.807771122)	ELMO1	5055	1.48871	SRC @ 32 (3.98269232)
CST3	5053	1.68105	APP @ 91 (3.745785722), INS @ 94 (3.741981928)	S100A9	5070	1.48647	EGFR @ 8 (4.259252678), GRB2 @ 65 (3.770730971)
CLEC10A	5074	1.6779	MUC1 @ 46 (3.897446897)	ACTR1B	5098	1.48175	APP @ 20 (4.06357256)
POLR3GL	5080	1.67701	TBP @ 13 (4.487899762)	ARPC4	5119	1.4764	ELAVL1 @ 12 (4.178507033), JUN @ 42 (3.928420791), GRB2 @ 65 (3.770730971)
PRDX4	5109	1.67149	EP300 @ 44 (3.908165976), TERF2 @ 48 (3.885006348), TERF1 @ 65 (3.835912394), NPM1 @ 70 (3.818434018)	TNIP2	5155	1.46745	EP300 @ 3 (4.566455535), APP @ 20 (4.06357256), NFKB1 @ 24 (4.021122149), RELA @ 55 (3.832644555)
RAB3D	5132	1.66693	APP @ 91 (3.745785722)	SNAP23	5167	1.46586	ELAVL1 @ 12 (4.178507033), NRF1 @ 22 (4.046253517)
IRAK2	5207	1.65441	HSP90AB1 @ 47 (3.89559168), HRAS @ 55 (3.85675947)	PDZD11	5173	1.46491	NRF1 @ 22 (4.046253517), YWHAE @ 37 (3.946570154)
LRRC7	5218	1.65266	CTNNB1 @ 42 (3.926547961)	B4GALT1	5196	1.46086	ELAVL1 @ 12 (4.178507033)
MAPKAPK3	5228	1.65066	EGFR @ 18 (4.255273461), CDH1 @ 26 (4.048973937), NRAS @ 41 (3.934319021), SRC @ 72 (3.815262485), APP @ 91 (3.745785722)	CKAP4	5202	1.45976	EGFR @ 8 (4.259252678), ELAVL1 @ 12 (4.178507033), JUN @ 42 (3.928420791), MYC @ 56 (3.825986802), RAB7A @ 91 (3.694059873)
CD63	5246	1.64847	SRC @ 72 (3.815262485)	MAP2K7	5224	1.45631	ELAVL1 @ 12 (4.178507033), NRF1 @ 22 (4.046253517), JUN @ 42 (3.928420791), TRAF6 @ 60 (3.802540496), HSP90AB1 @ 77 (3.725182879), HSP90AA1 @ 87 (3.706481498)
CYFIP2	5263	1.64607	GRB2 @ 21 (4.184991908), SRC @ 72 (3.815262485), YWHAB @ 75 (3.807771122)	CASP4	5265	1.44419	APP @ 20 (4.06357256), TRAF6 @ 60 (3.802540496), CDK2 @ 89 (3.699623682)
PSMB7	5270	1.64517	UBA52 @ 58 (3.849143067), RPS27A @ 64 (3.841632945)	GLB1	5269	1.44343	NRF1 @ 22 (4.046253517), H2AX @ 33 (3.978872976)
POLR3G	5277	1.64426	TBP @ 13 (4.487899762)	PTPRB	5278	1.44027	EGFR @ 8 (4.259252678), CTNNB1 @ 23 (4.032609254), ERBB2 @ 53 (3.843354357)
ATP6V1B2	5322	1.63753	HSP90AB1 @ 47 (3.89559168), CLTC @ 68 (3.829350917)	LY96	5279	1.44025	TRAF6 @ 60 (3.802540496)
S100A11	5363	1.63278	EGFR @ 18 (4.255273461), NPM1 @ 70 (3.818434018)	AHSG	5286	1.43938	GRB2 @ 65 (3.770730971), AKT1 @ 82 (3.716718023)
LAMP1	5376	1.63119	EGFR @ 18 (4.255273461)	DCD	5290	1.43873	CDK9 @ 40 (3.936164117), MDM2 @ 47 (3.863162591), PRKACA @ 69 (3.762362936), CDK2 @ 89 (3.699623682)
DUSP3	5387	1.62909	EGFR @ 18 (4.255273461), APP @ 91 (3.745785722)	ATAD3B	5297	1.43702	TP53 @ 7 (4.263878027), NRF1 @ 22 (4.046253517), PNKP @ 26 (4.016412119), JUN @ 42 (3.928420791), MYC @ 56 (3.825986802)
GSDME	5394	1.6272	EGFR @ 18 (4.255273461), TP53 @ 29 (4.011818792), CYCS @ 81 (3.787614979)	CR1	5321	1.43268	RUNX1 @ 71 (3.759465655)
PSMD10	5436	1.61898	TP53 @ 29 (4.011818792)	HMOX2	5328	1.43068	APP @ 20 (4.06357256)
SUGT1	5452	1.61651	HSP90AB1 @ 47 (3.89559168)	NKIRAS1	5360	1.42392	APP @ 20 (4.06357256), BMPR1B @ 76 (3.725317326)
FCGR2A	5482	1.61118	SRC @ 72 (3.815262485), SHC1 @ 89 (3.749321692), PLCG2 @ 98 (3.731445794)	VAMP8	5370	1.42156	YWHAE @ 37 (3.946570154)
PLD2	5494	1.60856	EGFR @ 18 (4.255273461), GRB2 @ 21 (4.184991908), SRC @ 72 (3.815262485), PLCG1 @ 73 (3.813392608)	POLR3C	5407	1.41071	APP @ 20 (4.06357256)
CD36	5509	1.60672	SRC @ 72 (3.815262485), APP @ 91 (3.745785722)	DIAPH1	5408	1.41055	CDK1 @ 18 (4.078436677), GRB2 @ 65 (3.770730971)
IFI16	5518	1.60535	TP53 @ 29 (4.011818792), APP @ 91 (3.745785722)	ARPC3	5409	1.41029	GRB2 @ 65 (3.770730971), PRKACA @ 69 (3.762362936)
MAP2K7	5523	1.60445	HSP90AB1 @ 47 (3.89559168)	HERC5	5429	1.40628	CTNNB1 @ 23 (4.032609254), JUN @ 42 (3.928420791), STAT1 @ 72 (3.759329862)
MAP3K8	5526	1.60432	CDK1 @ 36 (3.960479767), HSP90AB1 @ 47 (3.89559168), CLTC @ 68 (3.829350917), NPM1 @ 70 (3.818434018)	PSMD5	5450	1.40299	TP53 @ 7 (4.263878027), ELAVL1 @ 12 (4.178507033), APP @ 20 (4.06357256), RPS27A @ 35 (3.95946954)
USP18	5527	1.6043	HSP90AB1 @ 47 (3.89559168), RPS27A @ 64 (3.841632945)	CLEC7A	5478	1.39776	SRC @ 32 (3.98269232)
WIPF1	5554	1.60083	GRB2 @ 21 (4.184991908)	GUSB	5507	1.39314	PRKACA @ 69 (3.762362936)
IGKV2D-28	5629	1.58869	EGFR @ 18 (4.255273461)	NDUFC2	5510	1.39248	ELAVL1 @ 12 (4.178507033)
SAA1	5648	1.58607	GNG2 @ 86 (3.766846214)	S100B	5550	1.38524	TP53 @ 7 (4.263878027), APP @ 20 (4.06357256), MDM2 @ 47 (3.863162591)
CASP10	5671	1.58269	TP53 @ 29 (4.011818792)	GSDME	5628	1.36914	TP53 @ 7 (4.263878027), EGFR @ 8 (4.259252678)
BRK1	5782	1.56183	PIK3R3 @ 88 (3.750814494)	MIF	5648	1.36613	TP53 @ 7 (4.263878027), TRAF6 @ 60 (3.802540496), HSP90AA1 @ 87 (3.706481498), CDK2 @ 89 (3.699623682)
PSMB8	5798	1.56024	RPS27A @ 64 (3.841632945)	CASP10	5660	1.36322	TP53 @ 7 (4.263878027)
UBA7	5857	1.54893	UBA52 @ 58 (3.849143067), RPS27A @ 64 (3.841632945)	WIPF1	5680	1.36005	ELAVL1 @ 12 (4.178507033), MYC @ 56 (3.825986802), GRB2 @ 65 (3.770730971)
GNS	5933	1.53739	GRB2 @ 21 (4.184991908), SRC @ 72 (3.815262485)	TOMM70	5707	1.35699	TRAF6 @ 60 (3.802540496), HSP90AB1 @ 77 (3.725182879), HSP90AA1 @ 87 (3.706481498)
CAP1	5955	1.53425	HSP90AB1 @ 47 (3.89559168)	PAK3	5721	1.35343	CDK2 @ 89 (3.699623682)
ELMO2	5989	1.52714	GRB2 @ 21 (4.184991908), NPM1 @ 70 (3.818434018)	S100A1	5734	1.35084	TP53 @ 7 (4.263878027), MDM2 @ 47 (3.863162591)
CCR6	5998	1.52611	GNB1 @ 80 (3.788808915), GNG2 @ 86 (3.766846214)	CD46	5750	1.34708	SRC @ 32 (3.98269232)
ALOX5	6011	1.52511	GRB2 @ 21 (4.184991908), APP @ 91 (3.745785722)	NLRC4	5794	1.33755	TP53 @ 7 (4.263878027)
S100A7	6014	1.52477	EGFR @ 18 (4.255273461), TERF2 @ 48 (3.885006348), TERF1 @ 65 (3.835912394), SHC1 @ 89 (3.749321692)	TEC	5796	1.33652	TP53 @ 7 (4.263878027), ERBB2 @ 53 (3.843354357), GRB2 @ 65 (3.770730971)
CXCL1	6019	1.52323	HRAS @ 55 (3.85675947), STAT3 @ 92 (3.744179493)	CMTM6	5810	1.33414	ELAVL1 @ 12 (4.178507033), DNMT3B @ 66 (3.768542304), XRCC6 @ 80 (3.718531754)
PDZD11	6080	1.51568	YWHAE @ 31 (4.000171791)	MLEC	5816	1.33322	ELAVL1 @ 12 (4.178507033), TRAF6 @ 60 (3.802540496), RAB7A @ 91 (3.694059873)
LAMP2	6089	1.51445	HSP90AB1 @ 47 (3.89559168), NPM1 @ 70 (3.818434018)	ATP6V1E1	5833	1.32988	APP @ 20 (4.06357256), JUN @ 42 (3.928420791), TRAF6 @ 60 (3.802540496), XRCC6 @ 80 (3.718531754)
PSMB9	6132	1.50667	RPS27A @ 64 (3.841632945), SRC @ 72 (3.815262485)	LAMTOR1	5849	1.3274	ELAVL1 @ 12 (4.178507033)
DYNLT1	6174	1.49906	APP @ 91 (3.745785722)	CR2	5865	1.32339	TP53 @ 7 (4.263878027)
OTUD5	6261	1.48508	GRB2 @ 21 (4.184991908), TP53 @ 29 (4.011818792), UBA52 @ 58 (3.849143067), RPS27A @ 64 (3.841632945)	PSMB10	5893	1.31792	RPS27A @ 35 (3.95946954)
ARPC3	6273	1.484	GRB2 @ 21 (4.184991908)	CYB5R3	5903	1.31572	CDK2 @ 89 (3.699623682)
PFKL	6275	1.48359	EGFR @ 18 (4.255273461), TERF2 @ 48 (3.885006348), APP @ 91 (3.745785722)	DSG1	5915	1.31433	CDK2 @ 89 (3.699623682), ESR1 @ 95 (3.677494751)
ARPC4	6335	1.47616	GRB2 @ 21 (4.184991908)	SUGT1	5954	1.3075	HSP90AB1 @ 77 (3.725182879), HSP90AA1 @ 87 (3.706481498)
LAMTOR1	6336	1.47605	GNAS @ 27 (4.026244404)	FTL	5965	1.30466	GRB2 @ 65 (3.770730971)
MAP2K3	6358	1.47189	TP53 @ 29 (4.011818792), APP @ 91 (3.745785722)	PGRMC1	5979	1.30252	EGFR @ 8 (4.259252678), TRAF6 @ 60 (3.802540496), CDK2 @ 89 (3.699623682)
TNIP2	6365	1.47021	EP300 @ 44 (3.908165976), APP @ 91 (3.745785722)	PRKCSH	5983	1.30139	H2AX @ 33 (3.978872976), JUN @ 42 (3.928420791), TRAF6 @ 60 (3.802540496), ESR1 @ 95 (3.677494751)
DOCK2	6431	1.45961	TERF1 @ 65 (3.835912394), SRC @ 72 (3.815262485)	MMP25	6069	1.28532	NRF1 @ 22 (4.046253517)
ELK1	6435	1.45908	GRB2 @ 21 (4.184991908), EP300 @ 44 (3.908165976), APP @ 91 (3.745785722), PLCG2 @ 98 (3.731445794)	PYGB	6075	1.28441	NPM1 @ 79 (3.723229211)
TMC6	6478	1.45272	STAT3 @ 92 (3.744179493)	RASGRP2	6079	1.28363	APP @ 20 (4.06357256), PRKACA @ 69 (3.762362936)
DOK3	6496	1.45046	GRB2 @ 21 (4.184991908), YWHAE @ 31 (4.000171791)	ATP6V0D1	6089	1.28151	CDK1 @ 18 (4.078436677), NRF1 @ 22 (4.046253517), RAB7A @ 91 (3.694059873), CLTC @ 98 (3.665966184)
TAB3	6499	1.45011	RPS27A @ 64 (3.841632945)	FCGR2A	6115	1.27638	SRC @ 32 (3.98269232)
ARPC5	6516	1.44729	EGFR @ 18 (4.255273461), GRB2 @ 21 (4.184991908)	PFKL	6183	1.26357	EGFR @ 8 (4.259252678), APP @ 20 (4.06357256)
PSME2	6519	1.44676	APP @ 91 (3.745785722)	TICAM1	6197	1.26108	TRAF6 @ 60 (3.802540496), STAT1 @ 72 (3.759329862), HSP90AA1 @ 87 (3.706481498)
ATOX1	6535	1.44389	UBA52 @ 58 (3.849143067)	TLR1	6202	1.26061	NFKB1 @ 24 (4.021122149), TRAF6 @ 60 (3.802540496)
LRG1	6538	1.44304	CYCS @ 81 (3.787614979)	TIRAP	6208	1.2591	APP @ 20 (4.06357256), TRAF6 @ 60 (3.802540496), STAT3 @ 75 (3.739433125)
PSMD5	6573	1.43637	TP53 @ 29 (4.011818792), RPS27A @ 64 (3.841632945), APP @ 91 (3.745785722)	ATOX1	6213	1.25714	UBA52 @ 41 (3.930125003)
LAIR1	6583	1.43436	APP @ 91 (3.745785722)	TXNDC5	6245	1.2503	APP @ 20 (4.06357256), HDAC2 @ 31 (3.989763953), H2AX @ 33 (3.978872976), JUN @ 42 (3.928420791), HSP90AA1 @ 87 (3.706481498)
VAMP8	6605	1.43137	YWHAE @ 31 (4.000171791)	SNAP29	6359	1.22762	NRF1 @ 22 (4.046253517)
ATP6V1E1	6648	1.42482	APP @ 91 (3.745785722)	DUSP3	6379	1.22391	EGFR @ 8 (4.259252678), ELAVL1 @ 12 (4.178507033), APP @ 20 (4.06357256), STAT1 @ 72 (3.759329862)
NCKIPSD	6665	1.42225	GRB2 @ 21 (4.184991908), SRC @ 72 (3.815262485), YWHAB @ 75 (3.807771122)	LYZ	6391	1.2226	NFKB1 @ 24 (4.021122149), JUN @ 42 (3.928420791), CDK2 @ 89 (3.699623682), ESR1 @ 95 (3.677494751)
TRIM32	6673	1.42057	YWHAE @ 31 (4.000171791), HSP90AB1 @ 47 (3.89559168), YWHAB @ 75 (3.807771122)	TLR8	6404	1.22031	TRAF6 @ 60 (3.802540496)
HERC5	6696	1.41762	CTNNB1 @ 42 (3.926547961)	PLAUR	6412	1.2179	ELAVL1 @ 12 (4.178507033)
NFASC	6706	1.41664	GRB2 @ 21 (4.184991908)	ATP6V1F	6458	1.21038	NRF1 @ 22 (4.046253517)
TLR7	6733	1.41183	STAT3 @ 92 (3.744179493)	TLR5	6487	1.20565	NFKB1 @ 24 (4.021122149), RELA @ 55 (3.832644555), TRAF6 @ 60 (3.802540496)
FPR2	6751	1.40965	GNB1 @ 80 (3.788808915), GNG2 @ 86 (3.766846214), APP @ 91 (3.745785722)	TRIM32	6492	1.20412	NRF1 @ 22 (4.046253517), YWHAE @ 37 (3.946570154), HSP90AB1 @ 77 (3.725182879), HSP90AA1 @ 87 (3.706481498), YWHAB @ 93 (3.686814642)
CLEC7A	6788	1.40474	SRC @ 72 (3.815262485), PLCG2 @ 98 (3.731445794)	PSME4	6495	1.20375	JUN @ 42 (3.928420791), MYC @ 56 (3.825986802)
SURF4	6830	1.39901	ERBB2 @ 67 (3.830356053), NPM1 @ 70 (3.818434018)	ATP6V0A2	6514	1.19973	ELAVL1 @ 12 (4.178507033), AKT1 @ 82 (3.716718023)
FTL	6850	1.39503	GRB2 @ 21 (4.184991908), PIK3CA @ 49 (3.87790566)	PSAP	6532	1.19585	BRCA1 @ 14 (4.109727894), NRF1 @ 22 (4.046253517), ERBB2 @ 53 (3.843354357)
NCKAP1	6860	1.39392	GRB2 @ 21 (4.184991908), YWHAB @ 75 (3.807771122)	MAGT1	6563	1.19044	JUN @ 42 (3.928420791)
PLD1	6862	1.39369	EGFR @ 18 (4.255273461), SRC @ 72 (3.815262485), PLCG1 @ 73 (3.813392608), PLCG2 @ 98 (3.731445794)	SIKE1	6566	1.18995	NRF1 @ 22 (4.046253517)
TIRAP	6889	1.38977	APP @ 91 (3.745785722), STAT3 @ 92 (3.744179493)	CYFIP2	6597	1.18244	SRC @ 32 (3.98269232), GRB2 @ 65 (3.770730971), AKT1 @ 82 (3.716718023), YWHAB @ 93 (3.686814642)
ACTR1B	6946	1.37983	APP @ 91 (3.745785722)	MAPKAPK3	6606	1.18018	EGFR @ 8 (4.259252678), APP @ 20 (4.06357256), SRC @ 32 (3.98269232), CDH1 @ 48 (3.861344958), EZH2 @ 49 (3.859099803)
IRAK3	6955	1.37859	HSP90AB1 @ 47 (3.89559168)	MGST1	6612	1.17977	ERBB2 @ 53 (3.843354357)
TOMM70	6957	1.37836	HSP90AB1 @ 47 (3.89559168)	NCKAP1	6636	1.17626	GRB2 @ 65 (3.770730971), YWHAB @ 93 (3.686814642)
TXNDC5	6962	1.37749	APP @ 91 (3.745785722)	CST3	6675	1.16872	APP @ 20 (4.06357256)
PSMB10	6992	1.37289	RPS27A @ 64 (3.841632945)	LPCAT1	6695	1.16519	ELAVL1 @ 12 (4.178507033), NRF1 @ 22 (4.046253517), ESR1 @ 95 (3.677494751)
PGM2	7013	1.37005	TERF1 @ 65 (3.835912394)	LRRFIP1	6708	1.16272	EP300 @ 3 (4.566455535), CTNNB1 @ 23 (4.032609254), EZH2 @ 49 (3.859099803), PRKACA @ 69 (3.762362936), ESR1 @ 95 (3.677494751)
PGAM1	7103	1.35791	APP @ 91 (3.745785722)	PTAFR	6709	1.16232	STAT1 @ 72 (3.759329862), STAT3 @ 75 (3.739433125), CLTC @ 98 (3.665966184)
MGST1	7131	1.35337	ERBB2 @ 67 (3.830356053)	CAP1	6722	1.15963	JUN @ 42 (3.928420791), SIRT1 @ 61 (3.802094612), HSP90AB1 @ 77 (3.725182879), HSP90AA1 @ 87 (3.706481498)
MAPK10	7190	1.34429	TP53 @ 29 (4.011818792), APP @ 91 (3.745785722)	PSMA8	6727	1.15833	MDM2 @ 47 (3.863162591), PRKACA @ 69 (3.762362936)
MYO10	7222	1.33862	TERF2 @ 48 (3.885006348)	RAB18	6730	1.15826	NRF1 @ 22 (4.046253517)
ARMC8	7287	1.32934	EGFR @ 18 (4.255273461), CTNNB1 @ 42 (3.926547961)	TBC1D10C	6748	1.15525	APP @ 20 (4.06357256), RAB35 @ 44 (3.880783612)
TICAM1	7308	1.32719	PIK3CA @ 49 (3.87790566)	ARPC5	6759	1.15268	EGFR @ 8 (4.259252678), ELAVL1 @ 12 (4.178507033), NRF1 @ 22 (4.046253517), GRB2 @ 65 (3.770730971), PRKACA @ 69 (3.762362936)
DNM3	7311	1.32693	GRB2 @ 21 (4.184991908), CLTC @ 68 (3.829350917)	PYGL	6812	1.14046	NRF1 @ 22 (4.046253517)
CFHR2	7353	1.32155	APP @ 91 (3.745785722)	IRAK3	6826	1.13781	TRAF6 @ 60 (3.802540496), HSP90AB1 @ 77 (3.725182879), HSP90AA1 @ 87 (3.706481498)
WASF3	7386	1.31649	EGFR @ 18 (4.255273461), PIK3R2 @ 57 (3.849769814)	C1QB	6846	1.13319	RELA @ 55 (3.832644555)
PGM1	7407	1.31281	TERF1 @ 65 (3.835912394), APP @ 91 (3.745785722)	BRK1	6861	1.13046	NRF1 @ 22 (4.046253517)
SNAP29	7441	1.30776	IGF1R @ 23 (4.061111546)	UBR4	6873	1.12807	NRF1 @ 22 (4.046253517), GRB2 @ 65 (3.770730971), SOX2 @ 70 (3.761055665)
C6	7485	1.29845	GRB2 @ 21 (4.184991908)	IQGAP2	6924	1.11995	MYC @ 56 (3.825986802), PRKACA @ 69 (3.762362936)
PSAP	7490	1.29706	ERBB2 @ 67 (3.830356053)	OLR1	6976	1.10982	ELAVL1 @ 12 (4.178507033)
ATP6V0D1	7519	1.29288	CDK1 @ 36 (3.960479767), CLTC @ 68 (3.829350917)	PLD3	6977	1.10956	NFKB1 @ 24 (4.021122149)
UBR4	7588	1.28306	GRB2 @ 21 (4.184991908)	RAB3D	6983	1.10821	APP @ 20 (4.06357256), AKT1 @ 82 (3.716718023)
WIPF2	7591	1.28261	GRB2 @ 21 (4.184991908)	MAPK10	6984	1.10814	TP53 @ 7 (4.263878027), APP @ 20 (4.06357256), JUN @ 42 (3.928420791), HDAC1 @ 45 (3.875037284), MDM2 @ 47 (3.863162591), RELA @ 55 (3.832644555), MYC @ 56 (3.825986802)
AAMP	7620	1.27887	EGFR @ 18 (4.255273461)	ATP6V1D	6988	1.1072	NRF1 @ 22 (4.046253517), MYC @ 56 (3.825986802), CLTC @ 98 (3.665966184)
NKIRAS1	7658	1.27386	APP @ 91 (3.745785722)	PRSS3	7011	1.10279	APP @ 20 (4.06357256), NFKB1 @ 24 (4.021122149), CDK9 @ 40 (3.936164117), JUN @ 42 (3.928420791), CDK2 @ 89 (3.699623682)
CCL22	7716	1.26318	STAT3 @ 92 (3.744179493)	ARPC1B	7025	1.09955	APP @ 20 (4.06357256), CDK2 @ 89 (3.699623682)
PROS1	7774	1.25343	NPM1 @ 70 (3.818434018)	AAMP	7044	1.0951	EGFR @ 8 (4.259252678), TP53BP1 @ 78 (3.725074195)
CREG1	7824	1.24529	TBP @ 13 (4.487899762)	HRNR	7070	1.08951	CDK9 @ 40 (3.936164117), CDK2 @ 89 (3.699623682), RAD51C @ 92 (3.688085298)
ICAM3	7832	1.24449	APP @ 91 (3.745785722)	DHX58	7096	1.08386	APP @ 20 (4.06357256), MYC @ 56 (3.825986802), TRAF6 @ 60 (3.802540496)
ADGRG3	7920	1.23122	GNB1 @ 80 (3.788808915), GNG2 @ 86 (3.766846214)	CANT1	7100	1.08284	NRF1 @ 22 (4.046253517)
RETN	8035	1.21579	FOXO1 @ 90 (3.74627242)	TICAM2	7129	1.07842	TRAF6 @ 60 (3.802540496)
CKAP4	8144	1.19977	EGFR @ 18 (4.255273461)	NFASC	7132	1.07772	GRB2 @ 65 (3.770730971)
LRRFIP1	8158	1.1983	CTNNB1 @ 42 (3.926547961), EP300 @ 44 (3.908165976)	OLFM4	7227	1.05884	APP @ 20 (4.06357256)
CD59	8162	1.19796	EGFR @ 18 (4.255273461), GRB2 @ 21 (4.184991908), SRC @ 72 (3.815262485)	TMC6	7325	1.04166	EZH2 @ 49 (3.859099803), STAT3 @ 75 (3.739433125)
CEACAM6	8254	1.18357	APP @ 91 (3.745785722)	PELI1	7376	1.03064	NRF1 @ 22 (4.046253517), TRAF6 @ 60 (3.802540496)
RNF216	8347	1.16992	UBA52 @ 58 (3.849143067), RPS27A @ 64 (3.841632945)	PKP1	7379	1.02934	MYC @ 56 (3.825986802)
PTPN4	8350	1.16969	GRB2 @ 21 (4.184991908)	FABP5	7397	1.0257	EGFR @ 8 (4.259252678), EZH2 @ 49 (3.859099803), TRAF6 @ 60 (3.802540496), CDK2 @ 89 (3.699623682)
ATP6V1D	8371	1.1663	CLTC @ 68 (3.829350917)	C6	7475	1.0111	GRB2 @ 65 (3.770730971)
PLA2G2A	8450	1.15433	DCN @ 53 (3.863807295)	SEMG1	7495	1.00832	NFKB1 @ 24 (4.021122149), JUN @ 42 (3.928420791), CDK2 @ 89 (3.699623682), ESR1 @ 95 (3.677494751)
FRK	8500	1.14761	EGFR @ 18 (4.255273461), HSP90AB1 @ 47 (3.89559168), STAT3 @ 92 (3.744179493)	TREX1	7581	0.99385	ATM @ 59 (3.803938404), NBN @ 68 (3.766088409), HSP90AB1 @ 77 (3.725182879)
CPNE3	8620	1.12905	TERF1 @ 65 (3.835912394)	ATP6V1G1	7643	0.983206	APP @ 20 (4.06357256), NRF1 @ 22 (4.046253517), JUN @ 42 (3.928420791), RAB7A @ 91 (3.694059873)
CNN2	8657	1.12474	SRC @ 72 (3.815262485)	CAB39	7666	0.977217	RAD51 @ 85 (3.708628165)
PRSS2	8666	1.12362	APP @ 91 (3.745785722)	BST1	7729	0.964502	SIRT1 @ 61 (3.802094612)
MS4A2	8766	1.10914	GRB2 @ 21 (4.184991908), APP @ 91 (3.745785722)	IMPDH1	7736	0.96419	XRCC6 @ 80 (3.718531754)
ARHGAP9	8768	1.10886	GRB2 @ 21 (4.184991908), FHL2 @ 82 (3.784994951), APP @ 91 (3.745785722)	CD58	7773	0.957008	APP @ 20 (4.06357256)
WIPF3	8781	1.10719	GRB2 @ 21 (4.184991908)	STING1	7774	0.956819	RPS27A @ 35 (3.95946954)
ARPC1A	8905	1.09226	GRB2 @ 21 (4.184991908)	CNN2	7787	0.954459	ELAVL1 @ 12 (4.178507033), SRC @ 32 (3.98269232)
DHX58	9075	1.07029	APP @ 91 (3.745785722)	GNS	7789	0.954424	NRF1 @ 22 (4.046253517), SRC @ 32 (3.98269232), GRB2 @ 65 (3.770730971)
OSTF1	9138	1.06095	SRC @ 72 (3.815262485), APP @ 91 (3.745785722)	CEACAM1	7792	0.95418	EGFR @ 8 (4.259252678), SRC @ 32 (3.98269232)
STING1	9179	1.05517	RPS27A @ 64 (3.841632945)	PGAM1	7860	0.940606	APP @ 20 (4.06357256), NRF1 @ 22 (4.046253517), JUN @ 42 (3.928420791), MDM2 @ 47 (3.863162591), XRCC6 @ 80 (3.718531754)
DNAJC13	9346	1.03334	EGFR @ 18 (4.255273461), NPM1 @ 70 (3.818434018)	RNF135	7868	0.93933	TRAF6 @ 60 (3.802540496)
ATAD3B	9400	1.02544	TP53 @ 29 (4.011818792), SHC1 @ 89 (3.749321692)	DBNL	7878	0.937106	CDK2 @ 89 (3.699623682)
IKBIP	9430	1.02138	TP53 @ 29 (4.011818792), APP @ 91 (3.745785722)	LRRC7	7941	0.924614	CTNNB1 @ 23 (4.032609254)
ADGRE5	9449	1.01958	SRC @ 72 (3.815262485)	DOCK2	7965	0.920943	SRC @ 32 (3.98269232)
TCIRG1	9684	0.99219	TERF1 @ 65 (3.835912394)	S100A11	7973	0.919184	EGFR @ 8 (4.259252678), TRAF6 @ 60 (3.802540496), NPM1 @ 79 (3.723229211)
ATP6V1G1	9693	0.991358	APP @ 91 (3.745785722)	NCKIPSD	8043	0.910659	NRF1 @ 22 (4.046253517), SRC @ 32 (3.98269232), GRB2 @ 65 (3.770730971), YWHAB @ 93 (3.686814642)
TKFC	9782	0.976254	YWHAB @ 75 (3.807771122)	ELMO2	8060	0.907803	GRB2 @ 65 (3.770730971), NPM1 @ 79 (3.723229211)
DPP7	9787	0.975822	PLCG1 @ 73 (3.813392608)	WASF3	8079	0.903827	EGFR @ 8 (4.259252678)
OLFM4	9846	0.968545	APP @ 91 (3.745785722)	SURF4	8119	0.894734	ERBB2 @ 53 (3.843354357), NPM1 @ 79 (3.723229211)
ZBP1	9870	0.964017	CTBP1 @ 34 (3.965358784)	PDAP1	8148	0.890435	APP @ 20 (4.06357256)
GAA	10020	0.940768	EP300 @ 44 (3.908165976)	OTUD5	8186	0.88458	TP53 @ 7 (4.263878027), NRF1 @ 22 (4.046253517), RPS27A @ 35 (3.95946954), UBA52 @ 41 (3.930125003), GRB2 @ 65 (3.770730971)
DEGS1	10090	0.932927	EGFR @ 18 (4.255273461)	FPR2	8251	0.873258	APP @ 20 (4.06357256)
ARHGAP45	10192	0.917772	YWHAE @ 31 (4.000171791)	RAB4B	8276	0.868397	RAB7A @ 91 (3.694059873)
PELI3	10225	0.912447	PIK3R3 @ 88 (3.750814494), APP @ 91 (3.745785722)	ARPC1A	8313	0.861714	ELAVL1 @ 12 (4.178507033), NRF1 @ 22 (4.046253517), GRB2 @ 65 (3.770730971), PRKACA @ 69 (3.762362936)
P2RX7	10264	0.907287	GRB2 @ 21 (4.184991908)	DNM3	8336	0.857423	NRF1 @ 22 (4.046253517), GRB2 @ 65 (3.770730971), CLTC @ 98 (3.665966184)
TREX1	10268	0.906724	HSP90AB1 @ 47 (3.89559168)	A1BG	8433	0.840972	NRF1 @ 22 (4.046253517)
BIN2	10270	0.906552	TERF1 @ 65 (3.835912394)	WIPF2	8462	0.834931	GRB2 @ 65 (3.770730971)
TRIM56	10352	0.892098	HSP90AB1 @ 47 (3.89559168)	SARM1	8467	0.834008	NRF1 @ 22 (4.046253517), TRAF6 @ 60 (3.802540496)
PLEKHO2	10412	0.884524	YWHAE @ 31 (4.000171791), APP @ 91 (3.745785722)	BST2	8495	0.828161	STAT1 @ 72 (3.759329862)
SIGIRR	10450	0.878559	APP @ 91 (3.745785722)	CPNE1	8573	0.813363	NRF1 @ 22 (4.046253517)
EPX	10602	0.856065	PLCG1 @ 73 (3.813392608)	LGMN	8583	0.811273	TRAF6 @ 60 (3.802540496)
DUSP4	10699	0.843745	APP @ 91 (3.745785722)	RNF216	8679	0.79411	BRCA1 @ 14 (4.109727894), RPS27A @ 35 (3.95946954), UBA52 @ 41 (3.930125003)
ACP3	10815	0.826202	ERBB2 @ 67 (3.830356053)	PGM1	8777	0.776118	APP @ 20 (4.06357256)
PTPRN2	11401	0.744767	GRB2 @ 21 (4.184991908)	NLRX1	8819	0.767761	MYC @ 56 (3.825986802), TRAF6 @ 60 (3.802540496)
DTX4	11529	0.730532	HSP90AB1 @ 47 (3.89559168)	FLG2	8824	0.766647	CDK2 @ 89 (3.699623682)
IRAG2	11540	0.729336	YWHAE @ 31 (4.000171791)	OSTF1	8897	0.751658	ELAVL1 @ 12 (4.178507033), APP @ 20 (4.06357256), NRF1 @ 22 (4.046253517), SRC @ 32 (3.98269232)
CD58	11560	0.726959	APP @ 91 (3.745785722)	DSC1	8901	0.750425	CDK2 @ 89 (3.699623682)
CD300LB	11589	0.722516	APP @ 91 (3.745785722)	PTPN4	8905	0.750121	NRF1 @ 22 (4.046253517), GRB2 @ 65 (3.770730971)
CEACAM3	11869	0.686942	SRC @ 72 (3.815262485)	LAIR1	9027	0.729618	APP @ 20 (4.06357256)
SCAMP1	12095	0.658241	EGFR @ 18 (4.255273461), TP53 @ 29 (4.011818792)	IKBIP	9044	0.726427	TP53 @ 7 (4.263878027), ELAVL1 @ 12 (4.178507033), APP @ 20 (4.06357256), JUN @ 42 (3.928420791)
FUCA1	12830	0.557254	APP @ 91 (3.745785722)	S100A7	9079	0.719242	EGFR @ 8 (4.259252678), ESR1 @ 95 (3.677494751)
NBEAL2	12850	0.554282	EGFR @ 18 (4.255273461)	LAT2	9080	0.719067	GRB2 @ 65 (3.770730971)
MUCL1	13014	0.53475	ERBB2 @ 67 (3.830356053)	KCMF1	9106	0.714663	SOX2 @ 70 (3.761055665)
LY86	13136	0.517516	APP @ 91 (3.745785722)	SIGIRR	9156	0.704392	APP @ 20 (4.06357256), TRAF6 @ 60 (3.802540496)
GZMM	13197	0.508258	NPM1 @ 70 (3.818434018)	PROS1	9213	0.695188	NPM1 @ 79 (3.723229211)
C1orf35	13898	0.414684	APP @ 91 (3.745785722)	TRAPPC1	9220	0.694123	NRF1 @ 22 (4.046253517)
GNLY	14049	0.392537	APP @ 91 (3.745785722)	CSTB	9221	0.693714	JUN @ 42 (3.928420791)
ALPK1	14140	0.378935	HSP90AB1 @ 47 (3.89559168)	TKFC	9420	0.657174	YWHAB @ 93 (3.686814642)
DEFA6	15239	0.256342	APP @ 91 (3.745785722)	CFHR2	9431	0.65637	APP @ 20 (4.06357256)
				CPNE3	9459	0.650011	ELAVL1 @ 12 (4.178507033)
				DUSP7	9483	0.6463	ELAVL1 @ 12 (4.178507033)
				PELI2	9603	0.628047	TRAF6 @ 60 (3.802540496)
				VRK3	9706	0.611243	NRF1 @ 22 (4.046253517), JUN @ 42 (3.928420791)
				LRRC14	9761	0.602943	NRF1 @ 22 (4.046253517)
				LTA4H	9767	0.601931	ELAVL1 @ 12 (4.178507033), SIRT1 @ 61 (3.802094612)
				DUSP6	9778	0.600214	HDAC2 @ 31 (3.989763953)
				PRSS2	9843	0.58879	APP @ 20 (4.06357256)
				ORMDL3	9932	0.575328	ELAVL1 @ 12 (4.178507033), APP @ 20 (4.06357256)
				ATP6V0E2	9942	0.573399	NRF1 @ 22 (4.046253517)
				PTGES2	9972	0.568061	H2AX @ 33 (3.978872976), MYC @ 56 (3.825986802)
				MS4A2	10024	0.558828	APP @ 20 (4.06357256), GRB2 @ 65 (3.770730971), AKT1 @ 82 (3.716718023), HSP90AA1 @ 87 (3.706481498)
				MYO9B	10027	0.558399	MYC @ 56 (3.825986802)
				DEFB4A	10039	0.555193	RELA @ 55 (3.832644555)
				RAP2C	10107	0.544906	ELAVL1 @ 12 (4.178507033)
				FRK	10158	0.534341	EGFR @ 8 (4.259252678), BRCA1 @ 14 (4.109727894), STAT3 @ 75 (3.739433125), HSP90AB1 @ 77 (3.725182879), HSP90AA1 @ 87 (3.706481498)
				GAA	10176	0.529972	EP300 @ 3 (4.566455535), NRF1 @ 22 (4.046253517)
				APEH	10225	0.520692	STAT1 @ 72 (3.759329862)
				P2RX7	10308	0.506451	GRB2 @ 65 (3.770730971)
				DUSP4	10319	0.504748	APP @ 20 (4.06357256)
				PELI3	10379	0.494686	APP @ 20 (4.06357256), TRAF6 @ 60 (3.802540496)
				SLC2A3	10444	0.483233	ELAVL1 @ 12 (4.178507033)
				COTL1	10461	0.479893	ELAVL1 @ 12 (4.178507033)
				DNAJC13	10489	0.473876	EGFR @ 8 (4.259252678), NRF1 @ 22 (4.046253517), JUN @ 42 (3.928420791), NPM1 @ 79 (3.723229211)
				DEGS1	10583	0.454921	EGFR @ 8 (4.259252678)
				TRIM56	10626	0.448307	HSP90AB1 @ 77 (3.725182879), HSP90AA1 @ 87 (3.706481498)
				CEACAM6	10715	0.43177	APP @ 20 (4.06357256)
				CD300LB	10838	0.414728	APP @ 20 (4.06357256)
				PDXK	10895	0.406625	ELAVL1 @ 12 (4.178507033)
				TIFA	10901	0.405389	ELAVL1 @ 12 (4.178507033), TRAF6 @ 60 (3.802540496)
				VAT1	11101	0.37524	H2AX @ 33 (3.978872976), CDK2 @ 89 (3.699623682)
				NPC2	11112	0.373348	BRCA1 @ 14 (4.109727894)
				PADI2	11181	0.366061	H3C13 @ 28 (3.995298939), H3C12 @ 30 (3.990523587), MYC @ 56 (3.825986802)
				ARSB	11197	0.364222	MYC @ 56 (3.825986802), ESR1 @ 95 (3.677494751)
				SCAMP1	11268	0.353646	TP53 @ 7 (4.263878027), EGFR @ 8 (4.259252678), ELAVL1 @ 12 (4.178507033), NRF1 @ 22 (4.046253517)
				WIPF3	11288	0.350944	GRB2 @ 65 (3.770730971)
				SERPINB12	11353	0.341289	EZH2 @ 49 (3.859099803)
				ARHGAP9	11359	0.340831	APP @ 20 (4.06357256), GRB2 @ 65 (3.770730971)
				DOK3	11387	0.337108	YWHAE @ 37 (3.946570154), GRB2 @ 65 (3.770730971)
				ADGRE5	11427	0.33018	SRC @ 32 (3.98269232)
				TMEM30A	11755	0.287898	ELAVL1 @ 12 (4.178507033)
				C6orf120	11828	0.279177	RAB7A @ 91 (3.694059873)
				PLEKHO2	11870	0.274673	APP @ 20 (4.06357256), YWHAE @ 37 (3.946570154)
				NLRP4	11882	0.272679	HSP90AA1 @ 87 (3.706481498)
				TSPAN14	11891	0.271363	ELAVL1 @ 12 (4.178507033), NRF1 @ 22 (4.046253517)
				N4BP1	12192	0.234384	NRF1 @ 22 (4.046253517)
				ARHGAP45	12216	0.230923	NRF1 @ 22 (4.046253517), YWHAE @ 37 (3.946570154)
				GZMM	12255	0.225495	NPM1 @ 79 (3.723229211)
				ACP3	12281	0.222622	ERBB2 @ 53 (3.843354357)
				RHOF	12304	0.219951	ELAVL1 @ 12 (4.178507033)
				DTX4	12368	0.212315	HSP90AB1 @ 77 (3.725182879), HSP90AA1 @ 87 (3.706481498)
				GNLY	12506	0.198276	APP @ 20 (4.06357256)
				LY86	12581	0.190018	APP @ 20 (4.06357256)
				PRG2	12783	0.169995	AKT1 @ 82 (3.716718023)
				FUCA1	12791	0.16816	APP @ 20 (4.06357256)
				NLRC3	12827	0.16395	TRAF6 @ 60 (3.802540496)
				PTPRN2	12995	0.147277	GRB2 @ 65 (3.770730971)
				GM2A	13027	0.144345	ELAVL1 @ 12 (4.178507033)
				TRIM4	13061	0.141723	MDM2 @ 47 (3.863162591)
				GCA	13179	0.132711	ELAVL1 @ 12 (4.178507033)
				CEACAM3	13952	0.0713047	SRC @ 32 (3.98269232)
				TMEM63A	14153	0.0593652	NRF1 @ 22 (4.046253517)
				C1orf35	14408	0.0464801	APP @ 20 (4.06357256)
				IRAG2	14490	0.0426213	YWHAE @ 37 (3.946570154)
				ANO6	14564	0.0392662	ELAVL1 @ 12 (4.178507033)
				PLAC8	14657	0.0359833	ELAVL1 @ 12 (4.178507033)
				ATP11A	14696	0.0345809	NRF1 @ 22 (4.046253517)
				MUCL1	14837	0.0288067	ERBB2 @ 53 (3.843354357)
				NBEAL2	15119	0.0199045	EGFR @ 8 (4.259252678)
				DEFA6	15266	0.0160636	APP @ 20 (4.06357256)
				ALPK1	15429	0.0126907	HSP90AB1 @ 77 (3.725182879)
				MS4A3	15458	0.0121267	CDK2 @ 89 (3.699623682)
				BPIFA1	15638	0.00836092	JUN @ 42 (3.928420791)
				SLC44A2	15738	0.00682788	NRF1 @ 22 (4.046253517)

## Sheet: Table S3.4
Table S3.4 Prioritized cytokine signaling genes and first neighbors
East Asian				European
Gene (Source node)	Ovary Si rank	Ovary Si rating	First neighbor gene(s) with rank and score	Gene (Source node)	Ovary Si rank	Ovary Si rating	First neighbor gene(s) with rank and score
KPNA2	20	4.18529	CDK2 @ 3 (4.692024128), GRB2 @ 21 (4.184991908), TP53 @ 29 (4.011818792), CDK1 @ 36 (3.960479767), EP300 @ 44 (3.908165976), HSP90AB1 @ 47 (3.89559168), TERF2 @ 48 (3.885006348), CBX5 @ 60 (3.848006823), TERF1 @ 65 (3.835912394), NPM1 @ 70 (3.818434018), LEF1 @ 87 (3.764766052), APP @ 91 (3.745785722)	TP53	7	4.26388	EP300 @ 3 (4.566455535), RPS26 @ 4 (4.467848456), EGFR @ 8 (4.259252678), XRCC1 @ 9 (4.232647006), CHEK2 @ 10 (4.196264648), ELAVL1 @ 12 (4.178507033), BRCA1 @ 14 (4.109727894), KPNA2 @ 16 (4.098579501), CDK1 @ 18 (4.078436677), RAD50 @ 19 (4.067545896), NFKB1 @ 24 (4.021122149), SMARCA4 @ 27 (4.004652833), ERBB4 @ 29 (3.99164713), H3C12 @ 30 (3.990523587), HDAC2 @ 31 (3.989763953), SRC @ 32 (3.9…
GRB2	21	4.18499	ERBB3 @ 1 (5), RPS26 @ 4 (4.685311238), INSR @ 10 (4.567054143), IKZF3 @ 16 (4.29678545), EGFR @ 18 (4.255273461), KPNA2 @ 20 (4.185288434), IGF1R @ 23 (4.061111546), TP53 @ 29 (4.011818792), YWHAE @ 31 (4.000171791), EML4 @ 38 (3.949610242), NRAS @ 41 (3.934319021), KRAS @ 43 (3.922588159), EP300 @ 44 (3.908165976), MUC1 @ 46 (3.897446897), HSP90AB1 @ 47 (3.89559168), PIK3CA @ 49 (3.87790566), H…	KPNA2	16	4.09858	EP300 @ 3 (4.566455535), TP53 @ 7 (4.263878027), CHEK2 @ 10 (4.196264648), BRCA1 @ 14 (4.109727894), CDK1 @ 18 (4.078436677), APP @ 20 (4.06357256), NFKB1 @ 24 (4.021122149), SMARCA4 @ 27 (4.004652833), IRF1 @ 39 (3.937384347), CDK9 @ 40 (3.936164117), JUN @ 42 (3.928420791), RELA @ 55 (3.832644555), MYC @ 56 (3.825986802), FEN1 @ 57 (3.81699797), SIRT1 @ 61 (3.802094612), GRB2 @ 65 (3.770730971)…
TP53	29	4.01182	CDK2 @ 3 (4.692024128), RPS26 @ 4 (4.685311238), TBP @ 13 (4.487899762), EGFR @ 18 (4.255273461), RUNX1 @ 19 (4.230547681), KPNA2 @ 20 (4.185288434), GRB2 @ 21 (4.184991908), IGF1R @ 23 (4.061111546), GNAS @ 27 (4.026244404), YWHAE @ 31 (4.000171791), SIN3A @ 33 (3.966211795), CTBP1 @ 34 (3.965358784), ETHE1 @ 35 (3.964977825), CDK1 @ 36 (3.960479767), EP300 @ 44 (3.908165976), GRK2 @ 45 (3.90637…	CDK1	18	4.07844	EP300 @ 3 (4.566455535), MAPRE1 @ 6 (4.289142824), TP53 @ 7 (4.263878027), EGFR @ 8 (4.259252678), ELAVL1 @ 12 (4.178507033), LIG3 @ 13 (4.116238444), BRCA1 @ 14 (4.109727894), YAP1 @ 15 (4.103703234), KPNA2 @ 16 (4.098579501), APP @ 20 (4.06357256), RAB5B @ 21 (4.053134222), NRF1 @ 22 (4.046253517), CTNNB1 @ 23 (4.032609254), NFKB1 @ 24 (4.021122149), H3C13 @ 28 (3.995298939), H3C12 @ 30 (3.9905…
CDK1	36	3.96048	CDK2 @ 3 (4.692024128), YAP1 @ 8 (4.590383402), EGFR @ 18 (4.255273461), RUNX1 @ 19 (4.230547681), KPNA2 @ 20 (4.185288434), PTCH1 @ 24 (4.060915524), TP53 @ 29 (4.011818792), CTNNB1 @ 42 (3.926547961), KRAS @ 43 (3.922588159), EP300 @ 44 (3.908165976), HSP90AB1 @ 47 (3.89559168), TERF1 @ 65 (3.835912394), ERBB2 @ 67 (3.830356053), NPM1 @ 70 (3.818434018), SRC @ 72 (3.815262485), RAB5B @ 78 (3.79…	APP	20	4.06357	RPS26 @ 4 (4.467848456), MAPRE1 @ 6 (4.289142824), EGFR @ 8 (4.259252678), CHEK2 @ 10 (4.196264648), LIG3 @ 13 (4.116238444), KPNA2 @ 16 (4.098579501), CDK1 @ 18 (4.078436677), CTNNB1 @ 23 (4.032609254), NFKB1 @ 24 (4.021122149), PNKP @ 26 (4.016412119), SRC @ 32 (3.98269232), RPS27A @ 35 (3.95946954), JUN @ 42 (3.928420791), RAB35 @ 44 (3.880783612), MDM2 @ 47 (3.863162591), FEN1 @ 57 (3.8169979…
NRAS	41	3.93432	ERBB3 @ 1 (5), EGFR @ 18 (4.255273461), RUNX1 @ 19 (4.230547681), GRB2 @ 21 (4.184991908), IGF1R @ 23 (4.061111546), GNAS @ 27 (4.026244404), EML4 @ 38 (3.949610242), CTNNB1 @ 42 (3.926547961), KRAS @ 43 (3.922588159), PIK3CA @ 49 (3.87790566), HRAS @ 55 (3.85675947), PIK3R2 @ 57 (3.849769814), ERBB2 @ 67 (3.830356053), NPM1 @ 70 (3.818434018), SRC @ 72 (3.815262485), YWHAB @ 75 (3.807771122), PI…	NFKB1	24	4.02112	EP300 @ 3 (4.566455535), TP53 @ 7 (4.263878027), EGFR @ 8 (4.259252678), ELAVL1 @ 12 (4.178507033), BRCA1 @ 14 (4.109727894), KPNA2 @ 16 (4.098579501), CDK1 @ 18 (4.078436677), RAD50 @ 19 (4.067545896), APP @ 20 (4.06357256), CTNNB1 @ 23 (4.032609254), HDAC2 @ 31 (3.989763953), SRC @ 32 (3.98269232), FOXP3 @ 34 (3.966832631), IRF1 @ 39 (3.937384347), CDK9 @ 40 (3.936164117), UBA52 @ 41 (3.9301250…
KRAS	43	3.92259	ERBB3 @ 1 (5), EGFR @ 18 (4.255273461), GRB2 @ 21 (4.184991908), IGF1R @ 23 (4.061111546), CDH1 @ 26 (4.048973937), GNAS @ 27 (4.026244404), CDK1 @ 36 (3.960479767), EML4 @ 38 (3.949610242), NRAS @ 41 (3.934319021), CTNNB1 @ 42 (3.926547961), EP300 @ 44 (3.908165976), PIK3CA @ 49 (3.87790566), HRAS @ 55 (3.85675947), PIK3R2 @ 57 (3.849769814), ERBB2 @ 67 (3.830356053), NPM1 @ 70 (3.818434018), SR…	SMARCA4	27	4.00465	GATA4 @ 1 (5), EP300 @ 3 (4.566455535), TP53 @ 7 (4.263878027), BRCA1 @ 14 (4.109727894), KPNA2 @ 16 (4.098579501), NRF1 @ 22 (4.046253517), CTNNB1 @ 23 (4.032609254), H3C13 @ 28 (3.995298939), H3C12 @ 30 (3.990523587), HDAC2 @ 31 (3.989763953), H2AX @ 33 (3.978872976), IRF1 @ 39 (3.937384347), JUN @ 42 (3.928420791), HDAC1 @ 45 (3.875037284), MDM2 @ 47 (3.863162591), EZH2 @ 49 (3.859099803), H4C…
MUC1	46	3.89745	ERBB3 @ 1 (5), TBP @ 13 (4.487899762), EGFR @ 18 (4.255273461), GRB2 @ 21 (4.184991908), TP53 @ 29 (4.011818792), CTNNB1 @ 42 (3.926547961), ERBB2 @ 67 (3.830356053), SRC @ 72 (3.815262485), ERBB4 @ 84 (3.769879596), STAT3 @ 92 (3.744179493), MUC4 @ 97 (3.732637271)	H3C13	28	3.9953	EP300 @ 3 (4.566455535), BRCA1 @ 14 (4.109727894), CDK1 @ 18 (4.078436677), CTNNB1 @ 23 (4.032609254), SMARCA4 @ 27 (4.004652833), H3C12 @ 30 (3.990523587), HDAC2 @ 31 (3.989763953), H2AX @ 33 (3.978872976), RPS27A @ 35 (3.95946954), UBA52 @ 41 (3.930125003), JUN @ 42 (3.928420791), HDAC1 @ 45 (3.875037284), EZH2 @ 49 (3.859099803), H4C6 @ 52 (3.853376106), H3-3B @ 54 (3.833825465), RELA @ 55 (3.…
PIK3CA	49	3.87791	ERBB3 @ 1 (5), INSR @ 10 (4.567054143), EGFR @ 18 (4.255273461), GRB2 @ 21 (4.184991908), IGF1R @ 23 (4.061111546), TP53 @ 29 (4.011818792), EML4 @ 38 (3.949610242), NRAS @ 41 (3.934319021), CTNNB1 @ 42 (3.926547961), KRAS @ 43 (3.922588159), HRAS @ 55 (3.85675947), PIK3R2 @ 57 (3.849769814), ERBB2 @ 67 (3.830356053), NPM1 @ 70 (3.818434018), SRC @ 72 (3.815262485), PLCG1 @ 73 (3.813392608), PIK3…	H3C12	30	3.99052	EP300 @ 3 (4.566455535), TP53 @ 7 (4.263878027), CHEK2 @ 10 (4.196264648), BRCA1 @ 14 (4.109727894), CDK1 @ 18 (4.078436677), CTNNB1 @ 23 (4.032609254), SMARCA4 @ 27 (4.004652833), H3C13 @ 28 (3.995298939), HDAC2 @ 31 (3.989763953), H2AX @ 33 (3.978872976), RPS27A @ 35 (3.95946954), UBA52 @ 41 (3.930125003), JUN @ 42 (3.928420791), HDAC1 @ 45 (3.875037284), EZH2 @ 49 (3.859099803), H4C6 @ 52 (3.8…
HRAS	55	3.85676	ERBB3 @ 1 (5), INSR @ 10 (4.567054143), IKZF3 @ 16 (4.29678545), EGFR @ 18 (4.255273461), GRB2 @ 21 (4.184991908), IGF1R @ 23 (4.061111546), CDH1 @ 26 (4.048973937), GNAS @ 27 (4.026244404), TP53 @ 29 (4.011818792), EML4 @ 38 (3.949610242), NRAS @ 41 (3.934319021), CTNNB1 @ 42 (3.926547961), KRAS @ 43 (3.922588159), PIK3CA @ 49 (3.87790566), PIK3R2 @ 57 (3.849769814), ERBB2 @ 67 (3.830356053), SR…	SRC	32	3.98269	ERBB3 @ 2 (4.731127927), EP300 @ 3 (4.566455535), TP53 @ 7 (4.263878027), EGFR @ 8 (4.259252678), LIG3 @ 13 (4.116238444), BRCA1 @ 14 (4.109727894), YAP1 @ 15 (4.103703234), CDK1 @ 18 (4.078436677), APP @ 20 (4.06357256), NRF1 @ 22 (4.046253517), CTNNB1 @ 23 (4.032609254), NFKB1 @ 24 (4.021122149), ERBB4 @ 29 (3.99164713), YWHAE @ 37 (3.946570154), JUN @ 42 (3.928420791), MDM2 @ 47 (3.863162591),…
POMC	56	3.85228	FSHR @ 6 (4.659420845), LHCGR @ 7 (4.604929351), GNAS @ 27 (4.026244404), ADCYAP1 @ 32 (3.997515734), CGA @ 50 (3.870818409), FSHB @ 66 (3.831351213), TSHB @ 69 (3.819843975), GNB1 @ 80 (3.788808915), GCG @ 85 (3.767022136), GNG2 @ 86 (3.766846214), FOXO1 @ 90 (3.74627242), APP @ 91 (3.745785722), STAT3 @ 92 (3.744179493)	RPS27A	35	3.95947	RPS26 @ 4 (4.467848456), TP53 @ 7 (4.263878027), EGFR @ 8 (4.259252678), BRCA1 @ 14 (4.109727894), APP @ 20 (4.06357256), CTNNB1 @ 23 (4.032609254), H3C13 @ 28 (3.995298939), H3C12 @ 30 (3.990523587), H2AX @ 33 (3.978872976), UBA52 @ 41 (3.930125003), JUN @ 42 (3.928420791), MDM2 @ 47 (3.863162591), CDH1 @ 48 (3.861344958), H4C6 @ 52 (3.853376106), ERBB2 @ 53 (3.843354357), RELA @ 55 (3.832644555…
PIK3R2	57	3.84977	ERBB3 @ 1 (5), INSR @ 10 (4.567054143), IKZF3 @ 16 (4.29678545), EGFR @ 18 (4.255273461), GRB2 @ 21 (4.184991908), IGF1R @ 23 (4.061111546), EML4 @ 38 (3.949610242), NRAS @ 41 (3.934319021), KRAS @ 43 (3.922588159), PIK3CA @ 49 (3.87790566), HRAS @ 55 (3.85675947), ERBB2 @ 67 (3.830356053), SRC @ 72 (3.815262485), PLCG1 @ 73 (3.813392608), YWHAB @ 75 (3.807771122), PIK3CD @ 76 (3.806903236), PIK3…	IRF1	39	3.93738	EP300 @ 3 (4.566455535), KPNA2 @ 16 (4.098579501), NFKB1 @ 24 (4.021122149), SMARCA4 @ 27 (4.004652833), HDAC2 @ 31 (3.989763953), JUN @ 42 (3.928420791), HDAC1 @ 45 (3.875037284), MDM2 @ 47 (3.863162591), RELA @ 55 (3.832644555), AR @ 64 (3.786837043), STAT1 @ 72 (3.759329862), STAT3 @ 75 (3.739433125), NPM1 @ 79 (3.723229211), KEAP1 @ 83 (3.711971154), HSP90AA1 @ 87 (3.706481498)
UBA52	58	3.84914	CDK2 @ 3 (4.692024128), RPS26 @ 4 (4.685311238), FSHR @ 6 (4.659420845), TBP @ 13 (4.487899762), GRB2 @ 21 (4.184991908), CDH1 @ 26 (4.048973937), GRK2 @ 45 (3.906377942), RPS27A @ 64 (3.841632945)	UBA52	41	3.93013	RPS26 @ 4 (4.467848456), NRF1 @ 22 (4.046253517), NFKB1 @ 24 (4.021122149), H3C13 @ 28 (3.995298939), H3C12 @ 30 (3.990523587), H2AX @ 33 (3.978872976), RPS27A @ 35 (3.95946954), JUN @ 42 (3.928420791), MDM2 @ 47 (3.863162591), CDH1 @ 48 (3.861344958), H4C6 @ 52 (3.853376106), FSHR @ 58 (3.813411806), TRAF6 @ 60 (3.802540496), ERCC6 @ 63 (3.791796078), GRB2 @ 65 (3.770730971), BMPR1B @ 76 (3.7253…
RPS27A	64	3.84163	CDK2 @ 3 (4.692024128), RPS26 @ 4 (4.685311238), FSHR @ 6 (4.659420845), EGFR @ 18 (4.255273461), CDH1 @ 26 (4.048973937), TP53 @ 29 (4.011818792), CTNNB1 @ 42 (3.926547961), HSP90AB1 @ 47 (3.89559168), UBA52 @ 58 (3.849143067), ERBB2 @ 67 (3.830356053), APP @ 91 (3.745785722)	JUN	42	3.92842	EP300 @ 3 (4.566455535), RPS26 @ 4 (4.467848456), TP53 @ 7 (4.263878027), EGFR @ 8 (4.259252678), ELAVL1 @ 12 (4.178507033), LIG3 @ 13 (4.116238444), BRCA1 @ 14 (4.109727894), YAP1 @ 15 (4.103703234), KPNA2 @ 16 (4.098579501), CDK1 @ 18 (4.078436677), RAD50 @ 19 (4.067545896), APP @ 20 (4.06357256), CTNNB1 @ 23 (4.032609254), NFKB1 @ 24 (4.021122149), SMARCA4 @ 27 (4.004652833), H3C13 @ 28 (3.995…
NPM1	70	3.81843	CDK2 @ 3 (4.692024128), EGFR @ 18 (4.255273461), KPNA2 @ 20 (4.185288434), GRB2 @ 21 (4.184991908), TP53 @ 29 (4.011818792), YWHAE @ 31 (4.000171791), CDK1 @ 36 (3.960479767), EML4 @ 38 (3.949610242), NRAS @ 41 (3.934319021), KRAS @ 43 (3.922588159), EP300 @ 44 (3.908165976), GRK2 @ 45 (3.906377942), HSP90AB1 @ 47 (3.89559168), PIK3CA @ 49 (3.87790566), CLTC @ 68 (3.829350917), PLCG1 @ 73 (3.8133…	RELA	55	3.83264	EP300 @ 3 (4.566455535), TP53 @ 7 (4.263878027), EGFR @ 8 (4.259252678), BRCA1 @ 14 (4.109727894), YAP1 @ 15 (4.103703234), KPNA2 @ 16 (4.098579501), NRF1 @ 22 (4.046253517), CTNNB1 @ 23 (4.032609254), NFKB1 @ 24 (4.021122149), H3C13 @ 28 (3.995298939), H3C12 @ 30 (3.990523587), HDAC2 @ 31 (3.989763953), FOXP3 @ 34 (3.966832631), RPS27A @ 35 (3.95946954), IRF1 @ 39 (3.937384347), CDK9 @ 40 (3.936…
SRC	72	3.81526	ERBB3 @ 1 (5), YAP1 @ 8 (4.590383402), INSR @ 10 (4.567054143), EGFR @ 18 (4.255273461), RUNX1 @ 19 (4.230547681), GRB2 @ 21 (4.184991908), IGF1R @ 23 (4.061111546), CDH1 @ 26 (4.048973937), GNAS @ 27 (4.026244404), TP53 @ 29 (4.011818792), YWHAE @ 31 (4.000171791), CDK1 @ 36 (3.960479767), NRAS @ 41 (3.934319021), CTNNB1 @ 42 (3.926547961), KRAS @ 43 (3.922588159), EP300 @ 44 (3.908165976), GRK2…	MYC	56	3.82599	EP300 @ 3 (4.566455535), TP53 @ 7 (4.263878027), EGFR @ 8 (4.259252678), ELAVL1 @ 12 (4.178507033), BRCA1 @ 14 (4.109727894), KPNA2 @ 16 (4.098579501), CDK1 @ 18 (4.078436677), RAD50 @ 19 (4.067545896), CTNNB1 @ 23 (4.032609254), NFKB1 @ 24 (4.021122149), SMARCA4 @ 27 (4.004652833), H3C13 @ 28 (3.995298939), H3C12 @ 30 (3.990523587), HDAC2 @ 31 (3.989763953), SRC @ 32 (3.98269232), H2AX @ 33 (3.9…
PLCG1	73	3.81339	ERBB3 @ 1 (5), INSR @ 10 (4.567054143), EGFR @ 18 (4.255273461), GRB2 @ 21 (4.184991908), IGF1R @ 23 (4.061111546), EML4 @ 38 (3.949610242), PIK3CA @ 49 (3.87790566), PIK3R2 @ 57 (3.849769814), ERBB2 @ 67 (3.830356053), NPM1 @ 70 (3.818434018), SRC @ 72 (3.815262485), PIK3CD @ 76 (3.806903236), PIK3CB @ 79 (3.788819698), ERBB4 @ 84 (3.769879596), PIK3R3 @ 88 (3.750814494), SHC1 @ 89 (3.749321692)…	TRAF6	60	3.80254	RPS26 @ 4 (4.467848456), MAPRE1 @ 6 (4.289142824), TP53 @ 7 (4.263878027), EGFR @ 8 (4.259252678), APP @ 20 (4.06357256), NFKB1 @ 24 (4.021122149), SRC @ 32 (3.98269232), RPS27A @ 35 (3.95946954), UBA52 @ 41 (3.930125003), RELA @ 55 (3.832644555), ATM @ 59 (3.803938404), RUNX1 @ 71 (3.759465655), STAT3 @ 75 (3.739433125), BMPR1B @ 76 (3.725317326), NPM1 @ 79 (3.723229211), AKT1 @ 82 (3.716718023)…
PIK3CD	76	3.8069	ERBB3 @ 1 (5), INSR @ 10 (4.567054143), EGFR @ 18 (4.255273461), IGF1R @ 23 (4.061111546), EML4 @ 38 (3.949610242), NRAS @ 41 (3.934319021), KRAS @ 43 (3.922588159), PIK3CA @ 49 (3.87790566), HRAS @ 55 (3.85675947), PIK3R2 @ 57 (3.849769814), ERBB2 @ 67 (3.830356053), SRC @ 72 (3.815262485), PLCG1 @ 73 (3.813392608), PIK3CB @ 79 (3.788819698), ERBB4 @ 84 (3.769879596), PIK3R3 @ 88 (3.750814494), …	GRB2	65	3.77073	ERBB3 @ 2 (4.731127927), EP300 @ 3 (4.566455535), RPS26 @ 4 (4.467848456), TP53 @ 7 (4.263878027), EGFR @ 8 (4.259252678), ELAVL1 @ 12 (4.178507033), KPNA2 @ 16 (4.098579501), APP @ 20 (4.06357256), ERBB4 @ 29 (3.99164713), SRC @ 32 (3.98269232), YWHAE @ 37 (3.946570154), UBA52 @ 41 (3.930125003), ERBB2 @ 53 (3.843354357), MYC @ 56 (3.825986802), AR @ 64 (3.786837043), FGF9 @ 67 (3.766703653), ST…
PIK3CB	79	3.78882	ERBB3 @ 1 (5), INSR @ 10 (4.567054143), EGFR @ 18 (4.255273461), GRB2 @ 21 (4.184991908), IGF1R @ 23 (4.061111546), EML4 @ 38 (3.949610242), NRAS @ 41 (3.934319021), KRAS @ 43 (3.922588159), PIK3CA @ 49 (3.87790566), HRAS @ 55 (3.85675947), PIK3R2 @ 57 (3.849769814), ERBB2 @ 67 (3.830356053), SRC @ 72 (3.815262485), PLCG1 @ 73 (3.813392608), PIK3CD @ 76 (3.806903236), GNB1 @ 80 (3.788808915), ERB…	PRKACA	69	3.76236	GATA4 @ 1 (5), EP300 @ 3 (4.566455535), RPS26 @ 4 (4.467848456), MAPRE1 @ 6 (4.289142824), TP53 @ 7 (4.263878027), EGFR @ 8 (4.259252678), CTNNB1 @ 23 (4.032609254), NFKB1 @ 24 (4.021122149), SRC @ 32 (3.98269232), YWHAE @ 37 (3.946570154), CDK9 @ 40 (3.936164117), JUN @ 42 (3.928420791), HDAC1 @ 45 (3.875037284), SOX9 @ 50 (3.856009024), ERBB2 @ 53 (3.843354357), RELA @ 55 (3.832644555), AR @ 64…
FANCC	83	3.77611	EGFR @ 18 (4.255273461), TP53 @ 29 (4.011818792), CTBP1 @ 34 (3.965358784), CDK1 @ 36 (3.960479767), NRAS @ 41 (3.934319021), CTNNB1 @ 42 (3.926547961), KRAS @ 43 (3.922588159), HSP90AB1 @ 47 (3.89559168), PIK3CA @ 49 (3.87790566), NPM1 @ 70 (3.818434018), SRC @ 72 (3.815262485)	SOX2	70	3.76106	GATA4 @ 1 (5), EP300 @ 3 (4.566455535), EGFR @ 8 (4.259252678), YAP1 @ 15 (4.103703234), CDK1 @ 18 (4.078436677), CTNNB1 @ 23 (4.032609254), SMARCA4 @ 27 (4.004652833), H3C13 @ 28 (3.995298939), H3C12 @ 30 (3.990523587), HDAC2 @ 31 (3.989763953), HDAC1 @ 45 (3.875037284), EZH2 @ 49 (3.859099803), H4C6 @ 52 (3.853376106), MYC @ 56 (3.825986802), RUNX1 @ 71 (3.759465655), STAT3 @ 75 (3.739433125), …
PIK3R3	88	3.75081	ERBB3 @ 1 (5), INSR @ 10 (4.567054143), EGFR @ 18 (4.255273461), GRB2 @ 21 (4.184991908), IGF1R @ 23 (4.061111546), EML4 @ 38 (3.949610242), NRAS @ 41 (3.934319021), KRAS @ 43 (3.922588159), TERF2 @ 48 (3.885006348), PIK3CA @ 49 (3.87790566), HRAS @ 55 (3.85675947), PIK3R2 @ 57 (3.849769814), ERBB2 @ 67 (3.830356053), SRC @ 72 (3.815262485), PLCG1 @ 73 (3.813392608), PIK3CD @ 76 (3.806903236), PI…	STAT1	72	3.75933	EP300 @ 3 (4.566455535), TP53 @ 7 (4.263878027), EGFR @ 8 (4.259252678), CHEK2 @ 10 (4.196264648), BRCA1 @ 14 (4.109727894), YAP1 @ 15 (4.103703234), CTNNB1 @ 23 (4.032609254), NFKB1 @ 24 (4.021122149), SMARCA4 @ 27 (4.004652833), SRC @ 32 (3.98269232), FOXP3 @ 34 (3.966832631), IRF1 @ 39 (3.937384347), JUN @ 42 (3.928420791), HDAC1 @ 45 (3.875037284), ERBB2 @ 53 (3.843354357), RELA @ 55 (3.83264…
SHC1	89	3.74932	ERBB3 @ 1 (5), INSR @ 10 (4.567054143), EGFR @ 18 (4.255273461), GRB2 @ 21 (4.184991908), IGF1R @ 23 (4.061111546), EML4 @ 38 (3.949610242), KRAS @ 43 (3.922588159), HSP90AB1 @ 47 (3.89559168), HRAS @ 55 (3.85675947), PIK3R2 @ 57 (3.849769814), NRG1 @ 59 (3.848289148), ERBB2 @ 67 (3.830356053), CLTC @ 68 (3.829350917), NPM1 @ 70 (3.818434018), SRC @ 72 (3.815262485), PLCG1 @ 73 (3.813392608), ERB…	STAT3	75	3.73943	ERBB3 @ 2 (4.731127927), EP300 @ 3 (4.566455535), TP53 @ 7 (4.263878027), EGFR @ 8 (4.259252678), ELAVL1 @ 12 (4.178507033), BRCA1 @ 14 (4.109727894), APP @ 20 (4.06357256), NFKB1 @ 24 (4.021122149), SMARCA4 @ 27 (4.004652833), HDAC2 @ 31 (3.989763953), SRC @ 32 (3.98269232), FOXP3 @ 34 (3.966832631), IRF1 @ 39 (3.937384347), CDK9 @ 40 (3.936164117), JUN @ 42 (3.928420791), HDAC1 @ 45 (3.87503728…
FOXO1	90	3.74627	CDK2 @ 3 (4.692024128), FSHR @ 6 (4.659420845), INSR @ 10 (4.567054143), IGF1R @ 23 (4.061111546), CDK1 @ 36 (3.960479767), CTNNB1 @ 42 (3.926547961), EP300 @ 44 (3.908165976), PIK3CA @ 49 (3.87790566), POMC @ 56 (3.852283734), SRC @ 72 (3.815262485), YWHAB @ 75 (3.807771122), PIK3CB @ 79 (3.788819698), FHL2 @ 82 (3.784994951), STAT3 @ 92 (3.744179493), INS @ 94 (3.741981928)	NPM1	79	3.72323	EP300 @ 3 (4.566455535), TP53 @ 7 (4.263878027), EGFR @ 8 (4.259252678), BRCA1 @ 14 (4.109727894), KPNA2 @ 16 (4.098579501), CDK1 @ 18 (4.078436677), APP @ 20 (4.06357256), NRF1 @ 22 (4.046253517), NFKB1 @ 24 (4.021122149), SMARCA4 @ 27 (4.004652833), HDAC2 @ 31 (3.989763953), H2AX @ 33 (3.978872976), YWHAE @ 37 (3.946570154), ZBTB16 @ 38 (3.943619187), IRF1 @ 39 (3.937384347), CDK9 @ 40 (3.93616…
APP	91	3.74579	RPS26 @ 4 (4.685311238), TBPL1 @ 9 (4.587803787), RAB35 @ 17 (4.272343404), EGFR @ 18 (4.255273461), KPNA2 @ 20 (4.185288434), GRB2 @ 21 (4.184991908), PAPSS2 @ 22 (4.109209196), IGF1R @ 23 (4.061111546), ETHE1 @ 35 (3.964977825), CDK1 @ 36 (3.960479767), CTNNB1 @ 42 (3.926547961), KRAS @ 43 (3.922588159), POMC @ 56 (3.852283734), PIK3R2 @ 57 (3.849769814), RPS27A @ 64 (3.841632945), NPM1 @ 70 (3…	AKT1	82	3.71672	ERBB3 @ 2 (4.731127927), EP300 @ 3 (4.566455535), TP53 @ 7 (4.263878027), EGFR @ 8 (4.259252678), BRCA1 @ 14 (4.109727894), YAP1 @ 15 (4.103703234), APP @ 20 (4.06357256), CTNNB1 @ 23 (4.032609254), NFKB1 @ 24 (4.021122149), H3C13 @ 28 (3.995298939), H3C12 @ 30 (3.990523587), SRC @ 32 (3.98269232), YWHAE @ 37 (3.946570154), CDK9 @ 40 (3.936164117), JUN @ 42 (3.928420791), HDAC1 @ 45 (3.875037284)…
STAT3	92	3.74418	ERBB3 @ 1 (5), INSR @ 10 (4.567054143), EGFR @ 18 (4.255273461), GRB2 @ 21 (4.184991908), IGF1R @ 23 (4.061111546), TP53 @ 29 (4.011818792), SIN3A @ 33 (3.966211795), EML4 @ 38 (3.949610242), FOXP3 @ 40 (3.94032475), KRAS @ 43 (3.922588159), EP300 @ 44 (3.908165976), MUC1 @ 46 (3.897446897), HSP90AB1 @ 47 (3.89559168), PIK3CA @ 49 (3.87790566), POMC @ 56 (3.852283734), PIK3R2 @ 57 (3.849769814), …	HSP90AA1	87	3.70648	ERBB3 @ 2 (4.731127927), EP300 @ 3 (4.566455535), TP53 @ 7 (4.263878027), EGFR @ 8 (4.259252678), BRCA1 @ 14 (4.109727894), CDK1 @ 18 (4.078436677), APP @ 20 (4.06357256), NRF1 @ 22 (4.046253517), NFKB1 @ 24 (4.021122149), H3C13 @ 28 (3.995298939), ERBB4 @ 29 (3.99164713), H3C12 @ 30 (3.990523587), SRC @ 32 (3.98269232), H2AX @ 33 (3.978872976), RPS27A @ 35 (3.95946954), YWHAE @ 37 (3.946570154),…
PLCG2	98	3.73145	ERBB3 @ 1 (5), EGFR @ 18 (4.255273461), GRB2 @ 21 (4.184991908), IGF1R @ 23 (4.061111546), TP53 @ 29 (4.011818792), EML4 @ 38 (3.949610242), PIK3CA @ 49 (3.87790566), PIK3R2 @ 57 (3.849769814), ERBB2 @ 67 (3.830356053), NPM1 @ 70 (3.818434018), SRC @ 72 (3.815262485), PLCG1 @ 73 (3.813392608), PIK3CD @ 76 (3.806903236), PIK3CB @ 79 (3.788819698), ERBB4 @ 84 (3.769879596), PIK3R3 @ 88 (3.750814494…	PTPN11	103	3.65156	ERBB3 @ 2 (4.731127927), EGFR @ 8 (4.259252678), ELAVL1 @ 12 (4.178507033), CTNNB1 @ 23 (4.032609254), ERBB4 @ 29 (3.99164713), SRC @ 32 (3.98269232), ERBB2 @ 53 (3.843354357), MYC @ 56 (3.825986802), TRAF6 @ 60 (3.802540496), AR @ 64 (3.786837043), GRB2 @ 65 (3.770730971), PRKACA @ 69 (3.762362936), RUNX1 @ 71 (3.759465655), STAT1 @ 72 (3.759329862), STAT3 @ 75 (3.739433125), NPM1 @ 79 (3.723229…
PIK3R1	102	3.70388	ERBB3 @ 1 (5), INSR @ 10 (4.567054143), EGFR @ 18 (4.255273461), GRB2 @ 21 (4.184991908), IGF1R @ 23 (4.061111546), EML4 @ 38 (3.949610242), NRAS @ 41 (3.934319021), CTNNB1 @ 42 (3.926547961), KRAS @ 43 (3.922588159), EP300 @ 44 (3.908165976), PIK3CA @ 49 (3.87790566), HRAS @ 55 (3.85675947), PIK3R2 @ 57 (3.849769814), ERBB2 @ 67 (3.830356053), NPM1 @ 70 (3.818434018), SRC @ 72 (3.815262485), PLC…	FANCC	109	3.62222	TP53 @ 7 (4.263878027), EGFR @ 8 (4.259252678), BRCA1 @ 14 (4.109727894), CDK1 @ 18 (4.078436677), CTNNB1 @ 23 (4.032609254), SRC @ 32 (3.98269232), STAT1 @ 72 (3.759329862), HSP90AB1 @ 77 (3.725182879), NPM1 @ 79 (3.723229211), HSP90AA1 @ 87 (3.706481498)
JAK2	103	3.70216	ERBB3 @ 1 (5), INSR @ 10 (4.567054143), EGFR @ 18 (4.255273461), GRB2 @ 21 (4.184991908), IGF1R @ 23 (4.061111546), EML4 @ 38 (3.949610242), NRAS @ 41 (3.934319021), KRAS @ 43 (3.922588159), HSP90AB1 @ 47 (3.89559168), PIK3CA @ 49 (3.87790566), HRAS @ 55 (3.85675947), PIK3R2 @ 57 (3.849769814), ERBB2 @ 67 (3.830356053), SRC @ 72 (3.815262485), PLCG1 @ 73 (3.813392608), PIK3CD @ 76 (3.806903236), …	SMAD3	119	3.60387	EP300 @ 3 (4.566455535), TP53 @ 7 (4.263878027), BRCA1 @ 14 (4.109727894), YAP1 @ 15 (4.103703234), APP @ 20 (4.06357256), CTNNB1 @ 23 (4.032609254), NFKB1 @ 24 (4.021122149), SMARCA4 @ 27 (4.004652833), SRC @ 32 (3.98269232), FOXP3 @ 34 (3.966832631), ZBTB16 @ 38 (3.943619187), CDK9 @ 40 (3.936164117), JUN @ 42 (3.928420791), HDAC1 @ 45 (3.875037284), CDH1 @ 48 (3.861344958), SOX9 @ 50 (3.856009…
MYC	104	3.70004	CDK2 @ 3 (4.692024128), TBP @ 13 (4.487899762), GTF2B @ 15 (4.432465953), EGFR @ 18 (4.255273461), RUNX1 @ 19 (4.230547681), KPNA2 @ 20 (4.185288434), GRB2 @ 21 (4.184991908), IGF1R @ 23 (4.061111546), CDH1 @ 26 (4.048973937), IKZF1 @ 28 (4.018602888), TP53 @ 29 (4.011818792), YWHAE @ 31 (4.000171791), CTBP1 @ 34 (3.965358784), CDK1 @ 36 (3.960479767), CTNNB1 @ 42 (3.926547961), KRAS @ 43 (3.9225…	CUL1	126	3.59208	TP53 @ 7 (4.263878027), CHEK2 @ 10 (4.196264648), ELAVL1 @ 12 (4.178507033), KPNA2 @ 16 (4.098579501), CTNNB1 @ 23 (4.032609254), NFKB1 @ 24 (4.021122149), HDAC2 @ 31 (3.989763953), RPS27A @ 35 (3.95946954), YWHAE @ 37 (3.946570154), CDK9 @ 40 (3.936164117), UBA52 @ 41 (3.930125003), MDM2 @ 47 (3.863162591), EZH2 @ 49 (3.859099803), MYC @ 56 (3.825986802), TRAF6 @ 60 (3.802540496), DNMT3B @ 66 (3…
JAK1	110	3.66694	ERBB3 @ 1 (5), INSR @ 10 (4.567054143), EGFR @ 18 (4.255273461), GRB2 @ 21 (4.184991908), IGF1R @ 23 (4.061111546), TP53 @ 29 (4.011818792), EML4 @ 38 (3.949610242), NRAS @ 41 (3.934319021), KRAS @ 43 (3.922588159), HSP90AB1 @ 47 (3.89559168), PIK3CA @ 49 (3.87790566), PIK3R2 @ 57 (3.849769814), ERBB2 @ 67 (3.830356053), NPM1 @ 70 (3.818434018), PLCG1 @ 73 (3.813392608), PIK3CD @ 76 (3.806903236)…	KRAS	128	3.58216	ERBB3 @ 2 (4.731127927), EP300 @ 3 (4.566455535), EGFR @ 8 (4.259252678), ELAVL1 @ 12 (4.178507033), CDK1 @ 18 (4.078436677), APP @ 20 (4.06357256), CTNNB1 @ 23 (4.032609254), NFKB1 @ 24 (4.021122149), ERBB4 @ 29 (3.99164713), SRC @ 32 (3.98269232), HDAC1 @ 45 (3.875037284), CDH1 @ 48 (3.861344958), ERBB2 @ 53 (3.843354357), MYC @ 56 (3.825986802), ATM @ 59 (3.803938404), SIRT1 @ 61 (3.802094612)…
AKT1	111	3.65746	ERBB3 @ 1 (5), CDK2 @ 3 (4.692024128), YAP1 @ 8 (4.590383402), GTF2B @ 15 (4.432465953), EGFR @ 18 (4.255273461), GRB2 @ 21 (4.184991908), CDH1 @ 26 (4.048973937), TP53 @ 29 (4.011818792), YWHAE @ 31 (4.000171791), CTBP1 @ 34 (3.965358784), NRAS @ 41 (3.934319021), CTNNB1 @ 42 (3.926547961), KRAS @ 43 (3.922588159), EP300 @ 44 (3.908165976), GRK2 @ 45 (3.906377942), HSP90AB1 @ 47 (3.89559168), PI…	SQSTM1	131	3.57558	GATA4 @ 1 (5), TP53 @ 7 (4.263878027), CDK1 @ 18 (4.078436677), NFKB1 @ 24 (4.021122149), RPS27A @ 35 (3.95946954), CDK9 @ 40 (3.936164117), UBA52 @ 41 (3.930125003), RELA @ 55 (3.832644555), MYC @ 56 (3.825986802), ATM @ 59 (3.803938404), TRAF6 @ 60 (3.802540496), BMPR1B @ 76 (3.725317326), NPM1 @ 79 (3.723229211), KEAP1 @ 83 (3.711971154), RAD51 @ 85 (3.708628165)
RELA	118	3.63481	YAP1 @ 8 (4.590383402), TBP @ 13 (4.487899762), GTF2B @ 15 (4.432465953), EGFR @ 18 (4.255273461), KPNA2 @ 20 (4.185288434), TP53 @ 29 (4.011818792), SIN3A @ 33 (3.966211795), ETHE1 @ 35 (3.964977825), FOXP3 @ 40 (3.94032475), CTNNB1 @ 42 (3.926547961), EP300 @ 44 (3.908165976), MUC1 @ 46 (3.897446897), HSP90AB1 @ 47 (3.89559168), RPS27A @ 64 (3.841632945), CLTC @ 68 (3.829350917), NPM1 @ 70 (3.8…	FOS	134	3.55783	GATA4 @ 1 (5), EP300 @ 3 (4.566455535), TP53 @ 7 (4.263878027), EGFR @ 8 (4.259252678), CHEK2 @ 10 (4.196264648), APP @ 20 (4.06357256), CTNNB1 @ 23 (4.032609254), NFKB1 @ 24 (4.021122149), H3C13 @ 28 (3.995298939), H3C12 @ 30 (3.990523587), HDAC2 @ 31 (3.989763953), SRC @ 32 (3.98269232), IRF1 @ 39 (3.937384347), JUN @ 42 (3.928420791), HDAC1 @ 45 (3.875037284), MDM2 @ 47 (3.863162591), H4C6 @ 5…
HSP90AA1	125	3.589	ERBB3 @ 1 (5), CDK2 @ 3 (4.692024128), EGFR @ 18 (4.255273461), GRB2 @ 21 (4.184991908), IGF1R @ 23 (4.061111546), CDH1 @ 26 (4.048973937), TP53 @ 29 (4.011818792), YWHAE @ 31 (4.000171791), SIN3A @ 33 (3.966211795), CDK1 @ 36 (3.960479767), NRAS @ 41 (3.934319021), KRAS @ 43 (3.922588159), EP300 @ 44 (3.908165976), GRK2 @ 45 (3.906377942), MUC1 @ 46 (3.897446897), HSP90AB1 @ 47 (3.89559168), TER…	YWHAZ	139	3.553	MAPRE1 @ 6 (4.289142824), TP53 @ 7 (4.263878027), EGFR @ 8 (4.259252678), BRCA1 @ 14 (4.109727894), YAP1 @ 15 (4.103703234), APP @ 20 (4.06357256), NRF1 @ 22 (4.046253517), CTNNB1 @ 23 (4.032609254), PNKP @ 26 (4.016412119), SMARCA4 @ 27 (4.004652833), H3C12 @ 30 (3.990523587), H2AX @ 33 (3.978872976), YWHAE @ 37 (3.946570154), JUN @ 42 (3.928420791), ERBB2 @ 53 (3.843354357), H3-3B @ 54 (3.83382…
JUN	131	3.57286	CDK2 @ 3 (4.692024128), RPS26 @ 4 (4.685311238), YAP1 @ 8 (4.590383402), TBP @ 13 (4.487899762), GTF2B @ 15 (4.432465953), EGFR @ 18 (4.255273461), RUNX1 @ 19 (4.230547681), KPNA2 @ 20 (4.185288434), TP53 @ 29 (4.011818792), YWHAE @ 31 (4.000171791), CDK1 @ 36 (3.960479767), CTNNB1 @ 42 (3.926547961), EP300 @ 44 (3.908165976), MUC1 @ 46 (3.897446897), HSP90AB1 @ 47 (3.89559168), TERF2 @ 48 (3.885…	FN1	145	3.53872	EP300 @ 3 (4.566455535), RPS26 @ 4 (4.467848456), MAPRE1 @ 6 (4.289142824), EGFR @ 8 (4.259252678), ELAVL1 @ 12 (4.178507033), KPNA2 @ 16 (4.098579501), CDK1 @ 18 (4.078436677), APP @ 20 (4.06357256), CTNNB1 @ 23 (4.032609254), SRC @ 32 (3.98269232), RPS27A @ 35 (3.95946954), YWHAE @ 37 (3.946570154), RAB35 @ 44 (3.880783612), HDAC1 @ 45 (3.875037284), CDH1 @ 48 (3.861344958), MYC @ 56 (3.8259868…
FGF2	132	3.57201	ERBB3 @ 1 (5), INSR @ 10 (4.567054143), EGFR @ 18 (4.255273461), IGF1R @ 23 (4.061111546), KRAS @ 43 (3.922588159), PIK3CA @ 49 (3.87790566), DCN @ 53 (3.863807295), POMC @ 56 (3.852283734), ERBB2 @ 67 (3.830356053), ERBB4 @ 84 (3.769879596), STAT3 @ 92 (3.744179493)	MAPK3	153	3.52728	GATA4 @ 1 (5), TP53 @ 7 (4.263878027), EGFR @ 8 (4.259252678), BRCA1 @ 14 (4.109727894), CDK1 @ 18 (4.078436677), APP @ 20 (4.06357256), NFKB1 @ 24 (4.021122149), SRC @ 32 (3.98269232), CDK9 @ 40 (3.936164117), JUN @ 42 (3.928420791), CDH1 @ 48 (3.861344958), MYC @ 56 (3.825986802), AR @ 64 (3.786837043), GRB2 @ 65 (3.770730971), FGF9 @ 67 (3.766703653), PRKACA @ 69 (3.762362936), RUNX1 @ 71 (3.7…
SMAD3	133	3.56869	CDK2 @ 3 (4.692024128), YAP1 @ 8 (4.590383402), RUNX1 @ 19 (4.230547681), GRB2 @ 21 (4.184991908), CDH1 @ 26 (4.048973937), TP53 @ 29 (4.011818792), SIN3A @ 33 (3.966211795), FOXP3 @ 40 (3.94032475), CTNNB1 @ 42 (3.926547961), EP300 @ 44 (3.908165976), PIK3CA @ 49 (3.87790566), SRC @ 72 (3.815262485), FHL2 @ 82 (3.784994951), LEF1 @ 87 (3.764766052), FOXO1 @ 90 (3.74627242), APP @ 91 (3.745785722…	FANCM	155	3.52219	CHEK2 @ 10 (4.196264648), BRCA1 @ 14 (4.109727894), APP @ 20 (4.06357256), MYC @ 56 (3.825986802), FEN1 @ 57 (3.81699797), ERCC6 @ 63 (3.791796078), RAD51 @ 85 (3.708628165), RAD51C @ 92 (3.688085298)
RANBP2	144	3.54562	KPNA2 @ 20 (4.185288434), TP53 @ 29 (4.011818792), CDK1 @ 36 (3.960479767), EML4 @ 38 (3.949610242), CTNNB1 @ 42 (3.926547961), ERBB2 @ 67 (3.830356053), CLTC @ 68 (3.829350917), NPM1 @ 70 (3.818434018)	UBB	156	3.51912	TP53 @ 7 (4.263878027), EGFR @ 8 (4.259252678), BRCA1 @ 14 (4.109727894), APP @ 20 (4.06357256), CTNNB1 @ 23 (4.032609254), H3C13 @ 28 (3.995298939), H3C12 @ 30 (3.990523587), SRC @ 32 (3.98269232), H2AX @ 33 (3.978872976), RPS27A @ 35 (3.95946954), UBA52 @ 41 (3.930125003), JUN @ 42 (3.928420791), MDM2 @ 47 (3.863162591), EZH2 @ 49 (3.859099803), H4C6 @ 52 (3.853376106), ERBB2 @ 53 (3.843354357)…
H3C13	146	3.54292	TBP @ 13 (4.487899762), GTF2A2 @ 14 (4.450875194), GTF2B @ 15 (4.432465953), RUNX1 @ 19 (4.230547681), SIN3A @ 33 (3.966211795), CDK1 @ 36 (3.960479767), CTNNB1 @ 42 (3.926547961), EP300 @ 44 (3.908165976), HSP90AB1 @ 47 (3.89559168), UBA52 @ 58 (3.849143067), CBX5 @ 60 (3.848006823), RPS27A @ 64 (3.841632945)	GATA3	162	3.51411	EP300 @ 3 (4.566455535), TP53 @ 7 (4.263878027), BRCA1 @ 14 (4.109727894), KPNA2 @ 16 (4.098579501), NFKB1 @ 24 (4.021122149), H3C13 @ 28 (3.995298939), H3C12 @ 30 (3.990523587), HDAC2 @ 31 (3.989763953), FOXP3 @ 34 (3.966832631), ZBTB16 @ 38 (3.943619187), JUN @ 42 (3.928420791), HDAC1 @ 45 (3.875037284), MDM2 @ 47 (3.863162591), H3-3B @ 54 (3.833825465), AR @ 64 (3.786837043), PRKACA @ 69 (3.76…
UBB	159	3.52083	CDK2 @ 3 (4.692024128), FSHR @ 6 (4.659420845), EGFR @ 18 (4.255273461), GRB2 @ 21 (4.184991908), TP53 @ 29 (4.011818792), CTNNB1 @ 42 (3.926547961), HRAS @ 55 (3.85675947), UBA52 @ 58 (3.849143067), RPS27A @ 64 (3.841632945), ERBB2 @ 67 (3.830356053), SRC @ 72 (3.815262485), APP @ 91 (3.745785722)	ELOB	164	3.51049	AFF4 @ 17 (4.098010313), NRF1 @ 22 (4.046253517), SMARCA4 @ 27 (4.004652833), CDK9 @ 40 (3.936164117), UBA52 @ 41 (3.930125003), JUN @ 42 (3.928420791), ERCC6 @ 63 (3.791796078)
CANX	161	3.51756	ERBB3 @ 1 (5), CDK2 @ 3 (4.692024128), FSHR @ 6 (4.659420845), LHCGR @ 7 (4.604929351), EGFR @ 18 (4.255273461), CDK1 @ 36 (3.960479767), HSP90AB1 @ 47 (3.89559168), ERBB2 @ 67 (3.830356053)	PIK3CA	169	3.49722	ERBB3 @ 2 (4.731127927), TP53 @ 7 (4.263878027), EGFR @ 8 (4.259252678), CTNNB1 @ 23 (4.032609254), ERBB4 @ 29 (3.99164713), SRC @ 32 (3.98269232), HDAC1 @ 45 (3.875037284), ERBB2 @ 53 (3.843354357), MYC @ 56 (3.825986802), TRAF6 @ 60 (3.802540496), GRB2 @ 65 (3.770730971), STAT1 @ 72 (3.759329862), STAT3 @ 75 (3.739433125), NPM1 @ 79 (3.723229211), AKT1 @ 82 (3.716718023), HSP90AA1 @ 87 (3.70648…
PTPN11	164	3.51056	ERBB3 @ 1 (5), INSR @ 10 (4.567054143), EGFR @ 18 (4.255273461), RUNX1 @ 19 (4.230547681), GRB2 @ 21 (4.184991908), IGF1R @ 23 (4.061111546), NRAS @ 41 (3.934319021), CTNNB1 @ 42 (3.926547961), KRAS @ 43 (3.922588159), PIK3CA @ 49 (3.87790566), HRAS @ 55 (3.85675947), PIK3R2 @ 57 (3.849769814), ERBB2 @ 67 (3.830356053), NPM1 @ 70 (3.818434018), SRC @ 72 (3.815262485), PLCG1 @ 73 (3.813392608), PI…	ELOC	181	3.47696	AFF4 @ 17 (4.098010313), SMARCA4 @ 27 (4.004652833), RPS27A @ 35 (3.95946954), CDK9 @ 40 (3.936164117), TRAF6 @ 60 (3.802540496), ERCC6 @ 63 (3.791796078)
HGF	168	3.49998	ERBB3 @ 1 (5), INSR @ 10 (4.567054143), EGFR @ 18 (4.255273461), GRB2 @ 21 (4.184991908), IGF1R @ 23 (4.061111546), KRAS @ 43 (3.922588159), ERBB2 @ 67 (3.830356053), SRC @ 72 (3.815262485), ERBB4 @ 84 (3.769879596), SHC1 @ 89 (3.749321692), STAT3 @ 92 (3.744179493)	MAPK1	183	3.46544	GATA4 @ 1 (5), EP300 @ 3 (4.566455535), TP53 @ 7 (4.263878027), EGFR @ 8 (4.259252678), BRCA1 @ 14 (4.109727894), APP @ 20 (4.06357256), NFKB1 @ 24 (4.021122149), SRC @ 32 (3.98269232), JUN @ 42 (3.928420791), MDM2 @ 47 (3.863162591), RELA @ 55 (3.832644555), MYC @ 56 (3.825986802), AR @ 64 (3.786837043), GRB2 @ 65 (3.770730971), PRKACA @ 69 (3.762362936), RUNX1 @ 71 (3.759465655), STAT1 @ 72 (3.…
FN1	171	3.49712	RPS26 @ 4 (4.685311238), RAB35 @ 17 (4.272343404), EGFR @ 18 (4.255273461), KPNA2 @ 20 (4.185288434), GRB2 @ 21 (4.184991908), CDH1 @ 26 (4.048973937), YWHAE @ 31 (4.000171791), CDK1 @ 36 (3.960479767), CTNNB1 @ 42 (3.926547961), KRAS @ 43 (3.922588159), EP300 @ 44 (3.908165976), HSP90AB1 @ 47 (3.89559168), DCN @ 53 (3.863807295), HRAS @ 55 (3.85675947), RPS27A @ 64 (3.841632945), CLTC @ 68 (3.82…	H3C14	184	3.4629	H3C13 @ 28 (3.995298939), H3C12 @ 30 (3.990523587), H2AX @ 33 (3.978872976), RPS27A @ 35 (3.95946954), UBA52 @ 41 (3.930125003), EZH2 @ 49 (3.859099803), H4C6 @ 52 (3.853376106), H3-3B @ 54 (3.833825465), DNMT3B @ 66 (3.768542304), SOX2 @ 70 (3.761055665), TP53BP1 @ 78 (3.725074195), MED1 @ 84 (3.711224374), H3-4 @ 88 (3.699941274)
IRS1	178	3.4872	ERBB3 @ 1 (5), INSR @ 10 (4.567054143), EGFR @ 18 (4.255273461), GRB2 @ 21 (4.184991908), IGF1R @ 23 (4.061111546), CDH1 @ 26 (4.048973937), TP53 @ 29 (4.011818792), YWHAE @ 31 (4.000171791), PIK3CA @ 49 (3.87790566), PIK3R2 @ 57 (3.849769814), ERBB2 @ 67 (3.830356053), NPM1 @ 70 (3.818434018), SRC @ 72 (3.815262485), YWHAB @ 75 (3.807771122), PIK3CD @ 76 (3.806903236), PIK3CB @ 79 (3.788819698),…	DHX9	186	3.46083	RPS26 @ 4 (4.467848456), EGFR @ 8 (4.259252678), ELAVL1 @ 12 (4.178507033), BRCA1 @ 14 (4.109727894), RAB5B @ 21 (4.053134222), NRF1 @ 22 (4.046253517), CTNNB1 @ 23 (4.032609254), H2AX @ 33 (3.978872976), JUN @ 42 (3.928420791), NR0B1 @ 46 (3.864347127), MDM2 @ 47 (3.863162591), EZH2 @ 49 (3.859099803), RELA @ 55 (3.832644555), TRAF6 @ 60 (3.802540496), GRB2 @ 65 (3.770730971), XRCC6 @ 80 (3.7185…
SUMO1	179	3.48633	YAP1 @ 8 (4.590383402), IGF1R @ 23 (4.061111546), GNAS @ 27 (4.026244404), TP53 @ 29 (4.011818792), SIN3A @ 33 (3.966211795), CTNNB1 @ 42 (3.926547961), EP300 @ 44 (3.908165976), HSP90AB1 @ 47 (3.89559168), CLTC @ 68 (3.829350917), NPM1 @ 70 (3.818434018), APP @ 91 (3.745785722)	PPP2CA	190	3.4536	TP53 @ 7 (4.263878027), EGFR @ 8 (4.259252678), CHEK2 @ 10 (4.196264648), BRCA1 @ 14 (4.109727894), YAP1 @ 15 (4.103703234), CDK1 @ 18 (4.078436677), NRF1 @ 22 (4.046253517), CTNNB1 @ 23 (4.032609254), NFKB1 @ 24 (4.021122149), SRC @ 32 (3.98269232), H2AX @ 33 (3.978872976), ERBB2 @ 53 (3.843354357), RELA @ 55 (3.832644555), MYC @ 56 (3.825986802), BMPR1B @ 76 (3.725317326), NPM1 @ 79 (3.72322921…
PRKACA	197	3.45831	RPS26 @ 4 (4.685311238), EGFR @ 18 (4.255273461), IGF1R @ 23 (4.061111546), GNAS @ 27 (4.026244404), TP53 @ 29 (4.011818792), YWHAE @ 31 (4.000171791), CTNNB1 @ 42 (3.926547961), EP300 @ 44 (3.908165976), GRK2 @ 45 (3.906377942), HSP90AB1 @ 47 (3.89559168), ERBB2 @ 67 (3.830356053), CLTC @ 68 (3.829350917), NPM1 @ 70 (3.818434018), SRC @ 72 (3.815262485), PLCG1 @ 73 (3.813392608), GNB1 @ 80 (3.78…	NRAS	193	3.44843	ERBB3 @ 2 (4.731127927), EGFR @ 8 (4.259252678), ELAVL1 @ 12 (4.178507033), CTNNB1 @ 23 (4.032609254), NFKB1 @ 24 (4.021122149), ERBB4 @ 29 (3.99164713), HDAC2 @ 31 (3.989763953), SRC @ 32 (3.98269232), EZH2 @ 49 (3.859099803), ERBB2 @ 53 (3.843354357), GRB2 @ 65 (3.770730971), RUNX1 @ 71 (3.759465655), NPM1 @ 79 (3.723229211), AKT1 @ 82 (3.716718023), HSP90AA1 @ 87 (3.706481498), YWHAB @ 93 (3.6…
NFKBIA	213	3.42399	IKZF4 @ 2 (4.998117848), INSR @ 10 (4.567054143), TP53 @ 29 (4.011818792), EP300 @ 44 (3.908165976), UBA52 @ 58 (3.849143067), RPS27A @ 64 (3.841632945), CLTC @ 68 (3.829350917), SRC @ 72 (3.815262485), STAT3 @ 92 (3.744179493)	RBX1	195	3.44212	TP53 @ 7 (4.263878027), ELAVL1 @ 12 (4.178507033), BRCA1 @ 14 (4.109727894), APP @ 20 (4.06357256), NRF1 @ 22 (4.046253517), CTNNB1 @ 23 (4.032609254), RPS27A @ 35 (3.95946954), UBA52 @ 41 (3.930125003), EZH2 @ 49 (3.859099803), ERCC6 @ 63 (3.791796078), KEAP1 @ 83 (3.711971154), CDK2 @ 89 (3.699623682)
CBL	217	3.41555	ERBB3 @ 1 (5), INSR @ 10 (4.567054143), EGFR @ 18 (4.255273461), GRB2 @ 21 (4.184991908), IGF1R @ 23 (4.061111546), YWHAE @ 31 (4.000171791), CTNNB1 @ 42 (3.926547961), PIK3CA @ 49 (3.87790566), HRAS @ 55 (3.85675947), PIK3R2 @ 57 (3.849769814), UBA52 @ 58 (3.849143067), RPS27A @ 64 (3.841632945), ERBB2 @ 67 (3.830356053), SRC @ 72 (3.815262485), PLCG1 @ 73 (3.813392608), YWHAB @ 75 (3.807771122)…	H3C15	203	3.42932	H3C13 @ 28 (3.995298939), H3C12 @ 30 (3.990523587), RPS27A @ 35 (3.95946954), UBA52 @ 41 (3.930125003), EZH2 @ 49 (3.859099803), H4C6 @ 52 (3.853376106), H3-3B @ 54 (3.833825465), DNMT3B @ 66 (3.768542304), SOX2 @ 70 (3.761055665), TP53BP1 @ 78 (3.725074195), MED1 @ 84 (3.711224374), H3-4 @ 88 (3.699941274)
H3C12	220	3.40839	TBP @ 13 (4.487899762), RUNX1 @ 19 (4.230547681), TP53 @ 29 (4.011818792), SIN3A @ 33 (3.966211795), CDK1 @ 36 (3.960479767), CTNNB1 @ 42 (3.926547961), EP300 @ 44 (3.908165976), HSP90AB1 @ 47 (3.89559168), UBA52 @ 58 (3.849143067), CBX5 @ 60 (3.848006823), RPS27A @ 64 (3.841632945)	H3C1	205	3.4246	EP300 @ 3 (4.566455535), TP53 @ 7 (4.263878027), EGFR @ 8 (4.259252678), SMARCA4 @ 27 (4.004652833), H3C13 @ 28 (3.995298939), H3C12 @ 30 (3.990523587), HDAC2 @ 31 (3.989763953), H2AX @ 33 (3.978872976), RPS27A @ 35 (3.95946954), YWHAE @ 37 (3.946570154), IRF1 @ 39 (3.937384347), UBA52 @ 41 (3.930125003), HDAC1 @ 45 (3.875037284), EZH2 @ 49 (3.859099803), H4C6 @ 52 (3.853376106), H3-3B @ 54 (3.83…
JAK3	229	3.38901	ERBB3 @ 1 (5), GTF2B @ 15 (4.432465953), EGFR @ 18 (4.255273461), GNAS @ 27 (4.026244404), CDK1 @ 36 (3.960479767), EML4 @ 38 (3.949610242), NRAS @ 41 (3.934319021), KRAS @ 43 (3.922588159), PIK3CA @ 49 (3.87790566), HRAS @ 55 (3.85675947), PIK3R2 @ 57 (3.849769814), ERBB2 @ 67 (3.830356053), PIK3CD @ 76 (3.806903236), PIK3CB @ 79 (3.788819698), PIK3R3 @ 88 (3.750814494), SHC1 @ 89 (3.749321692),…	UBC	207	3.42372	EP300 @ 3 (4.566455535), TP53 @ 7 (4.263878027), EGFR @ 8 (4.259252678), BRCA1 @ 14 (4.109727894), H3C13 @ 28 (3.995298939), H3C12 @ 30 (3.990523587), H2AX @ 33 (3.978872976), RPS27A @ 35 (3.95946954), UBA52 @ 41 (3.930125003), MDM2 @ 47 (3.863162591), H4C6 @ 52 (3.853376106), RELA @ 55 (3.832644555), ATM @ 59 (3.803938404), TRAF6 @ 60 (3.802540496), ERCC6 @ 63 (3.791796078), HSP90AB1 @ 77 (3.725…
STAT1	237	3.37544	YAP1 @ 8 (4.590383402), EGFR @ 18 (4.255273461), GRB2 @ 21 (4.184991908), TP53 @ 29 (4.011818792), FOXP3 @ 40 (3.94032475), CTNNB1 @ 42 (3.926547961), EP300 @ 44 (3.908165976), HSP90AB1 @ 47 (3.89559168), PIK3CA @ 49 (3.87790566), ERBB2 @ 67 (3.830356053), SRC @ 72 (3.815262485), FANCC @ 83 (3.776114382), STAT3 @ 92 (3.744179493)	PIK3R1	212	3.41946	ERBB3 @ 2 (4.731127927), EP300 @ 3 (4.566455535), EGFR @ 8 (4.259252678), LIG3 @ 13 (4.116238444), BRCA1 @ 14 (4.109727894), CTNNB1 @ 23 (4.032609254), ERBB4 @ 29 (3.99164713), SRC @ 32 (3.98269232), HDAC1 @ 45 (3.875037284), ERBB2 @ 53 (3.843354357), SIRT1 @ 61 (3.802094612), AR @ 64 (3.786837043), GRB2 @ 65 (3.770730971), PRKACA @ 69 (3.762362936), STAT1 @ 72 (3.759329862), STAT3 @ 75 (3.739433…
NFKB1	246	3.35423	EGFR @ 18 (4.255273461), KPNA2 @ 20 (4.185288434), GNAS @ 27 (4.026244404), TP53 @ 29 (4.011818792), SIN3A @ 33 (3.966211795), CDK1 @ 36 (3.960479767), FOXP3 @ 40 (3.94032475), NRAS @ 41 (3.934319021), CTNNB1 @ 42 (3.926547961), KRAS @ 43 (3.922588159), EP300 @ 44 (3.908165976), HSP90AB1 @ 47 (3.89559168), HRAS @ 55 (3.85675947), UBA52 @ 58 (3.849143067), ERBB2 @ 67 (3.830356053), CLTC @ 68 (3.82…	JAK1	225	3.39043	ERBB3 @ 2 (4.731127927), TP53 @ 7 (4.263878027), EGFR @ 8 (4.259252678), BRCA1 @ 14 (4.109727894), IRF1 @ 39 (3.937384347), MDM2 @ 47 (3.863162591), ERBB2 @ 53 (3.843354357), SIRT1 @ 61 (3.802094612), GRB2 @ 65 (3.770730971), STAT1 @ 72 (3.759329862), STAT3 @ 75 (3.739433125), HSP90AB1 @ 77 (3.725182879), NPM1 @ 79 (3.723229211), HSP90AA1 @ 87 (3.706481498), H3-4 @ 88 (3.699941274)
YWHAZ	255	3.33485	CDK2 @ 3 (4.692024128), YAP1 @ 8 (4.590383402), TBP @ 13 (4.487899762), EGFR @ 18 (4.255273461), GRB2 @ 21 (4.184991908), IGF1R @ 23 (4.061111546), TP53 @ 29 (4.011818792), YWHAE @ 31 (4.000171791), CTNNB1 @ 42 (3.926547961), HSP90AB1 @ 47 (3.89559168), PIK3CA @ 49 (3.87790566), ERBB2 @ 67 (3.830356053), CLTC @ 68 (3.829350917), NPM1 @ 70 (3.818434018), MADD @ 74 (3.812266803), YWHAB @ 75 (3.8077…	FYN	227	3.38114	MAPRE1 @ 6 (4.289142824), EGFR @ 8 (4.259252678), XRCC1 @ 9 (4.232647006), CDK1 @ 18 (4.078436677), APP @ 20 (4.06357256), CTNNB1 @ 23 (4.032609254), SRC @ 32 (3.98269232), CDH1 @ 48 (3.861344958), ERBB2 @ 53 (3.843354357), TRAF6 @ 60 (3.802540496), GRB2 @ 65 (3.770730971), PRKACA @ 69 (3.762362936), STAT1 @ 72 (3.759329862), STAT3 @ 75 (3.739433125), HSP90AB1 @ 77 (3.725182879), AKT1 @ 82 (3.716…
MAPK3	257	3.3318	CDK2 @ 3 (4.692024128), INSR @ 10 (4.567054143), EGFR @ 18 (4.255273461), RUNX1 @ 19 (4.230547681), GRB2 @ 21 (4.184991908), CDH1 @ 26 (4.048973937), TP53 @ 29 (4.011818792), CDK1 @ 36 (3.960479767), NRAS @ 41 (3.934319021), KRAS @ 43 (3.922588159), GRK2 @ 45 (3.906377942), HSP90AB1 @ 47 (3.89559168), HRAS @ 55 (3.85675947), SRC @ 72 (3.815262485), PLCG1 @ 73 (3.813392608), GNB1 @ 80 (3.788808915…	JAK2	228	3.38077	ERBB3 @ 2 (4.731127927), EGFR @ 8 (4.259252678), CHEK2 @ 10 (4.196264648), BRCA1 @ 14 (4.109727894), NRF1 @ 22 (4.046253517), SRC @ 32 (3.98269232), EZH2 @ 49 (3.859099803), ERBB2 @ 53 (3.843354357), TRAF6 @ 60 (3.802540496), GRB2 @ 65 (3.770730971), PRKACA @ 69 (3.762362936), STAT1 @ 72 (3.759329862), STAT3 @ 75 (3.739433125), HSP90AB1 @ 77 (3.725182879), HSP90AA1 @ 87 (3.706481498), H3-4 @ 88 (…
DHX9	267	3.31499	CDK2 @ 3 (4.692024128), RPS26 @ 4 (4.685311238), TBP @ 13 (4.487899762), GTF2B @ 15 (4.432465953), EGFR @ 18 (4.255273461), GRB2 @ 21 (4.184991908), CTNNB1 @ 42 (3.926547961), RAB5B @ 78 (3.79689129)	TRAF2	231	3.37927	EP300 @ 3 (4.566455535), EGFR @ 8 (4.259252678), AFF4 @ 17 (4.098010313), NRF1 @ 22 (4.046253517), NFKB1 @ 24 (4.021122149), RPS27A @ 35 (3.95946954), ZBTB16 @ 38 (3.943619187), CDK9 @ 40 (3.936164117), UBA52 @ 41 (3.930125003), JUN @ 42 (3.928420791), SOX9 @ 50 (3.856009024), RELA @ 55 (3.832644555), TRAF6 @ 60 (3.802540496), HSP90AB1 @ 77 (3.725182879), HSP90AA1 @ 87 (3.706481498), CLTC @ 98 (3…
SOS1	286	3.28749	ERBB3 @ 1 (5), INSR @ 10 (4.567054143), EGFR @ 18 (4.255273461), GRB2 @ 21 (4.184991908), IGF1R @ 23 (4.061111546), NRAS @ 41 (3.934319021), KRAS @ 43 (3.922588159), MUC1 @ 46 (3.897446897), PIK3CA @ 49 (3.87790566), HRAS @ 55 (3.85675947), PIK3R2 @ 57 (3.849769814), NRG1 @ 59 (3.848289148), ERBB2 @ 67 (3.830356053), SRC @ 72 (3.815262485), PLCG1 @ 73 (3.813392608), PIK3CB @ 79 (3.788819698), SHC…	HRAS	233	3.37856	ERBB3 @ 2 (4.731127927), TP53 @ 7 (4.263878027), EGFR @ 8 (4.259252678), NRF1 @ 22 (4.046253517), CTNNB1 @ 23 (4.032609254), NFKB1 @ 24 (4.021122149), ERBB4 @ 29 (3.99164713), HDAC2 @ 31 (3.989763953), SRC @ 32 (3.98269232), JUN @ 42 (3.928420791), CDH1 @ 48 (3.861344958), ERBB2 @ 53 (3.843354357), MYC @ 56 (3.825986802), SIRT1 @ 61 (3.802094612), GRB2 @ 65 (3.770730971), AKT1 @ 82 (3.716718023),…
AKT2	288	3.28194	FSHR @ 6 (4.659420845), TP53 @ 29 (4.011818792), CTNNB1 @ 42 (3.926547961), HSP90AB1 @ 47 (3.89559168), PIK3CA @ 49 (3.87790566), PIK3R2 @ 57 (3.849769814), SRC @ 72 (3.815262485), PIK3CD @ 76 (3.806903236), PIK3CB @ 79 (3.788819698), PIK3R3 @ 88 (3.750814494), FOXO1 @ 90 (3.74627242), APP @ 91 (3.745785722), INS @ 94 (3.741981928)	CD4	234	3.37571	CTNNB1 @ 23 (4.032609254), NFKB1 @ 24 (4.021122149), SRC @ 32 (3.98269232), FOXP3 @ 34 (3.966832631), STAT1 @ 72 (3.759329862), STAT3 @ 75 (3.739433125), HSP90AB1 @ 77 (3.725182879), NPM1 @ 79 (3.723229211), AKT1 @ 82 (3.716718023), HSP90AA1 @ 87 (3.706481498)
TUBA4A	290	3.27947	ERBB3 @ 1 (5), EGFR @ 18 (4.255273461), GRB2 @ 21 (4.184991908), RPS27A @ 64 (3.841632945), GPHN @ 95 (3.735885107)	SUMO1	243	3.35975	EP300 @ 3 (4.566455535), TP53 @ 7 (4.263878027), XRCC1 @ 9 (4.232647006), ELAVL1 @ 12 (4.178507033), BRCA1 @ 14 (4.109727894), YAP1 @ 15 (4.103703234), APP @ 20 (4.06357256), CTNNB1 @ 23 (4.032609254), NFKB1 @ 24 (4.021122149), SMARCA4 @ 27 (4.004652833), HDAC2 @ 31 (3.989763953), ZBTB16 @ 38 (3.943619187), JUN @ 42 (3.928420791), HDAC1 @ 45 (3.875037284), MDM2 @ 47 (3.863162591), H4C6 @ 52 (3.85…
CDKN1B	291	3.2792	CDK2 @ 3 (4.692024128), KPNA2 @ 20 (4.185288434), GRB2 @ 21 (4.184991908), IGF1R @ 23 (4.061111546), TP53 @ 29 (4.011818792), YWHAE @ 31 (4.000171791), CDK1 @ 36 (3.960479767), UBA52 @ 58 (3.849143067), RPS27A @ 64 (3.841632945), SRC @ 72 (3.815262485), YWHAB @ 75 (3.807771122), FOXO1 @ 90 (3.74627242)	SKP1	254	3.34383	EP300 @ 3 (4.566455535), TP53 @ 7 (4.263878027), ELAVL1 @ 12 (4.178507033), BRCA1 @ 14 (4.109727894), CTNNB1 @ 23 (4.032609254), RPS27A @ 35 (3.95946954), CDK9 @ 40 (3.936164117), UBA52 @ 41 (3.930125003), MYC @ 56 (3.825986802), HSP90AB1 @ 77 (3.725182879), KEAP1 @ 83 (3.711971154), HSP90AA1 @ 87 (3.706481498), CDK2 @ 89 (3.699623682)
NCK1	302	3.25956	ERBB3 @ 1 (5), EGFR @ 18 (4.255273461), GRB2 @ 21 (4.184991908), PAPSS1 @ 54 (3.85901715), UBA52 @ 58 (3.849143067), NPVF @ 71 (3.816793449), SRC @ 72 (3.815262485), PLCG1 @ 73 (3.813392608), PIK3CD @ 76 (3.806903236), PIK3R3 @ 88 (3.750814494), PLCG2 @ 98 (3.731445794)	MUC1	260	3.34171	ERBB3 @ 2 (4.731127927), TP53 @ 7 (4.263878027), EGFR @ 8 (4.259252678), CTNNB1 @ 23 (4.032609254), ERBB4 @ 29 (3.99164713), SRC @ 32 (3.98269232), JUN @ 42 (3.928420791), ERBB2 @ 53 (3.843354357), RELA @ 55 (3.832644555), GRB2 @ 65 (3.770730971), STAT3 @ 75 (3.739433125), HSP90AA1 @ 87 (3.706481498), ESR1 @ 95 (3.677494751)
CUL1	307	3.25206	CDK2 @ 3 (4.692024128), KPNA2 @ 20 (4.185288434), TP53 @ 29 (4.011818792), YWHAE @ 31 (4.000171791), CTNNB1 @ 42 (3.926547961), HSP90AB1 @ 47 (3.89559168), UBA52 @ 58 (3.849143067), RPS27A @ 64 (3.841632945), CLTC @ 68 (3.829350917), NPM1 @ 70 (3.818434018)	MEF2C	267	3.33522	GATA4 @ 1 (5), EP300 @ 3 (4.566455535), CDK1 @ 18 (4.078436677), CTNNB1 @ 23 (4.032609254), JUN @ 42 (3.928420791), HDAC1 @ 45 (3.875037284), SIRT1 @ 61 (3.802094612), TBX5 @ 74 (3.754866385), AKT1 @ 82 (3.716718023)
CRK	313	3.24255	ERBB3 @ 1 (5), INSR @ 10 (4.567054143), EGFR @ 18 (4.255273461), GRB2 @ 21 (4.184991908), IGF1R @ 23 (4.061111546), TP53 @ 29 (4.011818792), YWHAE @ 31 (4.000171791), HSP90AB1 @ 47 (3.89559168), PIK3CA @ 49 (3.87790566), PIK3R2 @ 57 (3.849769814), ERBB2 @ 67 (3.830356053), SRC @ 72 (3.815262485), PIK3CD @ 76 (3.806903236), PIK3CB @ 79 (3.788819698), ERBB4 @ 84 (3.769879596), PIK3R3 @ 88 (3.750814…	B2M	274	3.32674	ERBB3 @ 2 (4.731127927), APP @ 20 (4.06357256), GRB2 @ 65 (3.770730971), STAT1 @ 72 (3.759329862)
SMARCA4	316	3.23426	RUNX1 @ 19 (4.230547681), KPNA2 @ 20 (4.185288434), IKZF1 @ 28 (4.018602888), TP53 @ 29 (4.011818792), SIN3A @ 33 (3.966211795), CTNNB1 @ 42 (3.926547961), EP300 @ 44 (3.908165976), CBX5 @ 60 (3.848006823), NPM1 @ 70 (3.818434018), LEF1 @ 87 (3.764766052), FOXO1 @ 90 (3.74627242), STAT3 @ 92 (3.744179493), SIN3B @ 96 (3.733086083)	FGF2	283	3.30385	ERBB3 @ 2 (4.731127927), EGFR @ 8 (4.259252678), ERBB4 @ 29 (3.99164713), ERBB2 @ 53 (3.843354357), SOX2 @ 70 (3.761055665), STAT3 @ 75 (3.739433125), AKT1 @ 82 (3.716718023), POU5F1 @ 90 (3.694597021)
RAE1	319	3.23262	ERBB3 @ 1 (5), YAP1 @ 8 (4.590383402), MPST @ 63 (3.844921958)	PIK3CB	291	3.29422	ERBB3 @ 2 (4.731127927), EGFR @ 8 (4.259252678), ERBB4 @ 29 (3.99164713), SRC @ 32 (3.98269232), ERBB2 @ 53 (3.843354357), GRB2 @ 65 (3.770730971), AKT1 @ 82 (3.716718023)
H3C14	320	3.22816	TBP @ 13 (4.487899762), GTF2A2 @ 14 (4.450875194), GTF2B @ 15 (4.432465953), UBA52 @ 58 (3.849143067), CBX5 @ 60 (3.848006823), RPS27A @ 64 (3.841632945)	PLCG1	302	3.28352	ERBB3 @ 2 (4.731127927), EGFR @ 8 (4.259252678), LIG3 @ 13 (4.116238444), NRF1 @ 22 (4.046253517), ERBB4 @ 29 (3.99164713), SRC @ 32 (3.98269232), ERBB2 @ 53 (3.843354357), AR @ 64 (3.786837043), GRB2 @ 65 (3.770730971), PRKACA @ 69 (3.762362936), NPM1 @ 79 (3.723229211), AKT1 @ 82 (3.716718023)
H3C15	325	3.22217	TBP @ 13 (4.487899762), GTF2A2 @ 14 (4.450875194), GTF2B @ 15 (4.432465953), UBA52 @ 58 (3.849143067), CBX5 @ 60 (3.848006823), RPS27A @ 64 (3.841632945)	HLA-B	321	3.27174	RPS26 @ 4 (4.467848456), MAPRE1 @ 6 (4.289142824), SRC @ 32 (3.98269232), STAT1 @ 72 (3.759329862), NPM1 @ 79 (3.723229211), RAB7A @ 91 (3.694059873)
GATA3	342	3.19672	CDK2 @ 3 (4.692024128), RUNX1 @ 19 (4.230547681), KPNA2 @ 20 (4.185288434), IKZF1 @ 28 (4.018602888), TP53 @ 29 (4.011818792), FOXP3 @ 40 (3.94032475), EP300 @ 44 (3.908165976), STAT3 @ 92 (3.744179493)	H3C3	334	3.25596	EP300 @ 3 (4.566455535), TP53 @ 7 (4.263878027), SMARCA4 @ 27 (4.004652833), H3C13 @ 28 (3.995298939), H3C12 @ 30 (3.990523587), H2AX @ 33 (3.978872976), RPS27A @ 35 (3.95946954), UBA52 @ 41 (3.930125003), H4C6 @ 52 (3.853376106), H3-3B @ 54 (3.833825465), DNMT3B @ 66 (3.768542304), SOX2 @ 70 (3.761055665), TP53BP1 @ 78 (3.725074195), H3-4 @ 88 (3.699941274), POU5F1 @ 90 (3.694597021)
CCND1	343	3.19608	CDK2 @ 3 (4.692024128), EGFR @ 18 (4.255273461), RUNX1 @ 19 (4.230547681), CDH1 @ 26 (4.048973937), TP53 @ 29 (4.011818792), CDK1 @ 36 (3.960479767), NRAS @ 41 (3.934319021), CTNNB1 @ 42 (3.926547961), KRAS @ 43 (3.922588159), EP300 @ 44 (3.908165976), HSP90AB1 @ 47 (3.89559168), HRAS @ 55 (3.85675947), ERBB2 @ 67 (3.830356053), SRC @ 72 (3.815262485), FANCC @ 83 (3.776114382), LEF1 @ 87 (3.76476…	H3C6	339	3.24823	EP300 @ 3 (4.566455535), TP53 @ 7 (4.263878027), SMARCA4 @ 27 (4.004652833), H3C13 @ 28 (3.995298939), H3C12 @ 30 (3.990523587), H2AX @ 33 (3.978872976), RPS27A @ 35 (3.95946954), UBA52 @ 41 (3.930125003), H4C6 @ 52 (3.853376106), H3-3B @ 54 (3.833825465), DNMT3B @ 66 (3.768542304), SOX2 @ 70 (3.761055665), TP53BP1 @ 78 (3.725074195), XRCC6 @ 80 (3.718531754), H3-4 @ 88 (3.699941274), POU5F1 @ 90…
FYN	344	3.19603	EGFR @ 18 (4.255273461), GRB2 @ 21 (4.184991908), CDH1 @ 26 (4.048973937), CDK1 @ 36 (3.960479767), CTNNB1 @ 42 (3.926547961), HSP90AB1 @ 47 (3.89559168), PIK3CA @ 49 (3.87790566), HRAS @ 55 (3.85675947), PIK3R2 @ 57 (3.849769814), NRG1 @ 59 (3.848289148), ERBB2 @ 67 (3.830356053), CLTC @ 68 (3.829350917), NPVF @ 71 (3.816793449), SRC @ 72 (3.815262485), PLCG1 @ 73 (3.813392608), PIK3CD @ 76 (3.8…	CREB1	340	3.2481	EP300 @ 3 (4.566455535), TP53 @ 7 (4.263878027), XRCC1 @ 9 (4.232647006), BRCA1 @ 14 (4.109727894), YAP1 @ 15 (4.103703234), CDK1 @ 18 (4.078436677), NRF1 @ 22 (4.046253517), CTNNB1 @ 23 (4.032609254), NFKB1 @ 24 (4.021122149), SMARCA4 @ 27 (4.004652833), HDAC2 @ 31 (3.989763953), JUN @ 42 (3.928420791), HDAC1 @ 45 (3.875037284), SOX9 @ 50 (3.856009024), MYC @ 56 (3.825986802), ATM @ 59 (3.803938…
MAPK1	348	3.18988	CDK2 @ 3 (4.692024128), INSR @ 10 (4.567054143), EGFR @ 18 (4.255273461), RUNX1 @ 19 (4.230547681), GRB2 @ 21 (4.184991908), TP53 @ 29 (4.011818792), NRAS @ 41 (3.934319021), KRAS @ 43 (3.922588159), EP300 @ 44 (3.908165976), HSP90AB1 @ 47 (3.89559168), HRAS @ 55 (3.85675947), SRC @ 72 (3.815262485), YWHAB @ 75 (3.807771122), GNB1 @ 80 (3.788808915), CYCS @ 81 (3.787614979), FHL2 @ 82 (3.78499495…	CASP3	341	3.24712	TP53 @ 7 (4.263878027), ELAVL1 @ 12 (4.178507033), BRCA1 @ 14 (4.109727894), APP @ 20 (4.06357256), CTNNB1 @ 23 (4.032609254), NFKB1 @ 24 (4.021122149), H3C13 @ 28 (3.995298939), H3C12 @ 30 (3.990523587), YWHAE @ 37 (3.946570154), ZBTB16 @ 38 (3.943619187), JUN @ 42 (3.928420791), MDM2 @ 47 (3.863162591), CDH1 @ 48 (3.861344958), H3-3B @ 54 (3.833825465), AR @ 64 (3.786837043), STAT1 @ 72 (3.7593…
CSF1R	351	3.18168	RUNX1 @ 19 (4.230547681), GRB2 @ 21 (4.184991908), KRAS @ 43 (3.922588159), HSP90AB1 @ 47 (3.89559168), PIK3CA @ 49 (3.87790566), PIK3R2 @ 57 (3.849769814), SRC @ 72 (3.815262485), SHC1 @ 89 (3.749321692), STAT3 @ 92 (3.744179493), INS @ 94 (3.741981928), PLCG2 @ 98 (3.731445794), FGF9 @ 100 (3.722014894)	PPP2R1A	344	3.24517	TP53 @ 7 (4.263878027), EGFR @ 8 (4.259252678), CHEK2 @ 10 (4.196264648), ELAVL1 @ 12 (4.178507033), YAP1 @ 15 (4.103703234), CDK1 @ 18 (4.078436677), NRF1 @ 22 (4.046253517), CTNNB1 @ 23 (4.032609254), NFKB1 @ 24 (4.021122149), JUN @ 42 (3.928420791), HDAC1 @ 45 (3.875037284), ERBB2 @ 53 (3.843354357), RELA @ 55 (3.832644555), TRAF6 @ 60 (3.802540496), NPM1 @ 79 (3.723229211), AKT1 @ 82 (3.71671…
CSF1	356	3.17632	ERBB3 @ 1 (5), EGFR @ 18 (4.255273461), GRB2 @ 21 (4.184991908), IGF1R @ 23 (4.061111546), PIK3R2 @ 57 (3.849769814), ERBB2 @ 67 (3.830356053), SRC @ 72 (3.815262485), ERBB4 @ 84 (3.769879596), SHC1 @ 89 (3.749321692), STAT3 @ 92 (3.744179493)	ISG15	351	3.2395	RPS26 @ 4 (4.467848456), ELAVL1 @ 12 (4.178507033), CTNNB1 @ 23 (4.032609254), NFKB1 @ 24 (4.021122149), RPS27A @ 35 (3.95946954), IRF1 @ 39 (3.937384347), UBA52 @ 41 (3.930125003), STAT1 @ 72 (3.759329862), HSP90AB1 @ 77 (3.725182879), XRCC6 @ 80 (3.718531754), HSP90AA1 @ 87 (3.706481498), CLTC @ 98 (3.665966184)
PPP2CA	360	3.17356	CDK2 @ 3 (4.692024128), YAP1 @ 8 (4.590383402), INSR @ 10 (4.567054143), EGFR @ 18 (4.255273461), TP53 @ 29 (4.011818792), CDK1 @ 36 (3.960479767), CTNNB1 @ 42 (3.926547961), CBX5 @ 60 (3.848006823), TERF1 @ 65 (3.835912394), ERBB2 @ 67 (3.830356053), NPM1 @ 70 (3.818434018), SRC @ 72 (3.815262485)	PTK2B	352	3.2385	ERBB3 @ 2 (4.731127927), EGFR @ 8 (4.259252678), RAB5B @ 21 (4.053134222), SRC @ 32 (3.98269232), ERBB2 @ 53 (3.843354357), GRB2 @ 65 (3.770730971), STAT3 @ 75 (3.739433125), HSP90AB1 @ 77 (3.725182879), HSP90AA1 @ 87 (3.706481498), ESR1 @ 95 (3.677494751)
CREB1	372	3.16206	YAP1 @ 8 (4.590383402), TP53 @ 29 (4.011818792), CDK1 @ 36 (3.960479767), CTNNB1 @ 42 (3.926547961), EP300 @ 44 (3.908165976), FHL2 @ 82 (3.784994951), FOXO1 @ 90 (3.74627242), STAT3 @ 92 (3.744179493)	PIK3R2	353	3.23769	ERBB3 @ 2 (4.731127927), EGFR @ 8 (4.259252678), APP @ 20 (4.06357256), ERBB4 @ 29 (3.99164713), SRC @ 32 (3.98269232), ERBB2 @ 53 (3.843354357), AR @ 64 (3.786837043), GRB2 @ 65 (3.770730971), STAT3 @ 75 (3.739433125), AKT1 @ 82 (3.716718023), YWHAB @ 93 (3.686814642), ESR1 @ 95 (3.677494751)
BTRC	375	3.15995	YAP1 @ 8 (4.590383402), TP53 @ 29 (4.011818792), CTBP1 @ 34 (3.965358784), CDK1 @ 36 (3.960479767), CTNNB1 @ 42 (3.926547961), EP300 @ 44 (3.908165976), HSP90AB1 @ 47 (3.89559168), HRAS @ 55 (3.85675947), UBA52 @ 58 (3.849143067), RPS27A @ 64 (3.841632945), TERF1 @ 65 (3.835912394), LEF1 @ 87 (3.764766052)	CCR5	366	3.21831	STAT1 @ 72 (3.759329862), STAT3 @ 75 (3.739433125)
FLT3LG	377	3.15878	RPS26 @ 4 (4.685311238), EGFR @ 18 (4.255273461), UBA52 @ 58 (3.849143067), RPS27A @ 64 (3.841632945), ERBB2 @ 67 (3.830356053)	H3C10	374	3.21344	EP300 @ 3 (4.566455535), TP53 @ 7 (4.263878027), SMARCA4 @ 27 (4.004652833), H3C13 @ 28 (3.995298939), H3C12 @ 30 (3.990523587), H2AX @ 33 (3.978872976), RPS27A @ 35 (3.95946954), UBA52 @ 41 (3.930125003), H4C6 @ 52 (3.853376106), H3-3B @ 54 (3.833825465), DNMT3B @ 66 (3.768542304), SOX2 @ 70 (3.761055665), TP53BP1 @ 78 (3.725074195), H3-4 @ 88 (3.699941274), POU5F1 @ 90 (3.694597021)
CDKN1A	380	3.15765	CDK2 @ 3 (4.692024128), IKZF3 @ 16 (4.29678545), TP53 @ 29 (4.011818792), CDK1 @ 36 (3.960479767), EP300 @ 44 (3.908165976), HSP90AB1 @ 47 (3.89559168), RPS27A @ 64 (3.841632945), NPM1 @ 70 (3.818434018), FOXO1 @ 90 (3.74627242), APP @ 91 (3.745785722), STAT3 @ 92 (3.744179493)	BTRC	378	3.21029	EP300 @ 3 (4.566455535), TP53 @ 7 (4.263878027), ELAVL1 @ 12 (4.178507033), YAP1 @ 15 (4.103703234), CDK1 @ 18 (4.078436677), NRF1 @ 22 (4.046253517), CTNNB1 @ 23 (4.032609254), NFKB1 @ 24 (4.021122149), RPS27A @ 35 (3.95946954), UBA52 @ 41 (3.930125003), MDM2 @ 47 (3.863162591), EZH2 @ 49 (3.859099803), RELA @ 55 (3.832644555), MYC @ 56 (3.825986802), PRKACA @ 69 (3.762362936), HSP90AB1 @ 77 (3.…
UBC	386	3.15136	CDK2 @ 3 (4.692024128), TBP @ 13 (4.487899762), EGFR @ 18 (4.255273461), TP53 @ 29 (4.011818792), EP300 @ 44 (3.908165976), HSP90AB1 @ 47 (3.89559168), UBA52 @ 58 (3.849143067), RPS27A @ 64 (3.841632945)	H3C2	386	3.20075	EP300 @ 3 (4.566455535), TP53 @ 7 (4.263878027), SMARCA4 @ 27 (4.004652833), H3C13 @ 28 (3.995298939), H3C12 @ 30 (3.990523587), H2AX @ 33 (3.978872976), RPS27A @ 35 (3.95946954), UBA52 @ 41 (3.930125003), H4C6 @ 52 (3.853376106), H3-3B @ 54 (3.833825465), DNMT3B @ 66 (3.768542304), SOX2 @ 70 (3.761055665), TP53BP1 @ 78 (3.725074195), H3-4 @ 88 (3.699941274), POU5F1 @ 90 (3.694597021)
OPRM1	391	3.14791	GNAS @ 27 (4.026244404), GRK2 @ 45 (3.906377942), POMC @ 56 (3.852283734), GNB1 @ 80 (3.788808915), GNG2 @ 86 (3.766846214)	NFKBIA	388	3.19951	EP300 @ 3 (4.566455535), TP53 @ 7 (4.263878027), NFKB1 @ 24 (4.021122149), IKZF4 @ 25 (4.018444209), HDAC2 @ 31 (3.989763953), SRC @ 32 (3.98269232), RPS27A @ 35 (3.95946954), UBA52 @ 41 (3.930125003), JUN @ 42 (3.928420791), HDAC1 @ 45 (3.875037284), RELA @ 55 (3.832644555), TRAF6 @ 60 (3.802540496), PRKACA @ 69 (3.762362936), STAT1 @ 72 (3.759329862), STAT3 @ 75 (3.739433125), AKT1 @ 82 (3.7167…
H3C1	394	3.14454	EGFR @ 18 (4.255273461), GRB2 @ 21 (4.184991908), TP53 @ 29 (4.011818792), YWHAE @ 31 (4.000171791), EP300 @ 44 (3.908165976), UBA52 @ 58 (3.849143067), CBX5 @ 60 (3.848006823), RPS27A @ 64 (3.841632945), NPM1 @ 70 (3.818434018), YWHAB @ 75 (3.807771122)	H3C4	389	3.19926	EP300 @ 3 (4.566455535), TP53 @ 7 (4.263878027), SMARCA4 @ 27 (4.004652833), H3C13 @ 28 (3.995298939), H3C12 @ 30 (3.990523587), H2AX @ 33 (3.978872976), RPS27A @ 35 (3.95946954), UBA52 @ 41 (3.930125003), H4C6 @ 52 (3.853376106), H3-3B @ 54 (3.833825465), DNMT3B @ 66 (3.768542304), SOX2 @ 70 (3.761055665), TP53BP1 @ 78 (3.725074195), H3-4 @ 88 (3.699941274), POU5F1 @ 90 (3.694597021)
NEDD4	396	3.14028	ERBB3 @ 1 (5), EGFR @ 18 (4.255273461), IGF1R @ 23 (4.061111546), UBA52 @ 58 (3.849143067), RPS27A @ 64 (3.841632945), SRC @ 72 (3.815262485), ERBB4 @ 84 (3.769879596)	H3C7	391	3.19676	EP300 @ 3 (4.566455535), TP53 @ 7 (4.263878027), SMARCA4 @ 27 (4.004652833), H3C13 @ 28 (3.995298939), H3C12 @ 30 (3.990523587), H2AX @ 33 (3.978872976), RPS27A @ 35 (3.95946954), UBA52 @ 41 (3.930125003), H4C6 @ 52 (3.853376106), H3-3B @ 54 (3.833825465), DNMT3B @ 66 (3.768542304), SOX2 @ 70 (3.761055665), TP53BP1 @ 78 (3.725074195), H3-4 @ 88 (3.699941274), POU5F1 @ 90 (3.694597021)
FANCE	403	3.13577	RPS26 @ 4 (4.685311238), UBA52 @ 58 (3.849143067), RPS27A @ 64 (3.841632945), FANCC @ 83 (3.776114382)	CBL	392	3.1947	ERBB3 @ 2 (4.731127927), EGFR @ 8 (4.259252678), CTNNB1 @ 23 (4.032609254), ERBB4 @ 29 (3.99164713), SRC @ 32 (3.98269232), RPS27A @ 35 (3.95946954), YWHAE @ 37 (3.946570154), IRF1 @ 39 (3.937384347), UBA52 @ 41 (3.930125003), ERBB2 @ 53 (3.843354357), TRAF6 @ 60 (3.802540496), GRB2 @ 65 (3.770730971), PRKACA @ 69 (3.762362936), STAT3 @ 75 (3.739433125), AKT1 @ 82 (3.716718023), YWHAB @ 93 (3.686…
FLT3	412	3.12699	GRB2 @ 21 (4.184991908), NRAS @ 41 (3.934319021), KRAS @ 43 (3.922588159), PIK3CA @ 49 (3.87790566), HRAS @ 55 (3.85675947), PIK3R2 @ 57 (3.849769814), ERBB2 @ 67 (3.830356053), NPM1 @ 70 (3.818434018), PIK3CD @ 76 (3.806903236), PIK3CB @ 79 (3.788819698), PIK3R3 @ 88 (3.750814494), SHC1 @ 89 (3.749321692), STAT3 @ 92 (3.744179493), INS @ 94 (3.741981928), FGF9 @ 100 (3.722014894)	H3C8	393	3.19456	EP300 @ 3 (4.566455535), TP53 @ 7 (4.263878027), SMARCA4 @ 27 (4.004652833), H3C13 @ 28 (3.995298939), H3C12 @ 30 (3.990523587), H2AX @ 33 (3.978872976), RPS27A @ 35 (3.95946954), UBA52 @ 41 (3.930125003), H4C6 @ 52 (3.853376106), H3-3B @ 54 (3.833825465), DNMT3B @ 66 (3.768542304), SOX2 @ 70 (3.761055665), TP53BP1 @ 78 (3.725074195), H3-4 @ 88 (3.699941274), POU5F1 @ 90 (3.694597021)
EGR1	414	3.12572	ERBB3 @ 1 (5), YAP1 @ 8 (4.590383402), TP53 @ 29 (4.011818792), CTNNB1 @ 42 (3.926547961), EP300 @ 44 (3.908165976), LEF1 @ 87 (3.764766052), STAT3 @ 92 (3.744179493)	H3C11	400	3.18803	EP300 @ 3 (4.566455535), TP53 @ 7 (4.263878027), SMARCA4 @ 27 (4.004652833), H3C13 @ 28 (3.995298939), H3C12 @ 30 (3.990523587), H2AX @ 33 (3.978872976), RPS27A @ 35 (3.95946954), UBA52 @ 41 (3.930125003), H4C6 @ 52 (3.853376106), H3-3B @ 54 (3.833825465), DNMT3B @ 66 (3.768542304), SOX2 @ 70 (3.761055665), TP53BP1 @ 78 (3.725074195), H3-4 @ 88 (3.699941274), POU5F1 @ 90 (3.694597021)
FANCL	420	3.12402	IKZF3 @ 16 (4.29678545), CTNNB1 @ 42 (3.926547961), FANCC @ 83 (3.776114382)	NANOG	401	3.18725	CTNNB1 @ 23 (4.032609254), H3C13 @ 28 (3.995298939), H3C12 @ 30 (3.990523587), HDAC2 @ 31 (3.989763953), HDAC1 @ 45 (3.875037284), NR0B1 @ 46 (3.864347127), H3-3B @ 54 (3.833825465), MYC @ 56 (3.825986802), DNMT3B @ 66 (3.768542304), SOX2 @ 70 (3.761055665), STAT3 @ 75 (3.739433125), EOMES @ 81 (3.71727676), H3-4 @ 88 (3.699941274), POU5F1 @ 90 (3.694597021), SOX17 @ 94 (3.68198241)
IKBKG	436	3.1144	CDK2 @ 3 (4.692024128), EGFR @ 18 (4.255273461), MUC1 @ 46 (3.897446897), HSP90AB1 @ 47 (3.89559168), UBA52 @ 58 (3.849143067), RPS27A @ 64 (3.841632945), CLTC @ 68 (3.829350917), SRC @ 72 (3.815262485)	IRS1	404	3.18643	ERBB3 @ 2 (4.731127927), TP53 @ 7 (4.263878027), EGFR @ 8 (4.259252678), APP @ 20 (4.06357256), NRF1 @ 22 (4.046253517), ERBB4 @ 29 (3.99164713), HDAC2 @ 31 (3.989763953), SRC @ 32 (3.98269232), YWHAE @ 37 (3.946570154), JUN @ 42 (3.928420791), CDH1 @ 48 (3.861344958), ERBB2 @ 53 (3.843354357), SIRT1 @ 61 (3.802094612), GRB2 @ 65 (3.770730971), STAT3 @ 75 (3.739433125), NPM1 @ 79 (3.723229211), A…
SOX2	437	3.11345	YAP1 @ 8 (4.590383402), EGFR @ 18 (4.255273461), RUNX1 @ 19 (4.230547681), SIN3A @ 33 (3.966211795), CTBP1 @ 34 (3.965358784), CDK1 @ 36 (3.960479767), CTNNB1 @ 42 (3.926547961), EP300 @ 44 (3.908165976), STAT3 @ 92 (3.744179493), SIN3B @ 96 (3.733086083)	PIK3R3	407	3.18503	ERBB3 @ 2 (4.731127927), EGFR @ 8 (4.259252678), ERBB4 @ 29 (3.99164713), SRC @ 32 (3.98269232), ERBB2 @ 53 (3.843354357), AR @ 64 (3.786837043), GRB2 @ 65 (3.770730971), STAT3 @ 75 (3.739433125), AKT1 @ 82 (3.716718023), ESR1 @ 95 (3.677494751)
PIN1	444	3.1102	CDK2 @ 3 (4.692024128), YAP1 @ 8 (4.590383402), IKZF3 @ 16 (4.29678545), IKZF1 @ 28 (4.018602888), TP53 @ 29 (4.011818792), CDK1 @ 36 (3.960479767), CTNNB1 @ 42 (3.926547961), EP300 @ 44 (3.908165976), ERBB2 @ 67 (3.830356053), SHC1 @ 89 (3.749321692), APP @ 91 (3.745785722), STAT3 @ 92 (3.744179493), GPHN @ 95 (3.735885107)	MAPK8	412	3.17778	EP300 @ 3 (4.566455535), TP53 @ 7 (4.263878027), EGFR @ 8 (4.259252678), BRCA1 @ 14 (4.109727894), APP @ 20 (4.06357256), CTNNB1 @ 23 (4.032609254), NFKB1 @ 24 (4.021122149), SRC @ 32 (3.98269232), H2AX @ 33 (3.978872976), YWHAE @ 37 (3.946570154), ZBTB16 @ 38 (3.943619187), JUN @ 42 (3.928420791), HDAC1 @ 45 (3.875037284), RELA @ 55 (3.832644555), MYC @ 56 (3.825986802), ATM @ 59 (3.803938404), …
SQSTM1	452	3.1022	INSR @ 10 (4.567054143), TP53 @ 29 (4.011818792), CDK1 @ 36 (3.960479767), PIK3CA @ 49 (3.87790566), UBA52 @ 58 (3.849143067), RPS27A @ 64 (3.841632945), NPM1 @ 70 (3.818434018), SHC1 @ 89 (3.749321692)	VCAM1	413	3.17766	MAPRE1 @ 6 (4.289142824), ELAVL1 @ 12 (4.178507033), KPNA2 @ 16 (4.098579501), CDK1 @ 18 (4.078436677), RPS27A @ 35 (3.95946954), YWHAE @ 37 (3.946570154), GRB2 @ 65 (3.770730971), STAT1 @ 72 (3.759329862), STAT3 @ 75 (3.739433125), HSP90AB1 @ 77 (3.725182879), NPM1 @ 79 (3.723229211), XRCC6 @ 80 (3.718531754), HSP90AA1 @ 87 (3.706481498), YWHAB @ 93 (3.686814642), CLTC @ 98 (3.665966184)
HNRNPA2B1	460	3.09521	ERBB3 @ 1 (5), GRB2 @ 21 (4.184991908), PAPSS2 @ 22 (4.109209196), YWHAE @ 31 (4.000171791), CTNNB1 @ 42 (3.926547961), HSP90AB1 @ 47 (3.89559168), UBA52 @ 58 (3.849143067), RPS27A @ 64 (3.841632945), NPM1 @ 70 (3.818434018), SHC1 @ 89 (3.749321692)	HIF1A	416	3.17565	EP300 @ 3 (4.566455535), TP53 @ 7 (4.263878027), EGFR @ 8 (4.259252678), ELAVL1 @ 12 (4.178507033), BRCA1 @ 14 (4.109727894), CDK1 @ 18 (4.078436677), CTNNB1 @ 23 (4.032609254), SMARCA4 @ 27 (4.004652833), HDAC2 @ 31 (3.989763953), SRC @ 32 (3.98269232), JUN @ 42 (3.928420791), HDAC1 @ 45 (3.875037284), MDM2 @ 47 (3.863162591), EZH2 @ 49 (3.859099803), RELA @ 55 (3.832644555), MYC @ 56 (3.8259868…
TRAF6	464	3.09204	RPS26 @ 4 (4.685311238), EGFR @ 18 (4.255273461), RUNX1 @ 19 (4.230547681), IGF1R @ 23 (4.061111546), TP53 @ 29 (4.011818792), PIK3CA @ 49 (3.87790566), UBA52 @ 58 (3.849143067), RPS27A @ 64 (3.841632945), NPM1 @ 70 (3.818434018), SRC @ 72 (3.815262485), CYCS @ 81 (3.787614979), FHL2 @ 82 (3.784994951), APP @ 91 (3.745785722), STAT3 @ 92 (3.744179493)	FANCE	418	3.17409	RPS26 @ 4 (4.467848456), ELAVL1 @ 12 (4.178507033), BRCA1 @ 14 (4.109727894), RPS27A @ 35 (3.95946954), UBA52 @ 41 (3.930125003), MED1 @ 84 (3.711224374)
PTK2B	469	3.08965	ERBB3 @ 1 (5), EGFR @ 18 (4.255273461), GRB2 @ 21 (4.184991908), HSP90AB1 @ 47 (3.89559168), ERBB2 @ 67 (3.830356053), SRC @ 72 (3.815262485), RAB5B @ 78 (3.79689129), FHL2 @ 82 (3.784994951), SHC1 @ 89 (3.749321692), STAT3 @ 92 (3.744179493)	SMAD7	420	3.17186	EP300 @ 3 (4.566455535), TP53 @ 7 (4.263878027), YAP1 @ 15 (4.103703234), CTNNB1 @ 23 (4.032609254), HDAC2 @ 31 (3.989763953), HDAC1 @ 45 (3.875037284), CDH1 @ 48 (3.861344958), MYC @ 56 (3.825986802), ATM @ 59 (3.803938404), SIRT1 @ 61 (3.802094612), STAT1 @ 72 (3.759329862), BMPR1B @ 76 (3.725317326), XRCC6 @ 80 (3.718531754), AKT1 @ 82 (3.716718023), SOX7 @ 99 (3.664760759)
MMP9	476	3.08381	CDH1 @ 26 (4.048973937), CTNNB1 @ 42 (3.926547961), SRC @ 72 (3.815262485), STAT3 @ 92 (3.744179493)	UBE2I	421	3.17169	EP300 @ 3 (4.566455535), TP53 @ 7 (4.263878027), BRCA1 @ 14 (4.109727894), CDK1 @ 18 (4.078436677), H2AX @ 33 (3.978872976), RPS27A @ 35 (3.95946954), ZBTB16 @ 38 (3.943619187), UBA52 @ 41 (3.930125003), JUN @ 42 (3.928420791), HDAC1 @ 45 (3.875037284), MDM2 @ 47 (3.863162591), H4C6 @ 52 (3.853376106), MYC @ 56 (3.825986802), ATM @ 59 (3.803938404), TRAF6 @ 60 (3.802540496), AR @ 64 (3.786837043)…
FLNA	477	3.08369	ERBB3 @ 1 (5), CDK2 @ 3 (4.692024128), GRB2 @ 21 (4.184991908), GNAS @ 27 (4.026244404), CDK1 @ 36 (3.960479767), HSP90AB1 @ 47 (3.89559168), DCN @ 53 (3.863807295), NPM1 @ 70 (3.818434018), SRC @ 72 (3.815262485), PLCG1 @ 73 (3.813392608)	CCND1	425	3.17044	EP300 @ 3 (4.566455535), TP53 @ 7 (4.263878027), EGFR @ 8 (4.259252678), ELAVL1 @ 12 (4.178507033), BRCA1 @ 14 (4.109727894), CDK1 @ 18 (4.078436677), CTNNB1 @ 23 (4.032609254), SMARCA4 @ 27 (4.004652833), H3C13 @ 28 (3.995298939), H3C12 @ 30 (3.990523587), HDAC2 @ 31 (3.989763953), SRC @ 32 (3.98269232), H2AX @ 33 (3.978872976), JUN @ 42 (3.928420791), HDAC1 @ 45 (3.875037284), MDM2 @ 47 (3.8631…
UBE2I	483	3.08168	CDK2 @ 3 (4.692024128), TBP @ 13 (4.487899762), IKZF3 @ 16 (4.29678545), IKZF1 @ 28 (4.018602888), TP53 @ 29 (4.011818792), SIN3A @ 33 (3.966211795), CTBP1 @ 34 (3.965358784), CDK1 @ 36 (3.960479767), EP300 @ 44 (3.908165976), UBA52 @ 58 (3.849143067), RPS27A @ 64 (3.841632945), CLTC @ 68 (3.829350917)	FOXO1	444	3.14952	EP300 @ 3 (4.566455535), CDK1 @ 18 (4.078436677), CTNNB1 @ 23 (4.032609254), NFKB1 @ 24 (4.021122149), SMARCA4 @ 27 (4.004652833), SRC @ 32 (3.98269232), JUN @ 42 (3.928420791), HDAC1 @ 45 (3.875037284), MDM2 @ 47 (3.863162591), MYC @ 56 (3.825986802), FSHR @ 58 (3.813411806), ATM @ 59 (3.803938404), SIRT1 @ 61 (3.802094612), AR @ 64 (3.786837043), PRKACA @ 69 (3.762362936), STAT3 @ 75 (3.7394331…
MAPKAPK2	491	3.07077	TP53 @ 29 (4.011818792), SHC1 @ 89 (3.749321692), STAT3 @ 92 (3.744179493)	ITGB1	445	3.14526	EGFR @ 8 (4.259252678), ELAVL1 @ 12 (4.178507033), APP @ 20 (4.06357256), SRC @ 32 (3.98269232), CDH1 @ 48 (3.861344958), ERBB2 @ 53 (3.843354357), PRKACA @ 69 (3.762362936), STAT3 @ 75 (3.739433125), AKT1 @ 82 (3.716718023), YWHAB @ 93 (3.686814642)
PRKCD	492	3.06963	INSR @ 10 (4.567054143), EGFR @ 18 (4.255273461), IGF1R @ 23 (4.061111546), TP53 @ 29 (4.011818792), CTNNB1 @ 42 (3.926547961), EP300 @ 44 (3.908165976), GRK2 @ 45 (3.906377942), MUC1 @ 46 (3.897446897), HSP90AB1 @ 47 (3.89559168), PIK3CA @ 49 (3.87790566), PIK3R2 @ 57 (3.849769814), NPM1 @ 70 (3.818434018), SRC @ 72 (3.815262485), PLCG1 @ 73 (3.813392608), YWHAB @ 75 (3.807771122), PIK3CD @ 76 (…	HLA-DRA	447	3.14475	YWHAE @ 37 (3.946570154), STAT1 @ 72 (3.759329862), HSP90AB1 @ 77 (3.725182879), HSP90AA1 @ 87 (3.706481498)
SOCS3	496	3.0685	INSR @ 10 (4.567054143), EGFR @ 18 (4.255273461), RUNX1 @ 19 (4.230547681), IGF1R @ 23 (4.061111546), APP @ 91 (3.745785722), STAT3 @ 92 (3.744179493)	CDC42	451	3.13976	TP53 @ 7 (4.263878027), EGFR @ 8 (4.259252678), ELAVL1 @ 12 (4.178507033), NRF1 @ 22 (4.046253517), CTNNB1 @ 23 (4.032609254), SRC @ 32 (3.98269232), JUN @ 42 (3.928420791), RAB35 @ 44 (3.880783612), CDH1 @ 48 (3.861344958), ERBB2 @ 53 (3.843354357), MYC @ 56 (3.825986802), TRAF6 @ 60 (3.802540496), GRB2 @ 65 (3.770730971), AKT1 @ 82 (3.716718023), RAD51 @ 85 (3.708628165)
TCP1	510	3.0586	CDK2 @ 3 (4.692024128), GRB2 @ 21 (4.184991908), TP53 @ 29 (4.011818792), CDK1 @ 36 (3.960479767), HSP90AB1 @ 47 (3.89559168), NPM1 @ 70 (3.818434018)	TGFB1	455	3.13709	EP300 @ 3 (4.566455535), TP53 @ 7 (4.263878027), EGFR @ 8 (4.259252678), APP @ 20 (4.06357256), CTNNB1 @ 23 (4.032609254), SRC @ 32 (3.98269232), FOXP3 @ 34 (3.966832631), YWHAE @ 37 (3.946570154), CDH1 @ 48 (3.861344958), ERBB2 @ 53 (3.843354357), MYC @ 56 (3.825986802), STAT3 @ 75 (3.739433125), AKT1 @ 82 (3.716718023)
KPNB1	527	3.0489	CDK2 @ 3 (4.692024128), EGFR @ 18 (4.255273461), KPNA2 @ 20 (4.185288434), TP53 @ 29 (4.011818792), YWHAE @ 31 (4.000171791), TERF2 @ 48 (3.885006348), TERF1 @ 65 (3.835912394), ERBB2 @ 67 (3.830356053), CLTC @ 68 (3.829350917), NPM1 @ 70 (3.818434018)	MAPT	463	3.1282	EP300 @ 3 (4.566455535), MAPRE1 @ 6 (4.289142824), EGFR @ 8 (4.259252678), CHEK2 @ 10 (4.196264648), CDK1 @ 18 (4.078436677), APP @ 20 (4.06357256), NRF1 @ 22 (4.046253517), SRC @ 32 (3.98269232), YWHAE @ 37 (3.946570154), TRAF6 @ 60 (3.802540496), SIRT1 @ 61 (3.802094612), PRKACA @ 69 (3.762362936), HSP90AB1 @ 77 (3.725182879), AKT1 @ 82 (3.716718023), HSP90AA1 @ 87 (3.706481498), YWHAB @ 93 (3.…
LYN	531	3.04754	CDK2 @ 3 (4.692024128), EGFR @ 18 (4.255273461), GRB2 @ 21 (4.184991908), TP53 @ 29 (4.011818792), CDK1 @ 36 (3.960479767), NRAS @ 41 (3.934319021), KRAS @ 43 (3.922588159), MUC1 @ 46 (3.897446897), HSP90AB1 @ 47 (3.89559168), PIK3CA @ 49 (3.87790566), HRAS @ 55 (3.85675947), PIK3R2 @ 57 (3.849769814), SRC @ 72 (3.815262485), PLCG1 @ 73 (3.813392608), PIK3CD @ 76 (3.806903236), PIK3CB @ 79 (3.788…	HSPA8	466	3.12286	TP53 @ 7 (4.263878027), EGFR @ 8 (4.259252678), BRCA1 @ 14 (4.109727894), APP @ 20 (4.06357256), NRF1 @ 22 (4.046253517), CTNNB1 @ 23 (4.032609254), NFKB1 @ 24 (4.021122149), RPS27A @ 35 (3.95946954), YWHAE @ 37 (3.946570154), CDK9 @ 40 (3.936164117), UBA52 @ 41 (3.930125003), JUN @ 42 (3.928420791), MDM2 @ 47 (3.863162591), CDH1 @ 48 (3.861344958), RELA @ 55 (3.832644555), MYC @ 56 (3.825986802)…
HSPA8	538	3.04164	CDK2 @ 3 (4.692024128), EGFR @ 18 (4.255273461), GRB2 @ 21 (4.184991908), CDH1 @ 26 (4.048973937), TP53 @ 29 (4.011818792), YWHAE @ 31 (4.000171791), CTNNB1 @ 42 (3.926547961), GRK2 @ 45 (3.906377942), HSP90AB1 @ 47 (3.89559168), PIK3R2 @ 57 (3.849769814), UBA52 @ 58 (3.849143067), RPS27A @ 64 (3.841632945), CLTC @ 68 (3.829350917), CYCS @ 81 (3.787614979), FANCC @ 83 (3.776114382), SHC1 @ 89 (3.…	FANCL	476	3.11568	BRCA1 @ 14 (4.109727894), NRF1 @ 22 (4.046253517), CTNNB1 @ 23 (4.032609254), BMPR1B @ 76 (3.725317326)
ISG15	542	3.03789	RPS26 @ 4 (4.685311238), SIN3A @ 33 (3.966211795), CTNNB1 @ 42 (3.926547961), HSP90AB1 @ 47 (3.89559168), UBA52 @ 58 (3.849143067), RPS27A @ 64 (3.841632945), CLTC @ 68 (3.829350917)	CANX	477	3.11503	ERBB3 @ 2 (4.731127927), EGFR @ 8 (4.259252678), ELAVL1 @ 12 (4.178507033), CDK1 @ 18 (4.078436677), JUN @ 42 (3.928420791), MDM2 @ 47 (3.863162591), ERBB2 @ 53 (3.843354357), FSHR @ 58 (3.813411806), TRAF6 @ 60 (3.802540496), HSP90AB1 @ 77 (3.725182879), HSP90AA1 @ 87 (3.706481498), CDK2 @ 89 (3.699623682)
EIF2AK2	543	3.03787	RPS26 @ 4 (4.685311238), TP53 @ 29 (4.011818792), CDK1 @ 36 (3.960479767), HSP90AB1 @ 47 (3.89559168), RPS27A @ 64 (3.841632945), NPM1 @ 70 (3.818434018), FANCC @ 83 (3.776114382), STAT3 @ 92 (3.744179493)	HLA-DRB1	485	3.10994	YWHAE @ 37 (3.946570154), HSP90AB1 @ 77 (3.725182879), HSP90AA1 @ 87 (3.706481498)
SH2B3	544	3.03678	ERBB3 @ 1 (5), EGFR @ 18 (4.255273461), GRB2 @ 21 (4.184991908), ERBB2 @ 67 (3.830356053), PLCG1 @ 73 (3.813392608)	TNF	503	3.09659	ELAVL1 @ 12 (4.178507033), APP @ 20 (4.06357256), NFKB1 @ 24 (4.021122149), HDAC2 @ 31 (3.989763953), SRC @ 32 (3.98269232), FOXP3 @ 34 (3.966832631), JUN @ 42 (3.928420791), RELA @ 55 (3.832644555), TRAF6 @ 60 (3.802540496), STAT3 @ 75 (3.739433125), AKT1 @ 82 (3.716718023)
VAV1	546	3.03552	ERBB3 @ 1 (5), INSR @ 10 (4.567054143), EGFR @ 18 (4.255273461), GRB2 @ 21 (4.184991908), PIK3CA @ 49 (3.87790566), HRAS @ 55 (3.85675947), PIK3R2 @ 57 (3.849769814), ERBB2 @ 67 (3.830356053), SRC @ 72 (3.815262485), PLCG1 @ 73 (3.813392608), PIK3CD @ 76 (3.806903236), PIK3CB @ 79 (3.788819698), PIK3R3 @ 88 (3.750814494), SHC1 @ 89 (3.749321692), PLCG2 @ 98 (3.731445794)	PIK3CD	519	3.08273	ERBB3 @ 2 (4.731127927), EGFR @ 8 (4.259252678), ERBB4 @ 29 (3.99164713), SRC @ 32 (3.98269232), ERBB2 @ 53 (3.843354357), AKT1 @ 82 (3.716718023)
EIF2S3	547	3.03439	CDK2 @ 3 (4.692024128), RPS26 @ 4 (4.685311238), RPS27A @ 64 (3.841632945)	CDKN1A	527	3.07771	EP300 @ 3 (4.566455535), TP53 @ 7 (4.263878027), CHEK2 @ 10 (4.196264648), BRCA1 @ 14 (4.109727894), CDK1 @ 18 (4.078436677), APP @ 20 (4.06357256), NFKB1 @ 24 (4.021122149), HDAC2 @ 31 (3.989763953), RPS27A @ 35 (3.95946954), ZBTB16 @ 38 (3.943619187), JUN @ 42 (3.928420791), HDAC1 @ 45 (3.875037284), MDM2 @ 47 (3.863162591), H3-3B @ 54 (3.833825465), RELA @ 55 (3.832644555), MYC @ 56 (3.8259868…
MMP2	548	3.03438	CDH1 @ 26 (4.048973937), CTNNB1 @ 42 (3.926547961), DCN @ 53 (3.863807295), SRC @ 72 (3.815262485), STAT3 @ 92 (3.744179493)	PIAS1	542	3.06916	GATA4 @ 1 (5), TP53 @ 7 (4.263878027), BRCA1 @ 14 (4.109727894), HDAC2 @ 31 (3.989763953), JUN @ 42 (3.928420791), HDAC1 @ 45 (3.875037284), MDM2 @ 47 (3.863162591), RELA @ 55 (3.832644555), AR @ 64 (3.786837043), DNMT3B @ 66 (3.768542304), SOX2 @ 70 (3.761055665), STAT1 @ 72 (3.759329862), STAT3 @ 75 (3.739433125), TP53BP1 @ 78 (3.725074195), AKT1 @ 82 (3.716718023), ESR1 @ 95 (3.677494751)
CRKL	565	3.02271	ERBB3 @ 1 (5), INSR @ 10 (4.567054143), EGFR @ 18 (4.255273461), GRB2 @ 21 (4.184991908), IGF1R @ 23 (4.061111546), PIK3CA @ 49 (3.87790566), PIK3R2 @ 57 (3.849769814), ERBB2 @ 67 (3.830356053), SRC @ 72 (3.815262485), PIK3CD @ 76 (3.806903236), PIK3CB @ 79 (3.788819698), ERBB4 @ 84 (3.769879596), PIK3R3 @ 88 (3.750814494), SHC1 @ 89 (3.749321692)	CENPS	547	3.06367	APP @ 20 (4.06357256), NRF1 @ 22 (4.046253517), H4C6 @ 52 (3.853376106)
B2M	583	3.00811	ERBB3 @ 1 (5), GRB2 @ 21 (4.184991908), APP @ 91 (3.745785722), INS @ 94 (3.741981928)	LCK	553	3.05921	EGFR @ 8 (4.259252678), SRC @ 32 (3.98269232), FOXP3 @ 34 (3.966832631), TRAF6 @ 60 (3.802540496), AR @ 64 (3.786837043), GRB2 @ 65 (3.770730971), PRKACA @ 69 (3.762362936), STAT1 @ 72 (3.759329862), STAT3 @ 75 (3.739433125), HSP90AB1 @ 77 (3.725182879), AKT1 @ 82 (3.716718023), HSP90AA1 @ 87 (3.706481498), ESR1 @ 95 (3.677494751)
CASP3	586	3.00724	CDK2 @ 3 (4.692024128), CDH1 @ 26 (4.048973937), TP53 @ 29 (4.011818792), YWHAE @ 31 (4.000171791), CTNNB1 @ 42 (3.926547961), HSP90AB1 @ 47 (3.89559168), CYCS @ 81 (3.787614979), APP @ 91 (3.745785722)	SHC1	563	3.05072	ERBB3 @ 2 (4.731127927), EGFR @ 8 (4.259252678), APP @ 20 (4.06357256), NRF1 @ 22 (4.046253517), ERBB4 @ 29 (3.99164713), SRC @ 32 (3.98269232), ERBB2 @ 53 (3.843354357), AR @ 64 (3.786837043), GRB2 @ 65 (3.770730971), STAT3 @ 75 (3.739433125), HSP90AB1 @ 77 (3.725182879), NPM1 @ 79 (3.723229211), AKT1 @ 82 (3.716718023), HSP90AA1 @ 87 (3.706481498), ESR1 @ 95 (3.677494751), CLTC @ 98 (3.66596618…
SYK	594	3.00175	ERBB3 @ 1 (5), EGFR @ 18 (4.255273461), GRB2 @ 21 (4.184991908), IKZF1 @ 28 (4.018602888), NRAS @ 41 (3.934319021), KRAS @ 43 (3.922588159), PIK3CA @ 49 (3.87790566), HRAS @ 55 (3.85675947), PIK3R2 @ 57 (3.849769814), TERF1 @ 65 (3.835912394), ERBB2 @ 67 (3.830356053), SRC @ 72 (3.815262485), PLCG1 @ 73 (3.813392608), PIK3CD @ 76 (3.806903236), PIK3CB @ 79 (3.788819698), FHL2 @ 82 (3.784994951), …	CDKN1B	572	3.04195	TP53 @ 7 (4.263878027), ELAVL1 @ 12 (4.178507033), KPNA2 @ 16 (4.098579501), CDK1 @ 18 (4.078436677), SRC @ 32 (3.98269232), RPS27A @ 35 (3.95946954), YWHAE @ 37 (3.946570154), IRF1 @ 39 (3.937384347), UBA52 @ 41 (3.930125003), MYC @ 56 (3.825986802), GRB2 @ 65 (3.770730971), AKT1 @ 82 (3.716718023), CDK2 @ 89 (3.699623682), YWHAB @ 93 (3.686814642)
FBXW11	602	2.9953	YAP1 @ 8 (4.590383402), YWHAE @ 31 (4.000171791), CTNNB1 @ 42 (3.926547961), HSP90AB1 @ 47 (3.89559168), CLTC @ 68 (3.829350917)	PML	573	3.04156	EP300 @ 3 (4.566455535), TP53 @ 7 (4.263878027), EGFR @ 8 (4.259252678), CHEK2 @ 10 (4.196264648), BRCA1 @ 14 (4.109727894), YAP1 @ 15 (4.103703234), CDK1 @ 18 (4.078436677), CTNNB1 @ 23 (4.032609254), NFKB1 @ 24 (4.021122149), SMARCA4 @ 27 (4.004652833), H3C13 @ 28 (3.995298939), H3C12 @ 30 (3.990523587), HDAC2 @ 31 (3.989763953), H2AX @ 33 (3.978872976), ZBTB16 @ 38 (3.943619187), JUN @ 42 (3.9…
BCL2	620	2.98791	CDK2 @ 3 (4.692024128), TP53 @ 29 (4.011818792), CDK1 @ 36 (3.960479767), FOXP3 @ 40 (3.94032475), NRAS @ 41 (3.934319021), KRAS @ 43 (3.922588159), EP300 @ 44 (3.908165976), HRAS @ 55 (3.85675947), CYCS @ 81 (3.787614979), STAT3 @ 92 (3.744179493)	POMC	578	3.03743	APP @ 20 (4.06357256), FSHR @ 58 (3.813411806), STAT3 @ 75 (3.739433125)
IRS2	623	2.98305	INSR @ 10 (4.567054143), EGFR @ 18 (4.255273461), GRB2 @ 21 (4.184991908), IGF1R @ 23 (4.061111546), YWHAE @ 31 (4.000171791), CDK1 @ 36 (3.960479767), PIK3CA @ 49 (3.87790566), PIK3R2 @ 57 (3.849769814), SRC @ 72 (3.815262485), PLCG1 @ 73 (3.813392608), YWHAB @ 75 (3.807771122), PIK3CD @ 76 (3.806903236), PIK3CB @ 79 (3.788819698), PIK3R3 @ 88 (3.750814494), SHC1 @ 89 (3.749321692), FOXO1 @ 90 (…	NEDD4	585	3.03265	ERBB3 @ 2 (4.731127927), EGFR @ 8 (4.259252678), ERBB4 @ 29 (3.99164713), SRC @ 32 (3.98269232), RPS27A @ 35 (3.95946954), UBA52 @ 41 (3.930125003), JUN @ 42 (3.928420791), MDM2 @ 47 (3.863162591), AKT1 @ 82 (3.716718023)
HIF1A	626	2.98227	CDK2 @ 3 (4.692024128), EGFR @ 18 (4.255273461), RUNX1 @ 19 (4.230547681), IGF1R @ 23 (4.061111546), TP53 @ 29 (4.011818792), CDK1 @ 36 (3.960479767), CTNNB1 @ 42 (3.926547961), EP300 @ 44 (3.908165976), MUC1 @ 46 (3.897446897), HSP90AB1 @ 47 (3.89559168), SRC @ 72 (3.815262485), FHL2 @ 82 (3.784994951), SHC1 @ 89 (3.749321692), FOXO1 @ 90 (3.74627242), STAT3 @ 92 (3.744179493)	CCL4	599	3.02571	STAT3 @ 75 (3.739433125)
TNF	629	2.97984	FOXP3 @ 40 (3.94032475), DCN @ 53 (3.863807295), SRC @ 72 (3.815262485), MADD @ 74 (3.812266803), APP @ 91 (3.745785722), STAT3 @ 92 (3.744179493)	CSF1R	615	3.01106	SRC @ 32 (3.98269232), GRB2 @ 65 (3.770730971), FGF9 @ 67 (3.766703653), RUNX1 @ 71 (3.759465655), STAT1 @ 72 (3.759329862), STAT3 @ 75 (3.739433125), HSP90AB1 @ 77 (3.725182879), HSP90AA1 @ 87 (3.706481498)
CSK	645	2.97569	ERBB3 @ 1 (5), INSR @ 10 (4.567054143), EGFR @ 18 (4.255273461), GRB2 @ 21 (4.184991908), IGF1R @ 23 (4.061111546), CTNNB1 @ 42 (3.926547961), HSP90AB1 @ 47 (3.89559168), ERBB2 @ 67 (3.830356053), SRC @ 72 (3.815262485), FHL2 @ 82 (3.784994951), SHC1 @ 89 (3.749321692), STAT3 @ 92 (3.744179493)	PLCG2	618	3.01034	ERBB3 @ 2 (4.731127927), TP53 @ 7 (4.263878027), EGFR @ 8 (4.259252678), ERBB4 @ 29 (3.99164713), SRC @ 32 (3.98269232), ERBB2 @ 53 (3.843354357), AR @ 64 (3.786837043), GRB2 @ 65 (3.770730971), STAT3 @ 75 (3.739433125), NPM1 @ 79 (3.723229211)
NUP153	650	2.97135	CDK2 @ 3 (4.692024128), KPNA2 @ 20 (4.185288434), CTNNB1 @ 42 (3.926547961)	MAPK14	624	3.00691	EP300 @ 3 (4.566455535), TP53 @ 7 (4.263878027), EGFR @ 8 (4.259252678), ELAVL1 @ 12 (4.178507033), CTNNB1 @ 23 (4.032609254), NFKB1 @ 24 (4.021122149), SRC @ 32 (3.98269232), UBA52 @ 41 (3.930125003), JUN @ 42 (3.928420791), EZH2 @ 49 (3.859099803), RELA @ 55 (3.832644555), MYC @ 56 (3.825986802), ATM @ 59 (3.803938404), TRAF6 @ 60 (3.802540496), AR @ 64 (3.786837043), GRB2 @ 65 (3.770730971), S…
ITGB1	661	2.96504	EGFR @ 18 (4.255273461), IGF1R @ 23 (4.061111546), CDH1 @ 26 (4.048973937), KRAS @ 43 (3.922588159), PIK3CA @ 49 (3.87790566), PIK3R2 @ 57 (3.849769814), ERBB2 @ 67 (3.830356053), SRC @ 72 (3.815262485), YWHAB @ 75 (3.807771122), PIK3CD @ 76 (3.806903236), PIK3CB @ 79 (3.788819698), FHL2 @ 82 (3.784994951), PIK3R3 @ 88 (3.750814494), SHC1 @ 89 (3.749321692), APP @ 91 (3.745785722), STAT3 @ 92 (3.…	ILF3	634	2.99889	EP300 @ 3 (4.566455535), RPS26 @ 4 (4.467848456), EGFR @ 8 (4.259252678), ELAVL1 @ 12 (4.178507033), RAD50 @ 19 (4.067545896), JUN @ 42 (3.928420791), MDM2 @ 47 (3.863162591), EZH2 @ 49 (3.859099803), GRB2 @ 65 (3.770730971), XRCC6 @ 80 (3.718531754), AKT1 @ 82 (3.716718023), HSP90AA1 @ 87 (3.706481498), CDK2 @ 89 (3.699623682), ESR1 @ 95 (3.677494751)
VCAM1	663	2.96368	KPNA2 @ 20 (4.185288434), GRB2 @ 21 (4.184991908), YWHAE @ 31 (4.000171791), CDK1 @ 36 (3.960479767), HSP90AB1 @ 47 (3.89559168), PIK3R2 @ 57 (3.849769814), RPS27A @ 64 (3.841632945), CLTC @ 68 (3.829350917), NPM1 @ 70 (3.818434018), YWHAB @ 75 (3.807771122), GNB1 @ 80 (3.788808915), STAT3 @ 92 (3.744179493)	FANCA	636	2.99692	BRCA1 @ 14 (4.109727894), CDK1 @ 18 (4.078436677), NRF1 @ 22 (4.046253517), CTNNB1 @ 23 (4.032609254), SMARCA4 @ 27 (4.004652833), SRC @ 32 (3.98269232), GRB2 @ 65 (3.770730971), HSP90AB1 @ 77 (3.725182879), NPM1 @ 79 (3.723229211), AKT1 @ 82 (3.716718023), RAD51 @ 85 (3.708628165), HSP90AA1 @ 87 (3.706481498)
ANXA2	668	2.96205	ERBB3 @ 1 (5), CDK2 @ 3 (4.692024128), EGFR @ 18 (4.255273461), GRB2 @ 21 (4.184991908), TP53 @ 29 (4.011818792), EP300 @ 44 (3.908165976), TERF1 @ 65 (3.835912394), ERBB2 @ 67 (3.830356053), NPM1 @ 70 (3.818434018), SRC @ 72 (3.815262485), SHC1 @ 89 (3.749321692), APP @ 91 (3.745785722)	STAT2	638	2.99598	EP300 @ 3 (4.566455535), EGFR @ 8 (4.259252678), ELAVL1 @ 12 (4.178507033), SMARCA4 @ 27 (4.004652833), IRF1 @ 39 (3.937384347), HDAC1 @ 45 (3.875037284), STAT1 @ 72 (3.759329862), STAT3 @ 75 (3.739433125), HSP90AB1 @ 77 (3.725182879), HSP90AA1 @ 87 (3.706481498)
PPP2R1A	673	2.95854	YAP1 @ 8 (4.590383402), EGFR @ 18 (4.255273461), TP53 @ 29 (4.011818792), CDK1 @ 36 (3.960479767), CTNNB1 @ 42 (3.926547961), KRAS @ 43 (3.922588159), ERBB2 @ 67 (3.830356053), NPM1 @ 70 (3.818434018), YWHAB @ 75 (3.807771122)	JAK3	646	2.98956	ERBB3 @ 2 (4.731127927), EGFR @ 8 (4.259252678), ELAVL1 @ 12 (4.178507033), CDK1 @ 18 (4.078436677), ERBB2 @ 53 (3.843354357), STAT1 @ 72 (3.759329862), STAT3 @ 75 (3.739433125)
PRTN3	675	2.95481	MPO @ 25 (4.049897784)	NCK1	653	2.98603	ERBB3 @ 2 (4.731127927), EGFR @ 8 (4.259252678), BRCA1 @ 14 (4.109727894), SRC @ 32 (3.98269232), UBA52 @ 41 (3.930125003), GRB2 @ 65 (3.770730971), AKT1 @ 82 (3.716718023)
RPLP0	690	2.94327	CDK2 @ 3 (4.692024128), RPS26 @ 4 (4.685311238), CDH1 @ 26 (4.048973937), TP53 @ 29 (4.011818792), YWHAE @ 31 (4.000171791), HSP90AB1 @ 47 (3.89559168), UBA52 @ 58 (3.849143067), RPS27A @ 64 (3.841632945), NPM1 @ 70 (3.818434018)	HGF	655	2.98567	ERBB3 @ 2 (4.731127927), EGFR @ 8 (4.259252678), ERBB4 @ 29 (3.99164713), SRC @ 32 (3.98269232), ERBB2 @ 53 (3.843354357), GRB2 @ 65 (3.770730971), STAT3 @ 75 (3.739433125), AKT1 @ 82 (3.716718023)
CDC42	699	2.93809	RAB35 @ 17 (4.272343404), EGFR @ 18 (4.255273461), GRB2 @ 21 (4.184991908), CDH1 @ 26 (4.048973937), TP53 @ 29 (4.011818792), CTNNB1 @ 42 (3.926547961), PIK3CA @ 49 (3.87790566), PIK3R2 @ 57 (3.849769814), ERBB2 @ 67 (3.830356053), SRC @ 72 (3.815262485), PIK3CD @ 76 (3.806903236), PIK3CB @ 79 (3.788819698), GNB1 @ 80 (3.788808915), PIK3R3 @ 88 (3.750814494)	IKBKG	662	2.98312	EGFR @ 8 (4.259252678), NFKB1 @ 24 (4.021122149), SRC @ 32 (3.98269232), RPS27A @ 35 (3.95946954), UBA52 @ 41 (3.930125003), RELA @ 55 (3.832644555), MYC @ 56 (3.825986802), ATM @ 59 (3.803938404), TRAF6 @ 60 (3.802540496), HSP90AB1 @ 77 (3.725182879), AKT1 @ 82 (3.716718023), KEAP1 @ 83 (3.711971154), HSP90AA1 @ 87 (3.706481498), CDK2 @ 89 (3.699623682), CLTC @ 98 (3.665966184)
PTPN12	701	2.93561	INSR @ 10 (4.567054143), EGFR @ 18 (4.255273461), GRB2 @ 21 (4.184991908), CTNNB1 @ 42 (3.926547961), CGA @ 50 (3.870818409), ERBB2 @ 67 (3.830356053), SRC @ 72 (3.815262485), FANCC @ 83 (3.776114382), SHC1 @ 89 (3.749321692), APP @ 91 (3.745785722)	TUBA1A	663	2.9826	MAPRE1 @ 6 (4.289142824), EGFR @ 8 (4.259252678), CTNNB1 @ 23 (4.032609254), NFKB1 @ 24 (4.021122149), YWHAE @ 37 (3.946570154), JUN @ 42 (3.928420791), RELA @ 55 (3.832644555), MYC @ 56 (3.825986802), SOX2 @ 70 (3.761055665), HSP90AB1 @ 77 (3.725182879), HSP90AA1 @ 87 (3.706481498), POU5F1 @ 90 (3.694597021), RAB7A @ 91 (3.694059873), YWHAB @ 93 (3.686814642), ESR1 @ 95 (3.677494751)
HCK	702	2.93555	ERBB3 @ 1 (5), EGFR @ 18 (4.255273461), GRB2 @ 21 (4.184991908), HSP90AB1 @ 47 (3.89559168), PIK3CA @ 49 (3.87790566), PIK3R2 @ 57 (3.849769814), SRC @ 72 (3.815262485), PLCG1 @ 73 (3.813392608), PIK3CD @ 76 (3.806903236), PIK3CB @ 79 (3.788819698), FHL2 @ 82 (3.784994951), PIK3R3 @ 88 (3.750814494), SHC1 @ 89 (3.749321692), APP @ 91 (3.745785722), STAT3 @ 92 (3.744179493), PLCG2 @ 98 (3.73144579…	CRK	674	2.97422	ERBB3 @ 2 (4.731127927), TP53 @ 7 (4.263878027), EGFR @ 8 (4.259252678), LIG3 @ 13 (4.116238444), NRF1 @ 22 (4.046253517), ERBB4 @ 29 (3.99164713), SRC @ 32 (3.98269232), YWHAE @ 37 (3.946570154), ERBB2 @ 53 (3.843354357), AR @ 64 (3.786837043), GRB2 @ 65 (3.770730971), HSP90AB1 @ 77 (3.725182879), AKT1 @ 82 (3.716718023), HSP90AA1 @ 87 (3.706481498)
MAPK8	732	2.91674	EGFR @ 18 (4.255273461), TP53 @ 29 (4.011818792), YWHAE @ 31 (4.000171791), CTBP1 @ 34 (3.965358784), NRAS @ 41 (3.934319021), CTNNB1 @ 42 (3.926547961), KRAS @ 43 (3.922588159), EP300 @ 44 (3.908165976), HRAS @ 55 (3.85675947), NPM1 @ 70 (3.818434018), SRC @ 72 (3.815262485), YWHAB @ 75 (3.807771122), SHC1 @ 89 (3.749321692), FOXO1 @ 90 (3.74627242), APP @ 91 (3.745785722), STAT3 @ 92 (3.7441794…	FLT3	678	2.9729	ERBB2 @ 53 (3.843354357), GRB2 @ 65 (3.770730971), FGF9 @ 67 (3.766703653), STAT3 @ 75 (3.739433125), NPM1 @ 79 (3.723229211), HSP90AA1 @ 87 (3.706481498)
FOXO3	733	2.9166	CDK2 @ 3 (4.692024128), TP53 @ 29 (4.011818792), YWHAE @ 31 (4.000171791), CDK1 @ 36 (3.960479767), CTNNB1 @ 42 (3.926547961), EP300 @ 44 (3.908165976), YWHAB @ 75 (3.807771122), PIK3CB @ 79 (3.788819698), SHC1 @ 89 (3.749321692), FOXO1 @ 90 (3.74627242), APP @ 91 (3.745785722), STAT3 @ 92 (3.744179493), INS @ 94 (3.741981928)	CENPX	691	2.9646	TP53 @ 7 (4.263878027), MDM2 @ 47 (3.863162591), H4C6 @ 52 (3.853376106)
MAPK14	747	2.90956	EGFR @ 18 (4.255273461), GRB2 @ 21 (4.184991908), TP53 @ 29 (4.011818792), CTNNB1 @ 42 (3.926547961), KRAS @ 43 (3.922588159), EP300 @ 44 (3.908165976), GRK2 @ 45 (3.906377942), UBA52 @ 58 (3.849143067), SRC @ 72 (3.815262485), GNB1 @ 80 (3.788808915), SHC1 @ 89 (3.749321692), FOXO1 @ 90 (3.74627242), STAT3 @ 92 (3.744179493)	SYK	692	2.96411	ERBB3 @ 2 (4.731127927), EGFR @ 8 (4.259252678), APP @ 20 (4.06357256), NFKB1 @ 24 (4.021122149), ERBB4 @ 29 (3.99164713), HDAC2 @ 31 (3.989763953), SRC @ 32 (3.98269232), HDAC1 @ 45 (3.875037284), MDM2 @ 47 (3.863162591), ERBB2 @ 53 (3.843354357), TRAF6 @ 60 (3.802540496), AR @ 64 (3.786837043), GRB2 @ 65 (3.770730971), STAT1 @ 72 (3.759329862), STAT3 @ 75 (3.739433125)
CTSG	754	2.90462	MPO @ 25 (4.049897784)	FLT3LG	694	2.96081	RPS26 @ 4 (4.467848456), EGFR @ 8 (4.259252678), RPS27A @ 35 (3.95946954), UBA52 @ 41 (3.930125003), ERBB2 @ 53 (3.843354357), MED1 @ 84 (3.711224374)
PML	758	2.90122	CDK2 @ 3 (4.692024128), YAP1 @ 8 (4.590383402), EGFR @ 18 (4.255273461), RUNX1 @ 19 (4.230547681), TP53 @ 29 (4.011818792), SIN3A @ 33 (3.966211795), CDK1 @ 36 (3.960479767), CTNNB1 @ 42 (3.926547961), EP300 @ 44 (3.908165976), TERF2 @ 48 (3.885006348), NPM1 @ 70 (3.818434018), PLCG1 @ 73 (3.813392608), FOXO1 @ 90 (3.74627242), STAT3 @ 92 (3.744179493)	BCL6	702	2.95472	EP300 @ 3 (4.566455535), TP53 @ 7 (4.263878027), CTNNB1 @ 23 (4.032609254), SMARCA4 @ 27 (4.004652833), HDAC2 @ 31 (3.989763953), FOXP3 @ 34 (3.966832631), ZBTB16 @ 38 (3.943619187), JUN @ 42 (3.928420791), HDAC1 @ 45 (3.875037284), EZH2 @ 49 (3.859099803), MYC @ 56 (3.825986802), SIRT1 @ 61 (3.802094612), STAT1 @ 72 (3.759329862), STAT3 @ 75 (3.739433125), HSP90AA1 @ 87 (3.706481498)
ILF3	776	2.88913	CDK2 @ 3 (4.692024128), RPS26 @ 4 (4.685311238), EGFR @ 18 (4.255273461), GRB2 @ 21 (4.184991908), EP300 @ 44 (3.908165976)	CSF1	705	2.95386	ERBB3 @ 2 (4.731127927), EGFR @ 8 (4.259252678), ERBB4 @ 29 (3.99164713), SRC @ 32 (3.98269232), ERBB2 @ 53 (3.843354357), MYC @ 56 (3.825986802), GRB2 @ 65 (3.770730971), STAT1 @ 72 (3.759329862), STAT3 @ 75 (3.739433125)
EIF4G1	777	2.88886	CDK2 @ 3 (4.692024128), RPS26 @ 4 (4.685311238), CDK1 @ 36 (3.960479767), RPS27A @ 64 (3.841632945)	CD80	706	2.95351	STAT3 @ 75 (3.739433125), AKT1 @ 82 (3.716718023)
RPS6KA1	791	2.8825	RPS26 @ 4 (4.685311238), GRB2 @ 21 (4.184991908), YWHAE @ 31 (4.000171791), NRAS @ 41 (3.934319021), KRAS @ 43 (3.922588159), HSP90AB1 @ 47 (3.89559168), HRAS @ 55 (3.85675947), NPM1 @ 70 (3.818434018), YWHAB @ 75 (3.807771122)	CD44	707	2.95325	EP300 @ 3 (4.566455535), TP53 @ 7 (4.263878027), EGFR @ 8 (4.259252678), ELAVL1 @ 12 (4.178507033), ERBB4 @ 29 (3.99164713), SRC @ 32 (3.98269232), ERBB2 @ 53 (3.843354357), MYC @ 56 (3.825986802), TRAF6 @ 60 (3.802540496), PRKACA @ 69 (3.762362936), STAT1 @ 72 (3.759329862), STAT3 @ 75 (3.739433125), AKT1 @ 82 (3.716718023)
SMAD7	799	2.87523	YAP1 @ 8 (4.590383402), CDH1 @ 26 (4.048973937), TP53 @ 29 (4.011818792), CTNNB1 @ 42 (3.926547961), EP300 @ 44 (3.908165976), LEF1 @ 87 (3.764766052)	SNCA	708	2.95278	EGFR @ 8 (4.259252678), APP @ 20 (4.06357256), SRC @ 32 (3.98269232), YWHAE @ 37 (3.946570154), TRAF6 @ 60 (3.802540496), AKT1 @ 82 (3.716718023), HSP90AA1 @ 87 (3.706481498), YWHAB @ 93 (3.686814642), CLTC @ 98 (3.665966184)
PPP2CB	810	2.87123	YAP1 @ 8 (4.590383402), EGFR @ 18 (4.255273461), TP53 @ 29 (4.011818792), NRAS @ 41 (3.934319021), KRAS @ 43 (3.922588159), CBX5 @ 60 (3.848006823), TERF1 @ 65 (3.835912394), ERBB2 @ 67 (3.830356053), SRC @ 72 (3.815262485)	KPNB1	728	2.93947	TP53 @ 7 (4.263878027), EGFR @ 8 (4.259252678), ELAVL1 @ 12 (4.178507033), KPNA2 @ 16 (4.098579501), YWHAE @ 37 (3.946570154), JUN @ 42 (3.928420791), SOX9 @ 50 (3.856009024), ERBB2 @ 53 (3.843354357), MYC @ 56 (3.825986802), TRAF6 @ 60 (3.802540496), TP53BP1 @ 78 (3.725074195), NPM1 @ 79 (3.723229211), CDK2 @ 89 (3.699623682), CLTC @ 98 (3.665966184)
CD4	815	2.86862	FOXP3 @ 40 (3.94032475), CTNNB1 @ 42 (3.926547961), HSP90AB1 @ 47 (3.89559168), NPM1 @ 70 (3.818434018), SRC @ 72 (3.815262485), PLCG1 @ 73 (3.813392608), STAT3 @ 92 (3.744179493), INS @ 94 (3.741981928)	IRF3	734	2.9356	EP300 @ 3 (4.566455535), NRF1 @ 22 (4.046253517), CTNNB1 @ 23 (4.032609254), NFKB1 @ 24 (4.021122149), IRF1 @ 39 (3.937384347), JUN @ 42 (3.928420791), RELA @ 55 (3.832644555), TRAF6 @ 60 (3.802540496), PRKACA @ 69 (3.762362936), STAT1 @ 72 (3.759329862), HSP90AB1 @ 77 (3.725182879), XRCC6 @ 80 (3.718531754), AKT1 @ 82 (3.716718023), HSP90AA1 @ 87 (3.706481498)
SOS2	824	2.86572	EGFR @ 18 (4.255273461), GRB2 @ 21 (4.184991908), NRAS @ 41 (3.934319021), KRAS @ 43 (3.922588159), HRAS @ 55 (3.85675947), SRC @ 72 (3.815262485), PLCG1 @ 73 (3.813392608), SHC1 @ 89 (3.749321692)	HSP90B1	742	2.92821	EGFR @ 8 (4.259252678), SMARCA4 @ 27 (4.004652833), H2AX @ 33 (3.978872976), JUN @ 42 (3.928420791), MDM2 @ 47 (3.863162591), ERBB2 @ 53 (3.843354357), AR @ 64 (3.786837043), PRKACA @ 69 (3.762362936), HSP90AB1 @ 77 (3.725182879), AKT1 @ 82 (3.716718023), HSP90AA1 @ 87 (3.706481498), CDK2 @ 89 (3.699623682)
FANCM	827	2.86481	FANCC @ 83 (3.776114382), APP @ 91 (3.745785722)	UBE2N	745	2.92787	TP53 @ 7 (4.263878027), ELAVL1 @ 12 (4.178507033), BRCA1 @ 14 (4.109727894), NRF1 @ 22 (4.046253517), NFKB1 @ 24 (4.021122149), H2AX @ 33 (3.978872976), RPS27A @ 35 (3.95946954), UBA52 @ 41 (3.930125003), MDM2 @ 47 (3.863162591), ATM @ 59 (3.803938404), TRAF6 @ 60 (3.802540496), NBN @ 68 (3.766088409), TP53BP1 @ 78 (3.725074195), XRCC6 @ 80 (3.718531754), HSP90AA1 @ 87 (3.706481498), CDK2 @ 89 (3…
SKP1	830	2.86392	CDK2 @ 3 (4.692024128), TP53 @ 29 (4.011818792), CTNNB1 @ 42 (3.926547961), EP300 @ 44 (3.908165976), HSP90AB1 @ 47 (3.89559168), UBA52 @ 58 (3.849143067), RPS27A @ 64 (3.841632945), TERF1 @ 65 (3.835912394)	HNRNPA2B1	749	2.92528	ERBB3 @ 2 (4.731127927), ELAVL1 @ 12 (4.178507033), BRCA1 @ 14 (4.109727894), CTNNB1 @ 23 (4.032609254), NFKB1 @ 24 (4.021122149), H2AX @ 33 (3.978872976), RPS27A @ 35 (3.95946954), YWHAE @ 37 (3.946570154), CDK9 @ 40 (3.936164117), UBA52 @ 41 (3.930125003), JUN @ 42 (3.928420791), MYC @ 56 (3.825986802), GRB2 @ 65 (3.770730971), HSP90AB1 @ 77 (3.725182879), NPM1 @ 79 (3.723229211), RAD51 @ 85 (3…
CENPS	832	2.86226	FANCC @ 83 (3.776114382), APP @ 91 (3.745785722)	RPLP0	760	2.91821	RPS26 @ 4 (4.467848456), TP53 @ 7 (4.263878027), RPS27A @ 35 (3.95946954), YWHAE @ 37 (3.946570154), UBA52 @ 41 (3.930125003), JUN @ 42 (3.928420791), CDH1 @ 48 (3.861344958), HSP90AB1 @ 77 (3.725182879), NPM1 @ 79 (3.723229211), MED1 @ 84 (3.711224374), HSP90AA1 @ 87 (3.706481498), CDK2 @ 89 (3.699623682), ESR1 @ 95 (3.677494751)
BCL2L1	836	2.86085	IKZF3 @ 16 (4.29678545), TP53 @ 29 (4.011818792), CDK1 @ 36 (3.960479767), CTNNB1 @ 42 (3.926547961), KRAS @ 43 (3.922588159), CYCS @ 81 (3.787614979), STAT3 @ 92 (3.744179493)	CCL2	765	2.91726	NFKB1 @ 24 (4.021122149), IRF1 @ 39 (3.937384347), JUN @ 42 (3.928420791), RELA @ 55 (3.832644555), STAT3 @ 75 (3.739433125)
CAMK2B	838	2.86031	EP300 @ 44 (3.908165976), HSP90AB1 @ 47 (3.89559168), PLCG1 @ 73 (3.813392608), YWHAB @ 75 (3.807771122), PLCG2 @ 98 (3.731445794)	FAAP100	768	2.91586	RPS27A @ 35 (3.95946954), UBA52 @ 41 (3.930125003)
RAG1	841	2.85882	KPNA2 @ 20 (4.185288434), HSP90AB1 @ 47 (3.89559168), PLCG1 @ 73 (3.813392608), FOXO1 @ 90 (3.74627242)	LYN	782	2.90342	TP53 @ 7 (4.263878027), EGFR @ 8 (4.259252678), ELAVL1 @ 12 (4.178507033), CDK1 @ 18 (4.078436677), SRC @ 32 (3.98269232), AR @ 64 (3.786837043), GRB2 @ 65 (3.770730971), STAT1 @ 72 (3.759329862), STAT3 @ 75 (3.739433125), HSP90AB1 @ 77 (3.725182879), AKT1 @ 82 (3.716718023), HSP90AA1 @ 87 (3.706481498), CDK2 @ 89 (3.699623682)
FANCB	845	2.85774	FANCC @ 83 (3.776114382)	BCL2	785	2.90048	EP300 @ 3 (4.566455535), TP53 @ 7 (4.263878027), BRCA1 @ 14 (4.109727894), CDK1 @ 18 (4.078436677), NFKB1 @ 24 (4.021122149), H3C13 @ 28 (3.995298939), H3C12 @ 30 (3.990523587), FOXP3 @ 34 (3.966832631), H3-3B @ 54 (3.833825465), RELA @ 55 (3.832644555), MYC @ 56 (3.825986802), PRKACA @ 69 (3.762362936), STAT3 @ 75 (3.739433125), AKT1 @ 82 (3.716718023), KEAP1 @ 83 (3.711971154), HSP90AA1 @ 87 (3…
NUP98	847	2.85644	CDK2 @ 3 (4.692024128), CDK1 @ 36 (3.960479767), CTNNB1 @ 42 (3.926547961), EP300 @ 44 (3.908165976), NPM1 @ 70 (3.818434018)	MYD88	808	2.88452	NFKB1 @ 24 (4.021122149), SRC @ 32 (3.98269232), YWHAE @ 37 (3.946570154), IRF1 @ 39 (3.937384347), MDM2 @ 47 (3.863162591), RELA @ 55 (3.832644555), TRAF6 @ 60 (3.802540496), AKT1 @ 82 (3.716718023), HSP90AA1 @ 87 (3.706481498)
STAT5A	858	2.84929	INSR @ 10 (4.567054143), EGFR @ 18 (4.255273461), GRB2 @ 21 (4.184991908), FOXP3 @ 40 (3.94032475), EP300 @ 44 (3.908165976), NPM1 @ 70 (3.818434018), SRC @ 72 (3.815262485), ERBB4 @ 84 (3.769879596), LEF1 @ 87 (3.764766052), SHC1 @ 89 (3.749321692), STAT3 @ 92 (3.744179493)	STAT5A	825	2.87433	EP300 @ 3 (4.566455535), EGFR @ 8 (4.259252678), BRCA1 @ 14 (4.109727894), NFKB1 @ 24 (4.021122149), SMARCA4 @ 27 (4.004652833), ERBB4 @ 29 (3.99164713), SRC @ 32 (3.98269232), FOXP3 @ 34 (3.966832631), JUN @ 42 (3.928420791), HDAC1 @ 45 (3.875037284), EZH2 @ 49 (3.859099803), GRB2 @ 65 (3.770730971), STAT1 @ 72 (3.759329862), STAT3 @ 75 (3.739433125), NPM1 @ 79 (3.723229211), AKT1 @ 82 (3.716718…
KPNA1	867	2.84531	EGFR @ 18 (4.255273461), KPNA2 @ 20 (4.185288434), NPM1 @ 70 (3.818434018), LEF1 @ 87 (3.764766052), STAT3 @ 92 (3.744179493)	MAPK9	827	2.87286	TP53 @ 7 (4.263878027), EGFR @ 8 (4.259252678), APP @ 20 (4.06357256), CTNNB1 @ 23 (4.032609254), NFKB1 @ 24 (4.021122149), SRC @ 32 (3.98269232), JUN @ 42 (3.928420791), HDAC1 @ 45 (3.875037284), MDM2 @ 47 (3.863162591), RELA @ 55 (3.832644555), MYC @ 56 (3.825986802), TRAF6 @ 60 (3.802540496), GRB2 @ 65 (3.770730971), STAT3 @ 75 (3.739433125), MED1 @ 84 (3.711224374), ESR1 @ 95 (3.677494751)
FAAP20	868	2.84524	FANCC @ 83 (3.776114382)	P4HB	829	2.87169	EGFR @ 8 (4.259252678), NRF1 @ 22 (4.046253517), H2AX @ 33 (3.978872976), JUN @ 42 (3.928420791), EZH2 @ 49 (3.859099803), HSP90AB1 @ 77 (3.725182879), HSP90AA1 @ 87 (3.706481498), CDK2 @ 89 (3.699623682)
CENPX	870	2.84418	TP53 @ 29 (4.011818792), FANCC @ 83 (3.776114382)	NCAM1	835	2.86835	EGFR @ 8 (4.259252678), FOXP3 @ 34 (3.966832631), STAT1 @ 72 (3.759329862)
HSPA1A	876	2.84062	CDK2 @ 3 (4.692024128), EGFR @ 18 (4.255273461), GRB2 @ 21 (4.184991908), TP53 @ 29 (4.011818792), YWHAE @ 31 (4.000171791), FOXP3 @ 40 (3.94032475), CTNNB1 @ 42 (3.926547961), GRK2 @ 45 (3.906377942), HSP90AB1 @ 47 (3.89559168), PIK3R2 @ 57 (3.849769814), RPS27A @ 64 (3.841632945), CLTC @ 68 (3.829350917), YWHAB @ 75 (3.807771122), FANCC @ 83 (3.776114382), SHC1 @ 89 (3.749321692)	YBX1	842	2.8638	EP300 @ 3 (4.566455535), TP53 @ 7 (4.263878027), EGFR @ 8 (4.259252678), ELAVL1 @ 12 (4.178507033), BRCA1 @ 14 (4.109727894), CTNNB1 @ 23 (4.032609254), IRF1 @ 39 (3.937384347), CDK9 @ 40 (3.936164117), JUN @ 42 (3.928420791), EZH2 @ 49 (3.859099803), MYC @ 56 (3.825986802), TRAF6 @ 60 (3.802540496), SIRT1 @ 61 (3.802094612), NPM1 @ 79 (3.723229211), XRCC6 @ 80 (3.718531754), AKT1 @ 82 (3.7167180…
EIF2S1	888	2.83555	RPS26 @ 4 (4.685311238), RPS27A @ 64 (3.841632945), NPM1 @ 70 (3.818434018)	STAT5B	846	2.86156	EP300 @ 3 (4.566455535), EGFR @ 8 (4.259252678), APP @ 20 (4.06357256), NFKB1 @ 24 (4.021122149), SMARCA4 @ 27 (4.004652833), ERBB4 @ 29 (3.99164713), SRC @ 32 (3.98269232), FOXP3 @ 34 (3.966832631), EZH2 @ 49 (3.859099803), GRB2 @ 65 (3.770730971), STAT1 @ 72 (3.759329862), STAT3 @ 75 (3.739433125), AKT1 @ 82 (3.716718023)
HSP90B1	896	2.83193	CDK2 @ 3 (4.692024128), EGFR @ 18 (4.255273461), GRK2 @ 45 (3.906377942), HSP90AB1 @ 47 (3.89559168), TERF2 @ 48 (3.885006348), TERF1 @ 65 (3.835912394), ERBB2 @ 67 (3.830356053), FANCC @ 83 (3.776114382)	FLNA	850	2.86043	ERBB3 @ 2 (4.731127927), BRCA1 @ 14 (4.109727894), CDK1 @ 18 (4.078436677), SRC @ 32 (3.98269232), JUN @ 42 (3.928420791), MYC @ 56 (3.825986802), AR @ 64 (3.786837043), GRB2 @ 65 (3.770730971), PRKACA @ 69 (3.762362936), HSP90AB1 @ 77 (3.725182879), TP53BP1 @ 78 (3.725074195), NPM1 @ 79 (3.723229211), AKT1 @ 82 (3.716718023), HSP90AA1 @ 87 (3.706481498), CDK2 @ 89 (3.699623682), ESR1 @ 95 (3.677…
GAB2	897	2.83147	INSR @ 10 (4.567054143), EGFR @ 18 (4.255273461), GRB2 @ 21 (4.184991908), YWHAE @ 31 (4.000171791), PIK3CA @ 49 (3.87790566), PIK3R2 @ 57 (3.849769814), ERBB2 @ 67 (3.830356053), SRC @ 72 (3.815262485), PLCG1 @ 73 (3.813392608), YWHAB @ 75 (3.807771122), PIK3CD @ 76 (3.806903236), PIK3CB @ 79 (3.788819698), PIK3R3 @ 88 (3.750814494), SHC1 @ 89 (3.749321692), PLCG2 @ 98 (3.731445794)	AKT2	851	2.85959	TP53 @ 7 (4.263878027), BRCA1 @ 14 (4.109727894), APP @ 20 (4.06357256), NRF1 @ 22 (4.046253517), CTNNB1 @ 23 (4.032609254), SRC @ 32 (3.98269232), JUN @ 42 (3.928420791), MDM2 @ 47 (3.863162591), FSHR @ 58 (3.813411806), HSP90AB1 @ 77 (3.725182879), AKT1 @ 82 (3.716718023), HSP90AA1 @ 87 (3.706481498), ESR1 @ 95 (3.677494751)
YES1	912	2.82357	YAP1 @ 8 (4.590383402), EGFR @ 18 (4.255273461), GRB2 @ 21 (4.184991908), CDH1 @ 26 (4.048973937), NRAS @ 41 (3.934319021), CTNNB1 @ 42 (3.926547961), KRAS @ 43 (3.922588159), HSP90AB1 @ 47 (3.89559168), HRAS @ 55 (3.85675947), NPM1 @ 70 (3.818434018), SRC @ 72 (3.815262485), ERBB4 @ 84 (3.769879596), PIK3R3 @ 88 (3.750814494), SHC1 @ 89 (3.749321692), PLCG2 @ 98 (3.731445794)	IL6	856	2.85819	EGFR @ 8 (4.259252678), NFKB1 @ 24 (4.021122149), FOXP3 @ 34 (3.966832631), ZBTB16 @ 38 (3.943619187), JUN @ 42 (3.928420791), RELA @ 55 (3.832644555), STAT1 @ 72 (3.759329862), STAT3 @ 75 (3.739433125)
FANCA	913	2.8229	GRB2 @ 21 (4.184991908), CDK1 @ 36 (3.960479767), CTNNB1 @ 42 (3.926547961), HSP90AB1 @ 47 (3.89559168), NPM1 @ 70 (3.818434018), SRC @ 72 (3.815262485), PLCG1 @ 73 (3.813392608), FANCC @ 83 (3.776114382)	UBE2D1	865	2.8543	EP300 @ 3 (4.566455535), TP53 @ 7 (4.263878027), BRCA1 @ 14 (4.109727894), YAP1 @ 15 (4.103703234), CTNNB1 @ 23 (4.032609254), RPS27A @ 35 (3.95946954), UBA52 @ 41 (3.930125003), MDM2 @ 47 (3.863162591), RELA @ 55 (3.832644555), TRAF6 @ 60 (3.802540496), NBN @ 68 (3.766088409)
CAMK2A	920	2.82055	EGFR @ 18 (4.255273461), CTNNB1 @ 42 (3.926547961), EP300 @ 44 (3.908165976), HSP90AB1 @ 47 (3.89559168), PLCG1 @ 73 (3.813392608), YWHAB @ 75 (3.807771122), PLCG2 @ 98 (3.731445794)	FBXW11	868	2.85129	YAP1 @ 15 (4.103703234), CTNNB1 @ 23 (4.032609254), NFKB1 @ 24 (4.021122149), YWHAE @ 37 (3.946570154), MDM2 @ 47 (3.863162591), EZH2 @ 49 (3.859099803), RELA @ 55 (3.832644555), HSP90AB1 @ 77 (3.725182879), KEAP1 @ 83 (3.711971154), HSP90AA1 @ 87 (3.706481498), CLTC @ 98 (3.665966184)
STAT5B	931	2.81778	INSR @ 10 (4.567054143), EGFR @ 18 (4.255273461), GRB2 @ 21 (4.184991908), FOXP3 @ 40 (3.94032475), EP300 @ 44 (3.908165976), SRC @ 72 (3.815262485), ERBB4 @ 84 (3.769879596), SHC1 @ 89 (3.749321692), APP @ 91 (3.745785722), STAT3 @ 92 (3.744179493)	FAAP24	869	2.84891	BRCA1 @ 14 (4.109727894)
EIF4A1	946	2.81285	CDK2 @ 3 (4.692024128), RPS26 @ 4 (4.685311238), GRB2 @ 21 (4.184991908), HSP90AB1 @ 47 (3.89559168), RPS27A @ 64 (3.841632945), NPM1 @ 70 (3.818434018)	MMP9	872	2.84597	CTNNB1 @ 23 (4.032609254), SRC @ 32 (3.98269232), JUN @ 42 (3.928420791), CDH1 @ 48 (3.861344958), STAT3 @ 75 (3.739433125)
PTPN1	952	2.81006	INSR @ 10 (4.567054143), EGFR @ 18 (4.255273461), GRB2 @ 21 (4.184991908), IGF1R @ 23 (4.061111546), CDH1 @ 26 (4.048973937), CDK1 @ 36 (3.960479767), CTNNB1 @ 42 (3.926547961), SRC @ 72 (3.815262485), STAT3 @ 92 (3.744179493)	IRF9	876	2.84251	TP53 @ 7 (4.263878027), ELAVL1 @ 12 (4.178507033), NFKB1 @ 24 (4.021122149), IRF1 @ 39 (3.937384347), RELA @ 55 (3.832644555), STAT1 @ 72 (3.759329862), STAT3 @ 75 (3.739433125)
FAAP100	958	2.80868	UBA52 @ 58 (3.849143067), RPS27A @ 64 (3.841632945), FANCC @ 83 (3.776114382)	CHUK	883	2.83831	EP300 @ 3 (4.566455535), TP53 @ 7 (4.263878027), ELAVL1 @ 12 (4.178507033), CTNNB1 @ 23 (4.032609254), NFKB1 @ 24 (4.021122149), H3C13 @ 28 (3.995298939), H3C12 @ 30 (3.990523587), SRC @ 32 (3.98269232), H3-3B @ 54 (3.833825465), RELA @ 55 (3.832644555), MYC @ 56 (3.825986802), ATM @ 59 (3.803938404), TRAF6 @ 60 (3.802540496), HSP90AB1 @ 77 (3.725182879), AKT1 @ 82 (3.716718023), KEAP1 @ 83 (3.71…
RAF1	961	2.80683	INSR @ 10 (4.567054143), EGFR @ 18 (4.255273461), GRB2 @ 21 (4.184991908), YWHAE @ 31 (4.000171791), NRAS @ 41 (3.934319021), KRAS @ 43 (3.922588159), HSP90AB1 @ 47 (3.89559168), PIK3CA @ 49 (3.87790566), HRAS @ 55 (3.85675947), PIK3R2 @ 57 (3.849769814), SRC @ 72 (3.815262485), YWHAB @ 75 (3.807771122), PIK3CD @ 76 (3.806903236), PIK3CB @ 79 (3.788819698), PIK3R3 @ 88 (3.750814494), STAT3 @ 92 (…	PPP2CB	884	2.83702	TP53 @ 7 (4.263878027), EGFR @ 8 (4.259252678), YAP1 @ 15 (4.103703234), NFKB1 @ 24 (4.021122149), SRC @ 32 (3.98269232), ERBB2 @ 53 (3.843354357), RELA @ 55 (3.832644555), TRAF6 @ 60 (3.802540496), AKT1 @ 82 (3.716718023)
TRAF2	968	2.8042	EGFR @ 18 (4.255273461), CYB5R2 @ 37 (3.950721474), EP300 @ 44 (3.908165976), HSP90AB1 @ 47 (3.89559168), PIK3CA @ 49 (3.87790566), PIK3R2 @ 57 (3.849769814), UBA52 @ 58 (3.849143067), RPS27A @ 64 (3.841632945), CLTC @ 68 (3.829350917), PIK3CD @ 76 (3.806903236), PIK3CB @ 79 (3.788819698), FHL2 @ 82 (3.784994951), PIK3R3 @ 88 (3.750814494)	CAMK2A	889	2.832	EP300 @ 3 (4.566455535), EGFR @ 8 (4.259252678), CTNNB1 @ 23 (4.032609254), HDAC1 @ 45 (3.875037284), STAT1 @ 72 (3.759329862), HSP90AB1 @ 77 (3.725182879), AKT1 @ 82 (3.716718023), HSP90AA1 @ 87 (3.706481498), YWHAB @ 93 (3.686814642)
IL6ST	975	2.80087	ERBB3 @ 1 (5), GRB2 @ 21 (4.184991908), PIK3CA @ 49 (3.87790566), PIK3R2 @ 57 (3.849769814), ERBB2 @ 67 (3.830356053), PIK3CD @ 76 (3.806903236), PIK3CB @ 79 (3.788819698), PIK3R3 @ 88 (3.750814494), SHC1 @ 89 (3.749321692), STAT3 @ 92 (3.744179493)	EIF2AK2	893	2.83121	RPS26 @ 4 (4.467848456), TP53 @ 7 (4.263878027), CHEK2 @ 10 (4.196264648), ELAVL1 @ 12 (4.178507033), CDK1 @ 18 (4.078436677), RPS27A @ 35 (3.95946954), JUN @ 42 (3.928420791), TRAF6 @ 60 (3.802540496), STAT1 @ 72 (3.759329862), STAT3 @ 75 (3.739433125), HSP90AB1 @ 77 (3.725182879), NPM1 @ 79 (3.723229211), HSP90AA1 @ 87 (3.706481498)
ABCE1	980	2.79726	RPS26 @ 4 (4.685311238), UBA52 @ 58 (3.849143067), RPS27A @ 64 (3.841632945)	FANCG	906	2.82539	BRCA1 @ 14 (4.109727894), CDK1 @ 18 (4.078436677)
MMP3	983	2.79647	EGFR @ 18 (4.255273461), CDH1 @ 26 (4.048973937), DCN @ 53 (3.863807295), STAT3 @ 92 (3.744179493)	FANCB	910	2.82391	BRCA1 @ 14 (4.109727894)
H3C3	991	2.79417	TP53 @ 29 (4.011818792), EP300 @ 44 (3.908165976), UBA52 @ 58 (3.849143067), CBX5 @ 60 (3.848006823), RPS27A @ 64 (3.841632945)	HLA-C	913	2.82296	MAPRE1 @ 6 (4.289142824), STAT1 @ 72 (3.759329862), CLTC @ 98 (3.665966184)
SOCS1	993	2.79344	INSR @ 10 (4.567054143), EGFR @ 18 (4.255273461), GRB2 @ 21 (4.184991908), IGF1R @ 23 (4.061111546), TP53 @ 29 (4.011818792), PIK3R2 @ 57 (3.849769814), ERBB2 @ 67 (3.830356053), PIK3R3 @ 88 (3.750814494), STAT3 @ 92 (3.744179493)	FOXO3	914	2.82096	EP300 @ 3 (4.566455535), TP53 @ 7 (4.263878027), ELAVL1 @ 12 (4.178507033), BRCA1 @ 14 (4.109727894), CDK1 @ 18 (4.078436677), APP @ 20 (4.06357256), CTNNB1 @ 23 (4.032609254), NFKB1 @ 24 (4.021122149), PNKP @ 26 (4.016412119), H2AX @ 33 (3.978872976), YWHAE @ 37 (3.946570154), JUN @ 42 (3.928420791), MDM2 @ 47 (3.863162591), MYC @ 56 (3.825986802), ATM @ 59 (3.803938404), SIRT1 @ 61 (3.802094612…
ZEB1	995	2.79237	YAP1 @ 8 (4.590383402), TP53 @ 29 (4.011818792), CTBP1 @ 34 (3.965358784), EP300 @ 44 (3.908165976), STAT3 @ 92 (3.744179493)	RELB	922	2.81771	KPNA2 @ 16 (4.098579501), CDK1 @ 18 (4.078436677), NFKB1 @ 24 (4.021122149), SMARCA4 @ 27 (4.004652833), HDAC1 @ 45 (3.875037284), EZH2 @ 49 (3.859099803), RELA @ 55 (3.832644555), TRAF6 @ 60 (3.802540496), SIRT1 @ 61 (3.802094612), STAT1 @ 72 (3.759329862), CLTC @ 98 (3.665966184)
EIF2S2	996	2.7921	RPS26 @ 4 (4.685311238), TP53 @ 29 (4.011818792), RPS27A @ 64 (3.841632945), APP @ 91 (3.745785722)	CUL5	935	2.81133	ELAVL1 @ 12 (4.178507033), NFKB1 @ 24 (4.021122149), RPS27A @ 35 (3.95946954), JUN @ 42 (3.928420791), ERBB2 @ 53 (3.843354357), TRAF6 @ 60 (3.802540496), DNMT3B @ 66 (3.768542304), PRKACA @ 69 (3.762362936), HSP90AB1 @ 77 (3.725182879), NPM1 @ 79 (3.723229211), XRCC6 @ 80 (3.718531754), HSP90AA1 @ 87 (3.706481498), CLTC @ 98 (3.665966184)
LCN2	998	2.79092	POMC @ 56 (3.852283734), APP @ 91 (3.745785722), STAT3 @ 92 (3.744179493)	CCL5	936	2.81073	CHEK2 @ 10 (4.196264648), NFKB1 @ 24 (4.021122149), SRC @ 32 (3.98269232), JUN @ 42 (3.928420791), CDH1 @ 48 (3.861344958), RELA @ 55 (3.832644555), GRB2 @ 65 (3.770730971), STAT3 @ 75 (3.739433125)
FANCF	1002	2.78989	FANCC @ 83 (3.776114382)	EGR1	943	2.8084	ERBB3 @ 2 (4.731127927), EP300 @ 3 (4.566455535), TP53 @ 7 (4.263878027), YAP1 @ 15 (4.103703234), CTNNB1 @ 23 (4.032609254), HDAC2 @ 31 (3.989763953), JUN @ 42 (3.928420791), HDAC1 @ 45 (3.875037284), MDM2 @ 47 (3.863162591), EZH2 @ 49 (3.859099803), RELA @ 55 (3.832644555), MYC @ 56 (3.825986802), AR @ 64 (3.786837043), STAT1 @ 72 (3.759329862), STAT3 @ 75 (3.739433125), AKT1 @ 82 (3.716718023)
IL2	1010	2.78755	EGFR @ 18 (4.255273461), RUNX1 @ 19 (4.230547681), FOXP3 @ 40 (3.94032475), KRAS @ 43 (3.922588159), SHC1 @ 89 (3.749321692)	GH1	959	2.79864	RPS26 @ 4 (4.467848456), MAPRE1 @ 6 (4.289142824), NPM1 @ 79 (3.723229211)
TGFB1	1016	2.78542	EGFR @ 18 (4.255273461), IGF1R @ 23 (4.061111546), CDH1 @ 26 (4.048973937), TP53 @ 29 (4.011818792), YWHAE @ 31 (4.000171791), FOXP3 @ 40 (3.94032475), CTNNB1 @ 42 (3.926547961), EP300 @ 44 (3.908165976), DCN @ 53 (3.863807295), ERBB2 @ 67 (3.830356053), SRC @ 72 (3.815262485), APP @ 91 (3.745785722), STAT3 @ 92 (3.744179493)	ILF2	961	2.79765	EP300 @ 3 (4.566455535), RPS26 @ 4 (4.467848456), EGFR @ 8 (4.259252678), ELAVL1 @ 12 (4.178507033), RAD50 @ 19 (4.067545896), H2AX @ 33 (3.978872976), YWHAE @ 37 (3.946570154), CDK9 @ 40 (3.936164117), JUN @ 42 (3.928420791), EZH2 @ 49 (3.859099803), RELA @ 55 (3.832644555), XRCC6 @ 80 (3.718531754), CDK2 @ 89 (3.699623682), ESR1 @ 95 (3.677494751)
LCK	1020	2.78495	EGFR @ 18 (4.255273461), GRB2 @ 21 (4.184991908), IKZF1 @ 28 (4.018602888), FOXP3 @ 40 (3.94032475), NRAS @ 41 (3.934319021), KRAS @ 43 (3.922588159), MUC1 @ 46 (3.897446897), HSP90AB1 @ 47 (3.89559168), PIK3CA @ 49 (3.87790566), PIK3R2 @ 57 (3.849769814), SRC @ 72 (3.815262485), PLCG1 @ 73 (3.813392608), SHC1 @ 89 (3.749321692), STAT3 @ 92 (3.744179493), PLCG2 @ 98 (3.731445794)	FANCF	964	2.79449	BRCA1 @ 14 (4.109727894)
ATF2	1023	2.78313	CDK2 @ 3 (4.692024128), TP53 @ 29 (4.011818792), CTNNB1 @ 42 (3.926547961), EP300 @ 44 (3.908165976), HSP90AB1 @ 47 (3.89559168), YWHAB @ 75 (3.807771122), CYCS @ 81 (3.787614979), APP @ 91 (3.745785722), SQOR @ 93 (3.74216698)	VAMP2	971	2.79079	APP @ 20 (4.06357256), NRF1 @ 22 (4.046253517), UBA52 @ 41 (3.930125003), CLTC @ 98 (3.665966184)
H3C6	1028	2.78268	TP53 @ 29 (4.011818792), EP300 @ 44 (3.908165976), UBA52 @ 58 (3.849143067), CBX5 @ 60 (3.848006823), RPS27A @ 64 (3.841632945)	HSPA1A	978	2.78863	TP53 @ 7 (4.263878027), EGFR @ 8 (4.259252678), ELAVL1 @ 12 (4.178507033), CTNNB1 @ 23 (4.032609254), NFKB1 @ 24 (4.021122149), H2AX @ 33 (3.978872976), FOXP3 @ 34 (3.966832631), RPS27A @ 35 (3.95946954), YWHAE @ 37 (3.946570154), IRF1 @ 39 (3.937384347), CDK9 @ 40 (3.936164117), EZH2 @ 49 (3.859099803), SOX9 @ 50 (3.856009024), RELA @ 55 (3.832644555), MYC @ 56 (3.825986802), AR @ 64 (3.78683704…
H3C2	1030	2.78195	TP53 @ 29 (4.011818792), EP300 @ 44 (3.908165976), UBA52 @ 58 (3.849143067), CBX5 @ 60 (3.848006823), RPS27A @ 64 (3.841632945)	ATF2	983	2.78649	EP300 @ 3 (4.566455535), TP53 @ 7 (4.263878027), APP @ 20 (4.06357256), CTNNB1 @ 23 (4.032609254), H2AX @ 33 (3.978872976), JUN @ 42 (3.928420791), EZH2 @ 49 (3.859099803), ATM @ 59 (3.803938404), AR @ 64 (3.786837043), NBN @ 68 (3.766088409), PRKACA @ 69 (3.762362936), HSP90AB1 @ 77 (3.725182879), AKT1 @ 82 (3.716718023), HSP90AA1 @ 87 (3.706481498), CDK2 @ 89 (3.699623682), RAB7A @ 91 (3.694059…
H3C11	1045	2.7779	TP53 @ 29 (4.011818792), EP300 @ 44 (3.908165976), UBA52 @ 58 (3.849143067), CBX5 @ 60 (3.848006823), RPS27A @ 64 (3.841632945)	IL4	999	2.77744	EGFR @ 8 (4.259252678), IRF1 @ 39 (3.937384347), STAT3 @ 75 (3.739433125)
SDC1	1046	2.7778	DCN @ 53 (3.863807295), ERBB2 @ 67 (3.830356053), APP @ 91 (3.745785722)	PRKCD	1010	2.77352	EP300 @ 3 (4.566455535), TP53 @ 7 (4.263878027), EGFR @ 8 (4.259252678), ELAVL1 @ 12 (4.178507033), APP @ 20 (4.06357256), CTNNB1 @ 23 (4.032609254), SRC @ 32 (3.98269232), CDK9 @ 40 (3.936164117), STAT1 @ 72 (3.759329862), STAT3 @ 75 (3.739433125), HSP90AB1 @ 77 (3.725182879), NPM1 @ 79 (3.723229211), AKT1 @ 82 (3.716718023), HSP90AA1 @ 87 (3.706481498), YWHAB @ 93 (3.686814642)
ABL2	1047	2.77734	ERBB3 @ 1 (5), EGFR @ 18 (4.255273461), GRB2 @ 21 (4.184991908), HRAS @ 55 (3.85675947), ERBB2 @ 67 (3.830356053), SRC @ 72 (3.815262485), PLCG1 @ 73 (3.813392608), ERBB4 @ 84 (3.769879596)	RANBP2	1011	2.77251	TP53 @ 7 (4.263878027), KPNA2 @ 16 (4.098579501), CDK1 @ 18 (4.078436677), CTNNB1 @ 23 (4.032609254), HDAC2 @ 31 (3.989763953), JUN @ 42 (3.928420791), MDM2 @ 47 (3.863162591), ERBB2 @ 53 (3.843354357), MYC @ 56 (3.825986802), SIRT1 @ 61 (3.802094612), NPM1 @ 79 (3.723229211), CLTC @ 98 (3.665966184)
H3C7	1050	2.77631	TP53 @ 29 (4.011818792), EP300 @ 44 (3.908165976), UBA52 @ 58 (3.849143067), CBX5 @ 60 (3.848006823), RPS27A @ 64 (3.841632945)	EIF4A3	1023	2.76629	JUN @ 42 (3.928420791), H4C6 @ 52 (3.853376106), GRB2 @ 65 (3.770730971), BMPR1B @ 76 (3.725317326), H3-4 @ 88 (3.699941274), CDK2 @ 89 (3.699623682)
H3C10	1052	2.776	TP53 @ 29 (4.011818792), EP300 @ 44 (3.908165976), UBA52 @ 58 (3.849143067), CBX5 @ 60 (3.848006823), RPS27A @ 64 (3.841632945)	CAPZA1	1026	2.76418	MAPRE1 @ 6 (4.289142824), ELAVL1 @ 12 (4.178507033), JUN @ 42 (3.928420791), TRAF6 @ 60 (3.802540496), TP53BP1 @ 78 (3.725074195), YWHAB @ 93 (3.686814642)
H3C8	1055	2.77463	TP53 @ 29 (4.011818792), EP300 @ 44 (3.908165976), UBA52 @ 58 (3.849143067), CBX5 @ 60 (3.848006823), RPS27A @ 64 (3.841632945)	STAT6	1029	2.762	EP300 @ 3 (4.566455535), TP53 @ 7 (4.263878027), NFKB1 @ 24 (4.021122149), SRC @ 32 (3.98269232), IRF1 @ 39 (3.937384347), HDAC1 @ 45 (3.875037284), RELA @ 55 (3.832644555), MYC @ 56 (3.825986802), STAT1 @ 72 (3.759329862), STAT3 @ 75 (3.739433125), AKT1 @ 82 (3.716718023)
H3C4	1056	2.77411	TP53 @ 29 (4.011818792), EP300 @ 44 (3.908165976), UBA52 @ 58 (3.849143067), CBX5 @ 60 (3.848006823), RPS27A @ 64 (3.841632945)	IL2	1031	2.76046	EGFR @ 8 (4.259252678), NFKB1 @ 24 (4.021122149), FOXP3 @ 34 (3.966832631), JUN @ 42 (3.928420791), RELA @ 55 (3.832644555), RUNX1 @ 71 (3.759465655)
GH1	1058	2.77355	RPS26 @ 4 (4.685311238), NPM1 @ 70 (3.818434018), CYCS @ 81 (3.787614979), SHC1 @ 89 (3.749321692)	BECN1	1041	2.75568	TP53 @ 7 (4.263878027), EGFR @ 8 (4.259252678), ERBB2 @ 53 (3.843354357), TRAF6 @ 60 (3.802540496), STAT3 @ 75 (3.739433125), AKT1 @ 82 (3.716718023), HSP90AA1 @ 87 (3.706481498)
IL6	1061	2.77292	EGFR @ 18 (4.255273461), FOXP3 @ 40 (3.94032475), POMC @ 56 (3.852283734), STAT3 @ 92 (3.744179493)	RIGI	1069	2.74067	ELAVL1 @ 12 (4.178507033), NFKB1 @ 24 (4.021122149), SRC @ 32 (3.98269232), RPS27A @ 35 (3.95946954), IRF1 @ 39 (3.937384347), UBA52 @ 41 (3.930125003), RELA @ 55 (3.832644555), TRAF6 @ 60 (3.802540496), STAT1 @ 72 (3.759329862)
HNRNPF	1070	2.76802	CDK2 @ 3 (4.692024128), IKZF3 @ 16 (4.29678545), EGFR @ 18 (4.255273461), GRB2 @ 21 (4.184991908)	IRF7	1081	2.73407	EP300 @ 3 (4.566455535), NFKB1 @ 24 (4.021122149), JUN @ 42 (3.928420791), RELA @ 55 (3.832644555), TRAF6 @ 60 (3.802540496), STAT1 @ 72 (3.759329862)
FANCG	1088	2.76013	CDK1 @ 36 (3.960479767), FANCC @ 83 (3.776114382)	RAE1	1082	2.73391	ERBB3 @ 2 (4.731127927), YAP1 @ 15 (4.103703234), NRF1 @ 22 (4.046253517), JUN @ 42 (3.928420791), SOX2 @ 70 (3.761055665)
PRL	1089	2.75973	EGFR @ 18 (4.255273461), STAT3 @ 92 (3.744179493), INS @ 94 (3.741981928)	MMP2	1085	2.73171	CTNNB1 @ 23 (4.032609254), SRC @ 32 (3.98269232), CDH1 @ 48 (3.861344958), STAT3 @ 75 (3.739433125), HSP90AA1 @ 87 (3.706481498)
HLA-B	1107	2.7525	RPS26 @ 4 (4.685311238), NPM1 @ 70 (3.818434018), SRC @ 72 (3.815262485), CYCS @ 81 (3.787614979)	BIRC3	1086	2.73084	EGFR @ 8 (4.259252678), NFKB1 @ 24 (4.021122149), RPS27A @ 35 (3.95946954), IRF1 @ 39 (3.937384347), RELA @ 55 (3.832644555), TRAF6 @ 60 (3.802540496)
RELB	1108	2.75085	KPNA2 @ 20 (4.185288434), SIN3A @ 33 (3.966211795), CDK1 @ 36 (3.960479767), CLTC @ 68 (3.829350917)	IKBKB	1088	2.72822	TP53 @ 7 (4.263878027), CTNNB1 @ 23 (4.032609254), NFKB1 @ 24 (4.021122149), SRC @ 32 (3.98269232), JUN @ 42 (3.928420791), RELA @ 55 (3.832644555), MYC @ 56 (3.825986802), TRAF6 @ 60 (3.802540496), STAT3 @ 75 (3.739433125), HSP90AB1 @ 77 (3.725182879), AKT1 @ 82 (3.716718023), KEAP1 @ 83 (3.711971154), HSP90AA1 @ 87 (3.706481498), YWHAB @ 93 (3.686814642), CLTC @ 98 (3.665966184)
HSPA9	1115	2.74956	CDK2 @ 3 (4.692024128), TBPL1 @ 9 (4.587803787), EGFR @ 18 (4.255273461), GRB2 @ 21 (4.184991908), CDH1 @ 26 (4.048973937), TP53 @ 29 (4.011818792), GRK2 @ 45 (3.906377942), HSP90AB1 @ 47 (3.89559168), SHC1 @ 89 (3.749321692), APP @ 91 (3.745785722)	SOCS1	1089	2.7282	TP53 @ 7 (4.263878027), EGFR @ 8 (4.259252678), NRF1 @ 22 (4.046253517), ERBB2 @ 53 (3.843354357), RELA @ 55 (3.832644555), ATM @ 59 (3.803938404), TRAF6 @ 60 (3.802540496), GRB2 @ 65 (3.770730971), STAT1 @ 72 (3.759329862), STAT3 @ 75 (3.739433125)
RAP1B	1126	2.74471	TP53 @ 29 (4.011818792), PIK3CA @ 49 (3.87790566), HRAS @ 55 (3.85675947), PIK3R2 @ 57 (3.849769814), SRC @ 72 (3.815262485), PIK3CD @ 76 (3.806903236), PIK3CB @ 79 (3.788819698), PIK3R3 @ 88 (3.750814494), APP @ 91 (3.745785722)	BCL2L1	1109	2.7134	TP53 @ 7 (4.263878027), CDK1 @ 18 (4.078436677), CTNNB1 @ 23 (4.032609254), MDM2 @ 47 (3.863162591), RELA @ 55 (3.832644555), STAT3 @ 75 (3.739433125), AKT1 @ 82 (3.716718023), KEAP1 @ 83 (3.711971154)
FAAP24	1130	2.74356	FANCC @ 83 (3.776114382)	MMP3	1131	2.7021	EGFR @ 8 (4.259252678), NFKB1 @ 24 (4.021122149), CDH1 @ 48 (3.861344958), RELA @ 55 (3.832644555), STAT3 @ 75 (3.739433125)
TUBA3E	1140	2.73969	YWHAE @ 31 (4.000171791)	IFNA1	1132	2.70176	EGFR @ 8 (4.259252678), NFKB1 @ 24 (4.021122149), IRF1 @ 39 (3.937384347), RELA @ 55 (3.832644555), STAT1 @ 72 (3.759329862)
RBX1	1167	2.73031	CDK2 @ 3 (4.692024128), TP53 @ 29 (4.011818792), CTNNB1 @ 42 (3.926547961), UBA52 @ 58 (3.849143067), RPS27A @ 64 (3.841632945), APP @ 91 (3.745785722)	IFNB1	1134	2.7009	EGFR @ 8 (4.259252678), NFKB1 @ 24 (4.021122149), IRF1 @ 39 (3.937384347), RELA @ 55 (3.832644555), STAT1 @ 72 (3.759329862)
ILF2	1184	2.72379	CDK2 @ 3 (4.692024128), RPS26 @ 4 (4.685311238), EGFR @ 18 (4.255273461), YWHAE @ 31 (4.000171791), EP300 @ 44 (3.908165976)	IL10	1137	2.69932	EGFR @ 8 (4.259252678), STAT1 @ 72 (3.759329862), STAT3 @ 75 (3.739433125), AKT1 @ 82 (3.716718023)
IRF1	1195	2.71967	KPNA2 @ 20 (4.185288434), EP300 @ 44 (3.908165976), NPM1 @ 70 (3.818434018), STAT3 @ 92 (3.744179493)	UBE2D2	1142	2.69845	TP53 @ 7 (4.263878027), BRCA1 @ 14 (4.109727894), CTNNB1 @ 23 (4.032609254), NFKB1 @ 24 (4.021122149), RPS27A @ 35 (3.95946954), UBA52 @ 41 (3.930125003), MDM2 @ 47 (3.863162591), RELA @ 55 (3.832644555), TRAF6 @ 60 (3.802540496)
PTPN6	1198	2.71722	INSR @ 10 (4.567054143), EGFR @ 18 (4.255273461), GRB2 @ 21 (4.184991908), CTNNB1 @ 42 (3.926547961), PIK3CA @ 49 (3.87790566), PIK3R2 @ 57 (3.849769814), SRC @ 72 (3.815262485), PLCG1 @ 73 (3.813392608), PIK3CD @ 76 (3.806903236), PIK3CB @ 79 (3.788819698), PIK3R3 @ 88 (3.750814494), SHC1 @ 89 (3.749321692), STAT3 @ 92 (3.744179493)	PIN1	1144	2.69778	EP300 @ 3 (4.566455535), TP53 @ 7 (4.263878027), ELAVL1 @ 12 (4.178507033), YAP1 @ 15 (4.103703234), CDK1 @ 18 (4.078436677), APP @ 20 (4.06357256), CTNNB1 @ 23 (4.032609254), CDK9 @ 40 (3.936164117), JUN @ 42 (3.928420791), ERBB2 @ 53 (3.843354357), RELA @ 55 (3.832644555), MYC @ 56 (3.825986802), TRAF6 @ 60 (3.802540496), PRKACA @ 69 (3.762362936), STAT3 @ 75 (3.739433125), XRCC6 @ 80 (3.718531…
FOS	1201	2.7169	TBP @ 13 (4.487899762), EGFR @ 18 (4.255273461), RUNX1 @ 19 (4.230547681), TP53 @ 29 (4.011818792), CTNNB1 @ 42 (3.926547961), EP300 @ 44 (3.908165976), HRAS @ 55 (3.85675947), SRC @ 72 (3.815262485), YWHAB @ 75 (3.807771122), FOXO1 @ 90 (3.74627242), APP @ 91 (3.745785722), STAT3 @ 92 (3.744179493)	PPP2R1B	1145	2.69734	EGFR @ 8 (4.259252678), YAP1 @ 15 (4.103703234), CDK1 @ 18 (4.078436677), NFKB1 @ 24 (4.021122149), HDAC1 @ 45 (3.875037284), RELA @ 55 (3.832644555), STAT3 @ 75 (3.739433125), AKT1 @ 82 (3.716718023), RAB7A @ 91 (3.694059873)
BCL6	1208	2.71375	TP53 @ 29 (4.011818792), SIN3A @ 33 (3.966211795), CTBP1 @ 34 (3.965358784), FOXP3 @ 40 (3.94032475), CTNNB1 @ 42 (3.926547961), EP300 @ 44 (3.908165976), FOXO1 @ 90 (3.74627242), STAT3 @ 92 (3.744179493)	CXCL10	1149	2.69231	STAT3 @ 75 (3.739433125)
TNFRSF1A	1217	2.71146	EGFR @ 18 (4.255273461), GRB2 @ 21 (4.184991908), MUC1 @ 46 (3.897446897), PIK3CA @ 49 (3.87790566), UBA52 @ 58 (3.849143067), RPS27A @ 64 (3.841632945), CLTC @ 68 (3.829350917), SRC @ 72 (3.815262485), MADD @ 74 (3.812266803), STAT3 @ 92 (3.744179493)	CAMK2B	1154	2.69125	EP300 @ 3 (4.566455535), PRKACA @ 69 (3.762362936), STAT1 @ 72 (3.759329862), HSP90AB1 @ 77 (3.725182879), HSP90AA1 @ 87 (3.706481498), YWHAB @ 93 (3.686814642)
SOCS6	1228	2.70664	YAP1 @ 8 (4.590383402), INSR @ 10 (4.567054143), EGFR @ 18 (4.255273461), HSP90AB1 @ 47 (3.89559168), PIK3R2 @ 57 (3.849769814), PIK3R3 @ 88 (3.750814494), STAT3 @ 92 (3.744179493)	IFI35	1155	2.69109	RPS26 @ 4 (4.467848456), RPS27A @ 35 (3.95946954), UBA52 @ 41 (3.930125003), STAT1 @ 72 (3.759329862), MED1 @ 84 (3.711224374)
PPP2R1B	1229	2.70644	YAP1 @ 8 (4.590383402), EGFR @ 18 (4.255273461), CDK1 @ 36 (3.960479767), STAT3 @ 92 (3.744179493)	BIRC5	1167	2.68135	TP53 @ 7 (4.263878027), ELAVL1 @ 12 (4.178507033), CDK1 @ 18 (4.078436677), H3C13 @ 28 (3.995298939), H3C12 @ 30 (3.990523587), H2AX @ 33 (3.978872976), ERBB2 @ 53 (3.843354357), H3-3B @ 54 (3.833825465), MYC @ 56 (3.825986802), PRKACA @ 69 (3.762362936), STAT3 @ 75 (3.739433125), XRCC6 @ 80 (3.718531754), RAD51 @ 85 (3.708628165), HSP90AA1 @ 87 (3.706481498), H3-4 @ 88 (3.699941274), CDK2 @ 89 (…
NFKBIB	1241	2.70111	TBP @ 13 (4.487899762), KPNA2 @ 20 (4.185288434), HSP90AB1 @ 47 (3.89559168), CLTC @ 68 (3.829350917), APP @ 91 (3.745785722)	COL1A2	1168	2.68122	APP @ 20 (4.06357256)
IFI35	1248	2.69861	RPS26 @ 4 (4.685311238), UBA52 @ 58 (3.849143067), RPS27A @ 64 (3.841632945)	EIF4G1	1173	2.67902	RPS26 @ 4 (4.467848456), BRCA1 @ 14 (4.109727894), CDK1 @ 18 (4.078436677), NRF1 @ 22 (4.046253517), RPS27A @ 35 (3.95946954), JUN @ 42 (3.928420791), TRAF6 @ 60 (3.802540496), CDK2 @ 89 (3.699623682), ESR1 @ 95 (3.677494751)
TPR	1251	2.6973	CDK2 @ 3 (4.692024128), CDK1 @ 36 (3.960479767), HRAS @ 55 (3.85675947), NPM1 @ 70 (3.818434018), SHC1 @ 89 (3.749321692)	HLA-E	1174	2.6788	STAT1 @ 72 (3.759329862)
BIRC5	1252	2.69713	CDK2 @ 3 (4.692024128), TP53 @ 29 (4.011818792), CDK1 @ 36 (3.960479767), ERBB2 @ 67 (3.830356053), STAT3 @ 92 (3.744179493)	CRKL	1179	2.67667	ERBB3 @ 2 (4.731127927), EGFR @ 8 (4.259252678), ELAVL1 @ 12 (4.178507033), NRF1 @ 22 (4.046253517), ERBB4 @ 29 (3.99164713), SRC @ 32 (3.98269232), JUN @ 42 (3.928420791), ERBB2 @ 53 (3.843354357), GRB2 @ 65 (3.770730971)
ITGB2	1254	2.69677	EGFR @ 18 (4.255273461), PIK3CA @ 49 (3.87790566), PIK3R2 @ 57 (3.849769814), SRC @ 72 (3.815262485), YWHAB @ 75 (3.807771122), PIK3CD @ 76 (3.806903236), PIK3CB @ 79 (3.788819698), FHL2 @ 82 (3.784994951), PIK3R3 @ 88 (3.750814494)	EIF2S1	1180	2.67645	RPS26 @ 4 (4.467848456), ELAVL1 @ 12 (4.178507033), NRF1 @ 22 (4.046253517), RPS27A @ 35 (3.95946954), JUN @ 42 (3.928420791), TRAF6 @ 60 (3.802540496), NPM1 @ 79 (3.723229211), HSP90AA1 @ 87 (3.706481498)
CD44	1275	2.68514	EGFR @ 18 (4.255273461), TP53 @ 29 (4.011818792), EP300 @ 44 (3.908165976), ERBB2 @ 67 (3.830356053), SRC @ 72 (3.815262485), ERBB4 @ 84 (3.769879596), LEF1 @ 87 (3.764766052), STAT3 @ 92 (3.744179493)	PTPN6	1184	2.67147	EGFR @ 8 (4.259252678), CTNNB1 @ 23 (4.032609254), SRC @ 32 (3.98269232), IRF1 @ 39 (3.937384347), TRAF6 @ 60 (3.802540496), GRB2 @ 65 (3.770730971), STAT3 @ 75 (3.739433125), ESR1 @ 95 (3.677494751)
PTPRJ	1278	2.6835	INSR @ 10 (4.567054143), EGFR @ 18 (4.255273461), GRB2 @ 21 (4.184991908), CTNNB1 @ 42 (3.926547961), HRAS @ 55 (3.85675947), ERBB2 @ 67 (3.830356053), SRC @ 72 (3.815262485), PLCG1 @ 73 (3.813392608), FANCC @ 83 (3.776114382)	HSPA9	1190	2.66953	TP53 @ 7 (4.263878027), EGFR @ 8 (4.259252678), APP @ 20 (4.06357256), NRF1 @ 22 (4.046253517), NFKB1 @ 24 (4.021122149), H2AX @ 33 (3.978872976), CDK9 @ 40 (3.936164117), JUN @ 42 (3.928420791), CDH1 @ 48 (3.861344958), RELA @ 55 (3.832644555), TRAF6 @ 60 (3.802540496), SIRT1 @ 61 (3.802094612), GRB2 @ 65 (3.770730971), PRKACA @ 69 (3.762362936), HSP90AB1 @ 77 (3.725182879), AKT1 @ 82 (3.7167180…
GRB10	1300	2.67121	INSR @ 10 (4.567054143), EGFR @ 18 (4.255273461), GRB2 @ 21 (4.184991908), IGF1R @ 23 (4.061111546), YWHAE @ 31 (4.000171791), PIK3CA @ 49 (3.87790566), ERBB2 @ 67 (3.830356053), SRC @ 72 (3.815262485), APP @ 91 (3.745785722), INS @ 94 (3.741981928)	CXCL8	1192	2.6693	EP300 @ 3 (4.566455535), TP53 @ 7 (4.263878027), NFKB1 @ 24 (4.021122149), SRC @ 32 (3.98269232), JUN @ 42 (3.928420791), RELA @ 55 (3.832644555), STAT3 @ 75 (3.739433125)
MAPK9	1304	2.66941	EGFR @ 18 (4.255273461), GRB2 @ 21 (4.184991908), TP53 @ 29 (4.011818792), CTBP1 @ 34 (3.965358784), NRAS @ 41 (3.934319021), CTNNB1 @ 42 (3.926547961), KRAS @ 43 (3.922588159), HRAS @ 55 (3.85675947), SRC @ 72 (3.815262485), FOXO1 @ 90 (3.74627242), APP @ 91 (3.745785722), STAT3 @ 92 (3.744179493)	GSDMD	1201	2.66509	IRF1 @ 39 (3.937384347)
NANOG	1311	2.66626	SIN3A @ 33 (3.966211795), CTNNB1 @ 42 (3.926547961), LEF1 @ 87 (3.764766052), FOXO1 @ 90 (3.74627242), STAT3 @ 92 (3.744179493)	VAV1	1206	2.66213	ERBB3 @ 2 (4.731127927), EGFR @ 8 (4.259252678), SRC @ 32 (3.98269232), EZH2 @ 49 (3.859099803), ERBB2 @ 53 (3.843354357), AR @ 64 (3.786837043), GRB2 @ 65 (3.770730971), XRCC6 @ 80 (3.718531754)
MAPT	1315	2.66284	EGFR @ 18 (4.255273461), YWHAE @ 31 (4.000171791), CDK1 @ 36 (3.960479767), EP300 @ 44 (3.908165976), HSP90AB1 @ 47 (3.89559168), SRC @ 72 (3.815262485), YWHAB @ 75 (3.807771122), APP @ 91 (3.745785722)	AKT3	1218	2.65702	TP53 @ 7 (4.263878027), BRCA1 @ 14 (4.109727894), JUN @ 42 (3.928420791), MDM2 @ 47 (3.863162591), PRKACA @ 69 (3.762362936), HSP90AB1 @ 77 (3.725182879), AKT1 @ 82 (3.716718023), HSP90AA1 @ 87 (3.706481498)
PIK3CG	1317	2.66197	GRB2 @ 21 (4.184991908), IGF1R @ 23 (4.061111546), NRAS @ 41 (3.934319021), KRAS @ 43 (3.922588159), GRK2 @ 45 (3.906377942), PIK3CA @ 49 (3.87790566), HRAS @ 55 (3.85675947), PIK3R2 @ 57 (3.849769814), SRC @ 72 (3.815262485), PLCG1 @ 73 (3.813392608), PIK3CD @ 76 (3.806903236), PIK3CB @ 79 (3.788819698), GNB1 @ 80 (3.788808915), GNG2 @ 86 (3.766846214), PIK3R3 @ 88 (3.750814494), SHC1 @ 89 (3.74…	SOCS3	1222	2.65608	EGFR @ 8 (4.259252678), APP @ 20 (4.06357256), NFKB1 @ 24 (4.021122149), RELA @ 55 (3.832644555), TRAF6 @ 60 (3.802540496), AR @ 64 (3.786837043), RUNX1 @ 71 (3.759465655), STAT1 @ 72 (3.759329862), STAT3 @ 75 (3.739433125), AKT1 @ 82 (3.716718023)
TUBB2A	1318	2.66138	CDK2 @ 3 (4.692024128), EGFR @ 18 (4.255273461), PAPSS2 @ 22 (4.109209196), TP53 @ 29 (4.011818792), YWHAE @ 31 (4.000171791), TERF1 @ 65 (3.835912394)	IL7R	1226	2.65194	MAPRE1 @ 6 (4.289142824), GRB2 @ 65 (3.770730971), STAT3 @ 75 (3.739433125), YWHAB @ 93 (3.686814642)
MAP2K1	1336	2.65067	YAP1 @ 8 (4.590383402), EGFR @ 18 (4.255273461), CDH1 @ 26 (4.048973937), YWHAE @ 31 (4.000171791), CDK1 @ 36 (3.960479767), NRAS @ 41 (3.934319021), KRAS @ 43 (3.922588159), EP300 @ 44 (3.908165976), HSP90AB1 @ 47 (3.89559168), PIK3CA @ 49 (3.87790566), HRAS @ 55 (3.85675947), ERBB2 @ 67 (3.830356053), SRC @ 72 (3.815262485), YWHAB @ 75 (3.807771122)	EIF2S2	1235	2.64965	RPS26 @ 4 (4.467848456), TP53 @ 7 (4.263878027), APP @ 20 (4.06357256), NRF1 @ 22 (4.046253517), H2AX @ 33 (3.978872976), RPS27A @ 35 (3.95946954), ZBTB16 @ 38 (3.943619187), JUN @ 42 (3.928420791)
CASP8	1342	2.64983	CDH1 @ 26 (4.048973937), TP53 @ 29 (4.011818792), CDK1 @ 36 (3.960479767), CTNNB1 @ 42 (3.926547961), HSP90AB1 @ 47 (3.89559168), SRC @ 72 (3.815262485), APP @ 91 (3.745785722)	UBE2D3	1247	2.6448	TP53 @ 7 (4.263878027), ELAVL1 @ 12 (4.178507033), BRCA1 @ 14 (4.109727894), NRF1 @ 22 (4.046253517), NFKB1 @ 24 (4.021122149), RPS27A @ 35 (3.95946954), UBA52 @ 41 (3.930125003), MDM2 @ 47 (3.863162591), RELA @ 55 (3.832644555), TRAF6 @ 60 (3.802540496)
KPNA4	1344	2.64887	KPNA2 @ 20 (4.185288434), TP53 @ 29 (4.011818792), CBX5 @ 60 (3.848006823), APP @ 91 (3.745785722)	SOS1	1250	2.64239	ERBB3 @ 2 (4.731127927), EGFR @ 8 (4.259252678), NRF1 @ 22 (4.046253517), SRC @ 32 (3.98269232), ERBB2 @ 53 (3.843354357), GRB2 @ 65 (3.770730971), AKT1 @ 82 (3.716718023), ESR1 @ 95 (3.677494751)
NUP50	1346	2.64816	KPNA2 @ 20 (4.185288434), CDK1 @ 36 (3.960479767), NPM1 @ 70 (3.818434018), APP @ 91 (3.745785722)	HLA-A	1262	2.63661	SRC @ 32 (3.98269232), ERBB2 @ 53 (3.843354357), ATM @ 59 (3.803938404), PRKACA @ 69 (3.762362936), STAT1 @ 72 (3.759329862), STAT3 @ 75 (3.739433125)
PSMA1	1348	2.6467	IKZF3 @ 16 (4.29678545), IKZF1 @ 28 (4.018602888), UBA52 @ 58 (3.849143067), RPS27A @ 64 (3.841632945), APP @ 91 (3.745785722)	RAF1	1264	2.6361	EGFR @ 8 (4.259252678), NRF1 @ 22 (4.046253517), NFKB1 @ 24 (4.021122149), SRC @ 32 (3.98269232), YWHAE @ 37 (3.946570154), RELA @ 55 (3.832644555), MYC @ 56 (3.825986802), AR @ 64 (3.786837043), GRB2 @ 65 (3.770730971), PRKACA @ 69 (3.762362936), STAT3 @ 75 (3.739433125), HSP90AB1 @ 77 (3.725182879), AKT1 @ 82 (3.716718023), HSP90AA1 @ 87 (3.706481498), YWHAB @ 93 (3.686814642)
GSDMD	1356	2.6433	CYCS @ 81 (3.787614979)	EIF4A1	1283	2.62812	RPS26 @ 4 (4.467848456), NFKB1 @ 24 (4.021122149), H2AX @ 33 (3.978872976), RPS27A @ 35 (3.95946954), JUN @ 42 (3.928420791), MYC @ 56 (3.825986802), GRB2 @ 65 (3.770730971), HSP90AB1 @ 77 (3.725182879), NPM1 @ 79 (3.723229211), AKT1 @ 82 (3.716718023), CDK2 @ 89 (3.699623682), ESR1 @ 95 (3.677494751)
YBX1	1359	2.64116	EGFR @ 18 (4.255273461), TP53 @ 29 (4.011818792), CTNNB1 @ 42 (3.926547961), EP300 @ 44 (3.908165976), NPM1 @ 70 (3.818434018)	IFNA4	1287	2.62506	EGFR @ 8 (4.259252678), NFKB1 @ 24 (4.021122149), IRF1 @ 39 (3.937384347), STAT1 @ 72 (3.759329862)
NUP62	1392	2.62224	KPNA2 @ 20 (4.185288434), CTNNB1 @ 42 (3.926547961), MUC1 @ 46 (3.897446897), NPM1 @ 70 (3.818434018)	IFNA2	1288	2.62497	EGFR @ 8 (4.259252678), NFKB1 @ 24 (4.021122149), IRF1 @ 39 (3.937384347), RELA @ 55 (3.832644555), STAT1 @ 72 (3.759329862)
ICAM1	1394	2.62206	EGFR @ 18 (4.255273461), NRAS @ 41 (3.934319021), KRAS @ 43 (3.922588159), MUC1 @ 46 (3.897446897), HRAS @ 55 (3.85675947), NPM1 @ 70 (3.818434018), PLCG1 @ 73 (3.813392608), STAT3 @ 92 (3.744179493), PLCG2 @ 98 (3.731445794)	TIMP1	1297	2.62269	ZBTB16 @ 38 (3.943619187), STAT3 @ 75 (3.739433125)
SH2B1	1395	2.6214	INSR @ 10 (4.567054143), EGFR @ 18 (4.255273461), GRB2 @ 21 (4.184991908), IGF1R @ 23 (4.061111546), STAT3 @ 92 (3.744179493)	IFNA17	1300	2.62217	EGFR @ 8 (4.259252678), NFKB1 @ 24 (4.021122149), IRF1 @ 39 (3.937384347), RELA @ 55 (3.832644555), STAT1 @ 72 (3.759329862)
NCAM1	1399	2.61943	EGFR @ 18 (4.255273461), FOXP3 @ 40 (3.94032475), KRAS @ 43 (3.922588159), PLCG1 @ 73 (3.813392608)	SDC1	1304	2.61918	APP @ 20 (4.06357256), ERBB2 @ 53 (3.843354357), MYC @ 56 (3.825986802)
EIF4E	1429	2.60028	CTNNB1 @ 42 (3.926547961), APP @ 91 (3.745785722)	PSMA1	1321	2.61341	MAPRE1 @ 6 (4.289142824), APP @ 20 (4.06357256), NFKB1 @ 24 (4.021122149), RPS27A @ 35 (3.95946954), UBA52 @ 41 (3.930125003), MYC @ 56 (3.825986802), TRAF6 @ 60 (3.802540496)
KPNA3	1430	2.60017	KPNA2 @ 20 (4.185288434), CBX5 @ 60 (3.848006823)	MAP3K7	1324	2.61265	NFKB1 @ 24 (4.021122149), RPS27A @ 35 (3.95946954), YWHAE @ 37 (3.946570154), JUN @ 42 (3.928420791), EZH2 @ 49 (3.859099803), RELA @ 55 (3.832644555), MYC @ 56 (3.825986802), ATM @ 59 (3.803938404), TRAF6 @ 60 (3.802540496), PRKACA @ 69 (3.762362936), STAT3 @ 75 (3.739433125), HSP90AB1 @ 77 (3.725182879), HSP90AA1 @ 87 (3.706481498), CLTC @ 98 (3.665966184)
BECN1	1432	2.59835	EGFR @ 18 (4.255273461), TP53 @ 29 (4.011818792), ERBB2 @ 67 (3.830356053), PIK3CB @ 79 (3.788819698), STAT3 @ 92 (3.744179493)	VIM	1325	2.61211	TP53 @ 7 (4.263878027), CDK1 @ 18 (4.078436677), APP @ 20 (4.06357256), NFKB1 @ 24 (4.021122149), YWHAE @ 37 (3.946570154), CDK9 @ 40 (3.936164117), JUN @ 42 (3.928420791), HDAC1 @ 45 (3.875037284), RELA @ 55 (3.832644555), GRB2 @ 65 (3.770730971), PRKACA @ 69 (3.762362936), STAT3 @ 75 (3.739433125), AKT1 @ 82 (3.716718023), RAD51 @ 85 (3.708628165), HSP90AA1 @ 87 (3.706481498), CDK2 @ 89 (3.6996…
IKBKB	1440	2.59286	TP53 @ 29 (4.011818792), CTNNB1 @ 42 (3.926547961), MUC1 @ 46 (3.897446897), HSP90AB1 @ 47 (3.89559168), CLTC @ 68 (3.829350917), SRC @ 72 (3.815262485), YWHAB @ 75 (3.807771122), FOXO1 @ 90 (3.74627242), STAT3 @ 92 (3.744179493), INS @ 94 (3.741981928)	IFNA14	1327	2.6103	EGFR @ 8 (4.259252678), NFKB1 @ 24 (4.021122149), IRF1 @ 39 (3.937384347), STAT1 @ 72 (3.759329862)
SOCS2	1448	2.58926	INSR @ 10 (4.567054143), IGF1R @ 23 (4.061111546), STAT3 @ 92 (3.744179493)	IFNA10	1330	2.60995	EGFR @ 8 (4.259252678), NFKB1 @ 24 (4.021122149), IRF1 @ 39 (3.937384347), STAT1 @ 72 (3.759329862)
MAP3K3	1450	2.58692	EGFR @ 18 (4.255273461), YWHAE @ 31 (4.000171791), HSP90AB1 @ 47 (3.89559168), UBA52 @ 58 (3.849143067), RPS27A @ 64 (3.841632945), CLTC @ 68 (3.829350917), YWHAB @ 75 (3.807771122), GNB1 @ 80 (3.788808915)	IFNA21	1331	2.60979	EGFR @ 8 (4.259252678), NFKB1 @ 24 (4.021122149), IRF1 @ 39 (3.937384347), STAT1 @ 72 (3.759329862)
CSF3R	1451	2.58691	RUNX1 @ 19 (4.230547681), GRB2 @ 21 (4.184991908), KRAS @ 43 (3.922588159), RPS27A @ 64 (3.841632945), SHC1 @ 89 (3.749321692), STAT3 @ 92 (3.744179493)	IFNA5	1334	2.60825	EGFR @ 8 (4.259252678), APP @ 20 (4.06357256), NFKB1 @ 24 (4.021122149), IRF1 @ 39 (3.937384347), STAT1 @ 72 (3.759329862)
TUBB4B	1460	2.58444	CDK2 @ 3 (4.692024128), EGFR @ 18 (4.255273461), GRB2 @ 21 (4.184991908), YWHAE @ 31 (4.000171791), GRK2 @ 45 (3.906377942), TERF1 @ 65 (3.835912394), YWHAB @ 75 (3.807771122), SHC1 @ 89 (3.749321692)	ABL2	1343	2.6021	ERBB3 @ 2 (4.731127927), EGFR @ 8 (4.259252678), ERBB4 @ 29 (3.99164713), SRC @ 32 (3.98269232), ERBB2 @ 53 (3.843354357), AR @ 64 (3.786837043), GRB2 @ 65 (3.770730971), RIN1 @ 100 (3.661582788)
ITGAM	1462	2.58338	PIK3CA @ 49 (3.87790566), PIK3R2 @ 57 (3.849769814), SRC @ 72 (3.815262485), PIK3CD @ 76 (3.806903236), PIK3CB @ 79 (3.788819698), PIK3R3 @ 88 (3.750814494), STAT3 @ 92 (3.744179493)	IFNA7	1347	2.59568	EGFR @ 8 (4.259252678), NFKB1 @ 24 (4.021122149), IRF1 @ 39 (3.937384347), STAT1 @ 72 (3.759329862)
UBE2D1	1465	2.58196	YAP1 @ 8 (4.590383402), TP53 @ 29 (4.011818792), CTNNB1 @ 42 (3.926547961), EP300 @ 44 (3.908165976), UBA52 @ 58 (3.849143067), RPS27A @ 64 (3.841632945)	PRTN3	1368	2.58812	RELA @ 55 (3.832644555)
PTPN14	1475	2.57191	YAP1 @ 8 (4.590383402), CDH1 @ 26 (4.048973937), YWHAE @ 31 (4.000171791), CTNNB1 @ 42 (3.926547961), NPM1 @ 70 (3.818434018), YWHAB @ 75 (3.807771122)	TYK2	1371	2.58707	EGFR @ 8 (4.259252678), YWHAE @ 37 (3.946570154), GRB2 @ 65 (3.770730971), STAT1 @ 72 (3.759329862), STAT3 @ 75 (3.739433125), HSP90AB1 @ 77 (3.725182879), NPM1 @ 79 (3.723229211), HSP90AA1 @ 87 (3.706481498)
CHUK	1478	2.57025	TP53 @ 29 (4.011818792), CTNNB1 @ 42 (3.926547961), EP300 @ 44 (3.908165976), HSP90AB1 @ 47 (3.89559168), CLTC @ 68 (3.829350917), SRC @ 72 (3.815262485), FOXO1 @ 90 (3.74627242)	ABCE1	1372	2.58629	RPS26 @ 4 (4.467848456), RPS27A @ 35 (3.95946954), UBA52 @ 41 (3.930125003), JUN @ 42 (3.928420791)
FSCN1	1480	2.56904	CDK2 @ 3 (4.692024128), RAB35 @ 17 (4.272343404), GRB2 @ 21 (4.184991908), GNAS @ 27 (4.026244404), YWHAE @ 31 (4.000171791), CTNNB1 @ 42 (3.926547961), STAT3 @ 92 (3.744179493)	TUBA4A	1378	2.58468	ERBB3 @ 2 (4.731127927), EGFR @ 8 (4.259252678), BRCA1 @ 14 (4.109727894), NFKB1 @ 24 (4.021122149), RPS27A @ 35 (3.95946954), JUN @ 42 (3.928420791), MYC @ 56 (3.825986802), GRB2 @ 65 (3.770730971), SOX2 @ 70 (3.761055665)
IRF4	1485	2.56808	IKZF3 @ 16 (4.29678545), IKZF1 @ 28 (4.018602888), FOXP3 @ 40 (3.94032475), EP300 @ 44 (3.908165976), STAT3 @ 92 (3.744179493)	IFIT1	1397	2.57514	IRF1 @ 39 (3.937384347), STAT1 @ 72 (3.759329862), HSP90AB1 @ 77 (3.725182879), HSP90AA1 @ 87 (3.706481498)
MSN	1502	2.55895	CDK2 @ 3 (4.692024128), EGFR @ 18 (4.255273461), GRB2 @ 21 (4.184991908), CTNNB1 @ 42 (3.926547961), GRK2 @ 45 (3.906377942), PAPSS1 @ 54 (3.85901715), TERF1 @ 65 (3.835912394), SRC @ 72 (3.815262485)	ZEB1	1400	2.57438	EP300 @ 3 (4.566455535), TP53 @ 7 (4.263878027), YAP1 @ 15 (4.103703234), SMARCA4 @ 27 (4.004652833), HDAC2 @ 31 (3.989763953), HDAC1 @ 45 (3.875037284), MYC @ 56 (3.825986802), ATM @ 59 (3.803938404), SIRT1 @ 61 (3.802094612), SOX2 @ 70 (3.761055665), STAT3 @ 75 (3.739433125), AKT1 @ 82 (3.716718023), ESR1 @ 95 (3.677494751)
SNCA	1504	2.5586	EGFR @ 18 (4.255273461), YWHAE @ 31 (4.000171791), GRK2 @ 45 (3.906377942), CLTC @ 68 (3.829350917), SRC @ 72 (3.815262485), YWHAB @ 75 (3.807771122), CYCS @ 81 (3.787614979), APP @ 91 (3.745785722), INS @ 94 (3.741981928)	IFNA16	1411	2.57155	EGFR @ 8 (4.259252678), APP @ 20 (4.06357256), NFKB1 @ 24 (4.021122149), IRF1 @ 39 (3.937384347), STAT1 @ 72 (3.759329862)
EIF4A3	1507	2.55717	CDK2 @ 3 (4.692024128), GRB2 @ 21 (4.184991908)	PSMD4	1419	2.56877	TP53 @ 7 (4.263878027), EGFR @ 8 (4.259252678), APP @ 20 (4.06357256), RPS27A @ 35 (3.95946954), UBA52 @ 41 (3.930125003), JUN @ 42 (3.928420791), MDM2 @ 47 (3.863162591), MYC @ 56 (3.825986802), TRAF6 @ 60 (3.802540496), NPM1 @ 79 (3.723229211), KEAP1 @ 83 (3.711971154)
GRAP2	1525	2.5473	EGFR @ 18 (4.255273461), GRB2 @ 21 (4.184991908), YWHAE @ 31 (4.000171791), ERBB2 @ 67 (3.830356053), SRC @ 72 (3.815262485), PLCG1 @ 73 (3.813392608), SHC1 @ 89 (3.749321692), PLCG2 @ 98 (3.731445794)	CSK	1431	2.56275	ERBB3 @ 2 (4.731127927), EGFR @ 8 (4.259252678), ELAVL1 @ 12 (4.178507033), NRF1 @ 22 (4.046253517), CTNNB1 @ 23 (4.032609254), SRC @ 32 (3.98269232), CDK9 @ 40 (3.936164117), JUN @ 42 (3.928420791), ERBB2 @ 53 (3.843354357), GRB2 @ 65 (3.770730971), PRKACA @ 69 (3.762362936), STAT3 @ 75 (3.739433125), HSP90AB1 @ 77 (3.725182879), AKT1 @ 82 (3.716718023), HSP90AA1 @ 87 (3.706481498), ESR1 @ 95 (3…
AKT3	1546	2.53777	TP53 @ 29 (4.011818792), HSP90AB1 @ 47 (3.89559168), PIK3CA @ 49 (3.87790566), PIK3R2 @ 57 (3.849769814), PIK3CD @ 76 (3.806903236), PIK3CB @ 79 (3.788819698), PIK3R3 @ 88 (3.750814494), FOXO1 @ 90 (3.74627242)	IRF8	1433	2.56054	NFKB1 @ 24 (4.021122149), IRF1 @ 39 (3.937384347), RELA @ 55 (3.832644555), TRAF6 @ 60 (3.802540496), STAT1 @ 72 (3.759329862), STAT3 @ 75 (3.739433125)
INPPL1	1548	2.53588	INSR @ 10 (4.567054143), EGFR @ 18 (4.255273461), GRB2 @ 21 (4.184991908), HSP90AB1 @ 47 (3.89559168), PIK3CA @ 49 (3.87790566), PIK3R2 @ 57 (3.849769814), SRC @ 72 (3.815262485), PIK3CD @ 76 (3.806903236), PIK3CB @ 79 (3.788819698), PIK3R3 @ 88 (3.750814494), SHC1 @ 89 (3.749321692), STAT3 @ 92 (3.744179493), PLCG2 @ 98 (3.731445794)	ANXA2	1435	2.55834	ERBB3 @ 2 (4.731127927), EP300 @ 3 (4.566455535), TP53 @ 7 (4.263878027), EGFR @ 8 (4.259252678), APP @ 20 (4.06357256), NFKB1 @ 24 (4.021122149), SRC @ 32 (3.98269232), H2AX @ 33 (3.978872976), CDK9 @ 40 (3.936164117), JUN @ 42 (3.928420791), ERBB2 @ 53 (3.843354357), MYC @ 56 (3.825986802), TRAF6 @ 60 (3.802540496), GRB2 @ 65 (3.770730971), NPM1 @ 79 (3.723229211), CDK2 @ 89 (3.699623682), ESR1…
CXCL8	1553	2.53257	TP53 @ 29 (4.011818792), EP300 @ 44 (3.908165976), POMC @ 56 (3.852283734), SRC @ 72 (3.815262485), GNB1 @ 80 (3.788808915), GNG2 @ 86 (3.766846214), STAT3 @ 92 (3.744179493)	MAP2K1	1438	2.55811	EP300 @ 3 (4.566455535), EGFR @ 8 (4.259252678), ELAVL1 @ 12 (4.178507033), YAP1 @ 15 (4.103703234), CDK1 @ 18 (4.078436677), NFKB1 @ 24 (4.021122149), SRC @ 32 (3.98269232), YWHAE @ 37 (3.946570154), CDH1 @ 48 (3.861344958), ERBB2 @ 53 (3.843354357), MYC @ 56 (3.825986802), TRAF6 @ 60 (3.802540496), PRKACA @ 69 (3.762362936), HSP90AB1 @ 77 (3.725182879), HSP90AA1 @ 87 (3.706481498), YWHAB @ 93 (…
HMGB1	1568	2.52866	CDK2 @ 3 (4.692024128), TBP @ 13 (4.487899762), TP53 @ 29 (4.011818792), CDK1 @ 36 (3.960479767), TERF2 @ 48 (3.885006348)	HCK	1442	2.55344	ERBB3 @ 2 (4.731127927), EGFR @ 8 (4.259252678), APP @ 20 (4.06357256), SRC @ 32 (3.98269232), AR @ 64 (3.786837043), GRB2 @ 65 (3.770730971), STAT1 @ 72 (3.759329862), STAT3 @ 75 (3.739433125), HSP90AB1 @ 77 (3.725182879), HSP90AA1 @ 87 (3.706481498)
LIFR	1572	2.52769	RUNX1 @ 19 (4.230547681), GRB2 @ 21 (4.184991908), PIK3CA @ 49 (3.87790566), PIK3R2 @ 57 (3.849769814), PLCG1 @ 73 (3.813392608), PIK3CD @ 76 (3.806903236), PIK3CB @ 79 (3.788819698), PIK3R3 @ 88 (3.750814494), STAT3 @ 92 (3.744179493)	CASP8	1453	2.55012	TP53 @ 7 (4.263878027), CDK1 @ 18 (4.078436677), APP @ 20 (4.06357256), CTNNB1 @ 23 (4.032609254), SRC @ 32 (3.98269232), MDM2 @ 47 (3.863162591), CDH1 @ 48 (3.861344958), RELA @ 55 (3.832644555), MYC @ 56 (3.825986802), ATM @ 59 (3.803938404), TRAF6 @ 60 (3.802540496), AR @ 64 (3.786837043), SOX2 @ 70 (3.761055665), HSP90AB1 @ 77 (3.725182879), AKT1 @ 82 (3.716718023)
CSF3	1573	2.52679	EGFR @ 18 (4.255273461), RPS27A @ 64 (3.841632945), STAT3 @ 92 (3.744179493)	PIK3CG	1485	2.5393	SRC @ 32 (3.98269232), GRB2 @ 65 (3.770730971), STAT3 @ 75 (3.739433125), AKT1 @ 82 (3.716718023)
ANXA1	1587	2.51952	CDK2 @ 3 (4.692024128), EGFR @ 18 (4.255273461), CDH1 @ 26 (4.048973937), TP53 @ 29 (4.011818792), SRC @ 72 (3.815262485)	SOCS6	1489	2.53706	EGFR @ 8 (4.259252678), YAP1 @ 15 (4.103703234), RELA @ 55 (3.832644555), AR @ 64 (3.786837043), STAT1 @ 72 (3.759329862), STAT3 @ 75 (3.739433125), BMPR1B @ 76 (3.725317326), HSP90AB1 @ 77 (3.725182879), HSP90AA1 @ 87 (3.706481498)
CUL5	1591	2.51911	HSP90AB1 @ 47 (3.89559168), RPS27A @ 64 (3.841632945), ERBB2 @ 67 (3.830356053), CLTC @ 68 (3.829350917), NPM1 @ 70 (3.818434018)	KPNA1	1503	2.53022	EGFR @ 8 (4.259252678), ELAVL1 @ 12 (4.178507033), BRCA1 @ 14 (4.109727894), KPNA2 @ 16 (4.098579501), NRF1 @ 22 (4.046253517), NFKB1 @ 24 (4.021122149), SMARCA4 @ 27 (4.004652833), HDAC2 @ 31 (3.989763953), HDAC1 @ 45 (3.875037284), RELA @ 55 (3.832644555), SOX2 @ 70 (3.761055665), STAT1 @ 72 (3.759329862), STAT3 @ 75 (3.739433125), TP53BP1 @ 78 (3.725074195), NPM1 @ 79 (3.723229211), H3-4 @ 88 …
IL10	1594	2.5181	EGFR @ 18 (4.255273461), POMC @ 56 (3.852283734), STAT3 @ 92 (3.744179493)	IFNA8	1505	2.52851	EGFR @ 8 (4.259252678), APP @ 20 (4.06357256), NFKB1 @ 24 (4.021122149), IRF1 @ 39 (3.937384347), STAT1 @ 72 (3.759329862)
NUP107	1597	2.51695	CDK2 @ 3 (4.692024128), FOXP3 @ 40 (3.94032475), KRAS @ 43 (3.922588159)	TRAF3	1506	2.52847	NFKB1 @ 24 (4.021122149), SRC @ 32 (3.98269232), RPS27A @ 35 (3.95946954), IRF1 @ 39 (3.937384347), UBA52 @ 41 (3.930125003), TRAF6 @ 60 (3.802540496)
IL2RA	1616	2.50824	RUNX1 @ 19 (4.230547681), FOXP3 @ 40 (3.94032475), SHC1 @ 89 (3.749321692), STAT3 @ 92 (3.744179493)	NUP153	1511	2.52651	KPNA2 @ 16 (4.098579501), CTNNB1 @ 23 (4.032609254), MYC @ 56 (3.825986802), CDK2 @ 89 (3.699623682), ESR1 @ 95 (3.677494751)
CASP1	1628	2.50276	EGFR @ 18 (4.255273461), TP53 @ 29 (4.011818792)	IRF2	1516	2.52431	EP300 @ 3 (4.566455535), APP @ 20 (4.06357256), NFKB1 @ 24 (4.021122149), IRF1 @ 39 (3.937384347), MDM2 @ 47 (3.863162591), RELA @ 55 (3.832644555), PRKACA @ 69 (3.762362936), STAT1 @ 72 (3.759329862), HSP90AB1 @ 77 (3.725182879), HSP90AA1 @ 87 (3.706481498)
TYK2	1651	2.49456	EGFR @ 18 (4.255273461), GRB2 @ 21 (4.184991908), YWHAE @ 31 (4.000171791), HSP90AB1 @ 47 (3.89559168), PIK3CA @ 49 (3.87790566), NPM1 @ 70 (3.818434018), PIK3CD @ 76 (3.806903236), PIK3CB @ 79 (3.788819698), STAT3 @ 92 (3.744179493)	IFIT3	1518	2.52336	APP @ 20 (4.06357256), IRF1 @ 39 (3.937384347), STAT1 @ 72 (3.759329862)
MYD88	1652	2.49444	YWHAE @ 31 (4.000171791), SRC @ 72 (3.815262485)	MAPK11	1521	2.52076	TP53 @ 7 (4.263878027), EGFR @ 8 (4.259252678), APP @ 20 (4.06357256), SRC @ 32 (3.98269232), JUN @ 42 (3.928420791), AKT1 @ 82 (3.716718023), MED1 @ 84 (3.711224374), ESR1 @ 95 (3.677494751)
TUBA1A	1679	2.48589	EGFR @ 18 (4.255273461), YWHAE @ 31 (4.000171791), CTNNB1 @ 42 (3.926547961), HSP90AB1 @ 47 (3.89559168), CBX5 @ 60 (3.848006823), YWHAB @ 75 (3.807771122), SHC1 @ 89 (3.749321692)	RAP1B	1525	2.51947	TP53 @ 7 (4.263878027), XRCC1 @ 9 (4.232647006), APP @ 20 (4.06357256), SRC @ 32 (3.98269232), PRKACA @ 69 (3.762362936)
ARF1	1696	2.47845	CDK2 @ 3 (4.692024128), INSR @ 10 (4.567054143), CLTC @ 68 (3.829350917), NPM1 @ 70 (3.818434018)	IFNA6	1529	2.51869	EGFR @ 8 (4.259252678), NFKB1 @ 24 (4.021122149), IRF1 @ 39 (3.937384347), STAT1 @ 72 (3.759329862)
MAPK7	1712	2.47179	YWHAE @ 31 (4.000171791), HSP90AB1 @ 47 (3.89559168), YWHAB @ 75 (3.807771122), APP @ 91 (3.745785722)	IL2RA	1537	2.5146	NFKB1 @ 24 (4.021122149), FOXP3 @ 34 (3.966832631), RUNX1 @ 71 (3.759465655), STAT3 @ 75 (3.739433125)
VIM	1734	2.4616	CDK2 @ 3 (4.692024128), GRB2 @ 21 (4.184991908), TP53 @ 29 (4.011818792), YWHAE @ 31 (4.000171791), CDK1 @ 36 (3.960479767), YWHAB @ 75 (3.807771122), APP @ 91 (3.745785722), STAT3 @ 92 (3.744179493)	ICAM1	1548	2.51012	EGFR @ 8 (4.259252678), RELA @ 55 (3.832644555), STAT1 @ 72 (3.759329862), STAT3 @ 75 (3.739433125), NPM1 @ 79 (3.723229211), XRCC6 @ 80 (3.718531754), H3-4 @ 88 (3.699941274)
PSMD2	1747	2.4563	CDK2 @ 3 (4.692024128), EGFR @ 18 (4.255273461), TP53 @ 29 (4.011818792), UBA52 @ 58 (3.849143067), RPS27A @ 64 (3.841632945), ERBB2 @ 67 (3.830356053), GNB1 @ 80 (3.788808915)	TNFRSF1A	1554	2.50623	EGFR @ 8 (4.259252678), ELAVL1 @ 12 (4.178507033), SRC @ 32 (3.98269232), RPS27A @ 35 (3.95946954), UBA52 @ 41 (3.930125003), TRAF6 @ 60 (3.802540496), GRB2 @ 65 (3.770730971), STAT1 @ 72 (3.759329862), STAT3 @ 75 (3.739433125), AKT1 @ 82 (3.716718023), HSP90AA1 @ 87 (3.706481498), H3-4 @ 88 (3.699941274), CLTC @ 98 (3.665966184)
IL6R	1755	2.45495	SRC @ 72 (3.815262485), PLCG1 @ 73 (3.813392608), SHC1 @ 89 (3.749321692), STAT3 @ 92 (3.744179493), PLCG2 @ 98 (3.731445794)	YES1	1562	2.50336	EGFR @ 8 (4.259252678), ELAVL1 @ 12 (4.178507033), YAP1 @ 15 (4.103703234), CTNNB1 @ 23 (4.032609254), ERBB4 @ 29 (3.99164713), SRC @ 32 (3.98269232), CDH1 @ 48 (3.861344958), RELA @ 55 (3.832644555), TRAF6 @ 60 (3.802540496), AR @ 64 (3.786837043), GRB2 @ 65 (3.770730971), HSP90AB1 @ 77 (3.725182879), NPM1 @ 79 (3.723229211), HSP90AA1 @ 87 (3.706481498)
TIMP1	1770	2.44968	STAT3 @ 92 (3.744179493)	OASL	1563	2.5033	IRF1 @ 39 (3.937384347), STAT1 @ 72 (3.759329862)
SOD1	1780	2.44451	HSP90AB1 @ 47 (3.89559168)	IL1B	1567	2.50134	EP300 @ 3 (4.566455535), NFKB1 @ 24 (4.021122149), JUN @ 42 (3.928420791), RELA @ 55 (3.832644555), MYC @ 56 (3.825986802), TRAF6 @ 60 (3.802540496), STAT3 @ 75 (3.739433125), HSP90AA1 @ 87 (3.706481498)
MMP1	1785	2.44171	STAT3 @ 92 (3.744179493)	XAF1	1608	2.48406	TP53 @ 7 (4.263878027), APP @ 20 (4.06357256), IRF1 @ 39 (3.937384347), STAT1 @ 72 (3.759329862)
MAPK11	1794	2.43623	EGFR @ 18 (4.255273461), TP53 @ 29 (4.011818792), SRC @ 72 (3.815262485), GNB1 @ 80 (3.788808915), FOXO1 @ 90 (3.74627242), APP @ 91 (3.745785722)	UBE2E1	1627	2.47788	BRCA1 @ 14 (4.109727894), RPS27A @ 35 (3.95946954), UBA52 @ 41 (3.930125003), RELA @ 55 (3.832644555), TRAF6 @ 60 (3.802540496), POU5F1 @ 90 (3.694597021)
STAT2	1803	2.43304	EGFR @ 18 (4.255273461), EP300 @ 44 (3.908165976), HSP90AB1 @ 47 (3.89559168), STAT3 @ 92 (3.744179493)	HAVCR2	1629	2.47612	APP @ 20 (4.06357256), FOXP3 @ 34 (3.966832631)
AGER	1817	2.42801	GRB2 @ 21 (4.184991908), NRAS @ 41 (3.934319021), KRAS @ 43 (3.922588159), HRAS @ 55 (3.85675947), APP @ 91 (3.745785722)	TBK1	1637	2.47338	APP @ 20 (4.06357256), NRF1 @ 22 (4.046253517), NFKB1 @ 24 (4.021122149), SRC @ 32 (3.98269232), RPS27A @ 35 (3.95946954), YWHAE @ 37 (3.946570154), MDM2 @ 47 (3.863162591), RELA @ 55 (3.832644555), TRAF6 @ 60 (3.802540496), STAT1 @ 72 (3.759329862), HSP90AB1 @ 77 (3.725182879), AKT1 @ 82 (3.716718023), HSP90AA1 @ 87 (3.706481498), ESR1 @ 95 (3.677494751)
MCL1	1820	2.42713	CDK2 @ 3 (4.692024128), TP53 @ 29 (4.011818792), CDK1 @ 36 (3.960479767), ERBB2 @ 67 (3.830356053), STAT3 @ 92 (3.744179493)	STAT4	1640	2.47291	EP300 @ 3 (4.566455535), JUN @ 42 (3.928420791), STAT1 @ 72 (3.759329862), STAT3 @ 75 (3.739433125), EOMES @ 81 (3.71727676)
IRF7	1831	2.4252	INSR @ 10 (4.567054143), EP300 @ 44 (3.908165976)	TAB2	1641	2.47261	APP @ 20 (4.06357256), NFKB1 @ 24 (4.021122149), ERBB4 @ 29 (3.99164713), HDAC2 @ 31 (3.989763953), RPS27A @ 35 (3.95946954), YWHAE @ 37 (3.946570154), ZBTB16 @ 38 (3.943619187), UBA52 @ 41 (3.930125003), HDAC1 @ 45 (3.875037284), RELA @ 55 (3.832644555), TRAF6 @ 60 (3.802540496), AR @ 64 (3.786837043), NPM1 @ 79 (3.723229211), HSP90AA1 @ 87 (3.706481498), ESR1 @ 95 (3.677494751), CLTC @ 98 (3.66…
TUBB3	1835	2.42288	EGFR @ 18 (4.255273461), GRB2 @ 21 (4.184991908), TP53 @ 29 (4.011818792), GRK2 @ 45 (3.906377942), PAPSS1 @ 54 (3.85901715), TERF1 @ 65 (3.835912394), NPM1 @ 70 (3.818434018), SHC1 @ 89 (3.749321692)	NFKBIB	1660	2.46435	KPNA2 @ 16 (4.098579501), APP @ 20 (4.06357256), NFKB1 @ 24 (4.021122149), RELA @ 55 (3.832644555), TRAF6 @ 60 (3.802540496), HSP90AB1 @ 77 (3.725182879), HSP90AA1 @ 87 (3.706481498), CLTC @ 98 (3.665966184)
PSMC5	1850	2.41813	CDK2 @ 3 (4.692024128), GTF2B @ 15 (4.432465953), TP53 @ 29 (4.011818792), GRK2 @ 45 (3.906377942), UBA52 @ 58 (3.849143067), RPS27A @ 64 (3.841632945), NPM1 @ 70 (3.818434018)	HMGB1	1667	2.46195	TP53 @ 7 (4.263878027), CDK1 @ 18 (4.078436677), NFKB1 @ 24 (4.021122149), RELA @ 55 (3.832644555), AR @ 64 (3.786837043), HSP90AA1 @ 87 (3.706481498), CDK2 @ 89 (3.699623682), POU5F1 @ 90 (3.694597021)
FLNB	1863	2.41047	CDK2 @ 3 (4.692024128), GRB2 @ 21 (4.184991908), NPM1 @ 70 (3.818434018), SRC @ 72 (3.815262485), PLCG1 @ 73 (3.813392608)	CSF3	1676	2.45862	EGFR @ 8 (4.259252678), RPS27A @ 35 (3.95946954), STAT1 @ 72 (3.759329862), STAT3 @ 75 (3.739433125)
UBE2M	1868	2.40888	CDK2 @ 3 (4.692024128), TP53 @ 29 (4.011818792), TST @ 52 (3.866256659), RPS27A @ 64 (3.841632945), APP @ 91 (3.745785722)	PSMA3	1680	2.45698	ELAVL1 @ 12 (4.178507033), NRF1 @ 22 (4.046253517), HDAC2 @ 31 (3.989763953), RPS27A @ 35 (3.95946954), UBA52 @ 41 (3.930125003), MDM2 @ 47 (3.863162591), MYC @ 56 (3.825986802), TRAF6 @ 60 (3.802540496), HSP90AB1 @ 77 (3.725182879), XRCC6 @ 80 (3.718531754), HSP90AA1 @ 87 (3.706481498)
COL1A2	1871	2.40831	DCN @ 53 (3.863807295), APP @ 91 (3.745785722)	SOD1	1682	2.45619	HSP90AB1 @ 77 (3.725182879)
CFL1	1874	2.40709	CDK2 @ 3 (4.692024128), EGFR @ 18 (4.255273461), GRB2 @ 21 (4.184991908), YWHAE @ 31 (4.000171791), UBA52 @ 58 (3.849143067), TERF1 @ 65 (3.835912394), NPM1 @ 70 (3.818434018), SRC @ 72 (3.815262485), ERBB4 @ 84 (3.769879596), APP @ 91 (3.745785722)	CSF3R	1684	2.45543	RPS27A @ 35 (3.95946954), GRB2 @ 65 (3.770730971), RUNX1 @ 71 (3.759465655), STAT3 @ 75 (3.739433125)
PSMD4	1884	2.40441	EGFR @ 18 (4.255273461), TP53 @ 29 (4.011818792), UBA52 @ 58 (3.849143067), RPS27A @ 64 (3.841632945), NPM1 @ 70 (3.818434018), APP @ 91 (3.745785722)	IFIT2	1685	2.45487	IRF1 @ 39 (3.937384347), STAT1 @ 72 (3.759329862)
PSMA5	1889	2.40368	CDK2 @ 3 (4.692024128), FOXP3 @ 40 (3.94032475), UBA52 @ 58 (3.849143067), RPS27A @ 64 (3.841632945), APP @ 91 (3.745785722)	RPS6KA1	1687	2.45408	RPS26 @ 4 (4.467848456), YWHAE @ 37 (3.946570154), GRB2 @ 65 (3.770730971), HSP90AB1 @ 77 (3.725182879), NPM1 @ 79 (3.723229211), HSP90AA1 @ 87 (3.706481498), YWHAB @ 93 (3.686814642), ESR1 @ 95 (3.677494751)
HLA-DRA	1892	2.40363	YWHAE @ 31 (4.000171791), HSP90AB1 @ 47 (3.89559168)	ITGB2	1691	2.44961	EGFR @ 8 (4.259252678), SRC @ 32 (3.98269232), YWHAB @ 93 (3.686814642)
MAP3K7	1913	2.39527	YWHAE @ 31 (4.000171791), HSP90AB1 @ 47 (3.89559168), HRAS @ 55 (3.85675947), RPS27A @ 64 (3.841632945), CLTC @ 68 (3.829350917), STAT3 @ 92 (3.744179493)	PSMD2	1705	2.44307	TP53 @ 7 (4.263878027), EGFR @ 8 (4.259252678), NFKB1 @ 24 (4.021122149), RPS27A @ 35 (3.95946954), ZBTB16 @ 38 (3.943619187), CDK9 @ 40 (3.936164117), UBA52 @ 41 (3.930125003), JUN @ 42 (3.928420791), MDM2 @ 47 (3.863162591), ERBB2 @ 53 (3.843354357), MYC @ 56 (3.825986802), TRAF6 @ 60 (3.802540496), CDK2 @ 89 (3.699623682), ESR1 @ 95 (3.677494751)
CSF2	1920	2.39111	EGFR @ 18 (4.255273461), RUNX1 @ 19 (4.230547681), STAT3 @ 92 (3.744179493)	PPP2R5A	1708	2.44096	CHEK2 @ 10 (4.196264648), MYC @ 56 (3.825986802), AKT1 @ 82 (3.716718023)
HLA-DRB1	1936	2.38798	YWHAE @ 31 (4.000171791), HSP90AB1 @ 47 (3.89559168), INS @ 94 (3.741981928)	EIF2S3	1709	2.44029	RPS26 @ 4 (4.467848456), ELAVL1 @ 12 (4.178507033), RPS27A @ 35 (3.95946954), JUN @ 42 (3.928420791), TRAF6 @ 60 (3.802540496), CDK2 @ 89 (3.699623682)
STAT6	1937	2.38743	TP53 @ 29 (4.011818792), EP300 @ 44 (3.908165976), SRC @ 72 (3.815262485), STAT3 @ 92 (3.744179493)	NFKB2	1712	2.43882	TP53 @ 7 (4.263878027), NFKB1 @ 24 (4.021122149), SMARCA4 @ 27 (4.004652833), HDAC1 @ 45 (3.875037284), RELA @ 55 (3.832644555), TRAF6 @ 60 (3.802540496), SIRT1 @ 61 (3.802094612), STAT3 @ 75 (3.739433125), HSP90AB1 @ 77 (3.725182879), HSP90AA1 @ 87 (3.706481498), ESR1 @ 95 (3.677494751), CLTC @ 98 (3.665966184)
NUP133	1940	2.38679	CDK2 @ 3 (4.692024128), FOXP3 @ 40 (3.94032475)	MSN	1715	2.43737	EGFR @ 8 (4.259252678), ELAVL1 @ 12 (4.178507033), BRCA1 @ 14 (4.109727894), CTNNB1 @ 23 (4.032609254), SRC @ 32 (3.98269232), H2AX @ 33 (3.978872976), TRAF6 @ 60 (3.802540496), GRB2 @ 65 (3.770730971), PRKACA @ 69 (3.762362936), CDK2 @ 89 (3.699623682)
TUBB2B	1955	2.38077	YWHAE @ 31 (4.000171791), SHC1 @ 89 (3.749321692)	IRF4	1721	2.43543	EP300 @ 3 (4.566455535), NFKB1 @ 24 (4.021122149), FOXP3 @ 34 (3.966832631), JUN @ 42 (3.928420791), TRAF6 @ 60 (3.802540496), STAT1 @ 72 (3.759329862), STAT3 @ 75 (3.739433125)
PPIA	1964	2.3762	CDK2 @ 3 (4.692024128), GRB2 @ 21 (4.184991908), HSP90AB1 @ 47 (3.89559168), NPM1 @ 70 (3.818434018), APP @ 91 (3.745785722)	PSMC1	1732	2.43173	TP53 @ 7 (4.263878027), APP @ 20 (4.06357256), RPS27A @ 35 (3.95946954), UBA52 @ 41 (3.930125003), JUN @ 42 (3.928420791), MDM2 @ 47 (3.863162591), MYC @ 56 (3.825986802), TRAF6 @ 60 (3.802540496), ESR1 @ 95 (3.677494751)
IFNGR1	1979	2.37253	NRAS @ 41 (3.934319021), KRAS @ 43 (3.922588159), PIK3CA @ 49 (3.87790566), HRAS @ 55 (3.85675947), PIK3R2 @ 57 (3.849769814), PIK3CD @ 76 (3.806903236), PIK3CB @ 79 (3.788819698), PIK3R3 @ 88 (3.750814494), STAT3 @ 92 (3.744179493)	KPNA4	1741	2.42951	TP53 @ 7 (4.263878027), ELAVL1 @ 12 (4.178507033), KPNA2 @ 16 (4.098579501), APP @ 20 (4.06357256), NFKB1 @ 24 (4.021122149), JUN @ 42 (3.928420791), HDAC1 @ 45 (3.875037284), RELA @ 55 (3.832644555), MYC @ 56 (3.825986802), SOX2 @ 70 (3.761055665), TP53BP1 @ 78 (3.725074195)
PTPN2	1983	2.37111	CDK2 @ 3 (4.692024128), INSR @ 10 (4.567054143), EGFR @ 18 (4.255273461), CDK1 @ 36 (3.960479767), SRC @ 72 (3.815262485), SHC1 @ 89 (3.749321692), STAT3 @ 92 (3.744179493)	TUBB2B	1747	2.42746	NFKB1 @ 24 (4.021122149), YWHAE @ 37 (3.946570154), JUN @ 42 (3.928420791), RELA @ 55 (3.832644555), TRAF6 @ 60 (3.802540496), HSP90AA1 @ 87 (3.706481498)
RAPGEF1	1998	2.36725	EGFR @ 18 (4.255273461), GRB2 @ 21 (4.184991908), CDH1 @ 26 (4.048973937), KRAS @ 43 (3.922588159), HRAS @ 55 (3.85675947), SRC @ 72 (3.815262485), SHC1 @ 89 (3.749321692)	IL6R	1751	2.42459	SRC @ 32 (3.98269232), STAT1 @ 72 (3.759329862), STAT3 @ 75 (3.739433125)
BIRC2	2006	2.36188	EGFR @ 18 (4.255273461), UBA52 @ 58 (3.849143067), RPS27A @ 64 (3.841632945)	USP18	1759	2.42256	RPS27A @ 35 (3.95946954), IRF1 @ 39 (3.937384347), STAT1 @ 72 (3.759329862), HSP90AB1 @ 77 (3.725182879)
ELOB	2044	2.34944	UBA52 @ 58 (3.849143067)	CCR1	1766	2.4188	STAT1 @ 72 (3.759329862), STAT3 @ 75 (3.739433125)
PSMC2	2048	2.34829	TBP @ 13 (4.487899762), GTF2B @ 15 (4.432465953), GRB2 @ 21 (4.184991908), GRK2 @ 45 (3.906377942), UBA52 @ 58 (3.849143067), RPS27A @ 64 (3.841632945)	SNAP25	1771	2.41562	EGFR @ 8 (4.259252678), APP @ 20 (4.06357256), PRKACA @ 69 (3.762362936)
POU2F1	2050	2.34813	CDK2 @ 3 (4.692024128), TBP @ 13 (4.487899762), EP300 @ 44 (3.908165976), APP @ 91 (3.745785722), STAT3 @ 92 (3.744179493)	CCR2	1781	2.41252	STAT3 @ 75 (3.739433125)
IL1B	2054	2.34714	EP300 @ 44 (3.908165976), STAT3 @ 92 (3.744179493)	NUP50	1815	2.40305	KPNA2 @ 16 (4.098579501), CDK1 @ 18 (4.078436677), APP @ 20 (4.06357256), NRF1 @ 22 (4.046253517), NPM1 @ 79 (3.723229211)
SEC13	2057	2.3461	EGFR @ 18 (4.255273461), CLTC @ 68 (3.829350917)	PPP2R5D	1816	2.4024	CHEK2 @ 10 (4.196264648), FEN1 @ 57 (3.81699797), PRKACA @ 69 (3.762362936), SOX2 @ 70 (3.761055665), AKT1 @ 82 (3.716718023), YWHAB @ 93 (3.686814642)
IFNG	2081	2.34043	EGFR @ 18 (4.255273461), RUNX1 @ 19 (4.230547681), FOXP3 @ 40 (3.94032475)	TUBA1B	1851	2.39081	NRF1 @ 22 (4.046253517), NFKB1 @ 24 (4.021122149), JUN @ 42 (3.928420791), EZH2 @ 49 (3.859099803), MYC @ 56 (3.825986802), GRB2 @ 65 (3.770730971), RAB7A @ 91 (3.694059873), ESR1 @ 95 (3.677494751)
VAMP2	2087	2.3376	UBA52 @ 58 (3.849143067), CLTC @ 68 (3.829350917), APP @ 91 (3.745785722), INS @ 94 (3.741981928)	KPNA3	1862	2.38723	KPNA2 @ 16 (4.098579501), NFKB1 @ 24 (4.021122149), HDAC1 @ 45 (3.875037284), RELA @ 55 (3.832644555), SIRT1 @ 61 (3.802094612), TP53BP1 @ 78 (3.725074195)
IL4	2104	2.33174	EGFR @ 18 (4.255273461), PIK3CD @ 76 (3.806903236), STAT3 @ 92 (3.744179493)	IL6ST	1867	2.38543	ERBB3 @ 2 (4.731127927), CDK9 @ 40 (3.936164117), ERBB2 @ 53 (3.843354357), AR @ 64 (3.786837043), GRB2 @ 65 (3.770730971), STAT1 @ 72 (3.759329862), STAT3 @ 75 (3.739433125)
IRF3	2111	2.33024	CTNNB1 @ 42 (3.926547961), EP300 @ 44 (3.908165976), HSP90AB1 @ 47 (3.89559168), FOXO1 @ 90 (3.74627242)	IRS2	1877	2.38132	EGFR @ 8 (4.259252678), ELAVL1 @ 12 (4.178507033), CDK1 @ 18 (4.078436677), SRC @ 32 (3.98269232), YWHAE @ 37 (3.946570154), SIRT1 @ 61 (3.802094612), GRB2 @ 65 (3.770730971), AKT1 @ 82 (3.716718023), YWHAB @ 93 (3.686814642), ESR1 @ 95 (3.677494751)
PSMC6	2125	2.32532	CDK2 @ 3 (4.692024128), CYB5R2 @ 37 (3.950721474), GRK2 @ 45 (3.906377942), UBA52 @ 58 (3.849143067), RPS27A @ 64 (3.841632945)	HLA-F	1878	2.38074	STAT1 @ 72 (3.759329862)
TUBA1B	2130	2.32369	GRB2 @ 21 (4.184991908), SHC1 @ 89 (3.749321692)	CXCL1	1885	2.37787	NFKB1 @ 24 (4.021122149), JUN @ 42 (3.928420791), RELA @ 55 (3.832644555), STAT3 @ 75 (3.739433125), ESR1 @ 95 (3.677494751)
ELOC	2140	2.32072	CBX5 @ 60 (3.848006823), RPS27A @ 64 (3.841632945)	CSF2	1897	2.37388	EGFR @ 8 (4.259252678), RUNX1 @ 71 (3.759465655), STAT3 @ 75 (3.739433125)
UBE2N	2150	2.31716	CDK2 @ 3 (4.692024128), TP53 @ 29 (4.011818792), UBA52 @ 58 (3.849143067), RPS27A @ 64 (3.841632945)	GRAP2	1899	2.37276	EGFR @ 8 (4.259252678), SRC @ 32 (3.98269232), YWHAE @ 37 (3.946570154), ERBB2 @ 53 (3.843354357), AR @ 64 (3.786837043), GRB2 @ 65 (3.770730971)
IL3	2161	2.31444	EGFR @ 18 (4.255273461), RUNX1 @ 19 (4.230547681), PIK3CA @ 49 (3.87790566), HRAS @ 55 (3.85675947), PIK3CD @ 76 (3.806903236)	ITGAM	1901	2.37201	SRC @ 32 (3.98269232), STAT1 @ 72 (3.759329862), STAT3 @ 75 (3.739433125)
PSMA3	2196	2.2992	GTF2B @ 15 (4.432465953), KRAS @ 43 (3.922588159), HSP90AB1 @ 47 (3.89559168), UBA52 @ 58 (3.849143067), RPS27A @ 64 (3.841632945)	IFNGR1	1935	2.35718	NFKB1 @ 24 (4.021122149), STAT1 @ 72 (3.759329862), STAT3 @ 75 (3.739433125)
NOS2	2211	2.29559	YWHAE @ 31 (4.000171791), HSP90AB1 @ 47 (3.89559168), NPM1 @ 70 (3.818434018), SRC @ 72 (3.815262485), STAT3 @ 92 (3.744179493), SQOR @ 93 (3.74216698)	CASP1	1936	2.35714	TP53 @ 7 (4.263878027), EGFR @ 8 (4.259252678), NFKB1 @ 24 (4.021122149), AR @ 64 (3.786837043), KEAP1 @ 83 (3.711971154)
IRAK4	2220	2.29358	TBPL1 @ 9 (4.587803787)	HSPA2	1943	2.35386	EGFR @ 8 (4.259252678), CDK1 @ 18 (4.078436677), APP @ 20 (4.06357256), NFKB1 @ 24 (4.021122149), SRC @ 32 (3.98269232), CDK9 @ 40 (3.936164117), JUN @ 42 (3.928420791), HSP90AB1 @ 77 (3.725182879), HSP90AA1 @ 87 (3.706481498)
HSPA2	2249	2.28495	EGFR @ 18 (4.255273461), CDK1 @ 36 (3.960479767), HSP90AB1 @ 47 (3.89559168), SRC @ 72 (3.815262485), APP @ 91 (3.745785722)	TCP1	1966	2.34623	TP53 @ 7 (4.263878027), CDK1 @ 18 (4.078436677), NRF1 @ 22 (4.046253517), NFKB1 @ 24 (4.021122149), CDK9 @ 40 (3.936164117), JUN @ 42 (3.928420791), HDAC1 @ 45 (3.875037284), RELA @ 55 (3.832644555), MYC @ 56 (3.825986802), GRB2 @ 65 (3.770730971), PRKACA @ 69 (3.762362936), HSP90AB1 @ 77 (3.725182879), NPM1 @ 79 (3.723229211), HSP90AA1 @ 87 (3.706481498), CDK2 @ 89 (3.699623682)
USP14	2250	2.28452	CDK1 @ 36 (3.960479767), UBA52 @ 58 (3.849143067), RPS27A @ 64 (3.841632945), FANCC @ 83 (3.776114382)	IFNAR1	1967	2.34605	EP300 @ 3 (4.566455535), NRF1 @ 22 (4.046253517), PRKACA @ 69 (3.762362936), STAT1 @ 72 (3.759329862), STAT3 @ 75 (3.739433125)
ARIH1	2256	2.28311	CDK2 @ 3 (4.692024128), UBA52 @ 58 (3.849143067), RPS27A @ 64 (3.841632945)	IL2RG	1970	2.34427	GRB2 @ 65 (3.770730971), STAT1 @ 72 (3.759329862), STAT3 @ 75 (3.739433125)
RPS6KA3	2261	2.28094	TP53 @ 29 (4.011818792), NRAS @ 41 (3.934319021), KRAS @ 43 (3.922588159), HSP90AB1 @ 47 (3.89559168), HRAS @ 55 (3.85675947), SRC @ 72 (3.815262485), STAT3 @ 92 (3.744179493)	CCL20	1996	2.33815	NFKB1 @ 24 (4.021122149), TRAF6 @ 60 (3.802540496), STAT3 @ 75 (3.739433125)
TBK1	2266	2.27942	YWHAE @ 31 (4.000171791), HSP90AB1 @ 47 (3.89559168), RPS27A @ 64 (3.841632945), SRC @ 72 (3.815262485), APP @ 91 (3.745785722)	EIF4E	2022	2.32818	ELAVL1 @ 12 (4.178507033), APP @ 20 (4.06357256), NRF1 @ 22 (4.046253517), CTNNB1 @ 23 (4.032609254), TRAF6 @ 60 (3.802540496), AKT1 @ 82 (3.716718023)
RIGI	2274	2.27763	UBA52 @ 58 (3.849143067), RPS27A @ 64 (3.841632945), SRC @ 72 (3.815262485)	CXCL2	2024	2.32793	NFKB1 @ 24 (4.021122149), JUN @ 42 (3.928420791), RELA @ 55 (3.832644555), STAT3 @ 75 (3.739433125)
HSPA1L	2304	2.27112	CDK2 @ 3 (4.692024128), EGFR @ 18 (4.255273461), GRB2 @ 21 (4.184991908), TP53 @ 29 (4.011818792), HSP90AB1 @ 47 (3.89559168), PIK3R2 @ 57 (3.849769814), SHC1 @ 89 (3.749321692)	BIRC2	2051	2.31446	EGFR @ 8 (4.259252678), NFKB1 @ 24 (4.021122149), RPS27A @ 35 (3.95946954), UBA52 @ 41 (3.930125003), RELA @ 55 (3.832644555), TRAF6 @ 60 (3.802540496)
TUBA1C	2311	2.26876	CDK2 @ 3 (4.692024128), GRB2 @ 21 (4.184991908), TP53 @ 29 (4.011818792), HSP90AB1 @ 47 (3.89559168), PIK3R2 @ 57 (3.849769814), NPM1 @ 70 (3.818434018), SHC1 @ 89 (3.749321692)	RSAD2	2081	2.30367	IRF1 @ 39 (3.937384347), TRAF6 @ 60 (3.802540496), STAT1 @ 72 (3.759329862)
RIPK2	2328	2.26498	HSP90AB1 @ 47 (3.89559168)	MEF2A	2112	2.29367	EP300 @ 3 (4.566455535), NRF1 @ 22 (4.046253517), CTNNB1 @ 23 (4.032609254), JUN @ 42 (3.928420791), HDAC1 @ 45 (3.875037284), H3-4 @ 88 (3.699941274)
SAMHD1	2335	2.26324	CDK2 @ 3 (4.692024128), CDK1 @ 36 (3.960479767), APP @ 91 (3.745785722)	CFL1	2119	2.29166	EGFR @ 8 (4.259252678), APP @ 20 (4.06357256), NFKB1 @ 24 (4.021122149), ERBB4 @ 29 (3.99164713), SRC @ 32 (3.98269232), H2AX @ 33 (3.978872976), YWHAE @ 37 (3.946570154), UBA52 @ 41 (3.930125003), JUN @ 42 (3.928420791), MYC @ 56 (3.825986802), GRB2 @ 65 (3.770730971), PRKACA @ 69 (3.762362936), NPM1 @ 79 (3.723229211), CDK2 @ 89 (3.699623682), RAB7A @ 91 (3.694059873), ESR1 @ 95 (3.677494751)
NFKB2	2338	2.26169	TP53 @ 29 (4.011818792), SIN3A @ 33 (3.966211795), HSP90AB1 @ 47 (3.89559168), CLTC @ 68 (3.829350917), STAT3 @ 92 (3.744179493)	SOS2	2138	2.28792	EGFR @ 8 (4.259252678), NRF1 @ 22 (4.046253517), SRC @ 32 (3.98269232), GRB2 @ 65 (3.770730971), ESR1 @ 95 (3.677494751)
NUP214	2349	2.25813	NPM1 @ 70 (3.818434018)	TOLLIP	2149	2.28322	ELAVL1 @ 12 (4.178507033), NRF1 @ 22 (4.046253517), ZBTB16 @ 38 (3.943619187), TRAF6 @ 60 (3.802540496)
GHR	2351	2.2573	GRB2 @ 21 (4.184991908), IGF1R @ 23 (4.061111546), PLCG1 @ 73 (3.813392608), SHC1 @ 89 (3.749321692), STAT3 @ 92 (3.744179493)	HLA-DRB5	2165	2.27477	YWHAE @ 37 (3.946570154), HSP90AB1 @ 77 (3.725182879), HSP90AA1 @ 87 (3.706481498)
IFNAR1	2359	2.25388	EP300 @ 44 (3.908165976), STAT3 @ 92 (3.744179493)	SEM1	2167	2.27371	BRCA1 @ 14 (4.109727894), RPS27A @ 35 (3.95946954), FEN1 @ 57 (3.81699797), RAD51 @ 85 (3.708628165), RAD51C @ 92 (3.688085298)
NUP93	2369	2.25097	EGFR @ 18 (4.255273461)	PSMA6	2187	2.26784	BRCA1 @ 14 (4.109727894), CDK1 @ 18 (4.078436677), RPS27A @ 35 (3.95946954), UBA52 @ 41 (3.930125003), JUN @ 42 (3.928420791), MDM2 @ 47 (3.863162591), TRAF6 @ 60 (3.802540496), CDK2 @ 89 (3.699623682)
FASLG	2371	2.25074	GRB2 @ 21 (4.184991908), SRC @ 72 (3.815262485), FOXO1 @ 90 (3.74627242), STAT3 @ 92 (3.744179493)	PTPN1	2194	2.26596	EGFR @ 8 (4.259252678), CDK1 @ 18 (4.078436677), CTNNB1 @ 23 (4.032609254), SRC @ 32 (3.98269232), JUN @ 42 (3.928420791), CDH1 @ 48 (3.861344958), GRB2 @ 65 (3.770730971), STAT3 @ 75 (3.739433125), AKT1 @ 82 (3.716718023), ESR1 @ 95 (3.677494751)
PIAS1	2375	2.24954	TBP @ 13 (4.487899762), TP53 @ 29 (4.011818792), TERF2 @ 48 (3.885006348), STAT3 @ 92 (3.744179493)	ARF1	2197	2.26509	NRF1 @ 22 (4.046253517), JUN @ 42 (3.928420791), MYC @ 56 (3.825986802), NPM1 @ 79 (3.723229211), CDK2 @ 89 (3.699623682), CLTC @ 98 (3.665966184)
INPP5D	2380	2.24817	GRB2 @ 21 (4.184991908), PIK3CA @ 49 (3.87790566), PIK3R2 @ 57 (3.849769814), SRC @ 72 (3.815262485), PLCG1 @ 73 (3.813392608), PIK3CD @ 76 (3.806903236), PIK3CB @ 79 (3.788819698), PIK3R3 @ 88 (3.750814494), SHC1 @ 89 (3.749321692), STAT3 @ 92 (3.744179493), PLCG2 @ 98 (3.731445794)	PSMD13	2201	2.26383	RPS27A @ 35 (3.95946954), UBA52 @ 41 (3.930125003), JUN @ 42 (3.928420791), TRAF6 @ 60 (3.802540496), GRB2 @ 65 (3.770730971)
CSF2RB	2403	2.24276	NRAS @ 41 (3.934319021), KRAS @ 43 (3.922588159), HRAS @ 55 (3.85675947), SHC1 @ 89 (3.749321692), STAT3 @ 92 (3.744179493)	PTPN12	2217	2.25582	EGFR @ 8 (4.259252678), APP @ 20 (4.06357256), CTNNB1 @ 23 (4.032609254), SRC @ 32 (3.98269232), ERBB2 @ 53 (3.843354357), GRB2 @ 65 (3.770730971), PRKACA @ 69 (3.762362936)
PSMD11	2404	2.24276	CDK2 @ 3 (4.692024128), GRB2 @ 21 (4.184991908), TP53 @ 29 (4.011818792), UBA52 @ 58 (3.849143067), RPS27A @ 64 (3.841632945), APP @ 91 (3.745785722)	PSMD14	2219	2.25444	RPS27A @ 35 (3.95946954), UBA52 @ 41 (3.930125003), JUN @ 42 (3.928420791), TRAF6 @ 60 (3.802540496), GRB2 @ 65 (3.770730971)
PSMA6	2416	2.23955	CDK2 @ 3 (4.692024128), CDK1 @ 36 (3.960479767), UBA52 @ 58 (3.849143067), RPS27A @ 64 (3.841632945)	MAVS	2224	2.25223	NFKB1 @ 24 (4.021122149), SRC @ 32 (3.98269232), RPS27A @ 35 (3.95946954), UBA52 @ 41 (3.930125003), RELA @ 55 (3.832644555), TRAF6 @ 60 (3.802540496), STAT1 @ 72 (3.759329862), HSP90AB1 @ 77 (3.725182879), HSP90AA1 @ 87 (3.706481498)
UBE2D2	2426	2.238	TP53 @ 29 (4.011818792), CTNNB1 @ 42 (3.926547961), UBA52 @ 58 (3.849143067), RPS27A @ 64 (3.841632945)	PSMA7	2227	2.25168	EGFR @ 8 (4.259252678), APP @ 20 (4.06357256), NFKB1 @ 24 (4.021122149), RPS27A @ 35 (3.95946954), UBA52 @ 41 (3.930125003), JUN @ 42 (3.928420791), MDM2 @ 47 (3.863162591), MYC @ 56 (3.825986802), SIRT1 @ 61 (3.802094612), HSP90AB1 @ 77 (3.725182879), RAB7A @ 91 (3.694059873)
P4HB	2442	2.23437	CDK2 @ 3 (4.692024128), EGFR @ 18 (4.255273461), HSP90AB1 @ 47 (3.89559168), INS @ 94 (3.741981928)	TWIST1	2232	2.25041	EP300 @ 3 (4.566455535), TP53 @ 7 (4.263878027), HDAC2 @ 31 (3.989763953), CDK9 @ 40 (3.936164117), HDAC1 @ 45 (3.875037284), SOX9 @ 50 (3.856009024), RELA @ 55 (3.832644555), MYC @ 56 (3.825986802), DNMT3B @ 66 (3.768542304), SOX2 @ 70 (3.761055665), STAT3 @ 75 (3.739433125), AKT1 @ 82 (3.716718023), ESR1 @ 95 (3.677494751)
NOD1	2501	2.2175	HSP90AB1 @ 47 (3.89559168), UBA52 @ 58 (3.849143067), RPS27A @ 64 (3.841632945)	ADAM17	2243	2.24748	APP @ 20 (4.06357256), ERBB4 @ 29 (3.99164713)
ADAM17	2512	2.21552	FHL2 @ 82 (3.784994951), ERBB4 @ 84 (3.769879596), APP @ 91 (3.745785722)	PSMD11	2245	2.24682	TP53 @ 7 (4.263878027), APP @ 20 (4.06357256), RPS27A @ 35 (3.95946954), ZBTB16 @ 38 (3.943619187), UBA52 @ 41 (3.930125003), JUN @ 42 (3.928420791), TRAF6 @ 60 (3.802540496), GRB2 @ 65 (3.770730971), PRKACA @ 69 (3.762362936), CDK2 @ 89 (3.699623682)
IRAK1	2531	2.20849	HRAS @ 55 (3.85675947), STAT3 @ 92 (3.744179493)	PSMC5	2248	2.24547	TP53 @ 7 (4.263878027), RPS27A @ 35 (3.95946954), UBA52 @ 41 (3.930125003), JUN @ 42 (3.928420791), MDM2 @ 47 (3.863162591), MYC @ 56 (3.825986802), TRAF6 @ 60 (3.802540496), PRKACA @ 69 (3.762362936), TP53BP1 @ 78 (3.725074195), NPM1 @ 79 (3.723229211), AKT1 @ 82 (3.716718023), H3-4 @ 88 (3.699941274), CDK2 @ 89 (3.699623682), ESR1 @ 95 (3.677494751)
HLA-DRB5	2537	2.20643	YWHAE @ 31 (4.000171791), HSP90AB1 @ 47 (3.89559168)	NUP62	2272	2.23838	KPNA2 @ 16 (4.098579501), NRF1 @ 22 (4.046253517), CTNNB1 @ 23 (4.032609254), NPM1 @ 79 (3.723229211)
PSMD14	2557	2.1996	GRB2 @ 21 (4.184991908), UBA52 @ 58 (3.849143067), RPS27A @ 64 (3.841632945)	PSME3	2273	2.23779	TP53 @ 7 (4.263878027), CHEK2 @ 10 (4.196264648), MDM2 @ 47 (3.863162591), SIRT1 @ 61 (3.802094612), NPM1 @ 79 (3.723229211)
TRIM21	2574	2.19482	CDK2 @ 3 (4.692024128), EGFR @ 18 (4.255273461), HSP90AB1 @ 47 (3.89559168), UBA52 @ 58 (3.849143067), RPS27A @ 64 (3.841632945), ERBB2 @ 67 (3.830356053), NPM1 @ 70 (3.818434018)	MMP1	2283	2.23147	JUN @ 42 (3.928420791), STAT3 @ 75 (3.739433125)
IL7R	2580	2.19358	GRB2 @ 21 (4.184991908), YWHAB @ 75 (3.807771122), STAT3 @ 92 (3.744179493)	IFNG	2302	2.22635	EGFR @ 8 (4.259252678), FOXP3 @ 34 (3.966832631), RUNX1 @ 71 (3.759465655), STAT1 @ 72 (3.759329862)
IFNA1	2587	2.19155	EGFR @ 18 (4.255273461)	NUP98	2312	2.22054	EP300 @ 3 (4.566455535), CDK1 @ 18 (4.078436677), CTNNB1 @ 23 (4.032609254), HDAC1 @ 45 (3.875037284), MYC @ 56 (3.825986802), NPM1 @ 79 (3.723229211), CDK2 @ 89 (3.699623682)
IL4R	2598	2.18882	SHC1 @ 89 (3.749321692), STAT3 @ 92 (3.744179493)	IFNAR2	2317	2.21875	EP300 @ 3 (4.566455535), STAT1 @ 72 (3.759329862), STAT3 @ 75 (3.739433125)
LMNB1	2614	2.18577	CDK1 @ 36 (3.960479767), CTNNB1 @ 42 (3.926547961), NPM1 @ 70 (3.818434018)	IL4R	2321	2.21772	MYC @ 56 (3.825986802), STAT1 @ 72 (3.759329862), STAT3 @ 75 (3.739433125)
RALA	2628	2.1826	KRAS @ 43 (3.922588159), HRAS @ 55 (3.85675947), SRC @ 72 (3.815262485)	PSMC3	2338	2.21237	TP53 @ 7 (4.263878027), NFKB1 @ 24 (4.021122149), RPS27A @ 35 (3.95946954), UBA52 @ 41 (3.930125003), JUN @ 42 (3.928420791), MDM2 @ 47 (3.863162591), MYC @ 56 (3.825986802), TRAF6 @ 60 (3.802540496), AR @ 64 (3.786837043), STAT1 @ 72 (3.759329862)
CIITA	2644	2.17707	GTF2B @ 15 (4.432465953), CDK1 @ 36 (3.960479767), SIN3B @ 96 (3.733086083)	LMNB1	2355	2.20604	ELAVL1 @ 12 (4.178507033), BRCA1 @ 14 (4.109727894), CDK1 @ 18 (4.078436677), CTNNB1 @ 23 (4.032609254), NFKB1 @ 24 (4.021122149), SMARCA4 @ 27 (4.004652833), JUN @ 42 (3.928420791), NPM1 @ 79 (3.723229211), AKT1 @ 82 (3.716718023)
IL2RG	2646	2.17585	GRB2 @ 21 (4.184991908), SIN3A @ 33 (3.966211795), SHC1 @ 89 (3.749321692), STAT3 @ 92 (3.744179493)	UBE2M	2363	2.20419	TP53 @ 7 (4.263878027), APP @ 20 (4.06357256), NRF1 @ 22 (4.046253517), RPS27A @ 35 (3.95946954), JUN @ 42 (3.928420791), MDM2 @ 47 (3.863162591), TRAF6 @ 60 (3.802540496), CDK2 @ 89 (3.699623682)
TEC	2699	2.16383	GRB2 @ 21 (4.184991908), TP53 @ 29 (4.011818792), PIK3R2 @ 57 (3.849769814), ERBB2 @ 67 (3.830356053), PLCG1 @ 73 (3.813392608), PIK3R3 @ 88 (3.750814494), SHC1 @ 89 (3.749321692), PLCG2 @ 98 (3.731445794)	TUBB4B	2382	2.19627	EGFR @ 8 (4.259252678), NRF1 @ 22 (4.046253517), NFKB1 @ 24 (4.021122149), YWHAE @ 37 (3.946570154), CDK9 @ 40 (3.936164117), JUN @ 42 (3.928420791), EZH2 @ 49 (3.859099803), GRB2 @ 65 (3.770730971), PRKACA @ 69 (3.762362936), AKT1 @ 82 (3.716718023), HSP90AA1 @ 87 (3.706481498), CDK2 @ 89 (3.699623682), RAB7A @ 91 (3.694059873), YWHAB @ 93 (3.686814642)
PSMD3	2739	2.15301	CDK2 @ 3 (4.692024128), GRK2 @ 45 (3.906377942), UBA52 @ 58 (3.849143067), RPS27A @ 64 (3.841632945), PLCG2 @ 98 (3.731445794)	IRAK1	2401	2.18903	NFKB1 @ 24 (4.021122149), JUN @ 42 (3.928420791), RELA @ 55 (3.832644555), MYC @ 56 (3.825986802), TRAF6 @ 60 (3.802540496), STAT1 @ 72 (3.759329862), STAT3 @ 75 (3.739433125), AKT1 @ 82 (3.716718023), HSP90AA1 @ 87 (3.706481498), H3-4 @ 88 (3.699941274)
MAP3K14	2756	2.14739	EGFR @ 18 (4.255273461), HSP90AB1 @ 47 (3.89559168), NPM1 @ 70 (3.818434018)	TUBB2A	2406	2.18526	TP53 @ 7 (4.263878027), EGFR @ 8 (4.259252678), NFKB1 @ 24 (4.021122149), YWHAE @ 37 (3.946570154), JUN @ 42 (3.928420791), MDM2 @ 47 (3.863162591), SOX2 @ 70 (3.761055665), CDK2 @ 89 (3.699623682), RAB7A @ 91 (3.694059873)
BLNK	2768	2.14374	GRB2 @ 21 (4.184991908), ERBB2 @ 67 (3.830356053), PLCG1 @ 73 (3.813392608), PIK3CD @ 76 (3.806903236), PLCG2 @ 98 (3.731445794)	PSMC2	2407	2.18519	NFKB1 @ 24 (4.021122149), RPS27A @ 35 (3.95946954), UBA52 @ 41 (3.930125003), JUN @ 42 (3.928420791), MYC @ 56 (3.825986802), TRAF6 @ 60 (3.802540496), GRB2 @ 65 (3.770730971), ESR1 @ 95 (3.677494751)
UBE2D3	2770	2.14361	TP53 @ 29 (4.011818792), UBA52 @ 58 (3.849143067), RPS27A @ 64 (3.841632945)	IRF5	2409	2.1837	EP300 @ 3 (4.566455535), IRF1 @ 39 (3.937384347), HDAC1 @ 45 (3.875037284), RELA @ 55 (3.832644555), TRAF6 @ 60 (3.802540496), GRB2 @ 65 (3.770730971), STAT1 @ 72 (3.759329862)
PPP2R5A	2779	2.14152	CBX5 @ 60 (3.848006823), SHC1 @ 89 (3.749321692)	TRIM21	2410	2.18362	EGFR @ 8 (4.259252678), RPS27A @ 35 (3.95946954), UBA52 @ 41 (3.930125003), HDAC1 @ 45 (3.875037284), ERBB2 @ 53 (3.843354357), MYC @ 56 (3.825986802), STAT1 @ 72 (3.759329862), HSP90AB1 @ 77 (3.725182879), NPM1 @ 79 (3.723229211), CDK2 @ 89 (3.699623682)
TAB2	2796	2.13656	YWHAE @ 31 (4.000171791), SIN3A @ 33 (3.966211795), UBA52 @ 58 (3.849143067), RPS27A @ 64 (3.841632945), CLTC @ 68 (3.829350917), NPM1 @ 70 (3.818434018), ERBB4 @ 84 (3.769879596), APP @ 91 (3.745785722)	PAK2	2441	2.17164	EP300 @ 3 (4.566455535), ELAVL1 @ 12 (4.178507033), APP @ 20 (4.06357256), SRC @ 32 (3.98269232), YWHAE @ 37 (3.946570154), JUN @ 42 (3.928420791), MYC @ 56 (3.825986802), GRB2 @ 65 (3.770730971), YWHAB @ 93 (3.686814642)
PSMD8	2808	2.1323	CDK2 @ 3 (4.692024128), UBA52 @ 58 (3.849143067), RPS27A @ 64 (3.841632945)	IL1A	2447	2.17063	NFKB1 @ 24 (4.021122149), JUN @ 42 (3.928420791), RELA @ 55 (3.832644555), TRAF6 @ 60 (3.802540496), STAT3 @ 75 (3.739433125)
SNAP25	2827	2.12762	EGFR @ 18 (4.255273461), APP @ 91 (3.745785722)	SH2B3	2455	2.16995	ERBB3 @ 2 (4.731127927), EGFR @ 8 (4.259252678), ELAVL1 @ 12 (4.178507033), ERBB2 @ 53 (3.843354357), GRB2 @ 65 (3.770730971)
HMOX1	2845	2.12431	TERF1 @ 65 (3.835912394), STAT3 @ 92 (3.744179493)	TUBB3	2504	2.15106	TP53 @ 7 (4.263878027), EGFR @ 8 (4.259252678), ELAVL1 @ 12 (4.178507033), NFKB1 @ 24 (4.021122149), JUN @ 42 (3.928420791), MYC @ 56 (3.825986802), GRB2 @ 65 (3.770730971), SOX2 @ 70 (3.761055665), NPM1 @ 79 (3.723229211), ESR1 @ 95 (3.677494751)
MAVS	2850	2.1229	HSP90AB1 @ 47 (3.89559168), UBA52 @ 58 (3.849143067), RPS27A @ 64 (3.841632945), SRC @ 72 (3.815262485)	RAG1	2511	2.1485	KPNA2 @ 16 (4.098579501), MYC @ 56 (3.825986802), HSP90AB1 @ 77 (3.725182879), HSP90AA1 @ 87 (3.706481498), H3-4 @ 88 (3.699941274)
BCL2L11	2866	2.11833	CDK1 @ 36 (3.960479767), KRAS @ 43 (3.922588159), SRC @ 72 (3.815262485), YWHAB @ 75 (3.807771122), FOXO1 @ 90 (3.74627242), APP @ 91 (3.745785722)	IL10RB	2515	2.14754	STAT1 @ 72 (3.759329862), STAT3 @ 75 (3.739433125)
MEF2C	2868	2.11806	CDK1 @ 36 (3.960479767), CTNNB1 @ 42 (3.926547961), EP300 @ 44 (3.908165976)	CCL3	2524	2.14465	STAT3 @ 75 (3.739433125)
PSMD1	2871	2.11706	HSP90AB1 @ 47 (3.89559168), UBA52 @ 58 (3.849143067), RPS27A @ 64 (3.841632945), NPM1 @ 70 (3.818434018)	IFIT5	2533	2.14125	ELAVL1 @ 12 (4.178507033), NRF1 @ 22 (4.046253517), IRF1 @ 39 (3.937384347), STAT1 @ 72 (3.759329862)
PSMA7	2904	2.10967	EGFR @ 18 (4.255273461), HSP90AB1 @ 47 (3.89559168), UBA52 @ 58 (3.849143067), RPS27A @ 64 (3.841632945), TERF1 @ 65 (3.835912394), APP @ 91 (3.745785722)	PRL	2542	2.13745	EGFR @ 8 (4.259252678), STAT3 @ 75 (3.739433125)
PSMC1	2911	2.1086	TP53 @ 29 (4.011818792), GRK2 @ 45 (3.906377942), UBA52 @ 58 (3.849143067), RPS27A @ 64 (3.841632945), APP @ 91 (3.745785722)	TUBA8	2546	2.1371	MYC @ 56 (3.825986802)
IL3RA	2912	2.10853	GRB2 @ 21 (4.184991908), CDK1 @ 36 (3.960479767), NRAS @ 41 (3.934319021), KRAS @ 43 (3.922588159), HRAS @ 55 (3.85675947), PLCG1 @ 73 (3.813392608)	TAB1	2557	2.13456	EGFR @ 8 (4.259252678), NFKB1 @ 24 (4.021122149), MDM2 @ 47 (3.863162591), RELA @ 55 (3.832644555), TRAF6 @ 60 (3.802540496), GRB2 @ 65 (3.770730971), HSP90AB1 @ 77 (3.725182879), NPM1 @ 79 (3.723229211), HSP90AA1 @ 87 (3.706481498)
IFNA2	2913	2.1084	EGFR @ 18 (4.255273461)	LCN2	2569	2.13061	APP @ 20 (4.06357256), STAT3 @ 75 (3.739433125)
TRAF3	2915	2.10747	HRAS @ 55 (3.85675947), UBA52 @ 58 (3.849143067), RPS27A @ 64 (3.841632945), SRC @ 72 (3.815262485)	IL32	2581	2.127	ZBTB16 @ 38 (3.943619187)
HLA-A	2939	2.10252	GNAS @ 27 (4.026244404), ERBB2 @ 67 (3.830356053), SRC @ 72 (3.815262485), STAT3 @ 92 (3.744179493), INS @ 94 (3.741981928)	USP14	2613	2.11698	CDK1 @ 18 (4.078436677), RPS27A @ 35 (3.95946954), UBA52 @ 41 (3.930125003), AR @ 64 (3.786837043), AKT1 @ 82 (3.716718023)
PAK2	2947	2.10118	GRB2 @ 21 (4.184991908), YWHAE @ 31 (4.000171791), EP300 @ 44 (3.908165976), SRC @ 72 (3.815262485), YWHAB @ 75 (3.807771122), APP @ 91 (3.745785722)	PPIA	2622	2.1142	ELAVL1 @ 12 (4.178507033), APP @ 20 (4.06357256), NRF1 @ 22 (4.046253517), H2AX @ 33 (3.978872976), JUN @ 42 (3.928420791), GRB2 @ 65 (3.770730971), HSP90AB1 @ 77 (3.725182879), NPM1 @ 79 (3.723229211), AKT1 @ 82 (3.716718023), HSP90AA1 @ 87 (3.706481498), CDK2 @ 89 (3.699623682), POU5F1 @ 90 (3.694597021), ESR1 @ 95 (3.677494751)
IFNB1	2949	2.10091	EGFR @ 18 (4.255273461)	IL12RB1	2635	2.11012	STAT1 @ 72 (3.759329862), STAT3 @ 75 (3.739433125)
IL13	2959	2.09769	EGFR @ 18 (4.255273461), STAT3 @ 92 (3.744179493)	RIPK2	2642	2.1082	NRF1 @ 22 (4.046253517), NFKB1 @ 24 (4.021122149), TRAF6 @ 60 (3.802540496), HSP90AB1 @ 77 (3.725182879), HSP90AA1 @ 87 (3.706481498)
OSM	2961	2.09714	EGFR @ 18 (4.255273461), APP @ 91 (3.745785722), STAT3 @ 92 (3.744179493)	PSMA4	2645	2.10741	NRF1 @ 22 (4.046253517), NFKB1 @ 24 (4.021122149), HDAC2 @ 31 (3.989763953), RPS27A @ 35 (3.95946954), UBA52 @ 41 (3.930125003), JUN @ 42 (3.928420791), MYC @ 56 (3.825986802), TRAF6 @ 60 (3.802540496), SIRT1 @ 61 (3.802094612)
PPP2R5D	2969	2.09634	YWHAB @ 75 (3.807771122)	IL13	2653	2.10517	EGFR @ 8 (4.259252678), STAT1 @ 72 (3.759329862), STAT3 @ 75 (3.739433125)
PSMD7	2995	2.08944	TST @ 52 (3.866256659), UBA52 @ 58 (3.849143067), RPS27A @ 64 (3.841632945)	IL3RA	2664	2.10131	CDK1 @ 18 (4.078436677), GRB2 @ 65 (3.770730971)
HLA-DQB1	3003	2.08794	INS @ 94 (3.741981928)	MCL1	2667	2.10008	TP53 @ 7 (4.263878027), CDK1 @ 18 (4.078436677), ERBB2 @ 53 (3.843354357), MYC @ 56 (3.825986802), TRAF6 @ 60 (3.802540496), STAT1 @ 72 (3.759329862), STAT3 @ 75 (3.739433125), AKT1 @ 82 (3.716718023), HSP90AA1 @ 87 (3.706481498), CDK2 @ 89 (3.699623682)
LIF	3006	2.08636	EGFR @ 18 (4.255273461), STAT3 @ 92 (3.744179493)	PSME1	2668	2.09995	APP @ 20 (4.06357256), IRF1 @ 39 (3.937384347), UBA52 @ 41 (3.930125003), GRB2 @ 65 (3.770730971)
PSMA2	3023	2.08231	HSP90AB1 @ 47 (3.89559168), UBA52 @ 58 (3.849143067), RPS27A @ 64 (3.841632945), TERF1 @ 65 (3.835912394)	EIF4A2	2672	2.09871	BRCA1 @ 14 (4.109727894)
IL15RA	3035	2.07918	CDK2 @ 3 (4.692024128), STAT3 @ 92 (3.744179493)	CCL22	2678	2.09755	STAT3 @ 75 (3.739433125)
S100B	3037	2.0786	TP53 @ 29 (4.011818792), APP @ 91 (3.745785722)	NUP214	2688	2.09306	SOX2 @ 70 (3.761055665), NPM1 @ 79 (3.723229211)
HLA-C	3068	2.07102	CLTC @ 68 (3.829350917)	PSME2	2690	2.09287	APP @ 20 (4.06357256), IRF1 @ 39 (3.937384347)
PPM1B	3070	2.07063	CDK2 @ 3 (4.692024128), GRB2 @ 21 (4.184991908), YWHAE @ 31 (4.000171791)	SOCS2	2695	2.09152	STAT1 @ 72 (3.759329862), STAT3 @ 75 (3.739433125)
CAMK2D	3071	2.0706	GRB2 @ 21 (4.184991908), HSP90AB1 @ 47 (3.89559168)	PTPRJ	2706	2.08875	EGFR @ 8 (4.259252678), CTNNB1 @ 23 (4.032609254), SRC @ 32 (3.98269232), ERBB2 @ 53 (3.843354357), GRB2 @ 65 (3.770730971)
THOC5	3073	2.07033	SRC @ 72 (3.815262485), SHC1 @ 89 (3.749321692), PLCG2 @ 98 (3.731445794)	IL24	2712	2.0868	EGFR @ 8 (4.259252678), CHEK2 @ 10 (4.196264648), ATM @ 59 (3.803938404), STAT3 @ 75 (3.739433125), AKT1 @ 82 (3.716718023), RAD51 @ 85 (3.708628165)
HSPA1B	3094	2.0666	EGFR @ 18 (4.255273461), TP53 @ 29 (4.011818792), HSP90AB1 @ 47 (3.89559168), YWHAB @ 75 (3.807771122)	STX1A	2713	2.08672	NRF1 @ 22 (4.046253517), MDM2 @ 47 (3.863162591)
UBA3	3096	2.06632	PAPSS1 @ 54 (3.85901715), UBA52 @ 58 (3.849143067)	TPR	2739	2.08049	CDK1 @ 18 (4.078436677), NRF1 @ 22 (4.046253517), NFKB1 @ 24 (4.021122149), JUN @ 42 (3.928420791), MDM2 @ 47 (3.863162591), TRAF6 @ 60 (3.802540496), PRKACA @ 69 (3.762362936), NPM1 @ 79 (3.723229211), CDK2 @ 89 (3.699623682)
SEM1	3098	2.06595	SIN3A @ 33 (3.966211795), RPS27A @ 64 (3.841632945)	PSMB1	2753	2.07639	RPS27A @ 35 (3.95946954), UBA52 @ 41 (3.930125003), JUN @ 42 (3.928420791), MYC @ 56 (3.825986802)
STAT4	3102	2.06538	EP300 @ 44 (3.908165976), STAT3 @ 92 (3.744179493)	PSMA5	2757	2.0754	APP @ 20 (4.06357256), FOXP3 @ 34 (3.966832631), RPS27A @ 35 (3.95946954), UBA52 @ 41 (3.930125003), MYC @ 56 (3.825986802), SIRT1 @ 61 (3.802094612), CDK2 @ 89 (3.699623682)
RNF7	3115	2.06184	CYCS @ 81 (3.787614979)	NOS2	2771	2.07236	SRC @ 32 (3.98269232), YWHAE @ 37 (3.946570154), STAT1 @ 72 (3.759329862), STAT3 @ 75 (3.739433125), HSP90AB1 @ 77 (3.725182879), NPM1 @ 79 (3.723229211), AKT1 @ 82 (3.716718023), HSP90AA1 @ 87 (3.706481498)
TALDO1	3125	2.05964	CDK2 @ 3 (4.692024128), TERF2 @ 48 (3.885006348), TERF1 @ 65 (3.835912394)	PSMB2	2787	2.06936	RPS27A @ 35 (3.95946954), UBA52 @ 41 (3.930125003), TRAF6 @ 60 (3.802540496)
TNFRSF18	3135	2.05752	RUNX1 @ 19 (4.230547681), FOXP3 @ 40 (3.94032475)	MAP3K3	2790	2.06851	EGFR @ 8 (4.259252678), BRCA1 @ 14 (4.109727894), RPS27A @ 35 (3.95946954), YWHAE @ 37 (3.946570154), ZBTB16 @ 38 (3.943619187), UBA52 @ 41 (3.930125003), TRAF6 @ 60 (3.802540496), PRKACA @ 69 (3.762362936), HSP90AB1 @ 77 (3.725182879), AKT1 @ 82 (3.716718023), HSP90AA1 @ 87 (3.706481498), YWHAB @ 93 (3.686814642), CLTC @ 98 (3.665966184)
OPRD1	3147	2.05469	GRK2 @ 45 (3.906377942), POMC @ 56 (3.852283734), GNB1 @ 80 (3.788808915), GNG2 @ 86 (3.766846214)	UBA3	2791	2.06846	UBA52 @ 41 (3.930125003)
FCGR1A	3151	2.05457	SRC @ 72 (3.815262485), SHC1 @ 89 (3.749321692), INS @ 94 (3.741981928)	CSF2RB	2808	2.06185	STAT1 @ 72 (3.759329862), STAT3 @ 75 (3.739433125), AKT1 @ 82 (3.716718023)
PSMD12	3153	2.05435	UBA52 @ 58 (3.849143067), RPS27A @ 64 (3.841632945), NPM1 @ 70 (3.818434018)	FASLG	2852	2.04619	SRC @ 32 (3.98269232), SIRT1 @ 61 (3.802094612), GRB2 @ 65 (3.770730971), STAT3 @ 75 (3.739433125)
IL2RB	3158	2.05292	GRB2 @ 21 (4.184991908), SHC1 @ 89 (3.749321692), STAT3 @ 92 (3.744179493)	ITGAX	2859	2.04426	SRC @ 32 (3.98269232), STAT1 @ 72 (3.759329862), STAT3 @ 75 (3.739433125)
TWIST1	3160	2.05237	TP53 @ 29 (4.011818792), EP300 @ 44 (3.908165976), STAT3 @ 92 (3.744179493)	RPS6KA3	2870	2.04049	TP53 @ 7 (4.263878027), SRC @ 32 (3.98269232), H2AX @ 33 (3.978872976), STAT3 @ 75 (3.739433125), HSP90AB1 @ 77 (3.725182879), HSP90AA1 @ 87 (3.706481498), H3-4 @ 88 (3.699941274), ESR1 @ 95 (3.677494751)
IL9	3178	2.04814	EGFR @ 18 (4.255273461), FOXP3 @ 40 (3.94032475), STAT3 @ 92 (3.744179493)	PSMD7	2873	2.03981	RPS27A @ 35 (3.95946954), UBA52 @ 41 (3.930125003), JUN @ 42 (3.928420791), TRAF6 @ 60 (3.802540496)
PSMC4	3205	2.04309	GRK2 @ 45 (3.906377942), UBA52 @ 58 (3.849143067), RPS27A @ 64 (3.841632945), NPM1 @ 70 (3.818434018)	TUBA1C	2883	2.0369	TP53 @ 7 (4.263878027), NFKB1 @ 24 (4.021122149), CDK9 @ 40 (3.936164117), MDM2 @ 47 (3.863162591), GRB2 @ 65 (3.770730971), HSP90AB1 @ 77 (3.725182879), NPM1 @ 79 (3.723229211), CDK2 @ 89 (3.699623682), RAB7A @ 91 (3.694059873)
CCR5	3210	2.04146	GRK2 @ 45 (3.906377942), PIK3R2 @ 57 (3.849769814), GNB1 @ 80 (3.788808915), GNG2 @ 86 (3.766846214), STAT3 @ 92 (3.744179493)	TRIM25	2885	2.0357	TP53 @ 7 (4.263878027), RPS27A @ 35 (3.95946954), UBA52 @ 41 (3.930125003), JUN @ 42 (3.928420791), EZH2 @ 49 (3.859099803), TRAF6 @ 60 (3.802540496), STAT1 @ 72 (3.759329862), ESR1 @ 95 (3.677494751)
IFNA5	3212	2.04122	EGFR @ 18 (4.255273461), APP @ 91 (3.745785722)	PSMB3	2902	2.03116	TP53 @ 7 (4.263878027), H2AX @ 33 (3.978872976), RPS27A @ 35 (3.95946954), UBA52 @ 41 (3.930125003), JUN @ 42 (3.928420791), MYC @ 56 (3.825986802), TRAF6 @ 60 (3.802540496)
SP100	3214	2.04114	TP53 @ 29 (4.011818792), TERF2 @ 48 (3.885006348), CBX5 @ 60 (3.848006823), TERF1 @ 65 (3.835912394)	PSMD12	2940	2.01976	RPS27A @ 35 (3.95946954), UBA52 @ 41 (3.930125003), JUN @ 42 (3.928420791), TRAF6 @ 60 (3.802540496), NPM1 @ 79 (3.723229211)
PSMB6	3221	2.03932	CDK2 @ 3 (4.692024128), UBA52 @ 58 (3.849143067), RPS27A @ 64 (3.841632945)	SEC13	2941	2.01968	EGFR @ 8 (4.259252678), CLTC @ 98 (3.665966184)
IFNA10	3229	2.0372	EGFR @ 18 (4.255273461)	LIFR	2945	2.01863	GRB2 @ 65 (3.770730971), RUNX1 @ 71 (3.759465655), STAT1 @ 72 (3.759329862), STAT3 @ 75 (3.739433125)
IFNA4	3232	2.03651	EGFR @ 18 (4.255273461)	RPS6KA5	2954	2.01533	EP300 @ 3 (4.566455535), H3C13 @ 28 (3.995298939), H3C12 @ 30 (3.990523587), EZH2 @ 49 (3.859099803), H3-3B @ 54 (3.833825465), RELA @ 55 (3.832644555), PRKACA @ 69 (3.762362936), STAT1 @ 72 (3.759329862), STAT3 @ 75 (3.739433125), HSP90AB1 @ 77 (3.725182879), H3-4 @ 88 (3.699941274)
IFNA21	3241	2.03454	EGFR @ 18 (4.255273461)	PSMD1	2959	2.0143	RPS27A @ 35 (3.95946954), UBA52 @ 41 (3.930125003), JUN @ 42 (3.928420791), MDM2 @ 47 (3.863162591), TRAF6 @ 60 (3.802540496), SIRT1 @ 61 (3.802094612), HSP90AB1 @ 77 (3.725182879), NPM1 @ 79 (3.723229211), HSP90AA1 @ 87 (3.706481498), ESR1 @ 95 (3.677494751)
IFNA7	3248	2.03273	EGFR @ 18 (4.255273461)	PSMA2	2968	2.01114	NRF1 @ 22 (4.046253517), RPS27A @ 35 (3.95946954), UBA52 @ 41 (3.930125003), JUN @ 42 (3.928420791), MYC @ 56 (3.825986802), TRAF6 @ 60 (3.802540496), SIRT1 @ 61 (3.802094612), HSP90AB1 @ 77 (3.725182879)
RORC	3261	2.03036	FOXP3 @ 40 (3.94032475), STAT3 @ 92 (3.744179493)	NOD2	2995	2.00398	NFKB1 @ 24 (4.021122149), TRAF6 @ 60 (3.802540496)
NUP210	3262	2.03034	CDK1 @ 36 (3.960479767)	PSMC6	2997	2.00293	RPS27A @ 35 (3.95946954), UBA52 @ 41 (3.930125003), JUN @ 42 (3.928420791), MDM2 @ 47 (3.863162591), MYC @ 56 (3.825986802), TRAF6 @ 60 (3.802540496), CDK2 @ 89 (3.699623682)
IFNAR2	3264	2.03027	EP300 @ 44 (3.908165976), STAT3 @ 92 (3.744179493)	HNRNPF	2998	2.00284	EGFR @ 8 (4.259252678), ELAVL1 @ 12 (4.178507033), NFKB1 @ 24 (4.021122149), JUN @ 42 (3.928420791), MYC @ 56 (3.825986802), GRB2 @ 65 (3.770730971), CDK2 @ 89 (3.699623682), ESR1 @ 95 (3.677494751)
IFNA8	3280	2.02691	EGFR @ 18 (4.255273461), APP @ 91 (3.745785722)	RORA	3001	2.00224	EP300 @ 3 (4.566455535), FOXP3 @ 34 (3.966832631), NR0B1 @ 46 (3.864347127), EZH2 @ 49 (3.859099803), MED1 @ 84 (3.711224374)
IFNA14	3287	2.02598	EGFR @ 18 (4.255273461)	IL18	3008	2.00021	NFKB1 @ 24 (4.021122149), JUN @ 42 (3.928420791), RELA @ 55 (3.832644555), STAT3 @ 75 (3.739433125)
PSMA4	3288	2.02588	IKZF1 @ 28 (4.018602888), UBA52 @ 58 (3.849143067), RPS27A @ 64 (3.841632945)	HSPA1B	3010	1.99994	TP53 @ 7 (4.263878027), EGFR @ 8 (4.259252678), EZH2 @ 49 (3.859099803), SIRT1 @ 61 (3.802094612), AR @ 64 (3.786837043), PRKACA @ 69 (3.762362936), HSP90AB1 @ 77 (3.725182879), HSP90AA1 @ 87 (3.706481498), YWHAB @ 93 (3.686814642)
RAG2	3332	2.01276	FOXO1 @ 90 (3.74627242)	IFI27	3032	1.99084	STAT1 @ 72 (3.759329862), BMPR1B @ 76 (3.725317326)
TNFRSF1B	3337	2.01148	CLTC @ 68 (3.829350917)	LIF	3037	1.99006	EGFR @ 8 (4.259252678), STAT3 @ 75 (3.739433125)
NUP160	3342	2.01043	FOXP3 @ 40 (3.94032475)	NUP93	3060	1.98415	EGFR @ 8 (4.259252678), ELAVL1 @ 12 (4.178507033), PNKP @ 26 (4.016412119), MYC @ 56 (3.825986802), SOX2 @ 70 (3.761055665)
IL13RA1	3360	2.00726	STAT3 @ 92 (3.744179493)	HSPA1L	3065	1.98236	TP53 @ 7 (4.263878027), EGFR @ 8 (4.259252678), NFKB1 @ 24 (4.021122149), H2AX @ 33 (3.978872976), JUN @ 42 (3.928420791), RELA @ 55 (3.832644555), TRAF6 @ 60 (3.802540496), SIRT1 @ 61 (3.802094612), GRB2 @ 65 (3.770730971), HSP90AB1 @ 77 (3.725182879), HSP90AA1 @ 87 (3.706481498), CDK2 @ 89 (3.699623682), ESR1 @ 95 (3.677494751)
IL7	3374	2.00469	EGFR @ 18 (4.255273461), APP @ 91 (3.745785722)	RAPGEF1	3066	1.98236	EGFR @ 8 (4.259252678), SRC @ 32 (3.98269232), CDH1 @ 48 (3.861344958), GRB2 @ 65 (3.770730971)
HAVCR2	3401	1.99735	FOXP3 @ 40 (3.94032475), PLCG1 @ 73 (3.813392608), APP @ 91 (3.745785722)	RALA	3070	1.98072	ELAVL1 @ 12 (4.178507033), SRC @ 32 (3.98269232), AKT1 @ 82 (3.716718023)
EIF4E2	3410	1.99476	YWHAE @ 31 (4.000171791), YWHAB @ 75 (3.807771122), APP @ 91 (3.745785722)	SP100	3101	1.97095	TP53 @ 7 (4.263878027), H3C13 @ 28 (3.995298939), H3C12 @ 30 (3.990523587), H3-3B @ 54 (3.833825465), STAT1 @ 72 (3.759329862), H3-4 @ 88 (3.699941274)
ITGAX	3439	1.98736	SRC @ 72 (3.815262485), STAT3 @ 92 (3.744179493)	PSMC4	3106	1.96893	NRF1 @ 22 (4.046253517), RPS27A @ 35 (3.95946954), UBA52 @ 41 (3.930125003), JUN @ 42 (3.928420791), MYC @ 56 (3.825986802), TRAF6 @ 60 (3.802540496), NPM1 @ 79 (3.723229211), ESR1 @ 95 (3.677494751)
IL17A	3454	1.98402	STAT3 @ 92 (3.744179493)	IL3	3114	1.96607	EGFR @ 8 (4.259252678), RUNX1 @ 71 (3.759465655)
IFNA17	3467	1.98248	EGFR @ 18 (4.255273461)	GAB2	3115	1.96574	EGFR @ 8 (4.259252678), SRC @ 32 (3.98269232), YWHAE @ 37 (3.946570154), ERBB2 @ 53 (3.843354357), TRAF6 @ 60 (3.802540496), GRB2 @ 65 (3.770730971), AKT1 @ 82 (3.716718023), YWHAB @ 93 (3.686814642)
TAB1	3478	1.98122	EGFR @ 18 (4.255273461), GRB2 @ 21 (4.184991908), HSP90AB1 @ 47 (3.89559168), NPM1 @ 70 (3.818434018)	FSCN1	3139	1.95953	CTNNB1 @ 23 (4.032609254), YWHAE @ 37 (3.946570154), RAB35 @ 44 (3.880783612), TRAF6 @ 60 (3.802540496), GRB2 @ 65 (3.770730971), STAT3 @ 75 (3.739433125), AKT1 @ 82 (3.716718023), CDK2 @ 89 (3.699623682)
IL15	3506	1.97424	EGFR @ 18 (4.255273461), APP @ 91 (3.745785722), STAT3 @ 92 (3.744179493)	CISH	3161	1.9523	EGFR @ 8 (4.259252678), ERBB2 @ 53 (3.843354357), STAT1 @ 72 (3.759329862), STAT3 @ 75 (3.739433125)
CISH	3522	1.97066	EGFR @ 18 (4.255273461), ERBB2 @ 67 (3.830356053), STAT3 @ 92 (3.744179493)	SNRPA1	3172	1.94892	JUN @ 42 (3.928420791)
[truncated: 260 more rows]

## Sheet: Table S3.5
Table S3.5 Prioritized interleukin-1 family signaling genes and first neighbors
[truncated: 134 more rows]

[truncated: 6 more sheets: Table S3.6, Table S3.7, Table S3.8, Table S3.9, Table S3.10, Table S3.11]
