# Supplementary material for: Evidence-based genetic variants to gene mapping and prioritization uncovers distinct molecular pathophysiology and therapeutic landscape in polycystic ovary syndrome patients of different ethnicities.
Source: Research Square preprint supplement (doi:10.21203/rs.3.rs-8610143/v1), 2026-01-22
Supplement: Supplementary file 5 [file 50d96b6aa44308441715d47e.xlsx]

## Sheet: Table S7.1
Table S7.1.1 Modules of East Asian pathway crosstalk genes			Table S7.1.2 Pathway enrichment of East Asian module genes
Module	Gene		M2						M3						M4						M5						M6
M1	CAMKMT		Pathway	Pathway Size	Overlap Count	Z-score	Adjusted P-value	Odds Ratio	Pathway	Pathway Size	Overlap Count	Z-score	Adjusted P-value	Odds Ratio	Pathway	Pathway Size	Overlap Count	Z-score	Adjusted P-value	Odds Ratio	Pathway	Pathway Size	Overlap Count	Z-score	Adjusted P-value	Odds Ratio	Pathway	Pathway Size	Overlap Count	Z-score	Adjusted P-value	Odds Ratio
M2	APP		Metabolism of amino acids and derivatives	43	7	2.22	0.065	3.66	RAB GEFs exchange GTP for GDP on RABs	15	14	9.93	4.3e-14	362	GPCR ligand binding	27	25	9.89	3.5e-19	205	Cellular response to starvation	33	33	10.8	9.2e-27	Inf	ESR-mediated signaling	14	12	4.76	0.00011	18.5
	CYB5R2								Rab regulation of trafficking	15	14	9.93	4.3e-14	362	G alpha (s) signalling events	27	25	9.89	3.5e-19	205	Eukaryotic Translation Elongation	33	33	10.8	9.2e-27	Inf	Signaling by Nuclear Receptors	14	12	4.76	0.00011	18.5
	CYCS								Membrane Trafficking	24	16	8.72	6.9e-13	107	Class A/1 (Rhodopsin-like receptors)	17	16	7.69	3e-11	112	Eukaryotic Translation Initiation	33	33	10.8	9.2e-27	Inf	Intracellular signaling by second messengers	15	12	4.44	0.00026	12.2
	ETHE1								Vesicle-mediated transport	24	16	8.72	6.9e-13	107	Class B/2 (Secretin family receptors)	10	9	5.42	8.6e-06	43.8	Nonsense-Mediated Decay (NMD)	33	33	10.8	9.2e-27	Inf	Signaling by ERBB2	10	8	3.56	0.004	11
	GPHN														Signaling by GPCR	35	25	8.19	8.1e-14	40.4	Regulation of expression of SLITs and ROBOs	33	33	10.8	9.2e-27	Inf	Signaling by ERBB4	10	8	3.56	0.004	11
	HADHB														Peptide hormone metabolism	14	11	5.42	7.3e-06	19.3	Response of EIF2AK4 (GCN2) to amino acid deficiency	33	33	10.8	9.2e-27	Inf	MAPK family signaling cascades	16	12	4.14	0.0005	9.11
	MPST																				rRNA processing	33	33	10.8	9.2e-27	Inf	Cytokine Signaling in Immune system	18	13	4.16	0.0005	8.08
	PAPSS1																				SRP-dependent cotranslational protein targeting to membrane	33	33	10.8	9.2e-27	Inf	RNA Polymerase II Transcription	32	21	4.96	7.5e-05	7.58
	PAPSS2																				Translation	33	33	10.8	9.2e-27	Inf	Signaling by Receptor Tyrosine Kinases	25	17	4.54	0.00016	7.39
	SQOR																				Activation of the mRNA upon binding of the cap-binding complex and eIFs, and subsequent binding to 43S	18	18	7.52	2.3e-12	Inf	Cell Cycle, Mitotic	11	8	3.2	0.0081	7.27
	SUOX																				SARS-CoV-1 modulates host translation machinery	18	18	7.52	2.3e-12	Inf	Signaling by Rho GTPases, Miro GTPases and RHOBTB3	11	8	3.2	0.0081	7.27
	TST																				SARS-CoV-2 modulates host translation machinery	18	18	7.52	2.3e-12	Inf	Diseases of signal transduction by growth factor receptors and second messengers	22	15	4.22	0.0004	7
M3	CLTC																				Metabolism of RNA	36	34	10.6	2.2e-25	376	Adaptive Immune System	15	10	3.26	0.0068	5.67
	DENND1A																				Influenza Infection	35	33	10.4	3.5e-24	298	Cell Cycle	12	8	2.88	0.017	5.41
	DENND1B																				Selenoamino acid metabolism	35	33	10.4	3.5e-24	298	Innate Immune System	22	13	3.22	0.0068	4.33
	EEA1																				Signaling by ROBO receptors	35	33	10.4	3.5e-24	298	Hemostasis	16	9	2.41	0.045	3.48
	GAPVD1																				Cellular responses to stimuli	40	34	9.82	8.2e-22	128
	GDI1																				Metabolism of amino acids and derivatives	43	33	8.88	6.6e-18	59.2
	GDI2																				Nervous system development	44	33	8.71	2.4e-17	53.4
	MADD																				Developmental Biology	52	34	7.91	4.4e-15	39.5
	PIK3C3																				Viral Infection Pathways	48	33	8.09	2.6e-15	38
	RAB35																				Infectious disease	58	33	6.76	1.8e-11	20.6
	RAB5A																				SARS-CoV-1-host interactions	24	19	6.37	6.4e-09	19.4
	RAB5B																				SARS-CoV-1 Infection	25	19	6.14	2.2e-08	16
	RAB5C																				SARS-CoV-2-host interactions	26	19	5.91	6.3e-08	13.6
	RABGEF1																				SARS-CoV-2 Infection	26	19	5.91	6.3e-08	13.6
	RIN1																				SARS-CoV Infections	29	19	5.3	1.1e-06	9.29
	RIN2
	RIN3
	YWHAB
M4	ADCYAP1
	ADORA2A
	ADRB1
	CGA
	CGB3
	CGB5
	CGB8
	DRD1
	DRD5
	FSHB
	FSHR
	GCG
	GIP
	GIPR
	GNAS
	GNB1
	GNG2
	GPHA2
	GPHB5
	GPR119
	HTR6
	LHCGR
	MC2R
	NPPA
	NPR1
	POMC
	PTGER2
	TSHB
	TSHR
	VIP
	VIPR2
M5	CDK2
	FAU
	FLT3LG
	HABP4
	PA2G4
	PAN2
	RPL10L
	RPL11
	RPL18
	RPL19
	RPL24
	RPL28
	RPL29
	RPL30
	RPL31
	RPL34
	RPL35
	RPL35A
	RPL36
	RPL6
	RPS15
	RPS17
	RPS18
	RPS19
	RPS21
	RPS23
	RPS24
	RPS25
	RPS26
	RPS27A
	RPS28
	RPS29
	RPS3
	RPS3A
	RPS6
	RPS7
	RPS8
	UBA52
M6	CALM1
	CCT7
	CDH1
	CDK1
	CTBP1
	CTNNB1
	EGFR
	EML4
	EP300
	ERBB2
	ERBB3
	FANCC
	FOXP3
	GH1
	GRB2
	GTF2A2
	GTF2B
	HLA-B
	HSP90AB1
	IGF1R
	IKZF1
	INSR
	KIR3DL2
	KPNA2
	KRAS
	LEP
	MPO
	NRAS
	NRG1
	PRKACA
	PRL
	PTCH1
	PTPN11
	RUNX1
	SIN3A
	SMAD2
	SRC
	TBP
	THADA
	TP53
	TPH2
	YAP1
	YWHAE

## Sheet: Table S7.2
Table S7.2.1 Modules of European pathway crosstalk genes			Table S7.2.2 Pathway enrichment of European module genes
Module	Gene		M2						M3						M4						M5						M6
M1	CYB5R2		Pathway	Pathway Size	Overlap Count	Z-score	Adjusted P-value	Odds Ratio	Pathway	Pathway Size	Overlap Count	Z-score	Adjusted P-value	Odds Ratio	Pathway	Pathway Size	Overlap Count	Z-score	Adjusted P-value	Odds Ratio	Pathway	Pathway Size	Overlap Count	Z-score	Adjusted P-value	Odds Ratio	Pathway	Pathway Size	Overlap Count	Z-score	Adjusted P-value	Odds Ratio
	SUOX		Adaptive Immune System	14	5	6.99	4.1e-05	Inf	RAB GEFs exchange GTP for GDP on RABs	13	12	11.1	3.8e-15	953	GPCR ligand binding	21	20	10.3	1.6e-18	415	Cellular response to starvation	39	39	11.1	9.2e-30	Inf	SUMOylation	11	11	4.26	0.00024	Inf
M2	HLA-B		Interferon alpha/beta signaling	12	3	4.29	0.014	21	Rab regulation of trafficking	13	12	11.1	3.8e-15	953	G alpha (s) signalling events	21	20	10.3	1.6e-18	415	Eukaryotic Translation Elongation	39	39	11.1	9.2e-30	Inf	Factors involved in megakaryocyte development and platelet production	11	10	3.62	0.0017	18
	HLA-E		SARS-CoV-2 activates/modulates innate and adaptive immune responses	12	3	4.29	0.014	21	Membrane Trafficking	18	12	9.19	2.6e-12	225	Class A/1 (Rhodopsin-like receptors)	17	16	8.97	5.8e-14	197	Eukaryotic Translation Initiation	39	39	11.1	9.2e-30	Inf	Transcriptional Regulation by TP53	19	17	4.76	4.6e-05	17.7
	HLA-F		Interferon Signaling	18	3	3.3	0.037	12.3	Vesicle-mediated transport	18	12	9.19	2.6e-12	225	Signaling by GPCR	24	20	9.42	4.8e-16	107	Nonsense-Mediated Decay (NMD)	39	39	11.1	9.2e-30	Inf	DNA Repair	16	14	4.15	0.00037	13.6
	KIR3DL2		Innate Immune System	23	3	2.77	0.06	8.92							Peptide hormone metabolism	10	8	5.47	1.2e-05	27.1	Regulation of expression of SLITs and ROBOs	39	39	11.1	9.2e-30	Inf	Cell Cycle	15	13	3.93	0.00079	12.4
	KLRD1		Cytokine Signaling in Immune system	26	3	2.51	0.071	7.6													Response of EIF2AK4 (GCN2) to amino acid deficiency	39	39	11.1	9.2e-30	Inf	Intracellular signaling by second messengers	14	12	3.71	0.0015	11.2
M3	DENND1A																				rRNA processing	39	39	11.1	9.2e-30	Inf	Regulation of TP53 Activity	13	11	3.48	0.0027	10
	EEA1																				Selenoamino acid metabolism	39	39	11.1	9.2e-30	Inf	RNA Polymerase II Transcription	39	30	5.57	1.3e-06	9.35
	GAPVD1																				SRP-dependent cotranslational protein targeting to membrane	39	39	11.1	9.2e-30	Inf	Signaling by Receptor Tyrosine Kinases	17	14	3.84	0.001	8.98
	GDI1																				Translation	39	39	11.1	9.2e-30	Inf	Diseases of signal transduction by growth factor receptors and second messengers	16	13	3.61	0.0017	8.16
	GDI2																				Activation of the mRNA upon binding of the cap-binding complex and eIFs, and subsequent binding to 43S	23	23	7.96	1.2e-14	Inf	Antiviral mechanism by IFN-stimulated genes	11	9	2.98	0.011	7.88
	RAB35																				SARS-CoV-1 modulates host translation machinery	23	23	7.96	1.2e-14	Inf	Cell Cycle Checkpoints	11	9	2.98	0.011	7.88
	RAB5A																				SARS-CoV-2 modulates host translation machinery	23	23	7.96	1.2e-14	Inf	Cytokine Signaling in Immune system	26	20	4.29	0.00024	7.17
	RAB5B																				Metabolism of RNA	40	39	10.9	2.9e-28	682	Cellular Senescence	10	8	2.71	0.018	6.87
	RAB5C																				Signaling by ROBO receptors	40	39	10.9	2.9e-28	682	Cell Cycle, Mitotic	10	8	2.71	0.018	6.87
	RABGEF1																				Influenza Infection	41	39	10.7	5.3e-27	345	DDX58/IFIH1-mediated induction of interferon-alpha/beta	10	8	2.71	0.018	6.87
	RIN1																				Metabolism of amino acids and derivatives	43	39	10.3	6.7e-25	174	DNA Double-Strand Break Repair	10	8	2.71	0.018	6.87
	RIN2																				Nervous system development	44	39	10.1	5.2e-24	139	MAPK family signaling cascades	10	8	2.71	0.018	6.87
	RIN3																				Cellular responses to stimuli	55	40	8.73	1.7e-18	56	Signaling by Interleukins	13	10	2.89	0.013	5.9
M4	ADORA2A																				Developmental Biology	56	40	8.59	5.5e-18	52	Hemostasis	16	12	3.07	0.0093	5.48
	ADRB1																				Viral Infection Pathways	60	39	7.68	1.2e-14	29.5	Interferon Signaling	18	13	3.03	0.0095	4.8
	CGA																				Infectious disease	67	39	6.83	5.5e-12	20.4	Cellular response to chemical stress	11	8	2.34	0.041	4.54
	CGB3																				SARS-CoV-1-host interactions	30	24	6.69	3.6e-10	18.8	Post-translational protein modification	27	16	2.32	0.035	2.68
	CGB5																				SARS-CoV-1 Infection	30	24	6.69	3.6e-10	18.8
	DRD1																				SARS-CoV-2-host interactions	35	24	5.7	9.5e-08	9.83
	DRD5																				SARS-CoV-2 Infection	35	24	5.7	9.5e-08	9.83
	FSHB																				SARS-CoV Infections	43	24	4.39	3.8e-05	5.23
	FSHR
	GIP
	GIPR
	GNAS
	GPHA2
	GPHB5
	GPR119
	HTR6
	LHCGR
	MC2R
	NPPA
	NPR1
	POMC
	PTGER2
	TSHB
	TSHR
	VIPR2
M5	CD74
	FAU
	HABP4
	MED1
	NR0B1
	PA2G4
	QARS1
	RPL11
	RPL18
	RPL18A
	RPL19
	RPL28
	RPL29
	RPL30
	RPL31
	RPL34
	RPL35
	RPL35A
	RPL36
	RPL38
	RPL5
	RPL8
	RPS10
	RPS11
	RPS15
	RPS16
	RPS17
	RPS18
	RPS19
	RPS2
	RPS21
	RPS23
	RPS24
	RPS25
	RPS26
	RPS27A
	RPS28
	RPS29
	RPS3
	RPS3A
	RPS6
	RPS7
	RPS8
	RPS9
	UBA52
M6	AFF4
	APP
	AR
	BRCA1
	CDK1
	CDK2
	CDK9
	CHD4
	CHEK2
	COMMD7
	CTNNB1
	CYCS
	DNMT3B
	EGFR
	ELAVL1
	EP300
	ERBB3
	ERBB4
	ETHE1
	FANCC
	FGF9
	FOXP3
	GATA4
	GSDMD
	H2AX
	H3C12
	H3C13
	HDAC1
	HDAC2
	IFNA10
	IFNA21
	IFNA7
	IRF1
	ISG15
	JAK1
	JUN
	KEAP1
	KPNA2
	LIG3
	MAPRE1
	MDM2
	MESP1
	NEIL2
	NFKB1
	NPM1
	NRF1
	OGG1
	PNKP
	RAD50
	REL
	RELA
	SIN3A
	SMARCA4
	SRC
	STAT1
	STAT3
	TP53
	XRCC1
	YAP1
	YWHAE
	ZBTB16
