# Supplementary material for: Evidence-based genetic variants to gene mapping and prioritization uncovers distinct molecular pathophysiology and therapeutic landscape in polycystic ovary syndrome patients of different ethnicities.
Source: Research Square preprint supplement (doi:10.21203/rs.3.rs-8610143/v1), 2026-01-22
Supplement: Supplementary file 6 [file 7f0dc8bc863869fc5d88a106.xlsx]

## Sheet: Table S5.1
Table S5.1 Pathway enrichment of Ovary crosstalk genes
East Asian						European
Pathway	Pathway Size	Overlap Count	Z-score	Adjusted P-value	Odds Ratio	Pathway	Pathway Size	Overlap Count	Z-score	Adjusted P-value	Odds Ratio
SHC1 events in ERBB2 signaling	22	5	21.9	1.6e-08	144	Regulation of TP53 Activity through Methylation	19	5	24.2	4e-09	185
Signaling by ERBB2 in Cancer	26	5	20.1	2.2e-08	116	Downregulation of ERBB2 signaling	29	5	19.5	2.1e-08	108
Signaling by ERBB4	58	6	16	2.2e-08	58.1	DNA Double Strand Break Response	44	7	22.2	1.3e-10	104
Signaling by ERBB2	50	5	14.3	3.9e-07	54.3	Regulation of TP53 Expression and Degradation	37	5	17.2	6.9e-08	81.1
Signaling by PTK6	54	5	13.8	5.2e-07	49.8	Resolution of Abasic Sites (AP sites)	37	5	17.2	6.9e-08	81.1
Extra-nuclear estrogen signaling	75	5	11.6	2.1e-06	34.9	Signaling by ERBB4	58	7	19.2	5.2e-10	75.9
ESR-mediated signaling	161	9	14.2	3.2e-09	32.6	Signaling by ERBB2	50	6	17.8	7.4e-09	73
Transcriptional regulation by RUNX3	95	5	10.2	6.4e-06	27.1	Base Excision Repair	44	5	15.8	1.5e-07	66.6
Signaling by Nuclear Receptors	236	9	11.5	2.2e-08	21.7	TAK1-dependent IKK and NF-kappa-B activation	44	5	15.8	1.5e-07	66.6
Signaling by Receptor Tyrosine Kinases	523	12	9.93	1.6e-08	14.1	G2/M DNA damage checkpoint	60	6	16.2	1.7e-08	59.5
Intracellular signaling by second messengers	308	7	7.49	1.4e-05	11.9	Signaling by PTK6	54	5	14.2	3e-07	52.9
Diseases of signal transduction by growth factor receptors and second messengers	428	9	8.13	1.3e-06	11.7	SARS-CoV-1-host interactions	92	7	15.1	7.4e-09	45.5
MAPK family signaling cascades	321	7	7.31	1.7e-05	11.4	Cytosolic sensors of pathogen-associated DNA	62	5	13.2	5.2e-07	45.5
RHO GTPase Effectors	262	5	5.67	0.00057	9.4	Transcriptional regulation by RUNX3	95	7	14.9	8.2e-09	43.9
Signaling by GPCR	683	11	7.62	8.8e-07	9.37	DNA Double-Strand Break Repair	134	9	16.1	1.7e-10	42.5
Infectious disease	898	13	7.76	3e-07	8.93	Regulation of TP53 Activity through Phosphorylation	92	6	12.9	1.6e-07	37.3
RNA Polymerase II Transcription	1284	15	7.23	3.2e-07	7.6	G2/M Checkpoints	133	8	14.3	4e-09	36.5
Hemostasis	608	8	5.64	0.00012	6.92	The role of GTSE1 in G2/M progression after G2 checkpoint	78	5	11.7	1.4e-06	35.5
Viral Infection Pathways	705	9	5.87	5.4e-05	6.9	Transcription-Coupled Nucleotide Excision Repair (TC-NER)	78	5	11.7	1.4e-06	35.5
Transcriptional Regulation by TP53	359	5	4.61	0.0023	6.79	Regulation of TP53 Activity	159	9	14.7	5.6e-10	35.4
SARS-CoV Infections	414	5	4.17	0.0038	5.86	DDX58/IFIH1-mediated induction of interferon-alpha/beta	81	5	11.4	1.6e-06	34.1
GPCR ligand binding	450	5	3.92	0.0051	5.37	Homology Directed Repair	104	6	12.1	2.8e-07	32.7
Developmental Biology	1156	11	5.25	8.5e-05	5.34	DNA Repair	286	13	15.7	7.9e-13	32.6
Nervous system development	576	6	4.1	0.0031	5.14	Toll Like Receptor 9 (TLR9) Cascade	106	6	12	2.9e-07	32.1
Cell Cycle, Mitotic	497	5	3.63	0.0071	4.84	Regulation of PLK1 Activity at G2/M Transition	86	5	11.1	2.1e-06	32
Membrane Trafficking	624	6	3.85	0.0042	4.73	MyD88-independent TLR4 cascade	108	6	11.8	3.1e-07	31.5
Vesicle-mediated transport	671	6	3.63	0.0056	4.38	Estrogen-dependent gene expression	90	5	10.8	2.6e-06	30.5
Cytokine Signaling in Immune system	770	6	3.22	0.01	3.79	SARS-CoV-1 Infection	137	7	12.2	7e-08	29.7
Cell Cycle	628	5	2.98	0.017	3.79	Toll Like Receptor TLR1:TLR2 Cascade	115	6	11.4	4.2e-07	29.4
Signaling by Rho GTPases, Miro GTPases and RHOBTB3	649	5	2.9	0.018	3.67	p75 NTR receptor-mediated signalling	95	5	10.5	3.3e-06	28.8
Innate Immune System	1047	7	3.02	0.011	3.29	Cellular Senescence	129	6	10.8	7.4e-07	26
Cellular responses to stimuli	746	5	2.53	0.03	3.17	ESR-mediated signaling	161	7	11.2	1.8e-07	25
Adaptive Immune System	773	5	2.44	0.034	3.05	Nucleotide Excision Repair	110	5	9.69	6.3e-06	24.7
Post-translational protein modification	1348	7	2.27	0.034	2.51	Interleukin-1 signaling	114	5	9.5	7.3e-06	23.8
						Signaling by NOTCH	176	7	10.7	2.8e-07	22.8
						Transcriptional regulation by RUNX1	177	7	10.6	2.8e-07	22.7
						Transcriptional Regulation by TP53	359	12	12.7	1.7e-10	22.6
						Transcriptional regulation by RUNX2	120	5	9.24	9.1e-06	22.5
						KEAP1-NFE2L2 pathway	125	5	9.03	1.1e-05	21.6
						Cell Cycle Checkpoints	256	9	11.3	1.7e-08	21.4
						Intracellular signaling by second messengers	308	10	11.4	6.8e-09	20.4
						Mitotic G2-G2/M phases	198	7	9.99	5e-07	20.1
						Toll-like Receptor Cascades	165	6	9.39	2.6e-06	20.1
						PTEN Regulation	139	5	8.51	1.8e-05	19.3
						C-type lectin receptors (CLRs)	140	5	8.48	1.8e-05	19.2
						Antiviral mechanism by IFN-stimulated genes	148	5	8.22	2.3e-05	18.1
						Interleukin-1 family signaling	151	5	8.12	2.5e-05	17.7
						Death Receptor Signaling	152	5	8.09	2.5e-05	17.6
						Signaling by Nuclear Receptors	236	7	9.04	1.4e-06	16.8
						Programmed Cell Death	203	6	8.35	7.3e-06	16.2
						RNA Polymerase II Transcription	1284	21	11.2	7.9e-13	16
						Apoptosis	171	5	7.57	4.2e-05	15.6
						TCF dependent signaling in response to WNT	172	5	7.54	4.3e-05	15.5
						MAPK family signaling cascades	321	8	8.75	8.1e-07	14.4
						Deubiquitination	243	6	7.52	1.8e-05	13.4
						SARS-CoV-2-host interactions	198	5	6.95	8e-05	13.4
						Diseases of signal transduction by growth factor receptors and second messengers	428	9	8.4	6e-07	12.5
						Cellular response to chemical stress	211	5	6.69	0.00011	12.5
						Interferon Signaling	267	6	7.11	2.9e-05	12.2
						Signaling by Receptor Tyrosine Kinases	523	10	8.37	3.2e-07	11.7
						SARS-CoV Infections	414	8	7.51	4.3e-06	11.1
						Cell Cycle	628	11	8.32	2.1e-07	11
						Infectious disease	898	14	8.78	1.6e-08	10.9
						Signaling by WNT	268	5	5.78	0.00032	9.76
						Cell Cycle, Mitotic	497	8	6.69	1.4e-05	9.14
						SARS-CoV-2 Infection	291	5	5.49	0.00045	8.96
						Cytokine Signaling in Immune system	770	11	7.3	1e-06	8.88
						Viral Infection Pathways	705	10	6.92	3.3e-06	8.53
						Signaling by Interleukins	459	7	6.03	6.5e-05	8.39
						Developmental Biology	1156	14	7.43	2.1e-07	8.29
						Cellular responses to stimuli	746	10	6.66	5.2e-06	8.03
						Nervous system development	576	8	6.07	3.6e-05	7.84
						M Phase	353	5	4.83	0.001	7.34
						Membrane Trafficking	624	7	4.88	0.00041	6.08
						Vesicle-mediated transport	671	7	4.63	0.0006	5.63
						Innate Immune System	1047	10	5.22	7.4e-05	5.59
						Hemostasis	608	6	4.1	0.002	5.18
						Post-translational protein modification	1348	10	4.25	0.00054	4.25
						Adaptive Immune System	773	5	2.58	0.027	3.24

## Sheet: Table S5.2
Table S5.2 Pathway enrichment of Adipose crosstalk genes
East Asian						European
Pathway	Pathway Size	Overlap Count	Z-score	Adjusted P-value	Odds Ratio	Pathway	Pathway Size	Overlap Count	Z-score	Adjusted P-value	Odds Ratio
Hormone ligand-binding receptors	12	8	50.4	1.3e-18	1250	Regulation of TP53 Activity through Methylation	19	5	23.3	3.3e-09	169
Peptide hormone biosynthesis	14	6	35	1.3e-12	428	Inactivation of CSF3 (G-CSF) signaling	25	5	20.3	1.1e-08	119
Degradation of cysteine and homocysteine	15	5	28.1	3.7e-10	276	Regulation of IFNA/IFNB signaling	26	5	19.9	1.3e-08	113
Sulfur amino acid metabolism	28	5	20.5	5.3e-09	120	Regulation of TP53 Activity through Acetylation	29	5	18.8	2e-08	99.1
Peptide hormone metabolism	88	7	15.9	1.8e-09	51.2	Signaling by CSF3 (G-CSF)	30	5	18.4	2.4e-08	95
G alpha (s) signalling events	149	10	17.5	2e-12	47.6	Regulation of TP53 Expression and Degradation	37	6	19.9	1.5e-09	94.6
RAB GEFs exchange GTP for GDP on RABs	88	5	11.3	1.6e-06	33.3	Senescence-Associated Secretory Phenotype (SASP)	52	7	19.6	2.3e-10	78.3
Rab regulation of trafficking	120	5	9.53	6.7e-06	24	DDX58/IFIH1-mediated induction of interferon-alpha/beta	81	10	22.4	7.5e-14	78
Class A/1 (Rhodopsin-like receptors)	320	10	11.5	1.9e-09	21.2	TAK1-dependent IKK and NF-kappa-B activation	44	6	18.2	3.8e-09	77.1
Metabolism of amino acids and derivatives	356	10	10.9	4e-09	18.9	SARS-CoV-1 activates/modulates innate immune responses	38	5	16.3	7.6e-08	71.9
GPCR ligand binding	450	11	10.5	2.7e-09	17	Interferon alpha/beta signaling	77	9	20.6	1.7e-12	70.8
Signaling by GPCR	683	12	9.04	1.2e-08	12.5	Signaling by PTK6	54	6	16.4	1.1e-08	61.1
Membrane Trafficking	624	8	5.98	4.5e-05	7.74	DNA Double Strand Break Response	44	5	15.1	1.4e-07	60.9
Vesicle-mediated transport	671	8	5.69	7e-05	7.17	Regulated Necrosis	58	6	15.8	1.5e-08	56.4
Viral Infection Pathways	705	7	4.66	0.00055	5.73	NOTCH1 Intracellular Domain Regulates Transcription	48	5	14.5	2e-07	55.2
Infectious disease	898	8	4.6	0.00045	5.26	Signaling by NOTCH3	49	5	14.3	2.1e-07	54
RNA Polymerase II Transcription	1284	10	4.65	0.00024	4.84	Transcriptional activity of SMAD2/SMAD3:SMAD4 heterotrimer	51	5	14	2.6e-07	51.6
						Nucleotide-binding domain, leucine rich repeat containing receptor (NLR) signaling pathways	56	5	13.3	4e-07	46.5
						Cellular Senescence	129	10	17.5	4e-12	46.4
						Signaling by NOTCH1 PEST Domain Mutants in Cancer	58	5	13.1	4.7e-07	44.7
						ISG15 antiviral mechanism	72	6	14.1	4.8e-08	44.4
						Regulation of PTEN gene transcription	61	5	12.8	5.6e-07	42.4
						Regulation of TP53 Activity	159	11	17.3	1.1e-12	42.3
						SARS-CoV-2 activates/modulates innate and adaptive immune responses	123	9	16.1	8.8e-11	42.2
						Cytosolic sensors of pathogen-associated DNA	62	5	12.6	6e-07	41.6
						SARS-CoV-1-host interactions	92	7	14.5	8.1e-09	41.4
						Oxidative Stress Induced Senescence	64	5	12.4	7e-07	40.2
						G1/S DNA Damage Checkpoints	67	5	12.1	8.2e-07	38.3
						Toll Like Receptor 9 (TLR9) Cascade	106	7	13.5	1.7e-08	35.5
						MyD88-independent TLR4 cascade	108	7	13.3	1.8e-08	34.8
						Antiviral mechanism by IFN-stimulated genes	148	9	14.6	3.8e-10	34.5
						Signaling by NOTCH1	74	5	11.5	1.3e-06	34.4
						Regulation of TP53 Activity through Phosphorylation	92	6	12.4	1.7e-07	34
						PKR-mediated signaling	75	5	11.4	1.4e-06	33.9
						p75 NTR receptor-mediated signalling	95	6	12.2	2e-07	32.9
						Toll Like Receptor TLR1:TLR2 Cascade	115	7	12.9	2.6e-08	32.5
						Nuclear events mediated by NFE2L2	96	6	12.1	2.1e-07	32.5
						Downstream signaling events of B Cell Receptor (BCR)	81	5	11	2e-06	31.2
						Interferon Signaling	267	13	15.6	4.4e-13	31.1
						SARS-CoV Infections	414	17	16.3	1.9e-15	30.3
						SARS-CoV-2-host interactions	198	10	14	2.1e-10	29.2
						Interleukin-1 family signaling	151	8	12.8	8.8e-09	28.9
						Signaling by NOTCH	176	9	13.3	1.5e-09	28.7
						Factors involved in megakaryocyte development and platelet production	154	8	12.7	9.9e-09	28.3
						Interleukin-1 signaling	114	6	11	5.1e-07	27.1
						SARS-CoV-1 Infection	137	7	11.7	7.9e-08	27
						PTEN Regulation	139	7	11.6	8.5e-08	26.6
						Signaling by TGF-beta Receptor Complex	94	5	10.1	3.9e-06	26.6
						Toll-like Receptor Cascades	165	8	12.2	1.5e-08	26.3
						Transcriptional regulation by RUNX3	95	5	10.1	4e-06	26.3
						KEAP1-NFE2L2 pathway	125	6	10.5	7.7e-07	24.6
						Potential therapeutics for SARS	106	5	9.47	6.6e-06	23.4
						G2/M Checkpoints	133	6	10.1	1.1e-06	23
						DNA Double-Strand Break Repair	134	6	10.1	1.1e-06	22.8
						Transcriptional Regulation by TP53	359	13	13.3	1.2e-11	22.7
						SUMOylation	173	7	10.3	3e-07	21.1
						Signaling by the B Cell Receptor (BCR)	118	5	8.93	1.1e-05	21
						Intracellular signaling by second messengers	308	11	12.1	5.8e-10	20.9
						Transcriptional regulation by RUNX2	120	5	8.84	1.2e-05	20.6
						Cellular response to chemical stress	211	8	10.6	7.8e-08	20.3
						Death Receptor Signaling	152	6	9.41	2.2e-06	20
						Infectious disease	898	21	13.2	4.2e-15	19.9
						Signaling by TGFB family members	124	5	8.68	1.3e-05	19.9
						SARS-CoV-2 Infection	291	10	11.3	5.1e-09	19.5
						Cytokine Signaling in Immune system	770	19	13	5.6e-14	19.2
						Viral Infection Pathways	705	18	12.9	1.3e-13	19.1
						Ub-specific processing proteases	165	6	8.98	3.4e-06	18.3
						Programmed Cell Death	203	7	9.42	7.6e-07	17.9
						Fc epsilon receptor (FCERI) signaling	137	5	8.21	2.1e-05	17.9
						Chromatin modifying enzymes	204	7	9.4	7.7e-07	17.8
						Apoptosis	171	6	8.8	4e-06	17.7
						Deubiquitination	243	8	9.82	2e-07	17.5
						C-type lectin receptors (CLRs)	140	5	8.11	2.3e-05	17.5
						Transcriptional regulation by RUNX1	177	6	8.63	4.8e-06	17
						Mitotic G1 phase and G1/S transition	149	5	7.83	3e-05	16.4
						Influenza Infection	154	5	7.68	3.5e-05	15.9
						Signaling by Interleukins	459	12	10.6	2.2e-09	15.6
						Mitotic G2-G2/M phases	198	6	8.09	8.9e-06	15.2
						ESR-mediated signaling	161	5	7.49	4.3e-05	15.1
						DNA Repair	286	8	8.94	5.6e-07	14.8
						Leishmania infection	171	5	7.23	5.7e-05	14.2
						TCF dependent signaling in response to WNT	172	5	7.2	5.8e-05	14.1
						Cell Cycle Checkpoints	256	7	8.24	3.1e-06	14
						Cellular responses to stimuli	746	15	10.1	4.2e-10	13.1
						Diseases of signal transduction by growth factor receptors and second messengers	428	10	9	1.1e-07	13
						RNA Polymerase II Transcription	1284	20	10.1	1.2e-11	12.2
						MAPK family signaling cascades	321	7	7.2	1.2e-05	11.1
						Signaling by Receptor Tyrosine Kinases	523	10	7.96	5.3e-07	10.5
						Signaling by Nuclear Receptors	236	5	5.96	0.00025	10.2
						Signaling by WNT	268	5	5.5	0.00044	8.93
						Innate Immune System	1047	14	7.52	1.5e-07	8.16
						Hemostasis	608	9	6.39	1.2e-05	7.8
						Cell Cycle	628	9	6.25	1.6e-05	7.54
						Cell Cycle, Mitotic	497	7	5.42	0.00017	7.02
						Metabolism of amino acids and derivatives	356	5	4.55	0.0016	6.65
						Developmental Biology	1156	13	6.39	2.2e-06	6.55
						Post-translational protein modification	1348	13	5.69	1.1e-05	5.54
						Nervous system development	576	6	4.02	0.0024	4.99
						Membrane Trafficking	624	5	2.93	0.016	3.71
						Adaptive Immune System	773	6	3.13	0.0097	3.67
						Vesicle-mediated transport	671	5	2.74	0.021	3.44

## Sheet: Table S5.3
Table S5.3 Pathway enrichment of Liver crosstalk genes
East Asian						European
Pathway	Pathway Size	Overlap Count	Z-score	Adjusted P-value	Odds Ratio	Pathway	Pathway Size	Overlap Count	Z-score	Adjusted P-value	Odds Ratio
Spry regulation of FGF signaling	16	5	25.1	1e-09	208	SARS-CoV-1 modulates host translation machinery	35	22	67.2	1.3e-48	985
Listeria monocytogenes entry into host cells	20	6	26.9	2.1e-11	202	Eukaryotic Translation Elongation	92	34	64	1e-65	570
SARS-CoV-1 modulates host translation machinery	35	9	30.5	1.7e-15	179	Response of EIF2AK4 (GCN2) to amino acid deficiency	100	34	61.3	1.6e-64	494
SARS-CoV-2 modulates host translation machinery	49	9	25.7	2.1e-14	116	SARS-CoV-2 modulates host translation machinery	49	22	56.7	3.2e-44	463
Negative regulation of FGFR3 signaling	29	5	18.5	2e-08	96.2	Selenoamino acid metabolism	107	34	59.3	1.7e-63	453
Activation of the mRNA upon binding of the cap-binding complex and eIFs, and subsequent binding to 43S	58	9	23.6	9.7e-14	95.1	SRP-dependent cotranslational protein targeting to membrane	111	34	58.2	5.7e-63	428
Negative regulation of FGFR4 signaling	31	5	17.9	2.7e-08	88.8	Nonsense-Mediated Decay (NMD)	114	34	57.4	1.3e-62	412
Signaling by CSF1 (M-CSF) in myeloid cells	31	5	17.9	2.7e-08	88.8	Eukaryotic Translation Initiation	118	34	56.4	4.4e-62	392
SARS-CoV-1-host interactions	92	12	24.9	2.2e-16	85.6	Activation of the mRNA upon binding of the cap-binding complex and eIFs, and subsequent binding to 43S	58	22	52.1	3.2e-42	345
Negative regulation of FGFR1 signaling	33	5	17.3	3.6e-08	82.4	Cellular response to starvation	154	34	49.3	1e-57	274
Negative regulation of FGFR2 signaling	34	5	17.1	4.1e-08	79.4	Influenza Infection	154	34	49.3	1e-57	274
Selenoamino acid metabolism	107	12	23	4.9e-16	72.1	SARS-CoV-1-host interactions	92	26	48.8	2.9e-46	261
Signaling by FGFR3	40	5	15.7	9.2e-08	65.9	Regulation of expression of SLITs and ROBOs	170	34	46.8	3.9e-56	241
Eukaryotic Translation Elongation	92	10	20.7	1.1e-13	65.2	rRNA processing	198	34	43.3	1e-53	201
Signaling by EGFR	50	6	16.8	6.2e-09	64.7	Signaling by ROBO receptors	216	34	41.4	2.3e-52	181
Signaling by ERBB2	50	6	16.8	6.2e-09	64.7	SARS-CoV-1 Infection	137	26	39.8	2.5e-41	155
Signaling by FGFR4	41	5	15.5	1e-07	64.1	Translation	272	34	36.8	9.2e-49	138
Response of EIF2AK4 (GCN2) to amino acid deficiency	100	10	19.8	2.4e-13	59.4	Metabolism of amino acids and derivatives	356	35	33	1.1e-46	111
SARS-CoV-1 Infection	137	12	20.2	5.3e-15	54.8	SARS-CoV-2-host interactions	198	26	32.9	6.5e-37	99.6
Signaling by ERBB4	58	6	15.6	1.4e-08	54.8	Viral Infection Pathways	705	40	26.4	3.3e-45	87.5
Bacterial Infection Pathways	70	7	16.5	1.1e-09	54.2	Infectious disease	898	41	23.8	7.7e-43	75.5
Interleukin-3, Interleukin-5 and GM-CSF signaling	48	5	14.3	2.2e-07	53.7	Cellular responses to stimuli	746	38	24.3	1.3e-40	65.8
SRP-dependent cotranslational protein targeting to membrane	111	10	18.7	6.1e-13	53	SARS-CoV-2 Infection	291	26	26.9	1.9e-32	64.3
Nonsense-Mediated Decay (NMD)	114	10	18.5	7e-13	51.4	Nervous system development	576	34	24.8	1.4e-37	59.4
Eukaryotic Translation Initiation	118	10	18.2	8.9e-13	49.5	SARS-CoV Infections	414	29	25	1.9e-33	55.8
Signaling by FGFR1	52	5	13.7	3.2e-07	49.1	Metabolism of RNA	703	34	22.3	1.2e-34	47.9
Signaling by PTK6	54	5	13.4	3.8e-07	47.1	TAK1-dependent IKK and NF-kappa-B activation	44	5	13.3	4e-07	46.3
SARS-CoV-2-host interactions	198	13	18.1	9.5e-15	41.4	Developmental Biology	1156	38	19.1	1.9e-33	40.7
Transcriptional regulation by RUNX3	95	7	14.1	7.8e-09	38.8	Nucleotide-binding domain, leucine rich repeat containing receptor (NLR) signaling pathways	56	5	11.7	1.3e-06	35.4
Cellular response to starvation	154	10	15.8	1.1e-11	37	Cytosolic sensors of pathogen-associated DNA	62	5	11.1	2.1e-06	31.7
Influenza Infection	154	10	15.8	1.1e-11	37	DDX58/IFIH1-mediated induction of interferon-alpha/beta	81	6	11.6	3.1e-07	29.5
Signaling by FGFR2	72	5	11.5	1.5e-06	34.4	Interferon alpha/beta signaling	77	5	9.88	6.1e-06	25.1
Signaling by ROBO receptors	216	12	15.9	5.6e-13	33.4	Nuclear events mediated by NFE2L2	96	5	8.74	1.7e-05	19.8
Regulation of expression of SLITs and ROBOs	170	10	14.9	2.8e-11	33.3	Antigen processing-Cross presentation	105	5	8.31	2.6e-05	18
Constitutive Signaling by Aberrant PI3K in Cancer	78	5	11	2.2e-06	31.6	Toll Like Receptor 9 (TLR9) Cascade	106	5	8.27	2.7e-05	17.8
Signaling by MET	79	5	11	2.3e-06	31.2	MyD88-independent TLR4 cascade	108	5	8.18	2.8e-05	17.5
DDX58/IFIH1-mediated induction of interferon-alpha/beta	81	5	10.8	2.5e-06	30.3	Interleukin-1 signaling	114	5	7.93	3.6e-05	16.5
rRNA processing	198	10	13.8	1.2e-10	28.3	Toll Like Receptor TLR1:TLR2 Cascade	115	5	7.89	3.6e-05	16.4
Signaling by FGFR	88	5	10.3	3.7e-06	27.8	SARS-CoV-2 activates/modulates innate and adaptive immune responses	123	5	7.6	4.9e-05	15.3
Metabolism of amino acids and derivatives	356	15	15.3	2.1e-14	27.7	KEAP1-NFE2L2 pathway	125	5	7.53	5.2e-05	15
SARS-CoV-2 Infection	291	13	14.7	6.4e-13	27.4	Immunoregulatory interactions between a Lymphoid and a non-Lymphoid cell	139	5	7.07	8.2e-05	13.4
Negative regulation of the PI3K/AKT network	113	6	10.9	5.8e-07	26.5	C-type lectin receptors (CLRs)	140	5	7.04	8.2e-05	13.3
SARS-CoV Infections	414	16	15.1	9.5e-15	26.2	Interleukin-1 family signaling	151	5	6.73	0.00011	12.3
PI3K/AKT Signaling in Cancer	105	5	9.39	8.2e-06	23	Toll-like Receptor Cascades	165	5	6.38	0.00017	11.2
MyD88-independent TLR4 cascade	108	5	9.25	9.2e-06	22.4	Cellular response to chemical stress	211	6	6.73	5.5e-05	10.7
Infectious disease	898	22	13.7	3.6e-16	20.9	Interferon Signaling	267	5	4.69	0.0014	6.81
Translation	272	10	11.5	2.5e-09	20.2	Adaptive Immune System	773	10	5.11	0.00011	5.09
SARS-CoV-2 activates/modulates innate and adaptive immune responses	123	5	8.6	1.7e-05	19.5	Class I MHC mediated antigen processing & presentation	379	5	3.63	0.0063	4.74
Nervous system development	576	16	12.5	7.2e-13	18.4	Diseases of signal transduction by growth factor receptors and second messengers	428	5	3.28	0.0099	4.18
Mitotic G2-G2/M phases	198	7	9.42	8.6e-07	17.8	Cytokine Signaling in Immune system	770	8	3.79	0.0023	3.89
Intracellular signaling by second messengers	308	10	10.8	7.2e-09	17.7	Signaling by Interleukins	459	5	3.09	0.013	3.89
Developmental Biology	1156	23	12.4	1.7e-15	17.5	Innate Immune System	1047	10	3.94	0.0012	3.68
C-type lectin receptors (CLRs)	140	5	8	3.2e-05	17	Post-translational protein modification	1348	10	3.04	0.0071	2.8
Signaling by NOTCH	176	6	8.54	6.4e-06	16.7	RNA Polymerase II Transcription	1284	8	2.15	0.039	2.25
Transcriptional regulation by RUNX1	177	6	8.51	6.5e-06	16.6
Viral Infection Pathways	705	17	11.9	8.9e-13	16.5
G alpha (s) signalling events	149	5	7.72	4.1e-05	16
Cell-Cell communication	150	5	7.69	4.2e-05	15.8
Interleukin-1 family signaling	151	5	7.66	4.3e-05	15.7
Regulation of TP53 Activity	159	5	7.43	5.4e-05	14.9
ESR-mediated signaling	161	5	7.38	5.6e-05	14.7
Toll-like Receptor Cascades	165	5	7.28	6.3e-05	14.4
Apoptosis	171	5	7.13	7.2e-05	13.8
Leishmania infection	171	5	7.13	7.2e-05	13.8
MAPK family signaling cascades	321	8	8.23	1.6e-06	12.7
Diseases of signal transduction by growth factor receptors and second messengers	428	10	8.87	1.2e-07	12.6
Signaling by Receptor Tyrosine Kinases	523	11	8.74	7.5e-08	11.6
Programmed Cell Death	203	5	6.43	0.00015	11.6
Cellular responses to stimuli	746	14	9.23	3.8e-09	11.3
Signaling by Nuclear Receptors	236	5	5.87	0.0003	9.9
Interferon Signaling	267	5	5.43	0.00052	8.71
DNA Repair	286	5	5.19	0.00069	8.11
Metabolism of carbohydrates	287	5	5.18	0.00069	8.09
Cell Cycle, Mitotic	497	8	6.25	3.2e-05	8.04
Cytokine Signaling in Immune system	770	11	6.8	2.6e-06	7.7
Metabolism of RNA	703	10	6.45	8.2e-06	7.45
Signaling by Interleukins	459	7	5.63	0.00013	7.4
Innate Immune System	1047	13	6.74	1.3e-06	7.03
Transcriptional Regulation by TP53	359	5	4.45	0.0019	6.41
Cell Cycle	628	8	5.32	0.00014	6.29
Adaptive Immune System	773	9	5.3	0.0001	5.87
Signaling by GPCR	683	8	5	0.00024	5.76
Hemostasis	608	7	4.61	0.00068	5.52
Membrane Trafficking	624	6	3.69	0.0041	4.46
RNA Polymerase II Transcription	1284	11	4.62	0.00022	4.44
Signaling by Rho GTPases, Miro GTPases and RHOBTB3	649	6	3.57	0.0048	4.28
Vesicle-mediated transport	671	6	3.47	0.0056	4.13
Transport of small molecules	682	5	2.63	0.025	3.29

## Sheet: Table S5.4
Table S5.4 Pathway enrichment of Muscle crosstalk genes
East Asian						European
Pathway	Pathway Size	Overlap Count	Z-score	Adjusted P-value	Odds Ratio	Pathway	Pathway Size	Overlap Count	Z-score	Adjusted P-value	Odds Ratio
Degradation of cysteine and homocysteine	15	5	27.7	3.5e-10	268	RAB GEFs exchange GTP for GDP on RABs	88	13	26.1	3.9e-18	87
RAB GEFs exchange GTP for GDP on RABs	88	15	34.2	1.6e-24	162	Regulation of TP53 Expression and Degradation	37	5	15.4	3.1e-07	63.3
Sulfur amino acid metabolism	28	5	20.2	9.2e-09	116	Rab regulation of trafficking	120	13	22.2	1.3e-16	60.9
Rab regulation of trafficking	120	15	29.2	1.1e-22	113	TBC/RABGAPs	44	5	14.1	6e-07	51.9
TBC/RABGAPs	44	5	16	8.5e-08	68.8	Signaling by PTK6	54	5	12.6	1.4e-06	41.4
Membrane Trafficking	624	18	14.7	4.2e-16	26.5	G2/M DNA damage checkpoint	60	5	11.9	1.8e-06	36.8
Vesicle-mediated transport	671	18	14.1	1.1e-15	24.6	PKR-mediated signaling	75	5	10.6	4.5e-06	28.9
Clathrin-mediated endocytosis	145	6	10.2	1.3e-06	23.8	Regulation of TP53 Activity through Phosphorylation	92	5	9.48	1.1e-05	23.2
Metabolism of amino acids and derivatives	356	6	6.05	0.00017	9.34	Regulation of TP53 Activity	159	8	11.5	7.3e-08	23
Signaling by Receptor Tyrosine Kinases	523	8	6.59	2.3e-05	8.98	Transcriptional regulation by RUNX3	95	5	9.32	1.2e-05	22.5
Diseases of signal transduction by growth factor receptors and second messengers	428	6	5.37	0.00042	7.72	PI3K/AKT Signaling in Cancer	105	5	8.81	1.7e-05	20.2
Viral Infection Pathways	705	5	2.89	0.022	3.69	G2/M Checkpoints	133	6	9.37	4.3e-06	19.6
Infectious disease	898	6	3.01	0.016	3.55	DNA Double-Strand Break Repair	134	6	9.33	4.3e-06	19.4
RNA Polymerase II Transcription	1284	7	2.66	0.022	2.92	SUMOylation	173	7	9.53	1.5e-06	17.9
						Factors involved in megakaryocyte development and platelet production	154	6	8.63	8.7e-06	16.8
						Cellular Senescence	129	5	7.84	4e-05	16.3
						Transcriptional Regulation by TP53	359	11	10.2	2.1e-08	14.8
						DNA Repair	286	9	9.36	3.7e-07	14.4
						Clathrin-mediated endocytosis	145	5	7.33	6.6e-05	14.4
						Antiviral mechanism by IFN-stimulated genes	148	5	7.25	7.1e-05	14.1
						Cell Cycle Checkpoints	256	8	8.78	1.5e-06	14
						Mitotic G2-G2/M phases	198	6	7.45	2.7e-05	12.9
						Programmed Cell Death	203	6	7.34	3.1e-05	12.6
						Deubiquitination	243	7	7.82	9e-06	12.5
						Cellular response to chemical stress	211	6	7.17	3.6e-05	12.1
						Apoptosis	171	5	6.65	0.00013	12.1
						Signaling by NOTCH	176	5	6.54	0.00015	11.8
						Membrane Trafficking	624	14	9.58	8.2e-09	11.5
						Diseases of signal transduction by growth factor receptors and second messengers	428	10	8.26	8.4e-07	10.8
						Vesicle-mediated transport	671	14	9.15	1.7e-08	10.7
						Intracellular signaling by second messengers	308	7	6.76	3.1e-05	9.77
						Interferon Signaling	267	6	6.21	0.00011	9.44
						Signaling by Receptor Tyrosine Kinases	523	10	7.27	3.4e-06	8.76
						RNA Polymerase II Transcription	1284	19	8.59	5.1e-09	8.58
						Cellular responses to stimuli	746	12	7.12	1.7e-06	7.68
						SARS-CoV Infections	414	7	5.57	0.00015	7.18
						Cell Cycle	628	9	5.65	6.4e-05	6.32
						MAPK family signaling cascades	321	5	4.43	0.002	6.32
						Developmental Biology	1156	13	5.72	1.7e-05	5.36
						Post-translational protein modification	1348	14	5.59	1.7e-05	5.04
						Infectious disease	898	10	4.94	0.00016	4.95
						Cell Cycle, Mitotic	497	6	4.03	0.0025	4.95
						Viral Infection Pathways	705	8	4.46	0.0007	4.83
						Cytokine Signaling in Immune system	770	8	4.15	0.0012	4.4
						Signaling by Interleukins	459	5	3.38	0.0084	4.36
						Hemostasis	608	6	3.42	0.0065	4.01
						Nervous system development	576	5	2.77	0.02	3.44
						Innate Immune System	1047	8	3.12	0.0074	3.17

## Sheet: Table S5.5
Table S5.5 Pathway enrichment of Pancreas crosstalk genes
East Asian						European
Pathway	Pathway Size	Overlap Count	Z-score	Adjusted P-value	Odds Ratio	Pathway	Pathway Size	Overlap Count	Z-score	Adjusted P-value	Odds Ratio
Degradation of cysteine and homocysteine	15	5	26.6	2.9e-10	242	STAT3 nuclear events downstream of ALK signaling	10	5	32.7	1.2e-10	488
SARS-CoV-1 modulates host translation machinery	35	8	27.8	2.6e-14	158	Regulation of TP53 Activity through Methylation	19	5	23.6	2.3e-09	173
Selenoamino acid metabolism	107	16	31.7	3.5e-24	126	Signaling by ALK	27	5	19.7	1.2e-08	111
Eukaryotic Translation Elongation	92	14	29.9	1.6e-21	119	SARS-CoV-1 modulates host translation machinery	35	6	20.8	7.8e-10	104
Response of EIF2AK4 (GCN2) to amino acid deficiency	100	14	28.6	4.1e-21	108	Regulation of TP53 Activity through Acetylation	29	5	19	1.6e-08	102
Sulfur amino acid metabolism	28	5	19.4	7.9e-09	106	SARS-CoV-1-host interactions	92	11	23.4	3.6e-15	80.5
SARS-CoV-2 modulates host translation machinery	49	8	23.4	4.3e-13	105	SARS-CoV-2 modulates host translation machinery	49	6	17.5	4.9e-09	70.3
Downregulation of ERBB2 signaling	29	5	19	9.2e-09	102	TAK1-dependent IKK and NF-kappa-B activation	44	5	15.3	1.2e-07	62.6
SRP-dependent cotranslational protein targeting to membrane	111	14	27.1	1.5e-20	95.5	Activation of the mRNA upon binding of the cap-binding complex and eIFs, and subsequent binding to 43S	58	6	16	1.2e-08	58.1
Nonsense-Mediated Decay (NMD)	114	14	26.8	1.9e-20	92.5	NOTCH1 Intracellular Domain Regulates Transcription	48	5	14.7	1.7e-07	56.8
Eukaryotic Translation Initiation	118	14	26.3	2.7e-20	89.3	Signaling by NOTCH3	49	5	14.5	1.8e-07	55.5
Activation of the mRNA upon binding of the cap-binding complex and eIFs, and subsequent binding to 43S	58	8	21.5	1.6e-12	85.4	Transcriptional activity of SMAD2/SMAD3:SMAD4 heterotrimer	51	5	14.2	2.2e-07	53.1
Cellular response to starvation	154	14	22.9	1e-18	66.1	Senescence-Associated Secretory Phenotype (SASP)	52	5	14.1	2.4e-07	51.9
Influenza Infection	154	14	22.9	1e-18	66.1	SARS-CoV-1 Infection	137	11	19	2e-13	51.5
Signaling by PTK6	54	6	16.6	4.2e-09	62.9	Eukaryotic Translation Elongation	92	8	16.9	2.7e-10	50.9
Regulation of expression of SLITs and ROBOs	170	14	21.8	3.8e-18	59.2	Signaling by PTK6	54	5	13.8	2.7e-07	49.8
Metabolism of amino acids and derivatives	356	21	22.4	4e-24	56.9	DDX58/IFIH1-mediated induction of interferon-alpha/beta	81	7	15.7	2.4e-09	49
Signaling by ERBB2	50	5	14.3	1.5e-07	54.3	Response of EIF2AK4 (GCN2) to amino acid deficiency	100	8	16.2	4.5e-10	46.6
SARS-CoV-1-host interactions	92	8	16.9	6.7e-11	50.9	Regulated Necrosis	58	5	13.3	3.6e-07	46.1
rRNA processing	198	14	20.1	3e-17	50.2	Signaling by ERBB4	58	5	13.3	3.6e-07	46.1
Signaling by ERBB4	58	5	13.3	3e-07	46.1	Signaling by NOTCH1 PEST Domain Mutants in Cancer	58	5	13.3	3.6e-07	46.1
Signaling by ROBO receptors	216	14	19.2	9.5e-17	45.7	Regulation of PTEN gene transcription	61	5	12.9	4.5e-07	43.6
Translation	272	14	16.9	2.2e-15	35.6	Selenoamino acid metabolism	107	8	15.6	6.1e-10	43.2
Constitutive Signaling by Aberrant PI3K in Cancer	78	5	11.3	1.2e-06	33.4	Cytosolic sensors of pathogen-associated DNA	62	5	12.8	4.8e-07	42.9
SARS-CoV-1 Infection	137	8	13.7	1.4e-09	33.1	Interferon alpha/beta signaling	77	6	13.8	5.3e-08	42.5
Negative regulation of the PI3K/AKT network	113	6	11.2	3e-07	28.2	SRP-dependent cotranslational protein targeting to membrane	111	8	15.3	7.4e-10	41.5
PI3K/AKT Signaling in Cancer	105	5	9.66	5e-06	24.4	Oxidative Stress Induced Senescence	64	5	12.6	5.5e-07	41.4
SARS-CoV-2-host interactions	198	8	11.2	2.2e-08	22.4	Transcriptional regulation by RUNX3	95	7	14.5	6.6e-09	41.2
Nervous system development	576	17	13.8	8.2e-15	22.3	Nonsense-Mediated Decay (NMD)	114	8	15.1	8.4e-10	40.3
Cellular responses to stimuli	746	17	11.9	4.4e-13	16.9	Influenza Infection	154	10	16.2	1.6e-11	39.6
SARS-CoV-2 Infection	291	8	8.98	3.8e-07	15	Eukaryotic Translation Initiation	118	8	14.8	1e-09	38.8
Viral Infection Pathways	705	15	10.7	4.2e-11	14.5	ISG15 antiviral mechanism	72	5	11.8	9.4e-07	36.4
Developmental Biology	1156	20	10.9	2.7e-13	14.4	Signaling by NOTCH1	74	5	11.7	1.1e-06	35.4
Intracellular signaling by second messengers	308	8	8.69	5.7e-07	14.1	PKR-mediated signaling	75	5	11.6	1.1e-06	34.9
Metabolism of RNA	703	14	9.88	4.8e-10	13	SARS-CoV-2-host interactions	198	11	15.6	7.5e-12	34.6
Infectious disease	898	16	9.89	9.5e-11	12.5	SARS-CoV Infections	414	17	16.6	5.4e-16	31.7
MAPK family signaling cascades	321	7	7.31	9.2e-06	11.4	Antiviral mechanism by IFN-stimulated genes	148	8	13.1	5.1e-09	30.5
SARS-CoV Infections	414	8	7.26	4.9e-06	10.4	Toll Like Receptor 9 (TLR9) Cascade	106	6	11.6	2.7e-07	30.1
Diseases of signal transduction by growth factor receptors and second messengers	428	7	6.1	5.5e-05	8.46	Cellular Senescence	129	7	12.3	4.1e-08	29.7
Signaling by Receptor Tyrosine Kinases	523	8	6.25	2.5e-05	8.11	Signaling by NOTCH	176	9	13.5	8.9e-10	29.6
Transcriptional Regulation by TP53	359	5	4.61	0.0015	6.79	MyD88-independent TLR4 cascade	108	6	11.5	3e-07	29.6
RNA Polymerase II Transcription	1284	8	3.02	0.0087	3.12	Cellular response to starvation	154	8	12.8	6.6e-09	29.2
						Estrogen-dependent gene expression	90	5	10.5	2.6e-06	28.7
						Regulation of TP53 Activity	159	8	12.6	8.2e-09	28.2
						Toll Like Receptor TLR1:TLR2 Cascade	115	6	11.1	4e-07	27.6
						PTEN Regulation	139	7	11.8	6.6e-08	27.4
						Signaling by TGF-beta Receptor Complex	94	5	10.3	3.2e-06	27.4
						p75 NTR receptor-mediated signalling	95	5	10.2	3.3e-06	27.1
						Regulation of expression of SLITs and ROBOs	170	8	12.2	1.2e-08	26.3
						Infectious disease	898	23	14.9	7.5e-18	26
						SUMOylation	173	8	12	1.4e-08	25.8
						SARS-CoV-2 activates/modulates innate and adaptive immune responses	123	6	10.7	5.6e-07	25.7
						Interleukin-1 family signaling	151	7	11.3	1.1e-07	25.1
						Factors involved in megakaryocyte development and platelet production	154	7	11.2	1.2e-07	24.6
						SARS-CoV-2 Infection	291	11	12.7	3e-10	23
						Toll-like Receptor Cascades	165	7	10.7	1.8e-07	22.9
						rRNA processing	198	8	11.2	3.7e-08	22.4
						Interleukin-1 signaling	114	5	9.23	7.8e-06	22.4
						Viral Infection Pathways	705	19	13.9	4.5e-15	22.2
						Interferon Signaling	267	10	12	1.5e-09	22.1
						Intracellular signaling by second messengers	308	11	12.3	4.5e-10	21.7
						Transcriptional regulation by RUNX1	177	7	10.3	2.7e-07	21.2
						Transcriptional regulation by RUNX2	120	5	8.97	9.7e-06	21.2
						Signaling by TGFB family members	124	5	8.81	1.1e-05	20.5
						Signaling by ROBO receptors	216	8	10.6	6.6e-08	20.4
						Epigenetic regulation of gene expression	125	5	8.77	1.2e-05	20.3
						ESR-mediated signaling	161	6	9.24	2.4e-06	19.4
						Programmed Cell Death	203	7	9.56	5.7e-07	18.4
						Apoptosis	171	6	8.93	3.3e-06	18.2
						TCF dependent signaling in response to WNT	172	6	8.9	3.3e-06	18.1
						Cellular response to chemical stress	211	7	9.35	7.3e-07	17.7
						Diseases of signal transduction by growth factor receptors and second messengers	428	12	11.2	7.3e-10	17.4
						Cellular responses to stimuli	746	17	11.9	2.6e-12	16.9
						Death Receptor Signaling	152	5	7.85	2.9e-05	16.5
						Transcriptional Regulation by TP53	359	10	10.1	1.7e-08	16.1
						Translation	272	8	9.34	3e-07	16.1
						Signaling by Receptor Tyrosine Kinases	523	13	10.9	5.2e-10	15.9
						Ub-specific processing proteases	165	5	7.49	4.2e-05	15.2
						Chromatin modifying enzymes	204	6	8.07	8.5e-06	15.1
						Developmental Biology	1156	20	10.9	1.7e-12	14.4
						Cytokine Signaling in Immune system	770	15	10.1	4.5e-10	13.2
						Signaling by Nuclear Receptors	236	6	7.41	1.9e-05	13
						RNA Polymerase II Transcription	1284	20	10.2	8e-12	12.9
						Nervous system development	576	12	9.37	1.2e-08	12.7
						Deubiquitination	243	6	7.28	2.2e-05	12.6
						Mitotic G2-G2/M phases	198	5	6.73	9.6e-05	12.6
						Signaling by Interleukins	459	10	8.77	1.4e-07	12.5
						Metabolism of amino acids and derivatives	356	8	7.97	1.8e-06	12.1
						Signaling by WNT	268	6	6.87	3.7e-05	11.4
						DNA Repair	286	6	6.6	5.2e-05	10.7
						Cell Cycle Checkpoints	256	5	5.75	0.00031	9.63
						Hemostasis	608	10	7.35	1.3e-06	9.28
						MAPK family signaling cascades	321	5	4.97	0.00087	7.62
						Innate Immune System	1047	12	6.33	3.4e-06	6.73
						Cell Cycle	628	8	5.51	8.8e-05	6.69
						Cell Cycle, Mitotic	497	6	4.57	0.00095	6
						Metabolism of RNA	703	8	5.08	0.00019	5.94
						Post-translational protein modification	1348	13	5.81	7.7e-06	5.75
						Adaptive Immune System	773	5	2.44	0.033	3.05

## Sheet: Table S5.6
Table S5.6 Pathway enrichment of Cortex crosstalk genes
East Asian						European
Pathway	Pathway Size	Overlap Count	Z-score	Adjusted P-value	Odds Ratio	Pathway	Pathway Size	Overlap Count	Z-score	Adjusted P-value	Odds Ratio
Eukaryotic Translation Elongation	92	29	63.2	9.5e-59	853	SARS-CoV-1 modulates host translation machinery	35	19	64.8	2.2e-42	880
Response of EIF2AK4 (GCN2) to amino acid deficiency	100	29	60.6	8.3e-58	755	Eukaryotic Translation Elongation	92	31	65.1	1.4e-62	852
Selenoamino acid metabolism	107	29	58.6	5.4e-57	686	Response of EIF2AK4 (GCN2) to amino acid deficiency	100	31	62.4	1.6e-61	751
SRP-dependent cotranslational protein targeting to membrane	111	29	57.5	1.4e-56	652	Selenoamino acid metabolism	107	31	60.3	1.3e-60	680
Nonsense-Mediated Decay (NMD)	114	29	56.8	2.7e-56	617	SRP-dependent cotranslational protein targeting to membrane	111	31	59.2	3.6e-60	645
Eukaryotic Translation Initiation	118	29	55.8	7.1e-56	591	Nonsense-Mediated Decay (NMD)	114	31	58.4	7.5e-60	621
SARS-CoV-1 modulates host translation machinery	35	15	53	4.6e-32	533	Eukaryotic Translation Initiation	118	31	57.4	2.1e-59	592
Cellular response to starvation	154	29	48.7	3e-52	423	SARS-CoV-2 modulates host translation machinery	49	19	54.7	8.7e-39	476
Influenza Infection	154	29	48.7	3e-52	423	Cellular response to starvation	154	31	50.2	1.8e-55	413
Regulation of expression of SLITs and ROBOs	170	29	46.4	6.2e-51	376	Influenza Infection	154	31	50.2	1.8e-55	413
SARS-CoV-2 modulates host translation machinery	49	15	44.8	2e-29	314	Regulation of expression of SLITs and ROBOs	170	31	47.7	4.7e-54	366
rRNA processing	198	29	42.9	6.7e-49	313	Activation of the mRNA upon binding of the cap-binding complex and eIFs, and subsequent binding to 43S	58	19	50.2	3.5e-37	363
Signaling by ROBO receptors	216	29	41	9e-48	283	rRNA processing	198	31	44.1	7.3e-52	305
Activation of the mRNA upon binding of the cap-binding complex and eIFs, and subsequent binding to 43S	58	15	41.1	3.3e-28	252	Signaling by ROBO receptors	216	31	42.2	1.2e-50	275
Translation	272	29	36.5	9.8e-45	216	SARS-CoV-1-host interactions	92	21	43.9	1.9e-37	244
Metabolism of amino acids and derivatives	356	30	32.9	1.8e-43	188	Translation	272	31	37.5	2.2e-47	211
SARS-CoV-1-host interactions	92	17	36.9	2.9e-29	179	Metabolism of amino acids and derivatives	356	31	32.7	1.3e-43	155
Cellular responses to stimuli	746	32	23.9	1.4e-37	119	SARS-CoV-1 Infection	137	21	35.9	1.4e-33	149
SARS-CoV-1 Infection	137	17	30.1	3.6e-26	111	Nervous system development	576	32	26.2	5.1e-39	105
Nervous system development	576	29	24.7	4.3e-35	94.9	Viral Infection Pathways	705	33	24.4	3.6e-38	98.1
Metabolism of RNA	703	30	23	1.8e-34	89.2	Cellular responses to stimuli	746	33	23.6	2.1e-37	92.3
Viral Infection Pathways	705	30	23	1.8e-34	88.9	SARS-CoV-2-host interactions	198	20	28.2	4.3e-28	88.3
SARS-CoV-2-host interactions	198	17	24.9	2.3e-23	73.6	Infectious disease	898	33	21.4	9.2e-35	75.3
Infectious disease	898	30	20.2	2.4e-31	68.3	Metabolism of RNA	703	31	22.8	1.7e-34	73.8
Developmental Biology	1156	30	17.5	3.8e-28	51.8	Developmental Biology	1156	34	19.2	5.7e-33	67.5
SARS-CoV-2 Infection	291	17	20.3	1.7e-20	48.5	SARS-CoV-2 Infection	291	20	23.1	1.1e-24	57.6
SARS-CoV Infections	414	17	16.8	6.7e-18	33.2	SARS-CoV Infections	414	21	20.1	3.2e-23	43.6
Transcriptional Regulation by TP53	359	5	4.69	0.0013	6.99	The role of GTSE1 in G2/M progression after G2 checkpoint	78	5	11	2.1e-06	31.6
						Clathrin-mediated endocytosis	145	5	7.84	4.1e-05	16.4
						Regulation of TP53 Activity	159	5	7.43	6.1e-05	14.9
						Mitotic G2-G2/M phases	198	6	7.98	1.3e-05	14.7
						Signaling by NOTCH	176	5	7.01	9.6e-05	13.4
						Deubiquitination	243	5	5.76	0.00041	9.6
						Cell Cycle Checkpoints	256	5	5.57	0.0005	9.1
						Intracellular signaling by second messengers	308	5	4.94	0.0011	7.52
						MAPK family signaling cascades	321	5	4.81	0.0013	7.2
						Diseases of signal transduction by growth factor receptors and second messengers	428	6	4.91	0.00072	6.61
						Transcriptional Regulation by TP53	359	5	4.45	0.002	6.41
						Cell Cycle, Mitotic	497	6	4.41	0.0015	5.66
						Cell Cycle	628	6	3.67	0.0045	4.43
						Signaling by Receptor Tyrosine Kinases	523	5	3.34	0.0095	4.34
						Post-translational protein modification	1348	11	4.43	0.00041	4.21
						Membrane Trafficking	624	5	2.87	0.019	3.61
						Vesicle-mediated transport	671	5	2.68	0.024	3.34

## Sheet: Table S5.7
Table S5.7 Pathway enrichment of Pituitary crosstalk genes
East Asian						European
Pathway	Pathway Size	Overlap Count	Z-score	Adjusted P-value	Odds Ratio	Pathway	Pathway Size	Overlap Count	Z-score	Adjusted P-value	Odds Ratio
Hormone ligand-binding receptors	12	8	49.7	3.2e-19	1210	Hormone ligand-binding receptors	12	8	48.4	5.3e-19	1120
Peptide hormone biosynthesis	14	7	40.2	6.3e-16	566	Peptide hormone biosynthesis	14	6	33.5	4.1e-13	385
G alpha (s) signalling events	149	25	43.8	4.7e-43	304	G alpha (s) signalling events	149	20	34	7.6e-31	142
TFAP2 (AP-2) family regulates transcription of growth factors and their receptors	15	5	27.7	1.3e-10	268	Peptide hormone metabolism	88	9	19.8	4.1e-13	65.1
Glucagon-type ligand receptors	33	9	33.6	2.7e-17	228	GPCR ligand binding	450	20	19.1	2.7e-21	42
Peptide hormone metabolism	88	11	24.9	4.4e-17	94.7	Class A/1 (Rhodopsin-like receptors)	320	16	18.1	6.7e-18	39.2
GPCR ligand binding	450	25	24.8	8.3e-31	86.8	Signaling by GPCR	683	20	15.1	5.2e-18	26.9
Transcriptional regulation by the AP-2 (TFAP2) family of transcription factors	38	5	17.2	1.9e-08	81.2	RNA Polymerase II Transcription	1284	11	4.93	0.00011	4.94
Class B/2 (Secretin family receptors)	92	9	19.9	3.7e-13	66.6	Signaling by Receptor Tyrosine Kinases	523	5	3.56	0.007	4.73
Signaling by GPCR	683	26	20.7	3.5e-28	63.4	Developmental Biology	1156	6	2.16	0.044	2.54
Class A/1 (Rhodopsin-like receptors)	320	16	18.7	2.9e-18	43.1
RNA Polymerase II Transcription	1284	8	3.28	0.0055	3.45
Infectious disease	898	5	2.27	0.042	2.86
