# Supplementary material for: Evidence-based genetic variants to gene mapping and prioritization uncovers distinct molecular pathophysiology and therapeutic landscape in polycystic ovary syndrome patients of different ethnicities.
Source: Research Square preprint supplement (doi:10.21203/rs.3.rs-8610143/v1), 2026-01-22
Supplement: Supplementary file 7 [file da340f679da31ce173a410bb.xlsx]

## Sheet: Table S1.1
Table S1.1.1 List of lead retrieved from population specific GWAS summary statistics in PCOS							Table S1.1.2 Correlation of alleles between lead GWAS SNP and linked variants
East Asian			European				East Asian			European
Study	SNP	P value	Study	SNP	P value		Lead SNP	Linked SNP	r2	Lead SNP	Linked SNP	r2
Genome-wide association study identifies susceptibility loci for polycystic ovary syndrome on chromosome 2p16.3, 2p21 and 9q33.3.	rs13429458	2e-23	Distinct subtypes of polycystic ovary syndrome with novel genetic associations: An unsupervised, phenotypic clustering analysis.	rs78025940	2e-10		rs13405728	rs13405728	1	rs78025940	rs78025940	1
	rs12478601	3e-23		rs76182733	3e-09		rs13405728	rs10176989	0.9652	rs78025940	rs16850206	0.6907
	rs11891936	6e-23		rs17023134	1e-08		rs13405728	rs7562879	0.9603	rs78025940	rs16850197	0.6469
	rs17030684	2e-22		rs7735176	1e-08		rs13405728	rs7563126	0.9603	rs76182733	rs76182733	1
	rs1038822	3e-22		rs55762028	1e-08		rs13405728	rs7594589	0.9603	rs76182733	rs56302957	1
	rs7567607	2e-21		rs10835638	5e-12		rs13405728	rs13432488	0.9505	rs76182733	rs55864681	1
	rs7559891	3e-21		rs10993397	1e-05		rs13405728	rs6732721	0.9408	rs76182733	rs75198050	1
	rs13405728	8e-21		rs11031006	3e-10		rs13405728	rs10209331	0.9363	rs76182733	rs74519428	1
	rs12468394	2e-20		rs11031006	9e-06		rs13405728	rs12713014	0.9319	rs76182733	rs76577141	1
	rs7596052	3e-20	Large-scale genome-wide meta-analysis of polycystic ovary syndrome suggests shared genetic architecture for different diagnosis criteria.	rs12478601	8e-07		rs13405728	rs138687802	0.9316	rs76182733	rs74829685	1
	rs10179648	1e-19		rs2349415	1e-05		rs13405728	rs140967035	0.9316	rs76182733	rs75577134	1
	rs2479106	8e-19		rs4385527	5e-07		rs13405728	rs7582603	0.931	rs76182733	rs79388388	1
	rs6726014	1e-18		rs1894116	2e-09		rs13405728	rs7595136	0.9214	rs76182733	rs76401373	1
	rs7568365	1e-18		rs705702	2e-06		rs13405728	rs7567846	0.8859	rs76182733	rs79357137	0.9324
	rs6731009	4e-18		rs7563201	4e-10		rs13405728	rs7606567	0.795	rs76182733	rs79733838	0.9324
	rs10818854	9e-18		rs2178575	3e-14		rs13405728	rs12994872	0.76	rs76182733	rs75806518	0.9276
	rs7582497	3e-17		rs13164856	1e-10		rs13405728	rs35429744	0.7128	rs76182733	rs78848958	0.9276
	rs6744642	3e-17		rs804279	4e-12		rs13405728	rs141244623	0.6909	rs76182733	rs532601941	0.9276
	rs10176241	4e-17		rs10739076	3e-08		rs13405728	rs10180731	0.6894	rs76182733	rs560402625	0.9276
	rs10165527	1e-16		rs7864171	3e-08		rs13405728	rs75100946	0.6873	rs76182733	rs76765636	0.9276
	rs1873555	2e-16		rs9696009	8e-11		rs13405728	rs10176937	0.6831	rs76182733	rs77198154	0.9276
	rs7857605	1e-15		rs11031005	9e-13		rs13405728	rs12615738	0.6831	rs76182733	rs56397072	0.9276
	rs1778890	2e-15		rs11225154	5e-11		rs13405728	rs7583082	0.6252	rs76182733	rs76876482	0.9276
	rs4340576	2e-15		rs1784692	2e-10		rs13405728	rs6751138	0.5878	rs76182733	rs79906822	0.9276
	rs2374551	7e-15		rs2271194	5e-09		rs13405728	rs7561945	0.5806	rs76182733	rs80231886	0.9276
	rs10986105	7e-15		rs1795379	2e-09		rs13405728	rs7562215	0.5712	rs76182733	rs73129834	0.8732
	rs1627536	1e-13		rs8043701	1e-09		rs13405728	rs7588339	0.5712	rs76182733	rs2077828	0.8732
	rs7558302	2e-13		rs853854	2e-09		rs13405728	rs10495959	0.5613	rs76182733	rs2077827	0.8732
High Genetic Risk Scores of ASIC2, MACROD2, CHRM3, and C2orf83 Genetic Variants Associated with Polycystic Ovary Syndrome Impair Insulin Sensitivity and Interact with Energy Intake in Korean Women.	rs2060941	5e-08	Causal mechanisms and balancing selection inferred from genetic associations with polycystic ovary syndrome.	rs7563201	3e-10		rs13405728	rs3884614	0.5093	rs76182733	rs6745302	0.8732
	rs1159315	2e-07		rs1351592	1e-12		rs13405728	rs4637174	0.5022	rs76182733	rs10193278	0.8604
	rs17608925	2e-06		rs11225154	8e-11		rs10165527	rs10165527	1	rs76182733	rs78752798	0.8604
	rs12450465	8e-06		rs11031006	1e-09		rs10165527	rs17031028	1	rs76182733	rs113770131	0.8604
	rs8071961	8e-06		rs13164856	4e-09		rs10165527	rs6754589	1	rs76182733	rs76804064	0.8604
	rs7262810	2e-05		rs1275468	2e-08		rs10165527	rs6754878	1	rs76182733	rs73127891	0.8604
	rs223031	2e-05	Genome-wide association of polycystic ovary syndrome implicates alterations in gonadotropin secretion in European ancestry populations.	rs804279	8e-10		rs10165527	rs6726014	1	rs76182733	rs80148244	0.8604
Genome-wide association study identified new susceptibility loci for polycystic ovary syndrome.	rs10505648	5e-08		rs10993397	5e-13		rs10165527	rs7596052	1	rs76182733	rs73127887	0.8604
	rs7666129	6e-06		rs11031006	2e-08		rs10165527	rs6725776	0.9948	rs76182733	rs1922798	0.8604
	rs500492	6e-06		rs11031006	3e-16		rs10165527	rs57477603	0.9948	rs76182733	rs73127884	0.8604
	rs1159315	1e-05		rs644592	2e-05		rs10165527	rs59669565	0.9897	rs76182733	rs73127880	0.8604
	rs7652876	3e-05		rs76169311	3e-07		rs10165527	rs13000971	0.9897	rs76182733	rs73127879	0.8604
	rs11536913	3e-05		rs76484234	3e-05		rs10165527	rs11903287	0.9897	rs76182733	rs10179644	0.8604
Genome-wide association study identifies eight new risk loci for polycystic ovary syndrome.	rs705702	9e-26		rs56949836	4e-07		rs10165527	rs6730500	0.9897	rs76182733	rs73127866	0.7511
	rs1894116	1e-22		rs79743873	3e-05		rs10165527	rs4337518	0.9897	rs76182733	rs199760770	0.7331
	rs2292239	3e-22		rs77667361	5e-06		rs10165527	rs6730316	0.9897	rs76182733	rs73127885	0.7061
	rs2272046	2e-21		rs112004774	2e-05		rs10165527	rs6544672	0.9897	rs76182733	rs11893167	0.7061
	rs877636	4e-20		rs140485756	2e-07		rs10165527	rs2888875	0.9897	rs76182733	rs76557076	0.7061
	rs2069408	4e-17		chr10:119956844	7e-07		rs10165527	rs1873556	0.9846	rs76182733	rs78709179	0.7061
	rs3802457	5e-14		rs112137861	3e-07		rs10165527	rs56304210	0.9846	rs76182733	rs75620719	0.7061
	rs13429458	4e-13		chr10:65193342	2e-07		rs10165527	rs3042329	0.9845	rs76182733	rs73998637	0.6661
	rs2268361	1e-12		rs74585555	5e-07		rs10165527	rs9973398	0.9796	rs76182733	rs59003890	0.5981
	rs12468394	2e-12		rs706560	6e-06		rs10165527	rs1873555	0.9796	rs76182733	rs6749165	0.5981
	rs10865238	2e-12		rs181791462	5e-06		rs10165527	rs150495967	0.9796	rs76182733	rs3761713	0.5981
	rs4744370	2e-12		rs146813585	3e-06		rs10165527	rs7599137	0.9796	rs76182733	rs199841986	0.5775
	rs2349415	2e-12		rs7574059	2e-07		rs10165527	rs7583837	0.9796	rs76182733	rs4414633	0.5538
	rs4784165	4e-11		rs1784692	1e-06		rs10165527	rs6738189	0.9795	rs76182733	rs74000405	0.5538
	rs12478601	3e-10		rs1355471	8e-08		rs10165527	rs6544670	0.9795	rs76182733	rs13409153	0.5538
	rs2479106	5e-10	Leveraging Northern European population history: novel low-frequency variants for polycystic ovary syndrome.	rs7564590	5e-11		rs10165527	rs147196397	0.9746	rs76182733	rs13404668	0.5319
	rs6022786	2e-09		rs9312937	2e-08		rs10165527	rs970176	0.9744	rs76182733	rs7600965	0.5319
	rs13405728	4e-09		rs3945628	3e-12		rs10165527	rs10164789	0.9743	rs76182733	rs13421791	0.5182
	rs4385527	6e-09		rs11031002	9e-09		rs10165527	rs2011979	0.9743	rs76182733	rs60545079	0.5182
	rs2059807	1e-08		rs1672716	1e-08		rs10165527	rs1873558	0.9742	rs76182733	rs6742302	0.5117
	rs10986105	1e-06		rs145598156	4e-08		rs10165527	rs1158411	0.9742	rs17023134	rs17023134	1
Variants in FSHB Are Associated With Polycystic Ovary Syndrome and Luteinizing Hormone Level in Han Chinese Women	rs11031010	4e-08		rs182075939	2e-16		rs10165527	rs11884742	0.9742	rs17023134	rs78890352	0.9833
A genome-wide association study identifies FSHR rs2300441 associated with follicle-stimulating hormone levels.	rs2300441	7e-14		rs7564590	5e-09		rs10165527	rs141311393	0.9696	rs17023134	rs115135623	0.7054
	rs2300440	2e-12		rs3945628	1e-08		rs10165527	rs74776407	0.9696	rs17023134	rs139907820	0.7054
	rs6166	8e-10		rs182075939	5e-14		rs10165527	rs76896890	0.9696	rs17023134	rs115882933	0.6759
	rs7565565	2e-09		rs9312937	3e-06		rs10165527	rs7578245	0.9696	rs17023134	rs116306322	0.5932
	rs6165	3e-09		rs1672716	5e-07		rs10165527	rs12990267	0.9696	rs17023134	rs77601428	0.5619
	rs1024777	4e-09		rs145598156	4e-05		rs10165527	rs6756710	0.9694	rs7735176	rs7735176	1
	rs13032037	5e-09					rs10165527	rs6712861	0.9694	rs7735176	rs16893866	1
	rs2072485	5e-09					rs10165527	rs881477	0.9694	rs7735176	rs16893869	0.8165
	rs12620721	5e-09					rs10165527	rs881476	0.9694	rs7735176	rs16893872	0.8165
	rs2072484	7e-09					rs10165527	rs1873557	0.9691	rs7735176	rs16893874	0.8165
	rs2072483	7e-09					rs10165527	rs34512555	0.9691	rs7735176	rs76406641	0.8165
	rs10644983	1e-08					rs10165527	rs78870521	0.9647	rs7735176	rs1820873	0.8165
	rs2284673	3e-08					rs10165527	rs2374551	0.9642	rs7735176	rs574767688	0.8165
	rs2268361	9e-08					rs10165527	rs6730741	0.9642	rs7735176	rs73062576	0.8165
	rs917942	6e-07					rs10165527	rs199721109	0.9598	rs7735176	rs142582250	0.8165
	rs11444533	8e-07					rs10165527	rs12470831	0.9595	rs7735176	rs112539425	0.8165
	rs12713028	8e-07					rs10165527	rs10211106	0.9591	rs7735176	rs78725071	0.8165
	rs2349413	1e-06					rs10165527	rs11884565	0.9591	rs7735176	rs141940927	0.8165
	rs1922470	1e-06					rs10165527	rs6758733	0.9589	rs7735176	rs115902533	0.8165
	rs917944	1e-06					rs10165527	rs6742108	0.9589	rs7735176	rs73060433	0.8165
	rs2349414	1e-06					rs10165527	rs17031065	0.9546	rs7735176	rs7719977	0.8165
	rs1922471	1e-06					rs10165527	rs11898207	0.9546	rs7735176	rs73060412	0.8165
	rs7594633	1e-06					rs10165527	rs150227913	0.9546	rs7735176	rs141440947	0.8165
	rs7571781	1e-06					rs10165527	rs11899823	0.9546	rs7735176	rs73060409	0.8165
	rs917945	1e-06					rs10165527	rs12477928	0.9546	rs7735176	rs77331896	0.8165
	rs7591844	1e-06					rs10165527	rs12477964	0.9546	rs7735176	rs76714493	0.8165
	rs4953655	2e-06					rs10165527	rs6705356	0.9538	rs7735176	rs151182008	0.8165
	rs12713029	2e-06					rs10165527	rs146866240	0.9538	rs7735176	rs140269863	0.7251
	rs6733819	2e-06					rs10165527	rs6731009	0.9497	rs7735176	rs140793180	0.6434
	rs2072486	3e-06					rs10165527	rs13021894	0.9497	rs55762028	rs55762028	1
	rs13008674	3e-06					rs10165527	rs11888482	0.9441	rs55762028	rs1394240	1
	rs62162141	5e-06					rs10165527	rs74659914	0.9437	rs55762028	rs988990	1
	rs62162144	5e-06					rs10165527	rs34154601	0.9436	rs55762028	rs56264759	0.7251
	rs140123771	5e-06					rs10165527	rs112438660	0.9392	rs55762028	rs1976490	0.7251
	rs10432668	5e-06					rs10165527	rs6739345	0.9388	rs55762028	rs10930098	0.7251
	rs148306119	5e-06					rs10165527	rs201795193	0.9336	rs55762028	rs10930097	0.7251
	rs62162146	5e-06					rs10165527	rs12466030	0.9241	rs55762028	rs12052767	0.7251
	rs17038315	6e-06					rs10165527	rs35645305	0.9237	rs55762028	rs28396922	0.7251
	rs11688329	6e-06					rs10165527	rs17031056	0.9235	rs55762028	rs73973346	0.7251
	rs17038310	7e-06					rs10165527	rs35319517	0.9185	rs55762028	rs4525716	0.7251
	rs1504164	7e-06					rs10165527	rs148527005	0.9134	rs55762028	rs10930096	0.5427
	rs1504165	7e-06					rs10165527	rs11890152	0.9111	rs55762028	rs16848277	0.5427
	rs11678373	8e-06					rs10165527	rs11443399	0.9098	rs55762028	rs12052513	0.5427
	rs12614875	8e-06					rs10165527	rs11904510	0.9034	rs55762028	rs1604837	0.5427
	rs7151257	8e-06					rs10165527	rs6544674	0.8996	rs55762028	rs7560445	0.5427
	rs11070169	9e-06					rs10165527	rs79732325	0.8986	rs55762028	rs76574872	0.5427
	rs60745617	1e-05					rs10165527	rs71410186	0.8986	rs55762028	rs79201453	0.5427
	rs1126076	1e-05					rs10165527	rs144688207	0.8985	rs55762028	rs16848308	0.5427
	rs28513867	2e-05					rs10165527	rs17031097	0.894	rs55762028	rs12052268	0.5427
	rs75673607	2e-05					rs10165527	rs35899859	0.889	rs55762028	rs72623142	0.5427
	rs12614425	2e-05					rs10165527	rs17031100	0.889	rs55762028	rs16848327	0.5427
	rs4109610	2e-05					rs10165527	rs4952992	0.8848	rs55762028	rs10930099	0.5427
							rs10165527	rs12052942	0.8842	rs55762028	rs80022235	0.5427
							rs10165527	rs17031102	0.8842	rs55762028	rs10930093	0.5427
							rs10165527	rs34925018	0.884	rs55762028	rs79998862	0.5427
							rs10165527	rs142959198	0.8835	rs55762028	rs72623143	0.5427
							rs10165527	rs66702817	0.8618	rs55762028	rs16848342	0.5427
							rs10165527	rs74343467	0.8523	rs55762028	rs75302386	0.5427
							rs10165527	rs13032919	0.8523	rs55762028	rs77922700	0.5427
							rs10165527	rs13013639	0.8509	rs55762028	rs74561164	0.5427
							rs10165527	rs6544671	0.8482	rs55762028	rs2927197	0.5427
							rs10165527	rs59470270	0.8464	rs55762028	rs78847584	0.5427
							rs10165527	rs72613902	0.8453	rs55762028	rs79673392	0.5427
							rs10165527	rs1491508	0.8419	rs55762028	rs79621698	0.5427
							rs10165527	rs7600872	0.839	rs55762028	rs75597460	0.5427
							rs10165527	rs13016288	0.8374	rs55762028	rs75377219	0.5427
							rs10165527	rs1472100	0.835	rs55762028	rs77102017	0.5427
							rs10165527	rs10650807	0.8299	rs55762028	rs1221531	0.5427
							rs10165527	rs1807866	0.827	rs55762028	rs13400537	0.5427
							rs10165527	rs3752355	0.8249	rs55762028	rs1676037	0.5427
							rs10165527	rs4146253	0.823	rs55762028	rs78759089	0.5427
							rs10165527	rs145706702	0.8191	rs55762028	rs77057895	0.5427
							rs10165527	rs34717327	0.8155	rs55762028	rs75755346	0.5427
							rs10165527	rs13022691	0.8119	rs55762028	rs10174564	0.5427
							rs10165527	rs11899260	0.8118	rs55762028	rs77465771	0.5427
							rs10165527	rs11888640	0.8118	rs55762028	rs10171494	0.5427
							rs10165527	rs6744642	0.811	rs55762028	rs7576949	0.5427
							rs10165527	rs34461850	0.8075	rs55762028	rs57075312	0.5185
							rs10165527	rs17031110	0.8057	rs10835638	rs10835638	1
							rs10165527	rs7605725	0.8001	rs10835638	rs11031010	0.9919
							rs10165527	rs10179648	0.7968	rs10835638	rs12364889	0.9919
							rs10165527	rs10865192	0.7958	rs10835638	rs11031033	0.9919
							rs10165527	rs17031112	0.7916	rs10835638	rs11031034	0.9919
							rs10165527	rs7563876	0.7873	rs10835638	rs11031035	0.9919
							rs10165527	rs10200833	0.7866	rs10835638	rs4120817	0.9919
							rs10165527	rs57758828	0.786	rs10835638	rs201518807	0.9919
							rs10165527	rs11429002	0.7845	rs10835638	rs10835644	0.9919
							rs10165527	rs6544673	0.7822	rs10835638	rs10835645	0.9919
							rs10165527	rs4952990	0.7775	rs10835638	rs10835646	0.9919
							rs10165527	rs7559891	0.7773	rs10835638	rs12281078	0.9919
							rs10165527	rs11896747	0.7736	rs10835638	rs12294258	0.9919
							rs10165527	rs12478601	0.7648	rs10835638	rs11031039	0.9919
							rs10165527	rs1038822	0.7586	rs10835638	rs7123626	0.9919
							rs10165527	rs67193054	0.7492	rs10835638	rs12361594	0.9919
							rs10165527	rs6751622	0.7451	rs10835638	rs1947381630	0.9919
							rs10165527	rs999949	0.7343	rs10835638	rs201665959	0.9919
							rs10165527	rs6544661	0.732	rs10835638	rs7118949	0.9838
							rs10165527	rs34859017	0.726	rs10835638	rs7121963	0.9838
							rs10165527	rs6746064	0.725	rs10835638	rs7122449	0.9838
							rs10165527	rs6544660	0.7243	rs10835638	rs11512201	0.9838
							rs10165527	rs13423972	0.7232	rs10835638	rs10835655	0.9838
							rs10165527	rs6761913	0.7209	rs10835638	rs12272134	0.9838
							rs10165527	rs11891936	0.7124	rs10835638	rs12278112	0.9838
							rs10165527	rs12990177	0.7124	rs10835638	rs141402489	0.9838
							rs10165527	rs10186921	0.7124	rs10835638	rs11031052	0.9838
							rs10165527	rs7355361	0.7069	rs10835638	rs7926666	0.9838
							rs10165527	rs35186748	0.7057	rs10835638	rs12285277	0.9838
							rs10165527	rs7591218	0.7042	rs10835638	rs11031056	0.9838
							rs10165527	rs34549634	0.7031	rs10835638	rs150144809	0.9838
							rs10165527	rs13017478	0.703	rs10835638	rs12365913	0.9838
							rs10165527	rs6544644	0.7003	rs10835638	rs10835658	0.9838
							rs10165527	rs17030684	0.6988	rs10835638	rs12363432	0.9838
							rs10165527	rs7582497	0.6968	rs10835638	rs74331022	0.9838
							rs10165527	rs7568365	0.6968	rs10835638	rs12278547	0.9758
							rs10165527	rs7567607	0.6968	rs10835638	rs7116893	0.9758
							rs10165527	rs12185704	0.6941	rs10835638	rs7117691	0.9758
							rs10165527	rs10176241	0.6938	rs10835638	rs369574340	0.9681
							rs10165527	rs12712881	0.6904	rs10835638	rs67286303	0.9447
							rs10165527	rs6544659	0.6872	rs10835638	rs7949790	0.9011
							rs10165527	rs7569721	0.6815	rs10835638	rs11031058	0.9011
							rs10165527	rs871852	0.6802	rs10835638	rs76959488	0.9011
							rs10165527	rs10182489	0.6765	rs10835638	rs10835660	0.9011
							rs10165527	rs11900952	0.6586	rs10835638	rs74485684	0.856
							rs10165527	rs7563201	0.6577	rs10835638	rs75525300	0.856
							rs10165527	rs7589428	0.6567	rs10835638	rs12278989	0.856
							rs10165527	rs6544641	0.6546	rs10835638	rs11031040	0.856
							rs10165527	rs6544640	0.6546	rs10835638	rs12271187	0.856
							rs10165527	rs34513683	0.6513	rs10835638	rs12271300	0.856
							rs10165527	rs6719534	0.6476	rs10835638	rs10835649	0.856
							rs10165527	rs7575635	0.6454	rs10835638	rs4071563	0.856
							rs10165527	rs11693801	0.6449	rs10835638	rs11031047	0.856
							rs10165527	rs35043804	0.642	rs10835638	rs7947350	0.856
							rs10165527	rs6712163	0.6418	rs10835638	rs12363824	0.856
							rs10165527	rs6544638	0.6418	rs10835638	rs6484479	0.856
							rs10165527	rs7561670	0.6409	rs10835638	rs3858429	0.856
							rs10165527	rs6708167	0.6365	rs10835638	rs4071558	0.856
							rs10165527	rs7580013	0.6323	rs10835638	rs4071559	0.856
							rs10165527	rs35267248	0.6288	rs10835638	rs10616649	0.856
							rs10165527	rs6730757	0.621	rs10835638	rs7929660	0.8497
							rs10165527	rs13026309	0.6199	rs10835638	rs902156529	0.8253
							rs10165527	rs11124930	0.6175	rs10835638	rs10835661	0.8242
							rs10165527	rs6749927	0.61	rs10835638	rs12294104	0.818
							rs10165527	rs1465618	0.6073	rs10835638	rs12223987	0.804
							rs10165527	rs151205804	0.6019	rs10835638	rs11031002	0.7948
							rs10165527	rs11897732	0.5986	rs10835638	rs11031006	0.6735
							rs10165527	rs6714624	0.5983	rs10835638	rs11031005	0.666
							rs10165527	rs34640832	0.5978	rs10835638	rs200290543	0.5497
							rs10165527	rs7595299	0.594	rs10993397	rs10993397	1
							rs10165527	rs12468394	0.5849	rs10993397	rs10993394	1
							rs10165527	rs7558302	0.5729	rs10993397	rs12235316	1
							rs10165527	rs72613901	0.563	rs10993397	rs10993398	1
							rs10165527	rs7599564	0.5629	rs10993397	rs7853195	0.9918
							rs10165527	rs13417665	0.5583	rs10993397	rs4744411	0.9918
							rs10165527	rs6749108	0.5547	rs10993397	rs1123534	0.9876
							rs10165527	rs7572765	0.5542	rs10993397	rs10821415	0.9836
							rs10165527	rs13429458	0.554	rs10993397	rs7864171	0.9836
							rs10165527	rs535503344	0.5513	rs10993397	rs2183958	0.9795
							rs10165527	rs72613900	0.55	rs10993397	rs7865239	0.9633
							rs10165527	rs72616903	0.5415	rs10993397	rs4744403	0.9472
							rs10165527	rs13402827	0.5373	rs10993397	rs11787821	0.9472
							rs10165527	rs13030651	0.5326	rs10993397	rs4385527	0.9431
							rs10165527	rs72613899	0.5308	rs10993397	rs35487382	0.9351
							rs10165527	rs4340576	0.52	rs10993397	rs356131	0.9351
							rs10818854	rs10818854	1	rs10993397	rs356141	0.9272
							rs10818854	rs73577291	1	rs10993397	rs7019720	0.9272
							rs10818854	rs10760294	1	rs10993397	rs10993377	0.9272
							rs10818854	rs7851094	0.9801	rs10993397	rs7866848	0.9233
							rs10818854	rs73580155	0.9801	rs10993397	rs414253	0.9193
							rs10818854	rs10986079	0.9797	rs10993397	rs406654	0.9193
							rs10818854	rs11430188	0.9609	rs10993397	rs10993418	0.9155
							rs10818854	rs58097039	0.9609	rs10993397	rs10993372	0.9073
							rs10818854	rs57299923	0.9609	rs10993397	rs10993365	0.9073
							rs10818854	rs2062647351	0.9609	rs10993397	rs140564406	0.9073
							rs10818854	rs12340067	0.9599	rs10993397	rs10821401	0.9073
							rs10818854	rs201435453	0.9205	rs10993397	rs4744378	0.9073
							rs10818854	rs10818862	0.9205	rs10993397	rs391784	0.9073
							rs10818854	rs12351438	0.9075	rs10993397	rs35102751	0.9034
							rs10818854	rs10818847	0.9075	rs10993397	rs1751434	0.8994
							rs10818854	rs10986063	0.9075	rs10993397	rs2584806	0.8994
							rs10818854	rs72037428	0.9075	rs10993397	rs28540393	0.8994
							rs10818854	rs7852921	0.9075	rs10993397	rs368138	0.8994
							rs10818854	rs59398032	0.9045	rs10993397	rs183066	0.8994
							rs10818854	rs10818860	0.9021	rs10993397	rs10732404	0.8954
							rs10818854	rs10818861	0.9021	rs10993397	rs68052018	0.8954
							rs10818854	rs12349006	0.9021	rs10993397	rs7851726	0.8954
							rs10818854	rs145950133	0.8909	rs10993397	rs943393	0.8954
							rs10818854	rs60518756	0.8874	rs10993397	rs7026071	0.8954
							rs10818854	rs10217167	0.8874	rs10993397	rs446540	0.8916
							rs10818854	rs10986072	0.8874	rs10993397	rs4744369	0.8876
							rs10818854	rs16926684	0.8874	rs10993397	rs10993463	0.8762
							rs10818854	rs10818844	0.8874	rs10993397	rs1016013	0.8724
							rs10818854	rs10818855	0.8844	rs10993397	rs10993370	0.7637
							rs10818854	rs10818856	0.8844	rs10993397	rs57109460	0.7267
							rs10818854	rs12236170	0.8844	rs10993397	rs4744370	0.7112
							rs10818854	rs10818850	0.8709	rs10993397	rs72746564	0.6828
							rs10818854	rs7047006	0.8549	rs10993397	rs4744412	0.6568
							rs10818854	rs10818843	0.8509	rs10993397	rs12344211	0.6568
							rs10818854	rs2416909	0.8509	rs10993397	rs9802263	0.6568
							rs10818854	rs10986061	0.8509	rs10993397	rs7019822	0.6543
							rs10818854	rs10818841	0.8509	rs10993397	rs12338409	0.6541
							rs10818854	rs2115615	0.8509	rs10993397	rs35234682	0.6539
							rs10818854	rs2163054	0.8509	rs10993397	rs9299428	0.6529
							rs10818854	rs78657246	0.8509	rs10993397	rs4743974	0.6424
							rs10818854	rs10818838	0.8509	rs10993397	rs10081676	0.6412
							rs10818854	rs10986053	0.8509	rs10993397	rs10821410	0.6412
							rs10818854	rs10115339	0.8509	rs10993397	rs10993387	0.6398
							rs10818854	rs7848680	0.8509	rs10993397	rs7862219	0.6386
							rs10818854	rs7868933	0.8509	rs10993397	rs10761361	0.6386
							rs10818854	rs73580119	0.8395	rs10993397	rs10217143	0.6373
							rs10818854	rs10986055	0.835	rs10993397	rs12338859	0.621
							rs10818854	rs10986050	0.835	rs10993397	rs12347649	0.621
							rs10818854	rs76977039	0.831	rs10993397	rs1867102	0.6194
							rs10818854	rs77688363	0.831	rs10993397	rs356665	0.6137
							rs10818854	rs9657674	0.7913	rs10993397	rs9696545	0.6117
							rs10818854	rs12335550	0.7913	rs10993397	rs4460442	0.5987
							rs10818854	rs60138981	0.7913	rs10993397	rs10761370	0.5977
							rs10818854	rs78062643	0.7913	rs10993397	rs7870160	0.5942
							rs10818854	rs28482775	0.7014	rs10993397	rs10993366	0.5905
							rs10818854	rs12349842	0.6835	rs10993397	rs4744386	0.5881
							rs10818854	rs7871219	0.6664	rs10993397	rs4743969	0.5881
							rs10818854	rs10986094	0.6664	rs10993397	rs10821404	0.5881
							rs10818854	rs10818866	0.6664	rs10993397	rs7047928	0.5881
							rs10818854	rs10818867	0.6664	rs10993397	rs10821398	0.5881
							rs10818854	rs547746029	0.6647	rs10993397	rs4744375	0.5881
							rs10818854	rs10986096	0.6501	rs10993397	rs11788697	0.5832
							rs10818854	rs10986098	0.6501	rs10993397	rs2031698	0.5832
							rs10818854	rs7857605	0.6501	rs10993397	rs10739983	0.5832
							rs10818854	rs7857992	0.6501	rs10993397	rs10821393	0.5832
							rs10818854	rs5900586	0.6501	rs10993397	rs7027708	0.5832
							rs10818854	rs12003663	0.6501	rs10993397	rs10821392	0.5832
							rs10818854	rs10986100	0.6501	rs10993397	rs10761351	0.5808
							rs10818854	rs12237501	0.6196	rs10993397	rs7848139	0.5808
							rs10818854	rs10818869	0.6196	rs10993397	rs7847277	0.5744
							rs10818854	rs10818868	0.6054	rs10993397	rs10821413	0.5685
							rs10818854	rs7848148	0.5983	rs10993397	rs10739982	0.5657
							rs10818854	rs12345067	0.5983	rs10993397	rs3840741	0.5635
							rs10818854	rs199669741	0.5959	rs10993397	rs7022894	0.5585
							rs10818854	rs12338104	0.5786	rs10993397	rs35242454	0.5585
							rs10818854	rs10986102	0.5786	rs10993397	rs4744390	0.5581
							rs10818854	rs10986103	0.566	rs10993397	rs62578968	0.543
							rs10818854	rs10818871	0.566	rs10993397	rs145503419	0.5419
							rs10818854	rs10986105	0.566	rs10993397	rs10993344	0.5257
							rs10818854	rs10081673	0.566	rs10993397	rs10821390	0.522
							rs10818854	rs3945629	0.566	rs10993397	rs56020612	0.5033
							rs10818854	rs10818872	0.566	rs11031006	rs11031006	1
							rs10818854	rs10818870	0.5597	rs11031006	rs11031005	0.9918
							rs10818854	rs10818858	0.5492	rs11031006	rs11031002	0.8397
							rs10818854	rs57183663	0.5423	rs11031006	rs74485684	0.8277
							rs10818854	rs73580042	0.5423	rs11031006	rs75525300	0.8277
							rs10818854	rs7852296	0.5352	rs11031006	rs12278989	0.8277
							rs10818854	rs10818859	0.5324	rs11031006	rs11031040	0.8277
							rs10818854	rs7027071	0.5186	rs11031006	rs12271187	0.8277
							rs10818854	rs10986042	0.5186	rs11031006	rs12271300	0.8277
							rs10818854	rs12345195	0.5186	rs11031006	rs10835649	0.8277
							rs10818854	rs61193313	0.5186	rs11031006	rs4071563	0.8277
							rs10818854	rs10986040	0.5186	rs11031006	rs11031047	0.8277
							rs10818854	rs59933209	0.5186	rs11031006	rs7947350	0.8277
							rs10818854	rs748994	0.5119	rs11031006	rs12363824	0.8277
							rs2479106	rs2479106	1	rs11031006	rs6484479	0.8277
							rs2479106	rs1778900	0.9609	rs11031006	rs3858429	0.8277
							rs2479106	rs1627536	0.9607	rs11031006	rs4071558	0.8277
							rs2479106	rs10556442	0.9475	rs11031006	rs4071559	0.8277
							rs2479106	rs7868740	0.8702	rs11031006	rs10616649	0.8277
							rs2479106	rs10441755	0.8405	rs11031006	rs7929660	0.8217
							rs2479106	rs10441754	0.8405	rs11031006	rs902156529	0.7574
							rs2479106	rs10818864	0.8225	rs11031006	rs11031010	0.6794
							rs2479106	rs7850870	0.8088	rs11031006	rs12364889	0.6794
							rs2479106	rs7850520	0.8088	rs11031006	rs11031033	0.6794
							rs2479106	rs10986093	0.8036	rs11031006	rs11031034	0.6794
							rs2479106	rs5900587	0.8034	rs11031006	rs11031035	0.6794
							rs2479106	rs2768819	0.783	rs11031006	rs4120817	0.6794
							rs2479106	rs1752169	0.7769	rs11031006	rs201518807	0.6794
							rs2479106	rs2458490	0.7769	rs11031006	rs10835644	0.6794
							rs2479106	rs2536951	0.7644	rs11031006	rs10835645	0.6794
							rs2479106	rs7864135	0.761	rs11031006	rs10835646	0.6794
							rs2479106	rs2670139	0.7581	rs11031006	rs12281078	0.6794
							rs2479106	rs147227319	0.757	rs11031006	rs12294258	0.6794
							rs2479106	rs7026674	0.7548	rs11031006	rs11031039	0.6794
							rs2479106	rs10818865	0.734	rs11031006	rs7123626	0.6794
							rs2479106	rs2479102	0.7338	rs11031006	rs12361594	0.6794
							rs2479106	rs12000791	0.7323	rs11031006	rs1947381630	0.6794
							rs2479106	rs4838074	0.7261	rs11031006	rs201665959	0.6794
							rs2479106	rs4391495	0.718	rs11031006	rs10835638	0.6735
							rs2479106	rs4097500	0.7134	rs11031006	rs7118949	0.6718
							rs2479106	rs12237685	0.7034	rs11031006	rs7121963	0.6718
							rs2479106	rs10760297	0.6861	rs11031006	rs7122449	0.6718
							rs2479106	rs10760296	0.6861	rs11031006	rs11512201	0.6718
							rs2479106	rs12336857	0.675	rs11031006	rs10835655	0.6718
							rs2479106	rs10986088	0.6475	rs11031006	rs12272134	0.6718
							rs2479106	rs7852243	0.6475	rs11031006	rs12278112	0.6718
							rs2479106	rs6478629	0.6349	rs11031006	rs141402489	0.6718
							rs2479106	rs12347057	0.6267	rs11031006	rs11031052	0.6718
							rs2479106	chr9:126573037	0.6245	rs11031006	rs7926666	0.6718
							rs2479106	rs10760295	0.6208	rs11031006	rs12285277	0.6718
							rs2479106	rs4836939	0.6168	rs11031006	rs11031056	0.6718
							rs2479106	rs16926721	0.6168	rs11031006	rs150144809	0.6718
							rs2479106	rs7857068	0.6149	rs11031006	rs12365913	0.6718
							rs2479106	rs7849665	0.6148	rs11031006	rs10835658	0.6718
							rs2479106	rs1857393	0.6105	rs11031006	rs12363432	0.6718
							rs2479106	rs879070	0.6071	rs11031006	rs74331022	0.6718
							rs2479106	rs6415840	0.6071	rs11031006	rs12278547	0.6659
							rs2479106	rs34308160	0.6037	rs11031006	rs7116893	0.6642
							rs2479106	rs913783	0.6033	rs11031006	rs7117691	0.6642
							rs2479106	rs1928482	0.5995	rs11031006	rs369574340	0.6621
							rs2479106	rs1975063	0.5954	rs11031006	rs67286303	0.6435
							rs2479106	rs10986139	0.5806	rs11031006	rs7949790	0.612
							rs2479106	rs10818851	0.572	rs11031006	rs11031058	0.612
							rs2479106	rs7041880	0.5683	rs11031006	rs76959488	0.612
							rs2479106	rs1975064	0.5683	rs11031006	rs10835660	0.612
							rs2479106	rs2109921	0.5648	rs11031006	rs10835661	0.5521
							rs2479106	rs6478626	0.5646	rs11031006	rs12294104	0.5476
							rs2479106	rs1475526	0.5609	rs11031006	rs12223987	0.5361
							rs2479106	rs5900582	0.5588	rs12478601	rs12478601	1
							rs2479106	rs10283413	0.5531	rs12478601	rs6751622	0.9596
							rs2479106	rs10124888	0.5527	rs12478601	rs999949	0.9556
							rs2479106	rs1475528	0.5521	rs12478601	rs6544661	0.9517
							rs2479106	rs10818852	0.55	rs12478601	rs6746064	0.9321
							rs2479106	rs112126578	0.5487	rs12478601	rs10186921	0.9318
							rs2479106	rs2799463	0.5449	rs12478601	rs12712881	0.9158
							rs2479106	rs60576432	0.5425	rs12478601	rs10645834	0.9042
							rs2479106	rs7034451	0.5425	rs12478601	rs11896747	0.8885
							rs2479106	rs7044843	0.5425	rs12478601	rs13032919	0.8779
							rs2479106	rs113881455	0.5425	rs12478601	rs145706702	0.8769
							rs2479106	rs9802408	0.5425	rs12478601	rs6761913	0.8751
							rs2479106	rs10118767	0.5394	rs12478601	rs7559891	0.8695
							rs2479106	rs1752156	0.532	rs12478601	rs6544660	0.8691
							rs2479106	rs7857196	0.5318	rs12478601	rs1472100	0.8629
							rs2479106	rs1752167	0.5313	rs12478601	rs74343467	0.829
							rs2479106	rs139038554	0.5313	rs12478601	rs6544659	0.8254
							rs2479106	rs9785285	0.5257	rs12478601	rs6544671	0.8251
							rs2479106	rs1778890	0.5257	rs12478601	rs11888640	0.8233
							rs2479106	rs1752161	0.5196	rs12478601	rs11899260	0.8078
							rs2479106	rs61709188	0.5134	rs12478601	rs12990177	0.7937
							rs2479106	rs7860055	0.513	rs12478601	rs1807866	0.7925
							rs2479106	rs67314832	0.5124	rs12478601	rs10182489	0.7906
							rs2479106	rs60275050	0.5084	rs12478601	rs7558302	0.7854
							rs2479106	rs10117940	0.5075	rs12478601	rs10650807	0.7822
							rs2479106	rs2159793	0.507	rs12478601	rs11901691	0.7772
							rs2479106	rs6478627	0.5062	rs12478601	rs11124930	0.6195
							rs2479106	rs1475527	0.5021	rs12478601	rs6544644	0.612
							rs2479106	rs12002687	0.5015	rs12478601	rs34640832	0.6103
							rs2374551	rs2374551	1	rs12478601	rs6716620	0.6008
							rs2374551	rs970176	0.9897	rs12478601	rs6146742	0.6008
							rs2374551	rs1158411	0.9795	rs12478601	rs6544654	0.5997
							rs2374551	rs6730741	0.9795	rs12478601	rs13423972	0.5756
							rs2374551	rs881476	0.9745	rs12478601	rs1038822	0.5377
							rs2374551	rs881477	0.9745	rs12478601	rs7567607	0.507
							rs2374551	rs6712861	0.9745	rs12478601	rs7568365	0.5051
							rs2374551	rs6756710	0.9745	rs12478601	rs7582497	0.5043
							rs2374551	rs6738189	0.9744	rs2349415	rs2349415	1
							rs2374551	rs13000971	0.9744	rs2349415	rs3788981	0.7849
							rs2374551	rs11899823	0.9696	rs2349415	rs12617250	0.7816
							rs2374551	rs150227913	0.9696	rs2349415	rs139899211	0.7804
							rs2374551	rs12477928	0.9696	rs2349415	rs13004711	0.7783
							rs2374551	rs12477964	0.9696	rs2349415	rs3827492	0.6901
							rs2374551	rs11884742	0.9694	rs2349415	rs10171892	0.6706
							rs2374551	rs1873556	0.9694	rs2349415	rs9807991	0.652
							rs2374551	rs1873558	0.9693	rs2349415	rs9309157	0.652
							rs2374551	rs10164789	0.9693	rs2349415	rs1504187	0.6479
							rs2374551	rs6725776	0.9693	rs2349415	rs35549654	0.6299
							rs2374551	rs57477603	0.9693	rs2349415	rs10865238	0.6096
							rs2374551	rs6731009	0.9647	rs2349415	rs11125196	0.6096
							rs2374551	rs13021894	0.9647	rs2349415	rs34168636	0.6068
							rs2374551	rs12470831	0.9645	rs2349415	rs3850344	0.5852
							rs2374551	rs9973398	0.9644	rs2349415	rs3913665	0.5834
							rs2374551	rs1873555	0.9644	rs2349415	rs2134811	0.5609
							rs2374551	rs150495967	0.9644	rs2349415	rs34014225	0.5597
							rs2374551	rs7599137	0.9644	rs2349415	rs12614817	0.507
							rs2374551	rs7583837	0.9644	rs4385527	rs4385527	1
							rs2374551	rs59669565	0.9643	rs4385527	rs11787821	0.9958
							rs2374551	rs11903287	0.9643	rs4385527	rs4744403	0.9958
							rs2374551	rs6730500	0.9643	rs4385527	rs10993377	0.9834
							rs2374551	rs34512555	0.9643	rs4385527	rs10993372	0.9629
							rs2374551	rs1873557	0.9643	rs4385527	rs10993365	0.9629
							rs2374551	rs2888875	0.9643	rs4385527	rs140564406	0.9629
							rs2374551	rs6544672	0.9643	rs4385527	rs10821401	0.9629
							rs2374551	rs6730316	0.9643	rs4385527	rs4744378	0.9629
							rs2374551	rs4337518	0.9643	rs4385527	rs391784	0.9629
							rs2374551	rs6726014	0.9642	rs4385527	rs35102751	0.9588
							rs2374551	rs6754878	0.9642	rs4385527	rs1751434	0.9548
							rs2374551	rs6754589	0.9642	rs4385527	rs2584806	0.9548
							rs2374551	rs10165527	0.9642	rs4385527	rs28540393	0.9548
							rs2374551	rs17031028	0.9642	rs4385527	rs368138	0.9548
							rs2374551	rs7596052	0.9642	rs4385527	rs183066	0.9548
							rs2374551	rs11898207	0.9596	rs4385527	rs10732404	0.9507
							rs2374551	rs17031065	0.9596	rs4385527	rs68052018	0.9507
							rs2374551	rs11888482	0.9593	rs4385527	rs7851726	0.9507
							rs2374551	rs56304210	0.9593	rs4385527	rs943393	0.9507
							rs2374551	rs2011979	0.9592	rs4385527	rs7026071	0.9507
							rs2374551	rs3042329	0.9592	rs4385527	rs2183958	0.9474
							rs2374551	rs141311393	0.9545	rs4385527	rs446540	0.9467
							rs2374551	rs74776407	0.9545	rs4385527	rs12235316	0.9431
							rs2374551	rs76896890	0.9545	rs4385527	rs10993394	0.9431
							rs2374551	rs12990267	0.9545	rs4385527	rs10993397	0.9431
							rs2374551	rs11884565	0.9542	rs4385527	rs10993398	0.9431
							rs2374551	rs10211106	0.9542	rs4385527	rs7865239	0.9386
							rs2374551	rs6544670	0.9542	rs4385527	rs10993418	0.9386
							rs2374551	rs78870521	0.9496	rs4385527	rs7853195	0.9351
							rs2374551	rs7578245	0.9445	rs4385527	rs4744411	0.9351
							rs2374551	rs112438660	0.9443	rs4385527	rs1123534	0.931
							rs2374551	rs147196397	0.9394	rs4385527	rs10821415	0.9269
							rs2374551	rs12466030	0.9392	rs4385527	rs7864171	0.9269
							rs2374551	rs34154601	0.939	rs4385527	rs1016013	0.9266
							rs2374551	rs6705356	0.939	rs4385527	rs35487382	0.9114
							rs2374551	rs199721109	0.9348	rs4385527	rs356131	0.9114
							rs2374551	rs6758733	0.934	rs4385527	rs356141	0.9038
							rs2374551	rs6742108	0.934	rs4385527	rs7019720	0.9038
							rs2374551	rs35645305	0.929	rs4385527	rs7866848	0.9
							rs2374551	rs146866240	0.929	rs4385527	rs10993463	0.8987
							rs2374551	rs35319517	0.924	rs4385527	rs414253	0.8959
							rs2374551	rs74659914	0.9191	rs4385527	rs406654	0.8959
							rs2374551	rs17031056	0.919	rs4385527	rs4744369	0.8636
							rs2374551	rs11890152	0.9159	rs4385527	rs10993370	0.8163
							rs2374551	rs11443399	0.9148	rs4385527	rs72746564	0.7283
							rs2374551	rs6739345	0.9142	rs4385527	rs4744370	0.6931
							rs2374551	rs201795193	0.9091	rs4385527	rs57109460	0.6815
							rs2374551	rs6544674	0.9048	rs4385527	rs9299428	0.6748
							rs2374551	rs11904510	0.8993	rs4385527	rs35234682	0.6574
							rs2374551	rs79732325	0.8943	rs4385527	rs9696545	0.6559
							rs2374551	rs71410186	0.8943	rs4385527	rs7019822	0.644
							rs2374551	rs4952992	0.89	rs4385527	rs4460442	0.6424
							rs2374551	rs12052942	0.8896	rs4385527	rs10821410	0.6266
							rs2374551	rs17031097	0.8896	rs4385527	rs10081676	0.6266
							rs2374551	rs35899859	0.8846	rs4385527	rs7862219	0.6241
							rs2374551	rs17031100	0.8846	rs4385527	rs10761361	0.6241
							rs2374551	rs17031102	0.8799	rs4385527	rs10217143	0.6227
							rs2374551	rs34925018	0.8797	rs4385527	rs10993387	0.6187
							rs2374551	rs148527005	0.8795	rs4385527	rs4744412	0.6159
							rs2374551	rs144688207	0.8747	rs4385527	rs12344211	0.6159
							rs2374551	rs66702817	0.8669	rs4385527	rs9802263	0.6159
							rs2374551	rs142959198	0.8503	rs4385527	rs12338409	0.6134
							rs2374551	rs1807866	0.8492	rs4385527	rs1867102	0.605
							rs2374551	rs10650807	0.8431	rs4385527	rs4743974	0.6021
							rs2374551	rs1472100	0.839	rs4385527	rs12347649	0.6006
							rs2374551	rs3752355	0.838	rs4385527	rs12338859	0.6006
							rs2374551	rs74343467	0.838	rs4385527	rs4744390	0.598
							rs2374551	rs1491508	0.8376	rs4385527	rs62578968	0.5822
							rs2374551	rs13013639	0.8372	rs4385527	rs145503419	0.5811
							rs2374551	rs7600872	0.834	rs4385527	rs356665	0.5788
							rs2374551	rs6544671	0.834	rs4385527	rs10993366	0.5766
							rs2374551	rs13016288	0.8331	rs4385527	rs4744386	0.5742
							rs2374551	rs59470270	0.8327	rs4385527	rs4743969	0.5742
							rs2374551	rs13032919	0.829	rs4385527	rs10821404	0.5742
							rs2374551	rs11899260	0.8249	rs4385527	rs7047928	0.5742
							rs2374551	rs11888640	0.8249	rs4385527	rs10821398	0.5742
							rs2374551	rs72613902	0.8223	rs4385527	rs4744375	0.5742
							rs2374551	rs4146253	0.8189	rs4385527	rs11788697	0.5695
							rs2374551	rs17031110	0.8119	rs4385527	rs2031698	0.5695
							rs2374551	rs34717327	0.8112	rs4385527	rs10739983	0.5695
							rs2374551	rs10179648	0.8099	rs4385527	rs10821393	0.5695
							rs2374551	rs13022691	0.8076	rs4385527	rs7027708	0.5695
							rs2374551	rs145706702	0.8052	rs4385527	rs10821392	0.5695
							rs2374551	rs57758828	0.7986	rs4385527	rs10761351	0.5672
							rs2374551	rs6544673	0.7985	rs4385527	rs7848139	0.5672
							rs2374551	rs6744642	0.7981	rs4385527	rs7847277	0.5605
							rs2374551	rs17031112	0.7977	rs4385527	rs10761370	0.5585
							rs2374551	rs10865192	0.7918	rs4385527	rs7870160	0.5563
							rs2374551	rs7605725	0.7779	rs4385527	rs10739982	0.5526
							rs2374551	rs34461850	0.7761	rs4385527	rs10821413	0.5499
							rs2374551	rs7563876	0.7742	rs4385527	rs3840741	0.5498
							rs2374551	rs10200833	0.7736	rs4385527	rs7022894	0.5447
							rs2374551	rs11429002	0.7716	rs4385527	rs35242454	0.5447
							rs2374551	rs11896747	0.7687	rs4385527	rs56020612	0.5205
							rs2374551	rs67193054	0.7648	rs4385527	rs62560524	0.5144
							rs2374551	rs4952990	0.7647	rs4385527	rs10993344	0.5136
							rs2374551	rs7559891	0.7637	rs4385527	rs10821390	0.5099
							rs2374551	rs12478601	0.7602	rs1894116	rs1894116	1
							rs2374551	rs1038822	0.7539	rs1894116	rs11225161	1
							rs2374551	rs999949	0.7381	rs1894116	rs10501995	1
							rs2374551	rs6751622	0.732	rs1894116	rs11225159	1
							rs2374551	rs6746064	0.7287	rs1894116	rs112289957	1
							rs2374551	rs6544661	0.7274	rs1894116	rs11225158	1
							rs2374551	rs13423972	0.7272	rs1894116	rs76406964	1
							rs2374551	rs6761913	0.7168	rs1894116	rs150723170	0.9858
							rs2374551	rs6544660	0.7116	rs1894116	rs28438856	0.9712
							rs2374551	rs35186748	0.7115	rs1894116	rs78191400	0.9325
							rs2374551	rs12990177	0.7083	rs1894116	rs11225168	0.9325
							rs2374551	rs34859017	0.7053	rs1894116	rs7925543	0.92
							rs2374551	rs7355361	0.7024	rs1894116	rs11225166	0.92
							rs2374551	rs10186921	0.6999	rs1894116	rs1365326	0.9056
							rs2374551	rs7591218	0.6998	rs1894116	rs11225154	0.8914
							rs2374551	rs12712881	0.6942	rs1894116	rs77651990	0.8611
							rs2374551	rs7582497	0.6926	rs1894116	rs143172150	0.8611
							rs2374551	rs7568365	0.6926	rs1894116	rs61893623	0.8611
							rs2374551	rs7567607	0.6926	rs1894116	rs1378335	0.8469
							rs2374551	rs11891936	0.6919	rs1894116	rs35637490	0.7643
							rs2374551	rs6544659	0.6914	rs1894116	rs2604529	0.7643
							rs2374551	rs10182489	0.6891	rs1894116	rs11378969	0.7504
							rs2374551	rs6544644	0.6879	rs1894116	rs111520626	0.6763
							rs2374551	rs34549634	0.6828	rs1894116	rs11225138	0.5277
							rs2374551	rs13017478	0.6827	rs705702	rs705702	1
							rs2374551	rs10176241	0.6813	rs705702	rs772920	0.9955
							rs2374551	rs17030684	0.6786	rs705702	rs705698	0.9774
							rs2374551	rs7569721	0.6774	rs705702	rs61937249	0.9774
							rs2374551	rs871852	0.6762	rs705702	rs61937248	0.9774
							rs2374551	rs12185704	0.6739	rs705702	rs61937247	0.9774
							rs2374551	rs7563201	0.646	rs705702	rs2048036	0.9774
							rs2374551	rs7589428	0.6448	rs705702	rs773112	0.9774
							rs2374551	rs11693801	0.6414	rs705702	rs773111	0.9774
							rs2374551	rs11900952	0.6391	rs705702	rs773110	0.9774
							rs2374551	rs6719534	0.6367	rs705702	rs773109	0.9774
							rs2374551	rs6544641	0.6352	rs705702	rs773108	0.9774
							rs2374551	rs6544640	0.6352	rs705702	rs773107	0.9729
							rs2374551	rs34513683	0.6313	rs705702	rs11343216	0.9464
							rs2374551	rs6712163	0.6311	rs705702	rs772921	0.8988
							rs2374551	rs6544638	0.6311	rs705702	rs2456973	0.8988
							rs2374551	rs7575635	0.6261	rs705702	rs34415530	0.8988
							rs2374551	rs35043804	0.6226	rs705702	rs10876866	0.8988
							rs2374551	rs7561670	0.6218	rs705702	rs1702877	0.8985
							rs2374551	rs151205804	0.6188	rs705702	rs1689510	0.8947
							rs2374551	rs6708167	0.6174	rs705702	rs1701704	0.8944
							rs2374551	rs11124930	0.6138	rs705702	rs34813703	0.8944
							rs2374551	rs7580013	0.6133	rs705702	rs705704	0.8944
							rs2374551	rs6730757	0.6101	rs705702	rs705705	0.8944
							rs2374551	rs35267248	0.6099	rs705702	rs61938962	0.8944
							rs2374551	rs13026309	0.6095	rs705702	rs61938963	0.8944
							rs2374551	rs1465618	0.5962	rs705702	rs141490969	0.8944
							rs2374551	rs6749927	0.5914	rs705702	rs7302200	0.89
							rs2374551	rs11897732	0.5881	rs705702	rs61555617	0.878
							rs2374551	rs6714624	0.5875	rs705702	rs2640564	0.8736
							rs2374551	rs34640832	0.5873	rs705702	rs2640562	0.862
							rs2374551	rs7558302	0.5845	rs705702	rs7955865	0.8169
							rs2374551	rs7595299	0.5757	rs705702	rs3741499	0.8125
							rs2374551	rs12468394	0.5743	rs705702	rs4759229	0.8125
							rs2374551	rs72613901	0.5624	rs705702	rs705696	0.7997
							rs2374551	rs13417665	0.5576	rs705702	rs36159461	0.7981
							rs2374551	rs13429458	0.5533	rs705702	rs877636	0.7921
							rs2374551	rs7599564	0.5527	rs705702	rs2292239	0.7916
							rs2374551	rs7572765	0.5441	rs705702	rs705700	0.7288
							rs2374551	rs535503344	0.5414	rs705702	rs1081975	0.7288
							rs2374551	rs72613900	0.5411	rs705702	rs705699	0.7217
							rs2374551	rs72616903	0.5407	rs705702	rs1873914	0.7113
							rs2374551	rs6749108	0.5372	rs705702	rs773114	0.7083
							rs2374551	rs13402827	0.5366	rs705702	rs773125	0.6954
							rs2374551	rs13030651	0.5229	rs705702	rs35830890	0.6711
							rs2374551	rs72613899	0.5136	rs705702	rs10876864	0.6315
							rs2374551	rs4340576	0.503	rs705702	rs1131017	0.6247
							rs10986105	rs10986105	1	rs705702	rs7297175	0.5899
							rs10986105	rs10818871	1	rs705702	rs11171739	0.5822
							rs10986105	rs10081673	1	rs705702	rs2271194	0.5711
							rs10986105	rs3945629	1	rs705702	rs10876870	0.5711
							rs10986105	rs10986103	1	rs705702	rs7971751	0.5711
							rs10986105	rs10818872	1	rs705702	rs4622308	0.5109
							rs10986105	rs73580042	0.9595	rs705702	rs7312770	0.5092
							rs10986105	rs10986102	0.9374	rs705702	rs4759228	0.5029
							rs10986105	rs12338104	0.9374	rs7563201	rs7563201	1
							rs10986105	rs10818870	0.9165	rs7563201	rs7589428	0.9647
							rs10986105	rs10818869	0.9162	rs2178575	rs2178575	1
							rs10986105	rs12237501	0.9162	rs2178575	rs7573568	1
							rs10986105	rs10818868	0.8956	rs2178575	rs6435709	1
							rs10986105	rs10818867	0.8538	rs2178575	rs6435708	1
							rs10986105	rs10818866	0.8538	rs2178575	rs6761143	1
							rs10986105	rs10986100	0.8332	rs2178575	rs16848753	1
							rs10986105	rs12003663	0.8332	rs2178575	rs1351593	1
							rs10986105	rs5900586	0.8332	rs2178575	rs35269142	1
							rs10986105	rs7857992	0.8332	rs2178575	rs7598042	1
							rs10986105	rs7857605	0.8332	rs2178575	rs7571642	1
							rs10986105	rs10986098	0.8332	rs2178575	rs7561571	1
							rs10986105	rs10986096	0.8332	rs2178575	rs6724920	1
							rs10986105	rs12349842	0.833	rs2178575	rs2178576	0.9929
							rs10986105	rs10986094	0.8125	rs2178575	rs2128323	0.9929
							rs10986105	rs7871219	0.8125	rs2178575	rs6745293	0.9323
							rs10986105	rs28482775	0.8124	rs2178575	rs1351594	0.9323
							rs10986105	rs199669741	0.7722	rs2178575	rs5838339	0.9323
							rs10986105	rs1752168	0.7175	rs2178575	rs979125	0.9323
							rs10986105	rs57183663	0.6972	rs2178575	rs1947932	0.9259
							rs10986105	rs12349006	0.6496	rs2178575	rs4672648	0.9196
							rs10986105	rs10986104	0.6493	rs2178575	rs4233986	0.9196
							rs10986105	rs7861905	0.64	rs2178575	rs1351592	0.8278
							rs10986105	rs10818862	0.6299	rs2178575	rs13382807	0.8278
							rs10986105	rs201435453	0.6299	rs2178575	rs74690816	0.7324
							rs10986105	rs11386804	0.6215	rs2178575	rs77159266	0.6294
							rs10986105	rs10818861	0.617	rs2178575	rs116117160	0.6153
							rs10986105	rs10818860	0.617	rs2178575	rs112599092	0.6153
							rs10986105	rs12236170	0.6047	rs2178575	rs2128322	0.598
							rs10986105	rs10818856	0.6047	rs13164856	rs13164856	1
							rs10986105	rs10818855	0.6047	rs13164856	rs112125244	0.9388
							rs10986105	rs2148953	0.6031	rs13164856	rs10586626	0.8402
							rs10986105	rs3945628	0.6031	rs13164856	rs10072700	0.817
							rs10986105	rs4620350	0.5944	rs13164856	rs10035166	0.8125
							rs10986105	rs7851425	0.5892	rs13164856	rs368020909	0.8012
							rs10986105	rs10818854	0.566	rs13164856	rs13165038	0.7939
							rs10986105	rs73577291	0.566	rs13164856	rs3846731	0.7658
							rs10986105	rs12340067	0.566	rs13164856	rs7734334	0.7658
							rs10986105	rs10760294	0.566	rs13164856	rs7735073	0.7658
							rs10986105	rs7851094	0.5544	rs13164856	rs3846732	0.7658
							rs10986105	rs73580155	0.5544	rs13164856	rs11954400	0.7658
							rs10986105	rs10986079	0.5468	rs13164856	rs35935118	0.7658
							rs10986105	rs57299923	0.5432	rs13164856	rs10072571	0.7658
							rs10986105	rs58097039	0.5432	rs13164856	rs10065633	0.7658
							rs10986105	rs11430188	0.5432	rs13164856	rs11952031	0.7658
							rs10986105	rs2062647351	0.5432	rs13164856	rs6893937	0.7658
							rs10986105	rs2799465	0.5324	rs13164856	rs5871455	0.7658
							rs10986105	rs142581951	0.5271	rs13164856	rs839	0.7658
							rs10986105	rs12351438	0.512	rs13164856	rs2070730	0.7658
							rs10986105	rs10818847	0.512	rs13164856	rs7701588	0.7658
							rs10986105	rs10986063	0.512	rs13164856	rs2070728	0.7658
							rs10986105	rs72037428	0.512	rs13164856	rs2070727	0.7658
							rs10986105	rs7852921	0.512	rs13164856	rs10051145	0.7658
							rs10986105	rs59398032	0.5035	rs13164856	rs17848418	0.7658
							rs10986105	rs76977039	0.5035	rs13164856	rs10068129	0.7658
							rs10986105	rs77688363	0.5035	rs13164856	rs61175929	0.7658
							rs10986105	rs145950133	0.5023	rs13164856	rs10053046	0.7658
							rs11891936	rs11891936	1	rs13164856	rs34199964	0.7658
							rs11891936	rs12185704	0.9451	rs13164856	rs6873269	0.7623
							rs11891936	rs34549634	0.9451	rs13164856	rs6873426	0.7623
							rs11891936	rs13017478	0.9342	rs13164856	rs6894655	0.7623
							rs11891936	rs17030684	0.9184	rs13164856	rs2549004	0.7623
							rs11891936	rs6719534	0.8987	rs13164856	rs2549003	0.7623
							rs11891936	rs7575635	0.8757	rs13164856	rs2549002	0.7623
							rs11891936	rs7580013	0.8704	rs13164856	rs11958503	0.7612
							rs11891936	rs7561670	0.8704	rs13164856	rs2070726	0.7589
							rs11891936	rs6708167	0.8651	rs13164856	rs2070725	0.7589
							rs11891936	rs35267248	0.8556	rs13164856	rs10214312	0.7589
							rs11891936	rs11900952	0.8499	rs13164856	rs9282762	0.7589
							rs11891936	rs6544641	0.8453	rs13164856	rs2070724	0.7589
							rs11891936	rs6544640	0.8453	rs13164856	rs9282763	0.7589
							rs11891936	rs13026309	0.845	rs13164856	rs9282761	0.7589
							rs11891936	rs35043804	0.8317	rs13164856	rs2070723	0.7589
							rs11891936	rs6712163	0.8303	rs13164856	rs35829610	0.7589
							rs11891936	rs6544638	0.8303	rs13164856	rs2070722	0.7589
							rs11891936	rs72613902	0.8188	rs13164856	rs2548999	0.7589
							rs11891936	rs11429002	0.8144	rs13164856	rs2549007	0.7578
							rs11891936	rs6744642	0.8106	rs13164856	rs2706384	0.7578
							rs11891936	rs11897732	0.809	rs13164856	rs2706385	0.7555
							rs11891936	rs13013639	0.8069	rs13164856	rs2706386	0.7555
							rs11891936	rs7605725	0.8039	rs13164856	rs2070731	0.7521
							rs11891936	rs7595299	0.8036	rs13164856	rs960757	0.7487
							rs11891936	rs59470270	0.8027	rs13164856	rs2549009	0.7487
							rs11891936	rs4146253	0.7985	rs13164856	rs2549006	0.7487
							rs11891936	rs13016288	0.7943	rs13164856	rs2549005	0.7487
							rs11891936	rs10865192	0.7902	rs13164856	rs3840527	0.7487
							rs11891936	rs6714624	0.7901	rs13164856	rs13170412	0.7453
							rs11891936	rs6730757	0.7878	rs13164856	rs10213701	0.7453
							rs11891936	rs34859017	0.7851	rs13164856	rs2549001	0.7453
							rs11891936	rs6749927	0.7833	rs13164856	rs149527856	0.7441
							rs11891936	rs7563876	0.7821	rs13164856	rs2548997	0.7385
							rs11891936	rs10200833	0.7808	rs13164856	rs7719499	0.734
							rs11891936	rs4952990	0.7714	rs13164856	rs56680041	0.6299
							rs11891936	rs13022691	0.7622	rs804279	rs804279	1
							rs11891936	rs1491508	0.7608	rs804279	rs34928882	0.9504
							rs11891936	rs1465618	0.7552	rs804279	rs66510044	0.9405
							rs11891936	rs17031110	0.7441	rs804279	rs804274	0.9147
							rs11891936	rs72613899	0.7363	rs804279	rs8191514	0.777
							rs11891936	rs17031112	0.7313	rs804279	rs8191542	0.7726
							rs11891936	rs13030651	0.7294	rs804279	rs8191518	0.7681
							rs11891936	rs6742108	0.7282	rs804279	rs8191589	0.7677
							rs11891936	rs6758733	0.7282	rs804279	rs36018280	0.7537
							rs11891936	rs6761913	0.7278	rs804279	rs8191639	0.7127
							rs11891936	rs535503344	0.7242	rs804279	rs8191598	0.7126
							rs11891936	rs201795193	0.7242	rs804279	rs804292	0.6827
							rs11891936	rs146866240	0.7242	rs804279	rs804290	0.6701
							rs11891936	rs6705356	0.7242	rs804279	rs2645455	0.6663
							rs11891936	rs34154601	0.7242	rs804279	rs811966	0.6663
							rs11891936	rs17031056	0.7231	rs804279	rs804286	0.6663
							rs11891936	rs4337518	0.7203	rs804279	rs2740433	0.6537
							rs11891936	rs6730316	0.7203	rs804279	rs17153782	0.627
							rs11891936	rs6544672	0.7203	rs804279	rs884662	0.6088
							rs11891936	rs2888875	0.7203	rs10739076	rs10739076	1
							rs11891936	rs7599564	0.7202	rs7864171	rs7864171	1
							rs11891936	rs35319517	0.7191	rs7864171	rs1123534	0.9959
							rs11891936	rs2011979	0.7176	rs7864171	rs4744411	0.9918
							rs11891936	rs74659914	0.7163	rs7864171	rs7853195	0.9918
							rs11891936	rs3042329	0.7163	rs7864171	rs10821415	0.9917
							rs11891936	rs1873558	0.7163	rs7864171	rs10993398	0.9836
							rs11891936	rs35645305	0.7163	rs7864171	rs10993397	0.9836
							rs11891936	rs67193054	0.7142	rs7864171	rs10993394	0.9836
							rs11891936	rs6730500	0.7137	rs7864171	rs12235316	0.9836
							rs11891936	rs11903287	0.7137	rs7864171	rs7865239	0.9795
							rs11891936	rs6738189	0.7137	rs7864171	rs2183958	0.9633
							rs11891936	rs10211106	0.7137	rs7864171	rs4744403	0.9309
							rs11891936	rs11884565	0.7137	rs7864171	rs11787821	0.9309
							rs11891936	rs6739345	0.7124	rs7864171	rs4385527	0.9269
							rs11891936	rs7596052	0.7124	rs7864171	rs35487382	0.9192
							rs11891936	rs17031028	0.7124	rs7864171	rs356131	0.9192
							rs11891936	rs10165527	0.7124	rs7864171	rs10993418	0.9152
							rs11891936	rs6754589	0.7124	rs7864171	rs356141	0.9114
							rs11891936	rs6754878	0.7124	rs7864171	rs7019720	0.9114
							rs11891936	rs6726014	0.7124	rs7864171	rs10993377	0.911
							rs11891936	rs1873557	0.7112	rs7864171	rs7866848	0.9076
							rs11891936	rs10186921	0.7102	rs7864171	rs414253	0.9036
							rs11891936	rs12990177	0.7102	rs7864171	rs406654	0.9036
							rs11891936	rs12468394	0.7101	rs7864171	rs10993372	0.8914
							rs11891936	rs7572765	0.7098	rs7864171	rs10993365	0.8914
							rs11891936	rs56304210	0.7098	rs7864171	rs140564406	0.8914
							rs11891936	rs57477603	0.7085	rs7864171	rs10821401	0.8914
							rs11891936	rs6725776	0.7085	rs7864171	rs4744378	0.8914
							rs11891936	rs10164789	0.7085	rs7864171	rs391784	0.8914
							rs11891936	rs12470831	0.7073	rs7864171	rs35102751	0.8874
							rs11891936	rs1158411	0.7073	rs7864171	rs1751434	0.8835
							rs11891936	rs11884742	0.706	rs7864171	rs2584806	0.8835
							rs11891936	rs7583837	0.706	rs7864171	rs28540393	0.8835
							rs11891936	rs7599137	0.706	rs7864171	rs368138	0.8835
							rs11891936	rs150495967	0.706	rs7864171	rs183066	0.8835
							rs11891936	rs1873555	0.706	rs7864171	rs10732404	0.8796
							rs11891936	rs9973398	0.706	rs7864171	rs68052018	0.8796
							rs11891936	rs6756710	0.706	rs7864171	rs7851726	0.8796
							rs11891936	rs6712861	0.706	rs7864171	rs943393	0.8796
							rs11891936	rs881477	0.706	rs7864171	rs7026071	0.8796
							rs11891936	rs881476	0.706	rs7864171	rs4744369	0.8796
							rs11891936	rs112438660	0.706	rs7864171	rs10993463	0.8759
							rs11891936	rs7567607	0.7051	rs7864171	rs446540	0.8757
							rs11891936	rs7568365	0.7051	rs7864171	rs1016013	0.8643
							rs11891936	rs7582497	0.7051	rs7864171	rs10993370	0.7499
							rs11891936	rs12478601	0.7051	rs7864171	rs57109460	0.7273
							rs11891936	rs6544670	0.7047	rs7864171	rs4744370	0.7049
							rs11891936	rs13000971	0.7047	rs7864171	rs72746564	0.6672
							rs11891936	rs59669565	0.7047	rs7864171	rs9802263	0.6579
							rs11891936	rs17031065	0.7036	rs7864171	rs12344211	0.6579
							rs11891936	rs11898207	0.7036	rs7864171	rs4744412	0.6579
							rs11891936	rs150227913	0.7036	rs7864171	rs12338409	0.6553
							rs11891936	rs11899823	0.7036	rs7864171	rs7019822	0.6549
							rs11891936	rs12477928	0.7036	rs7864171	rs9299428	0.6468
							rs11891936	rs12477964	0.7036	rs7864171	rs4743974	0.6436
							rs11891936	rs147196397	0.7022	rs7864171	rs35234682	0.6417
							rs11891936	rs13417665	0.7016	rs7864171	rs10081676	0.6294
							rs11891936	rs71410186	0.7009	rs7864171	rs10821410	0.6294
							rs11891936	rs1873556	0.7008	rs7864171	rs10993387	0.6281
							rs11891936	rs970176	0.7008	rs7864171	rs7862219	0.6269
							rs11891936	rs6730741	0.7008	rs7864171	rs10761361	0.6269
							rs11891936	rs11888482	0.7008	rs7864171	rs10217143	0.6255
							rs11891936	rs6731009	0.6998	rs7864171	rs356665	0.6144
							rs11891936	rs13021894	0.6998	rs7864171	rs9696545	0.611
							rs11891936	rs12990267	0.6984	rs7864171	rs12338859	0.6095
							rs11891936	rs7578245	0.6984	rs7864171	rs12347649	0.6095
							rs11891936	rs76896890	0.6984	rs7864171	rs1867102	0.6078
							rs11891936	rs74776407	0.6984	rs7864171	rs10761370	0.5987
							rs11891936	rs141311393	0.6984	rs7864171	rs4460442	0.598
							rs11891936	rs13423972	0.6983	rs7864171	rs7870160	0.5956
							rs11891936	rs6749108	0.6981	rs7864171	rs10993366	0.5793
							rs11891936	rs6544660	0.698	rs7864171	rs4744386	0.5769
							rs11891936	rs13429458	0.6967	rs7864171	rs4743969	0.5769
							rs11891936	rs6751622	0.695	rs7864171	rs10821404	0.5769
							rs11891936	rs78870521	0.6947	rs7864171	rs7047928	0.5769
							rs11891936	rs34512555	0.6931	rs7864171	rs10821398	0.5769
							rs11891936	rs35899859	0.6931	rs7864171	rs4744375	0.5769
							rs11891936	rs17031100	0.6931	rs7864171	rs11788697	0.5721
							rs11891936	rs2374551	0.6919	rs7864171	rs2031698	0.5721
							rs11891936	rs79732325	0.6919	rs7864171	rs10739983	0.5721
							rs11891936	rs1038822	0.6916	rs7864171	rs10821393	0.5721
							rs11891936	rs199721109	0.6909	rs7864171	rs7027708	0.5721
							rs11891936	rs7569721	0.6897	rs7864171	rs10821392	0.5721
							rs11891936	rs12052942	0.6893	rs7864171	rs10761351	0.5697
							rs11891936	rs17031097	0.6893	rs7864171	rs7848139	0.5697
							rs11891936	rs17031102	0.6893	rs7864171	rs7847277	0.5632
							rs11891936	rs7591218	0.6883	rs7864171	rs7022894	0.5595
							rs11891936	rs34925018	0.688	rs7864171	rs35242454	0.5595
							rs11891936	rs871852	0.6879	rs7864171	rs10821413	0.5577
							rs11891936	rs7563201	0.6876	rs7864171	rs10739982	0.5548
							rs11891936	rs72613901	0.687	rs7864171	rs3840741	0.5525
							rs11891936	rs6544659	0.686	rs7864171	rs4744390	0.5493
							rs11891936	rs11890152	0.6851	rs7864171	rs62578968	0.5343
							rs11891936	rs999949	0.685	rs7864171	rs145503419	0.5332
							rs11891936	rs11443399	0.6807	rs7864171	rs10993344	0.5212
							rs11891936	rs6544644	0.6807	rs7864171	rs10821390	0.5116
							rs11891936	rs7589428	0.6791	rs7864171	rs56020612	0.501
							rs11891936	rs58839393	0.6775	rs9696009	rs9696009	1
							rs11891936	rs7559891	0.6766	rs9696009	rs12237146	1
							rs11891936	rs7355361	0.6753	rs9696009	rs16926913	1
							rs11891936	rs6544661	0.6753	rs9696009	rs12000707	1
							rs11891936	rs35186748	0.6744	rs9696009	rs7871250	0.9823
							rs11891936	rs12466030	0.6743	rs9696009	rs7042633	0.9823
							rs11891936	rs11693801	0.6739	rs9696009	rs7028482	0.9823
							rs11891936	rs11896747	0.6733	rs9696009	rs7030193	0.9823
							rs11891936	rs72613900	0.6723	rs9696009	rs10818873	0.9823
							rs11891936	rs6544674	0.6706	rs9696009	rs7861905	0.9472
							rs11891936	rs6746064	0.6689	rs9696009	rs10986104	0.9472
							rs11891936	rs13402827	0.6677	rs9696009	rs11386804	0.9472
							rs11891936	rs66702817	0.6647	rs9696009	rs4620350	0.9472
							rs11891936	rs10176241	0.6618	rs9696009	rs2148953	0.9472
							rs11891936	rs12712881	0.6586	rs9696009	rs3945628	0.9472
							rs11891936	rs148527005	0.649	rs9696009	rs370484144	0.8594
							rs11891936	rs4952992	0.6482	rs9696009	rs10818859	0.7682
							rs11891936	rs11904510	0.6478	rs9696009	rs10818858	0.7562
							rs11891936	rs745763	0.6386	rs9696009	rs138590098	0.5786
							rs11891936	rs144688207	0.6379	rs9696009	rs7033611	0.5786
							rs11891936	rs34640832	0.6342	rs9696009	rs73571775	0.5786
							rs11891936	rs7933	0.6319	rs9696009	rs111268219	0.5786
							rs11891936	rs4340576	0.6284	rs9696009	rs16926920	0.5786
							rs11891936	rs13032919	0.6257	rs9696009	rs10818884	0.5786
							rs11891936	rs11124930	0.6231	rs9696009	rs10818886	0.5786
							rs11891936	rs142959198	0.6206	rs9696009	rs10818881	0.5786
							rs11891936	rs74343467	0.6175	rs9696009	rs10818880	0.5786
							rs11891936	rs6544671	0.6144	rs9696009	rs10986121	0.5786
							rs11891936	rs7600872	0.6144	rs9696009	rs7048787	0.5786
							rs11891936	rs10650807	0.6144	rs9696009	rs10818879	0.5786
							rs11891936	rs1807866	0.6131	rs9696009	rs60631262	0.5786
							rs11891936	rs1472100	0.6112	rs9696009	rs10986117	0.5786
							rs11891936	rs3752355	0.6094	rs9696009	rs10818877	0.5786
							rs11891936	rs72616903	0.6072	rs9696009	rs10986115	0.5786
							rs11891936	rs11899260	0.6063	rs9696009	rs144516169	0.5786
							rs11891936	rs11888640	0.6063	rs9696009	rs10986111	0.5786
							rs11891936	rs10182489	0.5995	rs9696009	rs13439964	0.5786
							rs11891936	rs34461850	0.5979	rs9696009	rs2769938	0.5708
							rs11891936	rs10179648	0.5915	rs9696009	rs4836945	0.5708
							rs11891936	rs145706702	0.5911	rs9696009	rs10706071	0.5708
							rs11891936	rs34717327	0.5906	rs9696009	rs562239	0.5708
							rs11891936	rs57758828	0.5792	rs9696009	rs1927239	0.5708
							rs11891936	rs35111198	0.5655	rs9696009	rs2768817	0.5708
							rs11891936	rs6146742	0.5605	rs9696009	rs2768815	0.5708
							rs11891936	rs6716620	0.5605	rs9696009	rs2799468	0.5708
							rs11891936	rs200461608	0.5553	rs9696009	rs2799467	0.5708
							rs11891936	rs373745804	0.5553	rs9696009	rs2479104	0.5645
							rs11891936	rs59630430	0.5542	rs9696009	rs146230733	0.5611
							rs11891936	rs151205804	0.5435	rs9696009	rs1849501	0.5611
							rs11891936	rs6544673	0.5395	rs9696009	rs1508	0.5611
							rs11891936	rs6544654	0.533	rs9696009	rs10986124	0.5611
							rs11891936	rs7558302	0.5314	rs9696009	rs7857050	0.5611
							rs11891936	rs34513683	0.5173	rs9696009	rs10818878	0.5611
							rs6731009	rs6731009	1	rs9696009	rs10760299	0.5611
							rs6731009	rs13021894	1	rs9696009	rs10818887	0.5611
							rs6731009	rs12477928	0.9949	rs9696009	rs10986126	0.5611
							rs6731009	rs12477964	0.9949	rs9696009	rs7037349	0.5611
							rs6731009	rs11899823	0.9949	rs9696009	rs10818888	0.5611
							rs6731009	rs150227913	0.9949	rs9696009	rs10818889	0.5611
							rs6731009	rs11898207	0.9949	rs9696009	rs4289915	0.5611
							rs6731009	rs17031065	0.9949	rs9696009	rs137973238	0.5611
							rs6731009	rs12470831	0.9899	rs9696009	rs569675099	0.5611
							rs6731009	rs881476	0.9798	rs9696009	rs7042618	0.5611
							rs6731009	rs881477	0.9798	rs9696009	rs1122377	0.5611
							rs6731009	rs6712861	0.9798	rs9696009	rs10818874	0.5611
							rs6731009	rs6756710	0.9798	rs9696009	rs75727459	0.5611
							rs6731009	rs6730741	0.9748	rs9696009	rs11562302	0.5611
							rs6731009	rs11884565	0.9697	rs9696009	rs12337273	0.5611
							rs6731009	rs10211106	0.9697	rs9696009	rs12352489	0.5611
							rs6731009	rs6738189	0.9697	rs9696009	rs10986110	0.5611
							rs6731009	rs9973398	0.9697	rs9696009	rs73577782	0.5611
							rs6731009	rs1873555	0.9697	rs9696009	rs10818891	0.5611
							rs6731009	rs150495967	0.9697	rs9696009	rs10986107	0.5611
							rs6731009	rs7599137	0.9697	rs9696009	rs13294390	0.5611
							rs6731009	rs7583837	0.9697	rs9696009	rs10513424	0.5611
							rs6731009	rs2011979	0.9648	rs9696009	rs12000175	0.5611
							rs6731009	rs10164789	0.9648	rs9696009	rs73577788	0.5611
							rs6731009	rs2374551	0.9647	rs9696009	rs10986136	0.5611
							rs6731009	rs970176	0.9647	rs9696009	rs10986138	0.5611
							rs6731009	rs11888482	0.9647	rs9696009	rs12237678	0.5611
							rs6731009	rs1873556	0.9647	rs9696009	rs7872162	0.5611
							rs6731009	rs56304210	0.9647	rs9696009	rs6478632	0.5611
							rs6731009	rs59669565	0.9597	rs9696009	rs7859011	0.5445
							rs6731009	rs13000971	0.9597	rs9696009	rs117958717	0.544
							rs6731009	rs11903287	0.9597	rs9696009	rs10986128	0.544
							rs6731009	rs6730500	0.9597	rs9696009	rs10818872	0.544
							rs6731009	rs141311393	0.9597	rs9696009	rs3945629	0.544
							rs6731009	rs74776407	0.9597	rs9696009	rs10081673	0.544
							rs6731009	rs76896890	0.9597	rs9696009	rs10986105	0.544
							rs6731009	rs12990267	0.9597	rs9696009	rs10818871	0.544
							rs6731009	rs112438660	0.9597	rs9696009	rs10986103	0.544
							rs6731009	rs35645305	0.9548	rs9696009	rs73580042	0.544
							rs6731009	rs1158411	0.9548	rs9696009	rs12342029	0.544
							rs6731009	rs1873558	0.9548	rs9696009	rs12342129	0.544
							rs6731009	rs3042329	0.9548	rs9696009	rs12342178	0.544
							rs6731009	rs78870521	0.9547	rs9696009	rs12342185	0.544
							rs6731009	rs6725776	0.9547	rs9696009	rs10986140	0.544
							rs6731009	rs57477603	0.9547	rs9696009	rs10986102	0.544
							rs6731009	rs34512555	0.9499	rs9696009	rs10818895	0.544
							rs6731009	rs1873557	0.9499	rs9696009	rs7863362	0.544
							rs6731009	rs2888875	0.9499	rs9696009	rs10627839	0.544
							rs6731009	rs6544672	0.9499	rs9696009	rs7040925	0.544
							rs6731009	rs6730316	0.9499	rs9696009	rs6478633	0.544
							rs6731009	rs4337518	0.9499	rs9696009	rs10818870	0.544
							rs6731009	rs6726014	0.9497	rs9696009	rs11284206	0.544
							rs6731009	rs6754878	0.9497	rs9696009	rs6478634	0.544
							rs6731009	rs6754589	0.9497	rs9696009	rs1999046	0.544
							rs6731009	rs10165527	0.9497	rs9696009	rs12338104	0.544
							rs6731009	rs17031028	0.9497	rs9696009	rs10818869	0.544
							rs6731009	rs7596052	0.9497	rs9696009	rs12237501	0.544
							rs6731009	rs11443399	0.9497	rs9696009	rs10818868	0.544
							rs6731009	rs7578245	0.9497	rs9696009	rs10986100	0.544
							rs6731009	rs6544670	0.9497	rs9696009	rs12003663	0.544
							rs6731009	rs11884742	0.9449	rs9696009	rs10818867	0.544
							rs6731009	rs34154601	0.9449	rs9696009	rs10818866	0.544
							rs6731009	rs6705356	0.9449	rs9696009	rs5900586	0.544
							rs6731009	rs147196397	0.9447	rs9696009	rs10986147	0.5104
							rs6731009	rs199721109	0.9399	rs9696009	rs58097039	0.5104
							rs6731009	rs6544674	0.9398	rs11031005	rs11031005	1
							rs6731009	rs17031056	0.9351	rs11031005	rs11031006	0.9918
							rs6731009	rs146866240	0.9349	rs11031005	rs11031002	0.8306
							rs6731009	rs11890152	0.9305	rs11031005	rs74485684	0.8208
							rs6731009	rs35319517	0.93	rs11031005	rs75525300	0.8208
							rs6731009	rs6758733	0.93	rs11031005	rs12278989	0.8208
							rs6731009	rs6742108	0.93	rs11031005	rs11031040	0.8208
							rs6731009	rs12466030	0.9249	rs11031005	rs12271187	0.8208
							rs6731009	rs74659914	0.9249	rs11031005	rs12271300	0.8208
							rs6731009	rs6739345	0.92	rs11031005	rs10835649	0.8208
							rs6731009	rs201795193	0.9151	rs11031005	rs4071563	0.8208
							rs6731009	rs17031097	0.9151	rs11031005	rs11031047	0.8208
							rs6731009	rs35899859	0.9102	rs11031005	rs7947350	0.8208
							rs6731009	rs17031100	0.9102	rs11031005	rs12363824	0.8208
							rs6731009	rs11904510	0.9058	rs11031005	rs6484479	0.8208
							rs6731009	rs34925018	0.9053	rs11031005	rs3858429	0.8208
							rs6731009	rs12052942	0.9052	rs11031005	rs4071558	0.8208
							rs6731009	rs17031102	0.9052	rs11031005	rs4071559	0.8208
							rs6731009	rs71410186	0.9004	rs11031005	rs10616649	0.8208
							rs6731009	rs4952992	0.8957	rs11031005	rs7929660	0.8147
							rs6731009	rs66702817	0.8913	rs11031005	rs902156529	0.7508
							rs6731009	rs148527005	0.886	rs11031005	rs11031010	0.6718
							rs6731009	rs144688207	0.8809	rs11031005	rs12364889	0.6718
							rs6731009	rs79732325	0.8809	rs11031005	rs11031033	0.6718
							rs6731009	rs1807866	0.8711	rs11031005	rs11031034	0.6718
							rs6731009	rs10650807	0.8653	rs11031005	rs11031035	0.6718
							rs6731009	rs3752355	0.8603	rs11031005	rs4120817	0.6718
							rs6731009	rs142959198	0.8571	rs11031005	rs201518807	0.6718
							rs6731009	rs1472100	0.8429	rs11031005	rs10835644	0.6718
							rs6731009	rs74343467	0.842	rs11031005	rs10835645	0.6718
							rs6731009	rs7600872	0.8379	rs11031005	rs10835646	0.6718
							rs6731009	rs6544671	0.8379	rs11031005	rs12281078	0.6718
							rs6731009	rs1491508	0.834	rs11031005	rs12294258	0.6718
							rs6731009	rs13013639	0.8337	rs11031005	rs11031039	0.6718
							rs6731009	rs13032919	0.8329	rs11031005	rs7123626	0.6718
							rs6731009	rs13016288	0.8295	rs11031005	rs12361594	0.6718
							rs6731009	rs59470270	0.8292	rs11031005	rs1947381630	0.6718
							rs6731009	rs11899260	0.8289	rs11031005	rs201665959	0.6718
							rs6731009	rs11888640	0.8289	rs11031005	rs10835638	0.666
							rs6731009	rs17031110	0.8288	rs11031005	rs7118949	0.6642
							rs6731009	rs34717327	0.8258	rs11031005	rs7121963	0.6642
							rs6731009	rs17031112	0.8238	rs11031005	rs7122449	0.6642
							rs6731009	rs57758828	0.8198	rs11031005	rs11512201	0.6642
							rs6731009	rs72613902	0.8192	rs11031005	rs10835655	0.6642
							rs6731009	rs4146253	0.8154	rs11031005	rs12272134	0.6642
							rs6731009	rs145706702	0.8089	rs11031005	rs12278112	0.6642
							rs6731009	rs13022691	0.8037	rs11031005	rs141402489	0.6642
							rs6731009	rs6544673	0.7971	rs11031005	rs11031052	0.6642
							rs6731009	rs6744642	0.7955	rs11031005	rs7926666	0.6642
							rs6731009	rs10865192	0.7884	rs11031005	rs12285277	0.6642
							rs6731009	rs10179648	0.7875	rs11031005	rs11031056	0.6642
							rs6731009	rs7605725	0.7837	rs11031005	rs150144809	0.6642
							rs6731009	rs11896747	0.7809	rs11031005	rs12365913	0.6642
							rs6731009	rs7563876	0.7799	rs11031005	rs10835658	0.6642
							rs6731009	rs10200833	0.7794	rs11031005	rs12363432	0.6642
							rs6731009	rs7559891	0.776	rs11031005	rs74331022	0.6642
							rs6731009	rs67193054	0.7725	rs11031005	rs12278547	0.6584
							rs6731009	rs34461850	0.7712	rs11031005	rs7116893	0.6566
							rs6731009	rs11429002	0.7688	rs11031005	rs7117691	0.6566
							rs6731009	rs1038822	0.7663	rs11031005	rs369574340	0.6548
							rs6731009	rs12478601	0.7642	rs11031005	rs67286303	0.6362
							rs6731009	rs4952990	0.7615	rs11031005	rs7949790	0.6051
							rs6731009	rs999949	0.7419	rs11031005	rs11031058	0.6051
							rs6731009	rs6751622	0.7359	rs11031005	rs76959488	0.6051
							rs6731009	rs6746064	0.7322	rs11031005	rs10835660	0.6051
							rs6731009	rs13423972	0.7312	rs11031005	rs10835661	0.5455
							rs6731009	rs6544661	0.7227	rs11031005	rs12294104	0.5411
							rs6731009	rs6761913	0.7214	rs11031005	rs12223987	0.5296
							rs6731009	rs35186748	0.7185	rs11225154	rs11225154	1
							rs6731009	rs6544660	0.7159	rs11225154	rs28438856	0.9181
							rs6731009	rs34859017	0.7132	rs11225154	rs76406964	0.8914
							rs6731009	rs12990177	0.713	rs11225154	rs11225158	0.8914
							rs6731009	rs10186921	0.713	rs11225154	rs112289957	0.8914
							rs6731009	rs7591218	0.712	rs11225154	rs11225159	0.8914
							rs6731009	rs10182489	0.7102	rs11225154	rs10501995	0.8914
							rs6731009	rs7355361	0.7061	rs11225154	rs11225161	0.8914
							rs6731009	rs7582497	0.7051	rs11225154	rs1894116	0.8914
							rs6731009	rs7568365	0.7051	rs11225154	rs150723170	0.8785
							rs6731009	rs7567607	0.7051	rs11225154	rs78191400	0.8304
							rs6731009	rs11891936	0.6998	rs11225154	rs11225168	0.8304
							rs6731009	rs12712881	0.698	rs11225154	rs7925543	0.8191
							rs6731009	rs6544644	0.6926	rs11225154	rs11225166	0.8191
							rs6731009	rs13017478	0.691	rs11225154	rs1365326	0.8057
							rs6731009	rs34549634	0.691	rs11225154	rs77651990	0.7635
							rs6731009	rs7569721	0.6897	rs11225154	rs143172150	0.7635
							rs6731009	rs6544659	0.6875	rs11225154	rs61893623	0.7635
							rs6731009	rs17030684	0.6865	rs11225154	rs1378335	0.7502
							rs6731009	rs10176241	0.6851	rs11225154	rs35637490	0.6734
							rs6731009	rs12185704	0.6821	rs11225154	rs2604529	0.6734
							rs6731009	rs871852	0.6804	rs11225154	rs11378969	0.6603
							rs6731009	rs11693801	0.6544	rs11225154	rs111520626	0.6136
							rs6731009	rs7563201	0.6508	rs1784692	rs1784692	1
							rs6731009	rs7589428	0.6495	rs1784692	rs376592110	0.9801
							rs6731009	rs11900952	0.6473	rs1784692	rs1791800	0.9735
							rs6731009	rs6719534	0.6441	rs1784692	rs2735201	0.7632
							rs6731009	rs6544641	0.6432	rs1784692	rs1672716	0.7579
							rs6731009	rs6544640	0.6432	rs1784692	rs1614059	0.725
							rs6731009	rs6712163	0.639	rs1784692	rs1672692	0.7197
							rs6731009	rs6544638	0.639	rs1784692	rs3018331	0.7197
							rs6731009	rs151205804	0.6383	rs1784692	rs2846625	0.7144
							rs6731009	rs34513683	0.6344	rs1784692	rs2735198	0.7144
							rs6731009	rs7575635	0.6344	rs1784692	rs1791804	0.7144
							rs6731009	rs7561670	0.6301	rs1784692	rs10683723	0.7135
							rs6731009	rs35043804	0.6288	rs1784692	rs1784683	0.7092
							rs6731009	rs6708167	0.6258	rs1784692	rs1784684	0.7031
							rs6731009	rs7580013	0.6216	rs1784692	rs1672714	0.6662
							rs6731009	rs11124930	0.6181	rs1784692	rs1672713	0.6662
							rs6731009	rs35267248	0.6178	rs1784692	rs1672691	0.6203
							rs6731009	rs13026309	0.6176	rs1784692	rs2846629	0.6161
							rs6731009	rs6730757	0.6164	rs1784692	rs2852793	0.612
							rs6731009	rs1465618	0.6092	rs1784692	rs2735199	0.612
							rs6731009	rs6749927	0.5987	rs1784692	rs2852800	0.5108
							rs6731009	rs11897732	0.5946	rs2271194	rs2271194	1
							rs6731009	rs34640832	0.594	rs2271194	rs10876870	1
							rs6731009	rs6714624	0.5932	rs2271194	rs7971751	1
							rs6731009	rs7558302	0.5888	rs2271194	rs7297175	0.9796
							rs6731009	rs7595299	0.584	rs2271194	rs11171739	0.9757
							rs6731009	rs12468394	0.5802	rs2271194	rs1131017	0.9115
							rs6731009	rs13417665	0.5678	rs2271194	rs10876864	0.9115
							rs6731009	rs13429458	0.5634	rs2271194	rs4622308	0.8535
							rs6731009	rs7599564	0.5588	rs2271194	rs1081975	0.812
							rs6731009	rs72613901	0.5559	rs2271194	rs705700	0.812
							rs6731009	rs7572765	0.5503	rs2271194	rs773125	0.7974
							rs6731009	rs535503344	0.5479	rs2271194	rs705699	0.7937
							rs6731009	rs13402827	0.5465	rs2271194	rs773114	0.7936
							rs6731009	rs72613900	0.5431	rs2271194	rs1873914	0.7899
							rs6731009	rs72616903	0.5423	rs2271194	rs7312770	0.782
							rs6731009	rs6749108	0.5383	rs2271194	rs35830890	0.7611
							rs6731009	rs13030651	0.5294	rs2271194	rs877636	0.722
							rs6731009	rs72613899	0.5204	rs2271194	rs705696	0.7155
							rs6731009	rs4340576	0.5086	rs2271194	rs2292239	0.7155
							rs10176241	rs10176241	1	rs2271194	rs4759229	0.7107
							rs10176241	rs12712881	0.9489	rs2271194	rs3741499	0.7107
							rs10176241	rs7591218	0.9396	rs2271194	rs7955865	0.7067
							rs10176241	rs7582497	0.9167	rs2271194	rs7305461	0.6949
							rs10176241	rs7568365	0.9167	rs2271194	rs36159461	0.6872
							rs10176241	rs7567607	0.9167	rs2271194	rs2640562	0.6751
							rs10176241	rs10186921	0.9126	rs2271194	rs7302200	0.6538
							rs10176241	rs7355361	0.9126	rs2271194	rs141490969	0.65
							rs10176241	rs6544659	0.9077	rs2271194	rs61938963	0.65
							rs10176241	rs6751622	0.9032	rs2271194	rs61938962	0.65
							rs10176241	rs7569721	0.8987	rs2271194	rs10876866	0.6461
							rs10176241	rs6544661	0.8947	rs2271194	rs34415530	0.6461
							rs10176241	rs6761913	0.8944	rs2271194	rs2456973	0.6461
							rs10176241	rs871852	0.8897	rs2271194	rs772921	0.6461
							rs10176241	rs12478601	0.8897	rs2271194	rs2640564	0.6454
							rs10176241	rs999949	0.8811	rs2271194	rs705705	0.643
							rs10176241	rs1038822	0.8809	rs2271194	rs705704	0.643
							rs10176241	rs13423972	0.8808	rs2271194	rs34813703	0.643
							rs10176241	rs11896747	0.8768	rs2271194	rs1701704	0.643
							rs10176241	rs12990177	0.8764	rs2271194	rs1702877	0.64
							rs10176241	rs6544644	0.8719	rs2271194	rs1689510	0.6354
							rs10176241	rs7559891	0.8635	rs2271194	rs61555617	0.6279
							rs10176241	rs6544660	0.8585	rs2271194	rs705702	0.5711
							rs10176241	rs7589428	0.8585	rs2271194	rs772920	0.5682
							rs10176241	rs6746064	0.8511	rs2271194	rs773107	0.5594
							rs10176241	rs7563201	0.8365	rs2271194	rs705698	0.5559
							rs10176241	rs1465618	0.8279	rs2271194	rs61937249	0.5559
							rs10176241	rs13032919	0.8106	rs2271194	rs61937248	0.5559
							rs10176241	rs6714624	0.8069	rs2271194	rs61937247	0.5559
							rs10176241	rs11693801	0.8061	rs2271194	rs2048036	0.5559
							rs10176241	rs11124930	0.8026	rs2271194	rs773112	0.5559
							rs10176241	rs74343467	0.802	rs2271194	rs773111	0.5559
							rs10176241	rs7605725	0.7994	rs2271194	rs773110	0.5559
							rs10176241	rs6544671	0.7979	rs2271194	rs773109	0.5559
							rs10176241	rs7600872	0.7979	rs2271194	rs773108	0.5559
							rs10176241	rs10650807	0.7979	rs2271194	rs11343216	0.5315
							rs10176241	rs11899260	0.7979	rs1795379	rs1795379	1
							rs10176241	rs11888640	0.7979	rs1795379	rs3858534	0.9619
							rs10176241	rs1807866	0.7939	rs1795379	rs3847669	0.9619
							rs10176241	rs1472100	0.7937	rs1795379	rs1275468	0.9581
							rs10176241	rs3752355	0.7935	rs1795379	rs1148004	0.9525
							rs10176241	rs6730757	0.7782	rs1795379	rs1148000	0.9491
							rs10176241	rs145706702	0.7774	rs1795379	rs1275469	0.9491
							rs10176241	rs10179648	0.7765	rs1795379	rs17115231	0.9491
							rs10176241	rs57758828	0.7697	rs1795379	rs1148005	0.9479
							rs10176241	rs10200833	0.7688	rs1795379	rs6582292	0.9447
							rs10176241	rs34640832	0.7667	rs1795379	rs1148002	0.9444
							rs10176241	rs11897732	0.7576	rs1795379	rs1679381	0.9298
							rs10176241	rs7599564	0.7561	rs1795379	rs1148003	0.9118
							rs10176241	rs11429002	0.753	rs1795379	rs1148006	0.9031
							rs10176241	rs4952990	0.7517	rs1795379	rs34393682	0.9031
							rs10176241	rs7563876	0.7515	rs1795379	rs2366987	0.8854
							rs10176241	rs7572765	0.7479	rs1795379	rs10879928	0.8847
							rs10176241	rs13013639	0.7438	rs1795379	rs1275474	0.8847
							rs10176241	rs10865192	0.7432	rs1795379	rs1275472	0.8847
							rs10176241	rs72613902	0.7404	rs1795379	rs10879927	0.8847
							rs10176241	rs535503344	0.7404	rs1795379	rs1275484	0.8847
							rs10176241	rs59470270	0.7394	rs1795379	rs1275483	0.8847
							rs10176241	rs13022691	0.7385	rs1795379	rs139965332	0.8806
							rs10176241	rs12468394	0.7345	rs1795379	rs149307238	0.8759
							rs10176241	rs13016288	0.7307	rs1795379	rs1824982	0.8679
							rs10176241	rs13030651	0.7275	rs1795379	rs66929824	0.8631
							rs10176241	rs1491508	0.7266	rs1795379	rs1795380	0.8055
							rs10176241	rs4340576	0.7259	rs1795379	rs2620687	0.8055
							rs10176241	rs4146253	0.7183	rs1795379	rs1697753	0.8055
							rs10176241	rs6744642	0.7122	rs1795379	rs1679384	0.8055
							rs10176241	rs6738189	0.7019	rs1795379	rs1795374	0.8055
							rs10176241	rs6725776	0.6978	rs1795379	rs1630753	0.8055
							rs10176241	rs56304210	0.6976	rs1795379	rs2652022	0.8055
							rs10176241	rs147196397	0.6975	rs1795379	rs1480001	0.8055
							rs10176241	rs6719534	0.6974	rs1795379	rs1480002	0.8055
							rs10176241	rs78870521	0.6974	rs1795379	rs1795382	0.8008
							rs10176241	rs4337518	0.6941	rs1795379	rs11180554	0.7973
							rs10176241	rs6730316	0.6941	rs1795379	rs1627431	0.796
							rs10176241	rs6544672	0.6941	rs1795379	rs1383098	0.796
							rs10176241	rs2888875	0.6941	rs1795379	rs3912214	0.7679
							rs10176241	rs7596052	0.6938	rs1795379	rs1611928	0.764
							rs10176241	rs17031028	0.6938	rs1795379	rs1147994	0.764
							rs10176241	rs10165527	0.6938	rs1795379	rs1275471	0.718
							rs10176241	rs6754589	0.6938	rs1795379	rs7955269	0.718
							rs10176241	rs6754878	0.6938	rs1795379	rs1552040	0.6985
							rs10176241	rs6726014	0.6938	rs1795379	rs1697758	0.6418
							rs10176241	rs6544670	0.6936	rs1795379	rs67100412	0.6202
							rs10176241	rs6730500	0.6936	rs8043701	rs8043701	1
							rs10176241	rs11903287	0.6936	rs8043701	rs11639772	0.9675
							rs10176241	rs13000971	0.6936	rs8043701	rs28600983	0.9675
							rs10176241	rs7583837	0.6935	rs8043701	rs12927817	0.9675
							rs10176241	rs7599137	0.6935	rs8043701	rs11075467	0.9675
							rs10176241	rs150495967	0.6935	rs8043701	rs12446616	0.9675
							rs10176241	rs1873555	0.6935	rs8043701	rs146789487	0.9675
							rs10176241	rs9973398	0.6935	rs8043701	rs11642495	0.9675
							rs10176241	rs6756710	0.6935	rs8043701	rs12927194	0.9675
							rs10176241	rs6712861	0.6935	rs8043701	rs12917708	0.9675
							rs10176241	rs881477	0.6935	rs8043701	rs12922116	0.9675
							rs10176241	rs881476	0.6935	rs8043701	rs11645791	0.9675
							rs10176241	rs12990267	0.6933	rs8043701	rs12918945	0.9675
							rs10176241	rs74776407	0.6933	rs8043701	rs12931034	0.9675
							rs10176241	rs12470831	0.6933	rs8043701	rs12443528	0.9675
							rs10176241	rs199721109	0.6933	rs8043701	rs7186514	0.9675
							rs10176241	rs3042329	0.6898	rs8043701	rs11075466	0.961
							rs10176241	rs1873558	0.6898	rs8043701	rs139963703	0.961
							rs10176241	rs57477603	0.6896	rs8043701	rs28858446	0.961
							rs10176241	rs10164789	0.6896	rs8043701	rs7200621	0.961
							rs10176241	rs2011979	0.6896	rs8043701	rs12446036	0.961
							rs10176241	rs1873556	0.6895	rs8043701	rs117308534	0.9545
							rs10176241	rs970176	0.6895	rs8043701	rs11075468	0.9545
							rs10176241	rs6730741	0.6895	rs8043701	rs12918849	0.9545
							rs10176241	rs17031065	0.6892	rs853854	rs853854	1
							rs10176241	rs11898207	0.6892	rs853854	rs6058900	0.8121
							rs10176241	rs150227913	0.6892	rs853854	rs13038717	0.7963
							rs10176241	rs11899823	0.6892	rs853854	rs11167183	0.7566
							rs10176241	rs12477928	0.6892	rs853854	rs35271121	0.7566
							rs10176241	rs12477964	0.6892	rs853854	rs6058930	0.7566
							rs10176241	rs1873557	0.6858	rs853854	rs242548	0.7537
							rs10176241	rs59669565	0.6854	rs853854	rs242547	0.7537
							rs10176241	rs10211106	0.6854	rs853854	rs416815	0.7537
							rs10176241	rs11884565	0.6854	rs853854	rs853863	0.7537
							rs10176241	rs7578245	0.6852	rs853854	rs242553	0.7537
							rs10176241	rs76896890	0.6852	rs853854	rs447749	0.7537
							rs10176241	rs141311393	0.6852	rs853854	rs709047	0.7537
							rs10176241	rs6731009	0.6851	rs853854	rs242551	0.7537
							rs10176241	rs13021894	0.6851	rs853854	rs242535	0.7537
							rs10176241	rs34859017	0.6831	rs853854	rs10661490	0.7537
							rs10176241	rs11884742	0.6818	rs853854	rs404543	0.7537
							rs10176241	rs1158411	0.6816	rs853854	rs242536	0.7537
							rs10176241	rs2374551	0.6813	rs853854	rs242538	0.7537
							rs10176241	rs11888482	0.6813	rs853854	rs242544	0.7537
							rs10176241	rs10182489	0.6788	rs853854	rs242540	0.7537
							rs10176241	rs34512555	0.6777	rs853854	rs853853	0.7537
							rs10176241	rs112438660	0.6772	rs853854	rs66499347	0.7537
							rs10176241	rs201795193	0.6737	rs853854	rs17370071	0.7532
							rs10176241	rs6705356	0.6737	rs853854	rs11167182	0.7532
							rs10176241	rs6716620	0.6734	rs853854	rs6579042	0.7532
							rs10176241	rs6146742	0.6734	rs853854	rs187178	0.7507
							rs10176241	rs6742108	0.6697	rs853854	rs853859	0.7507
							rs10176241	rs6758733	0.6697	rs853854	rs401394	0.7507
							rs10176241	rs17030684	0.6663	rs853854	rs242528	0.7507
							rs10176241	rs146866240	0.6656	rs853854	rs11479132	0.7497
							rs10176241	rs34154601	0.6656	rs853854	rs6057661	0.7462
							rs10176241	rs74659914	0.6654	rs853854	rs6057662	0.7462
							rs10176241	rs11891936	0.6618	rs853854	rs242531	0.7458
							rs10176241	rs6712163	0.6618	rs853854	rs137987770	0.7351
							rs10176241	rs6544638	0.6618	rs853854	rs410488	0.7077
							rs10176241	rs6739345	0.6613	rs853854	rs853849	0.7047
							rs10176241	rs11890152	0.6611	rs853854	rs60935077	0.6888
							rs10176241	rs11443399	0.6611	rs853854	rs4911262	0.6829
							rs10176241	rs17031056	0.6577	rs853854	rs4911110	0.6829
							rs10176241	rs35645305	0.6573	rs853854	rs1569686	0.68
							rs10176241	rs12466030	0.6571	rs853854	rs6087999	0.68
							rs10176241	rs12185704	0.6548	rs853854	rs1883729	0.68
							rs10176241	rs35319517	0.6536	rs853854	rs11367842	0.68
							rs10176241	rs6544674	0.6531	rs853854	rs1333469	0.68
							rs10176241	rs148527005	0.6501	rs853854	rs6058893	0.677
							rs10176241	rs13017478	0.6471	rs853854	rs1003521	0.677
							rs10176241	rs34549634	0.6465	rs853854	rs200744362	0.6761
							rs10176241	rs11900952	0.6465	rs853854	rs13037496	0.6745
							rs10176241	rs13026309	0.642	rs853854	rs2424909	0.6723
							rs10176241	rs6544641	0.6414	rs853854	rs4911255	0.6723
							rs10176241	rs6544640	0.6414	rs853854	rs4911254	0.6723
							rs10176241	rs144688207	0.6378	rs853854	rs13043436	0.6687
							rs10176241	rs6708167	0.6351	rs853854	rs11697892	0.6687
							rs10176241	rs7575635	0.6344	rs853854	rs4911107	0.6596
							rs10176241	rs11904510	0.6343	rs853854	rs11469084	0.6596
							rs10176241	rs17031097	0.6335	rs853854	rs3835238	0.6596
							rs10176241	rs6544654	0.6307	rs853854	rs998382	0.6587
							rs10176241	rs7561670	0.6306	rs853854	rs11697940	0.6585
							rs10176241	rs79732325	0.6297	rs853854	rs3838010	0.6568
							rs10176241	rs71410186	0.6297	rs853854	rs6119281	0.6533
							rs10176241	rs35899859	0.6296	rs853854	rs742630	0.653
							rs10176241	rs17031100	0.6296	rs853854	rs2424903	0.653
							rs10176241	rs142959198	0.6266	rs853854	rs6058869	0.653
							rs10176241	rs34925018	0.6257	rs853854	rs992472	0.6511
							rs10176241	rs12052942	0.6256	rs853854	rs875041	0.6511
							rs10176241	rs17031102	0.6256	rs853854	rs11700082	0.6448
							rs10176241	rs35043804	0.6256	rs853854	rs6057663	0.6448
							rs10176241	rs4952992	0.6256	rs853854	rs6057665	0.6448
							rs10176241	rs35267248	0.6251	rs853854	rs11697690	0.6448
							rs10176241	rs7580013	0.6225	rs853854	rs73114154	0.6444
							rs10176241	rs66702817	0.6065	rs853854	rs6058868	0.6417
							rs10176241	rs6749927	0.5956	rs853854	rs2377667	0.6417
							rs10176241	rs35111198	0.5898	rs853854	rs1007123	0.6417
							rs10176241	rs10645834	0.589	rs853854	rs1007124	0.6417
							rs10176241	rs7595299	0.5709	rs853854	rs2424901	0.6417
							rs10176241	rs34717327	0.5693	rs853854	rs2424900	0.6417
							rs10176241	rs7558302	0.5688	rs853854	rs2424899	0.6417
							rs10176241	rs17031110	0.565	rs853854	rs13037833	0.6414
							rs10176241	rs6544673	0.5627	rs853854	rs11697394	0.6414
							rs10176241	rs72613900	0.559	rs853854	rs12625153	0.6414
							rs10176241	rs34461850	0.5585	rs853854	rs71337926	0.6414
							rs10176241	rs17031112	0.5534	rs853854	rs6058924	0.6414
							rs10176241	rs67193054	0.5502	rs853854	rs6058925	0.6414
							rs10176241	rs13402827	0.5435	rs853854	rs6058926	0.6414
							rs10176241	rs6749108	0.5392	rs853854	rs13042651	0.6414
							rs10176241	rs13429458	0.5364	rs853854	rs13038017	0.6414
							rs10176241	rs13417665	0.5329	rs853854	rs6058931	0.6414
							rs10176241	rs72613899	0.5241	rs853854	rs1855349	0.6396
							rs10176241	rs72613901	0.5233	rs853854	rs62208880	0.6386
							rs10176241	rs35186748	0.5202	rs853854	rs13037174	0.6383
							rs12478601	rs12478601	1	rs853854	rs13037187	0.6383
							rs12478601	rs1038822	0.9717	rs853854	rs13037762	0.6383
							rs12478601	rs11896747	0.958	rs853854	rs13038881	0.6383
							rs12478601	rs6751622	0.9576	rs853854	rs1883730	0.638
							rs12478601	rs999949	0.9532	rs853854	rs6058860	0.638
							rs12478601	rs6746064	0.9493	rs853854	rs12329424	0.638
							rs12478601	rs6761913	0.9481	rs853854	rs61542599	0.638
							rs12478601	rs7559891	0.9439	rs853854	rs4287835	0.6352
							rs12478601	rs6544661	0.9397	rs853854	rs2014837	0.6352
							rs12478601	rs12990177	0.9387	rs853854	rs6058875	0.6329
							rs12478601	rs6544660	0.9387	rs853854	rs6058874	0.6329
							rs12478601	rs13423972	0.9343	rs853854	rs140593993	0.6322
							rs12478601	rs10186921	0.9294	rs853854	rs6058873	0.6314
							rs12478601	rs7591218	0.9209	rs853854	rs910085	0.6313
							rs12478601	rs7582497	0.9158	rs853854	rs2424918	0.6313
							rs12478601	rs7568365	0.9158	rs853854	rs4911108	0.6286
							rs12478601	rs7567607	0.9158	rs853854	rs2377668	0.6286
							rs12478601	rs6544659	0.9065	rs853854	rs4911258	0.6286
							rs12478601	rs7355361	0.9033	rs853854	rs6141814	0.6286
							rs12478601	rs7569721	0.8978	rs853854	rs17123658	0.6258
							rs12478601	rs6544644	0.8971	rs853854	rs72269343	0.6258
							rs12478601	rs12712881	0.8943	rs853854	rs6088008	0.6258
							rs12478601	rs10176241	0.8897	rs853854	rs1474738	0.6258
							rs12478601	rs7600872	0.8837	rs853854	rs910084	0.6258
							rs12478601	rs10650807	0.8837	rs853854	rs4911259	0.623
							rs12478601	rs871852	0.8795	rs853854	rs4911109	0.623
							rs12478601	rs1807866	0.8795	rs853854	rs2889702	0.623
							rs12478601	rs1472100	0.8793	rs853854	rs58356244	0.6161
							rs12478601	rs13032919	0.8791	rs853854	rs2424904	0.6161
							rs12478601	rs74343467	0.8791	rs853854	rs4911257	0.6022
							rs12478601	rs3752355	0.8791	rs853854	rs11480453	0.6022
							rs12478601	rs6544671	0.8747	rs853854	rs2018002	0.5963
							rs12478601	rs7563201	0.8608	rs853854	rs6087990	0.5963
							rs12478601	rs11899260	0.8569	rs853854	rs6058897	0.5797
							rs12478601	rs11888640	0.8569	rs853854	rs62208908	0.5751
							rs12478601	rs145706702	0.8531	rs853854	rs34111982	0.5605
							rs12478601	rs7589428	0.8478	rs853854	rs11449585	0.5544
							rs12478601	rs11693801	0.8474	rs853854	rs11167185	0.5477
							rs12478601	rs57758828	0.8363	rs853854	rs11167186	0.5468
							rs12478601	rs13013639	0.8357	rs853854	rs148275442	0.5416
							rs12478601	rs10179648	0.8345	rs853854	rs11389019	0.5398
							rs12478601	rs59470270	0.831	rs853854	rs2377733	0.5367
							rs12478601	rs72613902	0.8232	rs853854	rs6058949	0.5355
							rs12478601	rs13016288	0.8216	rs853854	rs10623814	0.5351
							rs12478601	rs11124930	0.8182	rs853854	rs35995511	0.5329
							rs12478601	rs6730757	0.8176	rs853854	rs34062797	0.5296
							rs12478601	rs34640832	0.8146	rs853854	rs6087989	0.5261
							rs12478601	rs4146253	0.8084	rs853854	rs2424897	0.523
							rs12478601	rs1465618	0.8076	rs853854	rs6058859	0.523
							rs12478601	rs6714624	0.8032	rs853854	rs11696131	0.5199
							rs12478601	rs1491508	0.7995	rs853854	rs113305339	0.5199
							rs12478601	rs11897732	0.7962	rs853854	rs4911106	0.5199
							rs12478601	rs13022691	0.7857	rs853854	rs4911252	0.5174
							rs12478601	rs6744642	0.7844	rs853854	rs4911105	0.5171
							rs12478601	rs6738189	0.7821	rs853854	rs6119279	0.5168
							rs12478601	rs6730500	0.7733	rs853854	rs4911261	0.5127
							rs12478601	rs11903287	0.7733	rs853854	rs2064350	0.5127
							rs12478601	rs13000971	0.7733	rs853854	rs2424929	0.5127
							rs12478601	rs7583837	0.7731	rs853854	rs2065576	0.5127
							rs12478601	rs7599137	0.7731	rs853854	rs2424928	0.5127
							rs12478601	rs150495967	0.7731	rs853854	rs1855350	0.5127
							rs12478601	rs1873555	0.7731	rs853854	rs2424922	0.5127
							rs12478601	rs9973398	0.7731	rs853854	rs6058891	0.5127
							rs12478601	rs6756710	0.7731	rs853854	rs2424921	0.5127
							rs12478601	rs6712861	0.7731	rs853854	rs2424920	0.5127
							rs12478601	rs881477	0.7731	rs853854	rs6057647	0.5127
							rs12478601	rs881476	0.7731	rs853854	rs910083	0.5099
							rs12478601	rs12470831	0.773	rs853854	rs4911260	0.5099
							rs12478601	rs57477603	0.7691	rs853854	rs2424914	0.5099
							rs12478601	rs6725776	0.7691	rs853854	rs1003522	0.5099
							rs12478601	rs10164789	0.7691	rs853854	rs6058883	0.5099
							rs12478601	rs56304210	0.7689	rs853854	rs2424907	0.5099
							rs12478601	rs1873556	0.7689	rs853854	rs6058892	0.5071
							rs12478601	rs6730741	0.7689	rs853854	rs1997797	0.5071
							rs12478601	rs7605725	0.7687	rs853854	rs58422530	0.5071
							rs12478601	rs17031065	0.7686	rs853854	rs2424905	0.5047
							rs12478601	rs11898207	0.7686	rs853854	rs6141806	0.5017
							rs12478601	rs150227913	0.7686	rs1351592	rs1351592	1
							rs12478601	rs11899823	0.7686	rs1351592	rs13382807	1
							rs12478601	rs12477928	0.7686	rs1351592	rs1351594	0.888
							rs12478601	rs12477964	0.7686	rs1351592	rs6745293	0.888
							rs12478601	rs11429002	0.7651	rs1351592	rs5838339	0.888
							rs12478601	rs4337518	0.7651	rs1351592	rs979125	0.888
							rs12478601	rs6730316	0.7651	rs1351592	rs1947932	0.8817
							rs12478601	rs6544672	0.7651	rs1351592	rs4672648	0.8754
							rs12478601	rs2888875	0.7651	rs1351592	rs4233986	0.8754
							rs12478601	rs7596052	0.7648	rs1351592	rs1351593	0.8278
							rs12478601	rs17031028	0.7648	rs1351592	rs35269142	0.8278
							rs12478601	rs10165527	0.7648	rs1351592	rs7598042	0.8278
							rs12478601	rs6754589	0.7648	rs1351592	rs7571642	0.8278
							rs12478601	rs6754878	0.7648	rs1351592	rs6724920	0.8278
							rs12478601	rs6726014	0.7648	rs1351592	rs2178575	0.8278
							rs12478601	rs6544670	0.7646	rs1351592	rs7573568	0.8278
							rs12478601	rs59669565	0.7646	rs1351592	rs6435709	0.8278
							rs12478601	rs10865192	0.7643	rs1351592	rs6435708	0.8278
							rs12478601	rs12990267	0.7643	rs1351592	rs6761143	0.8278
							rs12478601	rs76896890	0.7643	rs1351592	rs16848753	0.8278
							rs12478601	rs74776407	0.7643	rs1351592	rs7561571	0.8278
							rs12478601	rs141311393	0.7643	rs1351592	rs2178576	0.8215
							rs12478601	rs6731009	0.7642	rs1351592	rs2128323	0.8215
							rs12478601	rs13021894	0.7642	rs1351592	rs74690816	0.6063
							rs12478601	rs12468394	0.7641	rs1351592	rs77159266	0.521
							rs12478601	rs535503344	0.7609	rs1351592	rs1531788	0.5108
							rs12478601	rs3042329	0.7606	rs1351592	rs7564590	0.5108
							rs12478601	rs1873558	0.7606	rs1351592	rs116117160	0.5086
							rs12478601	rs1158411	0.7606	rs1351592	rs112599092	0.5086
							rs12478601	rs2011979	0.7604	rs1351592	rs16848751	0.5031
							rs12478601	rs970176	0.7602	rs1275468	rs1275468	1
							rs12478601	rs2374551	0.7602	rs1275468	rs1275469	0.9906
							rs12478601	rs7599564	0.76	rs1275468	rs1148000	0.9906
							rs12478601	rs78870521	0.7599	rs1275468	rs17115231	0.9906
							rs12478601	rs1873557	0.7564	rs1275468	rs6582292	0.986
							rs12478601	rs34512555	0.7564	rs1275468	rs1148002	0.9859
							rs12478601	rs10211106	0.756	rs1275468	rs1679381	0.9719
							rs12478601	rs11884565	0.756	rs1275468	rs1795379	0.9581
							rs12478601	rs10200833	0.7557	rs1275468	rs1148003	0.9534
							rs12478601	rs7578245	0.7557	rs1275468	rs1148006	0.9442
							rs12478601	rs7563876	0.7556	rs1275468	rs34393682	0.9442
							rs12478601	rs6705356	0.7522	rs1275468	rs3858534	0.9214
							rs12478601	rs11884742	0.7522	rs1275468	rs3847669	0.9214
							rs12478601	rs11888482	0.7516	rs1275468	rs1148004	0.9122
							rs12478601	rs7572765	0.7516	rs1275468	rs1148005	0.9076
							rs12478601	rs147196397	0.7514	rs1275468	rs2366987	0.8455
							rs12478601	rs6742108	0.748	rs1275468	rs10879928	0.8449
							rs12478601	rs6758733	0.748	rs1275468	rs1275474	0.8449
							rs12478601	rs112438660	0.7472	rs1275468	rs1275472	0.8449
							rs12478601	rs199721109	0.7471	rs1275468	rs10879927	0.8449
							rs12478601	rs201795193	0.7436	rs1275468	rs1275484	0.8449
							rs12478601	rs146866240	0.7436	rs1275468	rs1275483	0.8449
							rs12478601	rs34154601	0.7436	rs1275468	rs139965332	0.8409
							rs12478601	rs4952990	0.7386	rs1275468	rs149307238	0.8364
							rs12478601	rs74659914	0.7348	rs1275468	rs1824982	0.8285
							rs12478601	rs35645305	0.7348	rs1275468	rs66929824	0.824
							rs12478601	rs12466030	0.7345	rs1275468	rs3912214	0.8123
							rs12478601	rs6719534	0.7335	rs1275468	rs1611928	0.809
							rs12478601	rs10182489	0.7323	rs1275468	rs1147994	0.809
							rs12478601	rs13030651	0.7306	rs1275468	rs1795380	0.7718
							rs12478601	rs6739345	0.7304	rs1275468	rs2620687	0.7718
							rs12478601	rs11443399	0.7301	rs1275468	rs1697753	0.7718
							rs12478601	rs17031056	0.7266	rs1275468	rs1679384	0.7718
							rs12478601	rs35319517	0.7223	rs1275468	rs1795374	0.7718
							rs12478601	rs11890152	0.7218	rs1275468	rs1630753	0.7718
							rs12478601	rs6544674	0.7217	rs1275468	rs2652022	0.7718
							rs12478601	rs34859017	0.7097	rs1275468	rs1480001	0.7718
							rs12478601	rs17031097	0.7093	rs1275468	rs1480002	0.7718
							rs12478601	rs71410186	0.7054	rs1275468	rs1795382	0.7671
							rs12478601	rs35899859	0.7052	rs1275468	rs1627431	0.7625
							rs12478601	rs17031100	0.7052	rs1275468	rs1383098	0.7625
							rs12478601	rs11891936	0.7051	rs1275468	rs11180554	0.7591
							rs12478601	rs11904510	0.7019	rs1275468	rs1275471	0.6854
							rs12478601	rs148527005	0.7017	rs1275468	rs7955269	0.6854
							rs12478601	rs34925018	0.7011	rs1275468	rs1552040	0.6663
							rs12478601	rs12052942	0.701	rs1275468	rs1697758	0.611
							rs12478601	rs17031102	0.701	rs1275468	rs67100412	0.5929
							rs12478601	rs4952992	0.7009	rs644592	rs644592	1
							rs12478601	rs144688207	0.6971	rs644592	rs609320	0.9779
							rs12478601	rs79732325	0.697	rs644592	rs1293259	0.9627
							rs12478601	rs4340576	0.6812	rs644592	rs9438866	0.9045
							rs12478601	rs13017478	0.6811	rs644592	rs2375279	0.9045
							rs12478601	rs34549634	0.6805	rs644592	rs3091243	0.9039
							rs12478601	rs12185704	0.6805	rs644592	rs5773126	0.8608
							rs12478601	rs66702817	0.6804	rs644592	rs9438901	0.8529
							rs12478601	rs142959198	0.677	rs644592	rs2375278	0.8167
							rs12478601	rs17030684	0.6669	rs644592	rs4518840	0.6455
							rs12478601	rs6716620	0.666	rs644592	rs2257611	0.6322
							rs12478601	rs6146742	0.666	rs644592	rs4126584	0.6286
							rs12478601	rs6712163	0.6625	rs644592	rs4126583	0.6286
							rs12478601	rs6544638	0.6625	rs644592	rs2427767	0.6286
							rs12478601	rs10645834	0.6541	rs644592	rs2986167	0.6286
							rs12478601	rs11900952	0.6467	rs644592	rs2904843	0.6286
							rs12478601	rs13026309	0.6423	rs644592	rs3927482	0.6251
							rs12478601	rs6544641	0.6419	rs644592	rs2478025	0.6251
							rs12478601	rs6544640	0.6419	rs644592	rs12126031	0.6251
							rs12478601	rs7558302	0.6399	rs644592	rs202154122	0.6219
							rs12478601	rs17031110	0.6366	rs644592	rs760970	0.6181
							rs12478601	rs35043804	0.636	rs644592	rs78207142	0.6165
							rs12478601	rs7575635	0.6345	rs644592	rs61775205	0.6163
							rs12478601	rs34717327	0.6327	rs644592	rs201304363	0.6149
							rs12478601	rs6544654	0.632	rs644592	rs675072	0.6134
							rs12478601	rs7561670	0.6306	rs644592	rs3866916	0.6123
							rs12478601	rs6708167	0.6267	rs644592	rs28669938	0.6114
							rs12478601	rs6544673	0.6263	rs644592	rs3118453	0.6113
							rs12478601	rs35267248	0.6255	rs644592	rs28510210	0.6113
							rs12478601	rs17031112	0.6241	rs644592	rs35543461	0.6096
							rs12478601	rs7580013	0.6224	rs644592	rs28622222	0.6079
							rs12478601	rs34461850	0.6214	rs644592	rs2478028	0.6046
							rs12478601	rs67193054	0.6209	rs644592	rs28685153	0.6046
							rs12478601	rs6749927	0.5964	rs644592	rs12730931	0.6031
							rs12478601	rs35111198	0.5933	rs644592	rs28628791	0.6012
							rs12478601	rs35186748	0.5807	rs644592	rs28718098	0.5983
							rs12478601	rs7595299	0.5703	rs644592	rs60224697	0.5914
							rs12478601	rs13417665	0.5622	rs644592	rs3927483	0.5914
							rs12478601	rs72613901	0.5603	rs644592	rs28668998	0.585
							rs12478601	rs13429458	0.5577	rs644592	rs28645510	0.5781
							rs12478601	rs72613900	0.5394	rs644592	rs1830962	0.5756
							rs12478601	rs6749108	0.5375	rs644592	rs2301153	0.5749
							rs12478601	rs13402827	0.5328	rs644592	rs599792	0.5535
							rs12478601	rs72616903	0.5286	rs76169311	rs76169311	1
							rs12478601	rs34513683	0.5139	rs76169311	rs10922200	0.9665
							rs12478601	rs72613899	0.5106	rs76169311	rs113014813	0.9665
							rs7582497	rs7582497	1	rs76169311	rs12061783	0.9665
							rs7582497	rs7568365	1	rs76169311	rs146593587	0.9554
							rs7582497	rs7567607	1	rs76169311	rs57682620	0.9554
							rs7582497	rs7591218	0.9765	rs76169311	rs1572514	0.9554
							rs7582497	rs6544659	0.9527	rs76169311	rs2786104	0.9554
							rs7582497	rs10186921	0.9481	rs76169311	rs2821126	0.9554
							rs7582497	rs7569721	0.9436	rs76169311	rs2821110	0.9446
							rs7582497	rs12712881	0.9397	rs76169311	rs28553459	0.9112
							rs7582497	rs6761913	0.9387	rs76169311	rs17618450	0.9112
							rs7582497	rs7355361	0.9215	rs76169311	rs188579526	0.9111
							rs7582497	rs10176241	0.9167	rs76169311	rs71700211	0.9111
							rs7582497	rs12478601	0.9158	rs76169311	rs10157465	0.9002
							rs7582497	rs12990177	0.9108	rs76169311	rs13375540	0.8892
							rs7582497	rs1038822	0.9071	rs76169311	rs61034691	0.8892
							rs7582497	rs999949	0.8983	rs76169311	rs112136107	0.8892
							rs7582497	rs13423972	0.8978	rs76169311	rs61458598	0.8892
							rs7582497	rs11896747	0.894	rs76169311	rs10922201	0.8892
							rs7582497	rs6751622	0.8934	rs76169311	rs12068255	0.8892
							rs7582497	rs871852	0.8885	rs76169311	rs12062841	0.8782
							rs7582497	rs6544661	0.8854	rs76169311	rs41302107	0.8782
							rs7582497	rs6544660	0.8837	rs76169311	rs2821111	0.8781
							rs7582497	rs1465618	0.8789	rs76169311	rs2821120	0.8781
							rs7582497	rs6746064	0.8769	rs76169311	rs10922242	0.8682
							rs7582497	rs7559891	0.8715	rs76169311	rs10494755	0.8682
							rs7582497	rs6544644	0.8699	rs76169311	rs111371365	0.8682
							rs7582497	rs11693801	0.8653	rs76169311	rs113633618	0.8682
							rs7582497	rs11124930	0.8619	rs76169311	rs12094462	0.8682
							rs7582497	rs7563201	0.8519	rs76169311	rs75007359	0.8682
							rs7582497	rs6714624	0.8477	rs76169311	rs10922264	0.8682
							rs7582497	rs7589428	0.839	rs76169311	rs78628589	0.8676
							rs7582497	rs7600872	0.8217	rs76169311	rs78568179	0.8672
							rs7582497	rs10650807	0.8217	rs76169311	rs12094881	0.8581
							rs7582497	rs1807866	0.8178	rs76169311	rs10801621	0.8371
							rs7582497	rs6730757	0.8176	rs76169311	rs6685897	0.8371
							rs7582497	rs1472100	0.8175	rs76169311	rs112883537	0.8274
							rs7582497	rs13032919	0.8172	rs76169311	rs10922269	0.8274
							rs7582497	rs74343467	0.8172	rs76169311	rs111238846	0.8274
							rs7582497	rs3752355	0.8172	rs76169311	rs74541273	0.8274
							rs7582497	rs6544671	0.813	rs76169311	rs17641842	0.8274
							rs7582497	rs34640832	0.7966	rs76169311	rs6661330	0.8274
							rs7582497	rs11897732	0.7962	rs76169311	rs113807376	0.8274
							rs7582497	rs11429002	0.7915	rs76169311	rs111891253	0.8274
							rs7582497	rs11899260	0.7873	rs76169311	rs12079329	0.8274
							rs7582497	rs11888640	0.7873	rs76169311	rs7415533	0.8274
							rs7582497	rs145706702	0.784	rs76169311	rs112562413	0.8274
							rs7582497	rs57758828	0.7766	rs76169311	rs77220366	0.8274
							rs7582497	rs10200833	0.773	rs76169311	rs2358488	0.8274
							rs7582497	rs7563876	0.7728	rs76169311	rs112997107	0.8274
							rs7582497	rs7605725	0.7687	rs76169311	rs12079478	0.8274
							rs7582497	rs10179648	0.7656	rs76169311	rs78259147	0.8245
							rs7582497	rs13013639	0.7646	rs76169311	rs10494761	0.8179
							rs7582497	rs12468394	0.7641	rs76169311	rs17567921	0.8056
							rs7582497	rs72613902	0.7609	rs76169311	rs76250973	0.8056
							rs7582497	rs535503344	0.7609	rs76169311	rs151133986	0.7885
							rs7582497	rs59470270	0.7602	rs76169311	rs114848122	0.7828
							rs7582497	rs13016288	0.76	rs76169311	rs10922301	0.7623
							rs7582497	rs7599564	0.76	rs76169311	rs10922302	0.7623
							rs7582497	rs4146253	0.7558	rs76169311	rs10922303	0.7623
							rs7582497	rs4952990	0.7557	rs76169311	rs60595076	0.7623
							rs7582497	rs7572765	0.7516	rs76169311	rs1004479	0.7529
							rs7582497	rs6744642	0.749	rs76169311	rs1039288	0.7529
							rs7582497	rs10865192	0.7471	rs76169311	rs1039287	0.7529
							rs7582497	rs4340576	0.7388	rs76169311	rs11800139	0.7515
							rs7582497	rs6719534	0.7335	rs76169311	rs6428419	0.7436
							rs7582497	rs13030651	0.7306	rs76169311	rs6704237	0.7314
							rs7582497	rs1491508	0.7302	rs76169311	rs2047540	0.6888
							rs7582497	rs13022691	0.726	rs76169311	rs2047541	0.6888
							rs7582497	rs6738189	0.7134	rs76169311	rs10922314	0.6888
							rs7582497	rs7583837	0.7133	rs76169311	rs12062450	0.6797
							rs7582497	rs7599137	0.7133	rs76169311	rs10922307	0.6677
							rs7582497	rs150495967	0.7133	rs76169311	rs10922308	0.6677
							rs7582497	rs1873555	0.7133	rs76169311	rs10922309	0.6677
							rs7582497	rs9973398	0.7133	rs76169311	rs10922310	0.6677
							rs7582497	rs6756710	0.7133	rs76169311	rs10922311	0.6677
							rs7582497	rs6712861	0.7133	rs76169311	rs16842055	0.6677
							rs7582497	rs881477	0.7133	rs76169311	rs10922312	0.6677
							rs7582497	rs881476	0.7133	rs76169311	rs12079525	0.6677
							rs7582497	rs34859017	0.7097	rs76169311	rs1422212336	0.6403
							rs7582497	rs10164789	0.7092	rs76169311	rs144109576	0.5904
							rs7582497	rs56304210	0.7092	rs76484234	rs76484234	1
							rs7582497	rs1873556	0.7092	rs76484234	rs113249414	0.8567
							rs7582497	rs17031065	0.7092	rs76484234	rs146899597	0.5185
							rs7582497	rs11898207	0.7092	rs56949836	rs56949836	1
							rs7582497	rs11891936	0.7051	rs56949836	rs76016587	1
							rs7582497	rs6731009	0.7051	rs56949836	rs77812561	1
							rs7582497	rs13021894	0.7051	rs56949836	rs1412126	1
							rs7582497	rs6730500	0.705	rs56949836	rs57524084	1
							rs7582497	rs11903287	0.705	rs56949836	rs10710292	1
							rs7582497	rs13000971	0.705	rs56949836	rs73490440	0.9372
							rs7582497	rs59669565	0.705	rs56949836	rs73649403	0.8434
							rs7582497	rs12990267	0.705	rs79743873	rs79743873	1
							rs7582497	rs76896890	0.705	rs79743873	rs28715414	1
							rs7582497	rs74776407	0.705	rs79743873	rs59115005	1
							rs7582497	rs141311393	0.705	rs79743873	rs79741100	1
							rs7582497	rs12470831	0.705	rs79743873	rs9950757	1
							rs7582497	rs3042329	0.701	rs79743873	rs9957468	1
							rs7582497	rs57477603	0.7009	rs79743873	rs9944755	1
							rs7582497	rs6725776	0.7009	rs79743873	rs9963453	1
							rs7582497	rs2011979	0.7009	rs79743873	rs113689425	1
							rs7582497	rs78870521	0.7009	rs79743873	rs16940762	1
							rs7582497	rs150227913	0.7009	rs79743873	rs16940765	1
							rs7582497	rs11899823	0.7009	rs79743873	rs76309728	0.9877
							rs7582497	rs12477928	0.7009	rs79743873	rs28670644	0.9877
							rs7582497	rs12477964	0.7009	rs79743873	rs76195231	0.9877
							rs7582497	rs6730741	0.7009	rs79743873	rs8084811	0.9876
							rs7582497	rs4337518	0.6968	rs79743873	rs113206671	0.9053
							rs7582497	rs6730316	0.6968	rs79743873	rs536468	0.9053
							rs7582497	rs6544672	0.6968	rs79743873	rs9945837	0.9053
							rs7582497	rs2888875	0.6968	rs79743873	rs76366841	0.9053
							rs7582497	rs7596052	0.6968	rs79743873	rs76893784	0.9053
							rs7582497	rs17031028	0.6968	rs79743873	rs28450067	0.8775
							rs7582497	rs10165527	0.6968	rs79743873	rs112564763	0.8525
							rs7582497	rs6754589	0.6968	rs79743873	rs139389996	0.8525
							rs7582497	rs6754878	0.6968	rs79743873	rs475997	0.6654
							rs7582497	rs6726014	0.6968	rs79743873	rs111869386	0.6011
							rs7582497	rs7578245	0.6967	rs79743873	rs9951555	0.6011
							rs7582497	rs6544670	0.6967	rs79743873	rs111484655	0.6011
							rs7582497	rs6705356	0.6927	rs79743873	rs104000	0.5182
							rs7582497	rs1873558	0.6926	rs79743873	rs1786752	0.5062
							rs7582497	rs1158411	0.6926	rs79743873	rs529296	0.5062
							rs7582497	rs147196397	0.6926	rs79743873	rs472600	0.5023
							rs7582497	rs970176	0.6926	rs79743873	rs148083388	0.5023
							rs7582497	rs2374551	0.6926	rs77667361	rs77667361	1
							rs7582497	rs10182489	0.6917	rs77667361	rs78744269	0.9811
							rs7582497	rs6716620	0.6914	rs77667361	rs978110	0.9283
							rs7582497	rs6146742	0.6914	rs77667361	rs78231066	0.8616
							rs7582497	rs12185704	0.6891	rs77667361	rs76576796	0.7489
							rs7582497	rs199721109	0.6886	rs77667361	rs56385432	0.6801
							rs7582497	rs1873557	0.6885	rs77667361	rs7599452	0.6033
							rs7582497	rs34512555	0.6885	rs77667361	rs71929392	0.6033
							rs7582497	rs10211106	0.6884	rs77667361	rs10931407	0.6033
							rs7582497	rs11884565	0.6884	rs77667361	rs10166623	0.6033
							rs7582497	rs201795193	0.6844	rs77667361	rs10175776	0.6033
							rs7582497	rs146866240	0.6844	rs77667361	rs1982128	0.6033
							rs7582497	rs34154601	0.6844	rs77667361	rs2347395	0.6033
							rs7582497	rs11884742	0.6844	rs77667361	rs1836531	0.6033
							rs7582497	rs11888482	0.6843	rs77667361	rs1435027	0.6033
							rs7582497	rs13017478	0.6811	rs77667361	rs10931408	0.5959
							rs7582497	rs34549634	0.6805	rs77667361	rs66648811	0.5959
							rs7582497	rs6742108	0.6804	rs77667361	rs13420110	0.5959
							rs7582497	rs6758733	0.6804	rs77667361	rs145607742	0.5959
							rs7582497	rs11443399	0.6803	rs77667361	rs6727231	0.5959
							rs7582497	rs112438660	0.6803	rs77667361	rs7561993	0.5959
							rs7582497	rs74659914	0.6762	rs77667361	rs4664639	0.5959
							rs7582497	rs35645305	0.6762	rs77667361	rs7595796	0.5959
							rs7582497	rs6544674	0.6721	rs77667361	rs10207967	0.5959
							rs7582497	rs6739345	0.6721	rs77667361	rs10185132	0.5959
							rs7582497	rs12466030	0.668	rs77667361	rs111527357	0.5746
							rs7582497	rs17030684	0.6669	rs77667361	rs1435037	0.5746
							rs7582497	rs11890152	0.6646	rs77667361	rs9636312	0.5746
							rs7582497	rs6712163	0.6625	rs77667361	rs2347396	0.5746
							rs7582497	rs6544638	0.6625	rs77667361	rs1430617	0.542
							rs7582497	rs35043804	0.6599	rs77667361	rs113445935	0.5275
							rs7582497	rs17031056	0.6599	rs112004774	rs112004774	1
							rs7582497	rs6544654	0.6565	rs112004774	rs16872724	0.6422
							rs7582497	rs35319517	0.6558	rs112004774	rs2287709	0.6422
							rs7582497	rs71410186	0.6477	rs112004774	rs2287708	0.6422
							rs7582497	rs11900952	0.6467	rs112004774	rs16872726	0.6422
							rs7582497	rs4952992	0.6439	rs112004774	rs80301423	0.6422
							rs7582497	rs148527005	0.6438	rs112004774	rs142821427	0.6028
							rs7582497	rs17031097	0.6438	rs112004774	rs75269514	0.6028
							rs7582497	rs13026309	0.6423	rs112004774	rs77751756	0.6028
							rs7582497	rs6544641	0.6419	rs112004774	rs17672204	0.6028
							rs7582497	rs6544640	0.6419	rs112004774	rs17671845	0.5698
							rs7582497	rs35899859	0.6397	rs112004774	rs16872665	0.5698
							rs7582497	rs17031100	0.6397	rs112004774	rs16872674	0.5698
							rs7582497	rs144688207	0.6397	rs112004774	rs200022150	0.5642
							rs7582497	rs11904510	0.6359	rs112004774	rs75168664	0.5642
							rs7582497	rs12052942	0.6358	rs112004774	rs7714554	0.5496
							rs7582497	rs17031102	0.6358	rs112004774	rs10515215	0.5496
							rs7582497	rs34925018	0.6357	rs112004774	rs16872720	0.5496
							rs7582497	rs7575635	0.6345	rs112004774	rs60389922	0.5496
							rs7582497	rs79732325	0.6317	rs112004774	rs59115766	0.5496
							rs7582497	rs7561670	0.6306	rs112004774	rs16872723	0.5496
							rs7582497	rs6708167	0.6267	rs112004774	rs60005967	0.5496
							rs7582497	rs35267248	0.6255	rs112004774	rs138091235	0.5357
							rs7582497	rs66702817	0.6247	rs112004774	rs181728687	0.5357
							rs7582497	rs7580013	0.6224	rs112004774	rs149540746	0.5357
							rs7582497	rs142959198	0.6199	rs112004774	rs182926195	0.5357
							rs7582497	rs7558302	0.6024	rs112004774	rs184016276	0.5357
							rs7582497	rs6749927	0.5964	rs112004774	rs569255498	0.5357
							rs7582497	rs13417665	0.5954	rs112004774	rs140798829	0.5357
							rs7582497	rs35111198	0.5933	rs112004774	rs141109764	0.5296
							rs7582497	rs13429458	0.5907	rs112004774	rs202097519	0.5263
							rs7582497	rs10645834	0.5892	rs140485756	rs140485756	1
							rs7582497	rs17031110	0.5886	rs140485756	rs1328727	1
							rs7582497	rs17031112	0.5846	rs140485756	rs77468726	1
							rs7582497	rs67193054	0.5811	rs140485756	rs74524205	1
							rs7582497	rs6544673	0.5779	rs140485756	rs77791927	1
							rs7582497	rs34461850	0.5772	rs140485756	rs76754258	1
							rs7582497	rs34717327	0.5717	rs140485756	rs73468708	1
							rs7582497	rs7595299	0.5703	rs140485756	rs186730292	1
							rs7582497	rs35186748	0.5579	rs140485756	rs145820253	1
							rs7582497	rs72613901	0.5521	rs140485756	rs6924081	1
							rs7582497	rs13402827	0.5488	rs140485756	rs113910583	1
							rs7582497	rs72613900	0.5475	rs140485756	rs73472614	1
							rs7582497	rs6749108	0.5375	rs140485756	rs60605205	1
							rs7582497	rs72613899	0.5177	rs140485756	rs7738652	1
							rs1038822	rs1038822	1	rs140485756	rs28535592	1
							rs1038822	rs12478601	0.9717	rs140485756	rs28629971	1
							rs1038822	rs11896747	0.9672	rs140485756	rs7764619	1
							rs1038822	rs6751622	0.9484	rs140485756	rs117009546	1
							rs1038822	rs999949	0.944	rs140485756	rs57288840	1
							rs1038822	rs7559891	0.944	rs140485756	rs78750134	1
							rs1038822	rs6746064	0.9399	rs140485756	rs12111401	1
							rs1038822	rs6544661	0.9305	rs140485756	rs12110770	1
							rs1038822	rs13423972	0.9254	rs140485756	rs145597513	1
							rs1038822	rs6761913	0.9209	rs140485756	rs12111407	1
							rs1038822	rs10186921	0.9209	rs140485756	rs116188767	1
							rs1038822	rs7591218	0.912	rs140485756	rs12111276	1
							rs1038822	rs12990177	0.9117	rs140485756	rs16867632	1
							rs1038822	rs6544660	0.9115	rs140485756	rs6938482	1
							rs1038822	rs7582497	0.9071	rs140485756	rs6940909	1
							rs1038822	rs7568365	0.9071	rs140485756	rs76196352	1
							rs1038822	rs7567607	0.9071	rs140485756	rs6455317	1
							rs1038822	rs7569721	0.8981	rs140485756	rs10596672	1
							rs1038822	rs7355361	0.8944	rs140485756	rs1969737	1
							rs1038822	rs12712881	0.8944	rs140485756	rs146999655	1
							rs1038822	rs10176241	0.8809	rs140485756	rs148289270	1
							rs1038822	rs6544659	0.8799	rs140485756	rs142218075	1
							rs1038822	rs7600872	0.8754	rs140485756	rs145625851	1
							rs1038822	rs10650807	0.8754	rs140485756	rs138302755	1
							rs1038822	rs1807866	0.8711	rs140485756	rs57331990	1
							rs1038822	rs1472100	0.871	rs140485756	rs368028643	1
							rs1038822	rs13032919	0.8709	rs140485756	rs181846060	1
							rs1038822	rs74343467	0.8709	rs140485756	rs77918211	1
							rs1038822	rs3752355	0.8709	rs140485756	rs16867669	1
							rs1038822	rs6544644	0.8708	rs140485756	rs60879050	1
							rs1038822	rs6544671	0.8665	rs140485756	rs73472700	1
							rs1038822	rs871852	0.8623	rs140485756	rs73484709	1
							rs1038822	rs7563201	0.853	rs140485756	rs73484716	1
							rs1038822	rs7589428	0.8487	rs140485756	rs57676619	1
							rs1038822	rs145706702	0.8449	rs140485756	rs61000618	1
							rs1038822	rs11899260	0.84	rs140485756	rs57832262	1
							rs1038822	rs11888640	0.84	rs140485756	rs73484721	1
							rs1038822	rs11693801	0.8397	rs140485756	rs138778552	1
							rs1038822	rs13013639	0.8288	rs140485756	rs73484730	1
							rs1038822	rs57758828	0.8281	rs140485756	rs6916592	1
							rs1038822	rs59470270	0.8241	rs140485756	rs148752367	1
							rs1038822	rs13016288	0.8237	rs140485756	rs137975225	1
							rs1038822	rs10179648	0.818	rs140485756	rs141830910	1
							rs1038822	rs1465618	0.809	rs140485756	rs375924157	1
							rs1038822	rs72613902	0.8076	rs140485756	rs187728550	1
							rs1038822	rs11124930	0.8017	rs140485756	rs9766343	1
							rs1038822	rs1491508	0.8017	rs140485756	rs373645176	1
							rs1038822	rs4146253	0.8017	rs140485756	rs369023775	1
							rs1038822	rs13022691	0.7962	rs140485756	rs533276528	1
							rs1038822	rs6730757	0.7932	rs140485756	rs546756454	1
							rs1038822	rs34640832	0.7903	rs140485756	rs9766302	1
							rs1038822	rs6714624	0.7875	rs140485756	rs76739575	1
							rs1038822	rs6738189	0.7757	rs140485756	rs77609266	1
							rs1038822	rs7583837	0.7754	rs140485756	rs60981437	1
							rs1038822	rs7599137	0.7754	rs140485756	rs61500158	1
							rs1038822	rs150495967	0.7754	rs140485756	rs12110894	1
							rs1038822	rs1873555	0.7754	rs140485756	rs12110376	1
							rs1038822	rs9973398	0.7754	rs140485756	rs9942431	1
							rs1038822	rs6756710	0.7754	rs140485756	rs1934305	1
							rs1038822	rs6712861	0.7754	rs140485756	rs16867738	1
							rs1038822	rs881477	0.7754	rs140485756	rs73484755	1
							rs1038822	rs881476	0.7754	rs140485756	rs16867744	1
							rs1038822	rs11897732	0.7722	rs140485756	rs7769873	1
							rs1038822	rs10164789	0.7715	rs140485756	rs73468512	1
							rs1038822	rs56304210	0.7712	rs140485756	rs59802554	1
							rs1038822	rs1873556	0.7712	rs140485756	rs75487085	1
							rs1038822	rs7605725	0.7709	rs140485756	rs6930379	0.9657
							rs1038822	rs17031065	0.7707	rs140485756	rs141218239	0.9657
							rs1038822	rs11898207	0.7707	rs140485756	rs138577234	0.9657
							rs1038822	rs6744642	0.7695	rs140485756	rs6939871	0.9657
							rs1038822	rs6730500	0.767	rs140485756	rs6940595	0.9657
							rs1038822	rs11903287	0.767	rs140485756	rs143356622	0.9657
							rs1038822	rs13000971	0.767	rs140485756	rs57678635	0.9645
							rs1038822	rs59669565	0.767	rs140485756	rs141988480	0.9645
							rs1038822	rs12990267	0.7665	rs140485756	rs79016164	0.9336
							rs1038822	rs7578245	0.7665	rs140485756	rs180722194	0.9035
							rs1038822	rs76896890	0.7665	rs140485756	rs146937602	0.9035
							rs1038822	rs74776407	0.7665	rs140485756	rs117901515	0.9035
							rs1038822	rs141311393	0.7665	rs140485756	rs7771752	0.9035
							rs1038822	rs10865192	0.7665	rs140485756	rs73468524	0.9035
							rs1038822	rs12470831	0.7665	rs140485756	rs7754434	0.9035
							rs1038822	rs6731009	0.7663	rs140485756	rs112829039	0.9035
							rs1038822	rs13021894	0.7663	rs140485756	rs16867769	0.9035
							rs1038822	rs3042329	0.7631	rs140485756	rs75647542	0.9035
							rs1038822	rs57477603	0.7628	rs140485756	rs117133773	0.9035
							rs1038822	rs6725776	0.7628	rs140485756	rs78147928	0.9035
							rs1038822	rs2011979	0.7628	rs140485756	rs73468530	0.8752
							rs1038822	rs6730741	0.7625	rs140485756	rs73468534	0.8752
							rs1038822	rs78870521	0.7621	rs140485756	rs11964609	0.8752
							rs1038822	rs150227913	0.7621	rs140485756	rs73468550	0.8752
							rs1038822	rs11899823	0.7621	rs140485756	rs75484885	0.8683
							rs1038822	rs12477928	0.7621	rs140485756	rs74455984	0.8486
							rs1038822	rs12477964	0.7621	rs140485756	rs143795566	0.7774
							rs1038822	rs4337518	0.759	rs140485756	rs7762967	0.7168
							rs1038822	rs6730316	0.759	rs140485756	rs7762198	0.7168
							rs1038822	rs6544672	0.759	rs140485756	rs6455313	0.7168
							rs1038822	rs2888875	0.759	rs140485756	rs146322199	0.7168
							rs1038822	rs7596052	0.7586	rs140485756	rs12211885	0.7168
							rs1038822	rs17031028	0.7586	rs140485756	rs6934533	0.7168
							rs1038822	rs10165527	0.7586	rs140485756	rs74217091	0.7168
							rs1038822	rs6754589	0.7586	rs140485756	rs150938912	0.7168
							rs1038822	rs6754878	0.7586	rs140485756	rs9454805	0.7168
							rs1038822	rs6726014	0.7586	rs140485756	rs149930007	0.6986
							rs1038822	rs6544670	0.7583	rs140485756	rs1928055	0.6986
							rs1038822	rs10200833	0.7579	rs140485756	rs6939864	0.6986
							rs1038822	rs7563876	0.7577	rs140485756	rs6923586	0.6986
							rs1038822	rs6705356	0.7548	rs140485756	rs202122000	0.6648
							rs1038822	rs1873558	0.7545	rs140485756	rs9454817	0.6648
							rs1038822	rs1158411	0.7545	rs140485756	rs73468522	0.6648
							rs1038822	rs970176	0.7539	rs140485756	rs73468523	0.6648
							rs1038822	rs2374551	0.7539	rs140485756	rs9346301	0.6648
							rs1038822	rs147196397	0.7537	rs140485756	rs4612124	0.6648
							rs1038822	rs1873557	0.7503	rs140485756	rs9454821	0.6648
							rs1038822	rs34512555	0.7503	rs140485756	rs9446137	0.6648
							rs1038822	rs11429002	0.7503	rs140485756	rs7772995	0.6648
							rs1038822	rs10211106	0.7498	rs140485756	rs7774826	0.6648
							rs1038822	rs11884565	0.7498	rs140485756	rs7773858	0.6648
							rs1038822	rs199721109	0.7492	rs140485756	rs7741745	0.6648
							rs1038822	rs201795193	0.7462	rs140485756	rs7746218	0.6648
							rs1038822	rs146866240	0.7462	rs140485756	rs7766027	0.6648
							rs1038822	rs34154601	0.7462	rs140485756	rs10046144	0.6648
							rs1038822	rs11884742	0.7462	rs140485756	rs10046309	0.6648
							rs1038822	rs11888482	0.7454	rs140485756	rs12200997	0.6648
							rs1038822	rs7599564	0.7452	rs140485756	rs10223531	0.6648
							rs1038822	rs6742108	0.7421	rs140485756	rs9446138	0.6648
							rs1038822	rs6758733	0.7421	rs140485756	rs9454826	0.6648
							rs1038822	rs6739345	0.7415	rs140485756	rs9454827	0.6648
							rs1038822	rs112438660	0.741	rs140485756	rs9454828	0.6648
							rs1038822	rs12468394	0.7406	rs140485756	rs9454829	0.6648
							rs1038822	rs535503344	0.7376	rs140485756	rs55670477	0.6339
							rs1038822	rs74659914	0.7373	rs140485756	rs76164614	0.5449
							rs1038822	rs35645305	0.7373	rs140485756	rs116930802	0.5445
							rs1038822	rs7572765	0.7369	rs140485756	rs150291438	0.5445
							rs1038822	rs4952990	0.7324	rs140485756	rs118037413	0.5445
							rs1038822	rs11443399	0.7324	rs140485756	rs144685640	0.5099
							rs1038822	rs12466030	0.7284	chr10:119956844	rs201226678	1
							rs1038822	rs10182489	0.7254	chr10:119956844	rs151022783	1
							rs1038822	rs6544674	0.7241	chr10:119956844	rs73423487	1
							rs1038822	rs17031056	0.7209	chr10:119956844	rs146448996	1
							rs1038822	rs35319517	0.7165	chr10:119956844	rs73423488	1
							rs1038822	rs13030651	0.7163	chr10:119956844	rs57240651	1
							rs1038822	rs11890152	0.7156	chr10:119956844	rs60772559	1
							rs1038822	rs6719534	0.7109	chr10:119956844	rs73423485	1
							rs1038822	rs71410186	0.7081	chr10:119956844	rs12413944	1
							rs1038822	rs148527005	0.7047	chr10:119956844	rs73423483	1
							rs1038822	rs17031097	0.7036	chr10:119956844	rs111413947	1
							rs1038822	rs4952992	0.7033	chr10:119956844	rs73423482	1
							rs1038822	rs144688207	0.7	chr10:119956844	rs7893856	1
							rs1038822	rs35899859	0.6995	chr10:119956844	rs112544601	1
							rs1038822	rs17031100	0.6995	chr10:119956844	rs73423478	1
							rs1038822	rs11904510	0.6966	chr10:119956844	rs12411650	1
							rs1038822	rs34859017	0.6962	chr10:119956844	rs73423495	1
							rs1038822	rs34925018	0.6955	chr10:119956844	rs112320404	1
							rs1038822	rs12052942	0.6953	chr10:119956844	rs56849022	1
							rs1038822	rs17031102	0.6953	chr10:119956844	rs73423475	1
							rs1038822	rs11891936	0.6916	chr10:119956844	rs56697180	1
							rs1038822	rs79732325	0.6914	chr10:119956844	rs73423474	1
							rs1038822	rs4340576	0.6831	chr10:119956844	rs73423499	1
							rs1038822	rs66702817	0.6827	chr10:119956844	rs12416472	1
							rs1038822	rs142959198	0.6802	chr10:119956844	rs73423500	1
							rs1038822	rs12185704	0.6759	chr10:119956844	rs73423468	1
							rs1038822	rs6716620	0.6696	chr10:119956844	rs73423467	1
							rs1038822	rs6146742	0.6696	chr10:119956844	rs58917327	1
							rs1038822	rs13017478	0.6681	chr10:119956844	rs60396676	1
							rs1038822	rs34549634	0.6675	chr10:119956844	rs12415741	1
							rs1038822	rs17030684	0.6623	chr10:119956844	rs12766969	1
							rs1038822	rs10645834	0.6496	chr10:119956844	rs73423464	1
							rs1038822	rs6712163	0.6496	chr10:119956844	rs200142230	1
							rs1038822	rs6544638	0.6496	chr10:119956844	rs1986246	1
							rs1038822	rs11900952	0.6424	chr10:119956844	rs202030077	1
							rs1038822	rs6544641	0.6375	chr10:119956844	rs73423463	1
							rs1038822	rs6544640	0.6375	chr10:119956844	rs111691211	1
							rs1038822	rs6544654	0.6353	chr10:119956844	rs73423461	1
							rs1038822	rs7558302	0.6335	chr10:119956844	rs73423460	1
							rs1038822	rs17031110	0.632	chr10:119956844	rs73425310	1
							rs1038822	rs7575635	0.6303	chr10:119956844	rs73425311	1
							rs1038822	rs13026309	0.6298	chr10:119956844	rs73423458	1
							rs1038822	rs17031112	0.6276	chr10:119956844	rs73423457	1
							rs1038822	rs34717327	0.6273	chr10:119956844	rs113350365	1
							rs1038822	rs7561670	0.6265	chr10:119956844	rs73425313	1
							rs1038822	rs67193054	0.6246	chr10:119956844	rs73425314	1
							rs1038822	rs35043804	0.6229	chr10:119956844	rs73423456	1
							rs1038822	rs6708167	0.6226	chr10:119956844	rs112295326	1
							rs1038822	rs34461850	0.6226	chr10:119956844	rs202036443	1
							rs1038822	rs6544673	0.6221	chr10:119956844	chr10:119939064	1
							rs1038822	rs35267248	0.6212	chr10:119956844	rs73423454	1
							rs1038822	rs7580013	0.6183	chr10:119956844	rs7903050	1
							rs1038822	rs6749927	0.592	chr10:119956844	rs73423453	1
							rs1038822	rs35186748	0.584	chr10:119956844	rs73423451	1
							rs1038822	rs35111198	0.5804	chr10:119956844	rs113764423	1
							rs1038822	rs13417665	0.5676	chr10:119956844	rs7916602	1
							rs1038822	rs7595299	0.5667	chr10:119956844	rs12414439	1
							rs1038822	rs13429458	0.5631	chr10:119956844	rs199943719	1
							rs1038822	rs72616903	0.5497	chr10:119956844	rs112182324	1
							rs1038822	rs72613901	0.5496	chr10:119956844	rs73423441	1
							rs1038822	rs13402827	0.5461	chr10:119956844	rs58682143	1
							rs1038822	rs72613900	0.5451	chr10:119956844	rs73423436	1
							rs1038822	rs6749108	0.5344	chr10:119956844	rs116628030	1
							rs1038822	rs72613899	0.5137	chr10:119956844	rs114922943	1
							rs1038822	rs34513683	0.5081	chr10:119956844	rs12413669	1
							rs7559891	rs7559891	1	chr10:119956844	rs73423433	1
							rs7559891	rs11896747	0.9765	chr10:119956844	rs59857276	1
							rs7559891	rs1038822	0.944	chr10:119956844	rs73423432	1
							rs7559891	rs12478601	0.9439	chr10:119956844	rs73423431	1
							rs7559891	rs6751622	0.9394	chr10:119956844	rs61022212	1
							rs7559891	rs6746064	0.9217	chr10:119956844	rs59411160	1
							rs7559891	rs999949	0.9167	chr10:119956844	rs112591780	1
							rs7559891	rs13032919	0.9165	chr10:119956844	rs73423427	1
							rs7559891	rs74343467	0.9073	chr10:119956844	rs73423424	1
							rs7559891	rs6544661	0.9035	chr10:119956844	rs73423423	1
							rs7559891	rs6544671	0.9028	chr10:119956844	rs112443826	1
							rs7559891	rs13423972	0.8984	chr10:119956844	rs73423414	1
							rs7559891	rs6761913	0.8939	chr10:119956844	rs73423409	1
							rs7559891	rs10186921	0.8939	chr10:119956844	rs73423406	1
							rs7559891	rs7600872	0.8937	chr10:119956844	rs73423404	0.8871
							rs7559891	rs10650807	0.8937	chr10:119956844	rs73421502	0.8871
							rs7559891	rs6544660	0.8937	chr10:119956844	rs113874943	0.8871
							rs7559891	rs1807866	0.8893	chr10:119956844	rs148580125	0.8871
							rs7559891	rs1472100	0.8893	chr10:119956844	rs73421500	0.8871
							rs7559891	rs3752355	0.8892	chr10:119956844	rs853596	0.8871
							rs7559891	rs7591218	0.8852	chr10:119956844	rs73421496	0.8871
							rs7559891	rs12990177	0.8848	chr10:119956844	rs113749789	0.8871
							rs7559891	rs145706702	0.8805	chr10:119956844	rs73421490	0.8871
							rs7559891	rs7582497	0.8715	chr10:119956844	rs73421488	0.8871
							rs7559891	rs7568365	0.8715	chr10:119956844	rs7081772	0.8871
							rs7559891	rs7567607	0.8715	chr10:119956844	rs7081500	0.8871
							rs7559891	rs11899260	0.8669	chr10:119956844	rs73421487	0.8871
							rs7559891	rs11888640	0.8669	chr10:119956844	rs73421486	0.8871
							rs7559891	rs10176241	0.8635	chr10:119956844	rs112291371	0.8871
							rs7559891	rs7569721	0.8628	chr10:119956844	rs73413612	0.8871
							rs7559891	rs6544644	0.8624	chr10:119956844	rs7079687	0.8871
							rs7559891	rs7355361	0.8592	chr10:119956844	rs7075967	0.8871
							rs7559891	rs12712881	0.8592	chr10:119956844	rs12411826	0.8871
							rs7559891	rs6544659	0.8537	chr10:119956844	rs12415796	0.8871
							rs7559891	rs57758828	0.8457	chr10:119956844	rs73413605	0.8871
							rs7559891	rs10179648	0.8447	chr10:119956844	rs12411449	0.8871
							rs7559891	rs871852	0.8363	chr10:119956844	rs12415427	0.8871
							rs7559891	rs7563201	0.8359	chr10:119956844	rs201400224	0.8871
							rs7559891	rs7589428	0.8316	chr10:119956844	rs115498954	0.8871
							rs7559891	rs11693801	0.8054	chr10:119956844	rs12411349	0.8871
							rs7559891	rs1491508	0.8028	chr10:119956844	rs199881733	0.8871
							rs7559891	rs1465618	0.8011	chr10:119956844	rs73413603	0.8871
							rs7559891	rs12990267	0.7937	chr10:119956844	rs73411902	0.8871
							rs7559891	rs7578245	0.7937	chr10:119956844	rs73411900	0.8871
							rs7559891	rs74776407	0.7937	chr10:119956844	rs73411899	0.8871
							rs7559891	rs56304210	0.7898	chr10:119956844	rs73411898	0.8871
							rs7559891	rs147196397	0.7895	chr10:119956844	rs7094354	0.8871
							rs7559891	rs78870521	0.7892	chr10:119956844	rs7098526	0.8871
							rs7559891	rs6738189	0.7856	chr10:119956844	rs12412293	0.8871
							rs7559891	rs13013639	0.7856	chr10:119956844	rs73411894	0.8871
							rs7559891	rs6730757	0.7856	chr10:119956844	rs58558267	0.8871
							rs7559891	rs7583837	0.7853	chr10:119956844	rs73411893	0.8871
							rs7559891	rs7599137	0.7853	chr10:119956844	rs58836611	0.8871
							rs7559891	rs150495967	0.7853	chr10:119956844	rs35239533	0.8871
							rs7559891	rs1873555	0.7853	chr10:119956844	rs5788286	0.8871
							rs7559891	rs9973398	0.7853	chr10:119956844	rs112057256	0.8871
							rs7559891	rs6756710	0.7853	chr10:119956844	rs57480798	0.8871
							rs7559891	rs6712861	0.7853	chr10:119956844	rs73411886	0.8871
							rs7559891	rs881477	0.7853	chr10:119956844	rs73411885	0.8871
							rs7559891	rs881476	0.7853	chr10:119956844	rs73411882	0.8871
							rs7559891	rs141311393	0.785	chr10:119956844	rs12415902	0.8871
							rs7559891	rs199721109	0.7847	chr10:119956844	rs12413202	0.8871
							rs7559891	rs72613902	0.7823	chr10:119956844	rs12413191	0.8871
							rs7559891	rs3042329	0.7819	chr10:119956844	rs1764179	0.8871
							rs7559891	rs6725776	0.7814	chr10:119956844	rs150141550	0.8871
							rs7559891	rs10164789	0.7814	chr10:119956844	rs113902468	0.8871
							rs7559891	rs2011979	0.7814	chr10:119956844	rs570271869	0.8871
							rs7559891	rs1873556	0.7811	chr10:119956844	rs73411877	0.8871
							rs7559891	rs59470270	0.7811	chr10:119956844	rs73411874	0.8871
							rs7559891	rs13016288	0.7808	chr10:119956844	rs80276696	0.8871
							rs7559891	rs17031065	0.7805	chr10:119956844	rs853633	0.8871
							rs7559891	rs11898207	0.7805	chr10:119956844	rs73411869	0.8871
							rs7559891	rs6714624	0.7799	chr10:119956844	rs73411868	0.8871
							rs7559891	rs4337518	0.7777	chr10:119956844	rs73411867	0.8871
							rs7559891	rs6730316	0.7777	chr10:119956844	rs112233120	0.8871
							rs7559891	rs6544672	0.7777	chr10:119956844	rs73411864	0.8871
							rs7559891	rs2888875	0.7777	chr10:119956844	rs150699742	0.8871
							rs7559891	rs7596052	0.7773	chr10:119956844	rs73411862	0.8871
							rs7559891	rs17031028	0.7773	chr10:119956844	rs113656221	0.8871
							rs7559891	rs10165527	0.7773	chr10:119956844	rs12412645	0.8871
							rs7559891	rs6754589	0.7773	chr10:119956844	rs73411859	0.8871
							rs7559891	rs6754878	0.7773	chr10:119956844	rs73411857	0.8871
							rs7559891	rs6726014	0.7773	chr10:119956844	rs73411854	0.8871
							rs7559891	rs6544670	0.7769	chr10:119956844	rs853584	0.8871
							rs7559891	rs6730500	0.7769	chr10:119956844	rs73411849	0.8871
							rs7559891	rs11903287	0.7769	chr10:119956844	rs12413984	0.8871
							rs7559891	rs13000971	0.7769	chr10:119956844	rs73411845	0.8871
							rs7559891	rs59669565	0.7769	chr10:119956844	rs60706715	0.8871
							rs7559891	rs4146253	0.7766	chr10:119956844	rs202027213	0.8871
							rs7559891	rs76896890	0.7763	chr10:119956844	rs73411843	0.8871
							rs7559891	rs12470831	0.7763	chr10:119956844	rs73411842	0.8871
							rs7559891	rs6731009	0.776	chr10:119956844	rs73411838	0.8871
							rs7559891	rs13021894	0.776	chr10:119956844	rs113690806	0.8871
							rs7559891	rs34640832	0.774	chr10:119956844	rs73411833	0.8871
							rs7559891	rs201795193	0.7736	chr10:119956844	rs73411832	0.8871
							rs7559891	rs1873558	0.7731	chr10:119956844	rs73411829	0.8871
							rs7559891	rs57477603	0.7727	chr10:119956844	rs73411825	0.8871
							rs7559891	rs970176	0.7724	chr10:119956844	rs112537621	0.8423
							rs7559891	rs6730741	0.7724	chr10:119956844	rs1229489617	0.8339
							rs7559891	rs150227913	0.7718	chr10:119956844	rs200533172	0.8339
							rs7559891	rs11899823	0.7718	chr10:119956844	rs853628	0.8339
							rs7559891	rs12477928	0.7718	chr10:119956844	rs200753946	0.8339
							rs7559891	rs12477964	0.7718	chr10:119956844	rs853585	0.8339
							rs7559891	rs1873557	0.769	chr10:119956844	rs186048719	0.8339
							rs7559891	rs6739345	0.7686	chr10:119956844	rs7897130	0.8339
							rs7559891	rs11124930	0.7685	chr10:119956844	rs56767064	0.7442
							rs7559891	rs10211106	0.7682	chr10:119956844	rs12415584	0.6403
							rs7559891	rs11884565	0.7682	chr10:119956844	rs17097183	0.5371
							rs7559891	rs6705356	0.7648	rs112137861	rs112137861	1
							rs7559891	rs11884742	0.7648	rs112137861	rs111362066	0.9808
							rs7559891	rs11897732	0.7648	rs112137861	rs73267705	0.9808
							rs7559891	rs74659914	0.7644	rs112137861	rs76721320	0.9623
							rs7559891	rs1158411	0.7644	rs112137861	rs76591186	0.9623
							rs7559891	rs2374551	0.7637	rs112137861	rs76794929	0.9612
							rs7559891	rs11888482	0.7637	rs112137861	rs74517300	0.9427
							rs7559891	rs13022691	0.7627	rs112137861	rs77837243	0.9427
							rs7559891	rs34512555	0.7603	rs112137861	rs76203501	0.9427
							rs7559891	rs112438660	0.7593	rs112137861	rs117846426	0.8844
							rs7559891	rs146866240	0.7562	rs112137861	rs79032937	0.8844
							rs7559891	rs34154601	0.7562	rs112137861	rs139563978	0.8651
							rs7559891	rs6742108	0.7521	rs112137861	rs11047127	0.8473
							rs7559891	rs6758733	0.7521	rs112137861	rs75857922	0.8265
							rs7559891	rs10182489	0.7508	rs74585555	rs74585555	1
							rs7559891	rs35645305	0.7472	rs74585555	rs111684227	0.9284
							rs7559891	rs7605725	0.7464	rs74585555	rs12475995	0.9023
							rs7559891	rs7599564	0.7464	rs74585555	rs77536422	0.8897
							rs7559891	rs11443399	0.742	rs74585555	rs112094048	0.8627
							rs7559891	rs148527005	0.7403	rs74585555	rs75232168	0.7016
							rs7559891	rs17031056	0.7394	rs74585555	rs74895606	0.6874
							rs7559891	rs12466030	0.7381	rs74585555	rs75557250	0.6817
							rs7559891	rs7572765	0.7381	rs74585555	rs13000313	0.6534
							rs7559891	rs6744642	0.7362	rs74585555	rs13001181	0.6448
							rs7559891	rs35319517	0.7349	rs74585555	rs4361148	0.6311
[truncated: 7,870 more rows]

## Sheet: Table S1.2
Table S1.2 Clinically investigated and experimental drug targets for PCOS retrieved from ChEMBL-Gold Standard Positive (GSP)
Molecule Name	Target Symbol	Target Name	Maximal clinical phase for PCOS indication
ATORVASTATIN	HMGCR	HMG-CoA reductase	2
CYPROTERONE ACETATE	AR	Androgen Receptor	2
PAVINETANT	TACR3	Neurokinin 3 receptor	2
ALFACALCIDOL	VDR	Vitamin D receptor	2
ELAGOLIX	GNRHR	Gonadotropin-releasing hormone receptor	2
CYPROTERONE ACETATE	NR3C1	Glucocorticoid receptor	2
CYPROTERONE ACETATE	PGR	Progesterone receptor	2
PROGESTERONE	PGR	Progesterone receptor	2
ORLISTAT	LIPF	Gastric lipase	2
ORLISTAT	PNLIP	Pancreatic lipase	2
SPIRONOLACTONE	NR3C2	Mineralocorticoid receptor	2
PIOGLITAZONE	PPARG	Peroxisome proliferator-activated receptor gamma	2
SEMAGLUTIDE	GLP1R	Glucagon-like peptide 1 receptor	2
CHORIOGONADOTROPIN ALFA	LHCGR	Luteinizing hormone/Choriogonadotropin receptor	2
LICOGLIFLOZIN	SLC5A1	Sodium/glucose cotransporter 1	2
LICOGLIFLOZIN	SLC5A2	Sodium/glucose cotransporter 2	2
FLUTAMIDE	AR	Androgen Receptor	2
ANAKINRA	IL1R1	Interleukin-1 receptor	2
EXENATIDE	GLP1R	Glucagon-like peptide 1 receptor	2
EMPAGLIFLOZIN	SLC5A2	Sodium/glucose cotransporter 2	2
FOLLITROPIN	FSHR	Follicle stimulating hormone receptor	2
SIMVASTATIN	HMGCR	HMG-CoA reductase	3
CHOLECALCIFEROL	VDR	Vitamin D receptor	3
CETRORELIX	GNRHR	Gonadotropin-releasing hormone receptor	3
DROSPIRENONE	PGR	Progesterone receptor	3
DESOGESTREL	PGR	Progesterone receptor	3
GONADOTROPIN, CHORIONIC	LHCGR	Luteinizing hormone/Choriogonadotropin receptor	3
MENOTROPINS	LHCGR	Luteinizing hormone/Choriogonadotropin receptor	3
DROSPIRENONE	NR3C2	Mineralocorticoid receptor	3
ENCLOMIPHENE	ESR1	Estrogen receptor alpha	3
RALOXIFENE	ESR2	Estrogen receptor beta	3
MENOTROPINS	FSHR	Follicle stimulating hormone receptor	3
SAXAGLIPTIN ANHYDROUS	DPP4	Dipeptidyl peptidase IV	3
ERGOCALCIFEROL	VDR	Vitamin D receptor	3
DAPAGLIFLOZIN	SLC5A2	Sodium/glucose cotransporter 2	3
LETROZOLE	CYP19A1	Cytochrome P450 19A1	3
ETHINYL ESTRADIOL	ESR1	Estrogen receptor alpha	3
CLOMIPHENE	ESR1	Estrogen receptor alpha	4

## Sheet: Table S1.3
Table S1.3 Sources and datasets (functional genomics information) used for PCOS variant-to-gene mapping
Evidence category	Evidence type	Data source	Tissue group	Dataset
rGene	ChromHMM	PMID25693563	Ovary	E097_Ovary
		PMID25693563	Adipose	E063_Adipose nuclei
		PMID25693563	Liver	E066_Liver
		PMID25693563	Muscle	E100_Psoas muscle, E120_HSMM skeletal muscle myoblasts, E121_HSMM-derived skeletal muscle myotubes, E052_Muscle satellite, E108_Skeletal muscle female
		PMID25693563	Pancreas	E098_Pancreas, E087_Pancreatic islets
		PMID25693563	Brain	E073_Brain dorsolateral prefrontal corrtex
	TAD	PMID27851967	Ovary	Ovary
		NA	Adipose	NA
		PMID27851967	Liver	Liver
		PMID27851967	Muscle	Psoas muscle
		PMID27851967	Pancreas	Pancreas
		PMID27851967	Brain	Prefrontal cortex
qGene	EAS QTL	QTLbase	Ovary+Plasma	eQTL_1332, pQTL_1407
		QTLbase	Adipose+Plasma	eQTL_1297, eQTL_1298, pQTL_1407, sQTL_1346, sQTL_1347
		QTLbase	Liver+Plasma	eQTL_191, eQTL_473, eQTL_1327, pQTL_1407
		QTLbase	Muscle+Plasma	eQTL_1330, pQTL_1407, sQTL_1379
		QTLbase	Pancreas+Plasma	eQTL_1333, eQTL_1335, pQTL_1407, sQTL_1382
		QTLbase	Brain+Plasma	eQTL_207, eQTL_876, eQTL_1308, eQTL_1309, pQTL_1201, pQTL_1407
		GTEx+QTLbase	Pituitary+Plasma	GTExV7_Pituitary, pQTL_1407
	EUR QTL	QTLbase	Ovary+Plasma	eQTL_1332, pQTL_1407, sQTL_1381
		QTLbase	Adipose+Plasma	apaQTL_1156, apaQTL_1157, eQTL_238, eQTL_567, eQTL_1297, eQTL_1298, pQTL_1407, sQTL_1346, sQTL_1347
		QTLbase	Liver+Plasma	eQTL_716, eQTL_191, eQTL_701, eQTL_585, eQTL_1327, pQTL_1407
		QTLbase	Muscle+Plasma	apaQTL_1180, bQTL_1149, eQTL_1330, pQTL_1407, sQTL_1379
		QTLbase	Pancreas+Plasma	apaQTL_1185, eQTL_1333, eQTL_1335, pQTL_1407, sQTL_1384
		QTLbase	Brain+Plasma	eQTL_207, eQTL_876, eQTL_1308, eQTL_1309, pQTL_1200, pQTL_1201, pQTL_1407, sQTL_1357
		GTEx+QTLbase	Pituitary+Plasma	GTExV7_Pituitary, pQTL_1407
cGene	DNase-seq	ENCODE	Ovary	ENCFF137NDD
		ENCODE	Adipose	ENCFF519QGD
		ENCODE	Liver	ENCFF434AMR
		ENCODE	Muscle	ENCFF502LIU
		ENCODE	Pancreas	ENCFF309RKI
		ENCODE	Brain	NA
	Histone ChIP-seq(H3K27Ac)	ENCODE	Ovary	ENCFF052RXC
		ENCODE	Adipose	ENCFF943PDN
		ENCODE	Liver	ENCFF395RUY
		ENCODE	Muscle	ENCFF239PAA
		ENCODE	Pancreas	ENCFF641GBA
		ENCODE	Brain	NA
	polyA plus RNA-seq	ENCODE	Ovary	ENCFF050GYO
		ENCODE	Adipose	ENCFF743DUT
		ENCODE	Liver	ENCFF880OSE
		ENCODE	Muscle	ENCFF319TYA
		ENCODE	Pancreas	ENCFF170MOO
		ENCODE	Brain	NA
	Hi-C	PMID29106613	Ovary	Ovary
		PMID29666371	Adipose	Adipose
		PMID29106613	Liver	Liver
		PMID29106613	Muscle	Psoas muscle
		PMID29106613	Pancreas	Pancreas
		PMID38631345	Brain	PMID31501517_DorsolateralPrefrontalCortex
* For pitutary tissue, there were no datasets reporting functional genomics or regulatory information.
