# Supplementary material for: Evidence-based genetic variants to gene mapping and prioritization uncovers distinct molecular pathophysiology and therapeutic landscape in polycystic ovary syndrome patients of different ethnicities.
Source: Research Square preprint supplement (doi:10.21203/rs.3.rs-8610143/v1), 2026-01-22
Supplement: Supplementary file 8 [file e5e9a713201bc19dc7947970.xlsx]

## Sheet: Table S4.1
Table S4.1 PCOS drug target set enrichment scores and ranks of East Asian
Ovary			Adipose			Liver			Muscle			Pancreas			Cortex			Pituitary
Target	Rank in prioritized list	Enrichment score	Target	Rank in prioritized list	Enrichment score	Target	Rank in prioritized list	Enrichment score	Target	Rank in prioritized list	Enrichment score	Target	Rank in prioritized list	Enrichment score	Target	Rank in prioritized list	Enrichment score	Target	Rank in prioritized list	Enrichment score
FSHR	6	0.102169	LHCGR	2	0.114894	FSHR	6	0.102493	FSHR	203	0.0774013	ESR1	176	0.0786928	FSHR	47	0.0897795	ESR1	176	0.0786928
LHCGR	7	0.203439	FSHR	19	0.214207	LHCGR	32	0.18791	AR	267	0.157871	ESR2	208	0.165234	ESR1	277	0.157612	ESR2	208	0.165234
ESR1	122	0.275604	GLP1R	146	0.281799	ESR1	123	0.264462	ESR1	279	0.240851	FSHR	290	0.245077	ESR2	373	0.229094	FSHR	290	0.245077
AR	200	0.347031	ESR1	170	0.354129	PPARG	136	0.345142	PNLIP	360	0.316536	AR	347	0.324353	AR	594	0.287357	AR	347	0.324353
ESR2	374	0.406834	ESR2	211	0.422685	ESR2	286	0.41402	ESR2	590	0.377446	PGR	908	0.361105	CYP19A1	780	0.345096	PGR	908	0.361105
PGR	549	0.464109	AR	314	0.483911	AR	407	0.481518	LHCGR	610	0.450327	LHCGR	1044	0.421352	NR3C1	847	0.408724	LHCGR	1044	0.421352
NR3C1	728	0.517793	NR3C1	630	0.527117	GLP1R	567	0.542045	PPARG	836	0.506779	NR3C1	1082	0.486713	LHCGR	1037	0.462942	NR3C1	1082	0.486713
GLP1R	1015	0.56243	DPP4	1088	0.556504	NR3C1	665	0.603136	NR3C1	931	0.569465	PPARG	1359	0.535047	PPARG	1241	0.513829	PPARG	1359	0.535047
PPARG	1169	0.613796	PPARG	1112	0.610418	PGR	1379	0.619074	PGR	970	0.634478	CYP19A1	3323	0.472081	PGR	1371	0.567955	CYP19A1	3323	0.472081
			PGR	1214	0.658321	DPP4	2744	0.58522	GLP1R	1519	0.661184	GLP1R	3387	0.517271	NR3C2	1970	0.590421	GLP1R	3387	0.517271
						VDR	2887	0.621119				DPP4	3812	0.539276	GLP1R	3158	0.571452	DPP4	3812	0.539276
						CYP19A1	3089	0.652528				NR3C2	4264	0.558218	IL1R1	3366	0.607133	NR3C2	4264	0.558218
						PNLIP	3368	0.677966				VDR	4945	0.560917				VDR	4945	0.560917

## Sheet: Table S4.2
Table S4.2 PCOS drug target set enrichment scores and ranks of European
Ovary			Adipose			Liver			Muscle			Pancreas			Cortex			Pituitary
Target	Rank in prioritized list	Enrichment score	Target	Rank in prioritized list	Enrichment score	Target	Rank in prioritized list	Enrichment score	Target	Rank in prioritized list	Enrichment score	Target	Rank in prioritized list	Enrichment score	Target	Rank in prioritized list	Enrichment score	Target	Rank in prioritized list	Enrichment score
FSHR	58	0.0906967	AR	42	0.103379	ESR1	181	0.079197	AR	48	0.098713	AR	20	0.104753	FSHR	47	0.0897795	AR	20	0.104753
AR	64	0.183551	ESR1	107	0.198092	FSHR	191	0.167928	ESR1	124	0.186593	ESR1	112	0.19596	ESR1	277	0.157612	ESR1	112	0.19596
ESR1	95	0.27228	PPARG	444	0.261149	AR	223	0.253776	FSHR	125	0.278808	FSHR	324	0.268826	ESR2	373	0.229094	FSHR	324	0.268826
ESR2	297	0.341804	ESR2	457	0.342567	ESR2	375	0.326376	ESR2	550	0.333074	PPARG	375	0.349741	AR	594	0.287357	PPARG	375	0.349741
PPARG	509	0.4065	FSHR	479	0.422869	PPARG	449	0.400476	PPARG	570	0.410474	ESR2	478	0.424984	CYP19A1	780	0.345096	ESR2	478	0.424984
NR3C1	569	0.478034	NR3C1	492	0.503506	NR3C1	850	0.447471	NR3C1	715	0.476934	NR3C1	590	0.497563	NR3C1	847	0.408724	NR3C1	590	0.497563
LHCGR	1078	0.516233	PGR	1311	0.523958	LHCGR	1106	0.498251	PGR	921	0.536596	PGR	1288	0.524034	LHCGR	1037	0.462942	PGR	1288	0.524034
PGR	1256	0.570862	GLP1R	1752	0.560681	GLP1R	1114	0.562974	GLP1R	1283	0.581624	CYP19A1	2261	0.522691	PPARG	1241	0.513829	CYP19A1	2261	0.522691
CYP19A1	1307	0.632281	LHCGR	1890	0.613055	CYP19A1	1383	0.609003	LHCGR	1574	0.62605	VDR	2601	0.555852	PGR	1371	0.567955	VDR	2601	0.555852
GLP1R	2494	0.616086	CYP19A1	3070	0.59262	PGR	1480	0.663833	CYP19A1	1900	0.664324	LHCGR	2847	0.59132	NR3C2	1970	0.590421	LHCGR	2847	0.59132
DPP4	2531	0.666673	IL1R1	3336	0.623615	DPP4	2246	0.672207	VDR	2394	0.687668	IL1R1	3029	0.628869	GLP1R	3158	0.571452	IL1R1	3029	0.628869
VDR	2543	0.718591	DPP4	3360	0.668548				HMGCR	3710	0.651665	GLP1R	3186	0.666759	IL1R1	3366	0.607133	GLP1R	3186	0.666759
			VDR	3394	0.712723				DPP4	4164	0.662745
									IL1R1	4293	0.691535

## Sheet: Table S4.3
Table S4.3 Repurposing potential of leading-edge PCOS drug targets: approved drugs and indications
Population	Traget	Indication/disease	Approved drug(Mechanism of action)
EAS & EUR	AR	acne	Clascoterone(Androgen Receptor antagonist)
		breast cancer	Methyltestosterone(Androgen Receptor agonist)
		breast fibrocystic disease	Danazol(Androgen Receptor agonist)
		cancer	Abiraterone(Androgen Receptor antagonist)
		cancer	Apalutamide(Androgen Receptor antagonist)
		cancer	Darolutamide(Androgen Receptor antagonist)
		cancer	Enzalutamide(Androgen Receptor antagonist)
		cancer	Testosterone(Androgen Receptor agonist)
		carcinoma	Bicalutamide(Androgen Receptor antagonist)
		carcinoma	Flutamide(Androgen Receptor antagonist)
		endometriosis	Danazol(Androgen Receptor agonist)
		hypogonadism	Fluoxymesterone(Androgen Receptor agonist)
		hypogonadism	Methyltestosterone(Androgen Receptor agonist)
		hypogonadism	Testosterone Cypionate(Androgen Receptor agonist)
		hypogonadism	Testosterone Enanthate(Androgen Receptor agonist)
		hypogonadism	Testosterone Undecanoate(Androgen Receptor agonist)
		hypogonadism	Testosterone(Androgen Receptor agonist)
		Hypogonadotropic hypogonadism	Testosterone Enanthate(Androgen Receptor agonist)
		hypogonadotropic hypogonadism	Testosterone Undecanoate(Androgen Receptor agonist)
		hypogonadotropic hypogonadism	Testosterone(Androgen Receptor agonist)
		Klinefelter's syndrome	Testosterone Undecanoate(Androgen Receptor agonist)
		Klinefelter's syndrome	Testosterone(Androgen Receptor agonist)
		metastatic prostate cancer	Apalutamide(Androgen Receptor antagonist)
		metastatic prostate cancer	Darolutamide(Androgen Receptor antagonist)
		metastatic prostate cancer	Enzalutamide(Androgen Receptor antagonist)
		metastatic prostate cancer	Flutamide(Androgen Receptor antagonist)
		metastatic prostate cancer	Nilutamide(Androgen Receptor antagonist)
		neoplasm	Abiraterone(Androgen Receptor antagonist)
		neoplasm	Apalutamide(Androgen Receptor antagonist)
		neoplasm	Bicalutamide(Androgen Receptor antagonist)
		neoplasm	Darolutamide(Androgen Receptor antagonist)
		neoplasm	Enzalutamide(Androgen Receptor antagonist)
		neoplasm	Fluoxymesterone(Androgen Receptor agonist)
		neoplasm	Flutamide(Androgen Receptor antagonist)
		neoplasm	Nilutamide(Androgen Receptor antagonist)
		neoplasm	Testosterone Cypionate(Androgen Receptor agonist)
		neoplasm	Testosterone Enanthate(Androgen Receptor agonist)
		neoplasm	Testosterone Undecanoate(Androgen Receptor agonist)
		neoplasm	Testosterone(Androgen Receptor agonist)
		orchitis	Fluoxymesterone(Androgen Receptor agonist)
		orchitis	Methyltestosterone(Androgen Receptor agonist)
		orchitis	Testosterone Cypionate(Androgen Receptor agonist)
		orchitis	Testosterone Enanthate(Androgen Receptor agonist)
		orchitis	Testosterone Undecanoate(Androgen Receptor agonist)
		orchitis	Testosterone(Androgen Receptor agonist)
		prostate adenocarcinoma	Apalutamide(Androgen Receptor antagonist)
		prostate adenocarcinoma	Darolutamide(Androgen Receptor antagonist)
		prostate adenocarcinoma	Enzalutamide(Androgen Receptor antagonist)
		prostate adenocarcinoma	Flutamide(Androgen Receptor antagonist)
		prostate adenocarcinoma	Nilutamide(Androgen Receptor antagonist)
		prostate cancer	Apalutamide(Androgen Receptor antagonist)
		prostate cancer	Darolutamide(Androgen Receptor antagonist)
		prostate cancer	Enzalutamide(Androgen Receptor antagonist)
		prostate cancer	Nilutamide(Androgen Receptor antagonist)
		prostate carcinoma	Apalutamide(Androgen Receptor antagonist)
		prostate carcinoma	Darolutamide(Androgen Receptor antagonist)
		prostate carcinoma	Enzalutamide(Androgen Receptor antagonist)
		prostate carcinoma	Flutamide(Androgen Receptor antagonist)
		prostate neoplasm	Darolutamide(Androgen Receptor antagonist)
		sexual dysfunction	Testosterone(Androgen Receptor agonist)
EUR	CYP19A1	breast cancer	Anastrozole(Cytochrome P450 19A1 inhibitor)
		breast cancer	Exemestane(Cytochrome P450 19A1 inhibitor)
		breast cancer	Letrozole(Cytochrome P450 19A1 inhibitor)
		breast carcinoma	Anastrozole(Cytochrome P450 19A1 inhibitor)
		breast carcinoma	Exemestane(Cytochrome P450 19A1 inhibitor)
		breast carcinoma	Letrozole(Cytochrome P450 19A1 inhibitor)
		breast neoplasm	Anastrozole(Cytochrome P450 19A1 inhibitor)
		breast neoplasm	Exemestane(Cytochrome P450 19A1 inhibitor)
		breast neoplasm	Letrozole(Cytochrome P450 19A1 inhibitor)
		cancer	Anastrozole(Cytochrome P450 19A1 inhibitor)
		cancer	Exemestane(Cytochrome P450 19A1 inhibitor)
		neoplasm	Aminoglutethimide(Cytochrome P450 19A1 inhibitor)
		neoplasm	Anastrozole(Cytochrome P450 19A1 inhibitor)
		neoplasm	Exemestane(Cytochrome P450 19A1 inhibitor)
		neoplasm	Letrozole(Cytochrome P450 19A1 inhibitor)
EUR	DPP4	acute myocardial infarction	Sitagliptin(Dipeptidyl peptidase IV inhibitor)
		diabetes mellitus	Linagliptin(Dipeptidyl peptidase IV inhibitor)
		diabetes mellitus	Vildagliptin(Dipeptidyl peptidase IV inhibitor)
		hyperlipidemia	Sitagliptin(Dipeptidyl peptidase IV inhibitor)
		myocardial infarction	Sitagliptin(Dipeptidyl peptidase IV inhibitor)
		stroke	Sitagliptin(Dipeptidyl peptidase IV inhibitor)
		type 2 diabetes mellitus	Alogliptin(Dipeptidyl peptidase IV inhibitor)
		type 2 diabetes mellitus	Linagliptin(Dipeptidyl peptidase IV inhibitor)
		type 2 diabetes mellitus	Saxagliptin Anhydrous(Dipeptidyl peptidase IV inhibitor)
		type 2 diabetes mellitus	Sitagliptin(Dipeptidyl peptidase IV inhibitor)
		type 2 diabetes mellitus	Vildagliptin(Dipeptidyl peptidase IV inhibitor)
EAS & EUR	ESR2	Atrophic Vaginitis	Ospemifene(Estrogen receptor modulator)
		Atrophy	Estrogens, Conjugated Synthetic A(Estrogen receptor agonist)
		Atrophy	Estrogens, Conjugated(Estrogen receptor agonist)
		Atrophy	Estrogens, Esterified(Estrogen receptor agonist)
		Atrophy	Ospemifene(Estrogen receptor modulator)
		Atrophy	Synthetic Conjugated Estrogens, B(Estrogen receptor agonist)
		breast cancer	Estrogens, Conjugated(Estrogen receptor agonist)
		breast cancer	Estrogens, Esterified(Estrogen receptor agonist)
		breast cancer	Fulvestrant(Estrogen receptor antagonist)
		breast cancer	Raloxifene(Estrogen receptor beta modulator)
		breast cancer	Toremifene(Estrogen receptor modulator)
		breast carcinoma	Fulvestrant(Estrogen receptor antagonist)
		breast carcinoma	Toremifene(Estrogen receptor modulator)
		breast neoplasm	Estrogens, Conjugated(Estrogen receptor agonist)
		breast neoplasm	Fulvestrant(Estrogen receptor antagonist)
		breast neoplasm	Toremifene(Estrogen receptor modulator)
		cancer	Fulvestrant(Estrogen receptor antagonist)
		carcinoma	Estramustine Phosphate(Estrogen receptor beta modulator)
		Dyspareunia	Estrogens, Conjugated(Estrogen receptor agonist)
		Dyspareunia	Ospemifene(Estrogen receptor modulator)
		HER2 Positive Breast Carcinoma	Fulvestrant(Estrogen receptor antagonist)
		hypogonadism	Estrogens, Conjugated(Estrogen receptor agonist)
		hypogonadism	Estrogens, Esterified(Estrogen receptor agonist)
		menopause	Estrogens, Conjugated Synthetic A(Estrogen receptor agonist)
		menopause	Estrogens, Conjugated(Estrogen receptor agonist)
		menopause	Estrogens, Esterified(Estrogen receptor agonist)
		menopause	Ospemifene(Estrogen receptor modulator)
		menopause	Synthetic Conjugated Estrogens, B(Estrogen receptor agonist)
		neoplasm	Diethylstilbestrol Diphosphate(Estrogen receptor agonist)
		neoplasm	Fulvestrant(Estrogen receptor antagonist)
		osteoporosis	Estrogens, Conjugated(Estrogen receptor agonist)
		osteoporosis	Raloxifene(Estrogen receptor beta modulator)
		postmenopausal atrophic vaginitis	Estrogens, Conjugated(Estrogen receptor agonist)
		postmenopausal osteoporosis	Bazedoxifene(Estrogen receptor modulator)
		postmenopausal osteoporosis	Estrogens, Conjugated(Estrogen receptor agonist)
		postmenopausal osteoporosis	Lasofoxifene Tartrate(Estrogen receptor modulator)
		postmenopausal osteoporosis	Raloxifene(Estrogen receptor beta modulator)
		pregnancy	Estetrol(Estrogen receptor agonist)
		primary ovarian insufficiency	Estrogens, Conjugated(Estrogen receptor agonist)
		primary ovarian insufficiency	Estrogens, Esterified(Estrogen receptor agonist)
EAS & EUR	FSHR	anovulation	Follitropin Alfa(Follicle stimulating hormone receptor agonist)
		anovulation	Follitropin Delta(Follicle stimulating hormone receptor agonist)
		hypogonadism	Follitropin(Follicle stimulating hormone receptor agonist)
		Hypogonadotropic hypogonadism	Follitropin Beta(Follicle stimulating hormone receptor agonist)
		hypogonadotropic hypogonadism	Follitropin(Follicle stimulating hormone receptor agonist)
		infertility	Follitropin Beta(Follicle stimulating hormone receptor agonist)
		male infertility	Follitropin(Follicle stimulating hormone receptor agonist)
		positive regulation of ovulation	Corifollitropin Alfa(Follicle stimulating hormone receptor agonist)
		primary ovarian insufficiency	Follitropin(Follicle stimulating hormone receptor agonist)
EAS & EUR	GLP1R	diabetes mellitus	Albiglutide(Glucagon-like peptide 1 receptor agonist)
		diabetes mellitus	Dulaglutide(Glucagon-like peptide 1 receptor agonist)
		diabetes mellitus	Exenatide(Glucagon-like peptide 1 receptor agonist)
		diabetes mellitus	Liraglutide(Glucagon-like peptide 1 receptor agonist)
		diabetes mellitus	Lixisenatide(Glucagon-like peptide 1 receptor agonist)
		diabetes mellitus	Semaglutide(Glucagon-like peptide 1 receptor agonist)
		diabetes mellitus	Tirzepatide(Glucagon-like peptide 1 receptor agonist)
		MODY	Liraglutide(Glucagon-like peptide 1 receptor agonist)
		obesity	Liraglutide(Glucagon-like peptide 1 receptor agonist)
		overweight body mass index status	Liraglutide(Glucagon-like peptide 1 receptor agonist)
		type 2 diabetes mellitus	Albiglutide(Glucagon-like peptide 1 receptor agonist)
		type 2 diabetes mellitus	Dulaglutide(Glucagon-like peptide 1 receptor agonist)
		type 2 diabetes mellitus	Exenatide(Glucagon-like peptide 1 receptor agonist)
		type 2 diabetes mellitus	Liraglutide(Glucagon-like peptide 1 receptor agonist)
		type 2 diabetes mellitus	Lixisenatide(Glucagon-like peptide 1 receptor agonist)
		type 2 diabetes mellitus	Semaglutide(Glucagon-like peptide 1 receptor agonist)
		type 2 diabetes mellitus	Tirzepatide(Glucagon-like peptide 1 receptor agonist)
EAS & EUR	LHCGR	anovulation	Choriogonadotropin Alfa(Luteinizing hormone/Choriogonadotropin receptor agonist)
		female infertility	Choriogonadotropin Alfa(Luteinizing hormone/Choriogonadotropin receptor agonist)
		female infertility	Lutropin Alfa(Luteinizing hormone/Choriogonadotropin receptor agonist)
		hypogonadism	Choriogonadotropin Alfa(Luteinizing hormone/Choriogonadotropin receptor agonist)
		infertility	Choriogonadotropin Alfa(Luteinizing hormone/Choriogonadotropin receptor agonist)
		obesity	Choriogonadotropin Alfa(Luteinizing hormone/Choriogonadotropin receptor agonist)
		positive regulation of ovulation	Lutropin Alfa(Luteinizing hormone/Choriogonadotropin receptor agonist)
		primary ovarian insufficiency	Choriogonadotropin Alfa(Luteinizing hormone/Choriogonadotropin receptor agonist)
EAS & EUR	NR3C1	acne	Dexamethasone(Glucocorticoid receptor agonist)
		acne	Fluorometholone(Glucocorticoid receptor agonist)
		acne	Methylprednisolone(Glucocorticoid receptor agonist)
		adrenal gland disease	Dexamethasone(Glucocorticoid receptor agonist)
		adrenal gland disease	Hydrocortisone(Glucocorticoid receptor agonist)
		adrenal gland disease	Prednisone(Glucocorticoid receptor agonist)
		adrenal gland hyperfunction	Dexamethasone(Glucocorticoid receptor agonist)
		adrenocortical insufficiency	Dexamethasone Phosphoric Acid(Glucocorticoid receptor agonist)
		adrenocortical insufficiency	Hydrocortisone(Glucocorticoid receptor agonist)
		Airway obstruction	Beclomethasone Dipropionate(Glucocorticoid receptor agonist)
		Airway obstruction	Betamethasone(Glucocorticoid receptor agonist)
		Airway obstruction	Budesonide(Glucocorticoid receptor agonist)
		Airway obstruction	Ciclesonide(Glucocorticoid receptor agonist)
		Airway obstruction	Flunisolide(Glucocorticoid receptor agonist)
		Airway obstruction	Fluticasone Furoate(Glucocorticoid receptor agonist)
		Airway obstruction	Fluticasone Propionate(Glucocorticoid receptor agonist)
		Airway obstruction	Mometasone Furoate(Glucocorticoid receptor agonist)
		Airway obstruction	Triamcinolone(Glucocorticoid receptor agonist)
		allergic conjunctivitis	Dexamethasone Phosphoric Acid(Glucocorticoid receptor agonist)
		allergic conjunctivitis	Dexamethasone(Glucocorticoid receptor agonist)
		allergic conjunctivitis	Hydrocortisone(Glucocorticoid receptor agonist)
		allergic conjunctivitis	Loteprednol Etabonate(Glucocorticoid receptor agonist)
		allergic conjunctivitis	Prednisolone Acetate(Glucocorticoid receptor agonist)
		allergic conjunctivitis	Prednisolone Phosphoric Acid(Glucocorticoid receptor agonist)
		allergic conjunctivitis	Prednisolone(Glucocorticoid receptor agonist)
		allergic conjunctivitis	Prednisone(Glucocorticoid receptor agonist)
		allergic disease	Cortisone Acetate(Glucocorticoid receptor agonist)
		allergic rhinitis	Beclomethasone Dipropionate(Glucocorticoid receptor agonist)
		allergic rhinitis	Budesonide(Glucocorticoid receptor agonist)
		allergic rhinitis	Ciclesonide(Glucocorticoid receptor agonist)
		allergic rhinitis	Dexamethasone Phosphoric Acid(Glucocorticoid receptor agonist)
		allergic rhinitis	Dexamethasone(Glucocorticoid receptor agonist)
		allergic rhinitis	Fluticasone Furoate(Glucocorticoid receptor agonist)
		allergic rhinitis	Fluticasone Propionate(Glucocorticoid receptor agonist)
		allergic rhinitis	Mometasone Furoate(Glucocorticoid receptor agonist)
		allergic rhinitis	Prednisolone Phosphoric Acid(Glucocorticoid receptor agonist)
		allergic rhinitis	Prednisolone(Glucocorticoid receptor agonist)
		allergic rhinitis	Prednisone(Glucocorticoid receptor agonist)
		allergic rhinitis	Triamcinolone Acetonide(Glucocorticoid receptor agonist)
		anemia	Betamethasone Acetate(Glucocorticoid receptor agonist)
		anemia	Methylprednisolone Acetate(Glucocorticoid receptor agonist)
		anemia	Methylprednisolone Hemisuccinate(Glucocorticoid receptor agonist)
		anemia	Prednisolone Acetate(Glucocorticoid receptor agonist)
		anemia	Prednisolone Phosphoric Acid(Glucocorticoid receptor agonist)
		anemia	Prednisone(Glucocorticoid receptor agonist)
		anemia	Triamcinolone Acetonide(Glucocorticoid receptor agonist)
		ankylosing spondylitis	Dexamethasone Phosphoric Acid(Glucocorticoid receptor agonist)
		ankylosing spondylitis	Dexamethasone(Glucocorticoid receptor agonist)
		ankylosing spondylitis	Prednisolone(Glucocorticoid receptor agonist)
		ankylosing spondylitis	Prednisone(Glucocorticoid receptor agonist)
		anterior uveitis	Difluprednate(Glucocorticoid receptor agonist)
		anterior uveitis	Loteprednol Etabonate(Glucocorticoid receptor agonist)
		Aplastic anemia	Cortisone Acetate(Glucocorticoid receptor agonist)
		Aplastic anemia	Dexamethasone Phosphoric Acid(Glucocorticoid receptor agonist)
		Aplastic anemia	Dexamethasone(Glucocorticoid receptor agonist)
		Aplastic anemia	Prednisolone(Glucocorticoid receptor agonist)
		Aplastic anemia	Prednisone(Glucocorticoid receptor agonist)
		arthritis	Prednisone(Glucocorticoid receptor agonist)
		asthma	Beclomethasone Dipropionate(Glucocorticoid receptor agonist)
		asthma	Betamethasone Acetate(Glucocorticoid receptor agonist)
		asthma	Budesonide(Glucocorticoid receptor agonist)
		asthma	Ciclesonide(Glucocorticoid receptor agonist)
		asthma	Cortisone Acetate(Glucocorticoid receptor agonist)
		asthma	Dexamethasone Phosphoric Acid(Glucocorticoid receptor agonist)
		asthma	Dexamethasone(Glucocorticoid receptor agonist)
		asthma	Flunisolide(Glucocorticoid receptor agonist)
		asthma	Fluticasone Furoate(Glucocorticoid receptor agonist)
		asthma	Fluticasone Propionate(Glucocorticoid receptor agonist)
		asthma	Hydrocortisone Hemisuccinate Anhydrous(Glucocorticoid receptor agonist)
		asthma	Hydrocortisone(Glucocorticoid receptor agonist)
		asthma	Methylprednisolone Acetate(Glucocorticoid receptor agonist)
		asthma	Methylprednisolone Hemisuccinate(Glucocorticoid receptor agonist)
		asthma	Methylprednisolone(Glucocorticoid receptor agonist)
		asthma	Mometasone Furoate(Glucocorticoid receptor agonist)
		asthma	Prednisolone Phosphoric Acid(Glucocorticoid receptor agonist)
		asthma	Prednisolone(Glucocorticoid receptor agonist)
		asthma	Prednisone(Glucocorticoid receptor agonist)
		asthma	Triamcinolone Acetonide(Glucocorticoid receptor agonist)
		atopic eczema	Cortisone Acetate(Glucocorticoid receptor agonist)
		atopic eczema	Desonide(Glucocorticoid receptor agonist)
		atopic eczema	Dexamethasone Phosphoric Acid(Glucocorticoid receptor agonist)
		atopic eczema	Dexamethasone(Glucocorticoid receptor agonist)
		atopic eczema	Fluocinolone Acetonide(Glucocorticoid receptor agonist)
		atopic eczema	Fluticasone Propionate(Glucocorticoid receptor agonist)
		atopic eczema	Hydrocortisone Butyrate(Glucocorticoid receptor agonist)
		atopic eczema	Hydrocortisone(Glucocorticoid receptor agonist)
		atopic eczema	Methylprednisolone(Glucocorticoid receptor agonist)
		atopic eczema	Prednisolone(Glucocorticoid receptor agonist)
		atopic eczema	Prednisone(Glucocorticoid receptor agonist)
		autoimmune thrombocytopenic purpura	Cortisone Acetate(Glucocorticoid receptor agonist)
		autoimmune thrombocytopenic purpura	Dexamethasone Phosphoric Acid(Glucocorticoid receptor agonist)
		autoimmune thrombocytopenic purpura	Dexamethasone(Glucocorticoid receptor agonist)
		autoimmune thrombocytopenic purpura	Prednisone(Glucocorticoid receptor agonist)
		Becker muscular dystrophy	Vamorolone(Glucocorticoid receptor agonist)
		berylliosis	Prednisone(Glucocorticoid receptor agonist)
		brain edema	Dexamethasone Phosphoric Acid(Glucocorticoid receptor agonist)
		brain neoplasm	Methylprednisolone Acetate(Glucocorticoid receptor agonist)
		brain neoplasm	Prednisone(Glucocorticoid receptor agonist)
		bursitis	Dexamethasone(Glucocorticoid receptor agonist)
		bursitis	Hydrocortisone(Glucocorticoid receptor agonist)
		bursitis	Methylprednisolone(Glucocorticoid receptor agonist)
		bursitis	Prednisone(Glucocorticoid receptor agonist)
		bursitis	Triamcinolone Acetonide(Glucocorticoid receptor agonist)
		cancer	Dexamethasone(Glucocorticoid receptor agonist)
		cancer	Hydrocortisone(Glucocorticoid receptor agonist)
		cancer	Prednisone(Glucocorticoid receptor agonist)
		Chorioretinitis	Dexamethasone Phosphoric Acid(Glucocorticoid receptor agonist)
		Chorioretinitis	Dexamethasone(Glucocorticoid receptor agonist)
		Chorioretinitis	Prednisolone(Glucocorticoid receptor agonist)
		Chorioretinitis	Prednisone(Glucocorticoid receptor agonist)
		choroiditis	Dexamethasone Phosphoric Acid(Glucocorticoid receptor agonist)
		choroiditis	Dexamethasone(Glucocorticoid receptor agonist)
		choroiditis	Prednisolone(Glucocorticoid receptor agonist)
		choroiditis	Prednisone(Glucocorticoid receptor agonist)
		chronic bronchitis	Budesonide(Glucocorticoid receptor agonist)
		chronic bronchitis	Fluticasone Propionate(Glucocorticoid receptor agonist)
		chronic obstructive pulmonary disease	Budesonide(Glucocorticoid receptor agonist)
		chronic obstructive pulmonary disease	Fluticasone Furoate(Glucocorticoid receptor agonist)
		chronic obstructive pulmonary disease	Fluticasone Propionate(Glucocorticoid receptor agonist)
		chronic obstructive pulmonary disease	Prednisolone Phosphoric Acid(Glucocorticoid receptor agonist)
		classic congenital adrenal hyperplasia due to 21-hydroxylase deficiency	Cortisone Acetate(Glucocorticoid receptor agonist)
		classic congenital adrenal hyperplasia due to 21-hydroxylase deficiency	Dexamethasone Phosphoric Acid(Glucocorticoid receptor agonist)
		classic congenital adrenal hyperplasia due to 21-hydroxylase deficiency	Dexamethasone(Glucocorticoid receptor agonist)
		classic congenital adrenal hyperplasia due to 21-hydroxylase deficiency	Hydrocortisone(Glucocorticoid receptor agonist)
		classic congenital adrenal hyperplasia due to 21-hydroxylase deficiency	Prednisolone(Glucocorticoid receptor agonist)
		classic congenital adrenal hyperplasia due to 21-hydroxylase deficiency	Prednisone(Glucocorticoid receptor agonist)
		congenital adrenal hyperplasia	Cortisone Acetate(Glucocorticoid receptor agonist)
		congenital adrenal hyperplasia	Dexamethasone(Glucocorticoid receptor agonist)
		congenital adrenal hyperplasia	Hydrocortisone(Glucocorticoid receptor agonist)
		contact dermatitis	Cortisone Acetate(Glucocorticoid receptor agonist)
		contact dermatitis	Dexamethasone Phosphoric Acid(Glucocorticoid receptor agonist)
		contact dermatitis	Dexamethasone(Glucocorticoid receptor agonist)
		contact dermatitis	Prednisolone(Glucocorticoid receptor agonist)
		contact dermatitis	Prednisone(Glucocorticoid receptor agonist)
		Corneal scarring	Dexamethasone(Glucocorticoid receptor agonist)
		Corneal scarring	Prednisolone Acetate(Glucocorticoid receptor agonist)
		Corneal scarring	Prednisolone Phosphoric Acid(Glucocorticoid receptor agonist)
		Crohn's disease	Budesonide(Glucocorticoid receptor agonist)
		Crohn's disease	Dexamethasone Phosphoric Acid(Glucocorticoid receptor agonist)
		Crohn's disease	Dexamethasone(Glucocorticoid receptor agonist)
		Crohn's disease	Hydrocortisone(Glucocorticoid receptor agonist)
		Crohn's disease	Methylprednisolone(Glucocorticoid receptor agonist)
		Crohn's disease	Prednisolone(Glucocorticoid receptor agonist)
		Crohn's disease	Prednisone(Glucocorticoid receptor agonist)
		Cushing syndrome	Mifepristone(Glucocorticoid receptor antagonist)
		cystoid macular edema	Dexamethasone(Glucocorticoid receptor agonist)
		dermatitis	Betamethasone Acetate(Glucocorticoid receptor agonist)
		dermatitis	Dexamethasone(Glucocorticoid receptor agonist)
		dermatitis	Hydrocortisone(Glucocorticoid receptor agonist)
		dermatitis	Methylprednisolone Acetate(Glucocorticoid receptor agonist)
		dermatitis	Methylprednisolone Hemisuccinate(Glucocorticoid receptor agonist)
		dermatitis	Triamcinolone Acetonide(Glucocorticoid receptor agonist)
		dermatitis herpetiformis	Cortisone Acetate(Glucocorticoid receptor agonist)
		dermatitis herpetiformis	Dexamethasone Phosphoric Acid(Glucocorticoid receptor agonist)
		dermatitis herpetiformis	Dexamethasone(Glucocorticoid receptor agonist)
		dermatitis herpetiformis	Prednisolone(Glucocorticoid receptor agonist)
		dermatitis herpetiformis	Prednisone(Glucocorticoid receptor agonist)
		dermatomyositis	Cortisone Acetate(Glucocorticoid receptor agonist)
		dermatomyositis	Prednisolone(Glucocorticoid receptor agonist)
		dermatomyositis	Prednisone(Glucocorticoid receptor agonist)
		diabetic retinopathy	Dexamethasone(Glucocorticoid receptor agonist)
		dry eye syndrome	Loteprednol Etabonate(Glucocorticoid receptor agonist)
		Duchenne muscular dystrophy	Deflazacort(Glucocorticoid receptor agonist)
		Duchenne muscular dystrophy	Vamorolone(Glucocorticoid receptor agonist)
		emphysema	Budesonide(Glucocorticoid receptor agonist)
		emphysema	Fluticasone Propionate(Glucocorticoid receptor agonist)
		endocrine system disease	Hydrocortisone(Glucocorticoid receptor agonist)
		endocrine system disease	Methylprednisolone(Glucocorticoid receptor agonist)
		endocrine system disease	Prednisone(Glucocorticoid receptor agonist)
		enteritis	Cortisone Acetate(Glucocorticoid receptor agonist)
		eosinophilic pneumonia	Dexamethasone Phosphoric Acid(Glucocorticoid receptor agonist)
		eosinophilic pneumonia	Dexamethasone(Glucocorticoid receptor agonist)
		eosinophilic pneumonia	Prednisolone(Glucocorticoid receptor agonist)
		eosinophilic pneumonia	Prednisone(Glucocorticoid receptor agonist)
		epicondylitis	Prednisolone(Glucocorticoid receptor agonist)
		epicondylitis	Triamcinolone Acetonide(Glucocorticoid receptor agonist)
		erythema multiforme	Cortisone Acetate(Glucocorticoid receptor agonist)
		erythema multiforme	Dexamethasone Phosphoric Acid(Glucocorticoid receptor agonist)
		erythema multiforme	Dexamethasone(Glucocorticoid receptor agonist)
		erythema multiforme	Prednisolone(Glucocorticoid receptor agonist)
		erythema multiforme	Prednisone(Glucocorticoid receptor agonist)
		esophageal disease	Budesonide(Glucocorticoid receptor agonist)
		exanthem	Hydrocortisone(Glucocorticoid receptor agonist)
		exfoliative dermatitis	Cortisone Acetate(Glucocorticoid receptor agonist)
		exfoliative dermatitis	Dexamethasone Phosphoric Acid(Glucocorticoid receptor agonist)
		exfoliative dermatitis	Dexamethasone(Glucocorticoid receptor agonist)
		exfoliative dermatitis	Prednisolone(Glucocorticoid receptor agonist)
		exfoliative dermatitis	Prednisone(Glucocorticoid receptor agonist)
		eye disease	Dexamethasone(Glucocorticoid receptor agonist)
		eye inflammation	Alclometasone Dipropionate(Glucocorticoid receptor agonist)
		eye inflammation	Betamethasone(Glucocorticoid receptor agonist)
		eye inflammation	Cortisone Acetate(Glucocorticoid receptor agonist)
		eye inflammation	Desonide(Glucocorticoid receptor agonist)
		eye inflammation	Dexamethasone(Glucocorticoid receptor agonist)
		eye inflammation	Fluocinolone Acetonide(Glucocorticoid receptor agonist)
		eye inflammation	Fluorometholone(Glucocorticoid receptor agonist)
		eye inflammation	Hydrocortisone(Glucocorticoid receptor agonist)
		eye inflammation	Loteprednol Etabonate(Glucocorticoid receptor agonist)
		eye inflammation	Medrysone(Glucocorticoid receptor agonist)
		eye inflammation	Prednisolone(Glucocorticoid receptor agonist)
		eye inflammation	Rimexolone(Glucocorticoid receptor agonist)
		eye inflammation	Triamcinolone(Glucocorticoid receptor agonist)
		freckles	Fluocinolone Acetonide(Glucocorticoid receptor agonist)
		frozen shoulder	Cortisone Acetate(Glucocorticoid receptor agonist)
		frozen shoulder	Dexamethasone Phosphoric Acid(Glucocorticoid receptor agonist)
		frozen shoulder	Dexamethasone(Glucocorticoid receptor agonist)
		frozen shoulder	Methylprednisolone Acetate(Glucocorticoid receptor agonist)
		frozen shoulder	Methylprednisolone(Glucocorticoid receptor agonist)
		frozen shoulder	Prednisolone(Glucocorticoid receptor agonist)
		frozen shoulder	Prednisone(Glucocorticoid receptor agonist)
		frozen shoulder	Triamcinolone Acetonide(Glucocorticoid receptor agonist)
		fungal infectious disease	Methylprednisolone Acetate(Glucocorticoid receptor agonist)
		fungal infectious disease	Triamcinolone Acetonide(Glucocorticoid receptor agonist)
		gout	Cortisone Acetate(Glucocorticoid receptor agonist)
		gout	Dexamethasone Phosphoric Acid(Glucocorticoid receptor agonist)
		gout	Dexamethasone(Glucocorticoid receptor agonist)
		gout	Prednisolone(Glucocorticoid receptor agonist)
		gout	Prednisone(Glucocorticoid receptor agonist)
		gout	Triamcinolone Acetonide(Glucocorticoid receptor agonist)
		hemolytic anemia	Cortisone Acetate(Glucocorticoid receptor agonist)
		hemolytic anemia	Dexamethasone Phosphoric Acid(Glucocorticoid receptor agonist)
		hemolytic anemia	Dexamethasone(Glucocorticoid receptor agonist)
		hemolytic anemia	Prednisolone(Glucocorticoid receptor agonist)
		hemolytic anemia	Prednisone(Glucocorticoid receptor agonist)
		hemorrhoid	Betamethasone(Glucocorticoid receptor agonist)
		hemorrhoid	Dexamethasone(Glucocorticoid receptor agonist)
		hemorrhoid	Fluocinolone Acetonide(Glucocorticoid receptor agonist)
		hemorrhoid	Fluocinonide(Glucocorticoid receptor agonist)
		hemorrhoid	Fluorometholone(Glucocorticoid receptor agonist)
		hemorrhoid	Hydrocortisone(Glucocorticoid receptor agonist)
		hemorrhoid	Prednisolone(Glucocorticoid receptor agonist)
		hemorrhoid	Triamcinolone(Glucocorticoid receptor agonist)
		Herpes Labialis	Hydrocortisone(Glucocorticoid receptor agonist)
		Herpes simplex infection	Dexamethasone Phosphoric Acid(Glucocorticoid receptor agonist)
		Herpes simplex infection	Dexamethasone(Glucocorticoid receptor agonist)
		Hypercalcemia	Cortisone Acetate(Glucocorticoid receptor agonist)
		Hypercalcemia	Dexamethasone Phosphoric Acid(Glucocorticoid receptor agonist)
		Hypercalcemia	Dexamethasone(Glucocorticoid receptor agonist)
		Hypercalcemia	Prednisolone(Glucocorticoid receptor agonist)
		Hypercalcemia	Prednisone(Glucocorticoid receptor agonist)
		idiopathic pulmonary fibrosis	Prednisolone Phosphoric Acid(Glucocorticoid receptor agonist)
		infection	Betamethasone Dipropionate(Glucocorticoid receptor agonist)
		infection	Dexamethasone(Glucocorticoid receptor agonist)
		infectious disease	Fluocinolone Acetonide(Glucocorticoid receptor agonist)
		inflammation	Dexamethasone Phosphoric Acid(Glucocorticoid receptor agonist)
		inflammation	Dexamethasone(Glucocorticoid receptor agonist)
		inflammation	Difluprednate(Glucocorticoid receptor agonist)
		inflammation	Fluorometholone(Glucocorticoid receptor agonist)
		inflammation	Hydrocortisone Acetate(Glucocorticoid receptor agonist)
		inflammation	Hydrocortisone(Glucocorticoid receptor agonist)
		inflammation	Loteprednol Etabonate(Glucocorticoid receptor agonist)
		inflammation	Methylprednisolone(Glucocorticoid receptor agonist)
		inflammation	Prednisolone Acetate(Glucocorticoid receptor agonist)
		inflammation	Prednisolone Phosphoric Acid(Glucocorticoid receptor agonist)
		inflammation	Prednisone(Glucocorticoid receptor agonist)
		injury	Triamcinolone Acetonide(Glucocorticoid receptor agonist)
		Iridocyclitis	Cortisone Acetate(Glucocorticoid receptor agonist)
		Iridocyclitis	Dexamethasone Phosphoric Acid(Glucocorticoid receptor agonist)
		Iridocyclitis	Dexamethasone(Glucocorticoid receptor agonist)
		Iridocyclitis	Prednisolone(Glucocorticoid receptor agonist)
		Iridocyclitis	Prednisone(Glucocorticoid receptor agonist)
		iritis	Cortisone Acetate(Glucocorticoid receptor agonist)
		iritis	Dexamethasone Phosphoric Acid(Glucocorticoid receptor agonist)
		iritis	Dexamethasone(Glucocorticoid receptor agonist)
		iritis	Prednisolone(Glucocorticoid receptor agonist)
		iritis	Prednisone(Glucocorticoid receptor agonist)
		juvenile dermatomyositis	Prednisone(Glucocorticoid receptor agonist)
		juvenile idiopathic arthritis	Cortisone Acetate(Glucocorticoid receptor agonist)
		juvenile idiopathic arthritis	Dexamethasone Phosphoric Acid(Glucocorticoid receptor agonist)
		juvenile idiopathic arthritis	Dexamethasone(Glucocorticoid receptor agonist)
		juvenile idiopathic arthritis	Hydrocortisone(Glucocorticoid receptor agonist)
		juvenile idiopathic arthritis	Methylprednisolone(Glucocorticoid receptor agonist)
		juvenile idiopathic arthritis	Prednisolone(Glucocorticoid receptor agonist)
		juvenile idiopathic arthritis	Prednisone(Glucocorticoid receptor agonist)
		keratitis	Dexamethasone Phosphoric Acid(Glucocorticoid receptor agonist)
		keratitis	Dexamethasone(Glucocorticoid receptor agonist)
		keratitis	Prednisolone(Glucocorticoid receptor agonist)
		keratitis	Prednisone(Glucocorticoid receptor agonist)
		lateral epicondylitis	Cortisone Acetate(Glucocorticoid receptor agonist)
		lateral epicondylitis	Dexamethasone Phosphoric Acid(Glucocorticoid receptor agonist)
		lateral epicondylitis	Dexamethasone(Glucocorticoid receptor agonist)
		lateral epicondylitis	Prednisolone(Glucocorticoid receptor agonist)
		lateral epicondylitis	Prednisone(Glucocorticoid receptor agonist)
		lateral epicondylitis	Triamcinolone Acetonide(Glucocorticoid receptor agonist)
		leukemia	Cortisone Acetate(Glucocorticoid receptor agonist)
		leukemia	Dexamethasone Phosphoric Acid(Glucocorticoid receptor agonist)
		leukemia	Dexamethasone(Glucocorticoid receptor agonist)
		leukemia	Hydrocortisone(Glucocorticoid receptor agonist)
		leukemia	Methylprednisolone Acetate(Glucocorticoid receptor agonist)
		leukemia	Methylprednisolone Hemisuccinate(Glucocorticoid receptor agonist)
		leukemia	Prednisolone Phosphoric Acid(Glucocorticoid receptor agonist)
		leukemia	Prednisolone(Glucocorticoid receptor agonist)
		leukemia	Prednisone(Glucocorticoid receptor agonist)
		lymphoma	Cortisone Acetate(Glucocorticoid receptor agonist)
		lymphoma	Dexamethasone Phosphoric Acid(Glucocorticoid receptor agonist)
		lymphoma	Dexamethasone(Glucocorticoid receptor agonist)
		lymphoma	Hydrocortisone(Glucocorticoid receptor agonist)
		lymphoma	Methylprednisolone Acetate(Glucocorticoid receptor agonist)
		lymphoma	Methylprednisolone Hemisuccinate(Glucocorticoid receptor agonist)
		lymphoma	Prednisolone(Glucocorticoid receptor agonist)
		lymphoma	Prednisone(Glucocorticoid receptor agonist)
		macular retinal edema	Dexamethasone(Glucocorticoid receptor agonist)
		macular retinal edema	Fluocinolone Acetonide(Glucocorticoid receptor agonist)
		meningeal tuberculosis	Cortisone Acetate(Glucocorticoid receptor agonist)
		meningeal tuberculosis	Dexamethasone Phosphoric Acid(Glucocorticoid receptor agonist)
		meningeal tuberculosis	Dexamethasone(Glucocorticoid receptor agonist)
		meningeal tuberculosis	Prednisolone(Glucocorticoid receptor agonist)
		meningeal tuberculosis	Prednisone(Glucocorticoid receptor agonist)
		multiple sclerosis	Dexamethasone(Glucocorticoid receptor agonist)
		multiple sclerosis	Methylprednisolone Hemisuccinate(Glucocorticoid receptor agonist)
		multiple sclerosis	Methylprednisolone(Glucocorticoid receptor agonist)
		multiple sclerosis	Prednisolone Acetate(Glucocorticoid receptor agonist)
		multiple sclerosis	Prednisolone Phosphoric Acid(Glucocorticoid receptor agonist)
		multiple sclerosis	Prednisolone(Glucocorticoid receptor agonist)
		multiple sclerosis	Prednisone(Glucocorticoid receptor agonist)
		multiple sclerosis	Triamcinolone Acetonide(Glucocorticoid receptor agonist)
		muscular dystrophy	Deflazacort(Glucocorticoid receptor agonist)
		mycosis fungoides	Dexamethasone Phosphoric Acid(Glucocorticoid receptor agonist)
		mycosis fungoides	Dexamethasone(Glucocorticoid receptor agonist)
		mycosis fungoides	Prednisolone(Glucocorticoid receptor agonist)
		mycosis fungoides	Prednisone(Glucocorticoid receptor agonist)
		myocarditis	Dexamethasone Phosphoric Acid(Glucocorticoid receptor agonist)
		myocarditis	Dexamethasone(Glucocorticoid receptor agonist)
		myocarditis	Prednisolone(Glucocorticoid receptor agonist)
		myocarditis	Prednisone(Glucocorticoid receptor agonist)
		Nasal Cavity Polyp	Fluticasone Propionate(Glucocorticoid receptor agonist)
		Nasal Cavity Polyp	Mometasone Furoate(Glucocorticoid receptor agonist)
		Nasal congestion	Beclomethasone Dipropionate(Glucocorticoid receptor agonist)
		Nasal congestion	Betamethasone(Glucocorticoid receptor agonist)
		Nasal congestion	Budesonide(Glucocorticoid receptor agonist)
		Nasal congestion	Ciclesonide(Glucocorticoid receptor agonist)
		Nasal congestion	Dexamethasone(Glucocorticoid receptor agonist)
		Nasal congestion	Flunisolide(Glucocorticoid receptor agonist)
		Nasal congestion	Fluticasone Furoate(Glucocorticoid receptor agonist)
		Nasal congestion	Fluticasone Propionate(Glucocorticoid receptor agonist)
		Nasal congestion	Hydrocortisone(Glucocorticoid receptor agonist)
		Nasal congestion	Mometasone Furoate(Glucocorticoid receptor agonist)
		Nasal congestion	Prednisolone(Glucocorticoid receptor agonist)
		Nasal congestion	Triamcinolone Acetonide(Glucocorticoid receptor agonist)
		Nasal congestion	Triamcinolone(Glucocorticoid receptor agonist)
		Nasal polyposis	Fluticasone Propionate(Glucocorticoid receptor agonist)
		Nasal polyposis	Mometasone Furoate(Glucocorticoid receptor agonist)
		neoplasm	Dexamethasone(Glucocorticoid receptor agonist)
		neoplasm	Prednisone(Glucocorticoid receptor agonist)
		nephrotic syndrome	Betamethasone Acetate(Glucocorticoid receptor agonist)
		nephrotic syndrome	Cortisone Acetate(Glucocorticoid receptor agonist)
		nephrotic syndrome	Dexamethasone Phosphoric Acid(Glucocorticoid receptor agonist)
		nephrotic syndrome	Dexamethasone(Glucocorticoid receptor agonist)
		nephrotic syndrome	Methylprednisolone Acetate(Glucocorticoid receptor agonist)
		nephrotic syndrome	Prednisolone Phosphoric Acid(Glucocorticoid receptor agonist)
		nephrotic syndrome	Prednisolone(Glucocorticoid receptor agonist)
		nephrotic syndrome	Prednisone(Glucocorticoid receptor agonist)
		ophthalmic herpes zoster	Cortisone Acetate(Glucocorticoid receptor agonist)
		ophthalmic herpes zoster	Dexamethasone Phosphoric Acid(Glucocorticoid receptor agonist)
		ophthalmic herpes zoster	Dexamethasone(Glucocorticoid receptor agonist)
		ophthalmic herpes zoster	Prednisolone(Glucocorticoid receptor agonist)
		ophthalmic herpes zoster	Prednisone(Glucocorticoid receptor agonist)
		optic neuritis	Dexamethasone Phosphoric Acid(Glucocorticoid receptor agonist)
		optic neuritis	Dexamethasone(Glucocorticoid receptor agonist)
		optic neuritis	Prednisolone(Glucocorticoid receptor agonist)
		optic neuritis	Prednisone(Glucocorticoid receptor agonist)
		osteoarthritis	Cortisone Acetate(Glucocorticoid receptor agonist)
		osteoarthritis	Dexamethasone Phosphoric Acid(Glucocorticoid receptor agonist)
		osteoarthritis	Dexamethasone(Glucocorticoid receptor agonist)
		osteoarthritis	Hydrocortisone(Glucocorticoid receptor agonist)
		osteoarthritis	Methylprednisolone Acetate(Glucocorticoid receptor agonist)
		osteoarthritis	Methylprednisolone(Glucocorticoid receptor agonist)
		osteoarthritis	Prednisolone(Glucocorticoid receptor agonist)
		osteoarthritis	Prednisone(Glucocorticoid receptor agonist)
		osteoarthritis	Triamcinolone Acetonide(Glucocorticoid receptor agonist)
		osteoarthritis	Triamcinolone Hexacetonide(Glucocorticoid receptor agonist)
		otitis externa	Hydrocortisone(Glucocorticoid receptor agonist)
		pain	Triamcinolone Acetonide(Glucocorticoid receptor agonist)
		pemphigus	Dexamethasone(Glucocorticoid receptor agonist)
		pemphigus	Prednisone(Glucocorticoid receptor agonist)
		pemphigus vulgaris	Dexamethasone Phosphoric Acid(Glucocorticoid receptor agonist)
		pemphigus vulgaris	Dexamethasone(Glucocorticoid receptor agonist)
		pemphigus vulgaris	Prednisone(Glucocorticoid receptor agonist)
		Peptic ulcer	Cortisone Acetate(Glucocorticoid receptor agonist)
		Peptic ulcer	Dexamethasone Phosphoric Acid(Glucocorticoid receptor agonist)
		Peptic ulcer	Dexamethasone(Glucocorticoid receptor agonist)
		Peptic ulcer	Prednisolone(Glucocorticoid receptor agonist)
		Peptic ulcer	Prednisone(Glucocorticoid receptor agonist)
		pneumonia	Cortisone Acetate(Glucocorticoid receptor agonist)
		pneumonia	Dexamethasone Phosphoric Acid(Glucocorticoid receptor agonist)
		pneumonia	Dexamethasone(Glucocorticoid receptor agonist)
		pneumonia	Hydrocortisone(Glucocorticoid receptor agonist)
		pneumonia	Methylprednisolone(Glucocorticoid receptor agonist)
		pneumonia	Prednisolone(Glucocorticoid receptor agonist)
		pneumonia	Prednisone(Glucocorticoid receptor agonist)
		polymyositis	Cortisone Acetate(Glucocorticoid receptor agonist)
		polymyositis	Prednisone(Glucocorticoid receptor agonist)
		posterior uveitis	Cortisone Acetate(Glucocorticoid receptor agonist)
		posterior uveitis	Dexamethasone Phosphoric Acid(Glucocorticoid receptor agonist)
		posterior uveitis	Dexamethasone(Glucocorticoid receptor agonist)
		posterior uveitis	Methylprednisolone(Glucocorticoid receptor agonist)
		posterior uveitis	Prednisolone(Glucocorticoid receptor agonist)
		posterior uveitis	Prednisone(Glucocorticoid receptor agonist)
		primary adrenal insufficiency	Cortisone Acetate(Glucocorticoid receptor agonist)
		primary adrenal insufficiency	Dexamethasone Phosphoric Acid(Glucocorticoid receptor agonist)
		primary adrenal insufficiency	Dexamethasone(Glucocorticoid receptor agonist)
		primary adrenal insufficiency	Prednisolone(Glucocorticoid receptor agonist)
		primary adrenal insufficiency	Prednisone(Glucocorticoid receptor agonist)
		Pruritus	Hydrocortisone Acetate(Glucocorticoid receptor agonist)
		Pruritus	Hydrocortisone(Glucocorticoid receptor agonist)
		psoriasis	Betamethasone Dipropionate(Glucocorticoid receptor agonist)
		psoriasis	Clobetasol Propionate(Glucocorticoid receptor agonist)
		psoriasis	Desoximetasone(Glucocorticoid receptor agonist)
		psoriasis	Dexamethasone Phosphoric Acid(Glucocorticoid receptor agonist)
		psoriasis	Dexamethasone(Glucocorticoid receptor agonist)
		psoriasis	Fluocinolone Acetonide(Glucocorticoid receptor agonist)
		psoriasis	Halobetasol Propionate(Glucocorticoid receptor agonist)
		psoriasis	Hydrocortisone(Glucocorticoid receptor agonist)
		psoriasis	Prednisolone(Glucocorticoid receptor agonist)
		psoriasis	Prednisone(Glucocorticoid receptor agonist)
		psoriasis vulgaris	Betamethasone Dipropionate(Glucocorticoid receptor agonist)
		psoriasis vulgaris	Clobetasol Propionate(Glucocorticoid receptor agonist)
		psoriasis vulgaris	Desoximetasone(Glucocorticoid receptor agonist)
		psoriasis vulgaris	Dexamethasone(Glucocorticoid receptor agonist)
		psoriasis vulgaris	Halobetasol Propionate(Glucocorticoid receptor agonist)
		psoriasis vulgaris	Hydrocortisone(Glucocorticoid receptor agonist)
		psoriatic arthritis	Cortisone Acetate(Glucocorticoid receptor agonist)
		psoriatic arthritis	Dexamethasone Phosphoric Acid(Glucocorticoid receptor agonist)
		psoriatic arthritis	Dexamethasone(Glucocorticoid receptor agonist)
		psoriatic arthritis	Hydrocortisone(Glucocorticoid receptor agonist)
		psoriatic arthritis	Methylprednisolone(Glucocorticoid receptor agonist)
		psoriatic arthritis	Prednisolone(Glucocorticoid receptor agonist)
		psoriatic arthritis	Prednisone(Glucocorticoid receptor agonist)
		pulmonary fibrosis	Prednisolone Phosphoric Acid(Glucocorticoid receptor agonist)
		pulmonary tuberculosis	Cortisone Acetate(Glucocorticoid receptor agonist)
		pulmonary tuberculosis	Dexamethasone Phosphoric Acid(Glucocorticoid receptor agonist)
		pulmonary tuberculosis	Dexamethasone(Glucocorticoid receptor agonist)
		pulmonary tuberculosis	Prednisolone(Glucocorticoid receptor agonist)
		pulmonary tuberculosis	Prednisone(Glucocorticoid receptor agonist)
		pulmonary tuberculosis	Triamcinolone Acetonide(Glucocorticoid receptor agonist)
		rheumatoid arthritis	Cortisone Acetate(Glucocorticoid receptor agonist)
		rheumatoid arthritis	Dexamethasone Phosphoric Acid(Glucocorticoid receptor agonist)
		rheumatoid arthritis	Dexamethasone(Glucocorticoid receptor agonist)
		rheumatoid arthritis	Hydrocortisone(Glucocorticoid receptor agonist)
		rheumatoid arthritis	Methylprednisolone Acetate(Glucocorticoid receptor agonist)
		rheumatoid arthritis	Methylprednisolone Hemisuccinate(Glucocorticoid receptor agonist)
		rheumatoid arthritis	Methylprednisolone(Glucocorticoid receptor agonist)
		rheumatoid arthritis	Prednisolone(Glucocorticoid receptor agonist)
		rheumatoid arthritis	Prednisone(Glucocorticoid receptor agonist)
		rheumatoid arthritis	Triamcinolone Acetonide(Glucocorticoid receptor agonist)
		rhinitis	Flunisolide(Glucocorticoid receptor agonist)
		Rhinitis, Allergic, Perennial	Beclomethasone Dipropionate(Glucocorticoid receptor agonist)
		Rhinitis, Allergic, Perennial	Budesonide(Glucocorticoid receptor agonist)
		Rhinitis, Allergic, Perennial	Ciclesonide(Glucocorticoid receptor agonist)
		Rhinitis, Allergic, Perennial	Fluticasone Furoate(Glucocorticoid receptor agonist)
		sarcoidosis	Dexamethasone Phosphoric Acid(Glucocorticoid receptor agonist)
		sarcoidosis	Dexamethasone(Glucocorticoid receptor agonist)
		sarcoidosis	Prednisolone(Glucocorticoid receptor agonist)
		sarcoidosis	Prednisone(Glucocorticoid receptor agonist)
		seasonal allergic rhinitis	Beclomethasone Dipropionate(Glucocorticoid receptor agonist)
		seasonal allergic rhinitis	Budesonide(Glucocorticoid receptor agonist)
		seasonal allergic rhinitis	Ciclesonide(Glucocorticoid receptor agonist)
		seasonal allergic rhinitis	Dexamethasone Phosphoric Acid(Glucocorticoid receptor agonist)
		seasonal allergic rhinitis	Dexamethasone(Glucocorticoid receptor agonist)
		seasonal allergic rhinitis	Fluticasone Furoate(Glucocorticoid receptor agonist)
		seasonal allergic rhinitis	Fluticasone Propionate(Glucocorticoid receptor agonist)
		seasonal allergic rhinitis	Mometasone Furoate(Glucocorticoid receptor agonist)
		seasonal allergic rhinitis	Prednisone(Glucocorticoid receptor agonist)
		seasonal allergic rhinitis	Triamcinolone Acetonide(Glucocorticoid receptor agonist)
		seborrheic dermatitis	Cortisone Acetate(Glucocorticoid receptor agonist)
		seborrheic dermatitis	Dexamethasone Phosphoric Acid(Glucocorticoid receptor agonist)
		seborrheic dermatitis	Dexamethasone(Glucocorticoid receptor agonist)
		seborrheic dermatitis	Fluocinolone Acetonide(Glucocorticoid receptor agonist)
		seborrheic dermatitis	Hydrocortisone Butyrate(Glucocorticoid receptor agonist)
		seborrheic dermatitis	Hydrocortisone(Glucocorticoid receptor agonist)
		seborrheic dermatitis	Prednisolone(Glucocorticoid receptor agonist)
		seborrheic dermatitis	Prednisone(Glucocorticoid receptor agonist)
		skin disease	Alclometasone Dipropionate(Glucocorticoid receptor agonist)
		skin disease	Betamethasone Dipropionate(Glucocorticoid receptor agonist)
		skin disease	Betamethasone Valerate(Glucocorticoid receptor agonist)
		skin disease	Clobetasol Propionate(Glucocorticoid receptor agonist)
		skin disease	Desonide(Glucocorticoid receptor agonist)
		skin disease	Desoximetasone(Glucocorticoid receptor agonist)
		skin disease	Diflorasone Diacetate(Glucocorticoid receptor agonist)
		skin disease	Fluocinolone Acetonide(Glucocorticoid receptor agonist)
		skin disease	Fluocinonide(Glucocorticoid receptor agonist)
		skin disease	Flurandrenolide(Glucocorticoid receptor agonist)
		skin disease	Fluticasone Propionate(Glucocorticoid receptor agonist)
		skin disease	Halcinonide(Glucocorticoid receptor agonist)
		skin disease	Halobetasol Propionate(Glucocorticoid receptor agonist)
		skin disease	Hydrocortisone Acetate(Glucocorticoid receptor agonist)
		skin disease	Hydrocortisone Butyrate(Glucocorticoid receptor agonist)
		skin disease	Hydrocortisone Probutate(Glucocorticoid receptor agonist)
		skin disease	Hydrocortisone(Glucocorticoid receptor agonist)
		skin disease	Mometasone Furoate(Glucocorticoid receptor agonist)
		skin disease	Prednicarbate(Glucocorticoid receptor agonist)
		skin disease	Triamcinolone Acetonide(Glucocorticoid receptor agonist)
		skin disease	Triamcinolone(Glucocorticoid receptor agonist)
		spondylitis	Hydrocortisone(Glucocorticoid receptor agonist)
		spondylitis	Prednisone(Glucocorticoid receptor agonist)
		Stevens-Johnson syndrome	Cortisone Acetate(Glucocorticoid receptor agonist)
		Stevens-Johnson syndrome	Dexamethasone Phosphoric Acid(Glucocorticoid receptor agonist)
		Stevens-Johnson syndrome	Dexamethasone(Glucocorticoid receptor agonist)
		Stevens-Johnson syndrome	Prednisone(Glucocorticoid receptor agonist)
		subacute thyroiditis	Cortisone Acetate(Glucocorticoid receptor agonist)
		subacute thyroiditis	Dexamethasone Phosphoric Acid(Glucocorticoid receptor agonist)
		subacute thyroiditis	Dexamethasone(Glucocorticoid receptor agonist)
		subacute thyroiditis	Prednisolone(Glucocorticoid receptor agonist)
		subacute thyroiditis	Prednisone(Glucocorticoid receptor agonist)
		sympathetic ophthalmia	Cortisone Acetate(Glucocorticoid receptor agonist)
		sympathetic ophthalmia	Dexamethasone Phosphoric Acid(Glucocorticoid receptor agonist)
		sympathetic ophthalmia	Dexamethasone(Glucocorticoid receptor agonist)
		sympathetic ophthalmia	Prednisolone(Glucocorticoid receptor agonist)
		sympathetic ophthalmia	Prednisone(Glucocorticoid receptor agonist)
		synovitis	Cortisone Acetate(Glucocorticoid receptor agonist)
		synovitis	Dexamethasone Phosphoric Acid(Glucocorticoid receptor agonist)
		synovitis	Dexamethasone(Glucocorticoid receptor agonist)
		synovitis	Prednisolone(Glucocorticoid receptor agonist)
		synovitis	Prednisone(Glucocorticoid receptor agonist)
		systemic lupus erythematosus	Cortisone Acetate(Glucocorticoid receptor agonist)
		systemic lupus erythematosus	Dexamethasone Phosphoric Acid(Glucocorticoid receptor agonist)
		systemic lupus erythematosus	Dexamethasone(Glucocorticoid receptor agonist)
		systemic lupus erythematosus	Prednisolone(Glucocorticoid receptor agonist)
		systemic lupus erythematosus	Prednisone(Glucocorticoid receptor agonist)
		tenosynovitis	Cortisone Acetate(Glucocorticoid receptor agonist)
		tenosynovitis	Dexamethasone Phosphoric Acid(Glucocorticoid receptor agonist)
		tenosynovitis	Dexamethasone(Glucocorticoid receptor agonist)
		tenosynovitis	Hydrocortisone(Glucocorticoid receptor agonist)
		tenosynovitis	Methylprednisolone(Glucocorticoid receptor agonist)
		tenosynovitis	Prednisolone(Glucocorticoid receptor agonist)
		tenosynovitis	Prednisone(Glucocorticoid receptor agonist)
		tenosynovitis	Triamcinolone Acetonide(Glucocorticoid receptor agonist)
		Thrombocytopenia	Cortisone Acetate(Glucocorticoid receptor agonist)
		Thrombocytopenia	Dexamethasone Phosphoric Acid(Glucocorticoid receptor agonist)
		Thrombocytopenia	Dexamethasone(Glucocorticoid receptor agonist)
		Thrombocytopenia	Prednisolone(Glucocorticoid receptor agonist)
		Thrombocytopenia	Prednisone(Glucocorticoid receptor agonist)
		trichinosis	Dexamethasone Phosphoric Acid(Glucocorticoid receptor agonist)
		trichinosis	Dexamethasone(Glucocorticoid receptor agonist)
		trichinosis	Prednisolone(Glucocorticoid receptor agonist)
		trichinosis	Prednisone(Glucocorticoid receptor agonist)
		type III hypersensitivity reaction disease	Betamethasone Acetate(Glucocorticoid receptor agonist)
		type III hypersensitivity reaction disease	Dexamethasone Phosphoric Acid(Glucocorticoid receptor agonist)
		type III hypersensitivity reaction disease	Dexamethasone(Glucocorticoid receptor agonist)
		type III hypersensitivity reaction disease	Hydrocortisone(Glucocorticoid receptor agonist)
		type III hypersensitivity reaction disease	Methylprednisolone Acetate(Glucocorticoid receptor agonist)
		type III hypersensitivity reaction disease	Methylprednisolone Hemisuccinate(Glucocorticoid receptor agonist)
		type III hypersensitivity reaction disease	Prednisolone(Glucocorticoid receptor agonist)
		type III hypersensitivity reaction disease	Prednisone(Glucocorticoid receptor agonist)
		type III hypersensitivity reaction disease	Triamcinolone Acetonide(Glucocorticoid receptor agonist)
		ulcerative colitis	Betamethasone Acetate(Glucocorticoid receptor agonist)
		ulcerative colitis	Betamethasone Phosphoric Acid(Glucocorticoid receptor agonist)
		ulcerative colitis	Budesonide(Glucocorticoid receptor agonist)
		ulcerative colitis	Dexamethasone Phosphoric Acid(Glucocorticoid receptor agonist)
		ulcerative colitis	Dexamethasone(Glucocorticoid receptor agonist)
		ulcerative colitis	Hydrocortisone(Glucocorticoid receptor agonist)
		ulcerative colitis	Methylprednisolone(Glucocorticoid receptor agonist)
		ulcerative colitis	Prednisolone(Glucocorticoid receptor agonist)
		ulcerative colitis	Prednisone(Glucocorticoid receptor agonist)
		uremia	Prednisolone Phosphoric Acid(Glucocorticoid receptor agonist)
		uveitis	Dexamethasone(Glucocorticoid receptor agonist)
		uveitis	Fluocinolone Acetonide(Glucocorticoid receptor agonist)
		uveitis	Methylprednisolone Acetate(Glucocorticoid receptor agonist)
		uveitis	Prednisolone Phosphoric Acid(Glucocorticoid receptor agonist)
EAS & EUR	PGR	acne	Drospirenone(Progesterone receptor agonist)
		acne	Norethindrone Acetate(Progesterone receptor agonist)
		acne	Norgestimate(Progesterone receptor agonist)
		AIDS	Megestrol Acetate(Progesterone receptor agonist)
		amenorrhea	Progesterone(Progesterone receptor agonist)
		Anorexia	Megestrol Acetate(Progesterone receptor agonist)
		Atypical Endometrial Hyperplasia	Progesterone(Progesterone receptor agonist)
		breast fibrocystic disease	Danazol(Progesterone receptor agonist)
		Cachexia	Megestrol Acetate(Progesterone receptor agonist)
		cancer	Megestrol Acetate(Progesterone receptor agonist)
		contraception	Ulipristal Acetate(Progesterone receptor modulator)
		Cushing syndrome	Mifepristone(Progesterone receptor antagonist)
		endometriosis	Danazol(Progesterone receptor agonist)
		endometriosis	Medroxyprogesterone Acetate(Progesterone receptor agonist)
		endometriosis	Norethindrone Acetate(Progesterone receptor agonist)
		hemorrhage	Medroxyprogesterone Acetate(Progesterone receptor agonist)
		hemorrhage	Norgestrel(Progesterone receptor agonist)
		hemorrhage	Progesterone(Progesterone receptor agonist)
		hyperplasia	Medroxyprogesterone Acetate(Progesterone receptor agonist)
		hypogonadism	Norethindrone Acetate(Progesterone receptor agonist)
		inborn error of immunity	Megestrol Acetate(Progesterone receptor agonist)
		leiomyoma	Ulipristal Acetate(Progesterone receptor modulator)
		Menorrhagia	Levonorgestrel(Progesterone receptor agonist)
		neoplasm	Medroxyprogesterone Acetate(Progesterone receptor agonist)
		neoplasm	Megestrol Acetate(Progesterone receptor agonist)
		premature birth	Hydroxyprogesterone Caproate(Progesterone receptor agonist)
		renal carcinoma	Medroxyprogesterone Acetate(Progesterone receptor agonist)
		renal cell carcinoma	Medroxyprogesterone Acetate(Progesterone receptor agonist)
		uterine fibroid	Ulipristal Acetate(Progesterone receptor modulator)
		Uterine leiomyoma	Ulipristal Acetate(Progesterone receptor modulator)
EAS & EUR	PPARG	cardiovascular disease	Bezafibrate(Peroxisome proliferator-activated receptor agonist)
		diabetes mellitus	Pioglitazone(Peroxisome proliferator-activated receptor gamma agonist)
		diabetes mellitus	Rosiglitazone(Peroxisome proliferator-activated receptor gamma agonist)
		diabetes mellitus	Troglitazone(Peroxisome proliferator-activated receptor gamma agonist)
		liver disease	Pioglitazone(Peroxisome proliferator-activated receptor gamma agonist)
		proctitis	Mesalamine(Peroxisome proliferator-activated receptor gamma agonist)
		type 2 diabetes mellitus	Pioglitazone(Peroxisome proliferator-activated receptor gamma agonist)
		type 2 diabetes mellitus	Rosiglitazone(Peroxisome proliferator-activated receptor gamma agonist)
		ulcerative colitis	Balsalazide(Peroxisome proliferator-activated receptor gamma agonist)
		ulcerative colitis	Mesalamine(Peroxisome proliferator-activated receptor gamma agonist)
		ulcerative colitis	Olsalazine(Peroxisome proliferator-activated receptor gamma agonist)
EUR	VDR	anemia (phenotype)	Cholecalciferol(Vitamin D receptor agonist)
		chronic kidney disease	Calcifediol Anhydrous(Vitamin D receptor agonist)
		chronic kidney disease	Calcitriol(Vitamin D receptor agonist)
		chronic kidney disease	Doxercalciferol(Vitamin D receptor agonist)
		chronic kidney disease	Paricalcitol(Vitamin D receptor agonist)
		Hypocalcemia	Calcitriol(Vitamin D receptor agonist)
		hypoparathyroidism	Calcitriol(Vitamin D receptor agonist)
		hypoparathyroidism	Ergocalciferol(Vitamin D receptor agonist)
		Hypophosphatemia	Ergocalciferol(Vitamin D receptor agonist)
		hypophosphatemic rickets	Ergocalciferol(Vitamin D receptor agonist)
		Iron deficiency anemia	Cholecalciferol(Vitamin D receptor agonist)
		osteoporosis	Cholecalciferol(Vitamin D receptor agonist)
		parathyroid disease	Calcifediol Anhydrous(Vitamin D receptor agonist)
		parathyroid disease	Doxercalciferol(Vitamin D receptor agonist)
		parathyroid disease	Paricalcitol(Vitamin D receptor agonist)
		psoriasis	Calcipotriene(Vitamin D receptor agonist)
		psoriasis	Calcitriol(Vitamin D receptor agonist)
		psoriasis vulgaris	Calcipotriene(Vitamin D receptor agonist)
		psoriasis vulgaris	Calcitriol(Vitamin D receptor agonist)
		secondary hyperparathyroidism	Calcifediol Anhydrous(Vitamin D receptor agonist)
		secondary hyperparathyroidism	Doxercalciferol(Vitamin D receptor agonist)
		secondary hyperparathyroidism	Paricalcitol(Vitamin D receptor agonist)
